# Supplementary material for: Automated exploration of the conformational degrees of freedom along reaction profiles - driving a FASTCAR
Source: Royal Society of Chemistry journal article supplement (doi:10.1039/d4cp01721h), 2024-01-01
Supplement: d4cp01721h1.pdf [file d4cp01721h1.pdf]

# Automated exploration of the conformational degrees of freedom along reaction profiles - driving a FASTCAR

Oscar Gayraud,<sup>\*a,b</sup>, Bastien Courbière<sup>a,c</sup> and Frédéric Guégan<sup>\*a</sup>

July 29, 2024

<sup>a</sup> *Applied Quantum Chemistry Group, E4 Team, IC2MP UMR 7285,  
Université de Poitiers - CNRS, Poitiers 86073, France.*

*E-mail: frederic.guegan@univ-poitiers.fr*

<sup>b</sup> *Spectrometry, Interaction and Theoretical Chemistry team, DCM UMR  
5250, Université Grenoble Alpes - CNRS, Grenoble 38058, France.*

*E-mail: oscar.gayraud@univ-grenoble-alpes.fr*

<sup>c</sup> *Sorbonne Université, CNRS, Laboratoire de Chimie Théorique CC 137,  
Paris Cedex 05 75252, France.*

# Contents

|          |                                             |            |
|----------|---------------------------------------------|------------|
| <b>1</b> | <b>RSMD threshold - additional elements</b> | <b>4</b>   |
| <b>2</b> | <b>Computational details</b>                | <b>6</b>   |
| <b>3</b> | <b>Acidic intramolecular cyclisation</b>    | <b>7</b>   |
| 3.1      | Major diastereoisomer . . . . .             | 7          |
| 3.1.1    | Starting TS first run . . . . .             | 7          |
| 3.1.2    | Lowest TS first run . . . . .               | 8          |
| 3.1.3    | Additional TS first run . . . . .           | 10         |
| 3.1.4    | Starting TS second run . . . . .            | 18         |
| 3.1.5    | Lowest TS second run . . . . .              | 19         |
| 3.1.6    | Additional TS second run . . . . .          | 21         |
| 3.2      | Minor diastereoisomer . . . . .             | 24         |
| 3.2.1    | Starting TS . . . . .                       | 24         |
| 3.2.2    | Lowest TS . . . . .                         | 26         |
| 3.2.3    | Additional TS . . . . .                     | 27         |
| <b>4</b> | <b>Black rearrangement</b>                  | <b>35</b>  |
| 4.1      | Major enantiomer . . . . .                  | 35         |
| 4.1.1    | Starting TS . . . . .                       | 35         |
| 4.1.2    | Lowest TS . . . . .                         | 37         |
| 4.1.3    | Additional TS . . . . .                     | 38         |
| 4.2      | Minor enantiomer . . . . .                  | 82         |
| 4.2.1    | Starting TS . . . . .                       | 82         |
| 4.2.2    | Lowest TS . . . . .                         | 84         |
| 4.2.3    | Additional TS . . . . .                     | 86         |
| <b>5</b> | <b>Diels-Alder</b>                          | <b>100</b> |
| 5.1      | Endo . . . . .                              | 100        |
| 5.1.1    | Starting TS . . . . .                       | 100        |
| 5.1.2    | Lowest TS . . . . .                         | 102        |
| 5.1.3    | Additional TS . . . . .                     | 103        |
| 5.2      | Exo . . . . .                               | 322        |
| 5.2.1    | Starting TS . . . . .                       | 322        |
| 5.2.2    | Lowest TS . . . . .                         | 323        |
| 5.2.3    | Additional TS . . . . .                     | 325        |

|          |                                                               |            |
|----------|---------------------------------------------------------------|------------|
| <b>6</b> | <b>Regioselective intramolecular radical H-atom transfer</b>  | <b>493</b> |
| 6.1      | 1,5 HAT . . . . .                                             | 493        |
| 6.1.1    | Starting TS . . . . .                                         | 493        |
| 6.1.2    | Lowest TS . . . . .                                           | 494        |
| 6.1.3    | Additional TS . . . . .                                       | 495        |
| 6.2      | 1,6 HAT . . . . .                                             | 576        |
| 6.2.1    | Starting TS . . . . .                                         | 576        |
| 6.2.2    | Lowest TS . . . . .                                           | 577        |
| 6.2.3    | Additional TS . . . . .                                       | 578        |
| <b>7</b> | <b>Enantioselective dialkylzinc additions on benzaldehyde</b> | <b>628</b> |
| 7.1      | <b>25</b> <i>anti pro-R</i> . . . . .                         | 628        |
| 7.1.1    | Starting TS . . . . .                                         | 628        |
| 7.1.2    | Lowest TS . . . . .                                           | 631        |
| 7.1.3    | Additional TS . . . . .                                       | 634        |
| 7.2      | <b>26</b> <i>anti pro-S</i> . . . . .                         | 639        |
| 7.2.1    | Starting TS . . . . .                                         | 639        |
| 7.2.2    | Lowest TS . . . . .                                           | 642        |
| 7.2.3    | Additional TS . . . . .                                       | 644        |
| 7.3      | <b>27</b> <i>syn pro-R</i> . . . . .                          | 652        |
| 7.3.1    | Starting TS . . . . .                                         | 652        |
| 7.3.2    | Lowest TS . . . . .                                           | 655        |
| 7.3.3    | Additional TS . . . . .                                       | 658        |
| 7.4      | <b>28</b> <i>syn pro-S</i> . . . . .                          | 663        |
| 7.4.1    | Starting TS . . . . .                                         | 663        |
| 7.4.2    | Lowest TS . . . . .                                           | 666        |
| 7.4.3    | Additional TS with <b>28</b> conformation . . . . .           | 668        |
| 7.4.4    | Additional TS with <b>26</b> conformation . . . . .           | 682        |

## 1 RSMD threshold - additional elements

In order to highlight the adequacy of the chosen RMSD threshold, we conducted additional test calculations in the case of the major reaction pathway in the organocatalysed Black rearrangement. We opted here for a CREST search using a solvent model (CH<sub>2</sub>Cl<sub>2</sub>, only available in CREST with a similar polarity to that of 2-methyl-2-propanol) with default parameters, a cregen

pruning with an energy window of 30 kcal/mol (default parameter in FASTCAR), and with variable RMSD thresholds: 0.0, 0.3, 0.5 and 0.7. The same starting transition state structure was used in all cases (first structure in subsection 4.1).

The CREST analysis resulted in this case in 23 proposed structures, reducing to 21 candidates after cregen. We list in Table 1 the number of unique, duplicate and "garbage" structures reported after each FASTCAR run, along with the energy of the lowest transition state structure and the energy span covered by the TS structures.

| RMSD value | U. | D. | G. | $E_{min}$      |
|------------|----|----|----|----------------|
| 0.0        | 7  | 2  | 11 | -1488.75261373 |
| 0.3        | 5  | 3  | 4  | -1488.75261367 |
| 0.5        | 6  | 1  | 3  | -1488.75261370 |
| 0.7        | 4  | 0  | 2  | -1488.75261373 |

Table 1: Impact of the RMSD threshold on the number of unique (U.), duplicate (D.) and garbage (G.) TS structures. In all cases the energy of the lowest TS structures is given, in atomic units.

When the RMSD threshold is set to zero (all structures considered), one may note that the major consequence is an explosion in the number of garbage structures (non TS or not converging): most of the computational effort at the DFT level is "lost" on irrelevant geometries. As one may note, the lowest energy structure is in any case always located, which suggests that - at least in this case - the RMSD cut-off does not alter the location of the lowest energy TS structure.

On the other hand, the variation in the total number of structures (from 7 to 4) indicates that the RMSD cut-off may alter the coverage of the intermediate energy landscape. We list in Table 2 the relative energies of the recovered structures in the 4 runs, identifying the structures to their number in the RMSD=0 case.

As one can see from this, the energy window spanned by the TS structure is the same when the RMSD threshold is set to 0.3, 0.5 and 0.7. The missing structures are in fact here found at intermediate energies, which implies the RMSD cut-off is likely to alter conclusions drawn from an ensemble analysis (*e.g.* Maxwell-Boltzmann statistical analysis). At 0.7, two low-energy structures (0.6 and 1.4 kcal/mol) are missed, hence the error is expected large. At

0.5, one may note that all relevant structures are identified. More surprising is the disappearance of structure number 4 at RMSD=0.3. A detailed analysis of the ensemble of structures produced by CREST reveals that the two ensembles are not exactly equivalent: in the case of the RMSD=0.3 run, structure number 4 was in fact never produced. This result highlights a rather important fact: although CREST consistently predicted the lowest energy conformer, the same is not necessarily true for the list of low-lying structures. When interested in ensemble data, one should thus run several independent jobs (or iterative ones) to ensure no structure is left behind.

| Struc. | RMSD=0.7 | RMSD=0.5 | RMSD=0.3 | RMSD=0 |
|--------|----------|----------|----------|--------|
| 1      | 0.0      | 0.0      | 0.0      | 0.0    |
| 2      |          | 0.6      | 0.6      | 0.6    |
| 3      |          | 1.4      | 1.4      | 1.4    |
| 4      | 1.7      | 1.7      |          | 1.7    |
| 5      | 1.8      | 1.8      | 1.8      | 1.8    |
| 6      | 2.2      | 2.2      | 2.2      | 2.2    |
| 7      |          |          |          | 3.5    |

Table 2: Relative energies of the unique transition state structures from the FASTCAR runs with varying RMSD. Values in kcal/mol.

## 2 Computational details

For the sake of clarity, the chosen levels of theory are as follows:

- B3LYP-D3BJ/6-31G(d,p) for the acidic cyclization.
- IEFPCM(2-Methyl-2-Propanol)-B3LYP-D3/6-31G(d,p) for the first refinement step then IEFPCM(2-Methyl-2-Propanol)-B3LYP-D3/6-311++G(d,p) for the second refinement step for the Black rearrangement.
- B3LYP-D3/6-31G(d,p) for the Diels-Alder reaction.
- IEFPCM(dichloroethane)- $\omega$ B97wD/6-31++G(d,p) for the first refinement step and IEFPCM(dichloroethane)- $\omega$ B97wD/6-311++G(d,p) for the second refinement step for the regioselective intramolecular radical H-atom transfer.

- BP86/SVP for the enantioselective dialkylzinc additions on benzaldehyde.

The names of TSs resulting from FASTCAR are composed as follows: TS + the name of the basis set, if two steps have been selected + the number of the conformers after CREGEN.

## 3 Acidic intramolecular cyclisation

### 3.1 Major diastereoisomer

#### 3.1.1 Starting TS first run

TS Input 1

E(RB3LYP) = -1097.26170428 A.U.

First frequency = -247.3758 cm<sup>-1</sup>

|   |               |               |               |
|---|---------------|---------------|---------------|
| C | -1.7077801642 | 0.0578261594  | 0.9295358505  |
| C | -0.4647471826 | -0.476297834  | 1.6906248616  |
| C | -1.6158544338 | 1.2778598663  | 0.0018902299  |
| C | -1.0184407984 | 0.7117233239  | -1.3235914153 |
| C | 0.4695893229  | 0.2641170881  | -1.2884686817 |
| N | 0.7638786945  | -0.5235293473 | 1.1312046886  |
| C | 1.249348577   | 0.3751917742  | 0.0436595112  |
| H | 1.0135078616  | 0.8874803417  | -1.9992266756 |
| H | 0.5684041809  | -0.7599726639 | -1.6614512321 |
| C | 1.7604169891  | -1.3451747894 | 1.8525875513  |
| C | 2.6457036504  | -2.072675256  | 0.8498963595  |
| H | 1.2070155177  | -2.038538143  | 2.4815044463  |
| H | 2.3664402202  | -0.7043675738 | 2.5025037104  |
| C | 2.722483686   | 0.1485827031  | -0.2715946335 |
| H | 1.1680091251  | 1.4000096435  | 0.4050240923  |
| C | 3.377213682   | -1.0531036724 | 0.0203124404  |
| H | 2.0263331973  | -2.7329568708 | 0.2294132337  |
| H | 3.3536648626  | -2.7091505741 | 1.3882040802  |
| C | 3.4141499294  | 1.1689179814  | -0.9358724837 |
| C | 4.7347980595  | 0.987247662   | -1.3368546788 |
| C | 5.3811808214  | -0.2214757515 | -1.0672868583 |
| C | 4.7056242616  | -1.2276175852 | -0.3810774636 |

|   |               |               |               |
|---|---------------|---------------|---------------|
| H | 5.2118334899  | -2.1576842688 | -0.1389753185 |
| H | 6.4119029384  | -0.3698491833 | -1.372755813  |
| H | 2.9164938313  | 2.113511958   | -1.138437813  |
| H | 5.2589590676  | 1.7871016562  | -1.8495081288 |
| C | -1.0269470987 | 2.5459669497  | 0.6700673033  |
| H | -2.6578983796 | 1.5201130336  | -0.2362551831 |
| H | -0.1869143888 | 2.263697105   | 1.314843652   |
| C | -2.0757928639 | 3.2141149005  | 1.5710101079  |
| C | -0.5187417488 | 3.53868128    | -0.3837641906 |
| H | -0.1448637388 | 4.4427919309  | 0.1038337984  |
| H | -1.3284983741 | 3.833519541   | -1.0597724605 |
| H | 0.2929539995  | 3.1276839654  | -0.9906524149 |
| H | -2.4430904126 | 2.5298833507  | 2.3380854326  |
| H | -2.933486066  | 3.5505249575  | 0.9779150323  |
| H | -1.6434308456 | 4.0885648096  | 2.0654860646  |
| O | -2.7354291159 | 0.1268482139  | 1.787615931   |
| O | -0.7403849016 | -0.9889058761 | 2.7842496259  |
| C | -1.9640851894 | -0.4452753069 | -1.4718232079 |
| H | -1.1621235107 | 1.4307298312  | -2.1302166017 |
| C | -3.022782502  | -0.5115157263 | -2.3558750993 |
| C | -1.9209946008 | -1.3107729729 | -0.3132765716 |
| C | -3.0099394363 | -2.2332965742 | -0.100900282  |
| C | -4.0680626187 | -2.2656415281 | -0.9741490694 |
| C | -4.0588096637 | -1.4211078936 | -2.1072611175 |
| H | -0.9521178867 | -1.778959994  | -0.1365577038 |
| H | -2.9611276146 | -2.9123152496 | 0.7439182839  |
| H | -3.0852611661 | 0.1701963036  | -3.1966465484 |
| H | -4.8960989673 | -2.9475602666 | -0.8218659174 |
| H | -4.9000715796 | -1.4566283958 | -2.7925159938 |
| H | -2.4404717164 | -0.403296033  | 2.57068827    |
| H | -2.4404717164 | -0.403296033  | 2.57068827    |

### 3.1.2 Lowest TS first run

TS 0008

$E(\text{RB3LYP}) = -1097.26674653 \text{ A.U.}$

First frequency =  $-271.4263 \text{ cm}^{-1}$

|   |               |               |               |
|---|---------------|---------------|---------------|
| C | -1.9555417974 | 0.0969958823  | 0.8724218198  |
| C | -0.5590570266 | 0.425980407   | 1.4774423002  |
| C | -2.293692451  | -0.0802637328 | -0.6209153265 |
| C | -1.2873849681 | -1.1587304731 | -1.1107792922 |
| C | 0.0619057399  | -0.5759487594 | -1.587498353  |
| N | 0.564798074   | 0.2238274957  | 0.7586433887  |
| C | 0.6200519698  | 0.5459209479  | -0.6888486695 |
| H | -0.0888685685 | -0.1638996889 | -2.5862572079 |
| H | 0.8018027242  | -1.3722586981 | -1.6936366624 |
| C | 1.8219308398  | -0.0044366132 | 1.4837282927  |
| C | 2.7733493958  | 1.1617671044  | 1.2747403392  |
| H | 2.2654603771  | -0.927805417  | 1.0953473174  |
| H | 1.5739800191  | -0.1490336651 | 2.5330242034  |
| C | 2.0068727579  | 1.0162506207  | -1.1246007047 |
| H | -0.021811212  | 1.4191367275  | -0.8069453666 |
| C | 3.0097325004  | 1.3555500824  | -0.2009652364 |
| H | 3.7188633834  | 0.9689121386  | 1.7900629055  |
| H | 2.3384167013  | 2.063390841   | 1.7240574629  |
| C | 2.2543857378  | 1.2021882677  | -2.4928351435 |
| C | 3.4742316094  | 1.7002645248  | -2.9421986705 |
| C | 4.4738904799  | 2.0238798807  | -2.0240850622 |
| C | 4.2351951065  | 1.8475164418  | -0.6648288532 |
| H | 5.0078885112  | 2.0909113035  | 0.0589703419  |
| H | 5.4301193924  | 2.4075042581  | -2.3649086807 |
| H | 1.4878475173  | 0.9704581473  | -3.2231294253 |
| H | 3.6405617635  | 1.8344954065  | -4.0060547509 |
| C | -2.4926852689 | 1.1691174074  | -1.5172426761 |
| H | -3.2859320566 | -0.5445184637 | -0.5995443416 |
| H | -1.5410413357 | 1.6749258187  | -1.6950920177 |
| C | -3.4487682078 | 2.192788051   | -0.8918646681 |
| C | -3.0293999912 | 0.7107783588  | -2.8833111954 |
| H | -3.1840781383 | 1.5770480288  | -3.532011392  |
| H | -3.992008126  | 0.1995976712  | -2.7711214879 |
| H | -2.3428896951 | 0.031463829   | -3.3959641978 |
| H | -3.6254670221 | 3.0066653044  | -1.6008069249 |
| H | -3.0488200489 | 2.6239090823  | 0.0274820979  |
| H | -4.415092445  | 1.7356079468  | -0.6546482958 |
| O | -2.9034144353 | 0.679267958   | 1.6091087573  |



|   |               |               |               |
|---|---------------|---------------|---------------|
| O | -0.5929910309 | 0.6929268884  | 2.6821650477  |
| C | -1.1041526937 | -2.074393561  | 0.0806124296  |
| H | -1.7160267535 | -1.7219443992 | -1.9459738001 |
| C | -0.0550616655 | -2.9594539344 | 0.2681692131  |
| C | -1.9693590981 | -1.7516922191 | 1.1900078657  |
| C | -1.6538858584 | -2.2584559434 | 2.4975349704  |
| C | -0.5645483656 | -3.0770692555 | 2.6726943746  |
| C | 0.2014115175  | -3.4576630386 | 1.5488573161  |
| H | -3.0388533387 | -1.7490364154 | 0.9873251237  |
| H | -2.3077684013 | -2.0101954119 | 3.3263883947  |
| H | 0.6099403779  | -3.2166220762 | -0.547594005  |
| H | -0.3081491359 | -3.4623643195 | 3.6523053461  |
| H | 1.0443231762  | -4.1266026839 | 1.6906310768  |
| H | -2.4556204483 | 0.930863907   | 2.4527247926  |
| H | -2.4556204483 | 0.930863907   | 2.4527247926  |

### 3.1.3 Additional TS first run

TS 0001

E(RB3LYP) = -1097.26550793 A.U.

First frequency = -363.3322  $\text{cm}^{-1}$

|   |               |               |               |
|---|---------------|---------------|---------------|
| C | -1.435464588  | 0.0160608916  | 0.9109324442  |
| C | -0.6699773824 | 1.3530961837  | 0.9999420256  |
| C | -2.2421371852 | -0.311499115  | -0.3447898075 |
| C | -1.2105647392 | -0.8406678677 | -1.3780318821 |
| C | -0.4115181872 | 0.2885293283  | -2.0465522209 |
| N | -0.0084237144 | 1.8896923174  | -0.0494309813 |
| C | 0.5347105004  | 1.2071317745  | -1.2563398711 |
| H | -1.1418881257 | 0.9372683837  | -2.5332217844 |
| H | 0.1787275773  | -0.1320834452 | -2.8623818244 |
| C | 0.8327531552  | 3.0608391451  | 0.2755410293  |
| C | 2.1772864576  | 2.5587227504  | 0.8079401943  |
| H | 0.3180559557  | 3.6757752284  | 1.0099973643  |
| H | 0.9521782073  | 3.6374169419  | -0.6433606313 |
| C | 1.9334218683  | 0.6718432807  | -0.9152534735 |
| H | 0.6932507075  | 2.0365446664  | -1.9522107144 |
| C | 2.7061090868  | 1.3557486056  | 0.0458729234  |

|   |               |               |               |
|---|---------------|---------------|---------------|
| H | 2.0570451615  | 2.2845916066  | 1.8624077729  |
| H | 2.9108811582  | 3.3707225683  | 0.7809870583  |
| C | 2.4765286678  | -0.4440425612 | -1.5644915294 |
| C | 3.7587142934  | -0.8954381563 | -1.264385165  |
| C | 4.522229087   | -0.2259489828 | -0.307281401  |
| C | 3.9933542117  | 0.8883720467  | 0.3370937445  |
| H | 4.5845004028  | 1.4136573981  | 1.0819669619  |
| H | 5.5222564849  | -0.5702886123 | -0.0646765209 |
| H | 1.8944354648  | -0.9844220659 | -2.3011617999 |
| H | 4.15562425    | -1.7677164606 | -1.7729877183 |
| C | -3.1607664669 | 0.8480055034  | -0.7974894551 |
| H | -2.8829267245 | -1.1538628409 | -0.0609925309 |
| H | -2.5341698665 | 1.6994996566  | -1.0837235211 |
| C | -4.0988684409 | 1.3181634107  | 0.3240965113  |
| C | -3.9746358196 | 0.408856083   | -2.0235950476 |
| H | -4.6386343911 | 1.2179587885  | -2.3393880183 |
| H | -4.594610749  | -0.4621791594 | -1.785243575  |
| H | -3.3410447073 | 0.1489634562  | -2.875914231  |
| H | -3.5556134526 | 1.752861008   | 1.1659019824  |
| H | -4.7037858538 | 0.4889873953  | 0.7052364582  |
| H | -4.7777251467 | 2.0828730534  | -0.0634353849 |
| O | -2.0839978681 | -0.195776454  | 2.0490112255  |
| O | -0.7456991957 | 1.9025827379  | 2.1082501212  |
| C | -0.472924485  | -1.8220117291 | -0.5044544736 |
| H | -1.7305433864 | -1.3771085308 | -2.174030069  |
| C | -0.6307070469 | -3.1923216239 | -0.6010840609 |
| C | 0.0466608985  | -1.2472611967 | 0.7077945616  |
| C | 0.3640964945  | -2.1075630735 | 1.8074270483  |
| C | 0.1773997182  | -3.4682433777 | 1.7016067833  |
| C | -0.293971519  | -4.0065390742 | 0.4890059363  |
| H | 0.7770691879  | -0.4473297066 | 0.5956732387  |
| H | 0.7945826286  | -1.6743180877 | 2.7039276859  |
| H | -1.0697946741 | -3.6317173429 | -1.4900863361 |
| H | 0.4160252742  | -4.1276626208 | 2.5276250271  |
| H | -0.4349597048 | -5.0795918077 | 0.4072143681  |
| H | -1.7378024275 | 0.4955418458  | 2.6719864007  |
| H | -1.7378024275 | 0.4955418458  | 2.6719864007  |

TS 0007

E(RB3LYP) = -1097.26568447 A.U.

First frequency = -344.4282  $\text{cm}^{-1}$

|   |               |               |               |
|---|---------------|---------------|---------------|
| C | -1.9505333152 | 0.0939242525  | 0.9239796564  |
| C | -0.8035092787 | 1.0969598218  | 1.1625135162  |
| C | -2.5415479454 | -0.2201420234 | -0.4336225083 |
| C | -1.3874345192 | -0.8567961736 | -1.2430791797 |
| C | -0.4986347181 | 0.2038239592  | -1.9274605025 |
| N | 0.0696820451  | 1.5435584493  | 0.2398003305  |
| C | 0.490478395   | 1.0662228259  | -1.1055453022 |
| H | -1.1544543865 | 0.878013424   | -2.4756320311 |
| H | 0.0894685903  | -0.2987782584 | -2.6929149163 |
| C | 1.1058832595  | 2.4432341253  | 0.7984280623  |
| C | 2.2448352503  | 1.5552897184  | 1.2797819483  |
| H | 0.6708922016  | 3.0363174676  | 1.5974674481  |
| H | 1.4334426198  | 3.1068018878  | -0.0048116173 |
| C | 1.9264653353  | 0.5010502571  | -1.0119737508 |
| H | 0.5718443539  | 1.9930245837  | -1.6850853478 |
| C | 2.7132171723  | 0.6772063694  | 0.140887833   |
| H | 1.8985586925  | 0.9571961482  | 2.1311404629  |
| H | 3.0768834826  | 2.1687204356  | 1.6396347097  |
| C | 2.4961886852  | -0.1462701871 | -2.1173614645 |
| C | 3.7632061793  | -0.7191166848 | -2.0491255866 |
| C | 4.499493296   | -0.6339891697 | -0.8669611326 |
| C | 3.9787186145  | 0.0822498535  | 0.2064360074  |
| H | 4.5665059296  | 0.2066788915  | 1.1115444382  |
| H | 5.4821155092  | -1.0886411229 | -0.795605767  |
| H | 1.9497687011  | -0.2232204366 | -3.0506183813 |
| H | 4.1691618085  | -1.2304328066 | -2.9156801411 |
| C | -3.2751164296 | 0.9804035805  | -1.0905364039 |
| H | -3.3044476384 | -0.985808711  | -0.2531628661 |
| H | -2.5517622333 | 1.7853086606  | -1.2630161574 |
| C | -4.3924244341 | 1.5452216827  | -0.2024988614 |
| C | -3.864528528  | 0.5397508841  | -2.4398467928 |
| H | -4.58822575   | -0.2693413188 | -2.292425061  |
| H | -3.1062284218 | 0.1862470088  | -3.1429385849 |
| H | -4.3886289849 | 1.3766834188  | -2.9088968571 |

|   |               |               |               |
|---|---------------|---------------|---------------|
| H | -4.0130027975 | 1.9826922662  | 0.7220594192  |
| H | -5.1135194419 | 0.7657251903  | 0.0652415938  |
| H | -4.9286117449 | 2.3261218793  | -0.7491071506 |
| O | -2.8082210031 | 0.1965565389  | 1.9264650317  |
| O | -0.7941451668 | 1.5176897296  | 2.3342476513  |
| C | -0.5878420272 | -1.6846316793 | -0.2568694152 |
| H | -1.7966386756 | -1.4836243358 | -2.0407816835 |
| C | 0.6805077738  | -2.1904855457 | -0.4863257371 |
| C | -1.0971036353 | -1.668637907  | 1.0840104275  |
| C | -0.2335019868 | -1.9806624536 | 2.1771783756  |
| C | 1.0686615188  | -2.3629635257 | 1.9304048708  |
| C | 1.4990401141  | -2.5227490559 | 0.5993325771  |
| H | -2.1269276763 | -1.9847999337 | 1.2276096797  |
| H | -0.6314535004 | -1.9600307305 | 3.1859869927  |
| H | 1.0829171584  | -2.2453802357 | -1.4886204531 |
| H | 1.7441359244  | -2.591231284  | 2.7464790801  |
| H | 2.5121103817  | -2.8576914995 | 0.4047659141  |
| H | -2.3145207368 | 0.7389102554  | 2.6050352021  |
| H | -2.3145207368 | 0.7389102554  | 2.6050352021  |

TS 0010

E(RB3LYP) = -1097.26170450 A.U.

First frequency = -246.8834  $\text{cm}^{-1}$

|   |               |               |               |
|---|---------------|---------------|---------------|
| C | -1.6823468519 | -0.1616640072 | 0.9790520765  |
| C | -0.6591649915 | 0.9283912406  | 1.396889198   |
| C | -1.9813106239 | -0.4552184983 | -0.4980964779 |
| C | -0.7956308491 | -1.3577355621 | -0.9606545851 |
| C | 0.598383198   | -0.6804453094 | -1.078141116  |
| N | 0.5006613135  | 1.1276576598  | 0.733693729   |
| C | 0.7329575913  | 0.8158258296  | -0.7067772822 |
| H | 0.9079786561  | -0.7524578504 | -2.1214810633 |
| H | 1.3452795406  | -1.2447983014 | -0.5113101982 |
| C | 1.4989607434  | 1.9644690389  | 1.4349237053  |
| C | 2.8963747409  | 1.4174852217  | 1.1772172835  |
| H | 1.245389646   | 1.9449104175  | 2.4922101512  |
| H | 1.4237693566  | 3.0000008636  | 1.0852003676  |
| C | 2.1050015012  | 1.2798272461  | -1.1791268615 |

|   |               |               |               |
|---|---------------|---------------|---------------|
| H | 0.0029063289  | 1.3807087812  | -1.285920102  |
| C | 3.1753207633  | 1.4773897617  | -0.2997455208 |
| H | 2.9624045143  | 0.3917533168  | 1.5620763994  |
| H | 3.6260949661  | 2.0154669986  | 1.7303967334  |
| C | 2.3009952958  | 1.4483481836  | -2.5553361712 |
| C | 3.5562220322  | 1.7782729604  | -3.0587814352 |
| C | 4.6307506714  | 1.9517205385  | -2.1831160565 |
| C | 4.4328719182  | 1.8133939754  | -0.8115168492 |
| H | 5.2557947289  | 1.9787402153  | -0.1220646233 |
| H | 5.6116338176  | 2.2130414234  | -2.5669045354 |
| H | 1.4646358783  | 1.3231046729  | -3.237807114  |
| H | 3.6932260382  | 1.907138686   | -4.1274011745 |
| C | -2.4147893718 | 0.7841523749  | -1.3211299454 |
| H | -2.8524655972 | -1.1198895818 | -0.4744347378 |
| H | -1.8064716275 | 1.648077386   | -1.0301663447 |
| C | -3.8762207765 | 1.1453587979  | -1.0178592112 |
| C | -2.2262813965 | 0.5409570997  | -2.8243312149 |
| H | -2.8079726271 | -0.3274343962 | -3.1516687684 |
| H | -1.1807725908 | 0.3660230151  | -3.0933749052 |
| H | -2.5748094737 | 1.4089323916  | -3.3901043893 |
| H | -4.165328756  | 2.040068782   | -1.576444488  |
| H | -4.031960259  | 1.3365958425  | 0.0454643117  |
| H | -4.5436788998 | 0.3295004127  | -1.3169314653 |
| O | -2.7900366652 | -0.0123888848 | 1.7193199538  |
| O | -0.9378802285 | 1.4786638337  | 2.4712720327  |
| C | -0.8630123096 | -2.3432655814 | 0.1702741336  |
| H | -1.0454678534 | -1.8401686006 | -1.9056961398 |
| C | -1.3790901839 | -3.6217960001 | 0.0943173163  |
| C | -0.7224275944 | -1.6840878904 | 1.4505164708  |
| C | -1.140924251  | -2.388439842  | 2.638292723   |
| C | -1.6781917626 | -3.647476917  | 2.5414977575  |
| C | -1.7744200756 | -4.2654113891 | 1.2741466064  |
| H | 0.232939723   | -1.1783148884 | 1.5942004647  |
| H | -0.9989629977 | -1.9136997365 | 3.6035069829  |
| H | -1.5344883892 | -4.0997746892 | -0.8663687742 |
| H | -2.0040881595 | -4.1840893414 | 3.4244954165  |
| H | -2.1990728062 | -5.2624428011 | 1.2096681485  |
| H | -2.5168573903 | 0.5918791558  | 2.4551531646  |

H -2.5168573903 0.5918791558 2.4551531646

TS 0013

E(RB3LYP) = -1097.25965555 A.U.

First frequency = -358.2914  $\text{cm}^{-1}$

|   |               |               |               |
|---|---------------|---------------|---------------|
| C | -1.5162010112 | 0.0084919077  | 0.8048467796  |
| C | -0.7576234719 | 1.3545772261  | 0.9389420601  |
| C | -2.2298526731 | -0.4219592768 | -0.4738413779 |
| C | -1.1116395135 | -0.8345196588 | -1.4674347762 |
| C | -0.3688916783 | 0.3574156034  | -2.0839843562 |
| N | -0.0028129438 | 1.8900267371  | -0.0418728689 |
| C | 0.5648462166  | 1.2454776935  | -1.2530004944 |
| H | -1.1296289121 | 1.0061662798  | -2.5228644809 |
| H | 0.2230984088  | 0.0029745049  | -2.9296520284 |
| C | 0.8447207966  | 3.0314617091  | 0.3582175372  |
| C | 2.1554600953  | 2.479717905   | 0.9229754831  |
| H | 0.3128610275  | 3.6306027345  | 1.0931490398  |
| H | 1.0133257474  | 3.637655968   | -0.5338508827 |
| C | 1.9454168524  | 0.6787168834  | -0.8930435483 |
| H | 0.74750358    | 2.0938524117  | -1.9206047441 |
| C | 2.6922463731  | 1.3019128067  | 0.1274536943  |
| H | 1.9851764955  | 2.1614796812  | 1.9582012054  |
| H | 2.9048051363  | 3.2766488242  | 0.9638853099  |
| C | 2.4925247721  | -0.4156732882 | -1.5738412189 |
| C | 3.7533084284  | -0.9070151582 | -1.2457094554 |
| C | 4.4906595806  | -0.2992486277 | -0.2287171283 |
| C | 3.9583452876  | 0.7953252632  | 0.4458211549  |
| H | 4.5296461678  | 1.2737529857  | 1.2363843457  |
| H | 5.4734574648  | -0.6753943806 | 0.0360714046  |
| H | 1.93179179    | -0.9057875415 | -2.360639286  |
| H | 4.1541506762  | -1.7620639471 | -1.7799005511 |
| C | -3.3654218271 | 0.5157816534  | -0.980566148  |
| H | -2.7209708909 | -1.3576174848 | -0.1895032246 |
| H | -3.4408621478 | 0.3096648896  | -2.0568884834 |
| C | -3.1547210794 | 2.0276127276  | -0.8080458277 |
| C | -4.6974275554 | 0.1078618985  | -0.33230914   |
| H | -4.9290460292 | -0.9442684044 | -0.5243811663 |

|   |               |               |               |
|---|---------------|---------------|---------------|
| H | -5.5172506654 | 0.7137896007  | -0.7284884807 |
| H | -4.6600812333 | 0.2535762129  | 0.7517408389  |
| H | -3.1060285163 | 2.3062870754  | 0.2495811011  |
| H | -4.0098314279 | 2.5548492115  | -1.2395555003 |
| H | -2.2543056545 | 2.4008845312  | -1.2968844931 |
| O | -2.2487147894 | -0.1710535437 | 1.8995876951  |
| O | -0.9003670682 | 1.8930685768  | 2.0473028614  |
| C | -0.3576967959 | -1.7817366852 | -0.5677568546 |
| H | -1.5627702026 | -1.3899636282 | -2.2932590507 |
| C | -0.3927502403 | -3.1553380659 | -0.7158526203 |
| C | -0.0014790902 | -1.2084594336 | 0.7081274486  |
| C | 0.2585545529  | -2.0840143528 | 1.8134963266  |
| C | 0.1882333373  | -3.4500739994 | 1.6533637733  |
| C | -0.1058056686 | -3.9789388232 | 0.3821746166  |
| H | 0.721727607   | -0.3941902693 | 0.6784164562  |
| H | 0.5596044617  | -1.6507612032 | 2.761544264   |
| H | -0.7055358898 | -3.5973737921 | -1.6555773116 |
| H | 0.3865638948  | -4.1179746881 | 2.4831626198  |
| H | -0.1505249394 | -5.056115558  | 0.2565412516  |
| H | -1.9436406121 | 0.5418610449  | 2.5231316151  |
| H | -1.9436406121 | 0.5418610449  | 2.5231316151  |

TS 0019

E(RB3LYP) = -1097.25563500 A.U.

First frequency = -235.7391  $\text{cm}^{-1}$

|   |               |               |               |
|---|---------------|---------------|---------------|
| C | -1.5822664955 | -0.3290362357 | 1.0421669229  |
| C | -0.4955886003 | 0.6805684065  | 1.4780067887  |
| C | -2.0210389073 | -0.3680964397 | -0.4286122671 |
| C | -0.9534242952 | -1.2730525601 | -1.1026780309 |
| C | 0.483897273   | -0.7013134599 | -1.2110895815 |
| N | 0.5363324934  | 1.0700152287  | 0.6997535769  |
| C | 0.8243479864  | 0.7213445084  | -0.7407213027 |
| H | 0.7324606431  | -0.6948601614 | -2.272940582  |
| H | 1.1858473565  | -1.3997116957 | -0.7475137002 |
| C | 1.3274232414  | 2.1823033978  | 1.2967480429  |
| C | 1.8861541254  | 3.1017338555  | 0.2175966357  |
| H | 2.1444768801  | 1.7585792992  | 1.8894963811  |

|   |               |               |               |
|---|---------------|---------------|---------------|
| H | 0.6672287783  | 2.7215560588  | 1.9727074573  |
| C | 2.2921353594  | 1.0362579709  | -1.0663863727 |
| H | 0.2315233847  | 1.41799807    | -1.3429939603 |
| C | 2.7839495684  | 2.289093859   | -0.665253606  |
| H | 2.4311900844  | 3.9195349387  | 0.6951455578  |
| H | 1.0587606134  | 3.5507133447  | -0.3479225408 |
| C | 3.128923853   | 0.1891495426  | -1.8014444459 |
| C | 4.4237995309  | 0.5884291783  | -2.1394919995 |
| C | 4.9003116083  | 1.8372923396  | -1.7470580655 |
| C | 4.0787931091  | 2.6816174561  | -1.0006631348 |
| H | 4.443174099   | 3.6491378969  | -0.6680940283 |
| H | 5.9063304985  | 2.147835378   | -2.010154904  |
| H | 2.7975883429  | -0.7879184372 | -2.1270267376 |
| H | 5.0562232682  | -0.0837572854 | -2.7102095451 |
| C | -2.3655995533 | 1.0096832321  | -1.0403992661 |
| H | -2.9505318609 | -0.9488737124 | -0.4323804583 |
| H | -1.582986115  | 1.7306660839  | -0.7859770649 |
| C | -3.6827045391 | 1.5476403638  | -0.46254937   |
| C | -2.4499092894 | 0.9101215688  | -2.5695234239 |
| H | -3.1926569886 | 0.162964316   | -2.8702426727 |
| H | -1.4921875693 | 0.6363678042  | -3.0217134294 |
| H | -2.7535144403 | 1.8720502183  | -2.990965163  |
| H | -4.5127077973 | 0.8719313034  | -0.6967793485 |
| H | -3.909730025  | 2.5246257111  | -0.8985619734 |
| H | -3.6362880892 | 1.658502899   | 0.6225345312  |
| O | -2.6101474447 | -0.2427120145 | 1.9004262631  |
| O | -0.6560994636 | 1.0965238935  | 2.6373681731  |
| C | -1.0151771139 | -2.4029820648 | -0.1148074724 |
| H | -1.2976712647 | -1.5940017639 | -2.0853181074 |
| C | -1.669139111  | -3.6045425315 | -0.2998470352 |
| C | -0.6895628671 | -1.9398221546 | 1.2165195388  |
| C | -1.053544673  | -2.7678884613 | 2.3413580296  |
| C | -1.721552191  | -3.9494205828 | 2.1409483368  |
| C | -2.0081539159 | -4.3710347259 | 0.8226509214  |
| H | 0.3112336276  | -1.5221117679 | 1.3299012065  |
| H | -0.7695703634 | -2.4488009243 | 3.3386186724  |
| H | -1.9666574778 | -3.9263759415 | -1.2915501183 |
| H | -2.0081159937 | -4.5762795884 | 2.976824924   |



|   |               |               |              |
|---|---------------|---------------|--------------|
| H | -2.5360647565 | -5.3083334325 | 0.6767736892 |
| H | -2.2372892753 | 0.2498919323  | 2.6762713929 |
| H | -2.2372892753 | 0.2498919323  | 2.6762713929 |

### 3.1.4 Starting TS second run

TS Input 2

E(RB3LYP) = -1097.26674653 A.U.

First frequency = -271.4263  $\text{cm}^{-1}$

|   |               |               |               |
|---|---------------|---------------|---------------|
| C | -1.9555417974 | 0.0969958823  | 0.8724218198  |
| C | -0.5590570266 | 0.425980407   | 1.4774423002  |
| C | -2.293692451  | -0.0802637328 | -0.6209153265 |
| C | -1.2873849681 | -1.1587304731 | -1.1107792922 |
| C | 0.0619057399  | -0.5759487594 | -1.587498353  |
| N | 0.564798074   | 0.2238274957  | 0.7586433887  |
| C | 0.6200519698  | 0.5459209479  | -0.6888486695 |
| H | -0.0888685685 | -0.1638996889 | -2.5862572079 |
| H | 0.8018027242  | -1.3722586981 | -1.6936366624 |
| C | 1.8219308398  | -0.0044366132 | 1.4837282927  |
| C | 2.7733493958  | 1.1617671044  | 1.2747403392  |
| H | 2.2654603771  | -0.927805417  | 1.0953473174  |
| H | 1.5739800191  | -0.1490336651 | 2.5330242034  |
| C | 2.0068727579  | 1.0162506207  | -1.1246007047 |
| H | -0.021811212  | 1.4191367275  | -0.8069453666 |
| C | 3.0097325004  | 1.3555500824  | -0.2009652364 |
| H | 3.7188633834  | 0.9689121386  | 1.7900629055  |
| H | 2.3384167013  | 2.063390841   | 1.7240574629  |
| C | 2.2543857378  | 1.2021882677  | -2.4928351435 |
| C | 3.4742316094  | 1.7002645248  | -2.9421986705 |
| C | 4.4738904799  | 2.0238798807  | -2.0240850622 |
| C | 4.2351951065  | 1.8475164418  | -0.6648288532 |
| H | 5.0078885112  | 2.0909113035  | 0.0589703419  |
| H | 5.4301193924  | 2.4075042581  | -2.3649086807 |
| H | 1.4878475173  | 0.9704581473  | -3.2231294253 |
| H | 3.6405617635  | 1.8344954065  | -4.0060547509 |
| C | -2.4926852689 | 1.1691174074  | -1.5172426761 |
| H | -3.2859320566 | -0.5445184637 | -0.5995443416 |

|   |               |               |               |
|---|---------------|---------------|---------------|
| H | -1.5410413357 | 1.6749258187  | -1.6950920177 |
| C | -3.4487682078 | 2.192788051   | -0.8918646681 |
| C | -3.0293999912 | 0.7107783588  | -2.8833111954 |
| H | -3.1840781383 | 1.5770480288  | -3.532011392  |
| H | -3.992008126  | 0.1995976712  | -2.7711214879 |
| H | -2.3428896951 | 0.031463829   | -3.3959641978 |
| H | -3.6254670221 | 3.0066653044  | -1.6008069249 |
| H | -3.0488200489 | 2.6239090823  | 0.0274820979  |
| H | -4.415092445  | 1.7356079468  | -0.6546482958 |
| O | -2.9034144353 | 0.679267958   | 1.6091087573  |
| O | -0.5929910309 | 0.6929268884  | 2.6821650477  |
| C | -1.1041526937 | -2.074393561  | 0.0806124296  |
| H | -1.7160267535 | -1.7219443992 | -1.9459738001 |
| C | -0.0550616655 | -2.9594539344 | 0.2681692131  |
| C | -1.9693590981 | -1.7516922191 | 1.1900078657  |
| C | -1.6538858584 | -2.2584559434 | 2.4975349704  |
| C | -0.5645483656 | -3.0770692555 | 2.6726943746  |
| C | 0.2014115175  | -3.4576630386 | 1.5488573161  |
| H | -3.0388533387 | -1.7490364154 | 0.9873251237  |
| H | -2.3077684013 | -2.0101954119 | 3.3263883947  |
| H | 0.6099403779  | -3.2166220762 | -0.547594005  |
| H | -0.3081491359 | -3.4623643195 | 3.6523053461  |
| H | 1.0443231762  | -4.1266026839 | 1.6906310768  |
| H | -2.4556204483 | 0.930863907   | 2.4527247926  |
| H | -2.4556204483 | 0.930863907   | 2.4527247926  |

### 3.1.5 Lowest TS second run

TS 0001

E(RB3LYP) = -1097.27087472 A.U.

First frequency = -267.8252  $\text{cm}^{-1}$

|   |               |               |               |
|---|---------------|---------------|---------------|
| C | -2.0836006188 | -0.3341077353 | -0.6243661752 |
| C | -0.9508078341 | 0.4185967592  | -1.3790878952 |
| C | -1.904877784  | -1.3952618145 | 0.4755796422  |
| C | -1.0416647026 | -0.6820402693 | 1.5484634431  |
| C | 0.4777288988  | -0.7982144357 | 1.2963163994  |
| N | 0.3004825255  | 0.5132866271  | -0.8851276898 |

|   |               |               |               |
|---|---------------|---------------|---------------|
| C | 0.9457558691  | -0.6218717629 | -0.1672341915 |
| H | 0.8127448567  | -1.7900930933 | 1.6101665706  |
| H | 1.0096778441  | -0.0875382309 | 1.9319038205  |
| C | 1.1462825398  | 1.5649271012  | -1.4845271504 |
| C | 2.2670745391  | 1.9329506422  | -0.5196732892 |
| H | 0.4986824678  | 2.4155084141  | -1.694635798  |
| H | 1.5640145352  | 1.2161306378  | -2.4356706396 |
| C | 2.4591336059  | -0.5236687686 | -0.1713498524 |
| H | 0.6894154321  | -1.5211855427 | -0.7265184058 |
| C | 3.1085050902  | 0.7142199581  | -0.2515481424 |
| H | 1.8327239916  | 2.3300321555  | 0.4067381335  |
| H | 2.8718637655  | 2.7307840963  | -0.9586782572 |
| C | 3.2068381067  | -1.6941663959 | -0.0061140958 |
| C | 4.5947436926  | -1.6350314606 | 0.1001353451  |
| C | 5.2441139127  | -0.4004905246 | 0.0307976886  |
| C | 4.5019421915  | 0.7645184649  | -0.1552516144 |
| H | 5.004047257   | 1.7243971427  | -0.2358603695 |
| H | 6.325567763   | -0.3482900445 | 0.1049209979  |
| H | 2.7008202146  | -2.6546336999 | 0.0384298597  |
| H | 5.1668378966  | -2.5482238188 | 0.2272260489  |
| C | -1.4905876384 | -2.8334960963 | 0.0746863861  |
| H | -2.9141986582 | -1.5128745638 | 0.8862517071  |
| H | -0.4617966797 | -2.8472001673 | -0.2912317675 |
| C | -2.3813538707 | -3.4129393961 | -1.0315439076 |
| C | -1.5504193646 | -3.7289556302 | 1.3230494403  |
| H | -1.2732646836 | -4.7533005417 | 1.0601623612  |
| H | -2.565238036  | -3.7514718094 | 1.7356275593  |
| H | -0.8717602513 | -3.3940490027 | 2.1121150911  |
| H | -2.1022114085 | -4.4542297605 | -1.2162671544 |
| H | -2.2854081902 | -2.8634792863 | -1.9694208011 |
| H | -3.4360822066 | -3.3931098656 | -0.7378610469 |
| O | -3.0925001816 | -0.5532518293 | -1.4697791577 |
| O | -1.3511718454 | 1.0426547213  | -2.3687368614 |
| C | -1.4859205152 | 0.7643461739  | 1.4998871176  |
| H | -1.2409175937 | -1.1016813487 | 2.5395724026  |
| C | -0.7783159154 | 1.8439331654  | 2.0015393023  |
| C | -2.5875350272 | 0.99560279    | 0.5984104503  |
| C | -2.8528035606 | 2.3309878278  | 0.1390584129  |

|   |               |              |               |
|---|---------------|--------------|---------------|
| C | -2.089244875  | 3.378891503  | 0.5950522841  |
| C | -1.0862542313 | 3.1338291735 | 1.5575527495  |
| H | -3.4968887899 | 0.4269950834 | 0.7858643531  |
| H | -3.6834419799 | 2.4965141742 | -0.538303487  |
| H | 0.0547593523  | 1.6995019239 | 2.6793303305  |
| H | -2.2714452853 | 4.3909876942 | 0.2540209624  |
| H | -0.5048132658 | 3.969127108  | 1.9346914617  |
| H | -2.9147857483 | 0.0441112977 | -2.2378559266 |
| H | -2.9147857483 | 0.0441112977 | -2.2378559266 |

### 3.1.6 Additional TS second run

TS 0008

E(RB3LYP) = -1097.26568425 A.U.

First frequency = -344.4003  $\text{cm}^{-1}$

|   |               |               |               |
|---|---------------|---------------|---------------|
| C | -2.0839161403 | -0.2148949414 | -0.5259322842 |
| C | -0.9345126128 | 0.0305333902  | -1.5246143416 |
| C | -2.1440711695 | -1.3812651861 | 0.4369093641  |
| C | -0.9346573717 | -1.1918646766 | 1.3823920487  |
| C | 0.3614318049  | -1.7978218314 | 0.8025046559  |
| N | 0.3069745387  | -0.4861923652 | -1.4538702122 |
| C | 1.1087472648  | -1.1119128754 | -0.3673784306 |
| H | 0.1408320813  | -2.8212496747 | 0.5040899974  |
| H | 1.0779236097  | -1.8915885691 | 1.6162895377  |
| C | 1.2083800339  | 0.0019073613  | -2.5236419836 |
| C | 1.8392576821  | 1.2895319685  | -2.0123923406 |
| H | 0.6350836892  | 0.1492790402  | -3.4341584778 |
| H | 1.9635593614  | -0.7683364181 | -2.6946452646 |
| C | 2.2285914197  | -0.1344618835 | 0.0577737389  |
| H | 1.6138576857  | -1.9412708302 | -0.8757886644 |
| C | 2.5139029385  | 1.025915448   | -0.6846681754 |
| H | 1.0627678484  | 2.0585171914  | -1.9220483398 |
| H | 2.5741824024  | 1.662857979   | -2.7325377959 |
| C | 3.0310726607  | -0.4314349527 | 1.1683215892  |
| C | 4.0085459098  | 0.453697287   | 1.6146733956  |
| C | 4.2172935301  | 1.6551314132  | 0.9365470587  |
| C | 3.4862332446  | 1.9183451737  | -0.2178617811 |

|   |               |               |               |
|---|---------------|---------------|---------------|
| H | 3.6805277835  | 2.822152027   | -0.7884582507 |
| H | 4.9658089256  | 2.3604549668  | 1.282363917   |
| H | 2.8952129286  | -1.3597326908 | 1.7117081635  |
| H | 4.60051267    | 0.2042656149  | 2.4890417269  |
| C | -2.2755572631 | -2.7627478826 | -0.2596307698 |
| H | -3.0640329905 | -1.2391601461 | 1.0151037107  |
| H | -1.3856320483 | -2.9342596975 | -0.8756561482 |
| C | -3.4993608497 | -2.8427563082 | -1.1826208237 |
| C | -2.3647449152 | -3.8644246616 | 0.8083599463  |
| H | -3.2458089556 | -3.7102030453 | 1.4408511421  |
| H | -1.4878310962 | -3.9010472207 | 1.4595134949  |
| H | -2.4637456558 | -4.8417058424 | 0.3284998065  |
| H | -4.4193725784 | -2.6091251231 | -0.6364766078 |
| H | -3.5901356451 | -3.8594990517 | -1.5751482779 |
| H | -3.4306337675 | -2.1602469662 | -2.0309089153 |
| O | -3.2223702603 | 0.1204567364  | -1.1112766897 |
| O | -1.2964882262 | 0.7430022352  | -2.4792986234 |
| C | -0.7927322457 | 0.3027202695  | 1.5904931476  |
| H | -1.1223004215 | -1.7041492144 | 2.3305696918  |
| C | 0.3181547985  | 0.9295593843  | 2.1292335154  |
| C | -1.7730482978 | 1.0946550282  | 0.9053577513  |
| C | -1.5029491816 | 2.4658323094  | 0.6135865876  |
| C | -0.3279333437 | 3.0385104975  | 1.054101443   |
| C | 0.5465430506  | 2.2838049476  | 1.8592287167  |
| H | -2.8178842045 | 0.8833842633  | 1.1170238921  |
| H | -2.2517974454 | 3.0510463553  | 0.0908662458  |
| H | 1.0608933469  | 0.366915221   | 2.6781546655  |
| H | -0.0978371331 | 4.0739108308  | 0.8319513326  |
| H | 1.4534717327  | 2.7444163442  | 2.2356170154  |
| H | -2.9307524316 | 0.6178841334  | -1.9272861425 |
| H | -2.9307524316 | 0.6178841334  | -1.9272861425 |

TS 0011

E(RB3LYP) = -1097.26674646 A.U.

First frequency = -271.2808  $\text{cm}^{-1}$

|   |               |               |               |
|---|---------------|---------------|---------------|
| C | -1.9890951077 | -0.2875464293 | -0.716252485  |
| C | -0.8286720224 | 0.5767009435  | -1.2915402576 |

|   |               |               |               |
|---|---------------|---------------|---------------|
| C | -1.8711715524 | -1.3977210606 | 0.346528143   |
| C | -1.1461935805 | -0.707222637  | 1.5353811571  |
| C | 0.3948512834  | -0.7700739308 | 1.4420771648  |
| N | 0.3451504631  | 0.6745134747  | -0.6333907271 |
| C | 0.9551037885  | -0.5042492849 | 0.0303035182  |
| H | 0.7052052444  | -1.7711563762 | 1.7446637902  |
| H | 0.8458634316  | -0.0802944181 | 2.1587414868  |
| C | 1.1703381179  | 1.8690729155  | -0.8576698643 |
| C | 2.4497983252  | 1.4994418133  | -1.5892853593 |
| H | 1.4063017359  | 2.2975597588  | 0.1225735333  |
| H | 0.5692982095  | 2.5829308774  | -1.4167474556 |
| C | 2.482017471   | -0.4597568386 | 0.0000839162  |
| H | 0.6869299581  | -1.3518237198 | -0.6006802242 |
| C | 3.1914400278  | 0.4511183408  | -0.8005343894 |
| H | 3.0734803792  | 2.3882548687  | -1.7226136369 |
| H | 2.1954336039  | 1.1299059239  | -2.5906459873 |
| C | 3.1969907914  | -1.4227397877 | 0.7276651884  |
| C | 4.5871654215  | -1.4767612834 | 0.6773785571  |
| C | 5.2906349791  | -0.5625812282 | -0.107720732  |
| C | 4.589378401   | 0.3926584347  | -0.8367050791 |
| H | 5.1265515419  | 1.1129975769  | -1.4472287482 |
| H | 6.3746398459  | -0.5930654424 | -0.1490361527 |
| H | 2.6709932197  | -2.1513519572 | 1.3335265421  |
| H | 5.1164879484  | -2.2313535819 | 1.2499880369  |
| C | -1.3784802064 | -2.8084462603 | -0.067144138  |
| H | -2.9105936502 | -1.5650428643 | 0.6500640227  |
| H | -0.3128669321 | -2.7928320692 | -0.3065913693 |
| C | -2.1189431952 | -3.3507885532 | -1.2962539295 |
| C | -1.5655135602 | -3.7612386099 | 1.1251313264  |
| H | -1.2301167539 | -4.7659839282 | 0.8546544362  |
| H | -2.6216990915 | -3.8253932517 | 1.4095098321  |
| H | -0.9964307526 | -3.4476676622 | 2.0045507003  |
| H | -1.7999188699 | -4.3789736057 | -1.4893264833 |
| H | -1.9209398362 | -2.7597726313 | -2.1920908909 |
| H | -3.2016096844 | -3.3581276255 | -1.1323822786 |
| O | -2.8935406583 | -0.5042624975 | -1.6729537767 |
| O | -1.1604377972 | 1.268775236   | -2.2583526886 |
| C | -1.6441372809 | 0.7219318307  | 1.5037686384  |

|   |               |               |               |
|---|---------------|---------------|---------------|
| H | -1.4382159002 | -1.1784627875 | 2.4793831582  |
| C | -1.0368719644 | 1.8050331553  | 2.117946415   |
| C | -2.673276335  | 0.948658469   | 0.5173820933  |
| C | -2.9633783931 | 2.2934710797  | 0.1010971194  |
| C | -2.2955882489 | 3.3489816896  | 0.6732947013  |
| C | -1.3687143729 | 3.1000744248  | 1.7093949755  |
| H | -3.5664700461 | 0.3315189188  | 0.5964346865  |
| H | -3.7366879269 | 2.4555927723  | -0.641800903  |
| H | -0.2604519843 | 1.661975296   | 2.8599246627  |
| H | -2.4967038491 | 4.3684610751  | 0.3666318353  |
| H | -0.8649517678 | 3.9407741156  | 2.175791586   |
| H | -2.6832971784 | 0.15283883    | -2.3797032782 |
| H | -2.6832971784 | 0.15283883    | -2.3797032782 |

## 3.2 Minor diastereoisomer

### 3.2.1 Starting TS

TS Input

E(RB3LYP) = -1097.25381744 A.U.

First frequency = -264.4836  $\text{cm}^{-1}$

|   |               |               |               |
|---|---------------|---------------|---------------|
| C | -1.4661628778 | -0.4432234621 | 0.8328755163  |
| C | -0.3902180866 | -1.5405317877 | 0.6872752465  |
| C | -1.0326392423 | 1.0214838022  | 0.6795574406  |
| C | -1.0869016513 | 1.270218175   | -0.8554860936 |
| C | -0.0653463068 | 0.5181375708  | -1.7578151515 |
| N | 0.6245001723  | -1.4849703496 | -0.1911841163 |
| C | 0.9949551461  | -0.4738048289 | -1.2366292166 |
| H | 0.5045321471  | 1.2600414031  | -2.3181812054 |
| H | -0.6380192165 | -0.0119956606 | -2.5219240176 |
| C | 1.6115062071  | -2.5874885496 | -0.0241960844 |
| C | 2.9471778386  | -2.2858650901 | -0.71287218   |
| H | 1.1750735411  | -3.5168166228 | -0.402205524  |
| H | 1.764238318   | -2.7112991324 | 1.0486055616  |
| C | 2.3513448162  | 0.1118608491  | -0.8599779988 |
| H | 1.1871190827  | -1.100140819  | -2.1163120844 |
| C | 3.3405431743  | -0.8413000183 | -0.5640947164 |

|   |               |               |               |
|---|---------------|---------------|---------------|
| H | 2.8772283212  | -2.5297287132 | -1.7810571067 |
| H | 3.7058590386  | -2.9507804968 | -0.2936362746 |
| C | 2.6715742627  | 1.4691341434  | -0.8394679711 |
| C | 3.9569345967  | 1.8816568404  | -0.4830722276 |
| C | 4.9286763571  | 0.9368320103  | -0.1542515543 |
| C | 4.6202884815  | -0.4238997979 | -0.2001173875 |
| H | 5.3777932386  | -1.1650482326 | 0.0371375333  |
| H | 5.926169921   | 1.2572170164  | 0.1287284323  |
| H | 1.9284005429  | 2.217473871   | -1.0872749448 |
| H | 4.1932298093  | 2.9403831366  | -0.4594738281 |
| C | 0.2338165543  | 1.4097758948  | 1.4674192164  |
| H | -1.8587885048 | 1.5992964875  | 1.1112151556  |
| H | 1.098614433   | 0.9105313135  | 1.0308586069  |
| C | 0.1505415664  | 0.9876047294  | 2.9425652588  |
| C | 0.4525451957  | 2.9258378473  | 1.3688486492  |
| H | 1.3815456884  | 3.2035925125  | 1.8738706253  |
| H | -0.3702211324 | 3.4662483319  | 1.8498678424  |
| H | 0.5224312981  | 3.2742474202  | 0.335234072   |
| H | 0.123302894   | -0.0973873043 | 3.0646490466  |
| H | -0.7408351554 | 1.4024196297  | 3.424111166   |
| H | 1.0299382944  | 1.359618735   | 3.4759672396  |
| O | -2.1705014967 | -0.6783173244 | 1.9461934009  |
| O | -0.5297482712 | -2.4868984128 | 1.4809283356  |
| C | -2.4669303866 | 0.7115273173  | -1.077373191  |
| H | -1.0558418235 | 2.3385263362  | -1.0686911357 |
| C | -3.6240691253 | 1.4487774576  | -1.2309430474 |
| C | -2.5300497851 | -0.6797448502 | -0.6886500696 |
| C | -3.8241540425 | -1.2797439596 | -0.4846285    |
| C | -4.9640354023 | -0.5268823871 | -0.6209888099 |
| C | -4.859905969  | 0.8265667749  | -1.0119526602 |
| H | -1.84340718   | -1.3497178664 | -1.2044264994 |
| H | -3.8797010535 | -2.3360973009 | -0.2445233967 |
| H | -3.5788001592 | 2.5065496492  | -1.4646918132 |
| H | -5.9424004994 | -0.9639696804 | -0.4611019728 |
| H | -5.7677540849 | 1.4119069084  | -1.1196868816 |
| H | -1.9223294841 | -1.604065516  | 2.2027863152  |
| H | -1.9223294841 | -1.604065516  | 2.2027863152  |



### 3.2.2 Lowest TS

TS 0001

E(RB3LYP) = -1097.26850154 A.U.

First frequency = -359.8195 cm<sup>-1</sup>

|   |               |               |               |
|---|---------------|---------------|---------------|
| C | -2.1599452051 | 0.3500156509  | 0.4833362024  |
| C | -0.9782708916 | 0.6818519429  | 1.4317297095  |
| C | -2.0910468322 | 0.7031564172  | -0.997368829  |
| C | -1.1346625507 | -0.3121773885 | -1.6561453288 |
| C | 0.3610073615  | 0.0269961997  | -1.4326499497 |
| N | 0.3046981437  | 0.7256524085  | 1.0219064718  |
| C | 0.8878275855  | -0.1906935433 | 0.0022102061  |
| H | 0.5752539504  | 1.0473271012  | -1.755235576  |
| H | 0.950606736   | -0.6263510831 | -2.0783843821 |
| C | 1.2249806778  | 1.4527500064  | 1.9234339118  |
| C | 2.3475262749  | 2.0822458624  | 1.1096343407  |
| H | 1.6322571114  | 0.7642721936  | 2.6725767969  |
| H | 0.6342742373  | 2.2043144626  | 2.4432336248  |
| C | 2.4067059583  | -0.1263621324 | -0.0330595273 |
| H | 0.6253522171  | -1.2042044957 | 0.3148103011  |
| C | 3.116341944   | 0.9939347043  | 0.4118020668  |
| H | 3.0013883581  | 2.6469584472  | 1.779790865   |
| H | 1.9212511561  | 2.798501614   | 0.3958220063  |
| C | 3.0975935503  | -1.2088787677 | -0.5905543861 |
| C | 4.4820600626  | -1.1678906245 | -0.7320541432 |
| C | 5.1896637063  | -0.0405958284 | -0.3077750347 |
| C | 4.5072217158  | 1.0268667385  | 0.2710434382  |
| H | 5.0537152852  | 1.8944350537  | 0.6294344978  |
| H | 6.2691918644  | -0.0025524888 | -0.4117453722 |
| H | 2.5497090605  | -2.0900733772 | -0.9130207395 |
| H | 5.0067040856  | -2.0135769402 | -1.1643194967 |
| C | -1.7656640277 | 2.2006061208  | -1.2534856498 |
| H | -3.1019589578 | 0.5277231444  | -1.3833938487 |
| H | -0.7613580133 | 2.4093398626  | -0.8707529968 |
| C | -2.7413822705 | 3.1441636161  | -0.5377776339 |
| C | -1.7781831711 | 2.4733942037  | -2.7646336495 |
| H | -1.5714467861 | 3.5301264467  | -2.9541277118 |
| H | -2.7601063682 | 2.2410971417  | -3.1910827016 |

|   |               |               |               |
|---|---------------|---------------|---------------|
| H | -1.0289005715 | 1.886939062   | -3.3025901165 |
| H | -3.7776527118 | 2.92752112    | -0.8175584229 |
| H | -2.523694651  | 4.1770029471  | -0.8236927284 |
| H | -2.6661979055 | 3.0775474686  | 0.54928486    |
| O | -3.2834065356 | 0.6865881436  | 1.1035341855  |
| O | -1.3484305526 | 1.0818773155  | 2.5465237316  |
| C | -1.4069102534 | -1.644994265  | -1.0002133067 |
| H | -1.3032052184 | -0.3558325835 | -2.7353255754 |
| C | -0.652176374  | -2.7949522865 | -1.1935461493 |
| C | -2.3249908905 | -1.5888421975 | 0.0995067778  |
| C | -2.3121011197 | -2.6194139998 | 1.0896314142  |
| C | -1.4830088064 | -3.709784255  | 0.9272408049  |
| C | -0.7032702954 | -3.8186055976 | -0.2418899932 |
| H | -3.327694197  | -1.2376773034 | -0.1337873385 |
| H | -3.0089556655 | -2.5634984608 | 1.9190820393  |
| H | 0.0309655496  | -2.8736875489 | -2.0322469378 |
| H | -1.4635984371 | -4.5055147128 | 1.6626548508  |
| H | -0.0870267427 | -4.700260433  | -0.3851718086 |
| H | -2.9977348397 | 0.8877778579  | 2.0377586594  |
| H | -2.9977348397 | 0.8877778579  | 2.0377586594  |

### 3.2.3 Additional TS

TS 0004

E(RB3LYP) = -1097.26548745 A.U.

First frequency = -283.7786  $\text{cm}^{-1}$

|   |               |               |               |
|---|---------------|---------------|---------------|
| C | -1.9850789449 | 0.4627044723  | 0.3061647976  |
| C | -0.7982743543 | 0.2850346961  | 1.2807910484  |
| C | -1.8009296368 | 0.6573317293  | -1.1878110872 |
| C | -1.162062694  | -0.6699508409 | -1.6764833192 |
| C | 0.3698119895  | -0.6248723829 | -1.6403262739 |
| N | 0.3628208072  | -0.3273770448 | 0.9871437365  |
| C | 1.0975323866  | -0.6526601149 | -0.2709278285 |
| H | 0.6825762228  | 0.255257249   | -2.1955353315 |
| H | 0.752296073   | -1.4784765842 | -2.2044569529 |
| C | 1.2685475608  | -0.5075971135 | 2.1441511584  |
| C | 2.2437722506  | 0.6580695814  | 2.1710552846  |

|   |               |               |               |
|---|---------------|---------------|---------------|
| H | 1.7951287689  | -1.4544538911 | 1.9974212748  |
| H | 0.6723109621  | -0.5690772345 | 3.0502454814  |
| C | 2.3981759089  | 0.1732955727  | -0.3208317802 |
| H | 1.3859791897  | -1.6966424833 | -0.1074603316 |
| C | 2.9221071455  | 0.7970074305  | 0.8267052302  |
| H | 2.9924728011  | 0.5023908864  | 2.954173167   |
| H | 1.6987292262  | 1.5739096888  | 2.4295113008  |
| C | 3.1149510982  | 0.2624152077  | -1.523784639  |
| C | 4.3001456541  | 0.988873918   | -1.6070099907 |
| C | 4.794880824   | 1.6412836074  | -0.478107309  |
| C | 4.1078636643  | 1.5339278953  | 0.7269306456  |
| H | 4.4973811227  | 2.018063112   | 1.6181771648  |
| H | 5.7146536349  | 2.2146663867  | -0.5325042509 |
| H | 2.7579505334  | -0.244025685  | -2.4125761542 |
| H | 4.8315423698  | 1.0429188906  | -2.5515523767 |
| C | -1.059455993  | 1.9651740998  | -1.5676145418 |
| H | -2.811730496  | 0.7377011636  | -1.6021642922 |
| H | -0.0280172557 | 1.90670952    | -1.2006555959 |
| C | -1.6962281233 | 3.2166226396  | -0.9470877753 |
| C | -1.0363297142 | 2.1078583728  | -3.0981061114 |
| H | -2.0572333098 | 2.1956917203  | -3.4852224337 |
| H | -0.5617105073 | 1.2608977402  | -3.6000741609 |
| H | -0.4903424655 | 3.0115321644  | -3.3815462963 |
| H | -1.1902881832 | 4.1063704974  | -1.3324934028 |
| H | -1.6172541632 | 3.231371803   | 0.1410034291  |
| H | -2.7566994044 | 3.2910662557  | -1.2087070699 |
| O | -2.8997738466 | 1.2317417077  | 0.8850702598  |
| O | -1.0688115251 | 0.6820745353  | 2.4281657575  |
| C | -1.6930437819 | -1.7449499806 | -0.7517889006 |
| H | -1.4544469954 | -0.8648755888 | -2.7130572444 |
| C | -1.0653658451 | -2.9542747929 | -0.5009655721 |
| C | -2.7204962855 | -1.2858449563 | 0.1416602725  |
| C | -3.0037408097 | -2.0245712587 | 1.3347126213  |
| C | -2.3067217077 | -3.1807144638 | 1.6067469416  |
| C | -1.3745723778 | -3.6617664245 | 0.6657978328  |
| H | -3.5889170102 | -0.8074898973 | -0.305978995  |
| H | -3.7879879166 | -1.67393388   | 1.996728681   |
| H | -0.2822653156 | -3.3195198871 | -1.1555833066 |

|   |               |               |              |
|---|---------------|---------------|--------------|
| H | -2.494441099  | -3.7425002742 | 2.5140699599 |
| H | -0.8470374297 | -4.5873458131 | 0.8724981894 |
| H | -2.600676128  | 1.2850764698  | 1.8344601261 |
| H | -2.600676128  | 1.2850764698  | 1.8344601261 |

TS 0007

E(RB3LYP) = -1097.26343415 A.U.

First frequency = -357.3603 cm<sup>-1</sup>

|   |               |               |               |
|---|---------------|---------------|---------------|
| C | -2.1726737447 | 0.377972946   | 0.2956276434  |
| C | -1.0299335895 | 0.6894661375  | 1.3033145047  |
| C | -2.0792854584 | 0.6187820005  | -1.2045109457 |
| C | -1.0579170681 | -0.3875623239 | -1.7494494287 |
| C | 0.4147319055  | 0.0031121971  | -1.4655349612 |
| N | 0.2815821459  | 0.6683296788  | 0.9957732629  |
| C | 0.9081253112  | -0.2192846772 | -0.0193162565 |
| H | 0.5918078702  | 1.0372307961  | -1.7679102896 |
| H | 1.0498483831  | -0.6154094742 | -2.101963042  |
| C | 1.1664528643  | 1.3219599452  | 1.9858299498  |
| C | 2.3309306163  | 1.9952974225  | 1.2726197694  |
| H | 1.5331173557  | 0.5760229637  | 2.7001635366  |
| H | 0.5602283581  | 2.0414274196  | 2.5307973953  |
| C | 2.4281580311  | -0.1329805436 | -0.0137191846 |
| H | 0.6585191219  | -1.2420766427 | 0.2732905344  |
| C | 3.1196482566  | 0.9567007629  | 0.5246833803  |
| H | 2.9606172773  | 2.4950574861  | 2.0140168197  |
| H | 1.94938783    | 2.774152107   | 0.6008547257  |
| C | 3.1434883703  | -1.175433402  | -0.6168085618 |
| C | 4.5307896572  | -1.1209718016 | -0.7148939705 |
| C | 5.2198152249  | -0.0200638044 | -0.2001072074 |
| C | 4.5141501033  | 1.0042075733  | 0.42577547    |
| H | 5.0444357866  | 1.8487408831  | 0.8562837664  |
| H | 6.3016493406  | 0.0288528356  | -0.269784072  |
| H | 2.6126370442  | -2.0385756987 | -1.0085770132 |
| H | 5.0718384307  | -1.936274121  | -1.183766984  |
| C | -1.9342771272 | 2.1113990274  | -1.6462494708 |
| H | -3.0552023708 | 0.3003989153  | -1.5849622445 |
| H | -1.4116471484 | 2.0798593163  | -2.6104892536 |

|   |               |               |               |
|---|---------------|---------------|---------------|
| C | -1.139903071  | 3.0337388396  | -0.710932016  |
| C | -3.3303992877 | 2.7056081036  | -1.8861261235 |
| H | -3.91067266   | 2.7157026464  | -0.9582582539 |
| H | -3.8876483171 | 2.1267409057  | -2.6291307018 |
| H | -3.2503744455 | 3.7346282657  | -2.2479469087 |
| H | -1.1150297698 | 4.0393299095  | -1.1389594767 |
| H | -0.109367097  | 2.7118927399  | -0.5629528501 |
| H | -1.6159556542 | 3.1122109304  | 0.2717862941  |
| O | -3.309984576  | 0.7965572383  | 0.8429520194  |
| O | -1.4569497984 | 1.0968063108  | 2.3961339566  |
| C | -1.350724165  | -1.685771185  | -1.034985231  |
| H | -1.1661160372 | -0.4832912779 | -2.8337543935 |
| C | -0.6043380648 | -2.850135111  | -1.1500135527 |
| C | -2.2926498243 | -1.5571256637 | 0.046120135   |
| C | -2.2951950567 | -2.5293427283 | 1.0965475007  |
| C | -1.4731364786 | -3.6330275576 | 1.0091844238  |
| C | -0.6802458893 | -3.8172870895 | -0.1415756321 |
| H | -3.3028105239 | -1.2644233732 | -0.2358421742 |
| H | -3.0051349063 | -2.4221267319 | 1.9096932872  |
| H | 0.0925749499  | -2.980002114  | -1.971001818  |
| H | -1.4710097602 | -4.3849683384 | 1.7894753796  |
| H | -0.0719541767 | -4.712077222  | -0.2245172242 |
| H | -3.0613921481 | 1.008493346   | 1.7859842722  |
| H | -3.0613921481 | 1.008493346   | 1.7859842722  |

TS 0011

E(RB3LYP) = -1097.26352565 A.U.

First frequency = -303.4854  $\text{cm}^{-1}$

|   |               |               |               |
|---|---------------|---------------|---------------|
| C | -2.1282113272 | 0.4865943569  | 0.3313822332  |
| C | -0.8918866606 | 0.556550865   | 1.2703480418  |
| C | -2.057510974  | 0.6748856419  | -1.1746799396 |
| C | -1.2082047438 | -0.5168760312 | -1.674235275  |
| C | 0.3007481642  | -0.2152298994 | -1.5953594593 |
| N | 0.3691907595  | 0.1860814519  | 0.9910396462  |
| C | 1.0245436597  | -0.3501166974 | -0.2533272167 |
| H | 0.4583400196  | 0.7803638454  | -2.0014872636 |
| H | 0.830219883   | -0.8997127339 | -2.2631500432 |

|   |               |               |               |
|---|---------------|---------------|---------------|
| C | 1.2260367159  | 0.1844510813  | 2.2164978115  |
| C | 2.5539605614  | -0.532398786  | 1.9992705352  |
| H | 0.6524428285  | -0.2846343823 | 3.017188915   |
| H | 1.404136082   | 1.2236621514  | 2.5064098016  |
| C | 2.4483073756  | 0.2030422728  | -0.3450654125 |
| H | 1.1259955626  | -1.421632539  | -0.0512553688 |
| C | 3.2424163913  | 0.0522215903  | 0.8024657542  |
| H | 2.3790033118  | -1.6079952316 | 1.863297982   |
| H | 3.1561037078  | -0.4205720797 | 2.9039893055  |
| C | 3.0080191037  | 0.7750837368  | -1.4906931361 |
| C | 4.3398174411  | 1.1969342686  | -1.487114349  |
| C | 5.1212222324  | 1.0523757595  | -0.3420877259 |
| C | 4.5677791003  | 0.4825685604  | 0.8051985065  |
| H | 5.1640451187  | 0.3710822169  | 1.7060259288  |
| H | 6.1546712656  | 1.3836824646  | -0.3404295819 |
| H | 2.4325358001  | 0.8945382141  | -2.399921131  |
| H | 4.7615928832  | 1.6399141559  | -2.3834159875 |
| C | -1.6105415812 | 2.0927185507  | -1.6160130579 |
| H | -3.0838620531 | 0.5487044541  | -1.5379355488 |
| H | -0.6069727941 | 2.2891935235  | -1.221071552  |
| C | -2.5379312202 | 3.193820068   | -1.0829308171 |
| C | -1.565321077  | 2.1599188149  | -3.1511757644 |
| H | -0.8658089086 | 1.444475455   | -3.5907050587 |
| H | -1.2630998743 | 3.1602353002  | -3.4722135898 |
| H | -2.55749208   | 1.9584616755  | -3.5695911468 |
| H | -2.2282261865 | 4.1582894934  | -1.495350858  |
| H | -2.5158098893 | 3.2694545799  | 0.0047368054  |
| H | -3.5746205756 | 3.0145932405  | -1.3869491707 |
| O | -3.1376293557 | 1.0962213343  | 0.9409202925  |
| O | -1.2054156258 | 0.9611901206  | 2.4070073749  |
| C | -1.5639483485 | -1.6792416037 | -0.774370148  |
| H | -1.4422656948 | -0.7381065353 | -2.7192477926 |
| C | -0.818550969  | -2.8402643552 | -0.640106919  |
| C | -2.5650924846 | -1.3678196293 | 0.2091565085  |
| C | -2.6801415312 | -2.1770359598 | 1.383924609   |
| C | -1.8664662936 | -3.2783476356 | 1.5384052833  |
| C | -0.9783458832 | -3.631788506  | 0.5032744514  |
| H | -3.5229601981 | -1.0129431719 | -0.1660037943 |

|   |               |               |               |
|---|---------------|---------------|---------------|
| H | -3.4429492943 | -1.9358179682 | 2.1162169325  |
| H | -0.0646688617 | -3.1017512284 | -1.3746600625 |
| H | -1.9342722137 | -3.8993862908 | 2.4237768972  |
| H | -0.365403267  | -4.5203502983 | 0.6149385884  |
| H | -2.7942194113 | 1.2371679721  | 1.8705762579  |
| H | -2.7942194113 | 1.2371679721  | 1.8705762579  |

TS 0013

E(RB3LYP) = -1097.26352559 A.U.

First frequency = -303.4729  $\text{cm}^{-1}$

|   |               |               |               |
|---|---------------|---------------|---------------|
| C | -2.1338024845 | 0.5460765467  | 0.3545324098  |
| C | -0.8801409699 | 0.6678933287  | 1.2647621965  |
| C | -2.0913537624 | 0.6492195582  | -1.1607961247 |
| C | -1.2511840806 | -0.5694157239 | -1.6082604992 |
| C | 0.2588878243  | -0.2649330264 | -1.5748054376 |
| N | 0.3756319124  | 0.2814607694  | 0.9831579357  |
| C | 1.0077641869  | -0.3244340207 | -0.2410929884 |
| H | 0.4085251772  | 0.7060316372  | -2.039368628  |
| H | 0.7759579337  | -0.9864074024 | -2.2127053803 |
| C | 1.2553196374  | 0.3483391862  | 2.1904696762  |
| C | 2.579198937   | -0.3805286077 | 1.9891562699  |
| H | 0.6970211433  | -0.0744434133 | 3.0269571988  |
| H | 1.4384471007  | 1.4021219949  | 2.4179207689  |
| C | 2.429345637   | 0.2217234625  | -0.3905088941 |
| H | 1.1134065692  | -1.3829280285 | 0.0190968381  |
| C | 3.2448813508  | 0.1352536049  | 0.7486208229  |
| H | 2.4021307974  | -1.4619600862 | 1.9173289005  |
| H | 3.1981481292  | -0.2183000202 | 2.8746959786  |
| C | 2.9672818091  | 0.7279129242  | -1.5768339854 |
| C | 4.2987575435  | 1.1483815424  | -1.6219784893 |
| C | 5.1015378754  | 1.0680344477  | -0.4854644745 |
| C | 4.5699041512  | 0.5641562672  | 0.7022718524  |
| H | 5.1829900299  | 0.5031894952  | 1.5966217621  |
| H | 6.1347142299  | 1.3981974685  | -0.5218363409 |
| H | 2.3748194865  | 0.7963377059  | -2.4804110852 |
| H | 4.7034979692  | 1.5398639626  | -2.5495607306 |
| C | -1.6531472264 | 2.0396265843  | -1.689530958  |

|   |               |               |               |
|---|---------------|---------------|---------------|
| H | -3.1242840133 | 0.5035643426  | -1.4971173735 |
| H | -0.6423828582 | 2.2572177351  | -1.3251989161 |
| C | -2.5706485745 | 3.1697122786  | -1.2019312666 |
| C | -1.6368105094 | 2.0202994438  | -3.2266201036 |
| H | -2.6366009878 | 1.7963301743  | -3.6143261298 |
| H | -0.9454397432 | 1.2807508421  | -3.6382500288 |
| H | -1.3410103906 | 3.0007451516  | -3.609064973  |
| H | -2.5281215532 | 3.3064105351  | -0.120850417  |
| H | -3.6128202579 | 2.9744886155  | -1.4758671288 |
| H | -2.2690004912 | 4.1092040403  | -1.6737073003 |
| O | -3.131845793  | 1.1897863717  | 0.9475392255  |
| O | -1.1724731258 | 1.1360893707  | 2.3825090086  |
| C | -1.5896192706 | -1.6789988102 | -0.6378446229 |
| H | -1.5047390185 | -0.8489671502 | -2.6345856099 |
| C | -0.8414270688 | -2.8311293179 | -0.4523290609 |
| C | -2.5722824449 | -1.3119563673 | 0.3451354742  |
| C | -2.6649966254 | -2.0535729505 | 1.565606826   |
| C | -1.8481382479 | -3.1449594824 | 1.7666816076  |
| C | -0.9794568159 | -3.5568115073 | 0.7366614278  |
| H | -3.5371216051 | -0.9780872113 | -0.0314331782 |
| H | -3.4140334266 | -1.7709221733 | 2.2972940066  |
| H | -0.1013610433 | -3.1341551166 | -1.1849650053 |
| H | -1.8990895974 | -3.7150355713 | 2.6867830127  |
| H | -0.3641921586 | -4.4380803184 | 0.8867430657  |
| H | -2.7711648657 | 1.3825879196  | 1.8612037345  |
| H | -2.7711648657 | 1.3825879196  | 1.8612037345  |

TS 0014

E(RB3LYP) = -1097.26236574 A.U.

First frequency = -287.0972  $\text{cm}^{-1}$

|   |               |               |               |
|---|---------------|---------------|---------------|
| C | -2.1271148486 | 0.4664936956  | 0.1351888569  |
| C | -0.9339827885 | 0.5294200654  | 1.1263636305  |
| C | -2.0088094602 | 0.5358406996  | -1.3747495796 |
| C | -1.150362689  | -0.687306329  | -1.7565734848 |
| C | 0.3535657165  | -0.3803287369 | -1.6672357847 |
| N | 0.3202888042  | 0.0970371558  | 0.9157507403  |
| C | 1.0409139173  | -0.4268632026 | -0.2981686218 |



|   |               |               |               |
|---|---------------|---------------|---------------|
| H | 0.5034321498  | 0.586712795   | -2.141104969  |
| H | 0.9064616844  | -1.098743305  | -2.2782846321 |
| C | 1.1246917634  | 0.1077915736  | 2.1754857279  |
| C | 2.4981168113  | -0.5316163818 | 1.9979498936  |
| H | 0.5438598544  | -0.4073943851 | 2.9429861245  |
| H | 1.2370965299  | 1.1477571943  | 2.4927255957  |
| C | 2.4325383307  | 0.2042634262  | -0.3491351787 |
| H | 1.191059242   | -1.4858249971 | -0.0636904641 |
| C | 3.1917377268  | 0.1006383701  | 0.8276743462  |
| H | 2.3920185983  | -1.6143422414 | 1.8492488382  |
| H | 3.0627526909  | -0.3925443201 | 2.9227626399  |
| C | 2.9956854102  | 0.8121752788  | -1.4740895035 |
| C | 4.2972757503  | 1.3173834213  | -1.421788481  |
| C | 5.0434447233  | 1.2197713623  | -0.248746564  |
| C | 4.4862943704  | 0.6132205402  | 0.8781153992  |
| H | 5.0563345497  | 0.5371207096  | 1.7993605861  |
| H | 6.0530905635  | 1.6157789216  | -0.2093738618 |
| H | 2.4468436821  | 0.8952918108  | -2.4037147103 |
| H | 4.7230032913  | 1.7879275367  | -2.3019893015 |
| C | -1.6052274136 | 1.9378179164  | -1.9264435317 |
| H | -3.019961121  | 0.347274289   | -1.7468190915 |
| H | -1.1019364075 | 1.7533813307  | -2.883682509  |
| C | -0.6577276818 | 2.7564078705  | -1.0334639013 |
| C | -2.8694824882 | 2.7584917909  | -2.2211012677 |
| H | -2.6022092069 | 3.7280570441  | -2.6509713926 |
| H | -3.4377407171 | 2.9386161844  | -1.303757071  |
| H | -3.5226218469 | 2.2408243742  | -2.9303834946 |
| H | -1.1348149685 | 3.0079717653  | -0.0809093434 |
| H | -0.418679118  | 3.6990334493  | -1.5328666552 |
| H | 0.2875974646  | 2.2565894047  | -0.815136782  |
| O | -3.1265611189 | 1.1774373205  | 0.6478616452  |
| O | -1.2841423296 | 0.9714241872  | 2.2373628762  |
| C | -1.5510254778 | -1.7715648392 | -0.7779280256 |
| H | -1.3622763627 | -0.9793732906 | -2.789929931  |
| C | -0.8145375399 | -2.9140566142 | -0.5106656931 |
| C | -2.5910699851 | -1.3723982831 | 0.1378464052  |
| C | -2.7509028004 | -2.0776026198 | 1.3741211769  |
| C | -1.9423868362 | -3.155903467  | 1.6593647639  |

|   |               |               |               |
|---|---------------|---------------|---------------|
| C | -1.0162486525 | -3.5981296881 | 0.6944128452  |
| H | -3.5360166149 | -1.056073613  | -0.3001596147 |
| H | -3.5411259823 | -1.7753322937 | 2.0527263294  |
| H | -0.0340505318 | -3.2412695381 | -1.1887114518 |
| H | -2.0430123063 | -3.6940260735 | 2.5944086593  |
| H | -0.4073804845 | -4.4705172103 | 0.9091115826  |
| H | -2.8354547282 | 1.3457569786  | 1.5885580785  |
| H | -2.8354547282 | 1.3457569786  | 1.5885580785  |

## 4 Black rearrangement

### 4.1 Major enantiomer

#### 4.1.1 Starting TS

TS input

E(RB3LYP) = -1488.75209795 A.U.

First frequency = -224.4010  $\text{cm}^{-1}$

|   |               |               |               |
|---|---------------|---------------|---------------|
| O | -1.8460327865 | -1.8637924436 | 1.2323555539  |
| O | 0.2774701639  | -1.4349212642 | 1.9609074965  |
| O | 0.3466138726  | 0.5645705621  | -0.466668626  |
| O | 0.4361536788  | -0.6398372474 | -2.4463551994 |
| O | -0.7715474054 | 3.1621389299  | 1.5155974617  |
| O | -1.4253860328 | 0.9941380412  | 1.6752409704  |
| N | -1.5894396263 | -0.3072023996 | -1.3619912452 |
| N | -3.6723452652 | -0.1046898833 | -0.792304184  |
| C | -0.4655448215 | -3.2570887352 | -1.1795355945 |
| C | -0.6448331144 | -1.8926794669 | 0.9897053644  |
| C | 0.0807269933  | -2.2528114941 | -0.2064292402 |
| C | 1.5410897322  | -1.6383639373 | 1.454257438   |
| C | 2.728592946   | -1.3760710839 | 2.1143075867  |
| C | 1.4825023112  | -2.1942825064 | 0.1631563454  |
| C | 2.671814216   | -2.5342077056 | -0.4838137171 |
| C | 3.888686348   | -2.2892485682 | 0.1700445996  |
| C | 3.9177107722  | -1.7078816746 | 1.4430257678  |
| C | -0.1052274297 | -0.3840494593 | -1.3787781066 |
| C | 0.5478995199  | 1.6045404431  | 2.8099042445  |

|   |               |               |               |
|---|---------------|---------------|---------------|
| C | -0.5996330688 | 2.0411297556  | 1.9484623042  |
| C | -2.4314612567 | 1.1971702889  | 0.6982196334  |
| C | -3.8414521118 | 0.9444632325  | 1.2825696889  |
| C | -4.6990320006 | 0.4734368011  | 0.0891824301  |
| C | -2.4211513269 | 0.2089906943  | -0.4386715195 |
| C | -2.3593740837 | -0.9687380838 | -2.3150141537 |
| C | -3.6690526073 | -0.836346191  | -1.9605603065 |
| H | -0.1252255491 | -4.2710921756 | -0.9369358705 |
| H | -1.5579907321 | -3.2571888626 | -1.1628060263 |
| H | -0.1278828025 | -3.0271228544 | -2.19645097   |
| H | 2.7353612279  | -0.9473499753 | 3.110667163   |
| H | 2.652029481   | -2.9731675257 | -1.4764391681 |
| H | 4.8222384027  | -2.5461254536 | -0.3218508211 |
| H | 4.8705954521  | -1.5181702109 | 1.9275057642  |
| H | 0.9566733352  | 2.4643913847  | 3.3399625219  |
| H | 0.2486549496  | 0.8130497579  | 3.496378841   |
| H | 1.3140296072  | 1.1890276576  | 2.1472541307  |
| H | -1.8869573611 | -1.4685758316 | -3.1420232854 |
| H | -4.5707506164 | -1.1925722933 | -2.430139684  |
| H | -2.3356312423 | 2.2081425771  | 0.2891190614  |
| H | -4.2487316178 | 1.8311960841  | 1.7679961985  |
| H | -3.7436033106 | 0.1393350573  | 2.01411275    |
| H | -5.1923489514 | 1.2990255362  | -0.4300799559 |
| H | -5.4398024615 | -0.2824978905 | 0.3514276612  |
| C | 1.3726545869  | 1.4253938965  | -0.877096423  |
| C | 2.6826372683  | 0.97227572    | -1.0042859528 |
| C | 1.0428968078  | 2.7653891918  | -1.0704059192 |
| C | 3.6812797808  | 1.8877959198  | -1.3414895174 |
| C | 2.0518871765  | 3.6725038019  | -1.3997300743 |
| C | 3.3716538418  | 3.2360212998  | -1.5393863779 |
| H | 2.905713668   | -0.0728252137 | -0.8403555493 |
| H | 0.0163635885  | 3.0847218871  | -0.9369833425 |
| H | 4.7059096363  | 1.542686792   | -1.4437783057 |
| H | 1.8035432167  | 4.7193449784  | -1.5463468363 |
| H | 4.154537001   | 3.9430381409  | -1.7964060048 |
| H | 4.154537001   | 3.9430381409  | -1.7964060048 |

### 4.1.2 Lowest TS

TS 6-311++G(d,p) 0011

E(RB3LYP) = -1489.12331988 A.U.

First frequency = -241.1707  $\text{cm}^{-1}$

|   |               |               |               |
|---|---------------|---------------|---------------|
| O | -1.6329068304 | 2.5052251665  | 0.1981990834  |
| O | 0.3425970396  | 2.367841263   | -0.9206360409 |
| O | 0.2726893734  | -0.7317437746 | 0.0972387842  |
| O | 0.502272227   | -0.7642503244 | 2.3947286585  |
| O | -0.9608860576 | -1.8201609261 | -2.7800420635 |
| O | -1.595719114  | 0.1426752042  | -1.8480910737 |
| N | -1.539510984  | -0.2414727535 | 1.4403415373  |
| N | -3.6401993411 | 0.0044845229  | 0.9766989187  |
| C | 0.1125379654  | 2.1888460724  | 2.7608133839  |
| C | -0.435954044  | 2.2685874223  | 0.2566739187  |
| C | 0.4055951908  | 1.8128344236  | 1.3362278887  |
| C | 1.6476509035  | 2.1079442561  | -0.574517167  |
| C | 2.7350538016  | 2.1733292672  | -1.425034754  |
| C | 1.7507994838  | 1.7926843345  | 0.7899681257  |
| C | 3.0097792132  | 1.5262435339  | 1.3269333169  |
| C | 4.1267429336  | 1.5766098216  | 0.484683771   |
| C | 3.9940824951  | 1.8949221502  | -0.8705741184 |
| C | -0.0662467973 | -0.3684954838 | 1.3914932659  |
| C | 0.1965906075  | 0.209194446   | -3.3745726557 |
| C | -0.8276644259 | -0.6239574639 | -2.6672523287 |
| C | -2.547392343  | -0.5181532302 | -1.0237470307 |
| C | -3.9807163285 | -0.0183707744 | -1.332906516  |
| C | -4.7441126587 | -0.0674781497 | 0.0059913166  |
| C | -2.4356158689 | -0.1931629451 | 0.4389733507  |
| C | -2.2206033757 | -0.0530370111 | 2.6391277735  |
| C | -3.542013983  | 0.0928164602  | 2.3479736066  |
| H | -0.9595968704 | 2.3177655754  | 2.9178828704  |
| H | 0.4783129025  | 1.420067135   | 3.4477650944  |
| H | 0.6031804502  | 3.1325318714  | 3.0243333903  |
| H | 2.6176993995  | 2.4334446687  | -2.4698383557 |
| H | 3.1190955369  | 1.2805711532  | 2.3767531825  |
| H | 5.1106466503  | 1.3652904684  | 0.8880989201  |
| H | 4.8723843984  | 1.9299863785  | -1.5046777006 |

|   |               |               |               |
|---|---------------|---------------|---------------|
| H | 0.5171702533  | -0.2996325707 | -4.281601307  |
| H | -0.1845082027 | 1.2055265322  | -3.5917091243 |
| H | 1.0520622528  | 0.3199633838  | -2.7046793475 |
| H | -1.6908189436 | -0.0422971954 | 3.5733246714  |
| H | -4.393791455  | 0.2494468008  | 2.9858789019  |
| H | -2.4484899808 | -1.5979549988 | -1.1553745939 |
| H | -4.4595204585 | -0.6158877546 | -2.1059210446 |
| H | -3.8982331911 | 1.012453168   | -1.6793005463 |
| H | -5.2801298886 | -1.0063341728 | 0.152068407   |
| H | -5.4278865492 | 0.7669078009  | 0.1501312712  |
| C | 1.1919916095  | -1.775567687  | -0.0572295918 |
| C | 0.8431893882  | -3.0716625116 | 0.3099907011  |
| C | 2.4106271252  | -1.4938628135 | -0.6573606983 |
| C | 1.7432603237  | -4.1075044886 | 0.0689222555  |
| C | 3.3013405784  | -2.5391488345 | -0.9032482516 |
| C | 2.9722279993  | -3.844889561  | -0.5402270785 |
| H | -0.1177306591 | -3.2603752654 | 0.7725449227  |
| H | 2.6550067192  | -0.4731408601 | -0.9151251518 |
| H | 1.4810891792  | -5.1205621488 | 0.3518330545  |
| H | 4.2550115227  | -2.3274619659 | -1.3731483431 |
| H | 3.6676150858  | -4.6543172588 | -0.7299541712 |
| H | 3.6676150858  | -4.6543172588 | -0.7299541712 |

#### 4.1.3 Additional TS

TS 6-31G(d,p) 0001

E(RB3LYP) = -1488.75700237 A.U.

First frequency = -87.4323  $\text{cm}^{-1}$

|   |               |               |               |
|---|---------------|---------------|---------------|
| O | -2.0073840185 | 2.4087523304  | 1.7752658218  |
| O | -0.2599237256 | 3.0283761677  | 0.4113069268  |
| O | 1.282189056   | -0.8685611377 | -0.9580786249 |
| O | -0.244343323  | -1.7258836498 | 0.5206438059  |
| O | -3.0717082233 | -1.9932092379 | -1.3052551964 |
| O | -3.0985301983 | -1.5844371329 | 0.9159184319  |
| N | -0.7669351931 | 0.0189916137  | -0.8860530691 |
| N | -2.5335957682 | 1.2317729203  | -1.1413859988 |
| C | 0.0640952986  | 0.4827205532  | 3.1507528281  |

|   |               |               |               |
|---|---------------|---------------|---------------|
| C | -0.7938114109 | 2.26168738    | 1.5122185221  |
| C | 0.2261153758  | 1.444871284   | 2.0156050533  |
| C | 1.0495620092  | 2.6608972413  | 0.2642696739  |
| C | 1.9234896122  | 3.1219536932  | -0.703006609  |
| C | 1.4014845397  | 1.6920932997  | 1.2403499842  |
| C | 2.7169078056  | 1.1979761077  | 1.2343531477  |
| C | 3.6133192239  | 1.6548980091  | 0.2607495513  |
| C | 3.2308506521  | 2.6004329     | -0.6999293054 |
| C | 0.1098500327  | -0.9627016434 | -0.3406368881 |
| C | -3.3413273129 | -3.838549187  | 0.2335389269  |
| C | -3.1578100973 | -2.4001386471 | -0.1624584791 |
| C | -2.9202457986 | -0.1829777239 | 0.6963067051  |
| C | -4.2360117393 | 0.5473721084  | 0.305279293   |
| C | -3.819042425  | 1.7179556437  | -0.6111186141 |
| C | -2.0244676239 | 0.2361065052  | -0.43611663   |
| C | -0.5112797439 | 0.9114563222  | -1.9367991991 |
| C | -1.6216965695 | 1.6792856513  | -2.0826024758 |
| H | -0.9152573432 | 0.6196949033  | 3.6215706346  |
| H | 0.1267749263  | -0.5660445218 | 2.8254371352  |
| H | 0.8275277462  | 0.6220458426  | 3.9286496053  |
| H | 1.60340086    | 3.856569371   | -1.435889154  |
| H | 3.0309293227  | 0.4587562155  | 1.9651390526  |
| H | 4.6267600766  | 1.2616567271  | 0.2473692651  |
| H | 3.9437476868  | 2.9365989772  | -1.4470073682 |
| H | -4.3270700491 | -4.1715446326 | -0.1041711038 |
| H | -2.5912417288 | -4.4401601014 | -0.2846389259 |
| H | -3.2571317592 | -3.9766389826 | 1.310642202   |
| H | 0.4373838291  | 0.9190276018  | -2.4424874472 |
| H | -1.8321644349 | 2.4956490637  | -2.7524536187 |
| H | -2.508449511  | 0.2112775492  | 1.625504055   |
| H | -4.7705857557 | 0.8953704694  | 1.187806612   |
| H | -4.8670167501 | -0.1544107312 | -0.2439737473 |
| H | -3.6044806615 | 2.6203210388  | -0.0363226001 |
| H | -4.5143080999 | 1.9182956927  | -1.4260969908 |
| C | 2.3550297691  | -1.7289752443 | -0.6533320411 |
| C | 3.1532858283  | -2.0622466221 | -1.7418466072 |
| C | 2.6443520797  | -2.152098852  | 0.6410891571  |
| C | 4.2798505589  | -2.8575815687 | -1.5295966507 |

|   |              |               |               |
|---|--------------|---------------|---------------|
| C | 3.7739176834 | -2.9499355602 | 0.8333452522  |
| C | 4.5904743978 | -3.3043132468 | -0.2431468033 |
| H | 2.8901521692 | -1.6969724508 | -2.7282985064 |
| H | 2.0148478025 | -1.8651036215 | 1.4709204094  |
| H | 4.9113645006 | -3.1247878707 | -2.3706543793 |
| H | 4.0154397127 | -3.2890064761 | 1.8356348833  |
| H | 5.4669391323 | -3.9229307798 | -0.0792205709 |
| H | 5.4669391323 | -3.9229307798 | -0.0792205709 |

TS 6-31G(d,p) 0003

E(RB3LYP) = -1488.75732104 A.U.

First frequency = -84.3080 cm<sup>-1</sup>

|   |               |               |               |
|---|---------------|---------------|---------------|
| O | -1.5495721255 | 2.3167380019  | 0.7598041644  |
| O | 0.5078483193  | 2.7770575393  | -0.1703309631 |
| O | 0.9418494117  | -0.7870334857 | -1.2102869882 |
| O | -0.4060521233 | -1.6348360119 | 0.4430288172  |
| O | -3.3479325274 | -2.2648629571 | -0.9370579601 |
| O | -3.1949601063 | -1.5043894961 | 1.1850120466  |
| N | -1.1582984154 | -0.0452458341 | -1.0498937064 |
| N | -3.0432426818 | 0.9797577457  | -1.3283537293 |
| C | 0.0435204859  | 0.5647752302  | 2.8247414347  |
| C | -0.3156905869 | 2.130732605   | 0.8228293341  |
| C | 0.5153110873  | 1.3800051459  | 1.6634808055  |
| C | 1.8053356816  | 2.4505330782  | 0.1124393298  |
| C | 2.9268060838  | 2.891793348   | -0.5671298033 |
| C | 1.8655050454  | 1.5982128868  | 1.2450808337  |
| C | 3.1287320985  | 1.1973966921  | 1.7089479006  |
| C | 4.2737520183  | 1.6475204385  | 1.0412819451  |
| C | 4.1831714241  | 2.4757668482  | -0.0862907477 |
| C | -0.1730619229 | -0.9018117867 | -0.4856236681 |
| C | -3.2762668855 | -3.8511878608 | 0.8863153036  |
| C | -3.2775299348 | -2.4864345655 | 0.2561544948  |
| C | -3.150577113  | -0.149498792  | 0.7331648225  |
| C | -4.5488012728 | 0.4210535717  | 0.3661701386  |
| C | -4.2950650766 | 1.4719194009  | -0.7355535474 |
| C | -2.3883349686 | 0.1519752171  | -0.5266307278 |
| C | -1.0493837103 | 0.7306233657  | -2.2153249859 |

|   |               |               |               |
|---|---------------|---------------|---------------|
| C | -2.2306142392 | 1.3794848161  | -2.3743504084 |
| H | -0.0031315718 | -0.508594999  | 2.5922566075  |
| H | 0.7037590248  | 0.6806156566  | 3.6938955761  |
| H | -0.9620613992 | 0.8760654557  | 3.1295069197  |
| H | 2.8341724588  | 3.5436359754  | -1.4305517146 |
| H | 3.215003959   | 0.5437222529  | 2.572578702   |
| H | 5.2532271506  | 1.337335084   | 1.3960959363  |
| H | 5.0855159347  | 2.8050436248  | -0.5927777817 |
| H | -4.263118082  | -4.3028942149 | 0.7486464602  |
| H | -2.5482563035 | -4.4742693615 | 0.3624038493  |
| H | -3.0399002075 | -3.8066952346 | 1.948641397   |
| H | -0.1498485185 | 0.7266943846  | -2.804297654  |
| H | -2.5581540155 | 2.0686136067  | -3.1346538596 |
| H | -2.6773412153 | 0.4105229062  | 1.5392738018  |
| H | -5.0484844236 | 0.8488847164  | 1.2344335178  |
| H | -5.1572004816 | -0.3949299312 | -0.0287688782 |
| H | -4.0947663619 | 2.463095827   | -0.3229047951 |
| H | -5.0825088126 | 1.5263253931  | -1.4871276377 |
| C | 2.0631571078  | -1.5948423316 | -0.9319052168 |
| C | 3.2847528192  | -0.9355651611 | -0.9281708308 |
| C | 1.9507060754  | -2.9717980491 | -0.7616689797 |
| C | 4.4439385072  | -1.6870721757 | -0.7335087476 |
| C | 3.1215782812  | -3.7069774631 | -0.5654236511 |
| C | 4.3653614327  | -3.0698425546 | -0.5507679112 |
| H | 3.3149540567  | 0.1396877754  | -1.0543660155 |
| H | 0.9803990914  | -3.4518646918 | -0.7739153446 |
| H | 5.4049740517  | -1.1831679571 | -0.7159547092 |
| H | 3.056702371   | -4.7814581018 | -0.4262846187 |
| H | 5.2694916034  | -3.6503305264 | -0.3964813121 |
| H | 5.2694916034  | -3.6503305264 | -0.3964813121 |

TS 6-31G(d,p) 0008

E(RB3LYP) = -1488.75158089 A.U.

First frequency = -210.8010  $\text{cm}^{-1}$

|   |               |               |              |
|---|---------------|---------------|--------------|
| O | -1.6700236567 | 2.4385306392  | 0.1524975726 |
| O | 0.1522669237  | 1.9639791347  | -1.144316471 |
| O | 0.3115638783  | -0.8679877281 | 0.4451341313 |



|   |               |               |               |
|---|---------------|---------------|---------------|
| O | 0.566010133   | -0.4005337192 | 2.7147002283  |
| O | -0.806257281  | -1.3148006148 | -2.8620513248 |
| O | -2.1834565505 | 0.0440309433  | -1.6760750811 |
| N | -1.4677984177 | -0.1257449455 | 1.6412172313  |
| N | -3.5800981972 | -0.1356908337 | 1.1536953097  |
| C | 0.3483518288  | 2.5280334709  | 2.5144481922  |
| C | -0.4755165929 | 2.1693882558  | 0.1165636931  |
| C | 0.4927092463  | 1.9193395655  | 1.1515034043  |
| C | 1.4874178964  | 1.7267641284  | -0.9081315909 |
| C | 2.4530549819  | 1.5278595333  | -1.8768616349 |
| C | 1.7591266864  | 1.7255866181  | 0.4725966576  |
| C | 3.070553235   | 1.502824429   | 0.8991742009  |
| C | 4.0664860458  | 1.2910041832  | -0.0628296399 |
| C | 3.7646746535  | 1.2999436619  | -1.4297826305 |
| C | 0.0042249394  | -0.2531716401 | 1.6376432663  |
| C | -1.3542995833 | 0.8904474527  | -3.7065841486 |
| C | -1.3837101813 | -0.2548144679 | -2.7344163485 |
| C | -2.4206213655 | -0.9900907357 | -0.7038192773 |
| C | -3.9112495741 | -1.41311106   | -0.7630231796 |
| C | -4.6549988431 | -0.4618348365 | 0.2026815801  |
| C | -2.3595456684 | -0.4004443517 | 0.6741917599  |
| C | -2.1599729602 | 0.3447114764  | 2.7474607598  |
| C | -3.4907651997 | 0.3444756735  | 2.4390172344  |
| H | -0.7029481124 | 2.7446984548  | 2.7234154373  |
| H | 0.7276679105  | 1.8500954277  | 3.2872883441  |
| H | 0.9051429566  | 3.4703679386  | 2.5928481518  |
| H | 2.2005866637  | 1.5393669329  | -2.9320831109 |
| H | 3.3091382502  | 1.4877183118  | 1.9582823149  |
| H | 5.0891799744  | 1.1121226859  | 0.2565968838  |
| H | 4.5523026493  | 1.1299226008  | -2.1575788681 |
| H | -0.6662357342 | 0.6588067437  | -4.5188697785 |
| H | -2.3597562443 | 1.0539104673  | -4.1056095429 |
| H | -1.0413355861 | 1.7942516571  | -3.1823203605 |
| H | -1.6346999222 | 0.6100606644  | 3.6479975798  |
| H | -4.3522322724 | 0.6214325891  | 3.0232722904  |
| H | -1.719259091  | -1.8073548808 | -0.857231823  |
| H | -4.0032535287 | -2.442085046  | -0.4061887628 |
| H | -4.2892085018 | -1.3587155164 | -1.7839337784 |

|   |               |               |               |
|---|---------------|---------------|---------------|
| H | -5.488418256  | -0.9325970698 | 0.7235565907  |
| H | -4.9959315008 | 0.4574540339  | -0.2789845825 |
| C | 1.464490958   | -1.6342251557 | 0.2682394149  |
| C | 2.0921338409  | -2.3586171566 | 1.2858105147  |
| C | 1.9097509442  | -1.7118715222 | -1.051633553  |
| C | 3.2013351682  | -3.1436904387 | 0.9618262117  |
| C | 3.0118693092  | -2.5079973774 | -1.3564308615 |
| C | 3.668473729   | -3.2225540472 | -0.3514224435 |
| H | 1.7317406393  | -2.2993840423 | 2.3018902184  |
| H | 1.3849759665  | -1.1545678909 | -1.8152229767 |
| H | 3.697550033   | -3.7019169469 | 1.7503995702  |
| H | 3.3588804493  | -2.5636044817 | -2.3839166354 |
| H | 4.5313941077  | -3.8368375297 | -0.5894400219 |
| H | 4.5313941077  | -3.8368375297 | -0.5894400219 |

TS 6-31G(d,p) 0009

E(RB3LYP) = -1488.75686172 A.U.

First frequency = -79.6070  $\text{cm}^{-1}$

|   |               |               |               |
|---|---------------|---------------|---------------|
| O | -1.6299877977 | 2.0275152365  | 1.0452754545  |
| O | 0.3614645947  | 2.694204933   | 0.1040854031  |
| O | 1.0775115915  | -0.5996662842 | -1.1907230782 |
| O | -0.4579135003 | -1.686368361  | 0.1429396648  |
| O | -3.0976512039 | -2.3677106194 | 2.0863957498  |
| O | -3.5465999775 | -1.6031541035 | -0.005812634  |
| N | -1.0398312634 | 0.1022577917  | -1.1833979684 |
| N | -2.9141456988 | 1.1493936218  | -1.4840955097 |
| C | 0.0989494567  | 0.0762107639  | 2.7718661229  |
| C | -0.3876045175 | 1.8922048849  | 1.03481671    |
| C | 0.5030005837  | 1.0532749172  | 1.7157960338  |
| C | 1.6770938837  | 2.3465961668  | 0.246312091   |
| C | 2.7410162423  | 2.8707395822  | -0.4664650694 |
| C | 1.8214867894  | 1.3469531321  | 1.2403065876  |
| C | 3.1111968964  | 0.8724600147  | 1.5247089536  |
| C | 4.1976472771  | 1.3929195672  | 0.8147582978  |
| C | 4.0226164905  | 2.3746095464  | -0.1709291875 |
| C | -0.1060371613 | -0.8201569158 | -0.6234351184 |
| C | -3.7963266835 | -3.925259269  | 0.3789204803  |

|   |               |               |               |
|---|---------------|---------------|---------------|
| C | -3.4313365008 | -2.5759927747 | 0.9403862427  |
| C | -3.1454067142 | -0.270356629  | 0.3814735415  |
| C | -4.3333507442 | 0.725383966   | 0.3435615688  |
| C | -4.2837542513 | 1.4427725535  | -1.0334603401 |
| C | -2.2882042447 | 0.280275059   | -0.7013413007 |
| C | -0.8725442198 | 0.961796083   | -2.2792419341 |
| C | -2.0541205042 | 1.6109499594  | -2.4637803392 |
| H | 0.0852206942  | -0.9578961433 | 2.3998288548  |
| H | 0.7772158258  | 0.1043513911  | 3.6340220997  |
| H | -0.9112207274 | 0.3019605983  | 3.129688128   |
| H | 2.5835563245  | 3.6339751351  | -1.2224774032 |
| H | 3.2593341469  | 0.0957397187  | 2.2692237632  |
| H | 5.1967399096  | 1.0188479525  | 1.0217873175  |
| H | 4.8823379733  | 2.7585161731  | -0.712213749  |
| H | -3.9582949933 | -3.8902143741 | -0.6978712779 |
| H | -2.9946572462 | -4.6286096969 | 0.6161484951  |
| H | -4.7047008198 | -4.2781639946 | 0.8757036521  |
| H | 0.0640499165  | 1.0184540858  | -2.8046142055 |
| H | -2.3436103154 | 2.3459561     | -3.196122988  |
| H | -2.6396734549 | -0.298743635  | 1.3417401184  |
| H | -4.1822383422 | 1.4548751965  | 1.138439322   |
| H | -5.2768434489 | 0.2028281909  | 0.5017967728  |
| H | -4.4182849367 | 2.5216020807  | -0.9523984729 |
| H | -4.9927378623 | 1.043188104   | -1.7616859032 |
| C | 2.2484211078  | -1.3229196637 | -0.9132584498 |
| C | 3.305542453   | -0.9863647881 | -1.755409601  |
| C | 2.3878800877  | -2.2615255412 | 0.107711225   |
| C | 4.5407719434  | -1.6032248622 | -1.5728258951 |
| C | 3.6352060682  | -2.8689450474 | 0.2733496386  |
| C | 4.7101191759  | -2.5470946094 | -0.5567164865 |
| H | 3.152484283   | -0.2354367379 | -2.5220248702 |
| H | 1.561269782   | -2.5035039611 | 0.757656022   |
| H | 5.3700502823  | -1.3401402316 | -2.221672389  |
| H | 3.7603014685  | -3.5987714214 | 1.0672054568  |
| H | 5.6730667307  | -3.0263653622 | -0.4120080118 |
| H | 5.6730667307  | -3.0263653622 | -0.4120080118 |

TS 6-31G(d,p) 0011

E(RB3LYP) = -1488.75261371 A.U.

First frequency = -216.9824  $\text{cm}^{-1}$

|   |               |               |               |
|---|---------------|---------------|---------------|
| O | -1.7002291837 | 2.3973374973  | 0.1254792028  |
| O | 0.2957290778  | 2.3034862899  | -0.9839860156 |
| O | 0.2847837088  | -0.7504724149 | 0.0717743627  |
| O | 0.5492163213  | -0.7714633733 | 2.3705622927  |
| O | -0.9376617031 | -1.8911669124 | -2.6334764187 |
| O | -1.5999511295 | 0.1371294534  | -1.8513012157 |
| N | -1.5161089382 | -0.2941883429 | 1.4401953457  |
| N | -3.6210357056 | 0.0037823263  | 1.0159529679  |
| C | 0.0340894701  | 2.1887327001  | 2.7101163204  |
| C | -0.4879189086 | 2.2165210587  | 0.1957538672  |
| C | 0.3623230852  | 1.8260711817  | 1.2910484066  |
| C | 1.6044132275  | 2.0902582089  | -0.6219219685 |
| C | 2.6973063285  | 2.1548202501  | -1.4699139673 |
| C | 1.7099676186  | 1.8260804333  | 0.7570267053  |
| C | 2.974367182   | 1.6047829901  | 1.3071084588  |
| C | 4.0955477614  | 1.65837331    | 0.4678358128  |
| C | 3.9620516937  | 1.9293486683  | -0.8997417418 |
| C | -0.0477405201 | -0.4019158378 | 1.3700753102  |
| C | 0.2610650625  | 0.0954284849  | -3.3011074357 |
| C | -0.8032978467 | -0.6866376755 | -2.5894057776 |
| C | -2.5734514686 | -0.4728134138 | -1.0203060674 |
| C | -3.9704208679 | 0.1384516985  | -1.2853984706 |
| C | -4.7320111671 | 0.0284734088  | 0.0522261961  |
| C | -2.4253732196 | -0.1966756563 | 0.4525859032  |
| C | -2.1773068695 | -0.1308650633 | 2.6556223516  |
| C | -3.5013058673 | 0.0502077693  | 2.3883191926  |
| H | -1.0448090282 | 2.3097944352  | 2.8355584683  |
| H | 0.3838927633  | 1.4126973053  | 3.4006259284  |
| H | 0.5129142448  | 3.1320411652  | 3.0008378088  |
| H | 2.5767591395  | 2.3756494215  | -2.5250598465 |
| H | 3.0826835345  | 1.3923953938  | 2.3661574719  |
| H | 5.0839025885  | 1.4851933242  | 0.8834397101  |
| H | 4.8439287556  | 1.9668575916  | -1.5318503548 |
| H | 0.5151999032  | -0.4040316537 | -4.236402822  |
| H | -0.0437077023 | 1.1277781096  | -3.4667314967 |

|   |               |               |               |
|---|---------------|---------------|---------------|
| H | 1.1450950718  | 0.1066530793  | -2.6566916132 |
| H | -1.6286403808 | -0.159136341  | 3.5802533253  |
| H | -4.3427408883 | 0.2020110825  | 3.0436786867  |
| H | -2.5531783956 | -1.555552007  | -1.1810159121 |
| H | -4.4877069578 | -0.3608681408 | -2.1043726621 |
| H | -3.8144852704 | 1.1891163742  | -1.5401469197 |
| H | -5.3020457999 | -0.8998194091 | 0.1406143798  |
| H | -5.3879939734 | 0.8755617747  | 0.2544694027  |
| C | 1.2114324609  | -1.7891967655 | -0.0820301158 |
| C | 0.8200269129  | -3.1006734369 | 0.1795676453  |
| C | 2.4774885423  | -1.487430328  | -0.5698323862 |
| C | 1.7263684766  | -4.135107276  | -0.0535319208 |
| C | 3.3736939282  | -2.5323911357 | -0.8081239184 |
| C | 3.003181758   | -3.8538545523 | -0.5497477679 |
| H | -0.1800012864 | -3.2977318166 | 0.5506579638  |
| H | 2.7488062367  | -0.4551857346 | -0.7478577115 |
| H | 1.4321848717  | -5.1609896842 | 0.1461983441  |
| H | 4.3646691851  | -2.3074426479 | -1.190736354  |
| H | 3.7040884262  | -4.6621148108 | -0.7342256629 |
| H | 3.7040884262  | -4.6621148108 | -0.7342256629 |

TS 6-31G(d,p) 0012

E(RB3LYP) = -1488.74665915 A.U.

First frequency = -211.6497  $\text{cm}^{-1}$

|   |               |               |               |
|---|---------------|---------------|---------------|
| O | 3.4450403849  | 0.1792253791  | 0.5730194339  |
| O | 1.9192364757  | 1.0659388457  | 2.0106717026  |
| O | 0.9563118493  | -1.064918948  | -1.5244783787 |
| O | 0.1864618644  | -0.9953631677 | 0.6823571872  |
| O | -3.0402341032 | -1.9653574449 | -0.0332042264 |
| O | -2.3816053651 | -0.8249027218 | 1.8057388333  |
| N | -0.9020536683 | 0.1207925078  | -1.0269464144 |
| N | -2.835207954  | 1.0952035699  | -1.1124594194 |
| C | 1.9654696458  | 1.7282961673  | -1.6325218429 |
| C | 2.413554431   | 0.8100660713  | 0.7078370653  |
| C | 1.4746622429  | 1.3649354995  | -0.2580209621 |
| C | 0.8354946943  | 1.9026810899  | 1.882909604   |
| C | 0.108401481   | 2.4457885961  | 2.9259818692  |

|   |               |               |               |
|---|---------------|---------------|---------------|
| C | 0.5736087918  | 2.1873252868  | 0.5270981354  |
| C | -0.4588909157 | 3.0762139928  | 0.2130278691  |
| C | -1.2060987371 | 3.6473378442  | 1.2553792033  |
| C | -0.9346877641 | 3.3306037145  | 2.5912702191  |
| C | 0.30601436    | -0.499875036  | -0.4349128041 |
| C | -2.2714198727 | -3.170999177  | 1.9240675613  |
| C | -2.6245636325 | -1.961144773  | 1.1084728205  |
| C | -2.4688725553 | 0.4255858448  | 1.1175965942  |
| C | -3.9362329788 | 0.9197687627  | 0.947849813   |
| C | -4.0099076572 | 1.6388051105  | -0.4192007723 |
| C | -1.9774731327 | 0.4691884328  | -0.3035834431 |
| C | -1.1089353589 | 0.5354718033  | -2.3404194447 |
| C | -2.3216273094 | 1.1603470319  | -2.3898770232 |
| H | 1.1353219083  | 1.9269049551  | -2.316171612  |
| H | 2.5851317447  | 2.6341972088  | -1.6094338995 |
| H | 2.5678989534  | 0.9191764605  | -2.0493088372 |
| H | 0.3416254021  | 2.203476867   | 3.9571196337  |
| H | -0.6758487689 | 3.3229505633  | -0.8223129209 |
| H | -2.0058327538 | 4.3441789532  | 1.0218089929  |
| H | -1.5272960753 | 3.7765852492  | 3.3837752645  |
| H | -1.1799762726 | -3.2548754088 | 1.9311713492  |
| H | -2.6077713552 | -3.0589363692 | 2.9566998727  |
| H | -2.704135058  | -4.0618309257 | 1.4704249445  |
| H | -0.389970358  | 0.3195794801  | -3.1101602834 |
| H | -2.8496290713 | 1.6177890806  | -3.2099767237 |
| H | -1.8780905078 | 1.1045325319  | 1.73115676    |
| H | -4.229586379  | 1.575343573   | 1.76733355    |
| H | -4.5888408248 | 0.0458561586  | 0.9433331837  |
| H | -3.8918171237 | 2.7214719824  | -0.3301058535 |
| H | -4.9173783333 | 1.4176411145  | -0.9817124525 |
| C | 2.0022218899  | -1.9679707627 | -1.3984016004 |
| C | 2.1396095705  | -2.8816345573 | -0.3494363657 |
| C | 2.896333653   | -1.9683983749 | -2.4718673743 |
| C | 3.2063732105  | -3.7818734482 | -0.3819370492 |
| C | 3.9503444239  | -2.8801606237 | -2.4921088737 |
| C | 4.1136198032  | -3.7890991981 | -1.4437024044 |
| H | 1.4391052599  | -2.8710344927 | 0.47196206    |
| H | 2.7516823526  | -1.254371448  | -3.2757016104 |

|   |              |               |               |
|---|--------------|---------------|---------------|
| H | 3.3219375452 | -4.4883982487 | 0.4348679743  |
| H | 4.6445763978 | -2.8759384115 | -3.3270604282 |
| H | 4.9369332346 | -4.4964624736 | -1.4554503533 |
| H | 4.9369332346 | -4.4964624736 | -1.4554503533 |

TS 6-31G(d,p) 0016

E(RB3LYP) = -1488.75031527 A.U.

First frequency = -225.7892  $\text{cm}^{-1}$

|   |               |               |               |
|---|---------------|---------------|---------------|
| O | -1.4177520889 | 2.1218715337  | -0.5294948345 |
| O | 0.6709911688  | 1.6439331027  | -1.3233821083 |
| O | 0.404187479   | -0.844890841  | 0.374257379   |
| O | 0.6069908132  | -0.300363179  | 2.6346604859  |
| O | -3.5380946299 | 0.6265112073  | -2.0385178306 |
| O | -1.7003307845 | -0.6955685483 | -1.8528416219 |
| N | -1.41447103   | -0.1538373462 | 1.5050211062  |
| N | -3.5064127531 | -0.440996575  | 1.0085203702  |
| C | 0.0221262914  | 2.6758628087  | 2.1886901465  |
| C | -0.2283506812 | 1.9654510171  | -0.2709017716 |
| C | 0.4964934632  | 1.9492118503  | 0.9674090095  |
| C | 1.93134341    | 1.5541539143  | -0.7765654346 |
| C | 3.0953476577  | 1.2768148342  | -1.4686192545 |
| C | 1.8905753031  | 1.7821379236  | 0.61111708418 |
| C | 3.0826396862  | 1.7451960682  | 1.3379338538  |
| C | 4.2753137909  | 1.4673714995  | 0.6589485965  |
| C | 4.2827431568  | 1.2291050923  | -0.7210037208 |
| C | 0.0653848011  | -0.2089773834 | 1.5417957078  |
| C | -1.6731010941 | 0.9196613389  | -3.5578860424 |
| C | -2.4278011683 | 0.3138525831  | -2.4098981889 |
| C | -2.2101328456 | -1.4056433569 | -0.7132871758 |
| C | -3.6818379353 | -1.9172299143 | -0.8003665012 |
| C | -4.5355633692 | -1.02886044   | 0.13513116    |
| C | -2.2595199428 | -0.6048861916 | 0.5583015852  |
| C | -2.169182017  | 0.3214435398  | 2.5672926527  |
| C | -3.4868799932 | 0.147615503   | 2.2523910534  |
| H | 0.2928745169  | 2.1232277055  | 3.0964791652  |
| H | 0.4748949839  | 3.672646771   | 2.264652765   |
| H | -1.0630984541 | 2.8044619752  | 2.1629103797  |

|   |               |               |               |
|---|---------------|---------------|---------------|
| H | 3.0832996753  | 1.0950838265  | -2.5379819346 |
| H | 3.0785111833  | 1.9151667695  | 2.4102667937  |
| H | 5.2096481703  | 1.42778379    | 1.2117134535  |
| H | 5.2185658374  | 1.0064724486  | -1.2246788088 |
| H | -0.7339309919 | 1.3273017238  | -3.1802199581 |
| H | -1.4416368325 | 0.1489068791  | -4.2987300018 |
| H | -2.2761549887 | 1.705455848   | -4.0111152873 |
| H | -1.6938699614 | 0.7125138554  | 3.4491402492  |
| H | -4.3819528274 | 0.3745109135  | 2.8072124664  |
| H | -1.5069513859 | -2.2298220713 | -0.6102744293 |
| H | -3.6975436503 | -2.9488952324 | -0.4415501974 |
| H | -4.0469560128 | -1.901831776  | -1.8255513376 |
| H | -5.2404214621 | -1.598243567  | 0.7416884115  |
| H | -5.0487145223 | -0.2298414894 | -0.3973785279 |
| C | 1.5868463892  | -1.5304174773 | 0.1349981796  |
| C | 2.631826793   | -1.6961303211 | 1.0437133509  |
| C | 1.6493143139  | -2.0755378058 | -1.151188465  |
| C | 3.7499419642  | -2.4317017322 | 0.6412928157  |
| C | 2.7707650354  | -2.8082311699 | -1.5307696111 |
| C | 3.8277986744  | -2.9924908518 | -0.6339633267 |
| H | 2.5780635772  | -1.2449009689 | 2.0221502868  |
| H | 0.8240447127  | -1.8952870341 | -1.8323827763 |
| H | 4.5705330103  | -2.5593384594 | 1.3412424319  |
| H | 2.8200295954  | -3.2299137171 | -2.5302555236 |
| H | 4.704392912   | -3.5602304919 | -0.9298800747 |
| H | 4.704392912   | -3.5602304919 | -0.9298800747 |

TS 6-31G(d,p) 0017

E(RB3LYP) = -1488.74824334 A.U.

First frequency = -202.5997  $\text{cm}^{-1}$

|   |               |               |               |
|---|---------------|---------------|---------------|
| O | 3.4331441049  | 0.2885165772  | 0.5061304093  |
| O | 1.8241912144  | 0.8790954113  | 2.0062229993  |
| O | 1.1699475125  | -0.8330447536 | -1.6948377559 |
| O | 0.1620280551  | -0.9774421789 | 0.4088454444  |
| O | -1.9878823232 | -1.2325059798 | 2.8826251332  |
| O | -2.7747195305 | -1.1726071223 | 0.7517463642  |
| N | -0.7859842443 | 0.2427532727  | -1.3104327607 |



|   |               |               |                |
|---|---------------|---------------|----------------|
| N | -2.7609413276 | 1.1202061248  | -1.5027380798  |
| C | 1.9261500415  | 2.077489983   | -1.5057516858  |
| C | 2.372325958   | 0.8553052472  | 0.6998645675   |
| C | 1.444366803   | 1.5211033194  | -0.1970966339  |
| C | 0.699700455   | 1.6690924297  | 1.9668829768   |
| C | -0.0952981715 | 1.9960091194  | 3.0484673642   |
| C | 0.4720623354  | 2.1579130336  | 0.6628192315   |
| C | -0.5977623994 | 3.0326895453  | 0.4484305848   |
| C | -1.4078029938 | 3.3930613377  | 1.5368899271   |
| C | -1.1716627745 | 2.8725935075  | 2.8134147947   |
| C | 0.3705097541  | -0.3978818513 | -0.65111100907 |
| C | -2.3961737926 | -3.2977691583 | 1.6831471107   |
| C | -2.3505603944 | -1.8082412878 | 1.8817742078   |
| C | -2.5347089675 | 0.2459259542  | 0.6769692004   |
| C | -3.8577190658 | 1.0529814805  | 0.5791565457   |
| C | -4.0813881496 | 1.402194561   | -0.9176336352  |
| C | -1.9224109279 | 0.521674136   | -0.6544727825  |
| C | -0.9168487264 | 0.7032577124  | -2.6172537123  |
| C | -2.1623611167 | 1.2552869838  | -2.7369446657  |
| H | 2.5413261964  | 2.9752121844  | -1.3614525488  |
| H | 2.5297593587  | 1.3392103104  | -2.0377147541  |
| H | 1.0890075631  | 2.3643070945  | -2.1495655111  |
| H | 0.1084686019  | 1.594701913   | 4.0350785992   |
| H | -0.7879465699 | 3.4392084661  | -0.5409309295  |
| H | -2.2327659938 | 4.0829570765  | 1.3838266141   |
| H | -1.8174525708 | 3.1535059925  | 3.6394012023   |
| H | -2.2654240782 | -3.8026790085 | 2.639373964    |
| H | -3.3359972719 | -3.5980267253 | 1.2143685228   |
| H | -1.581203721  | -3.5746300982 | 1.0066902075   |
| H | -0.1242345438 | 0.5785286071  | -3.3334668404  |
| H | -2.652959654  | 1.7127760874  | -3.579935062   |
| H | -1.9095706177 | 0.5551092126  | 1.5121663868   |
| H | -3.7487416794 | 1.9668754029  | 1.163525494    |
| H | -4.6831898054 | 0.4709737313  | 0.9891431033   |
| H | -4.3400963071 | 2.4499169996  | -1.07585228    |
| H | -4.8264993739 | 0.7703055218  | -1.4053289598  |
| C | 2.137808486   | -1.817210952  | -1.5276788211  |
| C | 1.9696598759  | -2.9403971587 | -0.714292375   |

|   |              |               |               |
|---|--------------|---------------|---------------|
| C | 3.2743376424 | -1.6688153929 | -2.3243875516 |
| C | 2.9767174615 | -3.908238456  | -0.6923156221 |
| C | 4.2641675582 | -2.6490116396 | -2.299080039  |
| C | 4.1223619874 | -3.7716367972 | -1.4784206776 |
| H | 1.0818086937 | -3.0428313268 | -0.1073748763 |
| H | 3.3671443474 | -0.7885060739 | -2.9507863056 |
| H | 2.8549306797 | -4.7800045157 | -0.0561534673 |
| H | 5.1485400865 | -2.5316529796 | -2.9180723553 |
| H | 4.8962687097 | -4.5324533532 | -1.4540036174 |
| H | 4.8962687097 | -4.5324533532 | -1.4540036174 |

TS 6-31G(d,p) 0018

E(RB3LYP) = -1488.75261369 A.U.

First frequency = -216.9248  $\text{cm}^{-1}$

|   |               |               |               |
|---|---------------|---------------|---------------|
| O | -1.6877318503 | 2.4127360085  | -0.2542135202 |
| O | 0.3173857297  | 2.1646067561  | -1.3226469091 |
| O | 0.3056015187  | -0.7020078375 | 0.1689196695  |
| O | 0.5517202814  | -0.3850511239 | 2.4478751872  |
| O | -0.8928482318 | -2.2309159505 | -2.3493109904 |
| O | -1.5661585139 | -0.1122625293 | -1.877743202  |
| N | -1.5073537769 | -0.0569995955 | 1.4421611719  |
| N | -3.6095281211 | 0.1683849166  | 0.9630517762  |
| C | 0.0259673198  | 2.5909024565  | 2.346366443   |
| C | -0.4755961397 | 2.2484905401  | -0.148931372  |
| C | 0.3666575986  | 2.0257051262  | 0.9982164935  |
| C | 1.6235998636  | 2.0113992992  | -0.9232169926 |
| C | 2.7231983613  | 1.9550482322  | -1.7630879054 |
| C | 1.7185823372  | 1.9523548318  | 0.4803284505  |
| C | 2.9789994967  | 1.8184850503  | 1.0665908767  |
| C | 4.106837882   | 1.7526708128  | 0.237162075   |
| C | 3.9838125858  | 1.8200451547  | -1.1563396117 |
| C | -0.0382326185 | -0.1683742482 | 1.3995973277  |
| C | 0.306815055   | -0.3594412049 | -3.2913212847 |
| C | -0.76157603   | -1.0324595675 | -2.481019154  |
| C | -2.5447594721 | -0.5972940226 | -0.9736648016 |
| C | -3.9409429296 | -0.0360517469 | -1.3357227432 |
| C | -4.7128898224 | 0.0475447009  | -0.0021651296 |

|   |               |               |               |
|---|---------------|---------------|---------------|
| C | -2.4089483609 | -0.108120461  | 0.4440571325  |
| C | -2.1786058736 | 0.2799672445  | 2.6156222177  |
| C | -3.5008548726 | 0.4153354669  | 2.3147455846  |
| H | 0.370866496   | 1.924927251   | 3.1456947976  |
| H | 0.5011921453  | 3.5677069484  | 2.500099238   |
| H | -1.0541092677 | 2.7263204484  | 2.443924327   |
| H | 2.6106990236  | 2.0185420647  | -2.8400938789 |
| H | 3.0792102081  | 1.763784288   | 2.1461223621  |
| H | 5.0921976536  | 1.6457500444  | 0.6812315474  |
| H | 4.8707067187  | 1.7677795708  | -1.7803286662 |
| H | 0.5696457821  | -0.9896495737 | -4.1413766914 |
| H | 0.0011766659  | 0.6365232185  | -3.6086516895 |
| H | 1.1855661498  | -0.2510468311 | -2.648715671  |
| H | -1.6372560052 | 0.3892113942  | 3.5385404478  |
| H | -4.3478385152 | 0.6584016303  | 2.9344951414  |
| H | -2.5208554369 | -1.6918248641 | -0.9740476898 |
| H | -4.4505122868 | -0.651180816  | -2.0770580566 |
| H | -3.7853409486 | 0.9667959605  | -1.7397041792 |
| H | -5.2808626022 | -0.8601995325 | 0.2166864087  |
| H | -5.3729522792 | 0.9124114197  | 0.0692024966  |
| C | 1.2363066408  | -1.7484738851 | 0.1760360543  |
| C | 2.5055605211  | -1.5165055486 | -0.3407719098 |
| C | 0.8461379914  | -3.009072917  | 0.6235432862  |
| C | 3.4064377892  | -2.5816757665 | -0.416585004  |
| C | 1.7570824197  | -4.0630280943 | 0.5514089782  |
| C | 3.0372487189  | -3.8525255051 | 0.0294456332  |
| H | 2.7756344007  | -0.52041386   | -0.6658488002 |
| H | -0.1564819312 | -3.1535585398 | 1.0114540104  |
| H | 4.3999609684  | -2.4113532709 | -0.8202286495 |
| H | 1.4639134935  | -5.0497810453 | 0.8967208196  |
| H | 3.7417741816  | -4.6764066671 | -0.0292928764 |
| H | 3.7417741816  | -4.6764066671 | -0.0292928764 |

TS 6-31G(d,p) 0020

E(RB3LYP) = -1488.74913816 A.U.

First frequency = -177.4490 cm<sup>-1</sup>

|   |               |             |              |
|---|---------------|-------------|--------------|
| O | -1.2636622774 | 1.296231413 | 2.6074390507 |
|---|---------------|-------------|--------------|

|   |               |               |               |
|---|---------------|---------------|---------------|
| O | -0.3707979099 | 2.8286692275  | 1.1655858755  |
| O | 1.4380305981  | -0.7204224154 | -0.365311494  |
| O | -0.3526726854 | -1.3471761625 | 0.9609776274  |
| O | -2.370497865  | -1.9920193776 | -1.4313346817 |
| O | -3.1438576045 | -1.3905841706 | 0.6091065448  |
| N | -0.5652167728 | 0.353869492   | -0.598995496  |
| N | -2.2761705407 | 1.3543378111  | -1.4625163385 |
| C | 1.6008426387  | 0.0583763923  | 2.70560938    |
| C | -0.2748535037 | 1.6540057833  | 1.9746791047  |
| C | 1.0149298471  | 1.0647232433  | 1.7624482688  |
| C | 0.8618179168  | 3.0264519865  | 0.5858508154  |
| C | 1.2030116146  | 4.0771674832  | -0.246754367  |
| C | 1.7546428193  | 1.994504816   | 0.9434346656  |
| C | 3.0537489015  | 2.024623938   | 0.4233165763  |
| C | 3.41790334    | 3.0735494416  | -0.4299235503 |
| C | 2.508990731   | 4.0875156137  | -0.7621737503 |
| C | 0.2182621841  | -0.5362480002 | 0.2525183738  |
| C | -2.63096078   | -3.6673853348 | 0.2958154279  |
| C | -2.7027362873 | -2.2924970126 | -0.300306323  |
| C | -3.0701171312 | 0.0004035445  | 0.2890989948  |
| C | -4.262133121  | 0.4831304855  | -0.5853814638 |
| C | -3.7193494189 | 1.6384501536  | -1.4574381029 |
| C | -1.9032722259 | 0.4701745741  | -0.5392721642 |
| C | -0.0958689051 | 1.1838388029  | -1.6160554076 |
| C | -1.1759202572 | 1.8207298789  | -2.1528592288 |
| H | 2.0357225207  | 0.5315512807  | 3.5954637847  |
| H | 0.828603497   | -0.6419164994 | 3.0326259621  |
| H | 2.3923010142  | -0.5195114417 | 2.2177275456  |
| H | 0.4824119254  | 4.8492020394  | -0.4957395967 |
| H | 3.766499121   | 1.2468430263  | 0.6800869617  |
| H | 4.4237899498  | 3.1041994569  | -0.8392468221 |
| H | 2.8147146742  | 4.8919751882  | -1.4241845702 |
| H | -2.639637424  | -4.4141767121 | -0.4976724432 |
| H | -1.6823999703 | -3.7276914387 | 0.8394611753  |
| H | -3.4440172313 | -3.8393413712 | 1.0027508518  |
| H | 0.9535337356  | 1.2399060022  | -1.8449458041 |
| H | -1.2467956186 | 2.5507758364  | -2.9414004053 |
| H | -3.0217988917 | 0.4990128013  | 1.258647059   |

|   |               |               |               |
|---|---------------|---------------|---------------|
| H | -5.1106838465 | 0.7915793302  | 0.0244040186  |
| H | -4.5671619723 | -0.3486585476 | -1.2228387671 |
| H | -3.8826666889 | 2.6210946805  | -1.0089001967 |
| H | -4.1071144067 | 1.6374050727  | -2.476431868  |
| C | 1.9627119137  | -2.0127517717 | -0.39169202   |
| C | 1.1987102393  | -3.0933375736 | -0.8371556369 |
| C | 3.3007296607  | -2.1612206569 | -0.0388145651 |
| C | 1.7969134181  | -4.3516252217 | -0.9076247885 |
| C | 3.8889969462  | -3.4249271863 | -0.1249045772 |
| C | 3.138555933   | -4.5224866776 | -0.5523762474 |
| H | 0.1630498125  | -2.9452868418 | -1.1220960924 |
| H | 3.8611633911  | -1.2930856343 | 0.2901475228  |
| H | 1.2115685379  | -5.2001161262 | -1.2487893333 |
| H | 4.9327626716  | -3.5485979481 | 0.1467851563  |
| H | 3.5961524405  | -5.5049176258 | -0.6123655835 |
| H | 3.5961524405  | -5.5049176258 | -0.6123655835 |

TS 6-31G(d,p) 0021

E(RB3LYP) = -1488.74857708 A.U.

First frequency = -21.7886  $\text{cm}^{-1}$

|   |               |               |               |
|---|---------------|---------------|---------------|
| O | -0.8964828263 | 3.084637774   | -0.0292182574 |
| O | 1.3868201189  | 2.7531175931  | -0.0181095558 |
| O | 0.8958458713  | -0.150569815  | -1.3703773381 |
| O | -0.333720966  | -1.3206613114 | 0.1756044636  |
| O | -2.6237953852 | -2.1820614844 | 2.3164888989  |
| O | -3.1393132274 | -1.9605865338 | 0.1135430758  |
| N | -1.2810300065 | 0.3273770542  | -1.1440829726 |
| N | -3.2981675511 | 1.0532206632  | -1.437587375  |
| C | -0.9567194792 | 1.1286314102  | 2.4214162506  |
| C | 0.0613702516  | 2.5200899716  | 0.5211894612  |
| C | 0.1847728434  | 1.6254134068  | 1.5970830437  |
| C | 2.2630932327  | 2.0432087917  | 0.7536704224  |
| C | 3.6350763139  | 1.9887421898  | 0.5973160462  |
| C | 1.5705697911  | 1.3454959072  | 1.7788702757  |
| C | 2.3187771262  | 0.5828903297  | 2.6919054681  |
| C | 3.711838274   | 0.5255536815  | 2.5476522695  |
| C | 4.3651555973  | 1.2084737566  | 1.5140373107  |

|   |               |               |               |
|---|---------------|---------------|---------------|
| C | -0.1879905734 | -0.4604764483 | -0.6557938362 |
| C | -2.2774453526 | -4.0396328119 | 0.7998998086  |
| C | -2.6873837557 | -2.6533016225 | 1.2037416674  |
| C | -3.3643822995 | -0.5586317702 | 0.2802553898  |
| C | -4.8141413099 | -0.1794901089 | -0.1380321846 |
| C | -4.7122005503 | 1.0827908063  | -1.0289454611 |
| C | -2.558991051  | 0.2232348158  | -0.7124754348 |
| C | -1.2459510618 | 1.2762180003  | -2.1699938668 |
| C | -2.5174501314 | 1.724592594   | -2.3550862971 |
| H | -0.8559527878 | 1.3894085592  | 3.4844100801  |
| H | -1.8913367562 | 1.5745420314  | 2.0645809842  |
| H | -1.0549078295 | 0.0350399742  | 2.3716845614  |
| H | 4.1255627309  | 2.5297364807  | -0.2062660048 |
| H | 1.8225278696  | 0.0439168631  | 3.4945458209  |
| H | 4.2961000366  | -0.0659513631 | 3.2481235041  |
| H | 5.4446663677  | 1.141244946   | 1.4170322489  |
| H | -1.3202934148 | -3.9625639268 | 0.2744287724  |
| H | -2.1582018407 | -4.6616185939 | 1.6860024913  |
| H | -3.0055832342 | -4.4778181366 | 0.1142820456  |
| H | -0.3213274022 | 1.53900178    | -2.6509857175 |
| H | -2.9126504108 | 2.4657195713  | -3.0288450052 |
| H | -3.1264192263 | -0.2735382362 | 1.3052732075  |
| H | -5.4534706363 | -0.0153712363 | 0.7287762019  |
| H | -5.2161133971 | -1.0140807926 | -0.7162424036 |
| H | -4.8935688457 | 2.0078612086  | -0.4780561817 |
| H | -5.3551920815 | 1.0531572636  | -1.9085205655 |
| C | 2.0252505311  | -0.9978863983 | -1.3578874039 |
| C | 2.6434881246  | -1.385183572  | -0.1765341529 |
| C | 2.5098730146  | -1.3577220689 | -2.611329373  |
| C | 3.7892841164  | -2.1776864548 | -0.2655496697 |
| C | 3.6589623291  | -2.1466959579 | -2.6812226686 |
| C | 4.2975919272  | -2.5603461665 | -1.5089532948 |
| H | 2.2585172127  | -1.0554881593 | 0.7778857243  |
| H | 1.9931269434  | -1.0212221948 | -3.5034392287 |
| H | 4.2903460563  | -2.481212316  | 0.6480782743  |
| H | 4.0513544477  | -2.4357208691 | -3.6510126496 |
| H | 5.192271722   | -3.1724022274 | -1.5656538664 |
| H | 5.192271722   | -3.1724022274 | -1.5656538664 |

TS 6-31G(d,p) 0026  
E(RB3LYP) = -1488.74972912 A.U.  
First frequency = -177.2108 cm<sup>-1</sup>

|   |               |               |               |
|---|---------------|---------------|---------------|
| O | 3.5483989233  | 0.6456509678  | 0.8542053118  |
| O | 1.8204351777  | 1.176781569   | 2.2442414847  |
| O | 1.5010110318  | -0.6254592679 | -1.3839807214 |
| O | 0.3618180264  | -0.7835748431 | 0.6260971886  |
| O | -2.3349745977 | -2.0526448878 | -0.7578488765 |
| O | -2.3244740639 | -1.0582237906 | 1.2754400817  |
| N | -0.5585534261 | 0.3740834367  | -1.144331503  |
| N | -2.5563897855 | 1.143051418   | -1.4715944403 |
| C | 2.0975694759  | 2.3384185867  | -1.2732173024 |
| C | 2.4532339367  | 1.1715886267  | 0.9756717061  |
| C | 1.5634951202  | 1.7960775335  | 0.0211031772  |
| C | 0.6609650242  | 1.9053342446  | 2.1229949374  |
| C | -0.2307027642 | 2.1830400614  | 3.141682351   |
| C | 0.5005245485  | 2.381516162   | 0.8039058994  |
| C | -0.6054343122 | 3.1860941823  | 0.5075112971  |
| C | -1.5171839777 | 3.4912540569  | 1.5297814964  |
| C | -1.3404859406 | 2.9898926756  | 2.8249655801  |
| C | 0.5852893914  | -0.2104258716 | -0.4316454236 |
| C | -1.7235930744 | -3.33461019   | 1.200805171   |
| C | -2.1713827226 | -2.1181166585 | 0.4459699241  |
| C | -2.4822011215 | 0.2458881323  | 0.7072726719  |
| C | -3.9558279863 | 0.5500634142  | 0.3064936185  |
| C | -3.8959121636 | 1.448214069   | -0.9510892453 |
| C | -1.7685502236 | 0.5305756529  | -0.5854677832 |
| C | -0.6031268904 | 0.8928477097  | -2.4355176946 |
| C | -1.8583347185 | 1.3906519694  | -2.635206891  |
| H | 2.6393843415  | 1.5638265375  | -1.8223053317 |
| H | 1.2893549565  | 2.7104946252  | -1.9094973408 |
| H | 2.787277566   | 3.1761511885  | -1.1070623198 |
| H | -0.0735216144 | 1.7981144273  | 4.1435542305  |
| H | -0.7498767655 | 3.5752168316  | -0.4964733964 |
| H | -2.3746569485 | 4.1213963444  | 1.3115412817  |
| H | -2.0605711909 | 3.2305858375  | 3.600761083   |
| H | -0.6343281417 | -3.2640472756 | 1.2888737708  |

|   |               |               |               |
|---|---------------|---------------|---------------|
| H | -2.1505537678 | -3.3639255885 | 2.2042481898  |
| H | -1.9805181681 | -4.2330446848 | 0.6401095399  |
| H | 0.2520846576  | 0.8368289992  | -3.0851155599 |
| H | -2.3003407976 | 1.8740658937  | -3.4904635108 |
| H | -2.1185953929 | 0.9199392322  | 1.4842524251  |
| H | -4.5026037212 | 1.023450878   | 1.1215208393  |
| H | -4.4376641007 | -0.3979618544 | 0.0614848893  |
| H | -3.9455013324 | 2.513020632   | -0.7102010657 |
| H | -4.6552442385 | 1.2093811838  | -1.6961171482 |
| C | 2.0114650019  | -1.9175831147 | -1.2132728    |
| C | 1.16299941    | -3.0177917012 | -1.34069703   |
| C | 3.3728830942  | -2.0624648687 | -0.9745830494 |
| C | 1.7058141225  | -4.2987890392 | -1.2329658628 |
| C | 3.9050680891  | -3.3510237774 | -0.8825547084 |
| C | 3.076158883   | -4.4683122723 | -1.011326125  |
| H | 0.1014890391  | -2.8644274656 | -1.5074492046 |
| H | 3.9753961783  | -1.1729145257 | -0.833337036  |
| H | 1.0568283619  | -5.1644006121 | -1.3263853211 |
| H | 4.9675001777  | -3.4792368331 | -0.6985647703 |
| H | 3.4939207751  | -5.4673286473 | -0.9329811948 |
| H | 3.4939207751  | -5.4673286473 | -0.9329811948 |

TS 6-31G(d,p) 0027

E(RB3LYP) = -1488.74768329 A.U.

First frequency = -164.8348  $\text{cm}^{-1}$

|   |               |               |               |
|---|---------------|---------------|---------------|
| O | 1.0338169411  | 0.4340039736  | -2.7313428402 |
| O | 2.5688346714  | 1.4304838976  | -1.3808846187 |
| O | 0.1005899075  | -0.9980279777 | -0.2715028752 |
| O | 1.4928883608  | 0.1184022421  | 1.2118941306  |
| O | -1.9931037337 | -3.0563150986 | -1.297539404  |
| O | -2.630254951  | -0.8865006556 | -1.0781141171 |
| N | -0.8084690547 | 0.3996912897  | 1.3195446655  |
| N | -2.8466104731 | 0.5721524158  | 2.0360453415  |
| C | -1.0842317914 | 2.0395970543  | -1.166721     |
| C | 1.2405726577  | 1.1435417976  | -1.7571202528 |
| C | 0.3463007201  | 1.7628699628  | -0.7971204704 |
| C | 2.5145132766  | 2.3803796885  | -0.3811231139 |



|   |               |               |               |
|---|---------------|---------------|---------------|
| C | 3.6069060122  | 2.9991650393  | 0.1988930334  |
| C | 1.1828252132  | 2.6896162083  | -0.0525884342 |
| C | 0.9369229348  | 3.6867837999  | 0.8937169414  |
| C | 2.0265089283  | 4.3302190083  | 1.4964405369  |
| C | 3.3416833664  | 3.9867192669  | 1.1606561536  |
| C | 0.4462958448  | 0.0564743848  | 0.5801658187  |
| C | -1.7180351933 | -1.5163640161 | -3.1510003445 |
| C | -2.1131676421 | -1.9494632968 | -1.7723310906 |
| C | -2.8262326419 | -1.0455837672 | 0.3241391222  |
| C | -4.2929490808 | -0.7023444504 | 0.7053225946  |
| C | -4.2353750009 | 0.0848500496  | 2.0349602547  |
| C | -2.0665975561 | -0.0284137325 | 1.1291597547  |
| C | -0.807719313  | 1.2974197269  | 2.3769687239  |
| C | -2.0915085625 | 1.403161066   | 2.8346049867  |
| H | -1.5721638469 | 1.1447472644  | -1.5546927328 |
| H | -1.652835206  | 2.3877725795  | -0.2977808645 |
| H | -1.1553217324 | 2.8235810877  | -1.931236483  |
| H | 4.6193861467  | 2.7337444934  | -0.0858291191 |
| H | -0.080931743  | 3.962032664   | 1.1538267158  |
| H | 1.8483110186  | 5.1098920801  | 2.2313274821  |
| H | 4.171269538   | 4.4969165624  | 1.6407260245  |
| H | -0.8395554221 | -0.8663481363 | -3.0589669348 |
| H | -1.4776412383 | -2.3901305865 | -3.7555408487 |
| H | -2.5198879649 | -0.9372624677 | -3.6156823383 |
| H | 0.1091643079  | 1.7682158276  | 2.6860462355  |
| H | -2.5129964062 | 1.9824506036  | 3.6392026815  |
| H | -2.5334784583 | -2.058110411  | 0.6136109962  |
| H | -4.91170105   | -1.5958785742 | 0.7834024348  |
| H | -4.6941563338 | -0.0676313748 | -0.088043614  |
| H | -4.3852222822 | -0.5509777057 | 2.9103444928  |
| H | -4.9298653333 | 0.9243311862  | 2.0767606608  |
| C | 0.9439417244  | -2.1126521306 | -0.2633261361 |
| C | 0.9945994673  | -2.9351256934 | 0.8617110931  |
| C | 1.6572921895  | -2.4139442027 | -1.4187326129 |
| C | 1.7788864363  | -4.087894514  | 0.823433612   |
| C | 2.4323839606  | -3.5761057066 | -1.4480797126 |
| C | 2.4969713689  | -4.4127694198 | -0.3315713563 |
| H | 0.4236393473  | -2.6710788936 | 1.745415484   |

|   |              |               |               |
|---|--------------|---------------|---------------|
| H | 1.6032860174 | -1.7315441213 | -2.2589236217 |
| H | 1.8243375774 | -4.7347667232 | 1.6944796315  |
| H | 2.9913654281 | -3.822782953  | -2.3459132796 |
| H | 3.1037537146 | -5.3127012176 | -0.3589708717 |
| H | 3.1037537146 | -5.3127012176 | -0.3589708717 |

TS 6-31G(d,p) 0028

E(RB3LYP) = -1488.74719868 A.U.

First frequency = -178.5349  $\text{cm}^{-1}$

|   |               |               |               |
|---|---------------|---------------|---------------|
| O | 1.3022775212  | 0.3423007762  | -2.5312790824 |
| O | 2.7277283797  | 1.3662971767  | -1.0847293337 |
| O | 0.1137053389  | -1.0556961983 | -0.1673554238 |
| O | 1.3448382308  | 0.0932903175  | 1.4356511531  |
| O | -2.3035713255 | -2.9733084254 | -1.6951380373 |
| O | -2.5055397841 | -0.7408586824 | -1.3520738976 |
| N | -0.9500682123 | 0.3851849847  | 1.2711397194  |
| N | -3.0502765723 | 0.6281454869  | 1.75214048    |
| C | -0.9074941319 | 2.0610362233  | -1.2080157429 |
| C | 1.427518314   | 1.0781529169  | -1.5677857845 |
| C | 0.461459489   | 1.7159533076  | -0.6875840479 |
| C | 2.5967681685  | 2.3182100257  | -0.0925172621 |
| C | 3.6421505487  | 2.9286996888  | 0.575883896   |
| C | 1.2460900699  | 2.6346652133  | 0.1256180217  |
| C | 0.9285326251  | 3.6310687546  | 1.0499953053  |
| C | 1.9684845255  | 4.2670388881  | 1.7422348095  |
| C | 3.3044419466  | 3.916260418   | 1.5147721827  |
| C | 0.3835564623  | 0.0299246768  | 0.6779138746  |
| C | -1.5142235408 | -1.4061849788 | -3.3734969583 |
| C | -2.1400022867 | -1.8365052679 | -2.0816746722 |
| C | -2.8959715222 | -0.9394646133 | 0.0039412574  |
| C | -4.3815143612 | -0.5344599096 | 0.2163040983  |
| C | -4.4490119925 | 0.2090827006  | 1.5700754523  |
| C | -2.1930360974 | 0.0130388022  | 0.9279531761  |
| C | -1.0393751016 | 1.2640885228  | 2.3405921092  |
| C | -2.3625185933 | 1.4131424288  | 2.6506442905  |
| H | -1.5663218926 | 2.3875809742  | -0.396302876  |
| H | -0.858254429  | 2.8861825839  | -1.9296864604 |

|   |               |               |               |
|---|---------------|---------------|---------------|
| H | -1.3717287179 | 1.2071271823  | -1.6994758553 |
| H | 4.6729691329  | 2.6573263249  | 0.3748811392  |
| H | -0.1058100532 | 3.9107270774  | 1.2268653224  |
| H | 1.7349823333  | 5.045646644   | 2.4625436865  |
| H | 4.0948194196  | 4.4200142538  | 2.0629552189  |
| H | -0.5785442542 | -0.8830290211 | -3.1432269333 |
| H | -1.3227785265 | -2.2780732102 | -3.9975512332 |
| H | -2.1693861964 | -0.702256121  | -3.8937071869 |
| H | -0.1473191821 | 1.6927125684  | 2.7631405117  |
| H | -2.8520316722 | 1.9940249275  | 3.4145060413  |
| H | -2.6964116187 | -1.9748751272 | 0.2894599248  |
| H | -5.0454758648 | -1.3980296857 | 0.1867855411  |
| H | -4.6520831244 | 0.1431833887  | -0.5966359012 |
| H | -4.7311102863 | -0.444637712  | 2.3984127999  |
| H | -5.1051786681 | 1.0796782346  | 1.5589325369  |
| C | 1.0309463722  | -2.1051236853 | -0.2241067434 |
| C | 0.4873672239  | -3.3892606982 | -0.180581721  |
| C | 2.4060546707  | -1.9112897828 | -0.3745950634 |
| C | 1.329025226   | -4.4966497358 | -0.2985428862 |
| C | 3.2353958053  | -3.029177571  | -0.4789257088 |
| C | 2.7065814018  | -4.3220258853 | -0.4437774399 |
| H | -0.584075166  | -3.507482865  | -0.0776560453 |
| H | 2.8153159972  | -0.9122115827 | -0.4067851703 |
| H | 0.9029600109  | -5.4952725336 | -0.271626243  |
| H | 4.3054278693  | -2.8828197784 | -0.5945749805 |
| H | 3.3616335369  | -5.1834447886 | -0.5314625898 |
| H | 3.3616335369  | -5.1834447886 | -0.5314625898 |

TS 6-31G(d,p) 0030

E(RB3LYP) = -1488.74981740 A.U.

First frequency = -223.3558  $\text{cm}^{-1}$

|   |               |               |               |
|---|---------------|---------------|---------------|
| O | -0.9649333998 | 1.530457453   | 2.4830492259  |
| O | -0.1868370813 | 2.8758084922  | 0.8237855784  |
| O | 1.1482370914  | -0.8069675811 | -0.7909859156 |
| O | -0.2583713409 | -1.3891165239 | 0.9819067604  |
| O | -3.9010413465 | -1.4603433882 | -1.3618256598 |
| O | -3.2647110633 | -1.6265117067 | 0.8055777053  |

|   |               |               |               |
|---|---------------|---------------|---------------|
| N | -0.8476696517 | 0.2223993155  | -0.5719601262 |
| N | -2.7287022025 | 1.233591289   | -0.9315874793 |
| C | 1.8148028176  | 0.1608729155  | 2.3575258843  |
| C | -0.0663417221 | 1.7550129614  | 1.6836990305  |
| C | 1.1295386229  | 1.0175319277  | 1.3266253042  |
| C | 0.9650384559  | 2.9377934123  | 0.067033606   |
| C | 1.2592205305  | 3.9157754837  | -0.8668534213 |
| C | 1.8223629346  | 1.8635610151  | 0.367268374   |
| C | 3.0473702076  | 1.7798494002  | -0.2998051581 |
| C | 3.3688858226  | 2.7556163057  | -1.251083404  |
| C | 2.4876221788  | 3.807277792   | -1.5361712481 |
| C | 0.1604137293  | -0.5811231427 | 0.1585407576  |
| C | -3.82669753   | -3.6301903817 | -0.2841139371 |
| C | -3.6867814617 | -2.1348156726 | -0.3736214228 |
| C | -2.9972134613 | -0.2111456113 | 0.9220839095  |
| C | -4.2461132063 | 0.7064684949  | 0.7743696136  |
| C | -4.1513326414 | 1.403855492   | -0.6066227334 |
| C | -2.1133006579 | 0.3499298013  | -0.1468655191 |
| C | -0.6753345668 | 1.044154725   | -1.680305674  |
| C | -1.866551298  | 1.6771693701  | -1.9082432564 |
| H | 2.6410804659  | -0.3999194264 | 1.9132114729  |
| H | 2.2194971054  | 0.7657889589  | 3.1783744356  |
| H | 1.1073299145  | -0.5591036098 | 2.7754866644  |
| H | 0.5649480184  | 4.7246671797  | -1.0679453957 |
| H | 3.7327279395  | 0.9655573431  | -0.0896220674 |
| H | 4.3177742331  | 2.6969112259  | -1.7764919254 |
| H | 2.7565794066  | 4.551353688   | -2.2796596096 |
| H | -2.8431207775 | -4.0719185208 | -0.098701441  |
| H | -4.4719270759 | -3.8982285225 | 0.556379848   |
| H | -4.2382539817 | -4.0153933878 | -1.21593214   |
| H | 0.2746955555  | 1.1119214936  | -2.1792398593 |
| H | -2.1502932411 | 2.3971512088  | -2.6575260808 |
| H | -2.5216906645 | -0.1231978204 | 1.8942497402  |
| H | -4.2089520455 | 1.4548126406  | 1.5684199384  |
| H | -5.1658456853 | 0.1316687409  | 0.8831521189  |
| H | -4.3999556771 | 2.4648172498  | -0.5703851411 |
| H | -4.7430694218 | 0.9026859457  | -1.3731150021 |
| C | 2.2012700079  | -1.6886653845 | -0.6106124508 |

|   |              |               |               |
|---|--------------|---------------|---------------|
| C | 3.2868440612 | -1.4587118597 | -1.4624361852 |
| C | 2.2105343194 | -2.7625920545 | 0.2852686381  |
| C | 4.3942667491 | -2.3023468605 | -1.4148163281 |
| C | 3.3343697953 | -3.592638916  | 0.324898463   |
| C | 4.4258507745 | -3.3731072708 | -0.5166554936 |
| H | 3.2466146772 | -0.613329904  | -2.1402671691 |
| H | 1.3649825917 | -2.9317474459 | 0.9346048821  |
| H | 5.2345067686 | -2.1177184392 | -2.0773481709 |
| H | 3.3465176595 | -4.4237013427 | 1.024018481   |
| H | 5.2905807494 | -4.0278095798 | -0.4747488159 |
| H | 5.2905807494 | -4.0278095798 | -0.4747488159 |

TS 6-31G(d,p) 0036

E(RB3LYP) = -1488.74679512 A.U.

First frequency = -212.7442  $\text{cm}^{-1}$

|   |               |               |               |
|---|---------------|---------------|---------------|
| O | 2.2322927764  | -0.0958781347 | 2.7213657968  |
| O | 0.5744010425  | 1.4466967929  | 2.6073971101  |
| O | 1.594690119   | -1.156817643  | -1.0052651448 |
| O | 0.1441315208  | -1.249963358  | 0.8142772747  |
| O | -3.5680597201 | -1.2099520643 | -1.2789353419 |
| O | -2.8467471867 | -0.9206997039 | 0.8484673727  |
| N | -0.2815195305 | 0.1204819718  | -1.0105805707 |
| N | -2.0173550805 | 1.2882364617  | -1.5774396729 |
| C | 3.1117513292  | 0.988319331   | -0.041273905  |
| C | 1.6409980666  | 0.7142508389  | 2.0372982495  |
| C | 1.7551746453  | 1.063861338   | 0.6182158045  |
| C | 0.1846629229  | 2.391049298   | 1.679503418   |
| C | -0.7814030148 | 3.3598534689  | 1.8841533741  |
| C | 0.9108655559  | 2.2547447773  | 0.4834920117  |
| C | 0.6840229583  | 3.1730569646  | -0.5429198852 |
| C | -0.2924402748 | 4.1637731361  | -0.3655758086 |
| C | -1.0223319083 | 4.251377092   | 0.8244919815  |
| C | 0.6618604009  | -0.613899649  | -0.1027493721 |
| C | -3.7091930763 | -3.0369161569 | 0.3081678408  |
| C | -3.3901378516 | -1.6428793825 | -0.1574306046 |
| C | -2.3731492405 | 0.4182587111  | 0.5921898922  |
| C | -3.4845231022 | 1.4505519721  | 0.242457295   |

|   |               |               |               |
|---|---------------|---------------|---------------|
| C | -3.3727797237 | 1.7613843233  | -1.2713121568 |
| C | -1.4795311724 | 0.5524229352  | -0.6023177951 |
| C | -0.0652183095 | 0.5981329216  | -2.2937380068 |
| C | -1.167608178  | 1.3258707809  | -2.655877885  |
| H | 3.6304460495  | 0.0724499978  | 0.2482916652  |
| H | 3.0178417731  | 0.9869688407  | -1.1304250493 |
| H | 3.7384828301  | 1.8425727076  | 0.2431580437  |
| H | -1.3172664239 | 3.4283428454  | 2.8246680689  |
| H | 1.2458725965  | 3.1137615934  | -1.4690393109 |
| H | -0.4828149965 | 4.8751687727  | -1.163452688  |
| H | -1.7745411655 | 5.0251589227  | 0.9421804803  |
| H | -4.3104332726 | -3.0035713726 | 1.2200628327  |
| H | -4.2389407181 | -3.5732076341 | -0.4778450621 |
| H | -2.7744380607 | -3.5526849189 | 0.5476543703  |
| H | 0.8456466937  | 0.3794721011  | -2.8227740667 |
| H | -1.3941589419 | 1.8606777505  | -3.5631529574 |
| H | -1.8480761468 | 0.6660686668  | 1.5109701551  |
| H | -3.2920719284 | 2.3581921155  | 0.8173824568  |
| H | -4.4675708601 | 1.0659100716  | 0.5135436974  |
| H | -3.4517777568 | 2.8255036449  | -1.4948796399 |
| H | -4.0830852227 | 1.1929726339  | -1.8722410847 |
| C | 2.3041646993  | -2.2995599166 | -0.6803791515 |
| C | 2.6098004123  | -3.1334695529 | -1.7590936417 |
| C | 2.7585547657  | -2.5936531662 | 0.6082453915  |
| C | 3.3784854815  | -4.2780137965 | -1.5489746091 |
| C | 3.519820216   | -3.7491639563 | 0.8014094183  |
| C | 3.8341338358  | -4.5932694899 | -0.2660880315 |
| H | 2.2405967656  | -2.8726889483 | -2.7455770292 |
| H | 2.5245941043  | -1.9323043232 | 1.4324646006  |
| H | 3.6161915661  | -4.9239996601 | -2.3889969839 |
| H | 3.8745328643  | -3.9838330077 | 1.8009467219  |
| H | 4.4300524097  | -5.4856568741 | -0.1013075616 |
| H | 4.4300524097  | -5.4856568741 | -0.1013075616 |

TS 6-31G(d,p) 0039

E(RB3LYP) = -1488.75031529 A.U.

First frequency = -225.7951  $\text{cm}^{-1}$

|   |               |               |               |
|---|---------------|---------------|---------------|
| O | -1.2475806834 | 2.0696887247  | -0.9348961782 |
| O | 0.8232890284  | 1.3295207352  | -1.5554972369 |
| O | 0.3404020432  | -0.8047693441 | 0.5323117561  |
| O | 0.520959554   | 0.1098158591  | 2.6719273677  |
| O | -3.4259502884 | 0.4737476346  | -2.2444800291 |
| O | -1.6896219794 | -0.9103233193 | -1.7656558435 |
| N | -1.4551401532 | 0.1863649187  | 1.4582685214  |
| N | -3.5481845053 | -0.0487660316 | 0.9395544607  |
| C | 0.1551271992  | 2.9945505528  | 1.7005311521  |
| C | -0.0790349099 | 1.8853205478  | -0.6085185657 |
| C | 0.6101225498  | 2.0382708353  | 0.640776423   |
| C | 2.0596075999  | 1.2561401296  | -0.9540839538 |
| C | 3.2194511163  | 0.789466657   | -1.5437794183 |
| C | 1.9982150437  | 1.7236907098  | 0.371466214   |
| C | 3.1653506454  | 1.7378181868  | 1.1383828914  |
| C | 4.353409594   | 1.271124329   | 0.5627174811  |
| C | 4.3806348688  | 0.7969224285  | -0.7546612823 |
| C | 0.0158623054  | 0.0444196633  | 1.5598789907  |
| C | -1.5059171046 | 0.3795497217  | -3.7200015836 |
| C | -2.3306013798 | 0.031361511   | -2.5145476832 |
| C | -2.2770735919 | -1.3779277011 | -0.5413534083 |
| C | -3.7778810436 | -1.8021133942 | -0.5950821627 |
| C | -4.592291133  | -0.7124083345 | 0.1414564084  |
| C | -2.304242781  | -0.3672419291 | 0.5714734746  |
| C | -2.2027637287 | 0.8856930249  | 2.3941618247  |
| C | -3.5206119463 | 0.7441318872  | 2.0641016018  |
| H | -0.9175787191 | 3.1853109627  | 1.6120680403  |
| H | 0.3631399837  | 2.5918769989  | 2.6992179183  |
| H | 0.6734676008  | 3.9586161317  | 1.621488318   |
| H | 3.2229968814  | 0.4259871692  | -2.5658251059 |
| H | 3.1447775855  | 2.0912729127  | 2.164760522   |
| H | 5.2679125921  | 1.2688113299  | 1.1490410478  |
| H | 5.3117500754  | 0.4312197068  | -1.1769215267 |
| H | -0.5512498088 | 0.7864394095  | -3.3825143535 |
| H | -1.3085019849 | -0.5212530872 | -4.3082721096 |
| H | -2.0412650041 | 1.1111719194  | -4.323900738  |
| H | -1.72482504   | 1.3926661302  | 3.2133483942  |
| H | -4.4120868974 | 1.1202801285  | 2.5376504612  |

|   |               |               |               |
|---|---------------|---------------|---------------|
| H | -1.6356131899 | -2.2148139927 | -0.2720964069 |
| H | -3.8743999667 | -2.7527911055 | -0.0657183779 |
| H | -4.114021444  | -1.9415235181 | -1.6208149952 |
| H | -5.3506182788 | -1.1218666197 | 0.8094504832  |
| H | -5.0346454788 | 0.0131981228  | -0.5390858371 |
| C | 1.4786896945  | -1.5952201683 | 0.4590574542  |
| C | 2.4855053155  | -1.6667140371 | 1.4215642062  |
| C | 1.5370656758  | -2.3582410112 | -0.7112969535 |
| C | 3.5602882214  | -2.5305123109 | 1.1937850341  |
| C | 2.6147680533  | -3.2154659306 | -0.916955537  |
| C | 3.6326429375  | -3.3080001316 | 0.0374552194  |
| H | 2.437392124   | -1.0499886898 | 2.3054015529  |
| H | 0.7443999475  | -2.2469283072 | -1.444012394  |
| H | 4.3514435654  | -2.5865529144 | 1.935757402   |
| H | 2.6609764162  | -3.8065521275 | -1.8267341345 |
| H | 4.4753656348  | -3.9730289838 | -0.1233780601 |
| H | 4.4753656348  | -3.9730289838 | -0.1233780601 |

TS 6-31G(d,p) 0040

E(RB3LYP) = -1488.74725363 A.U.

First frequency = -208.3053  $\text{cm}^{-1}$

|   |               |               |               |
|---|---------------|---------------|---------------|
| O | 1.9238677507  | -0.3432847279 | 2.6102321897  |
| O | 0.3011143164  | 1.2386269918  | 2.5079445988  |
| O | 1.5766259481  | -1.0640923286 | -1.2315967257 |
| O | -0.0084691198 | -1.3018335214 | 0.4536964859  |
| O | -2.8042248854 | -1.3010007038 | 2.2721910248  |
| O | -2.9711786538 | -0.9199574941 | 0.0391381588  |
| N | -0.2788666051 | 0.2376823569  | -1.2620812639 |
| N | -1.9825197216 | 1.4377003136  | -1.8624512295 |
| C | 3.0355788559  | 0.973967186   | 0.0285233326  |
| C | 1.4039395887  | 0.5415860176  | 1.9595704102  |
| C | 1.6388525432  | 1.0211463501  | 0.5981791453  |
| C | -0.0087942661 | 2.2634349744  | 1.6392709738  |
| C | -0.9834051983 | 3.222368256   | 1.8494055986  |
| C | 0.8102743818  | 2.2221734845  | 0.4963594095  |
| C | 0.660636355   | 3.2205949289  | -0.4685214309 |
| C | -0.3248401326 | 4.2011344221  | -0.2851422672 |



|   |               |               |               |
|---|---------------|---------------|---------------|
| C | -1.1402241489 | 4.200102385   | 0.8517593844  |
| C | 0.5780095374  | -0.5984343092 | -0.3677076616 |
| C | -3.1668776724 | -3.1531489467 | 0.7538416088  |
| C | -2.9668056891 | -1.7169915795 | 1.1471597577  |
| C | -2.4677455968 | 0.4193476675  | 0.2076582877  |
| C | -3.5410646987 | 1.4933478734  | -0.1073537664 |
| C | -3.3528457192 | 1.9024469334  | -1.5924447997 |
| C | -1.4928041565 | 0.6592424188  | -0.8951074983 |
| C | 0.0126433799  | 0.7897993521  | -2.5006891132 |
| C | -1.0677832396 | 1.5386803738  | -2.8854120509 |
| H | 3.0174761945  | 1.055886146   | -1.061615812  |
| H | 3.6510339897  | 1.7943497705  | 0.4183554213  |
| H | 3.5240278643  | 0.0310450406  | 0.2815526561  |
| H | -1.5909254791 | 3.216866974   | 2.7478840912  |
| H | 1.2900796704  | 3.2312883057  | -1.352263992  |
| H | -0.4541419017 | 4.9754953125  | -1.0352827351 |
| H | -1.8964751124 | 4.9689700931  | 0.9758407807  |
| H | -2.221396808  | -3.5133458464 | 0.3349643872  |
| H | -3.4259249104 | -3.745486549  | 1.6305541177  |
| H | -3.9343743373 | -3.2459945288 | -0.0173167773 |
| H | 0.9512547724  | 0.5969187761  | -2.9899241055 |
| H | -1.2423613804 | 2.1226883992  | -3.7736855189 |
| H | -2.0362217027 | 0.5175457899  | 1.2008781746  |
| H | -3.3592484631 | 2.3576970032  | 0.533673506   |
| H | -4.5406254917 | 1.1071306387  | 0.0916831598  |
| H | -3.4161733879 | 2.9795268581  | -1.7487892164 |
| H | -4.0402385219 | 1.3954388839  | -2.272881483  |
| C | 2.2594339985  | -2.2365805698 | -0.9496230448 |
| C | 2.6166023631  | -2.6354219099 | 0.3409783678  |
| C | 2.6412944066  | -2.9817029025 | -2.0675930281 |
| C | 3.3594709575  | -3.8086497101 | 0.4949036784  |
| C | 3.390112537   | -4.1456369829 | -1.8949913763 |
| C | 3.7494165145  | -4.5663348982 | -0.6118178269 |
| H | 2.3243604134  | -2.0399513072 | 1.1965509111  |
| H | 2.3463232738  | -2.6391620945 | -3.0540249432 |
| H | 3.6395314405  | -4.1258146364 | 1.4953000187  |
| H | 3.6878012523  | -4.7237849329 | -2.7647382393 |
| H | 4.329961327   | -5.4736865295 | -0.476634524  |

H 4.329961327 -5.4736865295 -0.476634524

TS 6-311++G(d,p) 0008

E(RB3LYP) = -1489.12290032 A.U.

First frequency = -233.1518  $\text{cm}^{-1}$

|   |               |               |               |
|---|---------------|---------------|---------------|
| O | -1.7379126748 | 2.5489114375  | 0.2869608716  |
| O | 0.03272422    | 2.2758582456  | -1.1130426188 |
| O | 0.3777411167  | -0.6512335485 | 0.2934480272  |
| O | 0.764355888   | -0.3550815836 | 2.5589346566  |
| O | -0.8757276448 | -1.8018086251 | -2.7298789486 |
| O | -1.9623666502 | -0.1624205645 | -1.6131717548 |
| N | -1.3604179704 | -0.0829850555 | 1.6675680551  |
| N | -3.4852534874 | -0.1929814857 | 1.2644978211  |
| C | 0.4086524697  | 2.5981564275  | 2.5496774267  |
| C | -0.5412825464 | 2.3338038227  | 0.1819921502  |
| C | 0.4836146509  | 2.046399968   | 1.1547415396  |
| C | 1.3867672229  | 2.0888564781  | -0.9581045398 |
| C | 2.3158315346  | 2.0511763906  | -1.979539178  |
| C | 1.7218275438  | 1.9732388237  | 0.400342274   |
| C | 3.0613133708  | 1.8035563658  | 0.7499413945  |
| C | 4.0224822158  | 1.7519548312  | -0.266308688  |
| C | 3.6583984184  | 1.8741250426  | -1.6107468509 |
| C | 0.1136710657  | -0.1393028008 | 1.5523365123  |
| C | -0.9579745519 | 0.4286546649  | -3.657147949  |
| C | -1.226868476  | -0.6479269666 | -2.6485255469 |
| C | -2.343634337  | -1.0920004223 | -0.5852976037 |
| C | -3.8527940749 | -1.4503417678 | -0.6715303517 |
| C | -4.584231581  | -0.549593088  | 0.3515847642  |
| C | -2.2779065114 | -0.4243509617 | 0.7496894869  |
| C | -2.0271325963 | 0.3792967171  | 2.7923214832  |
| C | -3.3655313887 | 0.3163887723  | 2.5371406502  |
| H | -0.627012973  | 2.7835133931  | 2.8396624066  |
| H | 0.8575195694  | 1.9060727716  | 3.2685275799  |
| H | 0.9477501552  | 3.5495139371  | 2.6221541165  |
| H | 2.017950648   | 2.1540354366  | -3.0158460823 |
| H | 3.3512522873  | 1.7102528909  | 1.7901722177  |
| H | 5.066532851   | 1.6147330516  | -0.0079402273 |

|   |               |               |               |
|---|---------------|---------------|---------------|
| H | 4.4194632829  | 1.8323692011  | -2.3813946378 |
| H | -0.1718862217 | 0.103589024   | -4.3356607632 |
| H | -1.874168736  | 0.6083011727  | -4.2269466242 |
| H | -0.6852056681 | 1.3531381272  | -3.1513574167 |
| H | -1.4862521842 | 0.6932814549  | 3.6655177544  |
| H | -4.2128778785 | 0.5765154473  | 3.1463586561  |
| H | -1.7001582106 | -1.9660609884 | -0.6394926738 |
| H | -3.9805588297 | -2.4978540821 | -0.3969779908 |
| H | -4.2213664083 | -1.3107378094 | -1.6858840409 |
| H | -5.3697112941 | -1.068361144  | 0.8970526767  |
| H | -4.9873383732 | 0.3633514603  | -0.0875704054 |
| C | 1.3660819385  | -1.6264435147 | 0.1499215645  |
| C | 1.365515168   | -2.7812918555 | 0.9283986645  |
| C | 2.290684515   | -1.439636592  | -0.868975338  |
| C | 2.325529017   | -3.7613091289 | 0.6798274388  |
| C | 3.2398770307  | -2.4302808317 | -1.114047985  |
| C | 3.2632988443  | -3.5908865616 | -0.3400291676 |
| H | 0.6333177222  | -2.9061684997 | 1.7151603026  |
| H | 2.2606413983  | -0.5277216552 | -1.4482880205 |
| H | 2.3349280244  | -4.6620643788 | 1.2829730083  |
| H | 3.9641543193  | -2.2893960751 | -1.9082354728 |
| H | 4.0051559566  | -4.3579217303 | -0.5297723059 |
| H | 4.0051559566  | -4.3579217303 | -0.5297723059 |

TS 6-311++G(d,p) 0016

E(RB3LYP) = -1489.11972959 A.U.

First frequency = -255.6951  $\text{cm}^{-1}$

|   |               |               |               |
|---|---------------|---------------|---------------|
| O | -1.3690039976 | 2.2152556871  | -0.5422360839 |
| O | 0.711406383   | 1.7159802195  | -1.3146225571 |
| O | 0.4161102162  | -0.7851153348 | 0.3365241059  |
| O | 0.604375549   | -0.2914756779 | 2.6027062864  |
| O | -3.5360850352 | 0.6271362208  | -2.0062031018 |
| O | -1.7028491041 | -0.6889618908 | -1.8626221573 |
| N | -1.4175582333 | -0.1214358932 | 1.4761215939  |
| N | -3.5012372334 | -0.4825669095 | 1.0009770005  |
| C | 0.0455059367  | 2.6995659029  | 2.2001486232  |
| C | -0.1953241735 | 2.0213509026  | -0.2687204797 |

|   |               |               |               |
|---|---------------|---------------|---------------|
| C | 0.5103055398  | 1.9566057253  | 0.9833982822  |
| C | 1.965488193   | 1.6038669099  | -0.7556144191 |
| C | 3.1347276758  | 1.3398196585  | -1.4392822644 |
| C | 1.9097297008  | 1.7986321329  | 0.6330554276  |
| C | 3.0921270731  | 1.7586249203  | 1.3706593103  |
| C | 4.2923812931  | 1.5003887361  | 0.7001625728  |
| C | 4.3135924153  | 1.2836911847  | -0.6810409903 |
| C | 0.0730619433  | -0.1585539811 | 1.5129330124  |
| C | -1.7076289089 | 0.9292818234  | -3.5621014362 |
| C | -2.4381254698 | 0.3192528294  | -2.4039249369 |
| C | -2.1925244591 | -1.4175283939 | -0.7206979335 |
| C | -3.6494286797 | -1.9623079828 | -0.8089145894 |
| C | -4.5200750592 | -1.107461946  | 0.1404946044  |
| C | -2.254884618  | -0.6185223996 | 0.5481777533  |
| C | -2.1798696549 | 0.348581867   | 2.5345865092  |
| C | -3.4917224778 | 0.1285469504  | 2.2334235417  |
| H | 0.324409164   | 2.1593298098  | 3.1103869614  |
| H | 0.5043856717  | 3.693383198   | 2.2535187613  |
| H | -1.0372302047 | 2.8343573817  | 2.1871738699  |
| H | 3.1370059683  | 1.1798794195  | -2.5105072286 |
| H | 3.0775873519  | 1.9115430306  | 2.4435476277  |
| H | 5.2199199047  | 1.4566214644  | 1.260176552   |
| H | 5.2534680356  | 1.0721697989  | -1.177916317  |
| H | -0.729646928  | 1.2714214727  | -3.2238062145 |
| H | -1.5596855137 | 0.1750585207  | -4.3390507525 |
| H | -2.2859356565 | 1.7614492344  | -3.9573622923 |
| H | -1.7165071142 | 0.7698136493  | 3.4069349908  |
| H | -4.3880455941 | 0.3388161281  | 2.7895374985  |
| H | -1.4715427799 | -2.2237344659 | -0.6260179749 |
| H | -3.6382962045 | -2.9972794574 | -0.4655599375 |
| H | -4.0179549992 | -1.9431196094 | -1.8312105824 |
| H | -5.1918469062 | -1.7046138391 | 0.7546241156  |
| H | -5.0728019877 | -0.328729688  | -0.3790618892 |
| C | 1.5688005548  | -1.5227911376 | 0.1117238959  |
| C | 2.6294330115  | -1.6715498881 | 1.0018292127  |
| C | 1.593936217   | -2.1286168447 | -1.1466282595 |
| C | 3.7180153323  | -2.4559574788 | 0.6156483462  |
| C | 2.6874644641  | -2.9050900356 | -1.5138080396 |

|   |              |               |               |
|---|--------------|---------------|---------------|
| C | 3.7560291211 | -3.0769118795 | -0.6310260029 |
| H | 2.6143643244 | -1.1728498796 | 1.9566119172  |
| H | 0.7624642051 | -1.9643093127 | -1.8214340977 |
| H | 4.5484513317 | -2.5702314337 | 1.3034152476  |
| H | 2.7057463082 | -3.3715886838 | -2.4922995579 |
| H | 4.6103450513 | -3.679462354  | -0.9165275724 |
| H | 4.6103450513 | -3.679462354  | -0.9165275724 |

TS 6-311++G(d,p) 0017

E(RB3LYP) = -1489.12159437 A.U.

First frequency = -203.9372  $\text{cm}^{-1}$

|   |               |               |               |
|---|---------------|---------------|---------------|
| O | 3.6328326128  | 1.019822306   | 0.2813203528  |
| O | 2.0528088806  | 1.3868335798  | 1.8691859409  |
| O | 1.5064813681  | -0.4904758528 | -1.6387494679 |
| O | 0.5021289747  | -0.6761497312 | 0.4392927304  |
| O | -1.715262085  | -1.2849585656 | 2.9218106872  |
| O | -2.3839659196 | -1.3035266853 | 0.7608244959  |
| N | -0.6191617551 | 0.3471439574  | -1.2988553156 |
| N | -2.7000724869 | 0.9213717512  | -1.4982364804 |
| C | 1.7583093435  | 2.5207289533  | -1.6474661794 |
| C | 2.5136442753  | 1.4206328746  | 0.5364839052  |
| C | 1.4453720551  | 1.922551322   | -0.305507745  |
| C | 0.8234823977  | 2.0060267674  | 1.8994370228  |
| C | 0.0563267505  | 2.2254349581  | 3.0242445342  |
| C | 0.4497812414  | 2.435052333   | 0.613558135   |
| C | -0.741432591  | 3.1462391076  | 0.4589917042  |
| C | -1.5292098115 | 3.3973102486  | 1.5901722909  |
| C | -1.1454794804 | 2.9322056352  | 2.8503310101  |
| C | 0.6290528784  | -0.1035392161 | -0.6312253154 |
| C | -1.7494245832 | -3.3667958827 | 1.6934083755  |
| C | -1.9353957047 | -1.8926781388 | 1.9028574358  |
| C | -2.3411720805 | 0.1387790094  | 0.6925013303  |
| C | -3.7586020098 | 0.7581640713  | 0.5954319751  |
| C | -4.0474208718 | 1.0073477152  | -0.9083325609 |
| C | -1.7784568047 | 0.4830281122  | -0.6424021444 |
| C | -0.8248646715 | 0.7293369406  | -2.619814078  |
| C | -2.1362996673 | 1.0890750126  | -2.745265878  |

|   |               |               |               |
|---|---------------|---------------|---------------|
| H | 2.3414650571  | 3.4430337713  | -1.5434613324 |
| H | 2.3350587925  | 1.8239361527  | -2.2575925171 |
| H | 0.8434935298  | 2.7766192371  | -2.186589163  |
| H | 0.3711173302  | 1.8694173885  | 3.9972201777  |
| H | -1.0463488684 | 3.5090528946  | -0.5164857059 |
| H | -2.4523296622 | 3.9562117062  | 1.4852068818  |
| H | -1.7765771154 | 3.1235747266  | 3.7102265449  |
| H | -1.6523933873 | -3.8685889181 | 2.6537579438  |
| H | -2.577378492  | -3.7861757301 | 1.1207304495  |
| H | -0.8324741232 | -3.5081980435 | 1.1140042843  |
| H | -0.0275990258 | 0.6981715695  | -3.3389514283 |
| H | -2.6921589902 | 1.4384347582  | -3.5974198199 |
| H | -1.7598619545 | 0.5274675974  | 1.5235972741  |
| H | -3.7610713539 | 1.7026357719  | 1.1373555725  |
| H | -4.4938777213 | 0.0958747799  | 1.0482130681  |
| H | -4.4758933883 | 1.9891879566  | -1.1018962065 |
| H | -4.6787037114 | 0.2420375379  | -1.3598624043 |
| C | 2.0861067683  | -1.7575369434 | -1.5090005273 |
| C | 1.3006615872  | -2.8963459826 | -1.6665747684 |
| C | 3.453184354   | -1.8425027436 | -1.2837964084 |
| C | 1.9057181781  | -4.1501077309 | -1.5986923222 |
| C | 4.0508137946  | -3.1023528081 | -1.2278332158 |
| C | 3.281278006   | -4.2558075342 | -1.3830974075 |
| H | 0.2353346209  | -2.7960533858 | -1.8359803336 |
| H | 4.0153311203  | -0.9303942475 | -1.1314376738 |
| H | 1.3026903853  | -5.0430583088 | -1.7178961048 |
| H | 5.1178015421  | -3.1800490797 | -1.0526611926 |
| H | 3.7490388621  | -5.2322934479 | -1.3332038669 |
| H | 3.7490388621  | -5.2322934479 | -1.3332038669 |

TS 6-311++G(d,p) 0020

E(RB3LYP) = -1489.11988840 A.U.

First frequency = -219.9317  $\text{cm}^{-1}$

|   |               |               |               |
|---|---------------|---------------|---------------|
| O | -1.2391633387 | 1.3921067088  | 2.6747891837  |
| O | -0.3617675221 | 2.8756446559  | 1.1927329726  |
| O | 1.4900507534  | -0.6885782238 | -0.2641488589 |
| O | -0.313186841  | -1.3168391423 | 1.0353065334  |

|   |               |               |               |
|---|---------------|---------------|---------------|
| O | -2.3633181367 | -2.0242075078 | -1.4287060154 |
| O | -3.1176781489 | -1.4212286084 | 0.6091905921  |
| N | -0.5404186899 | 0.3468322955  | -0.5616249251 |
| N | -2.2532730481 | 1.2890824248  | -1.4818843495 |
| C | 1.6160472624  | 0.1387353682  | 2.7526292374  |
| C | -0.2690778048 | 1.7110060299  | 2.0059752499  |
| C | 1.0050035565  | 1.0880117932  | 1.7651202569  |
| C | 0.8660485376  | 3.0602135858  | 0.5957367265  |
| C | 1.2076145054  | 4.107780028   | -0.2365164546 |
| C | 1.746664021   | 2.0208868217  | 0.9407469989  |
| C | 3.0423317452  | 2.0417959593  | 0.4199456716  |
| C | 3.4112724734  | 3.0881167821  | -0.431586093  |
| C | 2.5086636357  | 4.107011953   | -0.7590066254 |
| C | 0.2583470207  | -0.494340705  | 0.3461069271  |
| C | -2.6703836965 | -3.7058371777 | 0.2783697873  |
| C | -2.6991769446 | -2.3259146829 | -0.3042226375 |
| C | -3.0465129082 | -0.0238621248 | 0.2988784128  |
| C | -4.2455793462 | 0.4601886336  | -0.5658669525 |
| C | -3.6993109194 | 1.5561026191  | -1.5089468123 |
| C | -1.8791658965 | 0.4462032741  | -0.5241308468 |
| C | -0.0717595414 | 1.1439748169  | -1.6033988402 |
| C | -1.1519310412 | 1.7433233321  | -2.1766724764 |
| H | 2.051022251   | 0.6716169346  | 3.6058662249  |
| H | 0.8626081396  | -0.5553902968 | 3.1281407015  |
| H | 2.4107261241  | -0.4467162783 | 2.2839211411  |
| H | 0.4951331811  | 4.8868762183  | -0.478979593  |
| H | 3.7472828135  | 1.2569743871  | 0.6667108763  |
| H | 4.4137805747  | 3.1125961983  | -0.8443088284 |
| H | 2.8171961166  | 4.9084602252  | -1.4203299385 |
| H | -2.6256570851 | -4.4429986467 | -0.5205774591 |
| H | -1.7688962629 | -3.7802462331 | 0.8929396046  |
| H | -3.5342200371 | -3.8799297014 | 0.9199063691  |
| H | 0.9774708804  | 1.206566297   | -1.824200524  |
| H | -1.2223451153 | 2.4413385828  | -2.9916674521 |
| H | -3.0057380614 | 0.4589824039  | 1.2742829586  |
| H | -5.059647712  | 0.8262180611  | 0.0557628453  |
| H | -4.60486883   | -0.3866352154 | -1.1495545397 |
| H | -3.8765990362 | 2.5638458962  | -1.1323974283 |

|   |               |               |               |
|---|---------------|---------------|---------------|
| H | -4.0745408124 | 1.4786577993  | -2.5277376188 |
| C | 1.974273109   | -1.9915041675 | -0.3610852785 |
| C | 1.1888823838  | -3.0203275463 | -0.8786670542 |
| C | 3.2984528885  | -2.2058948236 | 0.0033202722  |
| C | 1.7476991155  | -4.2892961343 | -1.0166415864 |
| C | 3.8495859471  | -3.4781619586 | -0.1498588713 |
| C | 3.0756751231  | -4.5234234029 | -0.6538755357 |
| H | 0.1629244057  | -2.8288688841 | -1.1663419414 |
| H | 3.881448846   | -1.38234911   | 0.3959844976  |
| H | 1.1424835151  | -5.0956586798 | -1.41507794   |
| H | 4.8825118391  | -3.6499606922 | 0.1302085593  |
| H | 3.5037222876  | -5.5126630947 | -0.7660800661 |
| H | 3.5037222876  | -5.5126630947 | -0.7660800661 |

TS 6-311++G(d,p) 0026

E(RB3LYP) = -1489.11999329 A.U.

First frequency = -203.3763 cm<sup>-1</sup>

|   |               |               |               |
|---|---------------|---------------|---------------|
| O | 3.5547584106  | 0.6838697796  | 0.9045526985  |
| O | 1.8349588676  | 1.2244700092  | 2.2850466059  |
| O | 1.5611601407  | -0.5853847019 | -1.3557435118 |
| O | 0.401415195   | -0.7799596154 | 0.6353567638  |
| O | -2.3790228585 | -2.0832253316 | -0.718045478  |
| O | -2.315000016  | -1.0518255042 | 1.2866246778  |
| N | -0.5345837184 | 0.3660567412  | -1.1359923579 |
| N | -2.5459909508 | 1.0753383241  | -1.5001429752 |
| C | 2.0884637831  | 2.348196726   | -1.2332231745 |
| C | 2.45683912    | 1.1912786822  | 1.0178773488  |
| C | 1.5484993976  | 1.7706501392  | 0.0455578354  |
| C | 0.6693612673  | 1.9459006126  | 2.1576053412  |
| C | -0.2067977007 | 2.2538528194  | 3.1781143183  |
| C | 0.4922702461  | 2.3782784938  | 0.8319015048  |
| C | -0.6075004595 | 3.1806365388  | 0.5238426793  |
| C | -1.5052167799 | 3.5179637821  | 1.5453760163  |
| C | -1.3156016632 | 3.0526522965  | 2.849909672   |
| C | 0.6346627168  | -0.1745081617 | -0.3993183118 |
| C | -1.814631668  | -3.3492778195 | 1.2603909856  |
| C | -2.2083645687 | -2.1323806487 | 0.4805655783  |



|   |               |               |               |
|---|---------------|---------------|---------------|
| C | -2.4659883568 | 0.2496543979  | 0.7029966429  |
| C | -3.9409718972 | 0.5632729019  | 0.3149201596  |
| C | -3.9017907227 | 1.3594078429  | -1.0106169264 |
| C | -1.7522664605 | 0.5092543251  | -0.5927337099 |
| C | -0.5821349039 | 0.8452719192  | -2.4410024777 |
| C | -1.8462474259 | 1.3024987107  | -2.6657681305 |
| H | 2.6749980552  | 1.6068951309  | -1.7773136771 |
| H | 1.2795940821  | 2.6926054296  | -1.8809721871 |
| H | 2.7327993709  | 3.2122171219  | -1.0335918259 |
| H | -0.0404134262 | 1.899220149   | 4.1877589107  |
| H | -0.7621482355 | 3.5409864108  | -0.4873299317 |
| H | -2.3628947206 | 4.1415694931  | 1.3197809903  |
| H | -2.0261036451 | 3.3166528528  | 3.6244362855  |
| H | -0.7363522348 | -3.2850824415 | 1.4317653679  |
| H | -2.3127795435 | -3.3753863221 | 2.2294843021  |
| H | -2.0365116986 | -4.2456017448 | 0.684900502   |
| H | 0.2777498372  | 0.795008855   | -3.0822431367 |
| H | -2.2919541103 | 1.7484907035  | -3.5372876425 |
| H | -2.0917157099 | 0.9221587888  | 1.4725679704  |
| H | -4.4453626917 | 1.1165121486  | 1.1042700412  |
| H | -4.4600694683 | -0.3826876109 | 0.1665024494  |
| H | -4.0017029748 | 2.4346263243  | -0.857906054  |
| H | -4.6399085678 | 1.0269091638  | -1.7384012883 |
| C | 2.0430847166  | -1.8911437189 | -1.2318011313 |
| C | 1.1829249341  | -2.9715722007 | -1.4122576822 |
| C | 3.3966604189  | -2.0716571415 | -0.9815016004 |
| C | 1.7009911988  | -4.2637627999 | -1.3465234461 |
| C | 3.9067075516  | -3.3695876876 | -0.9297848123 |
| C | 3.06263109    | -4.4658828998 | -1.1109554051 |
| H | 0.128082126   | -2.7976930459 | -1.58919368   |
| H | 4.0168001157  | -1.2017595672 | -0.8068613764 |
| H | 1.0397930373  | -5.1122243516 | -1.4819131353 |
| H | 4.9625260356  | -3.5219384899 | -0.7366929484 |
| H | 3.4615568245  | -5.4726264997 | -1.0637521442 |
| H | 3.4615568245  | -5.4726264997 | -1.0637521442 |

TS 6-311++G(d,p) 0027  
E(RB3LYP) = -1489.11826628 A.U.

First frequency =  $-188.6931 \text{ cm}^{-1}$

|   |               |               |               |
|---|---------------|---------------|---------------|
| O | 1.0897205374  | 0.4581624391  | -2.7237112619 |
| O | 2.6067031827  | 1.4764661753  | -1.3788803325 |
| O | 0.1197219202  | -0.9833839995 | -0.2707122874 |
| O | 1.5025352055  | 0.1294505121  | 1.2172703956  |
| O | -2.0684146911 | -3.0594314377 | -1.3679276818 |
| O | -2.6010475196 | -0.8779139789 | -1.083123932  |
| N | -0.798451524  | 0.4103593707  | 1.3213937504  |
| N | -2.837215147  | 0.5502404074  | 2.0367796917  |
| C | -1.0458547267 | 2.0401119328  | -1.1752236543 |
| C | 1.2843542145  | 1.1611284436  | -1.7511272222 |
| C | 0.3795303236  | 1.7611671134  | -0.7867459494 |
| C | 2.5377654317  | 2.4265957654  | -0.3800262635 |
| C | 3.617335078   | 3.0677687666  | 0.1940094786  |
| C | 1.2043329569  | 2.7047684209  | -0.0464023389 |
| C | 0.9392692442  | 3.700903494   | 0.8922327286  |
| C | 2.0146389859  | 4.3694402686  | 1.4888376033  |
| C | 3.3343808035  | 4.0513817773  | 1.1525043809  |
| C | 0.4620554828  | 0.0746652776  | 0.579833553   |
| C | -1.7433890954 | -1.4914941841 | -3.1816750714 |
| C | -2.141715846  | -1.9395183993 | -1.8106687751 |
| C | -2.7940301375 | -1.0544503278 | 0.3193347485  |
| C | -4.2653292126 | -0.7526491657 | 0.7129975937  |
| C | -4.2168421206 | 0.0348529176  | 2.0412111692  |
| C | -2.0508578478 | -0.0301006004 | 1.1269435868  |
| C | -0.8103166792 | 1.2976987838  | 2.3874273358  |
| C | -2.0927991344 | 1.3811758474  | 2.845146365   |
| H | -1.5264125477 | 1.1507452304  | -1.5790226093 |
| H | -1.6268943512 | 2.381530046   | -0.3142301468 |
| H | -1.0984398596 | 2.8300489922  | -1.9331287549 |
| H | 4.6334443745  | 2.8234618061  | -0.0903746163 |
| H | -0.081159962  | 3.956066699   | 1.1544991004  |
| H | 1.8226358635  | 5.147440539   | 2.2192167587  |
| H | 4.1528328025  | 4.5791154039  | 1.6285452305  |
| H | -0.8365067089 | -0.885743115  | -3.0860037797 |
| H | -1.5507021105 | -2.3570624119 | -3.8117038069 |
| H | -2.5211397613 | -0.8637366474 | -3.6198512702 |

|   |               |               |               |
|---|---------------|---------------|---------------|
| H | 0.0972675959  | 1.7744664756  | 2.7091021457  |
| H | -2.520611402  | 1.9456186256  | 3.6547562604  |
| H | -2.4775981594 | -2.0592501921 | 0.6025221821  |
| H | -4.8545645516 | -1.6631384539 | 0.7981517359  |
| H | -4.6937839916 | -0.1315645676 | -0.07436999   |
| H | -4.3476145139 | -0.6039557192 | 2.9150761248  |
| H | -4.9267043941 | 0.8586368775  | 2.0858117572  |
| C | 0.9385175997  | -2.1152582719 | -0.2498703065 |
| C | 0.9845694496  | -2.923613648  | 0.8827128316  |
| C | 1.6254687598  | -2.4518479615 | -1.4084952138 |
| C | 1.7376806318  | -4.0953470109 | 0.8487329342  |
| C | 2.3690140374  | -3.6324503987 | -1.4355878443 |
| C | 2.4295376799  | -4.4540595189 | -0.3100760252 |
| H | 0.4357053742  | -2.6377204956 | 1.7714603455  |
| H | 1.5707734683  | -1.7873389996 | -2.260572623  |
| H | 1.779210514   | -4.7304834977 | 1.7263612703  |
| H | 2.9054498769  | -3.9050567059 | -2.337418686  |
| H | 3.011179667   | -5.3684013059 | -0.3338200996 |
| H | 3.011179667   | -5.3684013059 | -0.3338200996 |

TS 6-311++G(d,p) 0028

E(RB3LYP) = -1489.11723524 A.U.

First frequency = -205.6093  $\text{cm}^{-1}$

|   |               |               |               |
|---|---------------|---------------|---------------|
| O | 1.2890522074  | 0.4223694618  | -2.5614326867 |
| O | 2.7333028492  | 1.4027320592  | -1.1128044102 |
| O | 0.1235920727  | -1.0303198208 | -0.1819602838 |
| O | 1.3382681605  | 0.1056533091  | 1.4344838941  |
| O | -2.3446750381 | -2.969622941  | -1.7503757565 |
| O | -2.4847012254 | -0.7471166437 | -1.3673593134 |
| N | -0.9575261456 | 0.3926283211  | 1.2662110475  |
| N | -3.0611158595 | 0.6006169395  | 1.7381792832  |
| C | -0.8953294511 | 2.0902120521  | -1.1774802587 |
| C | 1.4303795956  | 1.1184968049  | -1.5786673043 |
| C | 0.4732415788  | 1.7274428456  | -0.6656137147 |
| C | 2.6166026305  | 2.3441975531  | -0.1080096706 |
| C | 3.6692324359  | 2.9550134489  | 0.5436413348  |
| C | 1.2713554555  | 2.6447861699  | 0.1411106554  |

|   |               |               |               |
|---|---------------|---------------|---------------|
| C | 0.9640369628  | 3.6311606825  | 1.0756478644  |
| C | 2.0106570253  | 4.2701028854  | 1.7512216363  |
| C | 3.3429396666  | 3.9308749077  | 1.4962594242  |
| C | 0.3857687434  | 0.0567055866  | 0.6690231416  |
| C | -1.5380185144 | -1.4039367715 | -3.4119269316 |
| C | -2.158067845  | -1.8351977026 | -2.1201858778 |
| C | -2.8767117173 | -0.9550161351 | -0.0112435873 |
| C | -4.3704628101 | -0.5887487614 | 0.2040218331  |
| C | -4.4521630724 | 0.1543767671  | 1.5556173442  |
| C | -2.193019438  | 0.007176773   | 0.9144086972  |
| C | -1.0652040146 | 1.259518539   | 2.3434826074  |
| C | -2.3889710912 | 1.384678302   | 2.6488685128  |
| H | -1.541694984  | 2.4297552294  | -0.3637811895 |
| H | -0.8330761534 | 2.9101699888  | -1.9017981697 |
| H | -1.3730326627 | 1.2427249679  | -1.6641552991 |
| H | 4.6967752536  | 2.6943266904  | 0.3218765937  |
| H | -0.0663585418 | 3.9020570631  | 1.2757203606  |
| H | 1.7860905933  | 5.0407246206  | 2.4800568809  |
| H | 4.1385254045  | 4.4355288574  | 2.0322774703  |
| H | -0.576918947  | -0.9308565651 | -3.187427708  |
| H | -1.3960043132 | -2.2662218592 | -4.0593916391 |
| H | -2.1667372477 | -0.658198853  | -3.9022691794 |
| H | -0.1857891017 | 1.6949389763  | 2.7814365689  |
| H | -2.8893713411 | 1.9489173043  | 3.4158869175  |
| H | -2.6534952372 | -1.9825720029 | 0.2768889256  |
| H | -5.0089846256 | -1.4692786895 | 0.1803847192  |
| H | -4.6637568223 | 0.0781370017  | -0.6075605471 |
| H | -4.7196098699 | -0.5037013073 | 2.3828606118  |
| H | -5.1237723868 | 1.0105973657  | 1.5428382085  |
| C | 1.0246403723  | -2.0929531338 | -0.2152950205 |
| C | 0.4708737064  | -3.3682385414 | -0.1325855289 |
| C | 2.3968384966  | -1.9187020141 | -0.3879292983 |
| C | 1.2990663683  | -4.4859071761 | -0.2274217927 |
| C | 3.2152955492  | -3.0444893654 | -0.4697095416 |
| C | 2.6748965209  | -4.3288767893 | -0.3925591855 |
| H | -0.5988930006 | -3.475454529  | -0.0151609854 |
| H | 2.8161575753  | -0.9265815342 | -0.4525691707 |
| H | 0.864857608   | -5.4776431249 | -0.1691158909 |

|   |              |               |               |
|---|--------------|---------------|---------------|
| H | 4.2833746715 | -2.911936805  | -0.6013355184 |
| H | 3.3195573998 | -5.1974027982 | -0.4628078046 |
| H | 3.3195573998 | -5.1974027982 | -0.4628078046 |

TS 6-311++G(d,p) 0030

E(RB3LYP) = -1489.12098490 A.U.

First frequency = -247.4722 cm<sup>-1</sup>

|   |               |               |               |
|---|---------------|---------------|---------------|
| O | -0.8182806676 | 1.4349857396  | 2.6453577491  |
| O | -0.1927143847 | 2.8395251545  | 0.9793266075  |
| O | 1.166327674   | -0.8367696806 | -0.7527385452 |
| O | -0.2418018283 | -1.3621093461 | 1.029257874   |
| O | -3.8491812441 | -1.4804629622 | -1.385756208  |
| O | -3.2703659488 | -1.589649165  | 0.7912439118  |
| N | -0.813100568  | 0.2343915046  | -0.5541269588 |
| N | -2.6817125253 | 1.2383426485  | -0.9827612825 |
| C | 1.9770761928  | 0.1476040548  | 2.2859817182  |
| C | 0.0050143051  | 1.6938632655  | 1.787774154   |
| C | 1.1843958434  | 0.9887667823  | 1.3194321624  |
| C | 0.9083214394  | 2.9594350594  | 0.1558609075  |
| C | 1.1278573166  | 3.9832116756  | -0.7448055923 |
| C | 1.7958661662  | 1.8911248103  | 0.3516239944  |
| C | 2.9762419228  | 1.8578407008  | -0.3907439397 |
| C | 3.2230646011  | 2.8791822276  | -1.3134917401 |
| C | 2.311243698   | 3.9258574643  | -1.4932461177 |
| C | 0.1886266088  | -0.5685004493 | 0.205903773   |
| C | -3.8252603717 | -3.6185486569 | -0.254588429  |
| C | -3.6677474309 | -2.1305692041 | -0.3799009281 |
| C | -3.0079586198 | -0.1680252089 | 0.8836756829  |
| C | -4.2581119889 | 0.7349660769  | 0.677202437   |
| C | -4.1119233232 | 1.4247707037  | -0.7011386128 |
| C | -2.0897579609 | 0.3687987401  | -0.1678886794 |
| C | -0.6121746695 | 1.0361195677  | -1.6715722426 |
| C | -1.7939261038 | 1.6640355364  | -1.9431067377 |
| H | 2.8032276307  | -0.3529950519 | 1.7784433814  |
| H | 2.3977203027  | 0.7628220144  | 3.0890839799  |
| H | 1.3428379248  | -0.6180926787 | 2.7348215436  |
| H | 0.4126127918  | 4.7874033058  | -0.8661767894 |

|   |               |               |               |
|---|---------------|---------------|---------------|
| H | 3.6862521038  | 1.0506959304  | -0.2588747798 |
| H | 4.1358443961  | 2.8615218534  | -1.8984690683 |
| H | 2.5223397955  | 4.7064446916  | -2.2149764426 |
| H | -2.8423854104 | -4.0659501192 | -0.0866194268 |
| H | -4.4506477463 | -3.861273311  | 0.6060333407  |
| H | -4.2613281942 | -4.0191881055 | -1.1669256153 |
| H | 0.3482367095  | 1.0951422217  | -2.148301229  |
| H | -2.0552011768 | 2.3716722859  | -2.7097699858 |
| H | -2.5712243012 | -0.0608360216 | 1.8706667508  |
| H | -4.2721653901 | 1.4839133268  | 1.4687046432  |
| H | -5.1723148132 | 0.1485287566  | 0.7454459084  |
| H | -4.3477137629 | 2.4871326155  | -0.6742157995 |
| H | -4.6863777832 | 0.9314033053  | -1.4832784112 |
| C | 2.1964584947  | -1.7445597264 | -0.5731748658 |
| C | 3.2952900491  | -1.5332703433 | -1.4089730612 |
| C | 2.1709648435  | -2.827948134  | 0.3074139302  |
| C | 4.3812319438  | -2.4017440643 | -1.358675955  |
| C | 3.2725939232  | -3.6839179473 | 0.3514287075  |
| C | 4.3783029716  | -3.4806909095 | -0.4728181693 |
| H | 3.2826297289  | -0.6863116285 | -2.0834210095 |
| H | 1.3183928375  | -2.9870448685 | 0.9476040644  |
| H | 5.2312524705  | -2.2307134177 | -2.0094265561 |
| H | 3.256828923   | -4.5216042041 | 1.0397526926  |
| H | 5.2257445872  | -4.1546098474 | -0.428094535  |
| H | 5.2257445872  | -4.1546098474 | -0.428094535  |

TS 6-311++G(d,p) 0036

E(RB3LYP) = -1489.12094498 A.U.

First frequency = -208.9059  $\text{cm}^{-1}$

|   |               |               |               |
|---|---------------|---------------|---------------|
| O | 3.5315836816  | 0.4596315515  | 1.830239935   |
| O | 1.599475388   | 1.3182697145  | 2.6530659316  |
| O | 2.0022330112  | -0.9241017685 | -0.6966242064 |
| O | 0.3220576744  | -0.6925678903 | 0.8806869101  |
| O | -2.8682994846 | -1.4654708823 | -1.6308676765 |
| O | -2.6096758252 | -0.6906921934 | 0.4699123904  |
| N | 0.086536118   | 0.2667866891  | -1.2056795717 |
| N | -1.6170603494 | 1.1705333748  | -2.1923972436 |

|   |               |               |               |
|---|---------------|---------------|---------------|
| C | 2.8489832016  | 1.9524389136  | -0.7743224893 |
| C | 2.5060130799  | 1.0703534645  | 1.6012729293  |
| C | 1.9437011815  | 1.6025923415  | 0.3736775851  |
| C | 0.6007816898  | 2.126606376   | 2.1587714161  |
| C | -0.4559461168 | 2.6394421243  | 2.8826125052  |
| C | 0.8125916263  | 2.4056204905  | 0.7975120111  |
| C | -0.0666871393 | 3.2678990248  | 0.1408290312  |
| C | -1.1384981198 | 3.8148755241  | 0.8581646926  |
| C | -1.3397399826 | 3.4954341985  | 2.2035540419  |
| C | 0.9197075782  | -0.2796560728 | -0.100063634  |
| C | -3.1093171487 | -2.9757738028 | 0.2422106538  |
| C | -2.8672311455 | -1.6583342234 | -0.4344139863 |
| C | -2.2382528593 | 0.6324066192  | 0.0197987533  |
| C | -3.3879647362 | 1.4194506358  | -0.6722343595 |
| C | -3.0421507918 | 1.526034822   | -2.177860835  |
| C | -1.1835217791 | 0.6621731489  | -1.0405163717 |
| C | 0.4528955691  | 0.5305012552  | -2.5205461667 |
| C | -0.6228623105 | 1.0968886737  | -3.141182566  |
| H | 3.4592637285  | 1.0952651507  | -1.0617797475 |
| H | 2.2738725756  | 2.2746867664  | -1.6449092351 |
| H | 3.5222434298  | 2.7755373216  | -0.508474991  |
| H | -0.5908580622 | 2.3962766465  | 3.9292610238  |
| H | 0.0803291339  | 3.5166836464  | -0.9044515713 |
| H | -1.8246984004 | 4.4913076427  | 0.3612233907  |
| H | -2.1820492992 | 3.9193225     | 2.7376106994  |
| H | -3.7665007599 | -2.8527482663 | 1.103626507   |
| H | -3.5343531235 | -3.6809602653 | -0.46876817   |
| H | -2.1507847272 | -3.356832764  | 0.6053713147  |
| H | 1.4322114906  | 0.2824487285  | -2.8848967587 |
| H | -0.7522580119 | 1.4409259348  | -4.1522288621 |
| H | -1.8998100246 | 1.1147401244  | 0.9318329013  |
| H | -3.4384573715 | 2.4117919345  | -0.2266738913 |
| H | -4.3414167313 | 0.9207929365  | -0.5096417412 |
| H | -3.1789995124 | 2.5295828281  | -2.5773686874 |
| H | -3.5836448466 | 0.8036666191  | -2.7870341662 |
| C | 2.2015634433  | -2.2615719376 | -0.3328280956 |
| C | 1.4406801833  | -3.2506955126 | -0.9494403252 |
| C | 3.1886960138  | -2.5732447022 | 0.5923763699  |

|   |              |               |               |
|---|--------------|---------------|---------------|
| C | 1.6805477767 | -4.5867978639 | -0.6312562193 |
| C | 3.425322934  | -3.913949614  | 0.8990880756  |
| C | 2.6742164413 | -4.9206155151 | 0.2908808501  |
| H | 0.6762367484 | -2.9714714178 | -1.6648340699 |
| H | 3.7378223378 | -1.7673482583 | 1.0625403063  |
| H | 1.0936859132 | -5.3648183343 | -1.1061269246 |
| H | 4.1942545639 | -4.1696698738 | 1.6192497309  |
| H | 2.860427683  | -5.9601854938 | 0.5348649138  |
| H | 2.860427683  | -5.9601854938 | 0.5348649138  |

TS 6-311++G(d,p) 0040  
E(RB3LYP) = -1489.12159424 A.U.  
First frequency = -203.9497 cm<sup>-1</sup>

|   |               |               |               |
|---|---------------|---------------|---------------|
| O | 3.3555493604  | 0.2727741012  | 1.8375638534  |
| O | 1.3520454707  | 1.0096350748  | 2.6092434622  |
| O | 2.0100401472  | -0.8752533258 | -0.8754803706 |
| O | 0.1965458766  | -0.7713620525 | 0.560441373   |
| O | -2.9428297524 | -0.8275887739 | 1.8221977806  |
| O | -2.609256008  | -0.8090580945 | -0.4151542488 |
| N | 0.1520798495  | 0.3747511706  | -1.4420699727 |
| N | -1.4862680056 | 1.3347611116  | -2.487958907  |
| C | 2.8219416893  | 2.0255584225  | -0.6382978122 |
| C | 2.3369403406  | 0.8949986749  | 1.6060211643  |
| C | 1.8536709424  | 1.5587259471  | 0.4110312504  |
| C | 0.3752928854  | 1.8575387719  | 2.1374745209  |
| C | -0.7412805628 | 2.2710437186  | 2.8332753684  |
| C | 0.6809307029  | 2.2950289571  | 0.8365573165  |
| C | -0.1649915159 | 3.2176157314  | 0.2185644826  |
| C | -1.2963305529 | 3.6664357302  | 0.9127056298  |
| C | -1.5891102865 | 3.1905253817  | 2.1930805691  |
| C | 0.8791023082  | -0.2813862158 | -0.3250194655 |
| C | -2.8508894832 | -2.91405312   | 0.6046541074  |
| C | -2.818092109  | -1.4243023144 | 0.780841651   |
| C | -2.2616184037 | 0.5928704375  | -0.3929574504 |
| C | -3.3498744478 | 1.4719837292  | -1.0600724456 |
| C | -2.9110516212 | 1.7075811228  | -2.5293503589 |
| C | -1.1256802826 | 0.7625517271  | -1.3405644086 |



|   |               |               |               |
|---|---------------|---------------|---------------|
| C | 0.6115796372  | 0.7320716051  | -2.7048058129 |
| C | -0.421445367  | 1.3350017717  | -3.3638581785 |
| H | 2.2961950737  | 2.4303225028  | -1.5059277983 |
| H | 3.4704039174  | 2.8208080374  | -0.2527936958 |
| H | 3.4575954284  | 1.2040655651  | -0.9722121047 |
| H | -0.95041228   | 1.9030069238  | 3.8299379064  |
| H | 0.0552502562  | 3.5902704324  | -0.7758120902 |
| H | -1.9567243858 | 4.3896309716  | 0.4475096011  |
| H | -2.4774711906 | 3.5384997778  | 2.7069438404  |
| H | -1.8209630713 | -3.2564642612 | 0.4685989942  |
| H | -3.274849287  | -3.3830488847 | 1.4899692189  |
| H | -3.4171447285 | -3.1883808719 | -0.2861019855 |
| H | 1.6172335251  | 0.5147441273  | -3.0133397824 |
| H | -0.4782898781 | 1.7488146834  | -4.3551833547 |
| H | -2.0296635897 | 0.8963835661  | 0.6238022575  |
| H | -3.400976725  | 2.4212850535  | -0.5291053356 |
| H | -4.3214805595 | 0.9858998275  | -0.9970363045 |
| H | -3.0147765608 | 2.7449037731  | -2.8428321573 |
| H | -3.4232466842 | 1.0615328902  | -3.2423523823 |
| C | 2.2190359266  | -2.2242510196 | -0.5676275413 |
| C | 3.3116465479  | -2.5645520772 | 0.2180093306  |
| C | 1.3722462869  | -3.193601923  | -1.0986091433 |
| C | 3.5695768895  | -3.9131875593 | 0.4673469995  |
| C | 1.6327957066  | -4.5372070372 | -0.8350584802 |
| C | 2.7329861642  | -4.8998977862 | -0.0554060896 |
| H | 3.919582531   | -1.7739605691 | 0.6381809622  |
| H | 0.5248165405  | -2.8947455332 | -1.7037791927 |
| H | 4.420389784   | -4.1899714595 | 1.0794684873  |
| H | 0.978290137   | -5.2996088503 | -1.2419719086 |
| H | 2.9341200454  | -5.9458063219 | 0.1456778583  |
| H | 2.9341200454  | -5.9458063219 | 0.1456778583  |

## 4.2 Minor enantiomer

### 4.2.1 Starting TS

TS input

E(RB3LYP) = -1488.74935124 A.U.

First frequency =  $-208.0832 \text{ cm}^{-1}$

|   |               |               |               |
|---|---------------|---------------|---------------|
| O | -1.4087617543 | -2.7481900184 | 0.6640895067  |
| O | 0.2295635904  | -2.8290224215 | -0.9116082011 |
| O | 1.1100108414  | 0.8604443288  | 1.2334432264  |
| O | 0.2782869624  | 0.1847301131  | -0.8371978995 |
| O | -3.5366003665 | 2.0591315123  | -0.7931050869 |
| O | -2.4822309068 | 0.4585366917  | -1.9995234216 |
| N | -1.0952443765 | 0.2404119022  | 1.0266823018  |
| N | -3.2316413203 | -0.046643262  | 1.2625132711  |
| C | 0.8121330187  | -1.7825275585 | 2.5987937037  |
| C | -0.2407347126 | -2.5132499791 | 0.3760562352  |
| C | 0.8029851751  | -1.809343684  | 1.0954104234  |
| C | 1.5753160019  | -2.5150114918 | -0.9461884805 |
| C | 2.4256257544  | -2.7389252814 | -2.0138679571 |
| C | 1.9962708733  | -1.9695581666 | 0.2779693588  |
| C | 3.340969069   | -1.6393354734 | 0.4451496741  |
| C | 4.2254003988  | -1.859681398  | -0.6190330032 |
| C | 3.7743546331  | -2.3939096511 | -1.8323886241 |
| C | 0.2469571783  | 0.1472432012  | 0.3885744084  |
| C | -2.5443118359 | 2.6116749529  | -2.9343282884 |
| C | -2.9291393655 | 1.7161165445  | -1.7885287984 |
| C | -2.6492069325 | -0.5447518569 | -0.9739794247 |
| C | -4.1227919779 | -0.9630167083 | -0.6997756143 |
| C | -4.5366428318 | -0.3449541735 | 0.6599214846  |
| C | -2.2210998666 | -0.1216911925 | 0.3971631525  |
| C | -1.4209651979 | 0.5619801806  | 2.3397317053  |
| C | -2.7690742873 | 0.3850010209  | 2.4851792126  |
| H | 1.3517886099  | -0.9068791646 | 2.9701368858  |
| H | -0.2085386714 | -1.7548337035 | 2.9882187578  |
| H | 1.3003610758  | -2.6754370601 | 3.0082836057  |
| H | 2.0624496783  | -3.1647293023 | -2.943005985  |
| H | 3.6909226301  | -1.2101874411 | 1.3789032194  |
| H | 5.2751591959  | -1.6064533647 | -0.5038348654 |
| H | 4.4761868822  | -2.5511993898 | -2.6457893464 |
| H | -1.4551845207 | 2.7166516338  | -2.9498409177 |
| H | -2.8464146306 | 2.1641616051  | -3.8843134159 |
| H | -3.0090578724 | 3.5885057303  | -2.8081138559 |

|   |               |               |               |
|---|---------------|---------------|---------------|
| H | -0.6671352494 | 0.8846949564  | 3.0354258104  |
| H | -3.4122451864 | 0.5292253937  | 3.3373850098  |
| H | -2.0449877581 | -1.3708894073 | -1.3369493319 |
| H | -4.1539420833 | -2.0519814562 | -0.6332736106 |
| H | -4.7745115797 | -0.6449428686 | -1.513520327  |
| H | -5.090692241  | -1.037486629  | 1.2942577869  |
| H | -5.088696872  | 0.588841414   | 0.5479706734  |
| C | 1.9503892587  | 1.8293619515  | 0.6939371974  |
| C | 2.761813686   | 1.6025946623  | -0.4199610243 |
| C | 1.9969724634  | 3.0411226706  | 1.3846937706  |
| C | 3.6197889323  | 2.6193805853  | -0.8433306894 |
| C | 2.8694799285  | 4.0432002638  | 0.9572579719  |
| C | 3.6809182335  | 3.8373786864  | -0.1610355391 |
| H | 2.7169814646  | 0.6523704004  | -0.9317227816 |
| H | 1.35217181    | 3.1812392945  | 2.2460963111  |
| H | 4.2515950956  | 2.4499719622  | -1.7104081768 |
| H | 2.9089625754  | 4.9846769701  | 1.4970182882  |
| H | 4.3570463804  | 4.6178724754  | -0.4962482859 |
| H | 4.3570463804  | 4.6178724754  | -0.4962482859 |

#### 4.2.2 Lowest TS

TS 6-311++G(d,p) 0010

E(RB3LYP) = -1489.12202589 A.U.

First frequency = -264.0308  $\text{cm}^{-1}$

|   |               |               |               |
|---|---------------|---------------|---------------|
| O | -1.7512198772 | -1.9419845976 | 1.4530101417  |
| O | -0.3011292497 | -2.602523005  | -0.150808133  |
| O | 0.9550945628  | 1.5292252941  | 0.9938665567  |
| O | 0.0678347022  | 0.3718196733  | -0.8313367879 |
| O | -2.3119168997 | -0.7370151398 | -3.3264619275 |
| O | -2.8287559379 | 0.8734821867  | -1.8264937701 |
| N | -1.2370465741 | 0.9626291849  | 0.9974000542  |
| N | -3.3856257284 | 0.9395854224  | 1.2874420726  |
| C | 0.7181778472  | -0.7759563251 | 2.8895072678  |
| C | -0.6135241914 | -1.8998860962 | 1.0175645608  |
| C | 0.5506094017  | -1.1275264046 | 1.4346431795  |
| C | 1.0601216822  | -2.4719741858 | -0.3624218375 |

|   |               |               |               |
|---|---------------|---------------|---------------|
| C | 1.7739612811  | -3.0981022393 | -1.3655203657 |
| C | 1.6431194397  | -1.6564574157 | 0.6140579426  |
| C | 3.0251556092  | -1.4813453788 | 0.6040227942  |
| C | 3.7766124276  | -2.1084028961 | -0.3940347864 |
| C | 3.1603296665  | -2.8966630718 | -1.3719824747 |
| C | 0.0807328167  | 0.6162470023  | 0.3703794125  |
| C | -2.2717370221 | 1.5852557672  | -3.9975141174 |
| C | -2.4637894801 | 0.4305524334  | -3.0570535772 |
| C | -2.8952830971 | -0.1021736079 | -0.76015259   |
| C | -4.3572416763 | -0.415767804  | -0.3573014771 |
| C | -4.7198822314 | 0.5652260803  | 0.7862827889  |
| C | -2.400841461  | 0.5698513474  | 0.4725100075  |
| C | -1.5069896105 | 1.5992107409  | 2.2037459055  |
| C | -2.8607361095 | 1.5889092885  | 2.383726114   |
| H | 1.1185377081  | -1.6260290472 | 3.4523995983  |
| H | 1.404768429   | 0.0621545551  | 3.0125227381  |
| H | -0.2397850646 | -0.5046052109 | 3.3357617248  |
| H | 1.2816021811  | -3.718535324  | -2.1040408816 |
| H | 3.5085690167  | -0.8536545343 | 1.3422311868  |
| H | 4.8521267449  | -1.9743602541 | -0.4156555604 |
| H | 3.7611899618  | -3.3663632534 | -2.1423079198 |
| H | -2.1982195254 | 1.2193429056  | -5.0193050563 |
| H | -3.0915556373 | 2.2985262685  | -3.9031664293 |
| H | -1.3465173648 | 2.101248954   | -3.7272076762 |
| H | -0.7178613919 | 2.0033364165  | 2.809633968   |
| H | -3.4688676073 | 1.9803964882  | 3.1799941838  |
| H | -2.321542516  | -0.9812279224 | -1.033487317  |
| H | -4.3960951352 | -1.4403995478 | 0.012025393   |
| H | -5.025416186  | -0.3236635204 | -1.211401144  |
| H | -5.2989564271 | 0.0987631929  | 1.5808415189  |
| H | -5.2347708774 | 1.4615466107  | 0.4393905899  |
| C | 2.2561209786  | 1.7200449208  | 0.5600461494  |
| C | 2.6389535666  | 1.735416985   | -0.7823326836 |
| C | 3.1864287252  | 1.9758593425  | 1.5684088326  |
| C | 3.9760527659  | 1.9729867272  | -1.0978685387 |
| C | 4.5160803911  | 2.2219063699  | 1.2370242182  |
| C | 4.9197001952  | 2.2121620432  | -0.0988598073 |
| H | 1.9102597159  | 1.5405154757  | -1.552977093  |

|   |              |              |               |
|---|--------------|--------------|---------------|
| H | 2.8587916628 | 1.9708507444 | 2.6008432414  |
| H | 4.2786397674 | 1.9714086862 | -2.1390922141 |
| H | 5.2360379288 | 2.4146276071 | 2.0243346515  |
| H | 5.9560076602 | 2.3948292541 | -0.3581916356 |
| H | 5.9560076602 | 2.3948292541 | -0.3581916356 |

### 4.2.3 Additional TS

TS 6-31G(d,p) 0001

E(RB3LYP) = -1488.74902322 A.U.

First frequency = -212.5221  $\text{cm}^{-1}$

|   |               |               |               |
|---|---------------|---------------|---------------|
| O | -1.7225238811 | -1.970643596  | 1.5875622405  |
| O | -0.274953695  | -2.7247439051 | 0.0087181566  |
| O | 0.8505425679  | 1.5159199787  | 0.7784453667  |
| O | 0.051330258   | 0.1517185024  | -0.9462197081 |
| O | -2.5724965253 | 2.0051534435  | -1.8658764111 |
| O | -2.4681042014 | -0.2391519489 | -2.1339184306 |
| N | -1.3119916571 | 0.8474251291  | 0.8044688264  |
| N | -3.45728613   | 0.8040864223  | 1.1009182506  |
| C | 0.725510885   | -0.6202387388 | 2.8801470394  |
| C | -0.5861976593 | -1.9430127093 | 1.131898769   |
| C | 0.5651634285  | -1.1182191671 | 1.4683432897  |
| C | 1.0786912885  | -2.5760661023 | -0.2331876383 |
| C | 1.7941909811  | -3.2558629749 | -1.2030109993 |
| C | 1.6595509179  | -1.6783884988 | 0.6760586373  |
| C | 3.0372353911  | -1.4648966515 | 0.621303175   |
| C | 3.7876205516  | -2.1421858264 | -0.3469599034 |
| C | 3.1755921433  | -3.0181720601 | -1.2525794662 |
| C | 0.0234502222  | 0.5172133308  | 0.2285649091  |
| C | -1.4666227939 | 1.0698709858  | -3.8100307509 |
| C | -2.2290503844 | 1.0394316313  | -2.5177752054 |
| C | -2.9839365664 | -0.4650309974 | -0.8221790912 |
| C | -4.5163016673 | -0.2129368244 | -0.719591721  |
| C | -4.7782994285 | 0.2875932362  | 0.7186539924  |
| C | -2.4713635625 | 0.4078877638  | 0.2946209575  |
| C | -1.5924141662 | 1.5496868291  | 1.9735329556  |
| C | -2.9425780172 | 1.5133012939  | 2.1654253875  |

|   |               |               |               |
|---|---------------|---------------|---------------|
| H | -0.2505079887 | -0.3869841887 | 3.3128677033  |
| H | 1.1992985711  | -1.3778820494 | 3.5161953693  |
| H | 1.343103973   | 0.2797508608  | 2.9157839371  |
| H | 1.3042600255  | -3.9429378239 | -1.8845213478 |
| H | 3.515144629   | -0.768577594  | 1.3020283078  |
| H | 4.8598617781  | -1.9787261511 | -0.401678681  |
| H | 3.7759810219  | -3.5274891425 | -2.0004092023 |
| H | -0.43313565   | 0.7916391096  | -3.5813374437 |
| H | -1.8657035069 | 0.3400695456  | -4.5174967388 |
| H | -1.4938897973 | 2.0733108838  | -4.2331218672 |
| H | -0.8082191074 | 2.0213942459  | 2.5377429559  |
| H | -3.5607013191 | 1.9352138136  | 2.9402982266  |
| H | -2.7198964078 | -1.4994755133 | -0.6000472309 |
| H | -5.0874962189 | -1.1113438947 | -0.9518069883 |
| H | -4.7762332113 | 0.5676081307  | -1.4359822048 |
| H | -5.0508692719 | -0.519771436  | 1.4026800665  |
| H | -5.5265639748 | 1.078673722   | 0.7766865151  |
| C | 2.1468736284  | 1.7091294681  | 0.3320363448  |
| C | 3.0750449402  | 2.0515729415  | 1.3195546424  |
| C | 2.5244778452  | 1.6526047549  | -1.0134560748 |
| C | 4.3995269102  | 2.3059932719  | 0.9658822726  |
| C | 3.8565433662  | 1.8985951561  | -1.3497219495 |
| C | 4.7993203666  | 2.2195833791  | -0.3702332016 |
| H | 2.747998577   | 2.1107020138  | 2.352149685   |
| H | 1.7922765391  | 1.3977203856  | -1.7650735288 |
| H | 5.1183251669  | 2.5666652655  | 1.7369658193  |
| H | 4.1556554772  | 1.841418215   | -2.3922878077 |
| H | 5.8321483761  | 2.4088068031  | -0.6456777469 |
| H | 5.8321483761  | 2.4088068031  | -0.6456777469 |

TS 6-31G(d,p) 0010

E(RB3LYP) = -1488.75073277 A.U.

First frequency = -219.6892 cm<sup>-1</sup>

|   |               |               |               |
|---|---------------|---------------|---------------|
| O | -1.7921085284 | -1.9092919975 | 1.4546641296  |
| O | -0.3689892438 | -2.5423925756 | -0.1978032615 |
| O | 0.9235674989  | 1.5499174635  | 0.9970930956  |
| O | 0.0196276502  | 0.4181049042  | -0.8422976611 |

|   |               |               |               |
|---|---------------|---------------|---------------|
| O | -2.0234365413 | -0.8540197017 | -3.1634387835 |
| O | -2.8407320461 | 0.7776286408  | -1.8108674163 |
| N | -1.2648780471 | 0.9820893296  | 1.007359231   |
| N | -3.4119066312 | 0.9438496527  | 1.3175851333  |
| C | 0.6977746049  | -0.7719938443 | 2.8717011551  |
| C | -0.6541151606 | -1.8733161628 | 1.0022058707  |
| C | 0.52295443    | -1.1266786842 | 1.4195426369  |
| C | 0.9881006376  | -2.4112077357 | -0.4292166101 |
| C | 1.6802736671  | -3.0075493121 | -1.4682730554 |
| C | 1.5983520427  | -1.6356422139 | 0.5689369469  |
| C | 2.9831850518  | -1.4678217626 | 0.5353562346  |
| C | 3.7104481165  | -2.064617519  | -0.500682272  |
| C | 3.0691643403  | -2.8152526166 | -1.4944845867 |
| C | 0.0418464371  | 0.6566482281  | 0.3652558967  |
| C | -1.944885595  | 1.4594900144  | -3.8764122488 |
| C | -2.2578939206 | 0.3150935932  | -2.9531845622 |
| C | -2.9237969459 | -0.1509818085 | -0.7108775377 |
| C | -4.3882139504 | -0.444197022  | -0.2977304478 |
| C | -4.7466960862 | 0.5608095479  | 0.8281662688  |
| C | -2.4288454502 | 0.5579186292  | 0.5040425293  |
| C | -1.5299397934 | 1.6430657929  | 2.2023457989  |
| C | -2.884049433  | 1.6234855036  | 2.394688116   |
| H | 1.1027906743  | -1.616810196  | 3.4419396399  |
| H | 1.3808690633  | 0.0717002867  | 2.9916824412  |
| H | -0.2641192513 | -0.5029574518 | 3.3158261954  |
| H | 1.1665036049  | -3.5982567391 | -2.2188903124 |
| H | 3.4847006034  | -0.8667276281 | 1.2862251795  |
| H | 4.7879988845  | -1.9351183622 | -0.5392440652 |
| H | 3.6525020553  | -3.2619300607 | -2.2940274219 |
| H | -1.7095650539 | 1.0801840353  | -4.8700507261 |
| H | -2.7770511355 | 2.165425576   | -3.9194813238 |
| H | -1.0761978086 | 1.9885921892  | -3.4710630279 |
| H | -0.736575694  | 2.0701347623  | 2.7895729701  |
| H | -3.4910900308 | 2.0307236193  | 3.1860845425  |
| H | -2.3581424679 | -1.0470855386 | -0.9505178891 |
| H | -4.4277105134 | -1.4611096171 | 0.0968629024  |
| H | -5.0586363853 | -0.3677104776 | -1.1537447846 |
| H | -5.3265240095 | 0.1119011903  | 1.6348805084  |

|   |               |              |               |
|---|---------------|--------------|---------------|
| H | -5.2627349648 | 1.4525460611 | 0.4650627167  |
| C | 2.222505215   | 1.7336442772 | 0.5527401255  |
| C | 2.5922038821  | 1.7630095318 | -0.7955276063 |
| C | 3.1651771002  | 1.9682954234 | 1.5577958783  |
| C | 3.9309627334  | 1.9879878247 | -1.120059425  |
| C | 4.4963255093  | 2.2026681827 | 1.2160315294  |
| C | 4.8876973043  | 2.203411587  | -0.1253947626 |
| H | 1.8496949478  | 1.5854448329 | -1.5593112612 |
| H | 2.8433594505  | 1.9590760742 | 2.5937747893  |
| H | 4.2244876315  | 1.9966952258 | -2.1656967399 |
| H | 5.2266671991  | 2.3792483571 | 1.9999882596  |
| H | 5.9254043089  | 2.3771798773 | -0.3924919403 |
| H | 5.9254043089  | 2.3771798773 | -0.3924919403 |

TS 6-31G(d,p) 0012

E(RB3LYP) = -1488.75203680 A.U.

First frequency = -215.4867  $\text{cm}^{-1}$

|   |               |               |               |
|---|---------------|---------------|---------------|
| O | 1.97434915    | -0.6220571046 | 2.9874082015  |
| O | 0.2799585153  | -2.0515676243 | 2.4585023662  |
| O | 0.9550049827  | 1.4369692617  | 0.9975945706  |
| O | 0.7371657881  | 0.5945171355  | -1.1603483299 |
| O | -2.1031615201 | 2.144772819   | -1.6087888496 |
| O | -1.5289653299 | 0.3066734619  | -2.7982694001 |
| N | -0.8683092947 | 0.1973569155  | 0.4709033255  |
| N | -2.934447552  | -0.4366390568 | 0.3723361321  |
| C | 2.9027565656  | -1.0333152446 | 0.0283854111  |
| C | 1.4039218219  | -1.2454208787 | 2.1061551236  |
| C | 1.5682737386  | -1.2962578104 | 0.6690306305  |
| C | -0.1376690538 | -2.6982617383 | 1.3176597159  |
| C | -1.1994620898 | -3.5811257007 | 1.2325629637  |
| C | 0.6570681923  | -2.332667537  | 0.2140102997  |
| C | 0.3995404567  | -2.9200232366 | -1.0260695936 |
| C | -0.659170912  | -3.8351196326 | -1.1338480374 |
| C | -1.4567602261 | -4.1501916731 | -0.026969066  |
| C | 0.5086101427  | 0.5294563247  | 0.0437540987  |
| C | -0.723060073  | 2.3706695778  | -3.588189944  |
| C | -1.536036653  | 1.6424742045  | -2.558103393  |



|   |               |               |               |
|---|---------------|---------------|---------------|
| C | -2.0650604614 | -0.566065881  | -1.805597564  |
| C | -3.6158509091 | -0.6670698257 | -1.8481732058 |
| C | -4.0602181107 | -0.9790685236 | -0.4022894546 |
| C | -1.8408329215 | -0.2127735334 | -0.357367773  |
| C | -1.388652357  | 0.254292834   | 1.7612468426  |
| C | -2.6860807273 | -0.1603946118 | 1.7010900352  |
| H | 2.7694697314  | -0.5815698588 | -0.9599556277 |
| H | 3.4949315138  | -0.3480272527 | 0.6381585106  |
| H | 3.4724072819  | -1.96255239   | -0.0970065455 |
| H | -1.7970932036 | -3.8253149314 | 2.1041787205  |
| H | 1.0009992368  | -2.6609187486 | -1.8918553413 |
| H | -0.8684475339 | -4.3002945545 | -2.0928443495 |
| H | -2.2768468106 | -4.8533611494 | -0.1349671766 |
| H | 0.3306882774  | 2.2092631908  | -3.339457348  |
| H | -0.9020265592 | 1.9692555466  | -4.5875705268 |
| H | -0.9498379854 | 3.4356304057  | -3.5525166116 |
| H | -0.777261539  | 0.5666263096  | 2.5889753309  |
| H | -3.4309911669 | -0.2736262847 | 2.4707221476  |
| H | -1.5914386885 | -1.5275274977 | -2.0074377826 |
| H | -3.9506030767 | -1.424803732  | -2.5560715459 |
| H | -4.007689796  | 0.3046473004  | -2.1535343772 |
| H | -4.1345796589 | -2.0513195079 | -0.205651847  |
| H | -4.9904873518 | -0.4896372595 | -0.1134673653 |
| C | 2.0332062479  | 2.2595385664  | 0.6947269526  |
| C | 1.9788574429  | 3.1551934766  | -0.3742601741 |
| C | 3.1272596818  | 2.2147905506  | 1.5570772674  |
| C | 3.0582252434  | 4.0145834827  | -0.5849893604 |
| C | 4.1952519191  | 3.087011794   | 1.338909265   |
| C | 4.1659299402  | 3.9840289741  | 0.2675001675  |
| H | 1.1060832116  | 3.1701552899  | -1.0149767008 |
| H | 3.1182127585  | 1.4887159044  | 2.3625766803  |
| H | 3.0289123417  | 4.7146220302  | -1.4146901772 |
| H | 5.0527634929  | 3.0608079114  | 2.0046674576  |
| H | 5.0002085324  | 4.6579495338  | 0.098532025   |
| H | 5.0002085324  | 4.6579495338  | 0.098532025   |

TS 6-31G(d,p) 0015

E(RB3LYP) = -1488.74668956 A.U.

First frequency =  $-224.8580 \text{ cm}^{-1}$

|   |               |               |               |
|---|---------------|---------------|---------------|
| O | -1.7865735335 | -1.9581590078 | 1.3920693086  |
| O | -0.366454553  | -2.5294500827 | -0.2843410986 |
| O | 0.9210926293  | 1.5144870938  | 1.0456162609  |
| O | 0.0329118601  | 0.4342102654  | -0.8293492738 |
| O | -2.1113256858 | 1.5195051933  | -3.7338584282 |
| O | -2.9073237864 | 0.7813885807  | -1.822729452  |
| N | -1.2677879279 | 0.9443367054  | 1.0188772921  |
| N | -3.4172503382 | 0.8907150981  | 1.3030192143  |
| C | 0.7034159166  | -0.8612624033 | 2.8430249747  |
| C | -0.6490599293 | -1.9052840417 | 0.9417512748  |
| C | 0.5276865335  | -1.1702354234 | 1.3806028947  |
| C | 0.992256895   | -2.3907159059 | -0.5123672521 |
| C | 1.6797453558  | -2.9423815817 | -1.57870088   |
| C | 1.6028369769  | -1.6497134819 | 0.5108442518  |
| C | 2.9863908104  | -1.4728435031 | 0.4752295567  |
| C | 3.7101695419  | -2.0259492845 | -0.5873392398 |
| C | 3.0674375562  | -2.7417182741 | -1.6054457323 |
| C | 0.0465592443  | 0.63715757    | 0.3869482155  |
| C | -1.5770327956 | -0.7713738601 | -3.2301041647 |
| C | -2.1839253227 | 0.5849096682  | -2.9679973157 |
| C | -2.9098179529 | -0.1668925878 | -0.7417760962 |
| C | -4.3605690507 | -0.5093849116 | -0.3159692829 |
| C | -4.7434647746 | 0.4929152155  | 0.8022331507  |
| C | -2.4240797684 | 0.5273742103  | 0.4912982793  |
| C | -1.5487963442 | 1.5778518143  | 2.2244834346  |
| C | -2.9050846344 | 1.5489187502  | 2.4003131648  |
| H | -0.2550310592 | -0.5880223093 | 3.292056637   |
| H | 1.0918136462  | -1.7292211718 | 3.3891677112  |
| H | 1.4003443185  | -0.0332958841 | 2.9882677658  |
| H | 1.1648005585  | -3.5081318703 | -2.3476061342 |
| H | 3.4895433111  | -0.897188895  | 1.2444722704  |
| H | 4.7866090106  | -1.8887364714 | -0.6274000105 |
| H | 3.648354414   | -3.1538552043 | -2.4249098983 |
| H | -1.1544641235 | -0.7557722897 | -4.23374886   |
| H | -0.7892651416 | -0.9797114422 | -2.5028147592 |
| H | -2.3307561035 | -1.5618872023 | -3.1667634598 |

|   |               |               |               |
|---|---------------|---------------|---------------|
| H | -0.7637557714 | 1.9959381927  | 2.8292518919  |
| H | -3.5232222997 | 1.9369069952  | 3.1927784199  |
| H | -2.3241090045 | -1.0499748254 | -0.9728754918 |
| H | -4.359772175  | -1.522582913  | 0.0900237202  |
| H | -5.0373256268 | -0.4635493077 | -1.1691036278 |
| H | -5.3254422801 | 0.0390558762  | 1.6044393461  |
| H | -5.2655754569 | 1.3774632322  | 0.4308202259  |
| C | 2.216945662   | 1.7239627831  | 0.5998902459  |
| C | 3.1679823084  | 1.9127777391  | 1.6063063754  |
| C | 2.5723375283  | 1.8207459561  | -0.7489051421 |
| C | 4.4951653268  | 2.1673065893  | 1.2632465958  |
| C | 3.9072108291  | 2.0656031415  | -1.0752051502 |
| C | 4.8731148569  | 2.2341579475  | -0.080348602  |
| H | 2.8563939087  | 1.8531903374  | 2.6436931639  |
| H | 1.8221545686  | 1.6815859821  | -1.5132161071 |
| H | 5.2327814741  | 2.3081161662  | 2.047587259   |
| H | 4.1900234773  | 2.1278358433  | -2.1219377624 |
| H | 5.9076648129  | 2.4240052742  | -0.3487166251 |
| H | 5.9076648129  | 2.4240052742  | -0.3487166251 |

TS 6-31G(d,p) 0016

E(RB3LYP) = -1488.74339982 A.U.

First frequency = -188.8248  $\text{cm}^{-1}$

|   |               |               |               |
|---|---------------|---------------|---------------|
| O | 1.4338434647  | -2.1344248556 | -2.3146495092 |
| O | 2.5407861992  | -2.113691154  | -0.3160737514 |
| O | 1.1432006703  | 0.4876347464  | 0.2403733241  |
| O | -0.323253452  | 0.272206588   | -1.5521235682 |
| O | -2.3372874895 | 2.7361048808  | -0.6193207619 |
| O | -3.0008465951 | 1.0117898082  | -1.9253543655 |
| N | -1.0665454942 | 0.1571270175  | 0.6435976978  |
| N | -3.0258467718 | 0.3398445651  | 1.5478915222  |
| C | -1.1221683278 | -2.6393951121 | -0.6852151865 |
| C | 1.3541154577  | -2.17280702   | -1.0952204645 |
| C | 0.2239559498  | -2.1916285409 | -0.2005211862 |
| C | 2.1736087603  | -2.2781126127 | 0.9991039639  |
| C | 3.0384432142  | -2.3363194174 | 2.0753303877  |
| C | 0.7737343249  | -2.4087581685 | 1.1200336017  |

|   |               |               |               |
|---|---------------|---------------|---------------|
| C | 0.2293969449  | -2.6491262108 | 2.385439394   |
| C | 1.0885789102  | -2.7177959502 | 3.491376857   |
| C | 2.4703207888  | -2.5538873071 | 3.342859386   |
| C | -0.0138360708 | 0.0648761936  | -0.3875646473 |
| C | -1.9026551353 | 2.7966702862  | -3.0022245567 |
| C | -2.4290383862 | 2.2277493344  | -1.7184156879 |
| C | -3.3395819085 | 0.228755791   | -0.7818709497 |
| C | -4.660263997  | 0.6840403389  | -0.0932548306 |
| C | -4.4889232137 | 0.3998170048  | 1.4167977418  |
| C | -2.3823146882 | 0.2508568072  | 0.3829130127  |
| C | -0.8902409094 | 0.2194663262  | 2.0241548647  |
| C | -2.1265542744 | 0.3244041549  | 2.5928818256  |
| H | -1.3728900815 | -2.116374288  | -1.6131601809 |
| H | -1.1546445146 | -3.7170563448 | -0.8878539793 |
| H | -1.8993284522 | -2.4297509023 | 0.0578907795  |
| H | 4.1091831801  | -2.2265011058 | 1.9393771981  |
| H | -0.8418896952 | -2.7752729248 | 2.5091919089  |
| H | 0.6747982901  | -2.9019337388 | 4.4787546572  |
| H | 3.1173392039  | -2.6069792659 | 4.213213693   |
| H | -1.7583492479 | 3.8715837221  | -2.8984679863 |
| H | -0.937513258  | 2.3143349399  | -3.1879259339 |
| H | -2.5663340611 | 2.5707644185  | -3.8385622895 |
| H | 0.0919289008  | 0.1857199474  | 2.4583532858  |
| H | -2.4282044291 | 0.3891631811  | 3.6249247633  |
| H | -3.4134443046 | -0.7877530028 | -1.1724568964 |
| H | -5.5270394694 | 0.1734661589  | -0.511729163  |
| H | -4.7679517401 | 1.7568166576  | -0.2567854928 |
| H | -4.9118685404 | -0.5607984967 | 1.719770836   |
| H | -4.8901086037 | 1.1868869354  | 2.0559964534  |
| C | 2.0868156897  | 1.242580593   | -0.4537393733 |
| C | 2.6298399904  | 2.3084201724  | 0.2642558114  |
| C | 2.5212586806  | 0.9384281569  | -1.7443446329 |
| C | 3.6257719567  | 3.0912404208  | -0.3202144016 |
| C | 3.5109090555  | 1.739985783   | -2.3182800926 |
| C | 4.0661950206  | 2.8125472526  | -1.6164177664 |
| H | 2.2653464306  | 2.5089249202  | 1.2662003817  |
| H | 2.1042939615  | 0.0935896069  | -2.2754758381 |
| H | 4.0511031275  | 3.9203192416  | 0.2372668583  |

|   |              |              |               |
|---|--------------|--------------|---------------|
| H | 3.8548499097 | 1.5129163661 | -3.3231349449 |
| H | 4.8387885011 | 3.4230250856 | -2.0736289965 |
| H | 4.8387885011 | 3.4230250856 | -2.0736289965 |

TS 6-311++G(d,p) 0001

E(RB3LYP) = -1489.11931466 A.U.

First frequency = -265.6053 cm<sup>-1</sup>

|   |               |               |               |
|---|---------------|---------------|---------------|
| O | -1.7045154294 | -2.0278977242 | 1.623325873   |
| O | -0.2636621331 | -2.7839020522 | 0.0521492877  |
| O | 0.8654634457  | 1.4760351589  | 0.8186873674  |
| O | 0.0761164466  | 0.1269102853  | -0.9146278545 |
| O | -2.5475350037 | 2.0197607085  | -1.8672555566 |
| O | -2.4517468173 | -0.2164725026 | -2.1366340449 |
| N | -1.3056382304 | 0.8179398097  | 0.8243003009  |
| N | -3.4545173814 | 0.827099868   | 1.0810106137  |
| C | 0.7416639968  | -0.6589478571 | 2.89354669    |
| C | -0.5793126169 | -1.9861190191 | 1.1581267978  |
| C | 0.5657595824  | -1.1413309479 | 1.4772980124  |
| C | 1.0889120681  | -2.6296233419 | -0.1980222578 |
| C | 1.8039736691  | -3.3161837076 | -1.1597810784 |
| C | 1.661462288   | -1.7110959523 | 0.6890108053  |
| C | 3.0346635178  | -1.4858656669 | 0.6271237846  |
| C | 3.7874227945  | -2.1699042787 | -0.3322567894 |
| C | 3.1809251461  | -3.0649090094 | -1.2202200804 |
| C | 0.0399334686  | 0.4717157532  | 0.2610754285  |
| C | -1.4780947497 | 1.0919772257  | -3.8279529372 |
| C | -2.2153042376 | 1.0582084394  | -2.5238607786 |
| C | -2.9744996691 | -0.4584236471 | -0.8258106436 |
| C | -4.5088959186 | -0.2178412099 | -0.732875401  |
| C | -4.7843017134 | 0.3496123034  | 0.6777733179  |
| C | -2.4654128879 | 0.4033782885  | 0.297294042   |
| C | -1.5911239674 | 1.5395152421  | 1.9792734281  |
| C | -2.9432637747 | 1.537567734   | 2.1453391108  |
| H | -0.2174870937 | -0.3698352762 | 3.3257449292  |
| H | 1.1660443395  | -1.447998421  | 3.5237655744  |
| H | 1.4101595447  | 0.2008869062  | 2.934327649   |
| H | 1.3198930797  | -4.0173014293 | -1.8283901814 |

|   |               |               |               |
|---|---------------|---------------|---------------|
| H | 3.5096237501  | -0.7775094531 | 1.2942793326  |
| H | 4.8561254309  | -1.998607953  | -0.3935491741 |
| H | 3.7822460676  | -3.5786850813 | -1.961513916  |
| H | -0.4418320557 | 0.8089759835  | -3.6249896786 |
| H | -1.8947762448 | 0.3686274515  | -4.5296268242 |
| H | -1.5094669306 | 2.0961374601  | -4.2453402453 |
| H | -0.8098150414 | 1.9982613638  | 2.5550485794  |
| H | -3.5634837323 | 1.97894927    | 2.9052783831  |
| H | -2.7074529726 | -1.4940016275 | -0.6236090987 |
| H | -5.0644348664 | -1.1346449353 | -0.9178997719 |
| H | -4.7829305846 | 0.5160521541  | -1.489390735  |
| H | -5.1103160773 | -0.4158671117 | 1.3827069818  |
| H | -5.4968311584 | 1.1726998278  | 0.6824607586  |
| C | 2.1454346848  | 1.7093383682  | 0.3469794034  |
| C | 3.0982308787  | 2.0165342606  | 1.3193709295  |
| C | 2.4821202884  | 1.7259804809  | -1.0080249724 |
| C | 4.4051025378  | 2.3110793553  | 0.9399424765  |
| C | 3.7976033164  | 2.010653047   | -1.3723559636 |
| C | 4.7642417954  | 2.2983174975  | -0.4084931274 |
| H | 2.8065383191  | 2.0150079169  | 2.362394445   |
| H | 1.7341727756  | 1.5001445253  | -1.7514280687 |
| H | 5.1424491543  | 2.5438316329  | 1.6998825     |
| H | 4.0644452304  | 2.0108070097  | -2.4233606294 |
| H | 5.7833067082  | 2.5179655964  | -0.7048945342 |
| H | 5.7833067082  | 2.5179655964  | -0.7048945342 |

TS 6-311++G(d,p) 0012

E(RB3LYP) = -1489.12169391 A.U.

First frequency = -253.3973  $\text{cm}^{-1}$

|   |               |               |               |
|---|---------------|---------------|---------------|
| O | 2.0014545521  | -0.660703528  | 2.9849157136  |
| O | 0.2935239639  | -2.0614108001 | 2.4592776222  |
| O | 0.9778326611  | 1.4336027727  | 0.9870500117  |
| O | 0.7573722373  | 0.5791064562  | -1.1631404789 |
| O | -2.2169333865 | 2.150352094   | -1.6175212087 |
| O | -1.5484573807 | 0.3489151433  | -2.7971635082 |
| N | -0.8609961313 | 0.2038442085  | 0.4609268012  |
| N | -2.9334878144 | -0.4042657643 | 0.357033663   |

|   |               |               |               |
|---|---------------|---------------|---------------|
| C | 2.8992216021  | -1.0453474598 | 0.0323854659  |
| C | 1.405467684   | -1.249950207  | 2.1066141225  |
| C | 1.5501589067  | -1.2699844107 | 0.661038367   |
| C | -0.1259714359 | -2.7098162527 | 1.3179056725  |
| C | -1.1649572164 | -3.6158314306 | 1.241360931   |
| C | 0.6507438623  | -2.3270000557 | 0.2130399388  |
| C | 0.4083362623  | -2.9257588084 | -1.021337168  |
| C | -0.6280579094 | -3.8636790722 | -1.1231757842 |
| C | -1.4129699034 | -4.1925387345 | -0.0142841643 |
| C | 0.5398018101  | 0.5005652723  | 0.0385885109  |
| C | -0.8891688611 | 2.4495648307  | -3.6174747494 |
| C | -1.6319025131 | 1.680430953   | -2.5672953289 |
| C | -2.0488576502 | -0.561006042  | -1.8119623417 |
| C | -3.5944094274 | -0.7256166754 | -1.8667272881 |
| C | -4.0681697099 | -0.9354606893 | -0.4112095601 |
| C | -1.8333352957 | -0.2066241989 | -0.3659328021 |
| C | -1.3915007092 | 0.2902163509  | 1.7441112632  |
| C | -2.6927383736 | -0.1055190293 | 1.6809211254  |
| H | 2.7811550369  | -0.7043781647 | -0.9987969315 |
| H | 3.4633776518  | -0.2889539798 | 0.5780092051  |
| H | 3.4845186189  | -1.9714041427 | 0.0226227709  |
| H | -1.751107601  | -3.8746672849 | 2.1144592299  |
| H | 1.00304738    | -2.6602836776 | -1.8876278023 |
| H | -0.8293337808 | -4.3365405841 | -2.0779406792 |
| H | -2.2164209261 | -4.9125604768 | -0.1178295963 |
| H | 0.1798598172  | 2.2872271562  | -3.4575189617 |
| H | -1.1390685861 | 2.0820917703  | -4.6136881711 |
| H | -1.1186927375 | 3.5092860313  | -3.5310543848 |
| H | -0.7907396882 | 0.6163392942  | 2.5721916988  |
| H | -3.4432517209 | -0.1950001489 | 2.4460445126  |
| H | -1.5321359158 | -1.4925740806 | -2.0317914897 |
| H | -3.8805091341 | -1.553811623  | -2.5115171385 |
| H | -4.0199524672 | 0.1935113411  | -2.2672732371 |
| H | -4.199969556  | -1.9879693998 | -0.1587758452 |
| H | -4.9760186611 | -0.3867961512 | -0.1670099654 |
| C | 2.0653622388  | 2.2476133773  | 0.7021507852  |
| C | 2.0661133765  | 3.1069461305  | -0.3954788897 |
| C | 3.1196145267  | 2.2348441922  | 1.6115818845  |

|   |              |              |               |
|---|--------------|--------------|---------------|
| C | 3.1548452864 | 3.9571519082 | -0.5851471405 |
| C | 4.1973795237 | 3.097299154  | 1.4159763349  |
| C | 4.2210867127 | 3.95625963   | 0.3160717904  |
| H | 1.2312275163 | 3.1014472582 | -1.0817926985 |
| H | 3.0783748053 | 1.5400103905 | 2.4410941678  |
| H | 3.1648852977 | 4.6269498933 | -1.4377104062 |
| H | 5.0209830355 | 3.092510558  | 2.1210131479  |
| H | 5.0623847726 | 4.6223967275 | 0.1631897567  |
| H | 5.0623847726 | 4.6223967275 | 0.1631897567  |

TS 6-311++G(d,p) 0015

E(RB3LYP) = -1489.11810094 A.U.

First frequency = -274.4271  $\text{cm}^{-1}$

|   |               |               |               |
|---|---------------|---------------|---------------|
| O | -1.7552864767 | -2.0045935416 | 1.4210196841  |
| O | -0.349909226  | -2.5659178138 | -0.2585367454 |
| O | 0.9200911648  | 1.4982242754  | 1.0534877945  |
| O | 0.0380703315  | 0.4089627197  | -0.8137637717 |
| O | -2.0914672464 | 1.4907630667  | -3.7630332332 |
| O | -2.8664109293 | 0.8033580846  | -1.8313728499 |
| N | -1.2703125596 | 0.9194553344  | 1.0311080129  |
| N | -3.4201496872 | 0.8963784733  | 1.3028214176  |
| C | 0.7369144511  | -0.8778445354 | 2.8416765251  |
| C | -0.6312976256 | -1.9305120741 | 0.95754596    |
| C | 0.5400209126  | -1.1707431064 | 1.3778756158  |
| C | 1.0065269718  | -2.4203284159 | -0.4979372559 |
| C | 1.6915377297  | -2.9820310196 | -1.5572476822 |
| C | 1.6134677611  | -1.6578406568 | 0.5061849427  |
| C | 2.9932260914  | -1.4716179067 | 0.4639675397  |
| C | 3.7167781677  | -2.0349530408 | -0.5912847975 |
| C | 3.0758271187  | -2.7701211122 | -1.5941088036 |
| C | 0.0514617716  | 0.6035511424  | 0.3995346034  |
| C | -1.5931012955 | -0.7959977846 | -3.2277140606 |
| C | -2.1706950525 | 0.5721423773  | -2.9823407909 |
| C | -2.9186068853 | -0.1456795991 | -0.7465359087 |
| C | -4.3875499536 | -0.4453793635 | -0.3539764022 |
| C | -4.752387308  | 0.5306076566  | 0.7918481393  |
| C | -2.4301359854 | 0.5304977946  | 0.4925329786  |



|   |               |               |               |
|---|---------------|---------------|---------------|
| C | -1.5486526116 | 1.5464418042  | 2.2397138766  |
| C | -2.9040515476 | 1.5367823696  | 2.4080385976  |
| H | -0.2034245057 | -0.5782440606 | 3.3073130531  |
| H | 1.1034645739  | -1.7635391927 | 3.3713822402  |
| H | 1.4610240244  | -0.0757655124 | 2.9839628182  |
| H | 1.1799406435  | -3.5621196338 | -2.3152723205 |
| H | 3.4956875254  | -0.8826925968 | 1.2209690647  |
| H | 4.790269669   | -1.8918462329 | -0.6378092086 |
| H | 3.6555284101  | -3.1896436065 | -2.4082598766 |
| H | -1.1650130019 | -0.8059490703 | -4.2272712873 |
| H | -0.8160487002 | -1.0112893058 | -2.4931244433 |
| H | -2.3648547479 | -1.566255473  | -3.1570298713 |
| H | -0.7638821724 | 1.9475630933  | 2.8534137432  |
| H | -3.5187489497 | 1.9244221361  | 3.2011121121  |
| H | -2.3554095789 | -1.0425849922 | -0.9728750741 |
| H | -4.4415815865 | -1.4717495011 | 0.0083496509  |
| H | -5.0444842453 | -0.3395860529 | -1.2150098982 |
| H | -5.337634178  | 0.0618373096  | 1.5804337212  |
| H | -5.2611464713 | 1.4310427786  | 0.4470809485  |
| C | 2.2109894265  | 1.7282928178  | 0.6051736232  |
| C | 3.1650641951  | 1.9158947538  | 1.6058823941  |
| C | 2.5581532132  | 1.8464087614  | -0.7416479415 |
| C | 4.4847490239  | 2.1936646721  | 1.2596919468  |
| C | 3.8856111685  | 2.1149897434  | -1.072944185  |
| C | 4.8537931259  | 2.2841965102  | -0.0830897645 |
| H | 2.8643297226  | 1.8351443354  | 2.6432501663  |
| H | 1.8094443101  | 1.7096204172  | -1.5057420154 |
| H | 5.2238182251  | 2.3331001223  | 2.0404703934  |
| H | 4.1606570551  | 2.1946383675  | -2.1187256119 |
| H | 5.8822736359  | 2.4919723692  | -0.3544047087 |
| H | 5.8822736359  | 2.4919723692  | -0.3544047087 |

TS 6-311++G(d,p) 0016

E(RB3LYP) = -1489.11522619 A.U.

First frequency = -216.1896  $\text{cm}^{-1}$

|   |              |               |               |
|---|--------------|---------------|---------------|
| O | 1.507956253  | -2.2363182785 | -2.2831457057 |
| O | 2.5618726278 | -2.2220641518 | -0.2693673115 |

|   |               |               |               |
|---|---------------|---------------|---------------|
| O | 1.2101487529  | 0.4129703227  | 0.219120293   |
| O | -0.2736088957 | 0.2220394347  | -1.5550704528 |
| O | -2.2971087086 | 2.7475266187  | -0.6164565718 |
| O | -2.9620187369 | 1.0259267446  | -1.9109700466 |
| N | -1.0169135471 | 0.1420262459  | 0.6406400789  |
| N | -2.9638766463 | 0.3910812135  | 1.5505519671  |
| C | -1.0934162461 | -2.6690536143 | -0.7015051465 |
| C | 1.3961122682  | -2.2412698302 | -1.0715797135 |
| C | 0.2414419683  | -2.197974717  | -0.2032740312 |
| C | 2.1628703195  | -2.3662672541 | 1.0402313627  |
| C | 3.0016428639  | -2.4614092177 | 2.131332838   |
| C | 0.7615533916  | -2.4383427864 | 1.1306390589  |
| C | 0.1804486014  | -2.6666393688 | 2.3784289356  |
| C | 1.0102848738  | -2.774889134  | 3.5011728089  |
| C | 2.3983739059  | -2.6612013337 | 3.3835408561  |
| C | 0.0368975878  | -0.0083788106 | -0.3995730455 |
| C | -1.9544888729 | 2.8453732842  | -3.0088130318 |
| C | -2.4114047239 | 2.2488282992  | -1.7133891418 |
| C | -3.2912999013 | 0.2245089126  | -0.7717616044 |
| C | -4.6216741724 | 0.6584888267  | -0.0886219901 |
| C | -4.4262944912 | 0.4788482116  | 1.4344336304  |
| C | -2.331640418  | 0.2502006357  | 0.3875070258  |
| C | -0.8298238915 | 0.2527502697  | 2.0153971332  |
| C | -2.0572510218 | 0.4013226319  | 2.5880929321  |
| H | -1.347816185  | -2.1627878957 | -1.635250079  |
| H | -1.0965918603 | -3.747920279  | -0.8916097611 |
| H | -1.8783002355 | -2.469391434  | 0.0330877997  |
| H | 4.077063164   | -2.3942661823 | 2.0206769662  |
| H | -0.8952713683 | -2.7535118899 | 2.4793590211  |
| H | 0.5697959319  | -2.9489476412 | 4.4765875465  |
| H | 3.0224218002  | -2.7427505485 | 4.266069443   |
| H | -1.7563428344 | 3.9068933778  | -2.8770978314 |
| H | -1.03280996   | 2.3328173295  | -3.2971500049 |
| H | -2.6927664522 | 2.6835038255  | -3.7947398754 |
| H | 0.1528188505  | 0.2187978123  | 2.4448118441  |
| H | -2.3495106787 | 0.5072775404  | 3.6177338739  |
| H | -3.3521835446 | -0.7834298867 | -1.1786210284 |
| H | -5.4625798737 | 0.0779048524  | -0.4613869818 |

|   |               |               |               |
|---|---------------|---------------|---------------|
| H | -4.7935334163 | 1.7083208312  | -0.3203770945 |
| H | -4.8668098815 | -0.4444601267 | 1.8115039031  |
| H | -4.7953787288 | 1.3195242104  | 2.0194411524  |
| C | 2.0993265679  | 1.2346076823  | -0.4693476137 |
| C | 2.556320004   | 2.3487999522  | 0.2307822881  |
| C | 2.5676711709  | 0.9423297849  | -1.7479394842 |
| C | 3.498006243   | 3.1898853972  | -0.3597230349 |
| C | 3.5011598722  | 1.7996054536  | -2.3309975164 |
| C | 3.9700301023  | 2.9204988085  | -1.6448780924 |
| H | 2.170749979   | 2.5426469161  | 1.2243697549  |
| H | 2.2108168973  | 0.0661382183  | -2.2693632141 |
| H | 3.8563984541  | 4.0566366238  | 0.1839123695  |
| H | 3.868495748   | 1.5807044069  | -3.3273656849 |
| H | 4.6995205658  | 3.5761806902  | -2.1060870208 |
| H | 4.6995205658  | 3.5761806902  | -2.1060870208 |

## 5 Diels-Alder

### 5.1 Endo

#### 5.1.1 Starting TS

TS endo input

E(RB3LYP) = -706.409984153 A.U.

First frequency = -508.8645  $\text{cm}^{-1}$

|   |               |               |               |
|---|---------------|---------------|---------------|
| H | -1.7533835602 | -0.3307583447 | -2.1770495961 |
| C | -1.3240993767 | -0.8130791624 | -1.3035963497 |
| H | -0.6170048622 | -1.5969641774 | -1.5457130185 |
| C | -2.0292809878 | -0.8412806056 | -0.1031238053 |
| C | -1.3782329838 | -1.3883390581 | 1.0261593403  |
| C | -0.1313434184 | -1.9839739555 | 0.9641935756  |
| H | 0.3550035073  | -2.2870835416 | 1.8862765076  |
| H | 0.1708634734  | -2.5464344037 | 0.0890143379  |
| C | 1.3033001712  | -0.433456365  | 0.026438694   |
| H | 1.4807709643  | -0.1023070357 | 1.0465078836  |
| C | 2.3499409765  | -1.3503221063 | -0.5760633565 |
| C | 0.5221907412  | 0.3808646769  | -0.7900135963 |

|   |               |               |               |
|---|---------------|---------------|---------------|
| H | 0.743598111   | 0.3760512217  | -1.8561476746 |
| C | -0.0635512869 | 1.6566328777  | -0.2367599532 |
| C | -3.4388777875 | -0.2166902028 | -0.0045020391 |
| H | -1.7868451042 | -1.1882566333 | 2.0113606399  |
| C | -4.4039553002 | -1.1481482582 | -0.779445496  |
| C | -3.5083851606 | 1.1939914915  | -0.6277196612 |
| C | -3.940217536  | -0.1089923859 | 1.4481379033  |
| H | -3.9994917088 | -1.0881835557 | 1.933363616   |
| H | -4.9454422966 | 0.3248214245  | 1.4604956677  |
| H | -3.2929838579 | 0.535559674   | 2.0522696632  |
| H | -3.1576663173 | 1.2094228889  | -1.6632319791 |
| H | -2.9095889975 | 1.9076017311  | -0.0565757146 |
| H | -4.5449237854 | 1.5491788405  | -0.6293487683 |
| H | -4.1216635942 | -1.2144234605 | -1.8346952505 |
| H | -5.4333915723 | -0.7746231282 | -0.7235888589 |
| H | -4.3840202114 | -2.1610029555 | -0.3640558123 |
| H | -0.5984240218 | 1.4221752267  | 0.6942101379  |
| H | -0.8076944299 | 2.0593164964  | -0.931110526  |
| C | 0.9905786876  | 2.7412422104  | 0.0483107972  |
| H | 1.7334263279  | 2.3510358504  | 0.7565749959  |
| C | 0.3797103604  | 4.0324752954  | 0.6041676456  |
| H | 1.5425965262  | 2.965882156   | -0.8752319528 |
| H | -0.1756048216 | 3.800717876   | 1.5235278448  |
| H | -0.3624487022 | 4.4176820794  | -0.1084998221 |
| C | 1.4247471988  | 5.113865065   | 0.8928818875  |
| H | 2.1600638787  | 4.7644801932  | 1.6267662353  |
| H | 0.9643827128  | 6.0247987195  | 1.2894222481  |
| H | 1.9720069005  | 5.3851795634  | -0.0171931851 |
| C | 3.1742175494  | -2.1367471854 | 0.4505120552  |
| H | 3.0279750818  | -0.7448414335 | -1.1929168092 |
| H | 1.8723323498  | -2.0526782304 | -1.2779624421 |
| H | 3.6657342484  | -1.4256459534 | 1.1300073285  |
| C | 4.2338526747  | -3.0622714966 | -0.1668321262 |
| H | 2.5010061663  | -2.7363569173 | 1.0729806853  |
| C | 5.3528646903  | -2.3300963471 | -0.9168469117 |
| H | 3.7401815269  | -3.7711570953 | -0.8459904396 |
| H | 4.678557793   | -3.6682812238 | 0.6326715552  |
| H | 4.9730365354  | -1.7853472684 | -1.7869659004 |

|   |              |               |               |
|---|--------------|---------------|---------------|
| H | 6.1126658869 | -3.031827834  | -1.276013928  |
| H | 5.8511684674 | -1.6039055193 | -0.2639301612 |
| H | 5.8511684674 | -1.6039055193 | -0.2639301612 |

### 5.1.2 Lowest TS

TS endo 0008

E(RB3LYP) = -706.415808049 A.U.

First frequency = -505.0983 cm<sup>-1</sup>

|   |               |               |               |
|---|---------------|---------------|---------------|
| H | -1.895706556  | -0.3941229586 | -2.0892112311 |
| C | -1.529840026  | -1.0199381476 | -1.2837428545 |
| H | -0.8464658642 | -1.7941283269 | -1.610625562  |
| C | -2.2673043633 | -1.1897090853 | -0.1167210011 |
| C | -1.6719065011 | -1.9281911174 | 0.9325302505  |
| C | -0.4252941696 | -2.5183670983 | 0.8248840091  |
| H | 0.0314036566  | -2.9701191511 | 1.7012065071  |
| H | -0.0957157631 | -2.9403441866 | -0.1167967795 |
| C | 1.0153017535  | -0.8594158872 | 0.2441751858  |
| H | 1.0853212935  | -0.6091795118 | 1.2990535425  |
| C | 2.1332988946  | -1.7142478564 | -0.3175832321 |
| C | 0.3250621551  | 0.0348672678  | -0.5744747132 |
| H | 0.6273185262  | 0.0853312837  | -1.6186519902 |
| C | -0.2593904366 | 1.2960130967  | 0.0214221906  |
| C | -3.6294831568 | -0.503407252  | 0.1216506577  |
| H | -2.1239211948 | -1.8757731215 | 1.9201282189  |
| C | -3.6340140305 | 0.3786330417  | 1.3912892467  |
| C | -4.6826016915 | -1.6252759817 | 0.2939682107  |
| C | -4.0559459458 | 0.3803116332  | -1.0642814883 |
| H | -5.0343033529 | 0.8277595057  | -0.8606195502 |
| H | -4.1417145676 | -0.1967637992 | -1.990297778  |
| H | -3.3468734338 | 1.197428549   | -1.2337425263 |
| H | -5.6797913405 | -1.1974910485 | 0.4505137906  |
| H | -4.4486110774 | -2.2617490482 | 1.1528313184  |
| H | -4.7186205427 | -2.2640319106 | -0.594447964  |
| H | -3.3503942822 | -0.1807435158 | 2.286708659   |
| H | -4.6378083193 | 0.7835191467  | 1.5626950553  |
| H | -2.9464991399 | 1.2225472011  | 1.288861306   |

|   |               |               |               |
|---|---------------|---------------|---------------|
| H | -0.8570087504 | 1.0136927424  | 0.8954450476  |
| H | -0.9470051049 | 1.7690246936  | -0.6905818515 |
| C | 0.803021722   | 2.3221819032  | 0.4653904168  |
| H | 0.2979589388  | 3.1785508617  | 0.934049243   |
| C | 1.7042374965  | 2.8278257373  | -0.6662562847 |
| H | 1.428517452   | 1.8707144965  | 1.2470179775  |
| H | 1.0837792608  | 3.3029100089  | -1.4388115603 |
| H | 2.192800317   | 1.9732156271  | -1.1496185952 |
| C | 2.7735163157  | 3.8094960986  | -0.1795117    |
| H | 3.4332680744  | 3.3338273487  | 0.5553361181  |
| H | 2.3207329032  | 4.6846851196  | 0.300620568   |
| H | 3.3985473211  | 4.1672322903  | -1.0044389034 |
| C | 3.4061737133  | -0.9148987787 | -0.6656635733 |
| H | 1.781673214   | -2.2151352656 | -1.2307664928 |
| H | 2.3907254122  | -2.5114832199 | 0.3912292792  |
| H | 4.1448014739  | -1.594810371  | -1.1129986727 |
| C | 4.043807774   | -0.1948771044 | 0.5274841384  |
| H | 3.1593292176  | -0.1765718798 | -1.4402347041 |
| C | 5.2775735797  | 0.6224357707  | 0.1352627542  |
| H | 4.3127870043  | -0.9338671575 | 1.2948982322  |
| H | 3.3031578379  | 0.4692857066  | 0.9882624175  |
| H | 5.7245637689  | 1.1186875945  | 1.0029970846  |
| H | 5.0152389735  | 1.3986550548  | -0.5928228962 |
| H | 6.0469127652  | -0.0118060169 | -0.3200836177 |
| H | 6.0469127652  | -0.0118060169 | -0.3200836177 |

### 5.1.3 Additional TS

TS endo 0001

E(RB3LYP) = -706.414690851 A.U.

First frequency = -508.4605  $\text{cm}^{-1}$

|   |               |               |               |
|---|---------------|---------------|---------------|
| H | -1.6199133862 | -0.6372306894 | -2.1822833559 |
| C | -1.3277644677 | -1.143473892  | -1.2697386594 |
| H | -0.6281337466 | -1.9549470911 | -1.427409717  |
| C | -2.1599913763 | -1.1487702996 | -0.1553734741 |
| C | -1.6594707188 | -1.7314043078 | 1.0319924012  |
| C | -0.4086645451 | -2.3165542011 | 1.1119049185  |

|   |               |               |               |
|---|---------------|---------------|---------------|
| H | -0.0276609311 | -2.6389576289 | 2.0770891766  |
| H | 0.0011391627  | -2.8587443855 | 0.2680789439  |
| C | 1.0729108595  | -0.7360034183 | 0.444228768   |
| H | 1.0426418641  | -0.3214719666 | 1.4496796926  |
| C | 2.2525305268  | -1.6330931701 | 0.1418561622  |
| C | 0.4690080478  | 0.0123560877  | -0.5671989183 |
| H | 0.8754873909  | -0.0936024817 | -1.5726082404 |
| C | -0.148204598  | 1.3515205808  | -0.2427515434 |
| C | -3.5255813153 | -0.4296484599 | -0.1228853184 |
| H | -2.1915595659 | -1.5441304594 | 1.961755816   |
| C | -3.8668439141 | 0.2418403786  | -1.4652615531 |
| C | -3.5915224926 | 0.6543504294  | 0.9775485457  |
| C | -4.6045791941 | -1.5009119809 | 0.1686661573  |
| H | -5.602308405  | -1.0470566884 | 0.1879480064  |
| H | -4.4355431138 | -1.9854624362 | 1.1350321603  |
| H | -4.5966021297 | -2.2797823987 | -0.6006850292 |
| H | -2.8861322456 | 1.4646202169  | 0.7754401682  |
| H | -3.3672665202 | 0.251549432   | 1.9689410995  |
| H | -4.5974512577 | 1.0873745952  | 1.018994165   |
| H | -4.8542945526 | 0.7111053891  | -1.4048413643 |
| H | -3.8923596549 | -0.4824103552 | -2.2855287822 |
| H | -3.1449478539 | 1.0243308508  | -1.7214673349 |
| H | -0.7256571259 | 1.2526943094  | 0.6844886323  |
| H | -0.8595438013 | 1.6502428548  | -1.0222870276 |
| C | 0.8992162024  | 2.4644891034  | -0.064424676  |
| H | 1.6011188975  | 2.17436073    | 0.7289045897  |
| C | 0.2768687329  | 3.8249863199  | 0.2685680896  |
| H | 1.4992181203  | 2.5508331813  | -0.9815252392 |
| H | -0.3239991724 | 3.7312198311  | 1.1836633405  |
| H | -0.426146252  | 4.105833492   | -0.5276417167 |
| C | 1.319260499   | 4.9321966566  | 0.4484271244  |
| H | 1.9119172962  | 5.0664398829  | -0.4637524857 |
| H | 2.0150554882  | 4.6893654057  | 1.2597081683  |
| H | 0.8510063214  | 5.89291023    | 0.6865639868  |
| C | 3.5733508488  | -0.8510378218 | 0.0284274775  |
| H | 2.0732920951  | -2.1672938543 | -0.8027176719 |
| H | 2.3617520078  | -2.4044730577 | 0.9150692232  |
| H | 3.4738286707  | -0.0941584579 | -0.7610722728 |

|   |              |               |               |
|---|--------------|---------------|---------------|
| C | 4.7847989481 | -1.744113679  | -0.2607957648 |
| H | 3.7432799649 | -0.2939947548 | 0.9606243719  |
| C | 6.0929159805 | -0.9561947963 | -0.3757635149 |
| H | 4.6076736055 | -2.3024287199 | -1.190344884  |
| H | 4.8767418275 | -2.4981089453 | 0.5328889759  |
| H | 6.9432369523 | -1.6139584616 | -0.5834944908 |
| H | 6.3086490018 | -0.414185383  | 0.5521069571  |
| H | 6.0372572139 | -0.2169165366 | -1.1829850944 |
| H | 6.0372572139 | -0.2169165366 | -1.1829850944 |

TS endo 0005

E(RB3LYP) = -706.414893150 A.U.

First frequency = -507.8112  $\text{cm}^{-1}$

|   |               |               |               |
|---|---------------|---------------|---------------|
| H | -1.8097235766 | -0.5783304237 | -2.1999437041 |
| C | -1.467419198  | -1.1534095133 | -1.3475561495 |
| H | -0.8480294001 | -2.0005892083 | -1.615608722  |
| C | -2.1881043997 | -1.1677959919 | -0.1577138385 |
| C | -1.6199210169 | -1.8502666129 | 0.9429122858  |
| C | -0.4148630084 | -2.5248277678 | 0.8686254705  |
| H | 0.0329358082  | -2.9256428046 | 1.7738457305  |
| H | -0.1280608216 | -3.0440800605 | -0.0378798999 |
| C | 1.1079047221  | -1.0073584656 | 0.1257448401  |
| H | 1.1990976496  | -0.6577661543 | 1.1505171131  |
| C | 2.1741272174  | -1.9701269604 | -0.352935712  |
| C | 0.460394617   | -0.1620001552 | -0.7763680913 |
| H | 0.7575444094  | -0.2328411979 | -1.8224024725 |
| C | -0.020802186  | 1.194845838   | -0.3205534322 |
| C | -3.4889519421 | -0.3622425908 | 0.0465325155  |
| H | -2.0453746335 | -1.6804971824 | 1.9292640964  |
| C | -3.9080691186 | 0.406032252   | -1.2197233799 |
| C | -3.3710091084 | 0.6592092044  | 1.2011487468  |
| C | -4.6093648142 | -1.3740467327 | 0.3898524368  |
| H | -4.730923062  | -2.1067728352 | -0.4144751896 |
| H | -5.5654970243 | -0.8565552046 | 0.5306535518  |
| H | -4.38407026   | -1.9228450559 | 1.3092501881  |
| H | -2.631879159  | 1.4309196261  | 0.9706751945  |
| H | -3.0822016125 | 0.1864986582  | 2.1437800796  |



|   |               |               |               |
|---|---------------|---------------|---------------|
| H | -4.3346111452 | 1.1551335541  | 1.3643111566  |
| H | -4.8487334275 | 0.9360536701  | -1.0376924065 |
| H | -4.0642839056 | -0.2667769767 | -2.0688169769 |
| H | -3.1595485736 | 1.1518970728  | -1.5068497479 |
| H | -0.5099434817 | 1.0818617623  | 0.6545716038  |
| H | -0.7809291382 | 1.5873775463  | -1.0069560108 |
| C | 1.1192011802  | 2.2204163878  | -0.1930820071 |
| H | 1.8665880278  | 1.8413443807  | 0.5167342565  |
| C | 0.6365014113  | 3.6027760089  | 0.2595974174  |
| H | 1.6383001993  | 2.3111704265  | -1.1578219065 |
| H | 0.1128404616  | 3.5039955864  | 1.2204443967  |
| H | -0.1093230892 | 3.9776577301  | -0.4546703119 |
| C | 1.7749481345  | 4.6178110129  | 0.3957602001  |
| H | 2.5176141846  | 4.2798249542  | 1.1275593193  |
| H | 1.4069484151  | 5.5963833422  | 0.7211067127  |
| H | 2.2943510179  | 4.7568120733  | -0.5593404188 |
| C | 3.5235144877  | -1.2865504389 | -0.6551128048 |
| H | 1.8219094834  | -2.4680037405 | -1.2672967261 |
| H | 2.3352846814  | -2.7636249739 | 0.3881265286  |
| H | 4.2072721808  | -2.0245680774 | -1.0976926701 |
| C | 4.1937089633  | -0.6592450335 | 0.572631524   |
| H | 3.3661455138  | -0.510890925  | -1.4166895189 |
| C | 5.5355541205  | 0.0002168091  | 0.242865794   |
| H | 4.3384453725  | -1.4331000714 | 1.3393582789  |
| H | 3.521288341   | 0.0863932109  | 1.0143673733  |
| H | 5.4073541852  | 0.8006239434  | -0.4948853692 |
| H | 6.2406048948  | -0.7258594065 | -0.1780899259 |
| H | 5.9991434205  | 0.4383906257  | 1.1328054296  |
| H | 5.9991434205  | 0.4383906257  | 1.1328054296  |

TS endo 0010

E(RB3LYP) = -706.414694895 A.U.

First frequency = -518.2033  $\text{cm}^{-1}$

|   |               |               |               |
|---|---------------|---------------|---------------|
| H | -1.480388838  | -0.8304824643 | -2.1588092133 |
| C | -1.2662691282 | -1.2997125766 | -1.2055734057 |
| H | -0.6371393213 | -2.1774940491 | -1.2863912249 |
| C | -2.142416364  | -1.1678455201 | -0.131358907  |

|   |               |               |               |
|---|---------------|---------------|---------------|
| C | -1.7374596201 | -1.7082619892 | 1.1097520132  |
| C | -0.5422584729 | -2.3867930751 | 1.2754965168  |
| H | -0.2229637584 | -2.6755267772 | 2.2732737973  |
| H | -0.1591255569 | -3.0216668044 | 0.4854044587  |
| C | 1.0981299574  | -1.0024571075 | 0.571346445   |
| H | 1.0811723258  | -0.5329761877 | 1.5532180269  |
| C | 2.1975484259  | -2.0234590817 | 0.3663861604  |
| C | 0.5780937622  | -0.2562780152 | -0.4905723856 |
| H | 1.0010090628  | -0.4308483406 | -1.4780852881 |
| C | 0.042384977   | 1.1317205497  | -0.228380284  |
| C | -3.4473553721 | -0.3461543474 | -0.2067149134 |
| H | -2.2856863125 | -1.4185857673 | 2.0031452265  |
| C | -3.6765243799 | 0.2647776857  | -1.600857429  |
| C | -3.4792850224 | 0.8052900937  | 0.82450448    |
| C | -4.6174794357 | -1.3145244833 | 0.0938555663  |
| H | -4.6346959685 | -2.1386126367 | -0.6266866345 |
| H | -5.5774010121 | -0.788066039  | 0.0369404371  |
| H | -4.5290638678 | -1.7485609116 | 1.0943726061  |
| H | -4.4513678175 | 1.3104327967  | 0.7934275471  |
| H | -2.7082238769 | 1.549613849   | 0.6094314392  |
| H | -3.3280846469 | 0.4490451449  | 1.8470570514  |
| H | -2.884858188  | 0.9726099781  | -1.8679263834 |
| H | -4.6255290836 | 0.8107671014  | -1.6150502334 |
| H | -3.7239205411 | -0.5047623412 | -2.3777440308 |
| H | -0.5746822412 | 1.0954070737  | 0.6777577145  |
| H | -0.6198312243 | 1.4501361683  | -1.042371181  |
| C | 1.1439053945  | 2.1887438503  | -0.0373782221 |
| H | 1.8109741775  | 1.8734895119  | 0.7762382165  |
| C | 0.5865707425  | 3.5840231661  | 0.2658783957  |
| H | 1.7677065862  | 2.2350064856  | -0.9412211898 |
| H | -0.0368948217 | 3.5333821811  | 1.1691412183  |
| H | -0.0843352109 | 3.890365685   | -0.5484092177 |
| C | 1.6818652947  | 4.6373895799  | 0.4542090873  |
| H | 1.2600465675  | 5.6242335553  | 0.6711562661  |
| H | 2.2991037983  | 4.7286247513  | -0.4469084691 |
| H | 2.3473926778  | 4.368933038   | 1.2826341337  |
| C | 3.6210876592  | -1.430257724  | 0.4385429433  |
| H | 2.0618417534  | -2.5148639346 | -0.6079417659 |

|   |              |               |               |
|---|--------------|---------------|---------------|
| H | 2.1236962598 | -2.8149127676 | 1.1222441481  |
| H | 3.7358301761 | -0.8948602679 | 1.3918843359  |
| C | 3.9908960683 | -0.492390952  | -0.71514766   |
| H | 4.3424287578 | -2.2589155801 | 0.4675388909  |
| C | 5.4220948036 | 0.0415627372  | -0.6068215789 |
| H | 3.2889400802 | 0.3473737257  | -0.7429419106 |
| H | 3.8662279834 | -1.0273054848 | -1.6671179332 |
| H | 6.1525955468 | -0.7757115494 | -0.6050932216 |
| H | 5.5600981881 | 0.6079221545  | 0.3215049917  |
| H | 5.6673249982 | 0.7066169869  | -1.4413861652 |
| H | 5.6673249982 | 0.7066169869  | -1.4413861652 |

TS endo 0015

E(RB3LYP) = -706.414062402 A.U.

First frequency = -521.2554  $\text{cm}^{-1}$

|   |               |               |               |
|---|---------------|---------------|---------------|
| H | -1.6918991416 | -0.7782687756 | -2.1828683726 |
| C | -1.3803209803 | -1.1909131879 | -1.2302849637 |
| H | -0.6199829249 | -1.957450201  | -1.3183022329 |
| C | -2.2386300959 | -1.1862301084 | -0.1338155337 |
| C | -1.7210058341 | -1.6380526773 | 1.1003505368  |
| C | -0.4277881865 | -2.1114759141 | 1.2408576962  |
| H | -0.0418339147 | -2.3299237888 | 2.2329483406  |
| H | 0.0327601286  | -2.6894470657 | 0.4484284833  |
| C | 0.934394005   | -0.4860235972 | 0.4715878757  |
| H | 0.8725888762  | -0.0126055143 | 1.4478377043  |
| C | 2.1668184019  | -1.3290949883 | 0.2215553014  |
| C | 0.2899205741  | 0.1543216549  | -0.5913556581 |
| H | 0.7211325264  | 0.012500576   | -1.5826242251 |
| C | -0.4368333173 | 1.4654354768  | -0.3891422536 |
| C | -3.6567047707 | -0.5781767242 | -0.177196896  |
| H | -2.2855984353 | -1.4263687153 | 2.0054496126  |
| C | -4.0287165944 | -0.0549584621 | -1.5761959517 |
| C | -3.8208281615 | 0.5877488803  | 0.8246197252  |
| C | -4.6546864886 | -1.7010732498 | 0.1967516683  |
| H | -5.6843719712 | -1.3259305212 | 0.1679612925  |
| H | -4.4644566313 | -2.086688611  | 1.2028117797  |
| H | -4.5755307404 | -2.539987346  | -0.5022420996 |

|   |               |               |               |
|---|---------------|---------------|---------------|
| H | -3.170379496  | 1.4261428489  | 0.5625166191  |
| H | -3.5860027029 | 0.2871297104  | 1.8493203271  |
| H | -4.8556462709 | 0.9486934099  | 0.8167388359  |
| H | -5.0530706946 | 0.3317647403  | -1.5672632787 |
| H | -3.9778832021 | -0.8463296459 | -2.3306840804 |
| H | -3.3716904783 | 0.7618842577  | -1.8926044927 |
| H | -0.932576218  | 1.4466614893  | 0.5892451762  |
| H | -1.2310001749 | 1.5713366256  | -1.1362095169 |
| C | 0.4719357565  | 2.7104928975  | -0.4763961265 |
| H | 1.0203982236  | 2.6889501272  | -1.4291814531 |
| C | 1.4683282115  | 2.8746307138  | 0.6761303172  |
| H | -0.1691210212 | 3.602421576   | -0.5175161791 |
| H | 2.1333882642  | 2.0059481777  | 0.7125615744  |
| H | 0.9186284419  | 2.8794186179  | 1.6277342763  |
| C | 2.3041726877  | 4.1522062246  | 0.5560780937  |
| H | 2.8863384264  | 4.1542222798  | -0.3727777476 |
| H | 3.0075307873  | 4.2527481514  | 1.3892734433  |
| H | 1.6674796659  | 5.0444716587  | 0.5467963752  |
| C | 3.4464321446  | -0.4928801043 | 0.0427892957  |
| H | 2.0128051701  | -1.9355726431 | -0.6832509228 |
| H | 2.3224362031  | -2.0397507866 | 1.0433412252  |
| H | 3.2982243295  | 0.2193065938  | -0.7800401725 |
| C | 4.6927261763  | -1.3424324655 | -0.2292598654 |
| H | 3.61030922    | 0.1140043733  | 0.9442241808  |
| C | 5.9604341253  | -0.5011479579 | -0.4033950991 |
| H | 4.5259321543  | -1.9494735756 | -1.1296754883 |
| H | 4.8326632276  | -2.0547459744 | 0.5952662266  |
| H | 5.8564703943  | 0.1981794053  | -1.2408742058 |
| H | 6.8368709332  | -1.1277178723 | -0.5984078421 |
| H | 6.1663042407  | 0.090963377   | 0.4956370513  |
| H | 6.1663042407  | 0.090963377   | 0.4956370513  |

TS endo 0017

E(RB3LYP) = -706.414722049 A.U.

First frequency = -506.3276  $\text{cm}^{-1}$

|   |               |               |               |
|---|---------------|---------------|---------------|
| H | -1.7310473524 | -0.0296853867 | -2.147332798  |
| C | -1.4158455724 | -0.7539721843 | -1.4054918581 |

|   |               |               |               |
|---|---------------|---------------|---------------|
| H | -0.6586832495 | -1.4411476984 | -1.7619113164 |
| C | -2.2572430397 | -1.1253557924 | -0.362591486  |
| C | -1.7305191469 | -1.9856563614 | 0.6286557331  |
| C | -0.4432872785 | -2.4902076778 | 0.5785804822  |
| H | -0.0527049447 | -3.0477559414 | 1.425503655   |
| H | 0.0107319519  | -2.7477333005 | -0.3709404654 |
| C | 0.9358494709  | -0.7031896616 | 0.4297157951  |
| H | 0.8658457075  | -0.5899810463 | 1.5095896177  |
| C | 2.1784482694  | -1.4052941424 | -0.0715163325 |
| C | 0.2980814202  | 0.262990814   | -0.3497818399 |
| H | 0.7168689033  | 0.4601831465  | -1.334777908  |
| C | -0.4154595073 | 1.4125535687  | 0.3245784965  |
| C | -3.6716279347 | -0.5363538652 | -0.1743952373 |
| H | -2.2847282829 | -2.1025673819 | 1.5569188422  |
| C | -4.6738102733 | -1.7141151185 | -0.2489749362 |
| C | -4.0364267359 | 0.4756354964  | -1.2753218927 |
| C | -3.8376984694 | 0.1708817151  | 1.1901731398  |
| H | -3.1888875659 | 1.0479257193  | 1.2612202369  |
| H | -3.6053783719 | -0.4892702174 | 2.03011187    |
| H | -4.8728797507 | 0.5083358826  | 1.314857615   |
| H | -5.0549034814 | 0.8451118395  | -1.1169260943 |
| H | -3.9984721864 | 0.0227309898  | -2.2710161067 |
| H | -3.3657745098 | 1.3412340494  | -1.2667177448 |
| H | -5.7025761122 | -1.3522096041 | -0.1370416487 |
| H | -4.486044444  | -2.4480931074 | 0.5405657747  |
| H | -4.5946106845 | -2.2312467492 | -1.2106879893 |
| H | -1.0359865828 | 1.0013735001  | 1.1288342339  |
| H | -1.0983445213 | 1.9068437586  | -0.3773690696 |
| C | 0.5428189666  | 2.462201542   | 0.9227730064  |
| H | -0.0436961883 | 3.1996104598  | 1.4888338232  |
| C | 1.3944313241  | 3.1959248086  | -0.1194530797 |
| H | 1.2050336527  | 1.9692533202  | 1.6473348709  |
| H | 0.7318454264  | 3.6808071748  | -0.8499676158 |
| H | 1.9885766832  | 2.4663899901  | -0.6839823259 |
| C | 2.3285309104  | 4.2369397579  | 0.5033414395  |
| H | 3.0233549622  | 3.7666978124  | 1.2087046077  |
| H | 1.7626025456  | 4.9961009622  | 1.0555294002  |
| H | 2.9239026612  | 4.7522359634  | -0.2575983847 |

|   |              |               |               |
|---|--------------|---------------|---------------|
| C | 3.4447465938 | -0.5449203425 | 0.0881443014  |
| H | 2.0525918238 | -1.6600096645 | -1.1339840228 |
| H | 2.3266821919 | -2.3557916901 | 0.457126617   |
| H | 3.3134883594 | 0.3920928238  | -0.4693582096 |
| C | 4.7222144633 | -1.2488602109 | -0.3820085954 |
| H | 3.553007163  | -0.2553895402 | 1.1429212367  |
| C | 5.9731774635 | -0.3795250834 | -0.2252436965 |
| H | 4.6062371311 | -1.5421247741 | -1.4344577327 |
| H | 4.8490523352 | -2.1835235117 | 0.1811542771  |
| H | 6.8727136996 | -0.9011155709 | -0.5681275423 |
| H | 6.128551379  | -0.0991198632 | 0.8228443485  |
| H | 5.8831615482 | 0.5471545958  | -0.803537736  |
| H | 5.8831615482 | 0.5471545958  | -0.803537736  |

TS endo 0018

E(RB3LYP) = -706.414782834 A.U.

First frequency = -525.0055 cm<sup>-1</sup>

|   |               |               |               |
|---|---------------|---------------|---------------|
| H | -1.5658600764 | -0.9711534207 | -2.1551624289 |
| C | -1.330988523  | -1.3549196792 | -1.1690504555 |
| H | -0.6403859143 | -2.1892453249 | -1.1829786099 |
| C | -2.2330552298 | -1.2187518651 | -0.1159811804 |
| C | -1.8079146167 | -1.6414566022 | 1.1621679582  |
| C | -0.5629804432 | -2.2053056619 | 1.3857113511  |
| H | -0.2376708259 | -2.3988668183 | 2.4043938248  |
| H | -0.1188027552 | -2.8614321458 | 0.6463764442  |
| C | 0.9555482947  | -0.7382720617 | 0.6108584577  |
| H | 0.8677320712  | -0.1953026575 | 1.5486698903  |
| C | 2.1440569781  | -1.6750837283 | 0.518995679   |
| C | 0.4149961674  | -0.1257678627 | -0.526589074  |
| H | 0.8775914014  | -0.3692861097 | -1.4819527265 |
| C | -0.2061574913 | 1.2527165127  | -0.446335638  |
| C | -3.5912959039 | -0.499167588  | -0.258008799  |
| H | -2.3906907591 | -1.3364720923 | 2.0282460232  |
| C | -3.857298366  | -0.0253758249 | -1.6982106183 |
| C | -3.6994226294 | 0.7298468464  | 0.6734698446  |
| C | -4.6956773677 | -1.5140316611 | 0.1256231885  |
| H | -5.6877966354 | -1.0579513702 | 0.0282189984  |

|   |               |               |               |
|---|---------------|---------------|---------------|
| H | -4.5823869528 | -1.8572762683 | 1.158278379   |
| H | -4.6573865379 | -2.3942238829 | -0.5243010672 |
| H | -3.5330253687 | 0.4683919611  | 1.7219985125  |
| H | -4.6994101995 | 1.1722699645  | 0.599406974   |
| H | -2.97143928   | 1.4973947655  | 0.3983279954  |
| H | -4.844565273  | 0.4444268155  | -1.7576726279 |
| H | -3.8415827813 | -0.8587244591 | -2.4077073148 |
| H | -3.1203560174 | 0.7157364074  | -2.0248654787 |
| H | -0.7608003145 | 1.336297296   | 0.4962727911  |
| H | -0.9407428655 | 1.3768004294  | -1.2492525447 |
| C | 0.8120432254  | 2.4105283113  | -0.5441401213 |
| H | 1.4420882698  | 2.2585516192  | -1.432332793  |
| C | 1.704814489   | 2.6025578848  | 0.6868782988  |
| H | 0.2613828971  | 3.3442885087  | -0.7248730155 |
| H | 2.2228859068  | 1.666993349   | 0.918710094   |
| H | 1.0707093119  | 2.8226866097  | 1.5566840385  |
| C | 2.737528937   | 3.7173999371  | 0.499096133   |
| H | 2.2544133844  | 4.6751889144  | 0.2736950865  |
| H | 3.4144362279  | 3.4855226065  | -0.3313893706 |
| H | 3.3488089758  | 3.854936342   | 1.3971583502  |
| C | 3.5114251467  | -0.9565199674 | 0.5463770756  |
| H | 2.0696918082  | -2.271545965  | -0.4018864609 |
| H | 2.1226294074  | -2.3904258626 | 1.3499030957  |
| H | 3.5412344543  | -0.2848100991 | 1.4160848009  |
| C | 3.8542833333  | -0.1656002097 | -0.720675028  |
| H | 4.2982274161  | -1.7042840504 | 0.7175511087  |
| C | 5.175707693   | 0.5986553227  | -0.6010231499 |
| H | 3.0486453564  | 0.540379266   | -0.9448697309 |
| H | 3.8986113518  | -0.8576932788 | -1.5729117999 |
| H | 6.0101985853  | -0.0780137027 | -0.3835916495 |
| H | 5.1276196218  | 1.3350820311  | 0.2094999372  |
| H | 5.4139258878  | 1.1365325568  | -1.5245748    |
| H | 5.4139258878  | 1.1365325568  | -1.5245748    |

TS endo 0027

E(RB3LYP) = -706.414214139 A.U.

First frequency = -510.5919  $\text{cm}^{-1}$

|   |               |               |               |
|---|---------------|---------------|---------------|
| H | -1.7273455137 | -0.5127679849 | -2.1182284346 |
| C | -1.4028884054 | -1.0874449083 | -1.2585704261 |
| H | -0.8301568214 | -1.9696438587 | -1.5174640515 |
| C | -2.1084664717 | -1.0426567592 | -0.0600915873 |
| C | -1.5598024851 | -1.7303879743 | 1.0467050127  |
| C | -0.3900919667 | -2.4651925599 | 0.9696725268  |
| H | 0.0499753299  | -2.8702018371 | 1.8768511195  |
| H | -0.1448009516 | -3.0180930953 | 0.0708802452  |
| C | 1.1955837932  | -1.0465194412 | 0.1731597373  |
| H | 1.3291428394  | -0.6920597173 | 1.1916141806  |
| C | 2.1974355445  | -2.0695404649 | -0.3189638074 |
| C | 0.571886283   | -0.1768647593 | -0.7230605162 |
| H | 0.8461489586  | -0.2646987172 | -1.773933466  |
| C | 0.1508980528  | 1.1984640386  | -0.2632632383 |
| C | -3.3656218213 | -0.1698090418 | 0.1422275805  |
| H | -1.9625864208 | -1.5207932306 | 2.0348901897  |
| C | -3.1885910552 | 0.861777802   | 1.2801591959  |
| C | -4.5314986932 | -1.1200217304 | 0.5096127434  |
| C | -3.7575391437 | 0.5998269056  | -1.1320180379 |
| H | -3.9541804825 | -0.0763832239 | -1.9698901468 |
| H | -2.976128362  | 1.3040497526  | -1.436675991  |
| H | -4.6694043371 | 1.1780151223  | -0.9501536657 |
| H | -4.6960411978 | -1.8573091246 | -0.2828051985 |
| H | -5.4598357068 | -0.5542639858 | 0.6508506125  |
| H | -4.3245540869 | -1.6660115042 | 1.4349865234  |
| H | -4.1257512929 | 1.4060899472  | 1.4428644448  |
| H | -2.4149144669 | 1.5932985204  | 1.032699089   |
| H | -2.9152019733 | 0.3900601723  | 2.2278435739  |
| H | -0.3096447396 | 1.1066881453  | 0.7283012035  |
| H | -0.6191126543 | 1.6010714253  | -0.9289847425 |
| C | 1.3279228613  | 2.1873670832  | -0.1757695836 |
| H | 2.1068049956  | 1.7508813302  | 0.462040608   |
| C | 0.9395306435  | 3.5692298806  | 0.3730186564  |
| H | 1.7791122776  | 2.3023552532  | -1.1717094161 |
| H | 1.8504863192  | 4.1694250156  | 0.4934862895  |
| H | 0.5183313244  | 3.4486046354  | 1.3807414809  |
| C | -0.0541807968 | 4.33904395    | -0.5049538612 |
| H | -1.0217378905 | 3.8306132268  | -0.5668108551 |



|   |               |               |               |
|---|---------------|---------------|---------------|
| H | 0.3280859292  | 4.4479631048  | -1.5267929374 |
| H | -0.2369445889 | 5.3431469428  | -0.1085519129 |
| C | 3.5753926488  | -1.4641648544 | -0.6565329788 |
| H | 1.7984371988  | -2.5554737264 | -1.2204655114 |
| H | 2.3312700238  | -2.8641707378 | 0.426355216   |
| H | 4.2074066806  | -2.2426541193 | -1.1066248689 |
| C | 4.3058719778  | -0.8654110431 | 0.5509088632  |
| H | 3.4447564197  | -0.6872475047 | -1.4218630902 |
| C | 5.6773474079  | -0.2896382848 | 0.187915352   |
| H | 4.4204464693  | -1.639014407  | 1.3229848122  |
| H | 3.6872620577  | -0.0774136183 | 0.9979095417  |
| H | 5.5821346427  | 0.5088062118  | -0.5569300885 |
| H | 6.3300734886  | -1.0606126244 | -0.2375645772 |
| H | 6.1832510372  | 0.1300244155  | 1.0636097314  |
| H | 6.1832510372  | 0.1300244155  | 1.0636097314  |

TS endo 0049

E(RB3LYP) = -706.414384248 A.U.

First frequency = -519.3805  $\text{cm}^{-1}$

|   |               |               |               |
|---|---------------|---------------|---------------|
| H | -1.4687785132 | -1.1543804782 | -1.9915624505 |
| C | -1.2397635138 | -1.4281885962 | -0.9681880428 |
| H | -0.6454372617 | -2.3295621811 | -0.8838204656 |
| C | -2.075101684  | -1.0442993798 | 0.077842157   |
| C | -1.6485443255 | -1.3363095923 | 1.3926583361  |
| C | -0.4745783964 | -2.018619719  | 1.6633278481  |
| H | -0.1324755994 | -2.1113395564 | 2.6905878907  |
| H | -0.1446702395 | -2.8188870431 | 1.0114956676  |
| C | 1.1925193373  | -0.8847489672 | 0.6482686062  |
| H | 1.2323584525  | -0.2310041929 | 1.5176139211  |
| C | 2.2413215701  | -1.9764831262 | 0.6164854027  |
| C | 0.6613350892  | -0.3382197921 | -0.5242216991 |
| H | 1.0430494156  | -0.7165180612 | -1.4706186845 |
| C | 0.1785172827  | 1.0930164563  | -0.5168021308 |
| C | -3.3516784102 | -0.2013002288 | -0.1311631932 |
| H | -2.1548676653 | -0.8465419966 | 2.2212169041  |
| C | -3.300774215  | 1.1446487619  | 0.6281537577  |
| C | -4.5431367525 | -1.0306869382 | 0.4072520673  |

|   |               |               |               |
|---|---------------|---------------|---------------|
| C | -3.6146386779 | 0.1071962113  | -1.6161533439 |
| H | -2.8103561198 | 0.7078590386  | -2.0538019385 |
| H | -4.5440354954 | 0.6771821755  | -1.717650959  |
| H | -3.7189289956 | -0.8078676166 | -2.2075681635 |
| H | -4.6172722735 | -1.9891334605 | -0.1166230514 |
| H | -5.485115992  | -0.487989507  | 0.2659800485  |
| H | -4.4323183925 | -1.2423898589 | 1.4749911054  |
| H | -4.2590391694 | 1.6675511471  | 0.5317693974  |
| H | -2.5227165952 | 1.7959748788  | 0.2218201606  |
| H | -3.1055953695 | 1.010911221   | 1.6955734729  |
| H | -0.4077530065 | 1.2419203743  | 0.396079602   |
| H | -0.5014599533 | 1.276990799   | -1.357614481  |
| C | 1.3223573118  | 2.1227289721  | -0.5683972597 |
| H | 1.9972705516  | 1.9538211344  | 0.2817298106  |
| C | 0.8438248313  | 3.5830671481  | -0.5624422009 |
| H | 1.9195629109  | 1.9446404739  | -1.4725816041 |
| H | 0.168803328   | 3.74502319    | -1.4142354808 |
| H | 1.7079697644  | 4.2384667365  | -0.7303023124 |
| C | 0.141547397   | 4.0048115594  | 0.7336962685  |
| H | 0.7885480651  | 3.8338175169  | 1.6021627248  |
| H | -0.7844835268 | 3.4447810299  | 0.8978612093  |
| H | -0.1178321308 | 5.0683383761  | 0.7151932067  |
| C | 3.6898073887  | -1.449141231  | 0.5324870106  |
| H | 2.0502976828  | -2.6405145553 | -0.2389654302 |
| H | 2.1625071     | -2.6020331592 | 1.5141107953  |
| H | 3.8630154553  | -0.7499374786 | 1.3630082294  |
| C | 4.053642599   | -0.7638631862 | -0.788594833  |
| H | 4.3766324744  | -2.2912277994 | 0.6968152404  |
| C | 5.5107803788  | -0.2944699478 | -0.8287556829 |
| H | 3.3894041085  | 0.0911889742  | -0.9514408528 |
| H | 3.8658377014  | -1.4598349515 | -1.6182293419 |
| H | 6.2029252262  | -1.1342557968 | -0.6973620405 |
| H | 5.7128594243  | 0.4264371924  | -0.0280888079 |
| H | 5.7510294099  | 0.1901548498  | -1.7807804655 |
| H | 5.7510294099  | 0.1901548498  | -1.7807804655 |

TS endo 0055

E(RB3LYP) = -706.413920777 A.U.

First frequency =  $-507.4897 \text{ cm}^{-1}$

|   |               |               |               |
|---|---------------|---------------|---------------|
| H | -1.5122907896 | -0.111259101  | -2.1714793067 |
| C | -1.2228202023 | -0.7917350341 | -1.3794378026 |
| H | -0.4162044171 | -1.4603490543 | -1.6532040663 |
| C | -2.1214714396 | -1.1562702388 | -0.3828431566 |
| C | -1.6336270499 | -1.9537742057 | 0.6782580097  |
| C | -0.32718025   | -2.4052364373 | 0.7389990365  |
| H | 0.0238189883  | -2.9121135623 | 1.6337534826  |
| H | 0.2021914353  | -2.6816007229 | -0.1651377681 |
| C | 0.9888132074  | -0.5712051466 | 0.609807943   |
| H | 0.841575042   | -0.418744806  | 1.6770673933  |
| C | 2.2884530446  | -1.239801675  | 0.2197047317  |
| C | 0.3691703243  | 0.3369602796  | -0.2501221401 |
| H | 0.847936808   | 0.5146490621  | -1.2112219774 |
| C | -0.4358533855 | 1.4794649517  | 0.3258947882  |
| C | -3.5675266383 | -0.6197490171 | -0.318904142  |
| H | -2.2474123762 | -2.056974413  | 1.5699406853  |
| C | -4.5152460059 | -1.8402693271 | -0.4149473982 |
| C | -3.8915637985 | 0.333053429   | -1.4836417297 |
| C | -3.8584548515 | 0.1318171546  | 1.0002988188  |
| H | -3.6618602114 | -0.4854724498 | 1.8809644618  |
| H | -4.9121770683 | 0.4306016206  | 1.0379045472  |
| H | -3.2507456296 | 1.0370127423  | 1.0806334346  |
| H | -3.7645374239 | -0.1557885546 | -2.4546542398 |
| H | -3.2579034267 | 1.2259359725  | -1.4639449883 |
| H | -4.9325144255 | 0.6651336058  | -1.4125351263 |
| H | -4.347277332  | -2.3901567721 | -1.3466151361 |
| H | -5.5626973304 | -1.517630957  | -0.3903187123 |
| H | -4.3560351306 | -2.5349417567 | 0.4153598214  |
| H | -1.0902634984 | 1.073884916   | 1.1057840894  |
| H | -1.0912217936 | 1.9127498123  | -0.4396699292 |
| C | 0.434243935   | 2.5961369166  | 0.9371637516  |
| H | -0.2203481726 | 3.3292288939  | 1.4294007978  |
| C | 1.3212222094  | 3.3229632546  | -0.08007216   |
| H | 1.0669804292  | 2.1657144402  | 1.7251452778  |
| H | 0.6892737325  | 3.7391001169  | -0.8771283688 |
| H | 1.9873325383  | 2.5988928707  | -0.5658157671 |

|   |              |               |               |
|---|--------------|---------------|---------------|
| C | 2.1585718094 | 4.4382529724  | 0.5516372364  |
| H | 1.5195431525 | 5.1934724863  | 1.0236569445  |
| H | 2.7819622098 | 4.9459318785  | -0.1917869428 |
| H | 2.8224609198 | 4.038179484   | 1.3266547226  |
| C | 3.5049665999 | -0.3207746181 | 0.4431444934  |
| H | 2.2379958425 | -1.5330534612 | -0.8373358428 |
| H | 2.4368942108 | -2.1657200874 | 0.7909314142  |
| H | 3.3904330278 | 0.5778153776  | -0.1780854986 |
| C | 4.8594836433 | -0.9821653986 | 0.1469360772  |
| H | 3.4926918375 | 0.027258795   | 1.4845642576  |
| C | 5.0558555914 | -1.3697932389 | -1.3232534395 |
| H | 4.9722945758 | -1.873542718  | 0.7793952412  |
| H | 5.6601794677 | -0.2936847097 | 0.4458382365  |
| H | 4.3366382196 | -2.1306449621 | -1.64299378   |
| H | 6.0586637797 | -1.7736384159 | -1.4963073923 |
| H | 4.9290468375 | -0.4991857519 | -1.9775278462 |
| H | 4.9290468375 | -0.4991857519 | -1.9775278462 |

TS endo 0057

E(RB3LYP) = -706.414830615 A.U.

First frequency = -509.2439  $\text{cm}^{-1}$

|   |               |               |               |
|---|---------------|---------------|---------------|
| H | -1.7247971285 | 0.3829739775  | -2.0094394648 |
| C | -1.4179956232 | -0.4854585989 | -1.4382816364 |
| H | -0.7629524379 | -1.1540823479 | -1.9836159914 |
| C | -2.2074709717 | -0.9753444467 | -0.4023907324 |
| C | -1.6869125614 | -2.0400570764 | 0.368907535   |
| C | -0.467488313  | -2.6369176789 | 0.1015594941  |
| H | -0.0639174461 | -3.3669658042 | 0.797831674   |
| H | -0.1286556825 | -2.7609332929 | -0.9197646316 |
| C | 1.0758917796  | -0.9660118522 | 0.0877649775  |
| H | 1.1412348388  | -1.0803467936 | 1.1661626614  |
| C | 2.1505613245  | -1.6547235776 | -0.7283207994 |
| C | 0.4453465503  | 0.1830789556  | -0.3911441187 |
| H | 0.7789342768  | 0.5689301391  | -1.3528257219 |
| C | -0.1038391839 | 1.1955922219  | 0.5868770503  |
| C | -3.5434009267 | -0.3236146289 | 0.0144019254  |
| H | -2.1708483193 | -2.2765064412 | 1.3135967004  |

|   |               |               |               |
|---|---------------|---------------|---------------|
| C | -4.6529307495 | -1.3845323527 | -0.1873849713 |
| C | -3.890203616  | 0.9048439999  | -0.8459956988 |
| C | -3.5474374182 | 0.121919957   | 1.4947153461  |
| H | -3.3176746499 | -0.7013929675 | 2.1763338129  |
| H | -4.5365123639 | 0.5067411622  | 1.7678362718  |
| H | -2.8187892691 | 0.9179142045  | 1.6694090695  |
| H | -4.8545481804 | 1.3173514532  | -0.5317765115 |
| H | -3.9690740184 | 0.6479410051  | -1.9069905412 |
| H | -3.1415251874 | 1.6969381127  | -0.7398984345 |
| H | -5.6335308541 | -0.9720905202 | 0.077553348   |
| H | -4.4775607311 | -2.267063226  | 0.4353324568  |
| H | -4.6897893372 | -1.7145703419 | -1.2306004959 |
| H | -0.6978238146 | 0.6589842343  | 1.335256339   |
| H | -0.7927274219 | 1.8791119603  | 0.0785369445  |
| C | 0.9854873815  | 2.0065453331  | 1.3213975998  |
| H | 0.4925002324  | 2.7205406069  | 1.9962291255  |
| C | 1.956728201   | 2.767264272   | 0.4058059193  |
| H | 1.5619212006  | 1.3245485999  | 1.9592476526  |
| H | 2.5299752155  | 2.0463195931  | -0.189826429  |
| H | 2.6889032125  | 3.293353901   | 1.0314419961  |
| C | 1.2743353009  | 3.7713310299  | -0.5291000789 |
| H | 2.0104156413  | 4.3383859945  | -1.1081544328 |
| H | 0.6689165158  | 4.489275424   | 0.0366202038  |
| H | 0.6102175012  | 3.2712044242  | -1.2420599724 |
| C | 3.4720990274  | -0.863582421  | -0.8081415029 |
| H | 1.781756309   | -1.8116024197 | -1.7520747668 |
| H | 2.3526115453  | -2.6522584155 | -0.3179778359 |
| H | 4.1762361927  | -1.4078341549 | -1.4530781215 |
| C | 4.1319736823  | -0.6039435614 | 0.5503304008  |
| H | 3.2807905471  | 0.0972384192  | -1.3045551801 |
| C | 5.4305652057  | 0.1983532033  | 0.4328013567  |
| H | 4.3296161927  | -1.5643844459 | 1.0462789618  |
| H | 3.4296828256  | -0.0639438811 | 1.1966271468  |
| H | 6.1631942647  | -0.3214008225 | -0.1953637055 |
| H | 5.8901056797  | 0.3673288566  | 1.4121176078  |
| H | 5.243129366   | 1.1785413747  | -0.0207503499 |
| H | 5.243129366   | 1.1785413747  | -0.0207503499 |

TS endo 0058

E(RB3LYP) = -706.413684228 A.U.

First frequency = -508.9713  $\text{cm}^{-1}$

|   |               |               |               |
|---|---------------|---------------|---------------|
| H | -1.4033001789 | -0.9052528422 | -2.0655869231 |
| C | -1.1096038602 | -1.227461544  | -1.0734536499 |
| H | -0.3933257001 | -2.0397246174 | -1.0744831683 |
| C | -1.9509792124 | -1.0420920991 | 0.0185221808  |
| C | -1.449525994  | -1.3833336324 | 1.2958944641  |
| C | -0.1895683654 | -1.9214265362 | 1.4884257824  |
| H | 0.1897073172  | -2.0514726164 | 2.4983481443  |
| H | 0.2331788826  | -2.6064181533 | 0.7630740367  |
| C | 1.2721507959  | -0.4730855632 | 0.5445283583  |
| H | 1.2367192978  | 0.11427865    | 1.4596933996  |
| C | 2.4639409437  | -1.3933455299 | 0.4027117987  |
| C | 0.6577538293  | 0.074729881   | -0.5827225314 |
| H | 1.0701747524  | -0.1951171049 | -1.5544518745 |
| C | 0.0068514793  | 1.4335830485  | -0.4908287938 |
| C | -3.3298901997 | -0.3564662432 | -0.0900765932 |
| H | -1.9914480203 | -1.0351480185 | 2.1721791668  |
| C | -3.4218134384 | 0.9187104516  | 0.7794911911  |
| C | -4.3902771817 | -1.3716978479 | 0.4016646715  |
| C | -3.6770380859 | 0.0364698585  | -1.5372977691 |
| H | -4.6734587596 | 0.4892846882  | -1.5699993146 |
| H | -3.684410884  | -0.8328498807 | -2.2023156377 |
| H | -2.9688030479 | 0.7688836349  | -1.9387476544 |
| H | -4.3618916407 | -2.285254178  | -0.200990833  |
| H | -5.3966007423 | -0.9429970159 | 0.3287593457  |
| H | -4.2190145945 | -1.6551245098 | 1.4444867281  |
| H | -2.7406008985 | 1.6921234908  | 0.4151520453  |
| H | -3.1807973383 | 0.7235511672  | 1.8278741974  |
| H | -4.4389922115 | 1.3251497781  | 0.74562028    |
| H | -0.5751923395 | 1.4677223118  | 0.4360770472  |
| H | -0.7047283945 | 1.5809290826  | -1.3127809407 |
| C | 1.0308604863  | 2.5839044646  | -0.5024730839 |
| H | 1.7148997991  | 2.4617320014  | 0.3482542504  |
| C | 0.3964867524  | 3.9825764343  | -0.4578251709 |
| H | 1.6507215671  | 2.4968456495  | -1.4049371705 |

|   |               |               |               |
|---|---------------|---------------|---------------|
| H | -0.2774557949 | 4.1008743781  | -1.3176309832 |
| H | 1.1868147677  | 4.7333946695  | -0.5852113914 |
| C | -0.3705286552 | 4.2787492112  | 0.8363451375  |
| H | 0.2746798384  | 4.1450514744  | 1.7126738879  |
| H | -1.233968345  | 3.6172116854  | 0.9596618032  |
| H | -0.7423357719 | 5.3084783023  | 0.8497750652  |
| C | 3.7732481632  | -0.6167647873 | 0.1646598025  |
| H | 2.2870884267  | -2.082046629  | -0.4342032622 |
| H | 2.5820605624  | -2.0183072904 | 1.2977570008  |
| H | 3.6762464797  | -0.0330763179 | -0.7607267982 |
| C | 5.0273149888  | -1.5009795097 | 0.089466319   |
| H | 3.8958991294  | 0.1157020097  | 0.9735721493  |
| C | 5.0425761863  | -2.4622849101 | -1.1046928405 |
| H | 5.1219975599  | -2.0738120886 | 1.0223182586  |
| H | 5.9120281736  | -0.853485855  | 0.0390814257  |
| H | 4.2301455886  | -3.1938727049 | -1.0486336968 |
| H | 5.9832514729  | -3.0204682345 | -1.1523317585 |
| H | 4.9306412572  | -1.9155262464 | -2.0484105579 |
| H | 4.9306412572  | -1.9155262464 | -2.0484105579 |

TS endo 0061

E(RB3LYP) = -706.414772832 A.U.

First frequency = -509.0443  $\text{cm}^{-1}$

|   |               |               |               |
|---|---------------|---------------|---------------|
| H | -1.9757797208 | -0.2779058187 | -2.0716427906 |
| C | -1.5138351825 | -0.9235216866 | -1.3340088133 |
| H | -0.8131979346 | -1.6335279835 | -1.7560681507 |
| C | -2.1506195989 | -1.2046591613 | -0.1294531392 |
| C | -1.434860334  | -1.9598338245 | 0.8281874064  |
| C | -0.1675916288 | -2.4642104202 | 0.593691037   |
| H | 0.3811358755  | -2.9332873953 | 1.4058902247  |
| H | 0.1081888499  | -2.8182533068 | -0.3922845948 |
| C | 1.1293763626  | -0.702059625  | 0.0018987432  |
| H | 1.2851531466  | -0.513803129  | 1.0609304273  |
| C | 2.2307446496  | -1.4581058616 | -0.7106530987 |
| C | 0.3233495458  | 0.202094209   | -0.6911605866 |
| H | 0.5337651842  | 0.3447765864  | -1.7491786633 |
| C | -0.2891054469 | 1.3734286419  | 0.0429094014  |

|   |               |               |               |
|---|---------------|---------------|---------------|
| C | -3.5302833166 | -0.6220782148 | 0.2455828936  |
| H | -1.811824228  | -1.9895324367 | 1.8477128632  |
| C | -3.4942759209 | 0.1866673833  | 1.5625667564  |
| C | -4.4972626138 | -1.8180040358 | 0.4250151426  |
| C | -4.0972699413 | 0.2956244195  | -0.8525217491 |
| H | -4.2162408735 | -0.2341722729 | -1.8027998062 |
| H | -3.4543726381 | 1.1655837889  | -1.0230382472 |
| H | -5.0833183883 | 0.6661162126  | -0.5536962009 |
| H | -4.5604241286 | -2.4079677526 | -0.495064878  |
| H | -5.5042400634 | -1.465413367  | 0.6771847574  |
| H | -4.1613535509 | -2.4841173238 | 1.2256149983  |
| H | -3.1114382439 | -0.4014974088 | 2.4008243175  |
| H | -4.5054411593 | 0.5150698159  | 1.8282807845  |
| H | -2.8690623863 | 1.0779043304  | 1.4622562885  |
| H | -0.7933853073 | 0.9871372502  | 0.9357957092  |
| H | -1.0623952122 | 1.8454115176  | -0.5757009521 |
| C | 0.7349841737  | 2.4396172567  | 0.4809750641  |
| H | 0.2121454997  | 3.2250705782  | 1.0447262583  |
| C | 1.5092641751  | 3.0809425181  | -0.6754121056 |
| H | 1.4472842135  | 1.9835002685  | 1.1815312943  |
| H | 0.7985323473  | 3.5435776889  | -1.3742941636 |
| H | 2.0287146872  | 2.2977601478  | -1.2411101932 |
| C | 2.5266822107  | 4.1222922147  | -0.2019486695 |
| H | 3.2698871572  | 3.6665313418  | 0.4625944747  |
| H | 2.0378224387  | 4.9300965976  | 0.3547839805  |
| H | 3.0640961289  | 4.573341441   | -1.042570107  |
| C | 3.4543822473  | -0.5850820427 | -1.0657525157 |
| H | 1.8334653317  | -1.8820807581 | -1.6436779617 |
| H | 2.5550683064  | -2.3116927274 | -0.1043674603 |
| H | 4.2054070519  | -1.2196510818 | -1.5570354293 |
| C | 4.1049247381  | 0.135585001   | 0.124986735   |
| H | 3.1469445595  | 0.1638075129  | -1.806672165  |
| C | 4.5909084671  | -0.8041287569 | 1.2333315251  |
| H | 3.3918222166  | 0.8555030251  | 0.5440504641  |
| H | 4.9508796491  | 0.7278753055  | -0.2460735016 |
| H | 5.1122700618  | -0.2512198865 | 2.0213968561  |
| H | 5.2836766876  | -1.5565404731 | 0.8384174014  |
| H | 3.7579339263  | -1.3378343307 | 1.7031624893  |



H 3.7579339263 -1.3378343307 1.7031624893

TS endo 0064

E(RB3LYP) = -706.413158809 A.U.

First frequency = -511.5058 cm<sup>-1</sup>

H -1.4865404297 -0.3640040983 -2.1739731584  
C -1.1655666332 -0.9262560941 -1.3048475943  
H -0.4636815133 -1.718335389 -1.5349105818  
C -1.9696430264 -1.0152705456 -0.1729268253  
C -1.4326879732 -1.6689900012 0.9598736117  
C -0.1750251749 -2.2457432132 0.9674673522  
H 0.2349147127 -2.6266248236 1.898936327  
H 0.2139678326 -2.7296233201 0.0794928322  
C 1.2782214719 -0.6156131102 0.3578190356  
H 1.2868701473 -0.2806059336 1.3928519698  
C 2.4465796859 -1.4808722814 -0.0596317844  
C 0.6280758189 0.2028154921 -0.567192491  
H 0.9992054375 0.189095797 -1.5914709854  
C -0.0051805326 1.4944518598 -0.1084191985  
C -3.3411718646 -0.3155351202 -0.0596970121  
H -1.941271449 -1.5489433147 1.9136051753  
C -3.7222902607 0.4406076532 -1.3452057511  
C -3.3930076642 0.6914981804 1.1122868995  
C -4.4014764961 -1.4170810541 0.184097416  
H -4.2040630347 -1.9628113767 1.1117069492  
H -4.4031253326 -2.14278599 -0.6356250079  
H -5.4034060035 -0.9780762452 0.2565603006  
H -3.137589027 0.2271755131 2.0686058828  
H -4.4032969521 1.1053655228 1.2076761484  
H -2.7040694484 1.5240746383 0.9476310947  
H -3.7599005896 -0.2266802919 -2.2119721481  
H -3.0156291497 1.2478051688 -1.5651127054  
H -4.7129598014 0.8924491368 -1.2298134084  
H -0.5363448472 1.3039866281 0.832543822  
H -0.7585083874 1.8248899407 -0.8305673578  
C 1.0232396507 2.6176461461 0.1190157556  
H 1.7980789144 2.2501999521 0.8035376718

|   |               |               |               |
|---|---------------|---------------|---------------|
| C | 0.4159982131  | 3.91067612    | 0.6853414274  |
| H | 1.5340518362  | 2.8378717832  | -0.8293389467 |
| H | 1.2283396797  | 4.6155247333  | 0.9042404758  |
| H | -0.0632351266 | 3.6888225415  | 1.6489826019  |
| C | -0.598535152  | 4.5892617764  | -0.2427185356 |
| H | -0.9413112983 | 5.5417375926  | 0.174503728   |
| H | -1.4835199325 | 3.9652895875  | -0.4040640172 |
| H | -0.15561041   | 4.7948877235  | -1.2244175225 |
| C | 3.7571101113  | -0.6786722673 | -0.1738342393 |
| H | 2.2300380128  | -1.943916214  | -1.0338787817 |
| H | 2.5814147451  | -2.3046735551 | 0.6503278723  |
| H | 3.5946883498  | 0.15119008    | -0.8729054988 |
| C | 4.966995868   | -1.5059035775 | -0.6352822115 |
| H | 3.9800062258  | -0.2174308146 | 0.7988277533  |
| C | 5.4008535817  | -2.5926393765 | 0.3552959904  |
| H | 5.8103496413  | -0.8259027052 | -0.8110682216 |
| H | 4.7391981849  | -1.9655089565 | -1.6070779409 |
| H | 6.3037419314  | -3.1062318722 | 0.0091615624  |
| H | 4.624739375   | -3.3521980363 | 0.4930961986  |
| H | 5.6190790222  | -2.1606051946 | 1.3390154393  |
| H | 5.6190790222  | -2.1606051946 | 1.3390154393  |

TS endo 0072

E(RB3LYP) = -706.414485071 A.U.

First frequency = -527.4199  $\text{cm}^{-1}$

|   |               |               |               |
|---|---------------|---------------|---------------|
| H | -1.4037021346 | -0.4478734073 | -2.1129606723 |
| C | -1.1828930969 | -1.0575431145 | -1.244375046  |
| H | -0.4705045155 | -1.848819374  | -1.4420118285 |
| C | -2.1143689491 | -1.2005636667 | -0.2175766922 |
| C | -1.7087352283 | -1.9111548158 | 0.9331465039  |
| C | -0.4578761259 | -2.4954119362 | 1.0447965222  |
| H | -0.1486256419 | -2.9263366924 | 1.9933071638  |
| H | 0.0098716217  | -2.9478395746 | 0.178552567   |
| C | 1.0693583558  | -0.8810008089 | 0.6779843048  |
| H | 0.9834668453  | -0.6049558685 | 1.7275795922  |
| C | 2.2663867013  | -1.7459050467 | 0.335251158   |
| C | 0.5077981781  | 0.0018043326  | -0.2525885143 |

|   |               |               |               |
|---|---------------|---------------|---------------|
| H | 0.9746624928  | 0.0549609265  | -1.2331827579 |
| C | -0.1844599581 | 1.2563352338  | 0.2354038827  |
| C | -3.4926825752 | -0.5054622041 | -0.2298339621 |
| H | -2.3187723643 | -1.8362455452 | 1.8302287107  |
| C | -3.7218512476 | 0.3226760841  | -1.5070734251 |
| C | -3.6915243681 | 0.431602537   | 0.9834845447  |
| C | -4.5672986289 | -1.6190963535 | -0.1782495873 |
| H | -4.466061829  | -2.2967001158 | -1.0321828961 |
| H | -5.5735672662 | -1.1846525691 | -0.201612738  |
| H | -4.4782350144 | -2.2168896559 | 0.7338774798  |
| H | -3.5542318211 | -0.0890669696 | 1.93501614    |
| H | -4.7074352047 | 0.842595788   | 0.9781347835  |
| H | -2.9906684294 | 1.2698106575  | 0.953854732   |
| H | -4.7212918067 | 0.7693482745  | -1.4848295298 |
| H | -3.653788241  | -0.2949520647 | -2.4081208007 |
| H | -2.997776176  | 1.1392842891  | -1.5965245841 |
| H | -0.8021118025 | 0.9842012416  | 1.0987683005  |
| H | -0.8704310452 | 1.6378889755  | -0.5303938064 |
| C | 0.7818612761  | 2.3857264276  | 0.642915977   |
| H | 0.2127033226  | 3.1826548405  | 1.1416194097  |
| C | 1.5531305122  | 2.9929831269  | -0.5357317954 |
| H | 1.4895430139  | 2.0017736249  | 1.3898509244  |
| H | 0.8362869896  | 3.4417118286  | -1.2369915075 |
| H | 2.0640618818  | 2.1986586953  | -1.09282637   |
| C | 2.5791467689  | 4.0413044091  | -0.0981967619 |
| H | 3.1005646584  | 4.4786341038  | -0.9559570472 |
| H | 3.334431261   | 3.595926854   | 0.559672801   |
| H | 2.1006793227  | 4.8579113486  | 0.4546724557  |
| C | 3.6193594614  | -1.1495232905 | 0.7836241279  |
| H | 2.279363561   | -1.9340972956 | -0.7463448537 |
| H | 2.1791912393  | -2.7311007442 | 0.8102581251  |
| H | 3.5972616252  | -1.0326788887 | 1.8756176809  |
| C | 4.0095127684  | 0.1937157339  | 0.1516563083  |
| H | 4.4061423815  | -1.8870057005 | 0.5714614428  |
| C | 4.1871661547  | 0.1469714173  | -1.3688932283 |
| H | 4.9469035009  | 0.5330936554  | 0.6106879826  |
| H | 3.2557470931  | 0.9446399527  | 0.4071596077  |
| H | 4.5193193129  | 1.1155374382  | -1.7567876669 |

|   |              |               |               |
|---|--------------|---------------|---------------|
| H | 3.2522695655 | -0.1060185937 | -1.8789095629 |
| H | 4.9328936476 | -0.6031584264 | -1.6572995396 |
| H | 4.9328936476 | -0.6031584264 | -1.6572995396 |

TS endo 0073

E(RB3LYP) = -706.414115377 A.U.

First frequency = -530.9569 cm<sup>-1</sup>

|   |               |               |               |
|---|---------------|---------------|---------------|
| H | -1.8870126828 | -0.5700348004 | -2.2566548843 |
| C | -1.5060869251 | -1.0782887885 | -1.378245774  |
| H | -0.8401239172 | -1.9008426989 | -1.6099289919 |
| C | -2.2313744722 | -1.0863058664 | -0.1880182707 |
| C | -1.6196854334 | -1.6711991003 | 0.9415730996  |
| C | -0.3663710243 | -2.257610886  | 0.8910744002  |
| H | 0.1123983237  | -2.5804864    | 1.8117076443  |
| H | -0.0590429967 | -2.8132123065 | 0.0130890836  |
| C | 1.0359231848  | -0.7002307403 | 0.0649481956  |
| H | 1.1271357157  | -0.3029001336 | 1.0711937186  |
| C | 2.1408768862  | -1.6334620526 | -0.3916977623 |
| C | 0.3303649267  | 0.0722041773  | -0.8658027347 |
| H | 0.6304640337  | -0.0255937818 | -1.9096807459 |
| C | -0.2465416233 | 1.4213496238  | -0.4899971998 |
| C | -3.5818291321 | -0.3584013031 | -0.0184445637 |
| H | -2.0541602839 | -1.4827232021 | 1.9205777039  |
| C | -4.6303983971 | -1.4167129843 | 0.4026171074  |
| C | -4.064703577  | 0.2972048723  | -1.3248113737 |
| C | -3.5171362784 | 0.7383010562  | 1.0694759637  |
| H | -2.8185196491 | 1.5307607095  | 0.7894346329  |
| H | -3.2020799963 | 0.3395100797  | 2.0375904852  |
| H | -4.5052711492 | 1.1920954799  | 1.2067241484  |
| H | -4.1738601728 | -0.4371491071 | -2.129142632  |
| H | -3.3784352555 | 1.0788012445  | -1.6670742136 |
| H | -5.0417487435 | 0.7651255566  | -1.1656306255 |
| H | -4.3606489895 | -1.8921914499 | 1.3503222803  |
| H | -4.7133348852 | -2.2040579558 | -0.3535871016 |
| H | -5.6163379238 | -0.9535278289 | 0.5258502917  |
| H | -0.5281348226 | 1.404056853   | 0.5687947688  |
| H | -1.1724842911 | 1.6030129646  | -1.0455197418 |

|   |              |               |               |
|---|--------------|---------------|---------------|
| C | 0.6949908091 | 2.6136022001  | -0.770933106  |
| H | 0.9237340671 | 2.6267737926  | -1.8454109988 |
| C | 2.0134014334 | 2.6420449472  | 0.0145014707  |
| H | 0.1395256265 | 3.5399667873  | -0.567067012  |
| H | 2.6058518364 | 3.4977447667  | -0.3341146125 |
| H | 2.5972233904 | 1.7490886933  | -0.2274341287 |
| C | 1.8396288126 | 2.7418148735  | 1.5329743282  |
| H | 1.2537418419 | 3.6272522953  | 1.8063247055  |
| H | 2.809099398  | 2.8133751808  | 2.0370137383  |
| H | 1.3221659371 | 1.8677244593  | 1.9406566395  |
| C | 3.4946363423 | -0.9329110962 | -0.6237236453 |
| H | 1.8274478181 | -2.1176484673 | -1.3270259336 |
| H | 2.2893582656 | -2.4407177259 | 0.3372362509  |
| H | 4.1831324706 | -1.6343167207 | -1.1152349705 |
| C | 4.151596672  | -0.418456241  | 0.663573534   |
| H | 3.3517951603 | -0.1005408801 | -1.3256674531 |
| C | 5.4382660513 | 0.3676119532  | 0.3992400274  |
| H | 4.3637967894 | -1.2727200059 | 1.3208462273  |
| H | 3.4468211038 | 0.217526621   | 1.2121531925  |
| H | 5.9040792677 | 0.7039686938  | 1.3312478636  |
| H | 5.2336170287 | 1.2550734575  | -0.2107130089 |
| H | 6.1718862888 | -0.2419755823 | -0.140799956  |
| H | 6.1718862888 | -0.2419755823 | -0.140799956  |

TS endo 0081

E(RB3LYP) = -706.414094593 A.U.

First frequency = -525.9540 cm<sup>-1</sup>

|   |               |               |               |
|---|---------------|---------------|---------------|
| H | -1.4877343547 | -1.2071834001 | -2.0776640139 |
| C | -1.2642684216 | -1.4264706852 | -1.0399532615 |
| H | -0.6038671539 | -2.2751049367 | -0.9100037111 |
| C | -2.1576465393 | -1.0798809679 | -0.0282972984 |
| C | -1.7441655678 | -1.2932509725 | 1.3045039769  |
| C | -0.5223305877 | -1.862063265  | 1.6246148557  |
| H | -0.2011497547 | -1.8920730327 | 2.662423604   |
| H | -0.1126111128 | -2.655880002  | 1.011105166   |
| C | 1.0563636998  | -0.6239462964 | 0.614163262   |
| H | 1.0109133764  | 0.0589689615  | 1.4583374192  |

|   |               |               |               |
|---|---------------|---------------|---------------|
| C | 2.192614874   | -1.626072231  | 0.6574295575  |
| C | 0.5265994783  | -0.1698981711 | -0.6002083471 |
| H | 0.970248348   | -0.5689084985 | -1.5109619424 |
| C | -0.0638114938 | 1.217958938   | -0.7154984153 |
| C | -3.4923621119 | -0.3518486551 | -0.2960432399 |
| H | -2.3114695448 | -0.8225818837 | 2.1040679815  |
| C | -3.7381006756 | -0.108405189  | -1.7959331928 |
| C | -3.5704615754 | 1.013660926   | 0.4245776016  |
| C | -4.6272863658 | -1.2606184757 | 0.2362711547  |
| H | -4.5278596484 | -1.4349895193 | 1.3118472988  |
| H | -4.6108254892 | -2.2351756605 | -0.2623006548 |
| H | -5.6056775398 | -0.7995577691 | 0.0573456578  |
| H | -3.4124738548 | 0.921542215   | 1.5025230198  |
| H | -4.5590787045 | 1.4622870554  | 0.2746610184  |
| H | -2.8238993897 | 1.7095687363  | 0.0332343647  |
| H | -2.9752706961 | 0.5454859637  | -2.2312697355 |
| H | -4.7087674586 | 0.3777967942  | -1.9385703169 |
| H | -3.7488062956 | -1.0452784452 | -2.3617912403 |
| H | -0.6611553583 | 1.417898664   | 0.1803189747  |
| H | -0.7613318943 | 1.2539813856  | -1.5594579957 |
| C | 0.9741838926  | 2.3463401781  | -0.9148229946 |
| H | 1.5918952378  | 2.1037384842  | -1.7900788031 |
| C | 1.8918333044  | 2.6481400191  | 0.2801947372  |
| H | 0.4294386747  | 3.2652544793  | -1.1741554592 |
| H | 2.6171671289  | 3.412251467   | -0.0274637673 |
| H | 2.478046129   | 1.7581457618  | 0.5314774984  |
| C | 1.1488398761  | 3.1383006972  | 1.5277335219  |
| H | 0.5423135303  | 4.0234998276  | 1.3028692098  |
| H | 1.8494718714  | 3.4072053275  | 2.3249880619  |
| H | 0.4751181883  | 2.373673256   | 1.9279639067  |
| C | 3.5969185548  | -0.9938762164 | 0.5430247412  |
| H | 2.0631592225  | -2.359687079  | -0.1516447554 |
| H | 2.1540106     | -2.194044399  | 1.5947598323  |
| H | 3.6922131005  | -0.1999360599 | 1.2974242365  |
| C | 3.943599837   | -0.4285927369 | -0.8384413542 |
| H | 4.3451454801  | -1.7533472658 | 0.8094888563  |
| C | 5.3312101586  | 0.217469078   | -0.8798512467 |
| H | 3.1910825209  | 0.3091565733  | -1.1352453635 |

|   |              |               |               |
|---|--------------|---------------|---------------|
| H | 3.8868080138 | -1.2373441455 | -1.5801781068 |
| H | 5.3913875049 | 1.0576461777  | -0.1783807059 |
| H | 5.5670893307 | 0.6002442874  | -1.8781645279 |
| H | 6.1127980688 | -0.4995538885 | -0.6032741299 |
| H | 6.1127980688 | -0.4995538885 | -0.6032741299 |

TS endo 0082

E(RB3LYP) = -706.414393894 A.U.

First frequency = -519.4031  $\text{cm}^{-1}$

|   |               |               |               |
|---|---------------|---------------|---------------|
| H | -1.2254682803 | -1.0836994103 | -2.0378140758 |
| C | -1.0522088726 | -1.4176141032 | -1.021351339  |
| H | -0.3845615915 | -2.2676097482 | -0.9529237516 |
| C | -1.9987126975 | -1.1937468641 | -0.0244924529 |
| C | -1.6500752371 | -1.5527067422 | 1.2966863672  |
| C | -0.4421348046 | -2.1499357907 | 1.614918728   |
| H | -0.1735198335 | -2.2947250151 | 2.6578872319  |
| H | 0.009754015   | -2.8641903806 | 0.9368999383  |
| C | 1.1872118026  | -0.7997754034 | 0.8272055411  |
| H | 1.1044674778  | -0.2174430904 | 1.7431256584  |
| C | 2.3253923344  | -1.7976269409 | 0.7978868555  |
| C | 0.6978495478  | -0.2057035056 | -0.3405018972 |
| H | 1.1797634866  | -0.4712371469 | -1.2792042384 |
| C | 0.0873078145  | 1.1741494017  | -0.2697211397 |
| C | -3.3288543613 | -0.4524230496 | -0.279335559  |
| H | -2.2627702469 | -1.1776341197 | 2.1131064178  |
| C | -3.4739755948 | 0.8158731732  | 0.5927482752  |
| C | -4.474671009  | -1.4318638473 | 0.0743796282  |
| C | -3.494028337  | -0.0325506935 | -1.7509989192 |
| H | -2.7166289257 | 0.673890582   | -2.060311876  |
| H | -4.4617490411 | 0.4606415614  | -1.8895628955 |
| H | -3.4606890334 | -0.8946295873 | -2.4245662257 |
| H | -5.4500205336 | -0.9644001409 | -0.1045816987 |
| H | -4.4318162323 | -1.7325451909 | 1.1255659083  |
| H | -4.4120272349 | -2.3393880968 | -0.5347818295 |
| H | -2.7222448307 | 1.5644355815  | 0.3295635224  |
| H | -3.3737866491 | 0.598034701   | 1.6594718466  |
| H | -4.4621900348 | 1.2647388521  | 0.4410500277  |

|   |               |               |               |
|---|---------------|---------------|---------------|
| H | -0.5812047163 | 1.2080457117  | 0.5993190475  |
| H | -0.5383053276 | 1.3640366397  | -1.1501121029 |
| C | 1.1255927481  | 2.3020423167  | -0.1418973932 |
| H | 1.7546442282  | 2.1170188091  | 0.7391111363  |
| C | 0.4869208374  | 3.6913523742  | -0.0349794785 |
| H | 1.8012187125  | 2.2778906279  | -1.0085903406 |
| H | -0.1892186943 | 3.7102087517  | 0.8308348577  |
| H | -0.1447240803 | 3.8678837806  | -0.9163896302 |
| C | 1.5185869842  | 4.8156925791  | 0.0924334743  |
| H | 2.1865103453  | 4.837125591   | -0.7763214775 |
| H | 2.142199512   | 4.6780433081  | 0.983172446   |
| H | 1.0389849962  | 5.7970083046  | 0.1689968751  |
| C | 3.7266622918  | -1.1486293396 | 0.8610332703  |
| H | 2.2433185574  | -2.4177783223 | -0.1046457219 |
| H | 2.243840098   | -2.4880567788 | 1.6462887335  |
| H | 3.7814683235  | -0.5354285199 | 1.7705860703  |
| C | 4.1237579919  | -0.2865762604 | -0.3464611526 |
| H | 4.4707048438  | -1.9479885349 | 0.9857071493  |
| C | 4.2278190035  | -1.0646747652 | -1.6625098782 |
| H | 5.092530751   | 0.182426799   | -0.1319738588 |
| H | 3.4067065112  | 0.5334393796  | -0.4608137685 |
| H | 4.576289666   | -0.4203577639 | -2.4762854275 |
| H | 3.262553009   | -1.4821826496 | -1.9671086705 |
| H | 4.9322869332  | -1.8999679865 | -1.5724390074 |
| H | 4.9322869332  | -1.8999679865 | -1.5724390074 |

TS endo 0084

E(RB3LYP) = -706.414073801 A.U.

First frequency = -513.3395  $\text{cm}^{-1}$

|   |               |               |               |
|---|---------------|---------------|---------------|
| H | -1.798754678  | -0.6424369127 | -2.1897063061 |
| C | -1.3789791966 | -1.1370817692 | -1.3215815692 |
| H | -0.7671101338 | -1.9968118532 | -1.5658164109 |
| C | -2.004075258  | -1.057095194  | -0.0807562865 |
| C | -1.3365606207 | -1.6316886476 | 1.0250383614  |
| C | -0.1294243948 | -2.2980502847 | 0.9092200601  |
| H | 0.3981141183  | -2.6126161642 | 1.8056566885  |
| H | 0.0849804481  | -2.8983765645 | 0.0332163435  |



|   |               |               |               |
|---|---------------|---------------|---------------|
| C | 1.3041247829  | -0.8538629122 | -0.0888782902 |
| H | 1.4936373068  | -0.4282572557 | 0.8931796969  |
| C | 2.323517335   | -1.8523098949 | -0.5934624628 |
| C | 0.5664657225  | -0.0767337053 | -0.984237857  |
| H | 0.7724564376  | -0.2110674323 | -2.0457103323 |
| C | 0.0893339233  | 1.294145408   | -0.5691371683 |
| C | -3.3019650991 | -0.2553949696 | 0.1564503938  |
| H | -1.6831645563 | -1.3794532805 | 2.0245731127  |
| C | -3.8404148704 | 0.3848739525  | -1.1356435414 |
| C | -3.1149947602 | 0.8714789617  | 1.1984976972  |
| C | -4.3671419763 | -1.2479496503 | 0.6830162528  |
| H | -4.5347889486 | -2.055535729  | -0.0368974705 |
| H | -5.3210669482 | -0.7349953426 | 0.8524187038  |
| H | -4.0563452632 | -1.7033598356 | 1.6280918994  |
| H | -2.4263455881 | 1.6363319638  | 0.8302756613  |
| H | -2.7259702355 | 0.4965524439  | 2.1489675765  |
| H | -4.0756666901 | 1.3568695725  | 1.4045855294  |
| H | -3.1354481552 | 1.1125404401  | -1.5511927441 |
| H | -4.7753032475 | 0.9147247723  | -0.9254214081 |
| H | -4.0491473428 | -0.3666332346 | -1.9035458464 |
| H | -0.3178547935 | 1.2178070072  | 0.4445069954  |
| H | -0.7341534672 | 1.628510765   | -1.2124176257 |
| C | 1.2075071933  | 2.3526481359  | -0.6002622367 |
| H | 2.0034910579  | 2.0536076956  | 0.0948197636  |
| C | 0.7308973582  | 3.7713473369  | -0.2527524491 |
| H | 1.6630131841  | 2.3584806741  | -1.5995090416 |
| H | -0.0585378867 | 4.069278104   | -0.9566444516 |
| H | 1.5606985671  | 4.4718348123  | -0.4117213919 |
| C | 0.2176098246  | 3.9219717978  | 1.1841087917  |
| H | -0.0440097193 | 4.9620239003  | 1.4044773715  |
| H | 0.9806715967  | 3.6091370811  | 1.9066282297  |
| H | -0.6748835619 | 3.3143791671  | 1.3645844847  |
| C | 3.6498089743  | -1.2031474543 | -1.0441796557 |
| H | 1.8992615888  | -2.3973461245 | -1.4482949276 |
| H | 2.531488511   | -2.6071990313 | 0.1736044133  |
| H | 4.3167137271  | -1.9928069739 | -1.4181386562 |
| C | 4.3816011977  | -0.4041299543 | 0.0457552222  |
| H | 3.4429840243  | -0.538295774  | -1.8924079885 |

|   |              |               |               |
|---|--------------|---------------|---------------|
| C | 4.7490445039 | -1.2278946112 | 1.2846752066  |
| H | 3.7623446198 | 0.4497474641  | 0.3465762334  |
| H | 5.2943850943 | 0.0221230906  | -0.3892082139 |
| H | 5.3421953007 | -2.1087061353 | 1.0118564292  |
| H | 3.857880019  | -1.5820632198 | 1.813587896   |
| H | 5.3370920073 | -0.6360500794 | 1.9935824755  |
| H | 5.3370920073 | -0.6360500794 | 1.9935824755  |

TS endo 0095

E(RB3LYP) = -706.413085871 A.U.

First frequency = -522.7410  $\text{cm}^{-1}$

|   |               |               |               |
|---|---------------|---------------|---------------|
| H | -1.4706831328 | -1.1946639294 | -2.0079515791 |
| C | -1.1636265999 | -1.3414132309 | -0.978901925  |
| H | -0.379815898  | -2.0799141442 | -0.8620571678 |
| C | -2.0411045561 | -1.0862172334 | 0.0720624003  |
| C | -1.5322442612 | -1.1913863577 | 1.3853645905  |
| C | -0.228759524  | -1.5732702948 | 1.6537846624  |
| H | 0.1465408622  | -1.5195261555 | 2.6722383054  |
| H | 0.2587431346  | -2.3218842738 | 1.0405523195  |
| C | 1.102711518   | -0.1618212734 | 0.508956875   |
| H | 1.020010585   | 0.5353292528  | 1.3381439506  |
| C | 2.3563722652  | -1.0102700848 | 0.4808138288  |
| C | 0.4535051688  | 0.1762352582  | -0.683126906  |
| H | 0.9039238008  | -0.1896638357 | -1.6061200334 |
| C | -0.3256610606 | 1.4657358037  | -0.8112122914 |
| C | -3.4765301348 | -0.5591300305 | -0.1386833326 |
| H | -2.1179862516 | -0.7742228976 | 2.2012305627  |
| C | -3.7006103429 | 0.8123803897  | 0.5387855776  |
| C | -4.4448225638 | -1.5897857744 | 0.4914715122  |
| C | -3.8362771958 | -0.4141212903 | -1.6283209818 |
| H | -3.7471474489 | -1.3663042881 | -2.1607706368 |
| H | -3.1976539468 | 0.3197880644  | -2.1308675217 |
| H | -4.8717044422 | -0.072284961  | -1.7282044184 |
| H | -4.2632227199 | -1.7048613092 | 1.5642583555  |
| H | -4.3228625324 | -2.572926492  | 0.0254413428  |
| H | -5.4855188355 | -1.2724751849 | 0.3569460116  |
| H | -3.0758346019 | 1.5842931699  | 0.0821556582  |

|   |               |               |               |
|---|---------------|---------------|---------------|
| H | -3.4752930889 | 0.786093923   | 1.6083771573  |
| H | -4.7472298297 | 1.1191554697  | 0.4309828299  |
| H | -0.8631681819 | 1.6456479431  | 0.1259649934  |
| H | -1.0931579801 | 1.3613099761  | -1.5859234786 |
| C | 0.5375820667  | 2.6966606829  | -1.1687776781 |
| H | 1.0859553792  | 2.4802863654  | -2.0956727643 |
| C | 1.5338144063  | 3.1612859278  | -0.0959277379 |
| H | -0.1397363634 | 3.5301842793  | -1.4031344262 |
| H | 2.1247788778  | 3.9887014044  | -0.5092816545 |
| H | 2.2449113818  | 2.3561170998  | 0.1166717397  |
| C | 0.875352126   | 3.6228168891  | 1.20864545    |
| H | 0.1484945838  | 4.4221485413  | 1.0218499086  |
| H | 1.6201497664  | 4.0069379968  | 1.9133758684  |
| H | 0.3424579563  | 2.8070269439  | 1.7077995158  |
| C | 3.6204205537  | -0.2033821153 | 0.1290472772  |
| H | 2.2213012929  | -1.8160063047 | -0.2533029949 |
| H | 2.5143715503  | -1.5006487679 | 1.4503162063  |
| H | 3.4822244781  | 0.267053021   | -0.8538474298 |
| C | 4.9153648812  | -1.030587551  | 0.1271138326  |
| H | 3.7217437743  | 0.618587098   | 0.8498565568  |
| C | 4.9657336525  | -2.1104807725 | -0.9599426606 |
| H | 5.0479973362  | -1.4963251699 | 1.1134018305  |
| H | 5.7665239307  | -0.3505244931 | -0.0048902372 |
| H | 4.1915305964  | -2.8708056951 | -0.815559605  |
| H | 5.9324595434  | -2.6243747567 | -0.9630283614 |
| H | 4.817521595   | -1.6720664648 | -1.9538521277 |
| H | 4.817521595   | -1.6720664648 | -1.9538521277 |

TS endo 0099

E(RB3LYP) = -706.413177900 A.U.

First frequency = -512.4471  $\text{cm}^{-1}$

|   |               |               |               |
|---|---------------|---------------|---------------|
| H | -1.6106488941 | 0.0316271401  | -2.0142176015 |
| C | -1.2591728367 | -0.6672627333 | -1.264143585  |
| H | -0.4927546367 | -1.3419877066 | -1.6252102731 |
| C | -2.0718321528 | -1.043071115  | -0.1990448551 |
| C | -1.5014156338 | -1.8669743296 | 0.7982120004  |
| C | -0.2018924028 | -2.3375237259 | 0.7298310089  |

|   |               |               |               |
|---|---------------|---------------|---------------|
| H | 0.2232296655  | -2.8646170279 | 1.5796536086  |
| H | 0.2357749758  | -2.6058400796 | -0.2242825731 |
| C | 1.1304198567  | -0.5180423423 | 0.4939138258  |
| H | 1.1058927513  | -0.3977769396 | 1.574897194   |
| C | 2.3615344908  | -1.2005069099 | -0.0602778854 |
| C | 0.4268260539  | 0.4197874837  | -0.264114172  |
| H | 0.804673961   | 0.635314592   | -1.2620846757 |
| C | -0.3102521863 | 1.5392444127  | 0.4338376295  |
| C | -3.4988749064 | -0.4905726931 | 0.0037307929  |
| H | -2.0327744816 | -1.9794041315 | 1.7403340012  |
| C | -3.6597245142 | 0.2408615486  | 1.3560959555  |
| C | -4.4678312946 | -1.6977618663 | -0.0267183236 |
| C | -3.9137667407 | 0.4861815511  | -1.1113673373 |
| H | -3.8801553887 | 0.0130873331  | -2.0977957422 |
| H | -3.270100546  | 1.3718252819  | -1.134235073  |
| H | -4.9399113298 | 0.8284259223  | -0.9417200289 |
| H | -4.3920802088 | -2.2328585285 | -0.9788491453 |
| H | -5.5043370138 | -1.363136231  | 0.0979753974  |
| H | -4.2436873214 | -2.4090811436 | 0.7739642196  |
| H | -3.034416544  | 1.1365150214  | 1.3966907658  |
| H | -3.3935671499 | -0.3949205933 | 2.2047922462  |
| H | -4.7015757367 | 0.5518620673  | 1.4934807072  |
| H | -0.8458884071 | 1.112591463   | 1.2894713008  |
| H | -1.0745681626 | 1.9656006847  | -0.2245653602 |
| C | 0.6171575437  | 2.6620064053  | 0.9448905007  |
| H | 0.0062862909  | 3.4039961135  | 1.4783947819  |
| C | 1.429818295   | 3.3759109368  | -0.1468501778 |
| H | 1.3099726795  | 2.237239141   | 1.682430451   |
| H | 2.1143182918  | 2.659015547   | -0.6173700992 |
| H | 2.0656008908  | 4.1329426651  | 0.3294471241  |
| C | 0.5723431511  | 4.0439996691  | -1.2272671467 |
| H | 1.1918907616  | 4.6036612214  | -1.9355283146 |
| H | -0.1448688207 | 4.7449018759  | -0.7840467152 |
| H | 0.000289925   | 3.3080729648  | -1.8021423637 |
| C | 3.6145885404  | -0.3071842686 | 0.0136807116  |
| H | 2.1864773119  | -1.475800979  | -1.1110080931 |
| H | 2.5485348904  | -2.1372263927 | 0.4768215401  |
| H | 3.4079447479  | 0.6251349817  | -0.5261650707 |

|   |              |               |               |
|---|--------------|---------------|---------------|
| C | 4.8864429451 | -0.9531615811 | -0.5575016521 |
| H | 3.7888589214 | -0.0200770188 | 1.0603128139  |
| C | 5.3825939763 | -2.1710192664 | 0.2306671386  |
| H | 5.6817727576 | -0.1973452325 | -0.5841445776 |
| H | 4.7056910695 | -1.2413634132 | -1.6023777472 |
| H | 5.5564565311 | -1.9122962099 | 1.2817505505  |
| H | 6.3241780228 | -2.550726496  | -0.1792230433 |
| H | 4.6606071448 | -2.9934951014 | 0.2080563196  |
| H | 4.6606071448 | -2.9934951014 | 0.2080563196  |

TS endo 0105

E(RB3LYP) = -706.413257241 A.U.

First frequency = -528.3666  $\text{cm}^{-1}$

|   |               |               |               |
|---|---------------|---------------|---------------|
| H | -1.4889686453 | -0.1406162633 | -2.0079989286 |
| C | -1.2692714891 | -0.8520181612 | -1.2201227906 |
| H | -0.6392679709 | -1.6718989192 | -1.5425522405 |
| C | -2.1485672062 | -1.0278040643 | -0.1528607375 |
| C | -1.7377882611 | -1.8826018977 | 0.8930538461  |
| C | -0.5360440989 | -2.5703053309 | 0.8645531169  |
| H | -0.209090807  | -3.1176330129 | 1.7446231028  |
| H | -0.1578856688 | -2.9664674717 | -0.0702889277 |
| C | 1.0968313002  | -1.0444184828 | 0.5467509695  |
| H | 1.1039210743  | -0.8766922897 | 1.6222877507  |
| C | 2.1839404592  | -1.966305634  | 0.032378358   |
| C | 0.5507211991  | -0.0275359672 | -0.2457618994 |
| H | 0.960855502   | 0.0992717818  | -1.2454471857 |
| C | -0.0067693855 | 1.2115919748  | 0.4212724316  |
| C | -3.4600650311 | -0.2272975999 | -0.0035326186 |
| H | -2.285859061  | -1.8526603755 | 1.8318215436  |
| C | -3.5024027337 | 0.5947581087  | 1.3051159331  |
| C | -4.6220804481 | -1.2505221281 | 0.0154026049  |
| C | -3.6947776813 | 0.7412301587  | -1.1769236074 |
| H | -3.73368153   | 0.2142600295  | -2.1354496252 |
| H | -2.9114400867 | 1.5040742217  | -1.2379249413 |
| H | -4.6495630164 | 1.2603411449  | -1.0436408229 |
| H | -5.586429423  | -0.7366902283 | 0.1041765226  |
| H | -4.5294335065 | -1.9431827973 | 0.8573449936  |

|   |               |               |               |
|---|---------------|---------------|---------------|
| H | -4.6326616716 | -1.8437565181 | -0.9046911524 |
| H | -4.4763940395 | 1.0864049582  | 1.408453621   |
| H | -2.7326548581 | 1.3705849542  | 1.3097244261  |
| H | -3.3558357308 | -0.0301489245 | 2.1901955508  |
| H | -0.5169225364 | 0.8973538358  | 1.3390214163  |
| H | -0.7738764569 | 1.674754456   | -0.2069959396 |
| C | 1.0590577285  | 2.267479751   | 0.7803575178  |
| H | 0.5921757307  | 3.0362644423  | 1.4121444882  |
| C | 1.7120230842  | 2.9594893664  | -0.4281753231 |
| H | 1.8356696646  | 1.7926122501  | 1.3933910143  |
| H | 2.1896272364  | 2.2105720271  | -1.0715553073 |
| H | 2.5218505256  | 3.6053655345  | -0.0656893162 |
| C | 0.7391771968  | 3.7979419079  | -1.2654980675 |
| H | 1.2627232885  | 4.3246179548  | -2.0699834016 |
| H | 0.2339438242  | 4.5492911794  | -0.6473393255 |
| H | -0.0353986887 | 3.1791297599  | -1.7303558998 |
| C | 3.6179738685  | -1.476432487  | 0.3234003688  |
| H | 2.0619814563  | -2.100693247  | -1.0521129243 |
| H | 2.07854818    | -2.9632085717 | 0.4779423326  |
| H | 3.7326729071  | -1.3339747193 | 1.4074833723  |
| C | 4.0183639157  | -0.1869741335 | -0.3982159556 |
| H | 4.3202336946  | -2.2751899161 | 0.0466160959  |
| C | 5.4666179697  | 0.225166712   | -0.1208307253 |
| H | 3.3444006057  | 0.6192565072  | -0.0945898727 |
| H | 3.8706601381  | -0.3173224105 | -1.4795855933 |
| H | 5.7266473663  | 1.1525280703  | -0.6416823636 |
| H | 6.1700761054  | -0.5498820619 | -0.4463143486 |
| H | 5.6299286561  | 0.388283505   | 0.9507747395  |
| H | 5.6299286561  | 0.388283505   | 0.9507747395  |

TS endo 0118

E(RB3LYP) = -706.412614792 A.U.

First frequency = -521.3151  $\text{cm}^{-1}$

|   |               |               |               |
|---|---------------|---------------|---------------|
| H | -1.6544943468 | -0.3323254005 | -2.282372978  |
| C | -1.1738017733 | -0.829391957  | -1.4475009297 |
| H | -0.382802833  | -1.5072798439 | -1.7475645361 |
| C | -1.8664444809 | -1.0527758598 | -0.2591826467 |

|   |               |               |               |
|---|---------------|---------------|---------------|
| C | -1.1434755346 | -1.6101224181 | 0.8194114462  |
| C | 0.1796668617  | -2.0001550624 | 0.7231951186  |
| H | 0.7067709004  | -2.313012593  | 1.6193556386  |
| H | 0.5679730549  | -2.4198203413 | -0.1968698198 |
| C | 1.3412744983  | -0.1597064944 | -0.0768808088 |
| H | 1.4558340659  | 0.1338799967  | 0.9637389942  |
| C | 2.5319260594  | -0.8422721993 | -0.7188047869 |
| C | 0.4329166507  | 0.5600018814  | -0.8544054663 |
| H | 0.666306408   | 0.6689722105  | -1.9131063929 |
| C | -0.338337207  | 1.6975285992  | -0.2286234893 |
| C | -3.3233738651 | -0.5947218847 | -0.0351203981 |
| H | -1.5880023477 | -1.5721871337 | 1.8113156154  |
| C | -4.1628559639 | -1.8622780534 | 0.2588274244  |
| C | -3.9186713352 | 0.0974404138  | -1.2745063967 |
| C | -3.4595175905 | 0.3773046605  | 1.1596449579  |
| H | -2.9331719014 | 1.3157464399  | 0.9677921503  |
| H | -3.063660573  | -0.0478438401 | 2.0859338959  |
| H | -4.5156223579 | 0.613427124   | 1.3326848531  |
| H | -4.959122256  | 0.3770353169  | -1.0790735623 |
| H | -3.9101357516 | -0.5602410221 | -2.1493908059 |
| H | -3.3735440758 | 1.0124793142  | -1.5288526302 |
| H | -5.2164467455 | -1.6001110493 | 0.4109741966  |
| H | -3.8087942603 | -2.3748435065 | 1.1583879258  |
| H | -4.1021074788 | -2.5703170887 | -0.574015201  |
| H | -0.7202914381 | 1.3619155079  | 0.7434146952  |
| H | -1.2153384534 | 1.9475872142  | -0.8378835846 |
| C | 0.5092181833  | 2.964719333   | -0.0241677675 |
| H | 1.378037002   | 2.7211640334  | 0.6019122224  |
| C | -0.2799219232 | 4.1132217561  | 0.614404901   |
| H | 0.9155673132  | 3.2933127289  | -0.9912707488 |
| H | -0.6874598693 | 3.7772141979  | 1.5778513502  |
| H | -1.1484725597 | 4.3493277836  | -0.0156614208 |
| C | 0.5617590306  | 5.3751906987  | 0.8236266778  |
| H | -0.0234574198 | 6.179545433   | 1.2813041058  |
| H | 0.9547600536  | 5.7485154988  | -0.12901182   |
| H | 1.418803962   | 5.1727231765  | 1.4761406439  |
| C | 3.4519447402  | -1.5888623917 | 0.2529772842  |
| H | 3.1306664533  | -0.0859761332 | -1.2492350943 |

|   |              |               |               |
|---|--------------|---------------|---------------|
| H | 2.1853892993 | -1.5334372326 | -1.5034384306 |
| H | 3.7704632682 | -0.8976382491 | 1.0463565352  |
| C | 4.6896962244 | -2.1842866136 | -0.4265573986 |
| H | 2.8969666378 | -2.3905347222 | 0.7545142471  |
| C | 5.6063115225 | -2.9286659548 | 0.5483664903  |
| H | 5.2527304385 | -1.381911876  | -0.9225634521 |
| H | 4.3689144769 | -2.8676854221 | -1.2248203588 |
| H | 6.4823101342 | -3.3447733803 | 0.0403282118  |
| H | 5.0764231156 | -3.7569197269 | 1.0326674192  |
| H | 5.9651939288 | -2.2603480128 | 1.339499336   |
| H | 5.9651939288 | -2.2603480128 | 1.339499336   |

TS endo 0121

E(RB3LYP) = -706.414128257 A.U.

First frequency = -512.1437 cm<sup>-1</sup>

|   |               |               |               |
|---|---------------|---------------|---------------|
| H | -1.8403557012 | 0.1385441527  | -1.9801621976 |
| C | -1.4195179269 | -0.631588174  | -1.3442585238 |
| H | -0.7533570148 | -1.3082469348 | -1.8655408857 |
| C | -2.0852018717 | -1.0545539014 | -0.1975714229 |
| C | -1.4196288999 | -1.9776986271 | 0.6411862305  |
| C | -0.1764185941 | -2.5058099631 | 0.3396123114  |
| H | 0.3401735696  | -3.1153984315 | 1.0760546818  |
| H | 0.0916918021  | -2.7254982819 | -0.6867142122 |
| C | 1.2131847768  | -0.7425640695 | 0.0114307066  |
| H | 1.3733841083  | -0.7230618172 | 1.0862845282  |
| C | 2.2755178253  | -1.4403610129 | -0.8107948024 |
| C | 0.4536997528  | 0.293159254   | -0.5353716432 |
| H | 0.6801629863  | 0.5886098637  | -1.5583008662 |
| C | -0.1082446955 | 1.3659454465  | 0.3680090666  |
| C | -3.4363760493 | -0.4608577329 | 0.2553463535  |
| H | -1.8089269708 | -2.1367665832 | 1.6440501412  |
| C | -3.3641026599 | 0.1624983318  | 1.668152063   |
| C | -4.4620830951 | -1.6205479544 | 0.2765443716  |
| C | -3.9542401565 | 0.6214199891  | -0.7090919497 |
| H | -3.2724160371 | 1.4768102586  | -0.760768672  |
| H | -4.9244161254 | 0.9928268361  | -0.3631529688 |
| H | -4.0904486049 | 0.2303478696  | -1.722235559  |



|   |               |               |               |
|---|---------------|---------------|---------------|
| H | -4.1635365788 | -2.4033145918 | 0.9804690314  |
| H | -4.5508679231 | -2.0788826442 | -0.7137301715 |
| H | -5.4512498174 | -1.2548510804 | 0.5760302222  |
| H | -3.0097797966 | -0.5499334455 | 2.4179459488  |
| H | -4.3589047225 | 0.4995345601  | 1.9808183828  |
| H | -2.6971158155 | 1.0284324283  | 1.6837889156  |
| H | -0.579626458  | 0.8748830769  | 1.2267701104  |
| H | -0.9033500519 | 1.9168999096  | -0.1460035324 |
| C | 0.9520218896  | 2.3568215679  | 0.8940986348  |
| H | 0.4487864109  | 3.1021322767  | 1.5261567182  |
| C | 1.7570144635  | 3.0815753205  | -0.195377077  |
| H | 1.6473503252  | 1.8150829276  | 1.5477845794  |
| H | 2.3487115096  | 2.3468889974  | -0.7554461221 |
| H | 2.4814852442  | 3.748505556   | 0.2888788872  |
| C | 0.8957206869  | 3.8913803574  | -1.17042788   |
| H | 0.2696843546  | 4.6158728305  | -0.6363451914 |
| H | 0.2284237941  | 3.2454683222  | -1.7509279575 |
| H | 1.5161477895  | 4.4463880434  | -1.8815424282 |
| C | 3.5536868323  | -0.5989780721 | -1.0181962928 |
| H | 1.863798684   | -1.6845874232 | -1.8002189927 |
| H | 2.5413481554  | -2.3982130988 | -0.3490102936 |
| H | 4.2703769356  | -1.1906467143 | -1.6050174343 |
| C | 4.2323689757  | -0.1240185422 | 0.2756328663  |
| H | 3.3008055542  | 0.2776638858  | -1.6279894701 |
| C | 4.6492700719  | -1.2608376364 | 1.214687739   |
| H | 3.5583826003  | 0.5590726901  | 0.8065708866  |
| H | 5.1163070988  | 0.4686598405  | 0.0083899959  |
| H | 3.781030241   | -1.8127460563 | 1.5900830829  |
| H | 5.1946058516  | -0.8775038453 | 2.0831577678  |
| H | 5.2998077656  | -1.9789903857 | 0.7017586929  |
| H | 5.2998077656  | -1.9789903857 | 0.7017586929  |

TS endo 0126

E(RB3LYP) = -706.412712498 A.U.

First frequency = -516.0024  $\text{cm}^{-1}$

|   |               |               |               |
|---|---------------|---------------|---------------|
| H | -1.1029700373 | 0.3807526315  | -2.1823585306 |
| C | -0.9579497355 | -0.4195602182 | -1.4671098163 |

|   |               |               |               |
|---|---------------|---------------|---------------|
| H | -0.2911769831 | -1.1984896458 | -1.8128089805 |
| C | -1.9069169332 | -0.6929251804 | -0.4898796029 |
| C | -1.5981185428 | -1.6819011187 | 0.4727455096  |
| C | -0.4240414978 | -2.4161810734 | 0.4446360906  |
| H | -0.1979692107 | -3.0896888645 | 1.267102748   |
| H | 0.0005597078  | -2.7211143739 | -0.5050444562 |
| C | 1.2582434196  | -0.9854644836 | 0.5038091738  |
| H | 1.1686092889  | -0.9191801541 | 1.586586133   |
| C | 2.3506046485  | -1.907534456  | 0.0001937917  |
| C | 0.9229376462  | 0.158643645   | -0.2217267645 |
| H | 1.4276868997  | 0.3064342693  | -1.1756772507 |
| C | 0.4614656663  | 1.4122307995  | 0.487249225   |
| C | -3.2294752411 | 0.0922078884  | -0.3504087818 |
| H | -2.2147241372 | -1.7436679658 | 1.3659628518  |
| C | -4.3846445888 | -0.9153402632 | -0.570198761  |
| C | -3.3678141429 | 1.2100907302  | -1.3990216576 |
| C | -3.3869802345 | 0.7281564376  | 1.048870451   |
| H | -3.3458631596 | -0.0159213748 | 1.8487335273  |
| H | -4.3544923588 | 1.2372908122  | 1.124937194   |
| H | -2.6056304345 | 1.4680363737  | 1.236440267   |
| H | -2.5899320974 | 1.970668465   | -1.2857464316 |
| H | -4.3356195858 | 1.7090663576  | -1.2831836654 |
| H | -3.3173948662 | 0.8172104928  | -2.4192714179 |
| H | -4.3609082599 | -1.7178599118 | 0.1731507649  |
| H | -4.314821794  | -1.3761984193 | -1.5608532922 |
| H | -5.3548976992 | -0.4106738622 | -0.4935972263 |
| H | 1.1910290248  | 1.6616553371  | 1.2739333741  |
| H | -0.4761904948 | 1.1971090909  | 1.0142229998  |
| C | 0.3143816248  | 2.6283981554  | -0.4343112112 |
| H | 1.2285659792  | 2.7179024176  | -1.037143912  |
| C | 0.0799132058  | 3.9587012138  | 0.2961909248  |
| H | -0.4997584847 | 2.451467642   | -1.1468427511 |
| H | 0.0828415231  | 4.7701365523  | -0.4427804137 |
| H | 0.9284294731  | 4.1547706825  | 0.9661350121  |
| C | -1.2238388501 | 4.0189019353  | 1.0992504521  |
| H | -2.0898769676 | 3.8069410759  | 0.4620445826  |
| H | -1.3705966103 | 5.0093174928  | 1.542523446   |
| H | -1.228527748  | 3.2906080396  | 1.9164307698  |

|   |              |               |               |
|---|--------------|---------------|---------------|
| C | 3.7617916552 | -1.3569495783 | 0.2688394579  |
| H | 2.2282641871 | -2.0596840442 | -1.0821852107 |
| H | 2.2636617731 | -2.8998329794 | 0.4612484546  |
| H | 3.8621202089 | -0.3768920531 | -0.2165199692 |
| C | 4.8776283389 | -2.2895969226 | -0.2151593891 |
| H | 3.8792537083 | -1.1745198706 | 1.3463803937  |
| C | 6.2790430617 | -1.7330970848 | 0.0522778681  |
| H | 4.7529961638 | -2.4731481622 | -1.2912339198 |
| H | 4.7696873382 | -3.2675368387 | 0.2736042303  |
| H | 6.4229127909 | -0.7703750146 | -0.4514202646 |
| H | 7.0584482041 | -2.4152643155 | -0.3027066149 |
| H | 6.4400660121 | -1.5707421678 | 1.1241807756  |
| H | 6.4400660121 | -1.5707421678 | 1.1241807756  |

TS endo 0134

E(RB3LYP) = -706.412407467 A.U.

First frequency = -493.2291 cm<sup>-1</sup>

|   |               |               |               |
|---|---------------|---------------|---------------|
| H | -1.4809239306 | -0.7934407208 | -2.1298867029 |
| C | -1.1690198157 | -1.1844310385 | -1.1662633704 |
| H | -0.40107825   | -1.943904169  | -1.2306268519 |
| C | -2.025893171  | -1.1315813116 | -0.0728829816 |
| C | -1.5219842816 | -1.5544593395 | 1.1796535326  |
| C | -0.2508629995 | -2.0781018072 | 1.337221746   |
| H | 0.1234865797  | -2.2827601196 | 2.3364320136  |
| H | 0.1929715123  | -2.690234364  | 0.5609450096  |
| C | 1.1930572499  | -0.5170631339 | 0.5747015668  |
| H | 1.1287511156  | -0.0346667382 | 1.5477095195  |
| C | 2.4044523387  | -1.3971298533 | 0.3593243732  |
| C | 0.5923061071  | 0.1396420912  | -0.4968568088 |
| H | 1.0139303851  | -0.027235363  | -1.4868557661 |
| C | -0.1034819468 | 1.4600329313  | -0.2784343677 |
| C | -3.4502046143 | -0.5501670272 | -0.2189874614 |
| H | -2.0694730515 | -1.2911074549 | 2.0786253967  |
| C | -4.1354800161 | -0.3077260938 | 1.1392821843  |
| C | -4.2876831171 | -1.5903752392 | -1.003518468  |
| C | -3.4681907322 | 0.7841863169  | -0.9951892896 |
| H | -2.9555441043 | 1.5725418437  | -0.4387230413 |

|   |               |               |               |
|---|---------------|---------------|---------------|
| H | -4.5030524459 | 1.1050551162  | -1.1583298836 |
| H | -2.9953503646 | 0.7011837817  | -1.9775150741 |
| H | -4.3001747408 | -2.5529232043 | -0.4818097502 |
| H | -3.8698621198 | -1.7566460986 | -2.001218222  |
| H | -5.3233430276 | -1.248968936  | -1.1184127209 |
| H | -4.2413769455 | -1.2326166381 | 1.7146970934  |
| H | -5.1408863541 | 0.0950682415  | 0.9788781122  |
| H | -3.5811094011 | 0.4144069516  | 1.748028125   |
| H | -0.7892669475 | 1.357883791   | 0.5740703148  |
| H | -0.7211294201 | 1.7125984809  | -1.1464727886 |
| C | 0.871673674   | 2.6187664338  | -0.0025958877 |
| H | 1.4847364157  | 2.3757073254  | 0.8754557217  |
| C | 0.1600281428  | 3.9577800663  | 0.2203206808  |
| H | 1.5734492633  | 2.7122517966  | -0.8434439044 |
| H | -0.5442319594 | 3.8555145629  | 1.0575137015  |
| H | -0.4508318456 | 4.1942881156  | -0.6616775845 |
| C | 1.127854191   | 5.1110152181  | 0.500040706   |
| H | 0.5963434775  | 6.0554076574  | 0.656897311   |
| H | 1.8223235984  | 5.2534408297  | -0.3358767706 |
| H | 1.7278203013  | 4.9125712855  | 1.3955810393  |
| C | 3.7027843124  | -0.5769231618 | 0.2353982586  |
| H | 2.2565815606  | -1.993044631  | -0.5511075297 |
| H | 2.5171261669  | -2.1139676236 | 1.1833204353  |
| H | 3.6129694663  | 0.1014770802  | -0.6237621481 |
| C | 4.9750908436  | -1.4261510206 | 0.0936360186  |
| H | 3.7946928716  | 0.0660811172  | 1.1208239999  |
| C | 5.0325235115  | -2.254214984  | -1.1953157865 |
| H | 5.0626927626  | -2.0935007816 | 0.9621452772  |
| H | 5.847770616   | -0.761708572  | 0.1314519405  |
| H | 5.9847789447  | -2.7875264906 | -1.2818479415 |
| H | 4.9281288929  | -1.6119826639 | -2.077761868  |
| H | 4.2337505639  | -3.0017544724 | -1.2346914991 |
| H | 4.2337505639  | -3.0017544724 | -1.2346914991 |

TS endo 0136

E(RB3LYP) = -706.413772881 A.U.

First frequency = -525.5812  $\text{cm}^{-1}$

|   |               |               |               |
|---|---------------|---------------|---------------|
| H | -1.1218156694 | 0.0172274577  | -2.0901184305 |
| C | -0.9934736493 | -0.7288563679 | -1.3151057296 |
| H | -0.3976576202 | -1.5774677537 | -1.623668709  |
| C | -1.913293439  | -0.8541238572 | -0.2800760507 |
| C | -1.6196937571 | -1.773118811  | 0.7525430405  |
| C | -0.5096893348 | -2.6049665139 | 0.7176684765  |
| H | -0.2834901313 | -3.2256932859 | 1.5807816002  |
| H | -0.1958148871 | -3.0351841531 | -0.2270249032 |
| C | 1.2898885156  | -1.3656224812 | 0.5375922156  |
| H | 1.3167185357  | -1.2698769812 | 1.6220240831  |
| C | 2.2568043832  | -2.3831854022 | -0.0347410744 |
| C | 0.9624468617  | -0.2081913494 | -0.1746241673 |
| H | 1.4020917819  | -0.0738343943 | -1.1602489565 |
| C | 0.5952537431  | 1.0435813211  | 0.5838630371  |
| C | -3.1655692003 | 0.0415907197  | -0.1499692992 |
| H | -2.17848274   | -1.7028443289 | 1.6830393756  |
| C | -3.3885770124 | 0.9277299024  | -1.3895668754 |
| C | -3.0936613046 | 0.9576676898  | 1.0916198755  |
| C | -4.3958283714 | -0.8889448941 | -0.014347716  |
| H | -4.3351243797 | -1.5144636182 | 0.8806724868  |
| H | -4.4773909955 | -1.5536194897 | -0.8803928272 |
| H | -5.3161435897 | -0.2972554787 | 0.051816959   |
| H | -2.9265817185 | 0.3886605985  | 2.0105741469  |
| H | -4.0312391663 | 1.5129597077  | 1.209760645   |
| H | -2.2847230687 | 1.6857887085  | 0.9942939371  |
| H | -3.4653085358 | 0.3285233095  | -2.302275973  |
| H | -2.5837119056 | 1.6559610995  | -1.5265145142 |
| H | -4.3207938357 | 1.4914767404  | -1.2784229829 |
| H | 1.4297919319  | 1.304036946   | 1.254133013   |
| H | -0.2489438239 | 0.8137806452  | 1.2487031347  |
| C | 0.2747257636  | 2.2591131194  | -0.2866301908 |
| H | 1.1030688293  | 2.4302990927  | -0.9890370047 |
| C | 0.0275433938  | 3.5385804187  | 0.5193167903  |
| H | -0.6033625886 | 2.0412453224  | -0.9041361652 |
| H | 0.9281470608  | 3.7814247946  | 1.0994184011  |
| H | -0.7653163272 | 3.3576498256  | 1.2576430485  |
| C | -0.35814541   | 4.7301542524  | -0.3613232562 |
| H | -1.2796081376 | 4.5235481299  | -0.9179299897 |

|   |               |               |               |
|---|---------------|---------------|---------------|
| H | 0.4268456541  | 4.9491419448  | -1.0942681674 |
| H | -0.5227241152 | 5.6352136211  | 0.2323137385  |
| C | 3.7370986302  | -2.0650023771 | 0.2628427233  |
| H | 2.1129788459  | -2.4472653099 | -1.1230218296 |
| H | 2.0400441547  | -3.3822618229 | 0.3633767811  |
| H | 3.8768856068  | -2.0062188766 | 1.3517276743  |
| C | 4.268156564   | -0.780080246  | -0.3818688901 |
| H | 4.3492165179  | -2.912630507  | -0.0757255971 |
| C | 5.756153857   | -0.5509281136 | -0.101273925  |
| H | 3.6891032198  | 0.0773073424  | -0.0199497036 |
| H | 4.0987806621  | -0.8243861821 | -1.46687079   |
| H | 6.1160184489  | 0.3719272904  | -0.5678489582 |
| H | 6.3643844821  | -1.3782441348 | -0.484790078  |
| H | 5.9458080947  | -0.4755412762 | 0.9757256031  |
| H | 5.9458080947  | -0.4755412762 | 0.9757256031  |

TS endo 0137

E(RB3LYP) = -706.411876658 A.U.

First frequency = -523.2880  $\text{cm}^{-1}$

|   |               |               |               |
|---|---------------|---------------|---------------|
| H | -1.8514605212 | -0.4932172569 | -2.2366807152 |
| C | -1.3313920509 | -0.9133229424 | -1.3832281993 |
| H | -0.4920658363 | -1.5423274619 | -1.6576880955 |
| C | -2.0023831905 | -1.1383647575 | -0.1823723773 |
| C | -1.2361517197 | -1.5905533537 | 0.9145098859  |
| C | 0.1148770897  | -1.8727606191 | 0.8290099186  |
| H | 0.6661015251  | -2.1025084647 | 1.7357276841  |
| H | 0.5363530024  | -2.2987814028 | -0.0734434668 |
| C | 1.1082921183  | 0.0224290766  | -0.0467243105 |
| H | 1.182681786   | 0.3770084786  | 0.9772589855  |
| C | 2.3642428874  | -0.5827142262 | -0.6422515502 |
| C | 0.1585378312  | 0.626946689   | -0.8738023828 |
| H | 0.4006695345  | 0.6815127162  | -1.9355286543 |
| C | -0.6979250497 | 1.7599801438  | -0.3538013214 |
| C | -3.4877673175 | -0.7798092244 | 0.0337856943  |
| H | -1.6805893123 | -1.5457868931 | 1.9062149311  |
| C | -4.1453107521 | -0.2081290192 | -1.2352192184 |
| C | -3.6806662788 | 0.247816414   | 1.1727971347  |

|   |               |               |               |
|---|---------------|---------------|---------------|
| C | -4.2286946157 | -2.0858054494 | 0.4117541243  |
| H | -4.125586673  | -2.8342777208 | -0.3805776702 |
| H | -5.2968718306 | -1.8921152548 | 0.5646332972  |
| H | -3.8290373996 | -2.5191910456 | 1.3334605556  |
| H | -3.2152379667 | 1.2048261507  | 0.9237689863  |
| H | -3.2526467409 | -0.0985213904 | 2.1174354985  |
| H | -4.748698632  | 0.4260359093  | 1.3421941197  |
| H | -3.67846504   | 0.7319219219  | -1.5473506172 |
| H | -5.2035433876 | -0.0021205725 | -1.0438824916 |
| H | -4.0892579498 | -0.9115110742 | -2.072022614  |
| H | -0.9622088588 | 1.5502432036  | 0.6901671458  |
| H | -1.6411284298 | 1.8044556492  | -0.9092688839 |
| C | -0.0229349812 | 3.1451156184  | -0.4426979752 |
| H | 0.2431820947  | 3.3485930373  | -1.4899571097 |
| C | 1.2203537532  | 3.3263346933  | 0.4351956615  |
| H | -0.7652418182 | 3.9072719388  | -0.1665622391 |
| H | 1.9901595541  | 2.6063898345  | 0.1347041909  |
| H | 0.9654568075  | 3.0812562527  | 1.4757126897  |
| C | 1.7898237312  | 4.7463053692  | 0.364511898   |
| H | 1.0524457027  | 5.4863681124  | 0.6963368163  |
| H | 2.0752635038  | 5.0046605888  | -0.6618712169 |
| H | 2.6787584261  | 4.8554359908  | 0.9944872336  |
| C | 3.3357538546  | -1.1907665374 | 0.3747566295  |
| H | 2.8998669905  | 0.1967524866  | -1.2057904343 |
| H | 2.0923430558  | -1.3410714511 | -1.3933964236 |
| H | 3.5759280982  | -0.4342859101 | 1.1355404461  |
| C | 4.6339593296  | -1.6982527521 | -0.2619982556 |
| H | 2.851900206   | -2.0161683352 | 0.9101396121  |
| C | 5.6026887401  | -2.3031591664 | 0.7580133897  |
| H | 5.1257110181  | -0.8711806605 | -0.7920880672 |
| H | 4.3908508779  | -2.4473696353 | -1.028070463  |
| H | 5.146604956   | -3.1532893621 | 1.2781974929  |
| H | 5.8851391482  | -1.5655615861 | 1.5179461696  |
| H | 6.5214104004  | -2.6583922036 | 0.280126129   |
| H | 6.5214104004  | -2.6583922036 | 0.280126129   |

TS endo 0142

E(RB3LYP) = -706.412275408 A.U.

First frequency =  $-527.8386 \text{ cm}^{-1}$

|   |               |               |               |
|---|---------------|---------------|---------------|
| H | -0.9612192414 | -0.7360853713 | -2.0552493487 |
| C | -0.7295985224 | -1.0817327666 | -1.0545198659 |
| H | 0.1054897097  | -1.7678062147 | -1.0146428874 |
| C | -1.7077869211 | -1.1165191828 | -0.0648965246 |
| C | -1.3009863495 | -1.4606501865 | 1.2436636356  |
| C | 0.0064342737  | -1.7878479918 | 1.5623632545  |
| H | 0.2848158398  | -1.9220567939 | 2.6041777211  |
| H | 0.6167003715  | -2.348335432  | 0.8645679898  |
| C | 1.2903522375  | -0.0629145164 | 0.9002445134  |
| H | 1.0120813774  | 0.4484655795  | 1.8192516555  |
| C | 2.6549210097  | -0.7298720285 | 0.9566822748  |
| C | 0.7296406557  | 0.4450656566  | -0.2746516418 |
| H | 1.2858653885  | 0.3300562146  | -1.2015926569 |
| C | -0.1627551819 | 1.6615796658  | -0.1932540925 |
| C | -3.1638168738 | -0.6627250776 | -0.306463212  |
| H | -1.9903242676 | -1.2736727947 | 2.0637699416  |
| C | -3.582227693  | 0.4983055997  | 0.6247277414  |
| C | -4.0773107105 | -1.8803853137 | -0.0236028593 |
| C | -3.4040121047 | -0.2102738013 | -1.7580393065 |
| H | -2.7935808546 | 0.6612478847  | -2.0167104233 |
| H | -4.4538367143 | 0.0716878941  | -1.8896959402 |
| H | -3.1818047587 | -1.0083535311 | -2.4733607947 |
| H | -3.979415276  | -2.2206664629 | 1.0117271285  |
| H | -3.8183117463 | -2.7202235926 | -0.6764418944 |
| H | -5.1285007454 | -1.6217938815 | -0.1968677471 |
| H | -3.0041893611 | 1.4016530297  | 0.4131971146  |
| H | -3.4467038417 | 0.2509416104  | 1.6810521304  |
| H | -4.6419128054 | 0.7355304623  | 0.4766529936  |
| H | -0.850706851  | 1.5317044246  | 0.6510290201  |
| H | -0.7856153821 | 1.7453270549  | -1.092060672  |
| C | 0.6205425488  | 2.9717837526  | -0.0015116707 |
| H | 1.2310645018  | 2.8975685475  | 0.9085665254  |
| C | -0.2882286247 | 4.203000691   | 0.0873312485  |
| H | 1.3293669205  | 3.0990604819  | -0.8320494111 |
| H | -0.9963796169 | 4.0678883777  | 0.9165057391  |
| H | -0.8983849466 | 4.2684560081  | -0.8239790819 |



|   |               |               |               |
|---|---------------|---------------|---------------|
| C | 0.4880860125  | 5.5085870053  | 0.281214909   |
| H | 1.0814189044  | 5.4804455214  | 1.2023397463  |
| H | -0.1826175834 | 6.3719344372  | 0.3425604709  |
| H | 1.1804065418  | 5.681952755   | -0.5506469934 |
| C | 3.0769314516  | -1.5272880336 | -0.2840051669 |
| H | 2.7054793974  | -1.3900299234 | 1.8329214752  |
| H | 3.410227673   | 0.0509027872  | 1.1384258564  |
| H | 2.3242731668  | -2.29323044   | -0.5148618516 |
| C | 4.441367007   | -2.2057871133 | -0.1165387039 |
| H | 3.1137669427  | -0.8662508594 | -1.1593464348 |
| C | 4.8736344998  | -2.9904953752 | -1.3582651646 |
| H | 4.4066400219  | -2.8782424462 | 0.7512894819  |
| H | 5.1963223364  | -1.4436456922 | 0.1200023757  |
| H | 5.8490091314  | -3.4664245276 | -1.2145346614 |
| H | 4.9478592818  | -2.3343339568 | -2.2330377128 |
| H | 4.1500122267  | -3.778046193  | -1.598072394  |
| H | 4.1500122267  | -3.778046193  | -1.598072394  |

TS endo 0146

E(RB3LYP) = -706.413690660 A.U.

First frequency = -524.9626  $\text{cm}^{-1}$

|   |               |               |               |
|---|---------------|---------------|---------------|
| H | -1.3865036278 | 0.0364264961  | -2.0871412901 |
| C | -1.1368988794 | -0.6932922837 | -1.326146631  |
| H | -0.5503840906 | -1.5238888439 | -1.6965167996 |
| C | -1.9195111329 | -0.8372404045 | -0.1864163761 |
| C | -1.4702152239 | -1.7312892882 | 0.8120600855  |
| C | -0.347778468  | -2.5303370766 | 0.652086976   |
| H | 0.0022818877  | -3.1279529134 | 1.4897088571  |
| H | -0.1351623541 | -2.9653581028 | -0.3180510256 |
| C | 1.3730673758  | -1.2249892841 | 0.2242625534  |
| H | 1.5314235381  | -1.1281225953 | 1.2954091909  |
| C | 2.2688263089  | -2.2175907718 | -0.490870339  |
| C | 0.922689287   | -0.0833502077 | -0.4412750935 |
| H | 1.2316827829  | 0.0604191099  | -1.4752001719 |
| C | 0.6083610385  | 1.1603340931  | 0.3530127907  |
| C | -3.1793659875 | 0.0148052085  | 0.0860522884  |
| H | -1.913667662  | -1.6646121407 | 1.8030417647  |

|   |               |               |               |
|---|---------------|---------------|---------------|
| C | -2.9913281125 | 0.9508719249  | 1.3003012269  |
| C | -4.348722852  | -0.9567956676 | 0.3802528889  |
| C | -3.5842033447 | 0.8738340562  | -1.1263175572 |
| H | -4.5163370029 | 1.4055363046  | -0.9081468295 |
| H | -3.7489860593 | 0.2585297512  | -2.016389893  |
| H | -2.8297516401 | 1.62820868    | -1.3684562158 |
| H | -4.5102657872 | -1.6366139716 | -0.4625015435 |
| H | -5.2754600151 | -0.3972771175 | 0.552158943   |
| H | -4.1565764082 | -1.5665819758 | 1.2675408313  |
| H | -2.2269757114 | 1.7051817846  | 1.0986741788  |
| H | -2.694163582  | 0.4013101666  | 2.197997      |
| H | -3.9273415744 | 1.4747710421  | 1.5256003643  |
| H | 1.511689416   | 1.4586748601  | 0.9082595561  |
| H | -0.1338032027 | 0.9043620241  | 1.1220483582  |
| C | 0.1292225549  | 2.3540998818  | -0.4737746117 |
| H | 0.851289314   | 2.5509528293  | -1.2791651851 |
| C | -0.0623005888 | 3.6308433752  | 0.3514109243  |
| H | -0.8122725304 | 2.0955929825  | -0.970407611  |
| H | 0.895973081   | 3.9155641812  | 0.8066056336  |
| H | -0.743141087  | 3.4259396959  | 1.1886434941  |
| C | -0.6091526619 | 4.7966807396  | -0.4768299068 |
| H | -1.5865670332 | 4.5473563981  | -0.9059011383 |
| H | 0.0628605784  | 5.039146659   | -1.3080835172 |
| H | -0.7312553829 | 5.7006681721  | 0.1285759562  |
| C | 3.7144111162  | -1.7182252515 | -0.6845248428 |
| H | 1.8401272747  | -2.4394752402 | -1.4784016564 |
| H | 2.2920736825  | -3.1692412433 | 0.0557559594  |
| H | 4.2713526459  | -2.4608789103 | -1.2730592085 |
| C | 4.4645088685  | -1.4545330275 | 0.6262754292  |
| H | 3.6978188195  | -0.7969994384 | -1.2823789791 |
| C | 5.9133328546  | -1.0130142879 | 0.401271732   |
| H | 4.4462111552  | -2.3646237464 | 1.2420532996  |
| H | 3.9334760517  | -0.6858614716 | 1.2014121978  |
| H | 5.9553531162  | -0.0896771746 | -0.1879018604 |
| H | 6.4791216624  | -1.7770755714 | -0.1442220123 |
| H | 6.4302550985  | -0.8276553968 | 1.3485279442  |
| H | 6.4302550985  | -0.8276553968 | 1.3485279442  |

TS endo 0154

E(RB3LYP) = -706.412096069 A.U.

First frequency = -520.8418  $\text{cm}^{-1}$

|   |               |               |               |
|---|---------------|---------------|---------------|
| H | -1.9210243463 | -0.3268279068 | -2.258128272  |
| C | -1.3760878802 | -0.8737589999 | -1.4971446635 |
| H | -0.6785310207 | -1.5972067961 | -1.9038625238 |
| C | -1.9310772096 | -1.0782157977 | -0.235097733  |
| C | -1.1212544813 | -1.7077553105 | 0.736842783   |
| C | 0.1489044463  | -2.1854154804 | 0.4710196505  |
| H | 0.7594446902  | -2.5533301323 | 1.290138374   |
| H | 0.3906604395  | -2.609263876  | -0.4958721936 |
| C | 1.3273067791  | -0.4068403215 | -0.4455576902 |
| H | 1.580215612   | -0.1461568093 | 0.5775601609  |
| C | 2.3736194782  | -1.1549298688 | -1.2481366135 |
| C | 0.3810651066  | 0.3899890665  | -1.0915374927 |
| H | 0.4894191622  | 0.5108828534  | -2.1690731281 |
| C | -0.2242483101 | 1.5607549745  | -0.3543377339 |
| C | -3.3142613334 | -0.529326495  | 0.1749892836  |
| H | -1.4362959734 | -1.6624729059 | 1.7768847875  |
| C | -4.1976052438 | -1.7447376276 | 0.5495647507  |
| C | -4.0069290022 | 0.2318670123  | -0.9697086368 |
| C | -3.2357731741 | 0.4196890189  | 1.393198573   |
| H | -2.6732080529 | 1.3254795305  | 1.15320991    |
| H | -2.7600967728 | -0.0537406098 | 2.256318934   |
| H | -4.2439418439 | 0.7212495223  | 1.6993480647  |
| H | -4.9934383345 | 0.5762085239  | -0.6423944657 |
| H | -4.1517906081 | -0.40302321   | -1.849454604  |
| H | -3.434153273  | 1.1139370358  | -1.2746665991 |
| H | -4.2883225705 | -2.4343950908 | -0.2958768133 |
| H | -5.2039589729 | -1.4164900663 | 0.8349313893  |
| H | -3.7727836104 | -2.3020307738 | 1.3899604823  |
| H | -0.5110407965 | 1.2248642453  | 0.649812424   |
| H | -1.1468044877 | 1.8902487761  | -0.8475513772 |
| C | 0.7337585809  | 2.7575205385  | -0.2277768301 |
| H | 1.651231965   | 2.4332506306  | 0.2814277176  |
| C | 0.1155506515  | 3.9391011848  | 0.5279643384  |
| H | 1.0439034068  | 3.085904578   | -1.2299376064 |

|   |               |               |               |
|---|---------------|---------------|---------------|
| H | -0.1970494954 | 3.6031867537  | 1.5263030634  |
| H | -0.8023618709 | 4.2565694147  | 0.0143905442  |
| C | 1.0686695435  | 5.1301953803  | 0.6608167785  |
| H | 1.9803552855  | 4.846332711   | 1.1989206995  |
| H | 0.6048743333  | 5.9598185717  | 1.204468553   |
| H | 1.3711501971  | 5.5039133349  | -0.324159269  |
| C | 3.3622424774  | -2.0053552134 | -0.4366092815 |
| H | 2.9527298867  | -0.4280554975 | -1.8383815719 |
| H | 1.870039415   | -1.7906195753 | -1.992169843  |
| H | 2.8195583614  | -2.7566016746 | 0.1496652628  |
| C | 4.2665965086  | -1.1916049671 | 0.4983771341  |
| H | 3.9965807862  | -2.5666908433 | -1.1356467348 |
| C | 5.2734124128  | -2.0647671131 | 1.252800252   |
| H | 3.6550676665  | -0.6380571678 | 1.2217208897  |
| H | 4.8012103033  | -0.4330893035 | -0.0897817321 |
| H | 5.9110298697  | -1.4671615265 | 1.9123299241  |
| H | 5.925546972   | -2.6055164761 | 0.5573108193  |
| H | 4.7610528022  | -2.8113124274 | 1.8705949258  |
| H | 4.7610528022  | -2.8113124274 | 1.8705949258  |

TS endo 0161

E(RB3LYP) = -706.412962338 A.U.

First frequency = -507.7715  $\text{cm}^{-1}$

|   |               |               |               |
|---|---------------|---------------|---------------|
| H | -1.703521009  | -0.2341089882 | -2.1396464725 |
| C | -1.406668009  | -0.915359038  | -1.3477595188 |
| H | -0.6992396288 | -1.6699144772 | -1.6649418644 |
| C | -2.2514709537 | -1.1448874828 | -0.2651414621 |
| C | -1.7622894479 | -1.9469421361 | 0.7902798775  |
| C | -0.5229487861 | -2.5632975469 | 0.742891659   |
| H | -0.1471001067 | -3.078607435  | 1.6225906779  |
| H | -0.1422444014 | -2.9493331845 | -0.1953869593 |
| C | 1.0193339247  | -0.9612458559 | 0.4284985202  |
| H | 1.0066463122  | -0.7882074244 | 1.5033154749  |
| C | 2.1632498446  | -1.824817273  | -0.0660620034 |
| C | 0.437643386   | 0.0263127045  | -0.3699856379 |
| H | 0.8257710739  | 0.1508868032  | -1.3781081475 |
| C | -0.1833398927 | 1.2418788653  | 0.2817228233  |

|   |               |               |               |
|---|---------------|---------------|---------------|
| C | -3.6410895043 | -0.472661894  | -0.1958977571 |
| H | -2.281196639  | -1.9335944604 | 1.7430339197  |
| C | -4.5359202529 | -1.1711098124 | -1.24987957   |
| C | -3.5875709002 | 1.0361709132  | -0.5167456589 |
| C | -4.3099992839 | -0.6328405838 | 1.182447442   |
| H | -5.2940722819 | -0.1529100985 | 1.1732333781  |
| H | -3.7187562189 | -0.1633185428 | 1.9757140238  |
| H | -4.4608580723 | -1.6849738449 | 1.4432439829  |
| H | -4.6037158229 | 1.4440460102  | -0.5568602804 |
| H | -3.1171365476 | 1.2398794378  | -1.482516772  |
| H | -3.0358379393 | 1.5837945804  | 0.2512898841  |
| H | -4.1309570286 | -1.0379814765 | -2.2577791753 |
| H | -5.5516530562 | -0.7584766751 | -1.2318611513 |
| H | -4.5995597164 | -2.2465818544 | -1.0546861754 |
| H | -0.8158125527 | 0.8949977467  | 1.1091152101  |
| H | -0.8457549906 | 1.7533927239  | -0.4233647027 |
| C | 0.8483893395  | 2.2568273053  | 0.8159147595  |
| H | 0.3462657337  | 2.9665880706  | 1.4878422088  |
| C | 1.5559469295  | 3.0466193671  | -0.2932782792 |
| H | 1.592047942   | 1.728508236   | 1.4275786239  |
| H | 0.8151701462  | 3.6682872208  | -0.8141725559 |
| H | 1.9496836726  | 2.3537582105  | -1.0470689036 |
| C | 2.695489125   | 3.9230101467  | 0.232443968   |
| H | 3.1636470899  | 4.5021175779  | -0.5702769629 |
| H | 3.4748829407  | 3.3097345967  | 0.6995939233  |
| H | 2.3348630503  | 4.6298441916  | 0.988658171   |
| C | 3.5601329698  | -1.2669573536 | 0.2794421961  |
| H | 2.0810315597  | -1.9476428857 | -1.1554526925 |
| H | 2.0945027107  | -2.8324966275 | 0.3618985501  |
| H | 3.6287331565  | -1.1318467738 | 1.3684703718  |
| C | 3.9165551422  | 0.0507057649  | -0.4135638831 |
| H | 4.3124017332  | -2.0249006014 | 0.0201627972  |
| C | 5.3156593123  | 0.5569002599  | -0.0528130616 |
| H | 3.1760603102  | 0.8086130866  | -0.1448519753 |
| H | 3.837914619   | -0.0803346388 | -1.5019320434 |
| H | 6.0881990359  | -0.1661766081 | -0.3389024421 |
| H | 5.4055658967  | 0.7240594802  | 1.0269285629  |
| H | 5.5406908068  | 1.5034268548  | -0.5552792065 |

H 5.5406908068 1.5034268548 -0.5552792065

TS endo 0171

E(RB3LYP) = -706.411803250 A.U.

First frequency = -524.5903 cm<sup>-1</sup>

H -2.1012359538 -0.222829167 -2.241316508  
C -1.5282601219 -0.7928635095 -1.5187282601  
H -0.7885273343 -1.4425164222 -1.9732934793  
C -2.0803933158 -1.130853455 -0.2834422293  
C -1.2426951571 -1.786940854 0.6452708054  
C 0.0585289762 -2.1586832067 0.3606963166  
H 0.683426327 -2.5526298894 1.1566142648  
H 0.3370284952 -2.4870735619 -0.6329242815  
C 1.1142325588 -0.2383430625 -0.390869195  
H 1.3200869805 -0.0393579572 0.6552534027  
C 2.2324210051 -0.8595249725 -1.2062585402  
C 0.1365482115 0.543362989 -1.0106606762  
H 0.2657126467 0.7310651067 -2.0770309501  
C -0.5450820717 1.6547268258 -0.2437028168  
C -3.494102666 -0.6942061089 0.1556527118  
H -1.5696825908 -1.8456689434 1.6809999221  
C -4.3048432618 -1.9799784745 0.4506532072  
C -4.2327629698 0.0948531549 -0.9403135753  
C -3.4659606978 0.1784346946 1.431703229  
H -2.9695769974 -0.3258672956 2.2652306716  
H -4.4881403392 0.4115989136 1.75100327  
H -2.9459177748 1.1228258213 1.2523409232  
H -4.3345182107 -0.4890850405 -1.8605165094  
H -3.7187737156 1.0304003356 -1.1843955242  
H -5.2398744728 0.3527460863 -0.5966536792  
H -5.3275765754 -1.7288796227 0.755397523  
H -3.8474244607 -2.5650870646 1.254104934  
H -4.3582659407 -2.6179968943 -0.4374425809  
H -0.7217824822 1.3143822082 0.7842128419  
H -1.5304430242 1.8619247408 -0.6756381634  
C 0.2550185385 2.9743654096 -0.2143906738  
H 0.4325872017 3.3103629922 -1.2461340495

|   |               |               |               |
|---|---------------|---------------|---------------|
| C | 1.5935693185  | 2.9147607872  | 0.5308772736  |
| H | -0.3741350187 | 3.7466267315  | 0.2503152017  |
| H | 2.2549928385  | 2.189845559   | 0.0432502721  |
| H | 1.4232323011  | 2.5333720235  | 1.5474995573  |
| C | 2.2900203878  | 4.2768811953  | 0.6016122417  |
| H | 3.2455513082  | 4.2126931751  | 1.132476073   |
| H | 1.6678279424  | 5.0145947782  | 1.1213910711  |
| H | 2.4925734047  | 4.6673007087  | -0.4024977305 |
| C | 3.3178339777  | -1.5685985566 | -0.3838176715 |
| H | 2.7150267285  | -0.0758229304 | -1.8097890501 |
| H | 1.8069816242  | -1.5618270002 | -1.9391180986 |
| H | 2.8603047898  | -2.3370560996 | 0.2517007188  |
| C | 4.1500875066  | -0.6184324856 | 0.4880387588  |
| H | 3.9930949683  | -2.1002295756 | -1.0672078182 |
| C | 5.2349895346  | -1.3450141186 | 1.2878453396  |
| H | 3.4941811831  | -0.0727691626 | 1.1778023773  |
| H | 4.611629187   | 0.143833368   | -0.1548640774 |
| H | 5.9287272873  | -1.8725571301 | 0.6231252799  |
| H | 4.794712678   | -2.0895230638 | 1.9611141447  |
| H | 5.8205994157  | -0.6492283302 | 1.8974312187  |
| H | 5.8205994157  | -0.6492283302 | 1.8974312187  |

TS endo 0172

E(RB3LYP) = -706.413011166 A.U.

First frequency = -526.1468  $\text{cm}^{-1}$

|   |               |               |               |
|---|---------------|---------------|---------------|
| H | -1.2106275102 | 0.5859224954  | -1.8861847112 |
| C | -1.0202748851 | -0.3031260467 | -1.2969950926 |
| H | -0.2647172928 | -0.951612155  | -1.7204618699 |
| C | -1.983250536  | -0.8121710695 | -0.4338851705 |
| C | -1.6211074493 | -1.9077184235 | 0.3823982217  |
| C | -0.3894535158 | -2.5408601075 | 0.2812928649  |
| H | -0.1342698208 | -3.3192687156 | 0.9957571547  |
| H | 0.0585796634  | -2.6794250209 | -0.6966231296 |
| C | 1.1906337598  | -1.0587045993 | 0.590437      |
| H | 1.1481009165  | -1.2563689303 | 1.6600152786  |
| C | 2.3346200691  | -1.7260570747 | -0.1439598219 |
| C | 0.7222635836  | 0.1888676648  | 0.1724988242  |

|   |               |               |               |
|---|---------------|---------------|---------------|
| H | 1.196198881   | 0.6474471776  | -0.6916841017 |
| C | 0.061735798   | 1.0969892751  | 1.1797831082  |
| C | -3.3731627635 | -0.1639067393 | -0.2439729926 |
| H | -2.254211503  | -2.1515416823 | 1.2325183394  |
| C | -4.4377834336 | -1.2624808825 | -0.4842691967 |
| C | -3.6376207003 | 0.968938435   | -1.2530972556 |
| C | -3.5587248718 | 0.4065803884  | 1.1800696154  |
| H | -3.3722145635 | -0.3476108334 | 1.9499048966  |
| H | -4.5847609625 | 0.7688219161  | 1.3120888002  |
| H | -2.8828652319 | 1.2468979835  | 1.3594042527  |
| H | -2.9550441809 | 1.8123793917  | -1.1134836337 |
| H | -4.6558855441 | 1.3501376087  | -1.1225542419 |
| H | -3.5408863326 | 0.6175659622  | -2.2851980848 |
| H | -4.3355989173 | -1.6895679538 | -1.4871063377 |
| H | -5.4464594828 | -0.8437193388 | -0.3909963456 |
| H | -4.3467742683 | -2.0801258433 | 0.236412405   |
| H | 0.7587398837  | 1.2659313338  | 2.0156239722  |
| H | -0.7856012918 | 0.5507359098  | 1.615503568   |
| C | -0.3978849418 | 2.4582059602  | 0.6477253385  |
| H | -1.0622241171 | 2.3064133226  | -0.2103368608 |
| C | 0.7491806987  | 3.3907688147  | 0.2368582403  |
| H | -0.9996207688 | 2.9601228097  | 1.417518211   |
| H | 1.3615184093  | 2.9092423647  | -0.5361576716 |
| H | 1.4142343238  | 3.5440388714  | 1.0977152404  |
| C | 0.2527697239  | 4.7436143316  | -0.2810424422 |
| H | -0.3360674766 | 5.2655106613  | 0.4820775555  |
| H | -0.3891469239 | 4.6159334101  | -1.1603854242 |
| H | 1.0836603936  | 5.39699183    | -0.5664499825 |
| C | 3.7029581441  | -1.1163197151 | 0.2061883273  |
| H | 2.1724390311  | -1.637970781  | -1.228372838  |
| H | 2.3578400454  | -2.8012980838 | 0.0761427176  |
| H | 3.6907121917  | -0.0453908374 | -0.0368026095 |
| C | 4.8717638316  | -1.796038579  | -0.5155230917 |
| H | 3.8581498011  | -1.1780398604 | 1.292547202   |
| C | 6.2292560553  | -1.1802662242 | -0.1644937447 |
| H | 4.7094204342  | -1.7367418557 | -1.6005457215 |
| H | 4.8770887855  | -2.8663324058 | -0.2678640083 |
| H | 6.4292418575  | -1.2553064941 | 0.9105118337  |



|   |              |               |               |
|---|--------------|---------------|---------------|
| H | 6.260186017  | -0.1176851452 | -0.4313402195 |
| H | 7.0477921966 | -1.6808546159 | -0.6919552113 |
| H | 7.0477921966 | -1.6808546159 | -0.6919552113 |

TS endo 0186

E(RB3LYP) = -706.411572498 A.U.

First frequency = -529.0083 cm<sup>-1</sup>

|   |               |               |               |
|---|---------------|---------------|---------------|
| H | -1.1211665907 | -0.704282021  | -2.1379211992 |
| C | -0.8638040674 | -1.0477598579 | -1.1426954654 |
| H | 0.0237649099  | -1.6653763153 | -1.1128991084 |
| C | -1.838411544  | -1.1831438214 | -0.1578639566 |
| C | -1.4074473744 | -1.5190792593 | 1.1444198609  |
| C | -0.0769361835 | -1.7356366958 | 1.4613190838  |
| H | 0.2101682467  | -1.8652921316 | 2.5013528854  |
| H | 0.5815819811  | -2.2270364935 | 0.7552093689  |
| C | 1.0373402492  | 0.1113525324  | 0.840738209   |
| H | 0.6968194932  | 0.5876049413  | 1.7565060323  |
| C | 2.4570453958  | -0.4278566615 | 0.9206173259  |
| C | 0.4627774645  | 0.5829333773  | -0.3443524736 |
| H | 1.0471211132  | 0.5042647455  | -1.2585320102 |
| C | -0.5027664256 | 1.7479570327  | -0.3072960262 |
| C | -3.3243850358 | -0.8358910444 | -0.390825904  |
| H | -2.1116181079 | -1.4068405784 | 1.9655974667  |
| C | -3.606369017  | -0.4067133643 | -1.8419339552 |
| C | -3.8101146216 | 0.2971768348  | 0.5420099909  |
| C | -4.1509515313 | -2.1117734069 | -0.0984624858 |
| H | -4.022198559  | -2.4441272216 | 0.9359477454  |
| H | -3.8423633186 | -2.9331133298 | -0.7532996464 |
| H | -5.2185854553 | -1.9243529055 | -0.2623247216 |
| H | -4.8825116421 | 0.4713659831  | 0.3974427439  |
| H | -3.2860040335 | 1.232724928   | 0.3301506628  |
| H | -3.6559756188 | 0.0566987817  | 1.5974524106  |
| H | -3.3249806331 | -1.1868472142 | -2.5563138484 |
| H | -3.0682343256 | 0.5094478738  | -2.1065902477 |
| H | -4.6756718078 | -0.2081526692 | -1.9689149015 |
| H | -1.1113436056 | 1.674490028   | 0.6024196692  |
| H | -1.1989212062 | 1.6936235074  | -1.1514892131 |

|   |               |               |               |
|---|---------------|---------------|---------------|
| C | 0.1901410424  | 3.1268982361  | -0.3457487426 |
| H | 0.7976864921  | 3.1978163215  | -1.2594635587 |
| C | 1.0695370936  | 3.450050422   | 0.8672619852  |
| H | -0.5855196307 | 3.9002667112  | -0.4381410668 |
| H | 1.8784941199  | 2.7140600392  | 0.9398764177  |
| H | 0.4742880919  | 3.3382664611  | 1.7841838102  |
| C | 1.6632231805  | 4.8604987713  | 0.8064582062  |
| H | 2.2833155282  | 4.9877066832  | -0.0885339618 |
| H | 2.2906688578  | 5.0714387334  | 1.6787122203  |
| H | 0.8748797897  | 5.6212481194  | 0.7703782645  |
| C | 2.978199112   | -1.1673163114 | -0.318066881  |
| H | 2.5507744765  | -1.090024202  | 1.7915343567  |
| H | 3.1330726764  | 0.4173884322  | 1.1264122278  |
| H | 2.2994143193  | -1.9901836076 | -0.580133384  |
| C | 4.3904407201  | -1.7302536862 | -0.1213748405 |
| H | 2.9820834096  | -0.4918194566 | -1.1830771516 |
| C | 4.9220187289  | -2.454528539  | -1.3612421482 |
| H | 4.3894653068  | -2.41760922   | 0.7353793293  |
| H | 5.0708030774  | -0.9107963794 | 0.1476864369  |
| H | 4.9642670229  | -1.7798694764 | -2.2239848001 |
| H | 4.2749357271  | -3.2963878405 | -1.6331225531 |
| H | 5.9300101052  | -2.8485116443 | -1.1961723379 |
| H | 5.9300101052  | -2.8485116443 | -1.1961723379 |

TS endo 0190

E(RB3LYP) = -706.412137437 A.U.

First frequency = -506.8453 cm<sup>-1</sup>

|   |               |               |               |
|---|---------------|---------------|---------------|
| H | -2.0614704712 | -0.7254844043 | -2.1451407328 |
| C | -1.6119007656 | -1.1854177119 | -1.2701469426 |
| H | -0.9066754321 | -1.9718399615 | -1.5048323274 |
| C | -2.2787923952 | -1.1737827648 | -0.0482931469 |
| C | -1.5955280006 | -1.6873682813 | 1.0766647479  |
| C | -0.3349243308 | -2.2531673791 | 0.9886064771  |
| H | 0.1924002497  | -2.5286355805 | 1.8978408666  |
| H | -0.0559079343 | -2.836464145  | 0.118942075   |
| C | 1.0148415639  | -0.7009413537 | 0.0884145155  |
| H | 1.1103177043  | -0.2659192159 | 1.0788572436  |

|   |               |               |               |
|---|---------------|---------------|---------------|
| C | 2.1366370438  | -1.620750796  | -0.3570756468 |
| C | 0.291320727   | 0.0279662176  | -0.8580147702 |
| H | 0.5538717749  | -0.1287032555 | -1.9042863107 |
| C | -0.2979070452 | 1.3837069639  | -0.5424435715 |
| C | -3.6854925006 | -0.5461473289 | 0.0744803924  |
| H | -1.9767861534 | -1.4641256144 | 2.0676238838  |
| C | -4.1433254297 | -0.397909765  | 1.53798417    |
| C | -4.6739225229 | -1.4966147279 | -0.645606536  |
| C | -3.771339735  | 0.8466769239  | -0.5846630399 |
| H | -4.803786789  | 1.2119962825  | -0.5502678238 |
| H | -3.4683384393 | 0.8287051031  | -1.6351728238 |
| H | -3.1405841454 | 1.5700976578  | -0.0618501517 |
| H | -4.4222346808 | -1.5934913568 | -1.7062020695 |
| H | -5.7006169931 | -1.118946299  | -0.5707855516 |
| H | -4.6439190092 | -2.4973163239 | -0.2023532938 |
| H | -3.4792105421 | 0.2635813975  | 2.1042743521  |
| H | -4.18701867   | -1.3630603814 | 2.0521317227  |
| H | -5.1483749019 | 0.0354174845  | 1.5681253807  |
| H | -0.7113867299 | 1.3666416788  | 0.4750058733  |
| H | -1.1364565264 | 1.5833390814  | -1.2143902367 |
| C | 0.6978928105  | 2.5576273024  | -0.6755364028 |
| H | 1.1374345424  | 2.5401029259  | -1.6833143072 |
| C | 1.8234525915  | 2.5893037998  | 0.3619571473  |
| H | 0.1297759717  | 3.4964370719  | -0.6108967037 |
| H | 2.4156754186  | 1.67420802    | 0.2820950627  |
| H | 1.3862145257  | 2.5843148257  | 1.3702363819  |
| C | 2.7455040475  | 3.8015210533  | 0.2033125108  |
| H | 2.1916437021  | 4.7413438906  | 0.3103936245  |
| H | 3.2162196157  | 3.8086366083  | -0.7868220087 |
| H | 3.545367951   | 3.7973601706  | 0.9512268632  |
| C | 3.4770030665  | -0.8905090604 | -0.5822219413 |
| H | 1.8345665017  | -2.1101170239 | -1.2930528446 |
| H | 2.2975691499  | -2.4255265955 | 0.3719392615  |
| H | 4.1598192126  | -1.5471802842 | -1.1387484365 |
| C | 4.1671528549  | -0.4558342488 | 0.7176135332  |
| H | 3.3028130264  | -0.0144193313 | -1.2212615363 |
| C | 5.4032321885  | 0.4128705285  | 0.4708325563  |
| H | 4.4465153294  | -1.3517169112 | 1.288424107   |

|   |              |               |               |
|---|--------------|---------------|---------------|
| H | 3.4597608673 | 0.0947762737  | 1.3495175272  |
| H | 5.899876381  | 0.6840883433  | 1.4081142195  |
| H | 5.1295468804 | 1.3417602626  | -0.0428999414 |
| H | 6.1349315662 | -0.1083885516 | -0.1571740016 |
| H | 6.1349315662 | -0.1083885516 | -0.1571740016 |

TS endo 0200

E(RB3LYP) = -706.413165803 A.U.

First frequency = -523.9804  $\text{cm}^{-1}$

|   |               |               |               |
|---|---------------|---------------|---------------|
| H | -0.9757168594 | -0.0050130922 | -2.0267090941 |
| C | -0.8021198688 | -0.6633684249 | -1.1839658685 |
| H | -0.0800779602 | -1.4439736008 | -1.3838383513 |
| C | -1.7617767563 | -0.8290520831 | -0.1924996309 |
| C | -1.4193068425 | -1.617215718  | 0.9299650424  |
| C | -0.2145231433 | -2.2982172287 | 1.0266602286  |
| H | 0.0317591813  | -2.8124552321 | 1.9520008994  |
| H | 0.2107557197  | -2.7583584788 | 0.1415732988  |
| C | 1.4229796048  | -0.8485954243 | 0.8247699231  |
| H | 1.3849370543  | -0.676685398  | 1.8989185859  |
| C | 2.5286607733  | -1.7707941281 | 0.3548732945  |
| C | 0.9982793856  | 0.2048346914  | 0.0126808191  |
| H | 1.4754064599  | 0.3252922256  | -0.9583248079 |
| C | 0.4258675461  | 1.4467894645  | 0.6491136676  |
| C | -3.125095051  | -0.1020678929 | -0.2067336156 |
| H | -2.0403991177 | -1.54704598   | 1.8201124623  |
| C | -3.251539894  | 0.9093530793  | 0.9538305202  |
| C | -4.2310912382 | -1.1755236126 | -0.0571100521 |
| C | -3.3809110015 | 0.6465192747  | -1.5280280764 |
| H | -4.3832796555 | 1.0872954818  | -1.5153747912 |
| H | -3.3211784751 | -0.0271779047 | -2.3885830175 |
| H | -2.6697146627 | 1.4630234382  | -1.6843072684 |
| H | -4.1476060784 | -1.7151380358 | 0.890460713   |
| H | -4.1703978746 | -1.9110329447 | -0.8657083553 |
| H | -5.222502449  | -0.7092469519 | -0.0912571312 |
| H | -4.2580013789 | 1.3429890571  | 0.9729651466  |
| H | -2.5373158957 | 1.7282798252  | 0.8390913969  |
| H | -3.0736066696 | 0.440454415   | 1.9257571388  |

|   |               |               |               |
|---|---------------|---------------|---------------|
| H | 1.1786314209  | 1.8679056928  | 1.3341049436  |
| H | -0.4175051339 | 1.152908852   | 1.2897218825  |
| C | -0.0048200392 | 2.5382402804  | -0.3316702122 |
| H | 0.8305311857  | 2.7680587404  | -1.0085576185 |
| C | -0.4644942021 | 3.8290980397  | 0.353866254   |
| H | -0.8106677658 | 2.1557543695  | -0.9674390335 |
| H | 0.362847767   | 4.2379538005  | 0.9495921204  |
| H | -1.2642560376 | 3.5974191834  | 1.070237639   |
| C | -0.9591342992 | 4.8848112153  | -0.6386472748 |
| H | -0.1727289463 | 5.153036092   | -1.3535084535 |
| H | -1.2750231946 | 5.8014606083  | -0.1301163306 |
| H | -1.8136015684 | 4.5108500847  | -1.2145461007 |
| C | 3.9246817789  | -1.1374888697 | 0.5022208852  |
| H | 2.3520067617  | -2.0321908055 | -0.6971065115 |
| H | 2.5089524445  | -2.7150967409 | 0.9150025648  |
| H | 3.9662147492  | -0.2226677285 | -0.1042762724 |
| C | 5.0834847477  | -2.0678306725 | 0.1121616075  |
| H | 4.0546575439  | -0.817266899  | 1.5445434812  |
| C | 5.098710243   | -2.4588052955 | -1.3701844815 |
| H | 5.0417933561  | -2.9754358954 | 0.7300913017  |
| H | 6.0310074115  | -1.5734303109 | 0.3616445934  |
| H | 5.9784617843  | -3.0642466482 | -1.6113568781 |
| H | 5.1208739496  | -1.5683488593 | -2.0094713492 |
| H | 4.2143191662  | -3.0417591538 | -1.6466109853 |
| H | 4.2143191662  | -3.0417591538 | -1.6466109853 |

TS endo 0204

E(RB3LYP) = -706.412073248 A.U.

First frequency = -505.8122  $\text{cm}^{-1}$

|   |               |               |               |
|---|---------------|---------------|---------------|
| H | -1.7121352632 | -0.8384967907 | -2.1948611877 |
| C | -1.3681869645 | -1.1562308377 | -1.2151368691 |
| H | -0.6125810602 | -1.9301852221 | -1.2482049384 |
| C | -2.1893566188 | -1.0140473147 | -0.1005655249 |
| C | -1.644753793  | -1.3412318046 | 1.1618282482  |
| C | -0.369270616  | -1.8585155201 | 1.312974495   |
| H | 0.0401914052  | -1.9871521158 | 2.3112187968  |
| H | 0.036536567   | -2.5403755285 | 0.5748183992  |

|   |               |               |               |
|---|---------------|---------------|---------------|
| C | 1.0459927394  | -0.384126772  | 0.381517396   |
| H | 1.018483918   | 0.1680855875  | 1.3162083993  |
| C | 2.2355578057  | -1.3022335148 | 0.1938561975  |
| C | 0.422438752   | 0.1945537469  | -0.7250645552 |
| H | 0.8187472504  | -0.0682682681 | -1.705672416  |
| C | -0.2586203825 | 1.5396338179  | -0.6389577131 |
| C | -3.6178731008 | -0.4423703858 | -0.2429706011 |
| H | -2.1585551475 | -1.0051917958 | 2.0564482959  |
| C | -4.4784742762 | -1.5335488697 | -0.9268452438 |
| C | -3.6618730344 | 0.8347898245  | -1.1085238726 |
| C | -4.2608270011 | -0.1059211399 | 1.1160241825  |
| H | -3.6902872276 | 0.6579707646  | 1.6548254883  |
| H | -4.3451672202 | -0.9882823275 | 1.7579319927  |
| H | -5.272173813  | 0.2833277852  | 0.9595993461  |
| H | -3.2230544297 | 0.6820878449  | -2.0983003724 |
| H | -3.1298660572 | 1.6579941526  | -0.6252337696 |
| H | -4.7014539855 | 1.1468815635  | -1.2582632791 |
| H | -4.0921036832 | -1.7694557885 | -1.923176935  |
| H | -5.517511822  | -1.1995943739 | -1.0328076578 |
| H | -4.4737849744 | -2.4574162078 | -0.339273201  |
| H | -0.8607603385 | 1.5750379729  | 0.2771739214  |
| H | -0.9620665253 | 1.645082899   | -1.4693951251 |
| C | 0.7033266134  | 2.7499290357  | -0.6892711926 |
| H | 1.303867727   | 2.6787708145  | -1.6062310542 |
| C | 1.6455054561  | 2.9298734461  | 0.5102321404  |
| H | 0.0940360846  | 3.658975343   | -0.794417227  |
| H | 2.297156419   | 3.7899084532  | 0.3090243976  |
| H | 2.3076448289  | 2.0613497169  | 0.5911497692  |
| C | 0.9230486253  | 3.1537600374  | 1.8430662911  |
| H | 0.3226767754  | 2.2852976296  | 2.1332286543  |
| H | 0.2455279589  | 4.0137784967  | 1.7837920375  |
| H | 1.6353302051  | 3.3452637295  | 2.6523259346  |
| C | 3.5503706874  | -0.5416023043 | -0.0526131164 |
| H | 2.04683799    | -1.9687666524 | -0.6605972218 |
| H | 2.3640622042  | -1.9536296921 | 1.0677485273  |
| H | 3.4286352264  | 0.1121397244  | -0.9266199417 |
| C | 4.7546620699  | -1.466047757  | -0.2626730634 |
| H | 3.7474904531  | 0.1240504054  | 0.799380492   |

|   |              |               |               |
|---|--------------|---------------|---------------|
| C | 6.0586979842 | -0.7004157054 | -0.5043924841 |
| H | 4.5542439689 | -2.1315661217 | -1.1135487756 |
| H | 4.8670678524 | -2.119227107  | 0.6134446932  |
| H | 6.2974979601 | -0.0516133919 | 0.3460626768  |
| H | 5.9817558199 | -0.0630546566 | -1.3926817663 |
| H | 6.9039733632 | -1.3801956282 | -0.6533465795 |
| H | 6.9039733632 | -1.3801956282 | -0.6533465795 |

TS endo 0209

E(RB3LYP) = -706.411710229 A.U.

First frequency = -520.0747 cm<sup>-1</sup>

|   |               |               |               |
|---|---------------|---------------|---------------|
| H | -2.0398514068 | -0.1622752864 | -2.0644921727 |
| C | -1.4616223602 | -0.7543313834 | -1.3643508816 |
| H | -0.7183834694 | -1.3821525616 | -1.8424587591 |
| C | -2.0006766612 | -1.1294277128 | -0.1354130365 |
| C | -1.1510717621 | -1.8078533024 | 0.7673114     |
| C | 0.1466957482  | -2.173029244  | 0.4579311834  |
| H | 0.7796644301  | -2.589353209  | 1.2358437201  |
| H | 0.4114796194  | -2.4769610958 | -0.5473559887 |
| C | 1.2134909744  | -0.2439098555 | -0.251303665  |
| H | 1.4552015313  | -0.080515609  | 0.7944358191  |
| C | 2.3006125635  | -0.8360414514 | -1.127084395  |
| C | 0.2216040513  | 0.5626009048  | -0.8107615344 |
| H | 0.3152164655  | 0.7972666269  | -1.8695444901 |
| C | -0.453435828  | 1.604170737   | 0.0526103566  |
| C | -3.4170534045 | -0.7199691307 | 0.3214042744  |
| H | -1.4671049806 | -1.8961093392 | 1.8042239592  |
| C | -3.4038047325 | 0.0823772765  | 1.6428683797  |
| C | -4.2219352047 | -2.0243828133 | 0.5416713102  |
| C | -4.1523784139 | 0.125707378   | -0.7339274129 |
| H | -3.6328129458 | 1.0695874447  | -0.9297001577 |
| H | -5.1585863517 | 0.3701066949  | -0.3779770012 |
| H | -4.257073815  | -0.4104984938 | -1.6823464018 |
| H | -4.265189874  | -2.6144580778 | -0.3794938649 |
| H | -5.2482690859 | -1.7964090311 | 0.8524950374  |
| H | -3.7646164699 | -2.6481367996 | 1.3157322762  |
| H | -2.9034999968 | -0.45820073   | 2.4508525554  |

|   |               |               |               |
|---|---------------|---------------|---------------|
| H | -4.43027341   | 0.2832430545  | 1.9699755104  |
| H | -2.89831713   | 1.0432450914  | 1.516414696   |
| H | -0.7618584166 | 1.1207251667  | 0.9866915868  |
| H | -1.3693949844 | 1.9643806069  | -0.4318869148 |
| C | 0.4480577977  | 2.8082820969  | 0.3893615714  |
| H | -0.0898848321 | 3.4718971277  | 1.081078343   |
| C | 0.8938646836  | 3.6159379719  | -0.8348190841 |
| H | 1.3363599898  | 2.4528985752  | 0.9289109864  |
| H | 0.0063388673  | 3.9411374196  | -1.3955852004 |
| H | 1.4610143584  | 2.965008545   | -1.5122100159 |
| C | 1.745537324   | 4.8335551674  | -0.4652945329 |
| H | 1.1922490513  | 5.5190728007  | 0.1869685455  |
| H | 2.0551981172  | 5.3946482771  | -1.3531497746 |
| H | 2.6522484042  | 4.5301141751  | 0.0707418162  |
| C | 3.3467151646  | -1.6989407669 | -0.4060752104 |
| H | 2.8279619095  | -0.01639195   | -1.6390551063 |
| H | 1.8345662179  | -1.4232567583 | -1.9328292737 |
| H | 2.8563145746  | -2.5370681946 | 0.1036482637  |
| C | 4.2054054155  | -0.9258632724 | 0.6035885636  |
| H | 4.0095759914  | -2.1474476219 | -1.1580962752 |
| C | 5.2695753948  | -1.8040276422 | 1.2680728982  |
| H | 3.5658000686  | -0.4846111147 | 1.3780771315  |
| H | 4.6878852016  | -0.0816853136 | 0.0920315372  |
| H | 5.8735250077  | -1.2350305554 | 1.9823147103  |
| H | 5.9491094154  | -2.232690097  | 0.5224931513  |
| H | 4.8087199473  | -2.6377075095 | 1.8103664755  |
| H | 4.8087199473  | -2.6377075095 | 1.8103664755  |

TS endo 0211

E(RB3LYP) = -706.411550681 A.U.

First frequency = -520.1753  $\text{cm}^{-1}$

|   |               |               |               |
|---|---------------|---------------|---------------|
| H | -1.5136449733 | -0.1595070772 | -2.1570754455 |
| C | -1.0804648291 | -0.705751017  | -1.3269880812 |
| H | -0.2086166507 | -1.2880589385 | -1.6024454583 |
| C | -1.8675826754 | -1.1013518628 | -0.2477032273 |
| C | -1.2125189383 | -1.7133889802 | 0.8446498398  |
| C | 0.1413381912  | -1.996536853  | 0.853705146   |



|   |               |               |               |
|---|---------------|---------------|---------------|
| H | 0.6001066925  | -2.3625005061 | 1.7671741188  |
| H | 0.6501915627  | -2.29414979   | -0.055159952  |
| C | 1.2276200233  | -0.0138565974 | 0.366931105   |
| H | 1.2205033805  | 0.1767602375  | 1.4374245913  |
| C | 2.5227432342  | -0.5440044166 | -0.2142724257 |
| C | 0.3469281915  | 0.7228784681  | -0.4262323121 |
| H | 0.6685744791  | 0.9502359219  | -1.4408394311 |
| C | -0.5730070076 | 1.7269054008  | 0.2304518375  |
| C | -3.3735852677 | -0.7798806826 | -0.1428405049 |
| H | -1.7553657559 | -1.8102694724 | 1.7820910871  |
| C | -3.8934062512 | 0.0003080733  | -1.3637112341 |
| C | -3.7168350609 | 0.0400316016  | 1.1220661679  |
| C | -4.1265631229 | -2.1313774269 | -0.0768756157 |
| H | -5.2089886949 | -1.9672400646 | -0.0190551253 |
| H | -3.8252050409 | -2.7124778685 | 0.7999865125  |
| H | -3.9179869768 | -2.7361415724 | -0.9653320579 |
| H | -3.3851045068 | -0.4545882003 | 2.0389359136  |
| H | -4.8015746641 | 0.1765037719  | 1.1976787917  |
| H | -3.2560453358 | 1.0306006046  | 1.087720767   |
| H | -3.7403589001 | -0.5545403758 | -2.2946788056 |
| H | -3.4020657492 | 0.9741567978  | -1.4607727914 |
| H | -4.9680312005 | 0.1816282075  | -1.2579553221 |
| H | -1.0566465706 | 1.2350650923  | 1.0822733743  |
| H | -1.374046698  | 2.0169879629  | -0.4606421524 |
| C | 0.1469393595  | 2.995085298   | 0.7295269746  |
| H | -0.57703279   | 3.6272677443  | 1.2628655512  |
| C | 0.8050588289  | 3.8178030114  | -0.3840212226 |
| H | 0.9103390017  | 2.7097352127  | 1.4658818024  |
| H | 0.0488924153  | 4.0717594056  | -1.1400893213 |
| H | 1.5540068971  | 3.2011924087  | -0.8970063936 |
| C | 1.4663905377  | 5.0978138157  | 0.134304393   |
| H | 1.9321211159  | 5.6686571877  | -0.675777424  |
| H | 2.2451301472  | 4.8668935516  | 0.8703385608  |
| H | 0.7342096572  | 5.7498869359  | 0.6244202695  |
| C | 3.3960579415  | -1.3286911345 | 0.7729810469  |
| H | 3.1137205342  | 0.3026751361  | -0.5971395739 |
| H | 2.2986028194  | -1.1599044926 | -1.0975271716 |
| H | 3.5432128782  | -0.7130586736 | 1.6706464359  |

|   |              |               |               |
|---|--------------|---------------|---------------|
| C | 4.7675024233 | -1.7316969944 | 0.2108519938  |
| H | 2.8669059414 | -2.2301447658 | 1.1045924473  |
| C | 4.6947126424 | -2.721739559  | -0.9576324424 |
| H | 5.3628682967 | -2.1755371447 | 1.0187435521  |
| H | 5.3086719516 | -0.8296214957 | -0.1064096394 |
| H | 4.141712179  | -3.6242841916 | -0.6717434939 |
| H | 5.6948492124 | -3.0309597949 | -1.2781147515 |
| H | 4.1913555618 | -2.2880818615 | -1.8276901903 |
| H | 4.1913555618 | -2.2880818615 | -1.8276901903 |

TS endo 0224

E(RB3LYP) = -706.411754445 A.U.

First frequency = -522.1627 cm<sup>-1</sup>

|   |               |               |               |
|---|---------------|---------------|---------------|
| H | -1.4513693136 | -0.8017415245 | -2.1302405099 |
| C | -0.986325433  | -1.0596248449 | -1.185554349  |
| H | -0.1879131984 | -1.7864957409 | -1.2831292922 |
| C | -1.7026856092 | -0.9706736665 | 0.0065754325  |
| C | -1.0002388732 | -1.2208649083 | 1.2068104589  |
| C | 0.3251330062  | -1.6143630595 | 1.2404414554  |
| H | 0.835521176   | -1.6776651455 | 2.1966397356  |
| H | 0.7310413685  | -2.2592932252 | 0.4705202643  |
| C | 1.5002629592  | -0.0422115534 | 0.0071851265  |
| H | 1.5990553134  | 0.5107912292  | 0.9381487643  |
| C | 2.69805721    | -0.8658402198 | -0.419306161  |
| C | 0.6029973573  | 0.4483923111  | -0.9426341345 |
| H | 0.8539598553  | 0.2865735136  | -1.9905068299 |
| C | -0.1842360065 | 1.69942996    | -0.6347132918 |
| C | -3.1649332266 | -0.480949262  | 0.0755228055  |
| H | -1.464033097  | -0.9269321662 | 2.1457443289  |
| C | -3.3264310101 | 0.7756298194  | 0.9622441076  |
| C | -4.0058231743 | -1.6294821694 | 0.6850430519  |
| C | -3.739738777  | -0.1514931614 | -1.3139473228 |
| H | -3.1926537858 | 0.6659170866  | -1.7953290276 |
| H | -4.7843757712 | 0.1623981996  | -1.2183562562 |
| H | -3.7129834306 | -1.0198281197 | -1.9797506656 |
| H | -3.6689972293 | -1.8771714014 | 1.6961836276  |
| H | -3.9252018826 | -2.5353866431 | 0.0755939311  |

|   |               |               |               |
|---|---------------|---------------|---------------|
| H | -5.0632404562 | -1.3454381168 | 0.7404875582  |
| H | -2.9331706252 | 0.6241541158  | 1.9710806685  |
| H | -4.3871093853 | 1.0338414927  | 1.0585127091  |
| H | -2.8115980882 | 1.6348649448  | 0.5249851272  |
| H | -0.5861487424 | 1.6022130713  | 0.3794413154  |
| H | -1.047470908  | 1.785943118   | -1.3062358895 |
| C | 0.6599659843  | 2.9827348288  | -0.7383173323 |
| H | 1.5002867294  | 2.9172779497  | -0.0339938361 |
| C | -0.1346072348 | 4.2707998226  | -0.4723371967 |
| H | 1.1062937634  | 3.0343073589  | -1.7404426421 |
| H | -0.9675837211 | 4.3348558288  | -1.1861795276 |
| H | 0.5109621401  | 5.1337393819  | -0.6800705698 |
| C | -0.6775051177 | 4.3852691257  | 0.9570494849  |
| H | -1.4065210892 | 3.6000506569  | 1.1810866547  |
| H | -1.1736885126 | 5.3481893471  | 1.1163040281  |
| H | 0.1328225964  | 4.301682417   | 1.6908955923  |
| C | 3.6007849244  | -1.3274423869 | 0.7318622272  |
| H | 3.3084994066  | -0.2725088756 | -1.1178461473 |
| H | 2.3534939795  | -1.7316050052 | -1.0037923722 |
| H | 3.8725172508  | -0.4489435848 | 1.3325780381  |
| C | 4.8832071314  | -2.0386071291 | 0.2748605233  |
| H | 3.0417975175  | -1.9931191047 | 1.4005207173  |
| C | 4.6345184886  | -3.3705347945 | -0.4427270527 |
| H | 5.5179916883  | -2.2183670527 | 1.1517296196  |
| H | 5.454451315   | -1.3690386172 | -0.3828774502 |
| H | 5.5769839925  | -3.8712952216 | -0.6869067791 |
| H | 4.085008549   | -3.2319091401 | -1.379339286  |
| H | 4.0484079106  | -4.0504905418 | 0.186777624   |
| H | 4.0484079106  | -4.0504905418 | 0.186777624   |

TS endo 0246

E(RB3LYP) = -706.413014618 A.U.

First frequency = -525.7408 cm<sup>-1</sup>

|   |               |               |               |
|---|---------------|---------------|---------------|
| H | -1.3204657725 | 0.2297939801  | -2.031017493  |
| C | -1.1352078457 | -0.5866915857 | -1.3432759651 |
| H | -0.4357940292 | -1.3213376164 | -1.7196968115 |
| C | -2.0691060814 | -0.9345875535 | -0.3738513476 |

|   |               |               |               |
|---|---------------|---------------|---------------|
| C | -1.7068751794 | -1.932457184  | 0.5589139155  |
| C | -0.5081328917 | -2.6288813319 | 0.4796028806  |
| H | -0.2439573584 | -3.3215854132 | 1.2745167541  |
| H | -0.1203794866 | -2.9098308267 | -0.4935856456 |
| C | 1.1448050553  | -1.1969702977 | 0.5230129207  |
| H | 1.1411784781  | -1.2421143559 | 1.6110976222  |
| C | 2.2344448699  | -2.0132695574 | -0.1430134554 |
| C | 0.7005520653  | 0.000534249   | -0.044910794  |
| H | 1.1450383869  | 0.3108214574  | -0.9856203078 |
| C | 0.1397779149  | 1.0715937273  | 0.8572493472  |
| C | -3.4180617014 | -0.2006281317 | -0.200465245  |
| H | -2.3009071112 | -2.035739688  | 1.4641498217  |
| C | -4.5386360391 | -1.2690753162 | -0.2294347773 |
| C | -3.6963516272 | 0.7960138112  | -1.3409767837 |
| C | -3.495545576  | 0.5659915096  | 1.1389505065  |
| H | -2.7806044366 | 1.3928858654  | 1.1621755231  |
| H | -3.2885824361 | -0.0840638695 | 1.9938731705  |
| H | -4.4979862241 | 0.987281274   | 1.2768894356  |
| H | -2.9734152335 | 1.6170257513  | -1.355903452  |
| H | -4.688992227  | 1.2397154644  | -1.2105655493 |
| H | -3.6744805648 | 0.3035433175  | -2.3182238226 |
| H | -4.5126714349 | -1.8337756257 | -1.1669509361 |
| H | -5.5221903213 | -0.7930592493 | -0.1429198937 |
| H | -4.4394456543 | -1.9838446278 | 0.5923928692  |
| H | 0.8746289468  | 1.2917913499  | 1.645002339   |
| H | -0.7236163805 | 0.6479393864  | 1.3869640214  |
| C | -0.2590078007 | 2.3798513629  | 0.164018761   |
| H | -1.0262389388 | 2.1630557286  | -0.5867052834 |
| C | 0.897021867   | 3.1370795596  | -0.5126659799 |
| H | -0.7276936883 | 3.0427058669  | 0.9040535586  |
| H | 0.483078053   | 4.0153794411  | -1.0240836399 |
| H | 1.3386378879  | 2.5141439844  | -1.3010599713 |
| C | 1.9993630415  | 3.590675435   | 0.4506479061  |
| H | 2.5106794121  | 2.7398511457  | 0.9122906142  |
| H | 1.5869570014  | 4.2063223084  | 1.2586716423  |
| H | 2.7580321597  | 4.1850809002  | -0.0687457063 |
| C | 3.6619588924  | -1.5493231373 | 0.2165588411  |
| H | 2.1053817381  | -1.9681827223 | -1.2341728225 |

|   |              |               |               |
|---|--------------|---------------|---------------|
| H | 2.1413875498 | -3.0706449483 | 0.1343232713  |
| H | 3.7875970736 | -1.5953204852 | 1.3077471109  |
| C | 4.0305882179 | -0.1444287511 | -0.2727594887 |
| H | 4.3774773454 | -2.2710383449 | -0.2016394579 |
| C | 5.4743405396 | 0.2399546638  | 0.0626451782  |
| H | 3.345111435  | 0.5877808793  | 0.1682028631  |
| H | 3.8753094485 | -0.0881298069 | -1.3593514487 |
| H | 5.7131929289 | 1.2483787953  | -0.2906910707 |
| H | 6.1876934457 | -0.453502111  | -0.3974244541 |
| H | 5.6453513518 | 0.2172722184  | 1.1451576674  |
| H | 5.6453513518 | 0.2172722184  | 1.1451576674  |

TS endo 0256

E(RB3LYP) = -706.412425830 A.U.

First frequency = -503.5530  $\text{cm}^{-1}$

|   |               |               |               |
|---|---------------|---------------|---------------|
| H | -1.184918526  | -0.7316597545 | -2.1068269548 |
| C | -1.0122099439 | -1.1851011435 | -1.1352833076 |
| H | -0.358591878  | -2.0467888303 | -1.1665442601 |
| C | -1.947467828  | -1.0392552102 | -0.1150720891 |
| C | -1.6135935237 | -1.5510899205 | 1.1593557479  |
| C | -0.4413661145 | -2.2493261202 | 1.3982914325  |
| H | -0.1819161151 | -2.5257258919 | 2.4165946612  |
| H | -0.0349599144 | -2.9097196889 | 0.641213082   |
| C | 1.2680628173  | -0.9171291592 | 0.8033552409  |
| H | 1.2062953981  | -0.4601523502 | 1.7893248681  |
| C | 2.3475488144  | -1.967515748  | 0.6472651743  |
| C | 0.8374023541  | -0.1408789946 | -0.2736235393 |
| H | 1.3000397966  | -0.3161984344 | -1.2419382858 |
| C | 0.2853756566  | 1.2420347856  | -0.0283641928 |
| C | -3.2625971949 | -0.265640724  | -0.3607746407 |
| H | -2.1931368616 | -1.233342748  | 2.0198148902  |
| C | -4.040232345  | 0.0111634679  | 0.9398139163  |
| C | -4.1474623564 | -1.1516955097 | -1.2723875466 |
| C | -3.0326935857 | 1.0895897188  | -1.0641502738 |
| H | -2.4888357843 | 1.7827504704  | -0.4175736497 |
| H | -3.9965010121 | 1.5476028022  | -1.3126214924 |
| H | -2.4719730001 | 0.9850600421  | -1.996956132  |

|   |               |               |               |
|---|---------------|---------------|---------------|
| H | -5.1144715085 | -0.6707201245 | -1.4617145692 |
| H | -4.3341314609 | -2.1245123547 | -0.8059417833 |
| H | -3.6608217238 | -1.3313119291 | -2.235950208  |
| H | -4.3149565642 | -0.9140142191 | 1.4558957387  |
| H | -4.9672992539 | 0.5460076762  | 0.7089544277  |
| H | -3.4620304017 | 0.6323957779  | 1.6319863537  |
| H | -0.4737861609 | 1.1759867922  | 0.7640540154  |
| H | -0.2289906839 | 1.5975780759  | -0.9242138135 |
| C | 1.3525524246  | 2.2702726039  | 0.3925210715  |
| H | 1.9126467424  | 1.872414277   | 1.2478660343  |
| C | 0.7731776436  | 3.6449486826  | 0.7613639564  |
| H | 2.0814804037  | 2.3896807504  | -0.4216102944 |
| H | 1.584937114   | 4.2806765177  | 1.1375387542  |
| H | 0.068660076   | 3.5237365361  | 1.5959537489  |
| C | 0.070970135   | 4.3630241876  | -0.3971832004 |
| H | -0.2553031116 | 5.3655457654  | -0.1017551328 |
| H | -0.8148096423 | 3.8171312609  | -0.7376219588 |
| H | 0.7433924423  | 4.4705600291  | -1.2565391879 |
| C | 3.7808023712  | -1.4135221381 | 0.8129972703  |
| H | 2.2463004707  | -2.4513498699 | -0.3332592033 |
| H | 2.2129104043  | -2.7621964449 | 1.3911660725  |
| H | 3.8543845879  | -0.9393448316 | 1.8009608521  |
| C | 4.242079631   | -0.4122782443 | -0.2563877701 |
| H | 4.4786158913  | -2.2625644166 | 0.8284334501  |
| C | 4.3279944906  | -1.0014584564 | -1.6683653217 |
| H | 5.2299910802  | -0.0306266488 | 0.0314450528  |
| H | 3.5698288416  | 0.4527372598  | -0.2600162447 |
| H | 4.7230375016  | -0.268406694  | -2.3792588322 |
| H | 3.3477142393  | -1.3193663212 | -2.0381343215 |
| H | 4.9867137864  | -1.8776360117 | -1.6909518951 |
| H | 4.9867137864  | -1.8776360117 | -1.6909518951 |

TS endo 0259

E(RB3LYP) = -706.412209049 A.U.

First frequency = -499.5470  $\text{cm}^{-1}$

|   |               |               |               |
|---|---------------|---------------|---------------|
| H | -1.7509279221 | -0.1823988439 | -2.2178305892 |
| C | -1.3397713272 | -0.8387127023 | -1.4566883775 |

|   |               |               |               |
|---|---------------|---------------|---------------|
| H | -0.7025856267 | -1.6192265078 | -1.8514893815 |
| C | -1.994495874  | -1.0025494509 | -0.2404170507 |
| C | -1.3534067386 | -1.7795742287 | 0.7521640793  |
| C | -0.155620174  | -2.4372701122 | 0.5295943611  |
| H | 0.3472241682  | -2.9274113114 | 1.3587923546  |
| H | 0.0617010413  | -2.868404783  | -0.4404612459 |
| C | 1.3413723212  | -0.8757838979 | -0.1128918983 |
| H | 1.5175361306  | -0.681597998  | 0.9419058676  |
| C | 2.3406311831  | -1.7804029928 | -0.8021649901 |
| C | 0.6582319075  | 0.1042691164  | -0.8303674043 |
| H | 0.8758078598  | 0.191863196   | -1.8936019227 |
| C | 0.1753122575  | 1.3544071061  | -0.1381669725 |
| C | -3.3352357949 | -0.2837235449 | 0.0320943628  |
| H | -1.7057735927 | -1.7133374583 | 1.7762408915  |
| C | -4.413302935  | -0.9921894522 | -0.8251812927 |
| C | -3.2988704823 | 1.209983978   | -0.3578621535 |
| C | -3.7650011602 | -0.368432164  | 1.5090209643  |
| H | -3.0359578679 | 0.1118264486  | 2.1702265805  |
| H | -3.8967397298 | -1.4040817536 | 1.8373780818  |
| H | -4.7235706365 | 0.1430276518  | 1.6444800719  |
| H | -2.6136690507 | 1.7694859072  | 0.2838460595  |
| H | -4.2971650256 | 1.6474359858  | -0.2461035317 |
| H | -2.9914955124 | 1.3621370283  | -1.3960262512 |
| H | -5.4004916175 | -0.5464175091 | -0.6547341558 |
| H | -4.4704144    | -2.0567596215 | -0.5757132811 |
| H | -4.1813350574 | -0.9111349919 | -1.8915683765 |
| H | -0.3690368959 | 1.0617016835  | 0.7707841819  |
| H | -0.5417815687 | 1.874947144   | -0.7774821567 |
| C | 1.311871467   | 2.3181008183  | 0.2515601269  |
| H | 2.037897227   | 1.7772424695  | 0.8709138927  |
| C | 0.8325870806  | 3.5654443286  | 1.0105810825  |
| H | 1.8533610521  | 2.6258431301  | -0.6541930954 |
| H | 1.7100832598  | 4.1380789387  | 1.3372567952  |
| H | 0.315723221   | 3.2498333518  | 1.9275641053  |
| C | -0.0885022164 | 4.4827791977  | 0.197420966   |
| H | -0.3369911932 | 5.390426041   | 0.7571013146  |
| H | -1.0308020095 | 3.9889162844  | -0.0607365963 |
| H | 0.3916929827  | 4.7893098994  | -0.7393866199 |

|   |              |               |               |
|---|--------------|---------------|---------------|
| C | 3.6971808232 | -1.0989037633 | -1.0824945959 |
| H | 1.9193085729 | -2.1156180502 | -1.7601698878 |
| H | 2.5061096315 | -2.687894083  | -0.2101335701 |
| H | 4.3475773495 | -1.8160549486 | -1.6029227399 |
| C | 4.4273085857 | -0.5733132047 | 0.1634653558  |
| H | 3.5323687178 | -0.2638375404 | -1.7751165179 |
| C | 4.7323069167 | -1.6499154874 | 1.2105240616  |
| H | 3.8312872243 | 0.2242271491  | 0.6235337949  |
| H | 5.3659434644 | -0.1034165611 | -0.1562965573 |
| H | 5.3237503189 | -1.2423362147 | 2.036771665   |
| H | 5.2989450356 | -2.4793717356 | 0.7711894224  |
| H | 3.8154384383 | -2.0681823511 | 1.6392130993  |
| H | 3.8154384383 | -2.0681823511 | 1.6392130993  |

TS endo 0266

E(RB3LYP) = -706.411183270 A.U.

First frequency = -521.5456 cm<sup>-1</sup>

|   |               |               |               |
|---|---------------|---------------|---------------|
| H | -1.6200221093 | 0.0349780549  | -2.1653426166 |
| C | -1.2068466215 | -0.6157648424 | -1.4031830619 |
| H | -0.3773506167 | -1.2184754781 | -1.7552279106 |
| C | -2.0000896509 | -1.0727596273 | -0.3525526449 |
| C | -1.3662493611 | -1.8289958911 | 0.6588414386  |
| C | -0.0316736848 | -2.1894561276 | 0.6119613478  |
| H | 0.4163713836  | -2.6718992937 | 1.4753390053  |
| H | 0.4462752958  | -2.4221772245 | -0.3318258408 |
| C | 1.1647779788  | -0.2308830868 | 0.291596184   |
| H | 1.1901656204  | -0.1510818153 | 1.375602923   |
| C | 2.4146765971  | -0.7722456198 | -0.3732138803 |
| C | 0.3119836605  | 0.6298741672  | -0.40079839   |
| H | 0.6283160681  | 0.9427864466  | -1.3941312053 |
| C | -0.533632762  | 1.6131821479  | 0.3762900741  |
| C | -3.4821926375 | -0.6761974044 | -0.1835908512 |
| H | -1.9001703846 | -1.9894605701 | 1.5926652524  |
| C | -4.3144994508 | -1.9807813821 | -0.2404860245 |
| C | -3.9723753935 | 0.2552491571  | -1.3068428625 |
| C | -3.7562029794 | 0.027222558   | 1.1655853809  |
| H | -4.8292883857 | 0.2197666106  | 1.2770010029  |



|   |               |               |               |
|---|---------------|---------------|---------------|
| H | -3.2356102867 | 0.9865781155  | 1.2236413485  |
| H | -3.4427332528 | -0.5788039084 | 2.0198655711  |
| H | -5.0323150293 | 0.4873496644  | -1.1600514214 |
| H | -3.8676347691 | -0.2082957285 | -2.2928180018 |
| H | -3.4246061694 | 1.2034450664  | -1.3142675811 |
| H | -4.1566687557 | -2.5012345251 | -1.1906664979 |
| H | -5.3840042035 | -1.7604378032 | -0.1427240982 |
| H | -4.0352727319 | -2.6664075294 | 0.5653172614  |
| H | -1.0252665472 | 1.0677312096  | 1.1899861981  |
| H | -1.3320165483 | 2.0139674733  | -0.2604029795 |
| C | 0.2703353343  | 2.7840597245  | 0.9749268392  |
| H | -0.4030566997 | 3.400263814   | 1.5873532668  |
| C | 0.9496348577  | 3.6742747165  | -0.0720406507 |
| H | 1.0324676471  | 2.3854245099  | 1.6580543813  |
| H | 0.1924209103  | 4.0432082088  | -0.7780562124 |
| H | 1.6494467488  | 3.0704317234  | -0.6635788051 |
| C | 1.6962669778  | 4.8582084032  | 0.5486639666  |
| H | 2.4774081796  | 4.5130057821  | 1.2358043043  |
| H | 1.0149448216  | 5.4984735423  | 1.1208261748  |
| H | 2.1751946537  | 5.4793247667  | -0.2154390854 |
| C | 3.2788285575  | -1.6646137053 | 0.5259966415  |
| H | 3.017888261   | 0.0771872012  | -0.722383129  |
| H | 2.1423396933  | -1.3257230719 | -1.2863533202 |
| H | 3.5628180786  | -1.0949198238 | 1.4225230061  |
| C | 4.5465376299  | -2.2055003154 | -0.1527722701 |
| H | 2.6790630656  | -2.5101332594 | 0.8804494188  |
| C | 5.5676900287  | -1.1275607947 | -0.5349864693 |
| H | 4.2602347459  | -2.7734794554 | -1.0488192955 |
| H | 5.0254146136  | -2.9259453082 | 0.5223961065  |
| H | 5.1707348755  | -0.4363214318 | -1.2851547337 |
| H | 6.4770284275  | -1.5741608924 | -0.9501603513 |
| H | 5.8567787491  | -0.5346524186 | 0.3407158612  |
| H | 5.8567787491  | -0.5346524186 | 0.3407158612  |

TS endo 0277

E(RB3LYP) = -706.411183422 A.U.

First frequency = -524.3755 cm<sup>-1</sup>

|   |               |               |               |
|---|---------------|---------------|---------------|
| H | -1.5937265127 | -0.7096665318 | -2.2392545754 |
| C | -1.1247750356 | -0.9951915582 | -1.3044065866 |
| H | -0.267801425  | -1.646576836  | -1.4342840904 |
| C | -1.8678246807 | -1.0551186357 | -0.126288819  |
| C | -1.1685482574 | -1.3346816358 | 1.0683699211  |
| C | 0.186427534   | -1.6085546355 | 1.1058452577  |
| H | 0.6821998022  | -1.697988612  | 2.0676162011  |
| H | 0.66469649    | -2.1542510928 | 0.3014522642  |
| C | 1.2212197608  | 0.1553394672  | 0.0265611907  |
| H | 1.2299657901  | 0.649295641   | 0.9934286871  |
| C | 2.5129962006  | -0.5143862328 | -0.398710988  |
| C | 0.3208897252  | 0.6209465289  | -0.9353778611 |
| H | 0.6310994751  | 0.5261172869  | -1.9765151262 |
| C | -0.5739753163 | 1.8038983989  | -0.6408476132 |
| C | -3.365565158  | -0.6901100894 | -0.0542000611 |
| H | -1.6733628221 | -1.1540080025 | 2.0147282813  |
| C | -3.9461551632 | -0.3149671309 | -1.429591528  |
| C | -3.6342027049 | 0.4870251566  | 0.9115980359  |
| C | -4.1217619517 | -1.9389022443 | 0.4616655474  |
| H | -3.9653568539 | -2.7915922702 | -0.2069799804 |
| H | -5.1984066451 | -1.740450963  | 0.5194591087  |
| H | -3.7782750524 | -2.230144593  | 1.4587990332  |
| H | -3.2625950468 | 0.2861334308  | 1.9200616591  |
| H | -4.7116960005 | 0.6716389148  | 0.9895744874  |
| H | -3.1606500354 | 1.4053889305  | 0.5555253145  |
| H | -5.0151512587 | -0.0980404093 | -1.3341743027 |
| H | -3.8352310092 | -1.1300873949 | -2.1516700462 |
| H | -3.4653710891 | 0.576980723   | -1.8446611443 |
| H | -0.9232683265 | 1.7330240748  | 0.3950891747  |
| H | -1.4708821358 | 1.7612960289  | -1.2684592168 |
| C | 0.1051115217  | 3.1711589717  | -0.8810277538 |
| H | 0.4402314139  | 3.2126215876  | -1.9263261472 |
| C | 1.2908577624  | 3.5086986871  | 0.0357225148  |
| H | -0.6573406172 | 3.9557526247  | -0.7743748229 |
| H | 1.732395992   | 4.4543223074  | -0.3040271604 |
| H | 2.0716605815  | 2.7477898575  | -0.0803603726 |
| C | 0.9158796466  | 3.6384867293  | 1.5159408624  |
| H | 0.1339795181  | 4.3937507017  | 1.6582317481  |

|   |              |               |               |
|---|--------------|---------------|---------------|
| H | 1.7802268696 | 3.9349989649  | 2.1191500852  |
| H | 0.5378350996 | 2.6963604415  | 1.9256513543  |
| C | 3.421591608  | -0.9448685192 | 0.7596768834  |
| H | 3.0800703739 | 0.179415323   | -1.0388297617 |
| H | 2.282158974  | -1.3751504455 | -1.0433743727 |
| H | 3.5730893388 | -0.080195301  | 1.4199535802  |
| C | 4.7899758704 | -1.4823035171 | 0.3150203556  |
| H | 2.9179672815 | -1.7073083043 | 1.365922579   |
| C | 4.7154070997 | -2.7854964034 | -0.4892532397 |
| H | 5.4101194074 | -1.6467838748 | 1.205256993   |
| H | 5.3057582703 | -0.7145917664 | -0.2781506122 |
| H | 4.1870174087 | -3.5633922286 | 0.0744970115  |
| H | 5.7154308115 | -3.1645617304 | -0.7235260422 |
| H | 4.1864377237 | -2.6485846226 | -1.4378806989 |
| H | 4.1864377237 | -2.6485846226 | -1.4378806989 |

TS endo 0279

E(RB3LYP) = -706.411056145 A.U.

First frequency = -524.6996 cm<sup>-1</sup>

|   |               |               |               |
|---|---------------|---------------|---------------|
| H | -1.4128804419 | -0.336489503  | -2.2154704663 |
| C | -1.034019341  | -0.8336520647 | -1.3296707892 |
| H | -0.2933635035 | -1.5948664144 | -1.5477189753 |
| C | -1.8207625913 | -0.938275752  | -0.1834753311 |
| C | -1.2232624154 | -1.5055136756 | 0.964083816   |
| C | 0.0620582651  | -2.0165591245 | 0.9747140463  |
| H | 0.4983982328  | -2.3315739745 | 1.9177631915  |
| H | 0.4672370781  | -2.5153255359 | 0.1027223967  |
| C | 1.4395321171  | -0.3328093763 | 0.1660778779  |
| H | 1.5282633048  | -0.0108061099 | 1.2007544373  |
| C | 2.5885285469  | -1.1516496352 | -0.3866158684 |
| C | 0.6415321693  | 0.4347844622  | -0.6836894124 |
| H | 0.9423175426  | 0.4900108172  | -1.729442356  |
| C | -0.0679038187 | 1.6496434113  | -0.1347923722 |
| C | -3.2407311014 | -0.3414802854 | -0.0803548716 |
| H | -1.7253207021 | -1.3810536037 | 1.9208435681  |
| C | -3.684177938  | 0.3485780638  | -1.3830062477 |
| C | -3.3687765539 | 0.6885680446  | 1.0658040935  |

|   |               |               |               |
|---|---------------|---------------|---------------|
| C | -4.2116925813 | -1.5152240196 | 0.1982195784  |
| H | -4.1595024666 | -2.260727321  | -0.6018432269 |
| H | -5.2446454952 | -1.1539110695 | 0.264662807   |
| H | -3.9681892892 | -2.0184583591 | 1.1388595741  |
| H | -2.7476594285 | 1.5682979931  | 0.8789424727  |
| H | -3.0771451219 | 0.2702401003  | 2.0329203814  |
| H | -4.4083935737 | 1.0238106362  | 1.1540308003  |
| H | -3.6783535911 | -0.3434426958 | -2.230964357  |
| H | -3.040189554  | 1.1988644329  | -1.6312333054 |
| H | -4.704702397  | 0.7294636742  | -1.2719809786 |
| H | -0.5201226313 | 1.3781113611  | 0.8274720423  |
| H | -0.8916077053 | 1.9334418852  | -0.7973417612 |
| C | 0.8660080681  | 2.8550989667  | 0.0746908452  |
| H | 1.7140693313  | 2.5403922578  | 0.6956776069  |
| C | 0.1787085161  | 4.0635495406  | 0.7297954291  |
| H | 1.2914847802  | 3.1567910897  | -0.8931057253 |
| H | 0.933417306   | 4.8365139031  | 0.9235805285  |
| H | -0.2108387073 | 3.7641548703  | 1.7126734221  |
| C | -0.9565617916 | 4.6705190799  | -0.1031764437 |
| H | -1.3572207839 | 5.5721185766  | 0.3715294037  |
| H | -1.7885270909 | 3.9701053988  | -0.229303027  |
| H | -0.6038811886 | 4.9484250926  | -1.1034800163 |
| C | 3.4036028364  | -1.9001521132 | 0.6750644325  |
| H | 3.2559080758  | -0.4821877358 | -0.9467059084 |
| H | 2.2107198813  | -1.869976839  | -1.1321303787 |
| H | 3.8005704811  | -1.1711245473 | 1.3960885986  |
| C | 4.5622764808  | -2.7351132698 | 0.1088307879  |
| H | 2.7379590133  | -2.5586445142 | 1.2439392298  |
| C | 5.6679191925  | -1.9099269771 | -0.5600411903 |
| H | 4.1625003464  | -3.4634088271 | -0.6103734766 |
| H | 5.0012765871  | -3.3240225254 | 0.9241221746  |
| H | 6.0725834367  | -1.1633510294 | 0.1333876167  |
| H | 5.3018589768  | -1.3762100596 | -1.442813876  |
| H | 6.4966083241  | -2.5481725626 | -0.88354475   |
| H | 6.4966083241  | -2.5481725626 | -0.88354475   |

TS endo 0285

E(RB3LYP) = -706.411735960 A.U.

First frequency =  $-525.6374 \text{ cm}^{-1}$

|   |               |               |               |
|---|---------------|---------------|---------------|
| H | -1.0097828749 | -0.0059935697 | -1.9750365114 |
| C | -0.7925611105 | -0.6405499749 | -1.1237675725 |
| H | 0.087185708   | -1.2559157856 | -1.2542738872 |
| C | -1.8020161506 | -1.0442560701 | -0.2549896095 |
| C | -1.4206199543 | -1.7653824742 | 0.8987662334  |
| C | -0.10591982   | -2.1031526363 | 1.1732831793  |
| H | 0.1420562068  | -2.5484482863 | 2.1329981403  |
| H | 0.5693983158  | -2.3742394709 | 0.3706748037  |
| C | 1.074535796   | -0.1880533485 | 1.1715433002  |
| H | 0.7234123734  | -0.0092813062 | 2.1855645466  |
| C | 2.4802392673  | -0.7618044019 | 1.0999641996  |
| C | 0.5274656978  | 0.6326213966  | 0.1816637543  |
| H | 1.1245676456  | 0.8349111027  | -0.7029085901 |
| C | -0.4467160978 | 1.716374441   | 0.5845976674  |
| C | -3.276811408  | -0.6208958316 | -0.4267345195 |
| H | -2.1519563547 | -1.8906976399 | 1.693749797   |
| C | -3.4916231618 | 0.2665197123  | -1.6660136611 |
| C | -3.8178158178 | 0.1456933284  | 0.8018070054  |
| C | -4.1068293327 | -1.9150975969 | -0.6095098601 |
| H | -4.0232161227 | -2.5688719298 | 0.263967193   |
| H | -3.7607139589 | -2.4785897854 | -1.4820336601 |
| H | -5.1670519351 | -1.6759804342 | -0.7532372206 |
| H | -3.2989466507 | 1.0991077701  | 0.9315549724  |
| H | -3.7093204485 | -0.4258691877 | 1.727465969   |
| H | -4.8847832855 | 0.3593696607  | 0.6714366032  |
| H | -3.18423081   | -0.2405319196 | -2.5859911958 |
| H | -2.9359013365 | 1.2071140466  | -1.5911183627 |
| H | -4.5530843723 | 0.5170179912  | -1.7633440129 |
| H | -1.1758300744 | 1.2843197076  | 1.2791298569  |
| H | -1.0163024967 | 2.0615475238  | -0.2850491734 |
| C | 0.2317099444  | 2.9208509985  | 1.2714186125  |
| H | -0.5406504577 | 3.6610661328  | 1.5240882345  |
| C | 1.3294735676  | 3.6017343296  | 0.4387785817  |
| H | 0.6660809512  | 2.5854578544  | 2.2219026075  |
| H | 2.1521129152  | 2.8930132484  | 0.2784338489  |
| H | 1.7508796274  | 4.4294519873  | 1.0231660101  |

|   |              |               |               |
|---|--------------|---------------|---------------|
| C | 0.8451979984 | 4.1334962346  | -0.9144809486 |
| H | 0.0012078748 | 4.8219128607  | -0.7886368827 |
| H | 0.5123950946 | 3.3225695001  | -1.5710697404 |
| H | 1.6414499087 | 4.6734745635  | -1.4371142132 |
| C | 3.0157467896 | -1.0791702472 | -0.301884571  |
| H | 2.5397569898 | -1.6704808362 | 1.7139047695  |
| H | 3.1665629224 | -0.0447871392 | 1.5773611083  |
| H | 2.3289724099 | -1.7594530182 | -0.8235940414 |
| C | 4.4136530776 | -1.7075903157 | -0.2743152312 |
| H | 3.0497728818 | -0.1628655953 | -0.9052296096 |
| C | 4.9594663433 | -2.0096703294 | -1.6726279988 |
| H | 4.3826071387 | -2.6324422423 | 0.3174589567  |
| H | 5.1017794856 | -1.0328070528 | 0.252871894   |
| H | 5.9568699658 | -2.4587074251 | -1.627228138  |
| H | 5.0316390361 | -1.0958147713 | -2.2734158236 |
| H | 4.3042339538 | -2.7054342244 | -2.2092397449 |
| H | 4.3042339538 | -2.7054342244 | -2.2092397449 |

TS endo 0289

E(RB3LYP) = -706.411046828 A.U.

First frequency = -525.0498  $\text{cm}^{-1}$

|   |               |               |               |
|---|---------------|---------------|---------------|
| H | -1.3226915159 | -0.3212622153 | -2.0822336452 |
| C | -1.0294095942 | -0.8711848903 | -1.1956980024 |
| H | -0.1739597948 | -1.5153263269 | -1.346724249  |
| C | -1.9505865221 | -1.1616268292 | -0.1942206115 |
| C | -1.4638190052 | -1.7705272592 | 0.9844412616  |
| C | -0.1316285611 | -2.1047663212 | 1.1625099227  |
| H | 0.2049680048  | -2.457234679  | 2.1337690553  |
| H | 0.458557431   | -2.4688656468 | 0.3299433048  |
| C | 1.0577866023  | -0.2255278804 | 0.8598382007  |
| H | 0.7969229052  | 0.0689168462  | 1.8742371953  |
| C | 2.4483563047  | -0.827350195  | 0.7349074763  |
| C | 0.4391644166  | 0.498298727   | -0.1632386601 |
| H | 0.9561155174  | 0.5841286947  | -1.1142914332 |
| C | -0.476094077  | 1.645848761   | 0.2029079486  |
| C | -3.4303797342 | -0.7263305921 | -0.2621206813 |
| H | -2.1136756059 | -1.8002829651 | 1.8558352618  |

|   |               |               |               |
|---|---------------|---------------|---------------|
| C | -3.7579193769 | 0.0370741591  | -1.5579836649 |
| C | -3.8370739885 | 0.1707029979  | 0.9293511947  |
| C | -4.2889650695 | -2.0143426918 | -0.2296197371 |
| H | -5.3554671103 | -1.7682577744 | -0.2921098118 |
| H | -4.1258648981 | -2.5788501014 | 0.6934674016  |
| H | -4.0380667513 | -2.6697036387 | -1.06994974   |
| H | -3.6426105543 | -0.3072942572 | 1.8931779597  |
| H | -4.9093063836 | 0.3927771823  | 0.883759579   |
| H | -3.2975077517 | 1.121332524   | 0.909561256   |
| H | -3.5505120831 | -0.5661655563 | -2.4473760682 |
| H | -3.1859458835 | 0.9677388092  | -1.634133942  |
| H | -4.8207058586 | 0.2999818075  | -1.5751286831 |
| H | -1.1577423866 | 1.3023870453  | 0.9891751579  |
| H | -1.1007386731 | 1.9261325051  | -0.6542112898 |
| C | 0.2765369741  | 2.8933915682  | 0.707508283   |
| H | -0.4575589847 | 3.6479299287  | 1.0239226267  |
| C | 1.2186602799  | 3.5147782926  | -0.3298772685 |
| H | 0.8531196783  | 2.6271163285  | 1.6039106689  |
| H | 0.6491226152  | 3.7486779325  | -1.2403052693 |
| H | 1.9732727062  | 2.7742945074  | -0.6241667069 |
| C | 1.9160486546  | 4.7783792421  | 0.1813694311  |
| H | 2.5144568869  | 4.5624521274  | 1.074025237   |
| H | 1.1862317019  | 5.5494777005  | 0.4539181943  |
| H | 2.5852790263  | 5.2042217109  | -0.5735108341 |
| C | 2.8611764501  | -1.2841466416 | -0.6714215806 |
| H | 2.5485743204  | -1.6772664578 | 1.4238185677  |
| H | 3.1683758596  | -0.0770373374 | 1.0922804689  |
| H | 2.0908205127  | -1.9495162893 | -1.0814830692 |
| C | 4.2136076264  | -2.012604479  | -0.7129936512 |
| H | 2.9036926635  | -0.4177382704 | -1.3443881675 |
| C | 5.4074369239  | -1.1403365394 | -0.3077199785 |
| H | 4.376819257   | -2.3918684527 | -1.7296857949 |
| H | 4.1674009868  | -2.8960946939 | -0.0616339936 |
| H | 6.3508252862  | -1.6836356769 | -0.4235163017 |
| H | 5.3404605359  | -0.8180354587 | 0.7361400004  |
| H | 5.4627038354  | -0.2389939415 | -0.9295065266 |
| H | 5.4627038354  | -0.2389939415 | -0.9295065266 |

TS endo 0292

E(RB3LYP) = -706.411072335 A.U.

First frequency = -526.4920  $\text{cm}^{-1}$

|   |               |               |               |
|---|---------------|---------------|---------------|
| H | -1.2147607317 | -0.0652455803 | -2.1289263515 |
| C | -0.8900977892 | -0.6794301085 | -1.297198147  |
| H | 0.0120321577  | -1.2411935633 | -1.4977036453 |
| C | -1.7977090101 | -1.1366043085 | -0.3464620815 |
| C | -1.2792528516 | -1.8249965524 | 0.7731343583  |
| C | 0.0722988235  | -2.079217908  | 0.9386121416  |
| H | 0.4246730755  | -2.5027150936 | 1.8753369037  |
| H | 0.6941511465  | -2.3167103052 | 0.0837973256  |
| C | 1.1278010734  | -0.1014492166 | 0.8407416123  |
| H | 0.8464077371  | 0.0649672416  | 1.8784431338  |
| C | 2.5553289727  | -0.5945878793 | 0.6647515352  |
| C | 0.4592189854  | 0.6805817491  | -0.1052613505 |
| H | 0.9699164169  | 0.9085374626  | -1.0359922812 |
| C | -0.5440897691 | 1.7069346776  | 0.3727486151  |
| C | -3.3049076504 | -0.8054168232 | -0.3968565247 |
| H | -1.9333761141 | -1.9893984488 | 1.6261251696  |
| C | -4.0652304814 | -2.1489035653 | -0.5158426228 |
| C | -3.673587827  | 0.0648760712  | -1.6118195554 |
| C | -3.791469989  | -0.0716149389 | 0.8737383424  |
| H | -3.3233290637 | 0.9120973533  | 0.9648938677  |
| H | -3.5745952633 | -0.6339625141 | 1.7858623152  |
| H | -4.8765067738 | 0.0761035074  | 0.8299090302  |
| H | -4.7526018516 | 0.2508444473  | -1.6212000973 |
| H | -3.4127477502 | -0.4246648412 | -2.5553463093 |
| H | -3.1709028808 | 1.0372213586  | -1.5799281002 |
| H | -3.756096421  | -2.6919772508 | -1.4147819287 |
| H | -5.1463396915 | -1.976234501  | -0.5732152418 |
| H | -3.8711449344 | -2.7939941807 | 0.3464623187  |
| H | -1.1983973858 | 1.2276387958  | 1.1096509691  |
| H | -1.1869211028 | 2.0285557431  | -0.4559069835 |
| C | 0.1052314347  | 2.9476201863  | 1.0176707804  |
| H | -0.6876066848 | 3.6009832758  | 1.4086621075  |
| C | 0.993159959   | 3.7537105296  | 0.0627500127  |
| H | 0.7018444824  | 2.6317914665  | 1.8843514243  |



|   |              |               |               |
|---|--------------|---------------|---------------|
| H | 0.4059142434 | 4.0394029957  | -0.8212714631 |
| H | 1.8055053011 | 3.1138207795  | -0.3047132441 |
| C | 1.5852380968 | 5.0058913594  | 0.7153251495  |
| H | 2.1996507577 | 4.74260617    | 1.5840670678  |
| H | 0.7949484889 | 5.6805107117  | 1.0643817843  |
| H | 2.2170984743 | 5.5650446884  | 0.0173565923  |
| C | 2.9986305006 | -0.8816876113 | -0.7766784594 |
| H | 2.7045055106 | -1.4908561038 | 1.2782260349  |
| H | 3.2348536259 | 0.1627872714  | 1.0867868954  |
| H | 2.3082298706 | -1.5944807247 | -1.248004817  |
| C | 4.4298332828 | -1.4319189574 | -0.8858883759 |
| H | 2.9307312285 | 0.0409105732  | -1.365438081  |
| C | 4.6070640167 | -2.8399959491 | -0.3057500847 |
| H | 5.1216157428 | -0.7385616759 | -0.3880564751 |
| H | 4.7210609744 | -1.4445680514 | -1.9437033101 |
| H | 5.6258876214 | -3.207550892  | -0.4654186207 |
| H | 3.9183936752 | -3.5478499149 | -0.7818172914 |
| H | 4.4146338594 | -2.8665079691 | 0.7713618468  |
| H | 4.4146338594 | -2.8665079691 | 0.7713618468  |

TS endo 0300

E(RB3LYP) = -706.411052794 A.U.

First frequency = -527.6908  $\text{cm}^{-1}$

|   |               |               |               |
|---|---------------|---------------|---------------|
| H | -1.0870500263 | -0.5180244268 | -2.1868073738 |
| C | -0.8326122502 | -0.9570602716 | -1.2291690422 |
| H | -0.0584461699 | -1.7098080994 | -1.2885927986 |
| C | -1.7553240389 | -0.9882877608 | -0.1876775618 |
| C | -1.3091329715 | -1.4632726053 | 1.0659444822  |
| C | -0.0184669086 | -1.9171262664 | 1.2811119003  |
| H | 0.3029788231  | -2.1537796415 | 2.2918250857  |
| H | 0.504406997   | -2.4687900479 | 0.5090369639  |
| C | 1.3662247317  | -0.2537717448 | 0.6765577566  |
| H | 1.1734425629  | 0.2101102866  | 1.6415991791  |
| C | 2.6755687603  | -1.0236044505 | 0.6161929513  |
| C | 0.7940266346  | 0.3814803365  | -0.4292397776 |
| H | 1.2935924854  | 0.2897110226  | -1.3904298575 |
| C | 0.0135264278  | 1.6572605451  | -0.2139884174 |

|   |               |               |               |
|---|---------------|---------------|---------------|
| C | -3.1781978295 | -0.4006152198 | -0.3072356565 |
| H | -1.9349196912 | -1.2851345029 | 1.9373991873  |
| C | -4.1762271561 | -1.5541324313 | -0.041880395  |
| C | -3.4625501729 | 0.1662120254  | -1.7098012684 |
| C | -3.438261619  | 0.7267888798  | 0.718235342   |
| H | -2.8036487233 | 1.5938251713  | 0.5172880846  |
| H | -3.2520533354 | 0.4033625518  | 1.7458552654  |
| H | -4.4821960071 | 1.0552422412  | 0.660479874   |
| H | -4.49016821   | 0.5413959162  | -1.7570506022 |
| H | -3.3509932958 | -0.5977832634 | -2.4855828224 |
| H | -2.7956086474 | 1.0002472581  | -1.9520540462 |
| H | -4.0292111486 | -2.3675102318 | -0.7597886155 |
| H | -5.209181076  | -1.1982496925 | -0.132413119  |
| H | -4.0491151138 | -1.9692836939 | 0.9624548084  |
| H | -0.6383674299 | 1.5142781451  | 0.6541567847  |
| H | -0.6436856211 | 1.8601326642  | -1.068723351  |
| C | 0.9234359406  | 2.8780794336  | 0.0170854004  |
| H | 1.5500098935  | 2.6956457798  | 0.9008455772  |
| C | 0.159913625   | 4.1999633555  | 0.1922337324  |
| H | 1.6143869506  | 2.9701800835  | -0.8316405673 |
| H | -0.4609403601 | 4.3785731664  | -0.6966565085 |
| H | 0.8836524732  | 5.0242948522  | 0.228317312   |
| C | -0.7189091668 | 4.2516849273  | 1.4475688893  |
| H | -1.1866862983 | 5.2348062192  | 1.563541252   |
| H | -0.1256460187 | 4.055672113   | 2.3485401001  |
| H | -1.5220916331 | 3.5086884816  | 1.4147768004  |
| C | 2.9767365036  | -1.7410813425 | -0.7074397691 |
| H | 2.7085706742  | -1.7609370512 | 1.4300071361  |
| H | 3.4888722498  | -0.3156759731 | 0.8320190357  |
| H | 2.1235622416  | -2.3734075376 | -0.9836394539 |
| C | 4.2409273205  | -2.6138512712 | -0.6643428543 |
| H | 3.0815749322  | -1.0034428356 | -1.5136895987 |
| C | 5.5382416763  | -1.8278078693 | -0.4420142667 |
| H | 4.3166294206  | -3.1684828236 | -1.6081816381 |
| H | 4.1304227217  | -3.3695809571 | 0.1253622702  |
| H | 6.4118516664  | -2.4858598764 | -0.4907754195 |
| H | 5.5532979477  | -1.3344682857 | 0.5349229909  |
| H | 5.6616643451  | -1.0518039477 | -1.2066156055 |

H 5.6616643451 -1.0518039477 -1.2066156055

TS endo 0303

E(RB3LYP) = -706.412422815 A.U.

First frequency = -522.7650 cm<sup>-1</sup>

|   |               |               |               |
|---|---------------|---------------|---------------|
| H | -0.9785689052 | -0.0537053328 | -2.1372195129 |
| C | -0.874086602  | -0.7753419682 | -1.3363166141 |
| H | -0.2428507096 | -1.6170032029 | -1.589353991  |
| C | -1.8451723414 | -0.8983221587 | -0.3487501686 |
| C | -1.5878800045 | -1.7896328222 | 0.7173278684  |
| C | -0.4436689889 | -2.5710867445 | 0.7774365335  |
| H | -0.2509488446 | -3.1635651559 | 1.6680620896  |
| H | -0.034695442  | -2.9975638969 | -0.1316464172 |
| C | 1.2999676219  | -1.2318302072 | 0.6991571156  |
| H | 1.2202960152  | -1.0711823163 | 1.7732896738  |
| C | 2.3619480131  | -2.2303375238 | 0.2828618695  |
| C | 0.9864346673  | -0.1380862787 | -0.1130770978 |
| H | 1.4941060863  | -0.0570795048 | -1.0714296121 |
| C | 0.5143833518  | 1.1546948075  | 0.5107874464  |
| C | -3.1301620255 | -0.0413774956 | -0.3174146106 |
| H | -2.2122139117 | -1.7310742105 | 1.6052228175  |
| C | -4.3247313036 | -1.0115111187 | -0.4907473386 |
| C | -3.1817349324 | 0.9908921945  | -1.4580151218 |
| C | -3.3036030292 | 0.7194878438  | 1.0166844401  |
| H | -3.3151440769 | 0.0487122556  | 1.8797341234  |
| H | -4.2529227146 | 1.2667598532  | 1.0153094443  |
| H | -2.5002941261 | 1.445959337   | 1.1670157204  |
| H | -4.1250218667 | 1.545063675   | -1.413014412  |
| H | -3.1262173113 | 0.5130189512  | -2.4409545109 |
| H | -2.368085706  | 1.7182547504  | -1.3827477349 |
| H | -4.3591284636 | -1.7473751677 | 0.3184197402  |
| H | -4.2462605634 | -1.5584525119 | -1.4358870065 |
| H | -5.2725271138 | -0.4604520706 | -0.4901457903 |
| H | 1.2080121161  | 1.4322265147  | 1.3168728652  |
| H | -0.4497192108 | 0.9760578805  | 1.0050991596  |
| C | 0.4059505006  | 2.3170780316  | -0.4818944914 |
| H | 1.4119791389  | 2.5599345851  | -0.8533650739 |

|   |               |               |               |
|---|---------------|---------------|---------------|
| C | -0.2436666152 | 3.5851906396  | 0.0894291547  |
| H | -0.1654155918 | 1.9852890761  | -1.3558724164 |
| H | -1.2710889579 | 3.3536634956  | 0.4017197348  |
| H | -0.3320775521 | 4.3283234628  | -0.7134038848 |
| C | 0.5179066564  | 4.2058356719  | 1.2661116613  |
| H | 0.0523805522  | 5.1425156313  | 1.5896081883  |
| H | 1.5553793799  | 4.4266357445  | 0.988574563   |
| H | 0.5431037067  | 3.5352995533  | 2.1309574486  |
| C | 3.7901538173  | -1.8104666553 | 0.6975294131  |
| H | 2.3158393512  | -2.3786165557 | -0.8041619994 |
| H | 2.1622200874  | -3.2114780592 | 0.7308603908  |
| H | 3.8097193997  | -1.6929613805 | 1.7893823419  |
| C | 4.3281064024  | -0.5260671277 | 0.0489035057  |
| H | 4.4749127648  | -2.6386495956 | 0.4669030015  |
| C | 4.5105380135  | -0.6232118968 | -1.4694803155 |
| H | 5.2947091007  | -0.2847725763 | 0.5091430986  |
| H | 3.6591940231  | 0.3100671819  | 0.2855248859  |
| H | 4.9469247932  | 0.295255156   | -1.8753459799 |
| H | 3.559085872   | -0.7885590342 | -1.9851019818 |
| H | 5.1750471443  | -1.4542994973 | -1.7335338992 |
| H | 5.1750471443  | -1.4542994973 | -1.7335338992 |

TS endo 0309

E(RB3LYP) = -706.411736445 A.U.

First frequency = -512.9445  $\text{cm}^{-1}$

|   |               |               |               |
|---|---------------|---------------|---------------|
| H | -1.9764137567 | -0.2417365065 | -2.0963446941 |
| C | -1.4450005589 | -0.8385879109 | -1.364187985  |
| H | -0.7227647864 | -1.517680563  | -1.8019243632 |
| C | -2.0206866645 | -1.1349397996 | -0.1319482306 |
| C | -1.2239629082 | -1.8249036949 | 0.8107587573  |
| C | 0.0571181353  | -2.2688336311 | 0.5390445787  |
| H | 0.6550833187  | -2.6918114261 | 1.3406803937  |
| H | 0.3230631109  | -2.6167274148 | -0.4516757136 |
| C | 1.2357389082  | -0.4218135261 | -0.1872665521 |
| H | 1.4387557327  | -0.2182215792 | 0.8593843306  |
| C | 2.3390768011  | -1.09236684   | -0.9813248025 |
| C | 0.3156517703  | 0.4099918007  | -0.8246881436 |

|   |               |               |               |
|---|---------------|---------------|---------------|
| H | 0.4543503325  | 0.5769769913  | -1.8912648975 |
| C | -0.3235425128 | 1.5347599473  | -0.04245161   |
| C | -3.4190644386 | -0.6317307037 | 0.2849426029  |
| H | -1.5613534179 | -1.8576480033 | 1.8441162361  |
| C | -3.3818132315 | 0.2166031348  | 1.5768664051  |
| C | -4.2986560179 | -1.88083689   | 0.5374257685  |
| C | -4.0891581856 | 0.2143885275  | -0.8126609559 |
| H | -3.5141527589 | 1.1201055491  | -1.0323656342 |
| H | -5.085522864  | 0.5270782304  | -0.4834725911 |
| H | -4.2089052992 | -0.3493597453 | -1.7431505889 |
| H | -3.888908131  | -2.5000971388 | 1.3411812052  |
| H | -4.3604015541 | -2.5009222001 | -0.3627231958 |
| H | -5.3154034572 | -1.5854518081 | 0.8218378012  |
| H | -4.4005514225 | 0.4847376996  | 1.8789359779  |
| H | -2.822821189  | 1.1435938253  | 1.4245904035  |
| H | -2.9240813586 | -0.320044509  | 2.41220249    |
| H | -0.7126862334 | 1.1182180925  | 0.8935969568  |
| H | -1.1846624637 | 1.9384339739  | -0.5893341019 |
| C | 0.6496198445  | 2.6824981553  | 0.2930747977  |
| H | 0.1270577316  | 3.4220196578  | 0.9161680921  |
| C | 1.2354872993  | 3.3857561778  | -0.9363771258 |
| H | 1.4715702286  | 2.2876506873  | 0.9058335522  |
| H | 0.4148533989  | 3.759139146   | -1.5648551173 |
| H | 1.7791362637  | 2.6541733622  | -1.5475705893 |
| C | 2.1725149082  | 4.5397914711  | -0.569594582  |
| H | 2.5810759871  | 5.0276347099  | -1.4606948661 |
| H | 3.0165673745  | 4.182932861   | 0.0320107454  |
| H | 1.6490296161  | 5.3023918591  | 0.0185392068  |
| C | 3.2709886132  | -2.0289946661 | -0.1934144794 |
| H | 2.9512244497  | -0.3097190644 | -1.4517935783 |
| H | 1.8974695822  | -1.6486899065 | -1.821457784  |
| H | 2.7253665866  | -2.9292950629 | 0.1108209038  |
| C | 3.9231532303  | -1.400338391  | 1.0502590111  |
| H | 4.0634449574  | -2.3680643856 | -0.8739289439 |
| C | 4.6757136159  | -0.0949957808 | 0.7697249056  |
| H | 4.614130608   | -2.1332434048 | 1.4854935622  |
| H | 3.1596587507  | -1.2207639329 | 1.8176911254  |
| H | 5.4249530473  | -0.2320784396 | -0.0188389311 |

|   |              |              |              |
|---|--------------|--------------|--------------|
| H | 5.1948469269 | 0.2624278208 | 1.664812422  |
| H | 3.9943219432 | 0.6984633344 | 0.4450441316 |
| H | 3.9943219432 | 0.6984633344 | 0.4450441316 |

TS endo 0311

E(RB3LYP) = -706.411118782 A.U.

First frequency = -529.5474 cm<sup>-1</sup>

|   |               |               |               |
|---|---------------|---------------|---------------|
| H | -1.0297754606 | -0.4418392318 | -2.2129830926 |
| C | -0.7252263122 | -0.8706755451 | -1.2653738881 |
| H | 0.0949023186  | -1.5705879314 | -1.3494749168 |
| C | -1.621191462  | -0.9718721625 | -0.2047446464 |
| C | -1.1171835671 | -1.4265448691 | 1.0342138336  |
| C | 0.2042301367  | -1.7992810027 | 1.2166046106  |
| H | 0.5631095386  | -2.0213991337 | 2.2180037252  |
| H | 0.7429418707  | -2.3122365992 | 0.4290925711  |
| C | 1.4690139108  | -0.0481372039 | 0.589062883   |
| H | 1.2789837585  | 0.3892407415  | 1.5668941279  |
| C | 2.8172162653  | -0.7417743308 | 0.4790069947  |
| C | 0.8227183306  | 0.5646005193  | -0.4880992747 |
| H | 1.2977042014  | 0.5236265149  | -1.4650888894 |
| C | -0.0361458707 | 1.7796000261  | -0.2252624801 |
| C | -3.0821653816 | -0.4790759127 | -0.2884630353 |
| H | -1.7333274056 | -1.2958741573 | 1.9208211318  |
| C | -3.995109489  | -1.6988122691 | -0.01280147   |
| C | -3.4342567193 | 0.0786079016  | -1.6793050402 |
| C | -3.3947969839 | 0.620281906   | 0.7527359353  |
| H | -4.4598796084 | 0.8765286844  | 0.7216700522  |
| H | -2.8261404703 | 1.5303911529  | 0.5450676907  |
| H | -3.1629720257 | 0.3029763326  | 1.772993587   |
| H | -2.8295544802 | 0.9570460197  | -1.9279592645 |
| H | -4.4852895068 | 0.3849615915  | -1.7009845714 |
| H | -3.2893669612 | -0.6700918414 | -2.4644310103 |
| H | -5.0512230057 | -1.4121711361 | -0.0784115499 |
| H | -3.8189203485 | -2.1122507951 | 0.9848084997  |
| H | -3.8096314559 | -2.4949809374 | -0.7410272188 |
| H | -0.6522306227 | 1.574618193   | 0.6565330543  |
| H | -0.7294655677 | 1.9529813575  | -1.0576919541 |

|   |               |               |               |
|---|---------------|---------------|---------------|
| C | 0.7931714094  | 3.0561360158  | 0.0077709295  |
| H | 1.4579318709  | 2.8996840857  | 0.8682898004  |
| C | -0.0555748529 | 4.3164393442  | 0.236547999   |
| H | 1.449395998   | 3.2150995588  | -0.8584314147 |
| H | -0.715922096  | 4.4687269407  | -0.628453709  |
| H | 0.6090176225  | 5.1892924327  | 0.2691963922  |
| C | -0.8946837117 | 4.2796002243  | 1.5193133328  |
| H | -0.2600797073 | 4.107772036   | 2.3967444087  |
| H | -1.6442423543 | 3.4822605755  | 1.4945289344  |
| H | -1.4264530949 | 5.224408747   | 1.6721342044  |
| C | 3.1154546507  | -1.4360245351 | -0.8574809043 |
| H | 2.9147054899  | -1.4663979231 | 1.2959480373  |
| H | 3.6052237837  | 0.0068616749  | 0.6587037178  |
| H | 2.3266415095  | -2.1652487899 | -1.0870365059 |
| C | 4.4758170743  | -2.1510653892 | -0.8928749607 |
| H | 3.0874065907  | -0.6943572535 | -1.6645464597 |
| C | 4.5689597769  | -3.3701790596 | 0.0322278533  |
| H | 5.2671584609  | -1.4331880658 | -0.6367929775 |
| H | 4.6772608611  | -2.4708849343 | -1.9229813997 |
| H | 3.7803476922  | -4.0961901155 | -0.1980098497 |
| H | 4.4651335205  | -3.0935333177 | 1.0860752409  |
| H | 5.5324232147  | -3.8779762662 | -0.0795102335 |
| H | 5.5324232147  | -3.8779762662 | -0.0795102335 |

TS endo 0322

E(RB3LYP) = -706.411201701 A.U.

First frequency = -540.0395 cm<sup>-1</sup>

|   |               |               |               |
|---|---------------|---------------|---------------|
| H | -1.6021023723 | -0.9631227164 | -2.193595686  |
| C | -1.2813643005 | -1.2789974984 | -1.2073993984 |
| H | -0.7436836962 | -2.2197712555 | -1.2111236621 |
| C | -1.9912996807 | -0.8928551094 | -0.070896759  |
| C | -1.454001901  | -1.2543499287 | 1.1839252667  |
| C | -0.3012563359 | -2.0102538544 | 1.3143632719  |
| H | 0.1391112602  | -2.1508459657 | 2.2978105489  |
| H | -0.0930189826 | -2.8115417812 | 0.6157379583  |
| C | 1.3073494069  | -0.9557087552 | 0.1179948754  |
| H | 1.5166954488  | -0.3555104992 | 0.9951148137  |

|   |               |               |               |
|---|---------------|---------------|---------------|
| C | 2.2223813986  | -2.1441026103 | -0.0991177262 |
| C | 0.7102273461  | -0.3315009974 | -0.9826036362 |
| H | 0.9479337605  | -0.7591358986 | -1.9560460045 |
| C | 0.430444952   | 1.1641210913  | -1.0265887548 |
| C | -3.2561119741 | -0.0097674953 | -0.1297450362 |
| H | -1.8472514335 | -0.7675524841 | 2.0735823124  |
| C | -4.4198328069 | -0.8392374526 | 0.4666573899  |
| C | -3.6344334344 | 0.3805418157  | -1.5699263668 |
| C | -3.1067935566 | 1.2933962684  | 0.6861626112  |
| H | -2.8293595841 | 1.1028940626  | 1.7263997018  |
| H | -4.0542600711 | 1.844002801   | 0.6947652241  |
| H | -2.3464992405 | 1.9433494013  | 0.2481704328  |
| H | -2.8508543412 | 0.978332135   | -2.047688102  |
| H | -4.5491638196 | 0.9823230364  | -1.5626959171 |
| H | -3.820477993  | -0.4995402529 | -2.1933722254 |
| H | -5.3559244964 | -0.2695500729 | 0.4326826767  |
| H | -4.2239876748 | -1.1065559457 | 1.5094299208  |
| H | -4.5626277669 | -1.7683233375 | -0.0945223574 |
| H | -0.5333067738 | 1.3543079709  | -1.5143118273 |
| H | 1.1855845269  | 1.6258280437  | -1.6819550494 |
| C | 0.4545666988  | 1.8918999965  | 0.3219921397  |
| H | -0.2421850156 | 1.4046769902  | 1.0138923537  |
| C | 0.1107027154  | 3.3801257625  | 0.1989317436  |
| H | 1.4505924375  | 1.799202798   | 0.7745923327  |
| H | -0.8588484618 | 3.4942006532  | -0.3046202871 |
| H | 0.846265301   | 3.8673619054  | -0.4556948533 |
| C | 0.0683690215  | 4.0927074381  | 1.5532171597  |
| H | -0.6923470877 | 3.6472568959  | 2.2044981975  |
| H | -0.1666846203 | 5.1563507294  | 1.4433631545  |
| H | 1.0315809143  | 4.0146526152  | 2.0703401779  |
| C | 3.6057719533  | -1.7571092313 | -0.6600816935 |
| H | 1.7463879686  | -2.8455296454 | -0.7992874034 |
| H | 2.3619714771  | -2.6928876835 | 0.8411031919  |
| H | 4.1812338066  | -2.6735732642 | -0.8526260258 |
| C | 4.4176149126  | -0.8400425952 | 0.2619553959  |
| H | 3.4725087032  | -1.263920891  | -1.6325206687 |
| C | 5.8044443253  | -0.5127517335 | -0.298459678  |
| H | 4.5191712871  | -1.3166097378 | 1.2470362937  |



|   |              |               |               |
|---|--------------|---------------|---------------|
| H | 3.8617080785 | 0.0910982675  | 0.4289627045  |
| H | 6.3658238651 | 0.14513381    | 0.3730697075  |
| H | 5.7268207543 | -0.0103689906 | -1.2695748227 |
| H | 6.3964081107 | -1.423418395  | -0.4458877348 |
| H | 6.3964081107 | -1.423418395  | -0.4458877348 |

TS endo 0325

E(RB3LYP) = -706.412396377 A.U.

First frequency = -524.4746 cm<sup>-1</sup>

|   |               |               |               |
|---|---------------|---------------|---------------|
| H | -1.5669968851 | -0.3659456542 | -2.0980850272 |
| C | -1.2561284783 | -0.9488663235 | -1.2394253689 |
| H | -0.6382594724 | -1.8002388352 | -1.4933523854 |
| C | -1.9950912706 | -0.9421743934 | -0.0621788816 |
| C | -1.4705822966 | -1.6417735474 | 1.0485726758  |
| C | -0.312774349  | -2.4018437076 | 0.9765092011  |
| H | 0.0930333467  | -2.8390207136 | 1.8850722214  |
| H | -0.1046581916 | -2.976101784  | 0.0807369727  |
| C | 1.3226245343  | -1.099406351  | 0.2806610336  |
| H | 1.5060478769  | -0.820753832  | 1.315311212   |
| C | 2.2491995162  | -2.1521052801 | -0.2959986197 |
| C | 0.7936017099  | -0.1054018393 | -0.5445916592 |
| H | 1.0638934462  | -0.1210588781 | -1.5990696436 |
| C | 0.441037742   | 1.2385813852  | 0.0455499514  |
| C | -3.2892547798 | -0.1178914233 | 0.1181539569  |
| H | -1.8882402623 | -1.4379983271 | 2.0319705445  |
| C | -3.1236529742 | 0.9933627602  | 1.1781522733  |
| C | -4.4018911607 | -1.0897866108 | 0.5821872751  |
| C | -3.7597185567 | 0.5368419131  | -1.1936744223 |
| H | -4.710579327  | 1.0543111312  | -1.0286351976 |
| H | -3.9154706625 | -0.2075964298 | -1.9807741179 |
| H | -3.0456580618 | 1.2793936971  | -1.562066568  |
| H | -5.3517089904 | -0.5552436061 | 0.6989616531  |
| H | -4.1590955209 | -1.5552749716 | 1.5416629252  |
| H | -4.5473985612 | -1.8911183104 | -0.1493988199 |
| H | -2.7833065873 | 0.5963716756  | 2.1386736871  |
| H | -4.0795190729 | 1.5018349597  | 1.3486741117  |
| H | -2.400570706  | 1.7434139034  | 0.848406383   |

|   |               |               |               |
|---|---------------|---------------|---------------|
| H | 1.3382242186  | 1.6420211764  | 0.5365612593  |
| H | -0.2898024691 | 1.0869675912  | 0.852130472   |
| C | -0.0833633214 | 2.261816005   | -0.9651394981 |
| H | 0.6485184971  | 2.3676817432  | -1.7790702607 |
| C | -0.3779141044 | 3.6494498047  | -0.3750203064 |
| H | -0.9933044896 | 1.8648099254  | -1.4266140818 |
| H | -1.0916333652 | 3.5498381847  | 0.453873943   |
| H | -0.8836852231 | 4.2550870202  | -1.1377339075 |
| C | 0.865255818   | 4.401779805   | 0.1143355108  |
| H | 0.6070299198  | 5.4058150653  | 0.4665391724  |
| H | 1.6000241538  | 4.5093906274  | -0.6921925985 |
| H | 1.3575670732  | 3.8809063523  | 0.9416816198  |
| C | 3.6590194184  | -1.6216661661 | -0.6240987036 |
| H | 1.8042373852  | -2.5551723418 | -1.216755262  |
| H | 2.340360931   | -2.9977649884 | 0.3979115292  |
| H | 4.2386400596  | -2.4240859134 | -1.1018599811 |
| C | 4.4310856782  | -1.1050671036 | 0.5954937624  |
| H | 3.5745391135  | -0.8156517076 | -1.365426448  |
| C | 5.8460935973  | -0.6359419389 | 0.2458129263  |
| H | 4.4809861696  | -1.8987442083 | 1.3540322618  |
| H | 3.8751902029  | -0.2781778383 | 1.0547286673  |
| H | 6.4373865389  | -1.4515067823 | -0.186264649  |
| H | 6.3790903447  | -0.2688145304 | 1.1289860908  |
| H | 5.8197884738  | 0.1764439747  | -0.489560516  |
| H | 5.8197884738  | 0.1764439747  | -0.489560516  |

TS endo 0327

E(RB3LYP) = -706.411670819 A.U.

First frequency = -522.8169  $\text{cm}^{-1}$

|   |               |               |               |
|---|---------------|---------------|---------------|
| H | -1.3381654343 | -0.1350263032 | -2.1029710252 |
| C | -1.0283844942 | -0.7372749591 | -1.2577042098 |
| H | -0.3144496608 | -1.5096451929 | -1.5123800252 |
| C | -1.8381792018 | -0.8713964905 | -0.1358714004 |
| C | -1.3212020243 | -1.5898804103 | 0.966310378   |
| C | -0.0799709352 | -2.2076818413 | 0.9415703493  |
| H | 0.3059451138  | -2.6605597179 | 1.8511667755  |
| H | 0.265703873   | -2.6846992871 | 0.031437199   |

|   |               |               |               |
|---|---------------|---------------|---------------|
| C | 1.4327923818  | -0.6757163862 | 0.4702668195  |
| H | 1.4879311409  | -0.4174491186 | 1.5260936361  |
| C | 2.5413420617  | -1.5772279899 | -0.0339376485 |
| C | 0.8652029002  | 0.2786371204  | -0.3760856046 |
| H | 1.2284838665  | 0.3228628331  | -1.4016860955 |
| C | 0.2950531376  | 1.5553657463  | 0.1952928997  |
| C | -3.2215316081 | -0.1957776413 | -0.0073054283 |
| H | -1.8300264692 | -1.5074694199 | 1.9234025217  |
| C | -3.5747613895 | 0.669040256   | -1.230592072  |
| C | -3.3305210279 | 0.6962935792  | 1.2500351278  |
| C | -4.2710205498 | -1.3295142799 | 0.0998757171  |
| H | -4.2353475028 | -1.9758140674 | -0.7830899943 |
| H | -5.2819671696 | -0.9129833902 | 0.1803678474  |
| H | -4.0910181806 | -1.9559019384 | 0.9788802889  |
| H | -2.6310749938 | 1.5353482114  | 1.2033108731  |
| H | -3.1292672127 | 0.1429452201  | 2.1710726215  |
| H | -4.3425382854 | 1.1086987615  | 1.3308893633  |
| H | -3.5739619941 | 0.0836498271  | -2.1552265571 |
| H | -2.8780539115 | 1.5037849434  | -1.3513052469 |
| H | -4.5774005369 | 1.0915997608  | -1.1077472414 |
| H | 1.0441688113  | 2.0104586848  | 0.8583363437  |
| H | -0.5531218761 | 1.301127694   | 0.8451055809  |
| C | -0.1256972979 | 2.576924049   | -0.8666322191 |
| H | 0.7687311086  | 2.9071204689  | -1.4142972917 |
| C | -0.8632566195 | 3.8052625162  | -0.3150462505 |
| H | -0.7635316866 | 2.0782953841  | -1.6047417835 |
| H | -1.7895414814 | 3.4787344226  | 0.1768083211  |
| H | -1.1750357721 | 4.4362663328  | -1.1572352998 |
| C | -0.0372186649 | 4.6473019533  | 0.6638743351  |
| H | 0.2115269603  | 4.0864363494  | 1.5703815939  |
| H | -0.5823956751 | 5.5454505427  | 0.9719003118  |
| H | 0.9052053589  | 4.9692384895  | 0.205277973   |
| C | 3.9023571807  | -0.8591220732 | -0.0954132868 |
| H | 2.2870721608  | -1.939744305  | -1.0410895426 |
| H | 2.6246205023  | -2.4660459725 | 0.6016401363  |
| H | 3.7945865252  | 0.0345547435  | -0.7226925145 |
| C | 5.0496623324  | -1.7263729308 | -0.6366188912 |
| H | 4.1620493442  | -0.4965702844 | 0.9093525249  |

|   |              |               |               |
|---|--------------|---------------|---------------|
| C | 5.4134769014 | -2.9180963159 | 0.2566851423  |
| H | 5.9368867461 | -1.0934069579 | -0.7658270432 |
| H | 4.7852154366 | -2.0877875756 | -1.6400923646 |
| H | 4.5879918826 | -3.6320880988 | 0.3406586212  |
| H | 5.6666256582 | -2.5845836788 | 1.2699304797  |
| H | 6.276944823  | -3.4614881385 | -0.140709689  |
| H | 6.276944823  | -3.4614881385 | -0.140709689  |

TS endo 0335

E(RB3LYP) = -706.411629465 A.U.

First frequency = -524.5820  $\text{cm}^{-1}$

|   |               |               |               |
|---|---------------|---------------|---------------|
| H | -1.3567051339 | 0.4210937305  | -1.9688479411 |
| C | -1.1237312337 | -0.4098575509 | -1.3140450435 |
| H | -0.3441651433 | -1.057557656  | -1.6934388336 |
| C | -2.0573643302 | -0.88977759   | -0.4034420679 |
| C | -1.6414605697 | -1.9011392515 | 0.492089401   |
| C | -0.3783888975 | -2.4756619413 | 0.4372464104  |
| H | -0.0839665287 | -3.1809226292 | 1.2102001509  |
| H | 0.0806375024  | -2.6648712406 | -0.5268367614 |
| C | 1.1210666307  | -0.8839932347 | 0.6175609447  |
| H | 1.0895205578  | -0.9929266849 | 1.7000236789  |
| C | 2.3004227001  | -1.5446371401 | -0.0649309391 |
| C | 0.5825935107  | 0.2937600522  | 0.0953484807  |
| H | 1.0233747106  | 0.7009953241  | -0.8098602977 |
| C | -0.1377443467 | 1.2481493115  | 1.0174211571  |
| C | -3.4739238849 | -0.2908699751 | -0.2563245645 |
| H | -2.262736834  | -2.1136868591 | 1.3588787564  |
| C | -4.4845959134 | -1.4321099523 | -0.527737626  |
| C | -3.7450101344 | 0.8357639818  | -1.2697732147 |
| C | -3.7315920455 | 0.2731131972  | 1.1593102491  |
| H | -3.0912787097 | 1.1357308935  | 1.3637276065  |
| H | -3.5536032322 | -0.4715615865 | 1.939842831   |
| H | -4.7729527808 | 0.6025502929  | 1.2492881096  |
| H | -4.7722525245 | 1.1973465721  | -1.1549898998 |
| H | -3.6281649267 | 0.488025405   | -2.3009707803 |
| H | -3.0768797385 | 1.6884772404  | -1.1164005061 |
| H | -5.5130951992 | -1.0586294039 | -0.4608709238 |

|   |               |               |               |
|---|---------------|---------------|---------------|
| H | -4.3733716701 | -2.2463298595 | 0.1945436694  |
| H | -4.3364728268 | -1.8516049999 | -1.5280719157 |
| H | 0.5096362329  | 1.4748391946  | 1.8786385251  |
| H | -0.9928262854 | 0.7066541189  | 1.4418444089  |
| C | -0.5940453342 | 2.5725577959  | 0.3810679579  |
| H | -0.8920313804 | 2.3892495708  | -0.6585287424 |
| C | 0.4568706491  | 3.6954505426  | 0.4206830852  |
| H | -1.4937326189 | 2.9319123896  | 0.896061284   |
| H | 0.6830829113  | 3.9312303288  | 1.4696694529  |
| H | 0.0147811894  | 4.6049649158  | -0.0063380376 |
| C | 1.7643774415  | 3.3803279262  | -0.3143760743 |
| H | 1.576960413   | 3.1315462954  | -1.3656186195 |
| H | 2.2855720015  | 2.5310175078  | 0.1386720978  |
| H | 2.4452937386  | 4.2376006227  | -0.2913876872 |
| C | 3.6286544794  | -0.8180203083 | 0.2086085151  |
| H | 2.1263205897  | -1.5698985381 | -1.1507356159 |
| H | 2.3936319055  | -2.5904648097 | 0.2553346263  |
| H | 3.5461923401  | 0.2208714503  | -0.1384027521 |
| C | 4.83552125    | -1.4880495606 | -0.4572514724 |
| H | 3.7932642962  | -0.7625234088 | 1.2938846178  |
| C | 6.1509197146  | -0.7525220943 | -0.1854055558 |
| H | 4.663082163   | -1.547069002  | -1.5407101929 |
| H | 4.9133648536  | -2.5258809752 | -0.1055234949 |
| H | 6.361873912   | -0.7076312205 | 0.8891865066  |
| H | 6.1090119175  | 0.278206365   | -0.5556525468 |
| H | 6.9979220715  | -1.2476880763 | -0.6713877451 |
| H | 6.9979220715  | -1.2476880763 | -0.6713877451 |

TS endo 0336

E(RB3LYP) = -706.410397457 A.U.

First frequency = -525.8175 cm<sup>-1</sup>

|   |               |               |               |
|---|---------------|---------------|---------------|
| H | -1.8788156352 | -0.7367402481 | -2.1315599335 |
| C | -1.3824472362 | -1.1733431635 | -1.2722656104 |
| H | -0.7334782041 | -2.0036602315 | -1.5288541252 |
| C | -1.9762670233 | -1.1225148879 | -0.0106226969 |
| C | -1.2294010704 | -1.6215970538 | 1.0796153686  |
| C | 0.011057631   | -2.2170095864 | 0.9386692669  |

|   |               |               |               |
|---|---------------|---------------|---------------|
| H | 0.5812982449  | -2.4743474256 | 1.826405135   |
| H | 0.2405642557  | -2.8191091697 | 0.0687532663  |
| C | 1.3173312202  | -0.708864175  | -0.2570207133 |
| H | 1.5753805742  | -0.3063838849 | 0.7164768949  |
| C | 2.3055320077  | -1.6696327056 | -0.890735184  |
| C | 0.4305758149  | 0.0261298131  | -1.0461899127 |
| H | 0.5646966505  | -0.0347454913 | -2.1259185967 |
| C | -0.1022099908 | 1.3392058855  | -0.5229600609 |
| C | -3.3286842928 | -0.4273224992 | 0.2551446527  |
| H | -1.5619311063 | -1.3771417055 | 2.0859797161  |
| C | -3.214101045  | 0.7108950198  | 1.2955106408  |
| C | -4.2976921481 | -1.5037452763 | 0.803229862   |
| C | -3.9458288405 | 0.1659925308  | -1.0242245798 |
| H | -4.9138444073 | 0.6218890486  | -0.791864519  |
| H | -4.1144992027 | -0.6011723077 | -1.7864880112 |
| H | -3.3097965452 | 0.9450189816  | -1.4575067116 |
| H | -3.9281189511 | -1.9324250898 | 1.7396859112  |
| H | -4.4154005769 | -2.3221192703 | 0.0855691479  |
| H | -5.2862518959 | -1.0705648705 | 0.9957808492  |
| H | -4.2066441126 | 1.1215991358  | 1.512850658   |
| H | -2.5882719511 | 1.5258132878  | 0.9229737043  |
| H | -2.7892806424 | 0.3651670403  | 2.2417774379  |
| H | -0.4301910016 | 1.1896647793  | 0.5130062525  |
| H | -0.9898744132 | 1.6456679304  | -1.089663369  |
| C | 0.9361631624  | 2.4731022993  | -0.5608810668 |
| H | 1.8140969532  | 2.178515858   | 0.029577335   |
| C | 0.3876586531  | 3.80356935    | -0.0332326934 |
| H | 1.2949702507  | 2.6077142414  | -1.5911522402 |
| H | 0.0239820127  | 3.6603695626  | 0.9936155717  |
| H | -0.4895485873 | 4.0944555122  | -0.627339583  |
| C | 1.4240053023  | 4.9305379466  | -0.059664019  |
| H | 2.2966765435  | 4.6765634635  | 0.5529030624  |
| H | 1.0096771202  | 5.8692831559  | 0.3224226904  |
| H | 1.7804497493  | 5.113475058   | -1.0798754024 |
| C | 3.3401632818  | -2.2805331318 | 0.07448298    |
| H | 2.8425440149  | -1.1573178904 | -1.7031592478 |
| H | 1.7488125241  | -2.4770767997 | -1.390159472  |
| H | 2.8628350361  | -2.4761460233 | 1.0431440278  |

|   |              |               |               |
|---|--------------|---------------|---------------|
| C | 4.6019269935 | -1.4263958246 | 0.2875226299  |
| H | 3.6561463465 | -3.2574892846 | -0.3109777649 |
| C | 4.3571822899 | -0.0369513452 | 0.8865184224  |
| H | 5.1180489    | -1.3150382254 | -0.6761026037 |
| H | 5.2911179358 | -1.9807683495 | 0.9377309518  |
| H | 3.8297651225 | -0.1059508258 | 1.8451589018  |
| H | 3.7533119919 | 0.5874258834  | 0.2209950376  |
| H | 5.3030984795 | 0.4854653744  | 1.0639081349  |
| H | 5.3030984795 | 0.4854653744  | 1.0639081349  |

TS endo 0345

E(RB3LYP) = -706.410847670 A.U.

First frequency = -506.5657  $\text{cm}^{-1}$

|   |               |               |               |
|---|---------------|---------------|---------------|
| H | -1.8595649339 | -0.3520718972 | -2.1023573531 |
| C | -1.3209200281 | -0.807793346  | -1.2766219489 |
| H | -0.4605799348 | -1.387367031  | -1.5875494931 |
| C | -1.9811645283 | -1.1014925129 | -0.0870171201 |
| C | -1.2063387476 | -1.5934712905 | 0.9885265328  |
| C | 0.1398248278  | -1.8916713841 | 0.8743287576  |
| H | 0.6981144071  | -2.1645367358 | 1.7645385963  |
| H | 0.5404589141  | -2.2922229152 | -0.0491763182 |
| C | 1.184569418   | 0.0119447387  | 0.1023062456  |
| H | 1.3044004655  | 0.2785863008  | 1.1493445881  |
| C | 2.3972944849  | -0.5905168614 | -0.5793441809 |
| C | 0.2332059687  | 0.7107213271  | -0.6366375022 |
| H | 0.4282858702  | 0.8458825514  | -1.6983310673 |
| C | -0.6097917631 | 1.7674944403  | 0.0384616233  |
| C | -3.4913813815 | -0.8134060049 | 0.0644490831  |
| H | -1.6315582575 | -1.5796018231 | 1.9868148265  |
| C | -3.8777696297 | 0.5986239918  | -0.425565057  |
| C | -3.9795692867 | -0.9521900639 | 1.5189440789  |
| C | -4.2420938456 | -1.8589131186 | -0.7974264124 |
| H | -5.327202446  | -1.7271791425 | -0.7106598113 |
| H | -3.9939225858 | -2.8764138323 | -0.4781722609 |
| H | -3.9700428232 | -1.7644831676 | -1.8532036907 |
| H | -3.8146849282 | -1.9608121384 | 1.9104747349  |
| H | -5.0550782832 | -0.7529422404 | 1.5679448421  |

|   |               |               |               |
|---|---------------|---------------|---------------|
| H | -3.4793325304 | -0.2395222067 | 2.1831841159  |
| H | -3.5565451786 | 0.7847137736  | -1.453944056  |
| H | -3.4393739917 | 1.3710362772  | 0.2109615889  |
| H | -4.9667020705 | 0.7169391294  | -0.397486185  |
| H | -1.0954931488 | 1.3144272758  | 0.9129318444  |
| H | -1.4111671253 | 2.0895449496  | -0.6346375063 |
| C | 0.1899033201  | 3.0046507248  | 0.4934869056  |
| H | -0.4854505931 | 3.6859962172  | 1.0300406402  |
| C | 0.8614628643  | 3.7645886396  | -0.6558830756 |
| H | 0.9564093008  | 2.6966012127  | 1.2171384017  |
| H | 0.0989977824  | 4.0485360749  | -1.3947591126 |
| H | 1.5548749502  | 3.0919583581  | -1.1767257041 |
| C | 1.6141613345  | 5.0121733318  | -0.185700911  |
| H | 2.4008545535  | 4.749265424   | 0.5309361264  |
| H | 0.938314633   | 5.7169068576  | 0.3124194301  |
| H | 2.0871319288  | 5.5378736517  | -1.0217582179 |
| C | 3.3758513224  | -1.3076972918 | 0.3566634533  |
| H | 2.9431251384  | 0.2099080899  | -1.1017143248 |
| H | 2.0728635914  | -1.2809224103 | -1.3737857888 |
| H | 3.6715844181  | -0.6185148727 | 1.160565096   |
| C | 4.6307677322  | -1.8174547913 | -0.3600186971 |
| H | 2.8760238514  | -2.1505758596 | 0.8487189948  |
| C | 5.606950876   | -2.5306742617 | 0.5797342173  |
| H | 5.1380084146  | -0.9737851238 | -0.8476360842 |
| H | 4.3324555913  | -2.499769679  | -1.1678414099 |
| H | 5.943929136   | -1.8609808966 | 1.3792783771  |
| H | 6.494307642   | -2.8854663301 | 0.0455848623  |
| H | 5.133972734   | -3.3979736418 | 1.0545019252  |
| H | 5.133972734   | -3.3979736418 | 1.0545019252  |

TS endo 0347

E(RB3LYP) = -706.411652137 A.U.

First frequency = -524.3813  $\text{cm}^{-1}$

|   |               |               |               |
|---|---------------|---------------|---------------|
| H | -1.5716241985 | 0.2155074106  | -1.967085493  |
| C | -1.2746841318 | -0.5798627717 | -1.2942299713 |
| H | -0.5910802989 | -1.2920252109 | -1.7384583828 |
| C | -2.0786208023 | -0.9503086328 | -0.2225547999 |



|   |               |               |               |
|---|---------------|---------------|---------------|
| C | -1.5720642684 | -1.9190150332 | 0.6737468803  |
| C | -0.3578955848 | -2.5619494464 | 0.474934396   |
| H | 0.0231265302  | -3.224487902  | 1.2477647126  |
| H | -0.0556140609 | -2.838094665  | -0.5289149496 |
| C | 1.2157852287  | -1.0250216358 | 0.2957770675  |
| H | 1.3414508701  | -1.0659360511 | 1.3746840403  |
| C | 2.2398104177  | -1.7889509984 | -0.5206791339 |
| C | 0.64002655    | 0.1372354447  | -0.2194552023 |
| H | 0.9490718393  | 0.4678718948  | -1.2067582078 |
| C | 0.1083806938  | 1.1818829524  | 0.7329506569  |
| C | -3.431530473  | -0.2717978503 | 0.0876584992  |
| H | -2.0625501118 | -2.0399210814 | 1.6367431879  |
| C | -3.4540570776 | 0.3914660761  | 1.4834922877  |
| C | -4.5171592745 | -1.3751019232 | 0.045153608   |
| C | -3.802806053  | 0.8025118652  | -0.9505280468 |
| H | -3.8565769335 | 0.3861210726  | -1.9612980797 |
| H | -3.0831726804 | 1.6267399095  | -0.9557875081 |
| H | -4.7849464889 | 1.2238770715  | -0.711841121  |
| H | -4.3328460952 | -2.1473571248 | 0.7979565215  |
| H | -4.5363586508 | -1.8628633741 | -0.9347852919 |
| H | -5.5082915349 | -0.9468891188 | 0.2351058899  |
| H | -4.4567458672 | 0.7769382812  | 1.7003313003  |
| H | -2.7569177859 | 1.2326307298  | 1.5330336047  |
| H | -3.1925653281 | -0.3106410457 | 2.2798054821  |
| H | 0.883676384   | 1.4187189153  | 1.4778255618  |
| H | -0.7026957875 | 0.7176064457  | 1.3077310507  |
| C | -0.3648327376 | 2.4920171089  | 0.079773211   |
| H | -0.8105312082 | 2.267466663   | -0.8972988797 |
| C | 0.739382118   | 3.549620545   | -0.0919325478 |
| H | -1.1666940315 | 2.9328531052  | 0.6851364856  |
| H | 1.1099500581  | 3.8371484199  | 0.9016155692  |
| H | 0.2949936556  | 4.4555015931  | -0.5241627733 |
| C | 1.9246015416  | 3.1087221988  | -0.9583635209 |
| H | 2.4508812017  | 2.2567628912  | -0.5160929772 |
| H | 2.6492044259  | 3.9211386619  | -1.0765136556 |
| H | 1.5932970933  | 2.8093446979  | -1.959701941  |
| C | 3.5842681749  | -1.0487958009 | -0.6686785458 |
| H | 1.8345352221  | -1.9757911433 | -1.5253204623 |

|   |              |               |               |
|---|--------------|---------------|---------------|
| H | 2.4184272727 | -2.7746974101 | -0.07236155   |
| H | 4.2510961554 | -1.6436868821 | -1.3084852666 |
| C | 4.2896765646 | -0.7590358754 | 0.6608981487  |
| H | 3.412833251  | -0.1010688705 | -1.1968949748 |
| C | 5.6322971924 | -0.0469313638 | 0.4745196464  |
| H | 4.4411222231 | -1.7022863962 | 1.2040619983  |
| H | 3.6353373822 | -0.1445710617 | 1.2917969611  |
| H | 6.3194192233 | -0.6495127014 | -0.1306261543 |
| H | 6.1199242165 | 0.1526122529  | 1.4343251665  |
| H | 5.4983051094 | 0.9129697033  | -0.0376004367 |
| H | 5.4983051094 | 0.9129697033  | -0.0376004367 |

TS endo 0351

E(RB3LYP) = -706.412050019 A.U.

First frequency = -520.9193  $\text{cm}^{-1}$

|   |               |               |               |
|---|---------------|---------------|---------------|
| H | -1.5264421634 | -0.0715145258 | -2.1735905072 |
| C | -1.1742699609 | -0.75427688   | -1.4100776125 |
| H | -0.5567359458 | -1.5555933902 | -1.7946444129 |
| C | -1.8643497334 | -0.9117103186 | -0.2137049961 |
| C | -1.2890344294 | -1.7445688577 | 0.7732434895  |
| C | -0.1128275839 | -2.448870708  | 0.5668779905  |
| H | 0.3335227436  | -2.9921260749 | 1.395767379   |
| H | 0.0928340941  | -2.8818996937 | -0.4053946199 |
| C | 1.455024147   | -0.9936797877 | 0.0227456613  |
| H | 1.6325972007  | -0.8167542058 | 1.0808748487  |
| C | 2.4260588391  | -1.9372534312 | -0.6586355673 |
| C | 0.8782492333  | 0.05632204    | -0.6936487301 |
| H | 1.130969353   | 0.1463622863  | -1.7490231433 |
| C | 0.4836566719  | 1.3293746037  | 0.0174005814  |
| C | -3.1658435142 | -0.1482618461 | 0.1177306693  |
| H | -1.6813016623 | -1.6942547234 | 1.7858849552  |
| C | -3.5883276787 | 0.8178630828  | -1.003529955  |
| C | -3.056924751  | 0.6651167407  | 1.4273436775  |
| C | -4.2830532182 | -1.2074461441 | 0.2858382603  |
| H | -4.4012625836 | -1.7952627794 | -0.6301845275 |
| H | -5.2413575721 | -0.7245796657 | 0.5104116567  |
| H | -4.0540472755 | -1.9016686312 | 1.1000541014  |

|   |               |               |               |
|---|---------------|---------------|---------------|
| H | -2.3039883456 | 1.4534142294  | 1.3430673788  |
| H | -2.7931602927 | 0.0396994953  | 2.2843001064  |
| H | -4.0169484132 | 1.1425062943  | 1.6537346209  |
| H | -3.7382154261 | 0.2958218473  | -1.9536214011 |
| H | -2.8476906559 | 1.6080079024  | -1.1582883878 |
| H | -4.534620566  | 1.300813363   | -0.738545536  |
| H | 1.3405984036  | 1.682275194   | 0.6083963697  |
| H | -0.2988911839 | 1.0939806281  | 0.7510968366  |
| C | 0.0242078161  | 2.4498643545  | -0.9213116144 |
| H | 0.8689279426  | 2.7448986567  | -1.5603740694 |
| C | -0.529582384  | 3.6926591369  | -0.209932798  |
| H | -0.7410767667 | 2.0539578344  | -1.5978695984 |
| H | -1.4105651058 | 3.4076055779  | 0.3809970081  |
| H | -0.8904331422 | 4.4001109558  | -0.9675100797 |
| C | 0.4831058069  | 4.4017650353  | 0.6963665261  |
| H | 0.7953364094  | 3.7654100936  | 1.5304462457  |
| H | 0.0605727289  | 5.3178077172  | 1.1219118634  |
| H | 1.3840693588  | 4.6782226176  | 0.1360561494  |
| C | 3.8121540041  | -1.3080029289 | -0.9149313891 |
| H | 2.0064732601  | -2.2523155793 | -1.6241576122 |
| H | 2.5447456159  | -2.8520581774 | -0.0665183725 |
| H | 4.456700226   | -2.0609003381 | -1.3900861519 |
| C | 4.5144015265  | -0.7623424487 | 0.3384071707  |
| H | 3.6973360244  | -0.4913966785 | -1.6389157506 |
| C | 4.7467610954  | -1.8120614863 | 1.4303798387  |
| H | 3.9263477901  | 0.0679152281  | 0.7494282406  |
| H | 5.4784083663  | -0.3324604237 | 0.0385007884  |
| H | 3.8018124124  | -2.1905767994 | 1.834399739   |
| H | 5.3170610741  | -1.3947676684 | 2.2665682009  |
| H | 5.3056112851  | -2.670770955  | 1.0400578858  |
| H | 5.3056112851  | -2.670770955  | 1.0400578858  |

TS endo 0352

E(RB3LYP) = -706.412162494 A.U.

First frequency = -539.1632  $\text{cm}^{-1}$

|   |               |               |               |
|---|---------------|---------------|---------------|
| H | -1.2408095476 | 0.1173254777  | -2.0911533272 |
| C | -0.831570629  | -0.4724288883 | -1.2792266089 |

|   |               |               |               |
|---|---------------|---------------|---------------|
| H | -0.0577211281 | -1.1618432571 | -1.5929820483 |
| C | -1.5817549378 | -0.7317035985 | -0.1366533396 |
| C | -0.9437184591 | -1.4101994076 | 0.9261610733  |
| C | 0.3390009406  | -1.9268813413 | 0.8296219284  |
| H | 0.800438028   | -2.3556567144 | 1.714314796   |
| H | 0.6724791738  | -2.3662414442 | -0.1037208832 |
| C | 1.7251206269  | -0.2700129201 | 0.2295567163  |
| H | 1.9016421226  | -0.0956505766 | 1.2887234558  |
| C | 2.8052383092  | -1.042996376  | -0.5046563309 |
| C | 0.9658591964  | 0.683452917   | -0.4495401397 |
| H | 1.2127589858  | 0.8803299922  | -1.4913683397 |
| C | 0.3430779317  | 1.8191064331  | 0.3243943042  |
| C | -3.0244670993 | -0.2170540976 | 0.0640789045  |
| H | -1.4113392896 | -1.3866446346 | 1.9080683415  |
| C | -3.1223046143 | 0.7980598663  | 1.2242188611  |
| C | -3.9136864131 | -1.4408440151 | 0.3962971325  |
| C | -3.5981394465 | 0.4428015532  | -1.2036040054 |
| H | -3.0520155037 | 1.3493022714  | -1.480996757  |
| H | -4.6402623197 | 0.7314796864  | -1.0309203984 |
| H | -3.5769197541 | -0.2422837657 | -2.0569541006 |
| H | -3.8689985188 | -2.1830111907 | -0.4072589978 |
| H | -4.9580523595 | -1.1317806152 | 0.5202827991  |
| H | -3.5973998057 | -1.9320574536 | 1.3208764373  |
| H | -2.7261645595 | 0.3908570691  | 2.158740898   |
| H | -4.1681341566 | 1.075054606   | 1.3998023709  |
| H | -2.5692648279 | 1.7114579646  | 0.9938852439  |
| H | 1.1368816686  | 2.343921327   | 0.878477264   |
| H | -0.3187194466 | 1.3967667457  | 1.0938044403  |
| C | -0.4131897973 | 2.8388073225  | -0.5285031182 |
| H | 0.2421323293  | 3.1929810985  | -1.3370932799 |
| C | -0.9218790659 | 4.045106571   | 0.2676463614  |
| H | -1.25702921   | 2.3431184611  | -1.0209471974 |
| H | -0.0666504011 | 4.572743517   | 0.7111664277  |
| H | -1.5297366942 | 3.6957764708  | 1.1130965848  |
| C | -1.7438900242 | 5.0153228073  | -0.5851179066 |
| H | -2.0894969228 | 5.8743469838  | -0.0009437816 |
| H | -2.627094712  | 4.5178103841  | -1.0023031526 |
| H | -1.1541227087 | 5.3981875738  | -1.4259394529 |

|   |              |               |               |
|---|--------------|---------------|---------------|
| C | 3.6061774117 | -2.0205448387 | 0.3625003188  |
| H | 3.508293168  | -0.3265468145 | -0.9555773598 |
| H | 2.3620098679 | -1.5835601629 | -1.3557625925 |
| H | 4.0238130144 | -1.4768156717 | 1.2219373971  |
| C | 4.7423894526 | -2.709410102  | -0.4011211779 |
| H | 2.9411757855 | -2.7850223415 | 0.7817071538  |
| C | 5.5425655295 | -3.6828744142 | 0.4688477265  |
| H | 5.4154571118 | -1.94669328   | -0.8159332892 |
| H | 4.3235764028 | -3.245605004  | -1.2638007676 |
| H | 5.9970795514 | -3.1661259273 | 1.3219106951  |
| H | 6.3471840432 | -4.1622124869 | -0.0981046315 |
| H | 4.8984641871 | -4.4744045001 | 0.8687650586  |
| H | 4.8984641871 | -4.4744045001 | 0.8687650586  |

TS endo 0353

E(RB3LYP) = -706.409737931 A.U.

First frequency = -529.9447 cm<sup>-1</sup>

|   |               |               |               |
|---|---------------|---------------|---------------|
| H | -0.7868604375 | -0.6428311182 | -2.103389715  |
| C | -0.7083706117 | -1.1216607827 | -1.1342636337 |
| H | 0.0380115025  | -1.9041723363 | -1.09622188   |
| C | -1.7942426228 | -1.1588822144 | -0.2634131772 |
| C | -1.5747048227 | -1.6914122501 | 1.0260977939  |
| C | -0.3450884436 | -2.1830055311 | 1.4315881261  |
| H | -0.1996517769 | -2.4689621513 | 2.4699151271  |
| H | 0.292372      | -2.7121361844 | 0.7326204877  |
| C | 1.1523041393  | -0.5345565894 | 1.142755238   |
| H | 0.7972475649  | -0.0806548613 | 2.0658756467  |
| C | 2.4310965409  | -1.3437159583 | 1.3151054711  |
| C | 0.7931160245  | 0.1305256514  | -0.0347825803 |
| H | 1.4421658683  | 0.0346728112  | -0.8999904292 |
| C | 0.0337000932  | 1.4334540097  | 0.0663719114  |
| C | -3.1611259748 | -0.5223411869 | -0.5946592167 |
| H | -2.3337241821 | -1.5311365015 | 1.788193973   |
| C | -4.216492426  | -1.6545803568 | -0.5567905798 |
| C | -3.188279125  | 0.1118909311  | -1.9969331433 |
| C | -3.5652653025 | 0.5673866336  | 0.4247318927  |
| H | -4.5724207176 | 0.9369417368  | 0.200704045   |

|   |               |               |               |
|---|---------------|---------------|---------------|
| H | -2.8799846468 | 1.4181708273  | 0.3848942071  |
| H | -3.5752569025 | 0.1902976216  | 1.4509219637  |
| H | -4.18338747   | 0.5212543322  | -2.1997269139 |
| H | -2.9649096815 | -0.6218422015 | -2.7777927313 |
| H | -2.4697433134 | 0.9336164891  | -2.0833823559 |
| H | -4.2706811307 | -2.1167855567 | 0.4335022409  |
| H | -3.9694840741 | -2.4401176112 | -1.2782579108 |
| H | -5.2105712236 | -1.2628087508 | -0.8021001874 |
| H | -0.7635105688 | 1.3154683767  | 0.8103436247  |
| H | -0.4598542305 | 1.6691727149  | -0.8842077098 |
| C | 0.9273939565  | 2.6173230349  | 0.4744704944  |
| H | 1.4085108173  | 2.3915369135  | 1.4357000599  |
| C | 0.1579779853  | 3.9386798815  | 0.5813082265  |
| H | 1.743554729   | 2.7266903548  | -0.2539886431 |
| H | -0.6587635378 | 3.8211742073  | 1.3068466409  |
| H | -0.3224477126 | 4.1564145681  | -0.3824506961 |
| C | 1.0451613421  | 5.1173832627  | 0.9916105266  |
| H | 0.472898347   | 6.0482515638  | 1.0620115512  |
| H | 1.850968384   | 5.2748037745  | 0.2654906824  |
| H | 1.5119330983  | 4.9376090812  | 1.9668530279  |
| C | 3.06671779    | -1.9084415707 | 0.0291495596  |
| H | 2.2478463372  | -2.1639296557 | 2.019491582   |
| H | 3.1722145127  | -0.7011156211 | 1.8152498171  |
| H | 3.6079268336  | -2.8324278348 | 0.2687504367  |
| C | 4.0454978191  | -0.945564678  | -0.659956925  |
| H | 2.2813221861  | -2.2032069644 | -0.6797342083 |
| C | 4.5645327888  | -1.4814411226 | -1.996417921  |
| H | 4.8893797768  | -0.7604596828 | 0.0182622559  |
| H | 3.5671984983  | 0.0290704789  | -0.8119760386 |
| H | 3.7424202526  | -1.6290018225 | -2.7064271688 |
| H | 5.0638793425  | -2.4486538475 | -1.8668417067 |
| H | 5.2824269039  | -0.7941740217 | -2.4556461338 |
| H | 5.2824269039  | -0.7941740217 | -2.4556461338 |

TS endo 0359

E(RB3LYP) = -706.411533370 A.U.

First frequency = -522.8431  $\text{cm}^{-1}$

|   |               |               |               |
|---|---------------|---------------|---------------|
| H | -1.4117686401 | 0.1397587995  | -1.9877473665 |
| C | -1.0947517127 | -0.5537407662 | -1.2179941879 |
| H | -0.2803637254 | -1.1985246286 | -1.520679212  |
| C | -1.9568976034 | -0.9382007202 | -0.1983772597 |
| C | -1.4363198373 | -1.7538812041 | 0.8324248043  |
| C | -0.1419973171 | -2.2539387325 | 0.8105898797  |
| H | 0.2292635569  | -2.8011768307 | 1.6732077532  |
| H | 0.2905435034  | -2.5729244914 | -0.131359138  |
| C | 1.2546649349  | -0.5708328771 | 0.6677038669  |
| H | 1.2540264195  | -0.4948121735 | 1.753582677   |
| C | 2.4561924819  | -1.273628189  | 0.0702255649  |
| C | 0.6345055549  | 0.4688231928  | -0.0275694279 |
| H | 1.0328008702  | 0.7292972117  | -1.0045838613 |
| C | -0.0892413826 | 1.5415306927  | 0.7465211472  |
| C | -3.4083412406 | -0.420585803  | -0.0802090878 |
| H | -2.0058915045 | -1.8486606531 | 1.7541855593  |
| C | -3.6045678581 | 0.476277798   | 1.1627592648  |
| C | -4.3375997167 | -1.6532719724 | 0.0425682787  |
| C | -3.8532861286 | 0.3721993402  | -1.3233321277 |
| H | -3.2774469621 | 1.2930149504  | -1.4543030799 |
| H | -4.9053117583 | 0.6589902799  | -1.2223688188 |
| H | -3.7536866152 | -0.2247474538 | -2.2353518947 |
| H | -4.1189685319 | -2.2395138625 | 0.9395119025  |
| H | -4.2231881958 | -2.3136338475 | -0.8230686554 |
| H | -5.3856498978 | -1.3368616443 | 0.0964336231  |
| H | -3.2932307086 | -0.028060386  | 2.0820367909  |
| H | -4.6613745695 | 0.7454231576  | 1.2730909201  |
| H | -3.0318390899 | 1.4033802271  | 1.0758609083  |
| H | 0.6139374551  | 1.9920071009  | 1.4621217372  |
| H | -0.8533856115 | 1.0547518225  | 1.3671671229  |
| C | -0.730477035  | 2.6570332803  | -0.0882660671 |
| H | -1.5295011017 | 2.2304458735  | -0.7030936224 |
| C | 0.2360186437  | 3.4278669977  | -1.004195901  |
| H | -1.211777673  | 3.3685359688  | 0.5963482291  |
| H | -0.3288991615 | 4.2173773413  | -1.5158774591 |
| H | 0.6023457684  | 2.7643784872  | -1.7980003705 |
| C | 1.4311222586  | 4.0497923122  | -0.2740626529 |
| H | 2.0356961146  | 4.6599655182  | -0.9529080425 |

|   |              |               |               |
|---|--------------|---------------|---------------|
| H | 2.0859405844 | 3.2814011654  | 0.1498716617  |
| H | 1.099646946  | 4.6938193207  | 0.5489512695  |
| C | 3.7443487693 | -0.4374423883 | 0.1871320449  |
| H | 2.2656613522 | -1.4825350604 | -0.9931229679 |
| H | 2.6043227638 | -2.2460435325 | 0.5535340214  |
| H | 3.5675373608 | 0.5382870893  | -0.2828299742 |
| C | 4.9820745554 | -1.0907912613 | -0.4469523423 |
| H | 3.9433822899 | -0.2324907735 | 1.2486328963  |
| C | 5.4339324375 | -2.3837060311 | 0.2420542699  |
| H | 5.8083214103 | -0.3686665608 | -0.4280649421 |
| H | 4.778723062  | -1.2926240211 | -1.5078038924 |
| H | 4.6776712511 | -3.171559242  | 0.1670608038  |
| H | 5.6282351577 | -2.2120681883 | 1.3073104308  |
| H | 6.3548458775 | -2.7702255272 | -0.2065867143 |
| H | 6.3548458775 | -2.7702255272 | -0.2065867143 |

TS endo 0360

E(RB3LYP) = -706.410517459 A.U.

First frequency = -530.7754 cm<sup>-1</sup>

|   |               |               |               |
|---|---------------|---------------|---------------|
| H | -1.2774045372 | -0.7571207517 | -2.1748093074 |
| C | -0.9130991753 | -1.0306467004 | -1.1913685159 |
| H | -0.0355283518 | -1.6627355338 | -1.2143110816 |
| C | -1.7723893877 | -1.0747113136 | -0.0965567288 |
| C | -1.2009026871 | -1.3223328344 | 1.1706614944  |
| C | 0.15486654    | -1.5390486631 | 1.3521198476  |
| H | 0.5558482124  | -1.5970326198 | 2.3605195015  |
| H | 0.7255145195  | -2.0931373342 | 0.6165183312  |
| C | 1.2065734227  | 0.238180946   | 0.475702583   |
| H | 0.9694597579  | 0.7829338687  | 1.3853741417  |
| C | 2.6225103721  | -0.3171558183 | 0.4474020751  |
| C | 0.510062908   | 0.6278455244  | -0.673908946  |
| H | 0.9926633905  | 0.4697624267  | -1.63600105   |
| C | -0.4362915208 | 1.807984821   | -0.6275170831 |
| C | -3.2713394248 | -0.7170369409 | -0.1874343746 |
| H | -1.8067029521 | -1.1374232387 | 2.0547532229  |
| C | -3.7104315608 | -0.3896636813 | -1.6259621251 |
| C | -3.6368485468 | 0.4902617639  | 0.7064112764  |



|   |               |               |               |
|---|---------------|---------------|---------------|
| C | -4.0732802861 | -1.9521689592 | 0.2899891724  |
| H | -3.8328072295 | -2.2100103589 | 1.32571854    |
| H | -3.8487541268 | -2.8250577711 | -0.3315293383 |
| H | -5.1505265537 | -1.7572043737 | 0.2321439007  |
| H | -4.7172089262 | 0.6716783509  | 0.6723260815  |
| H | -3.1329425183 | 1.3985384405  | 0.3658892259  |
| H | -3.3643423203 | 0.3262080694  | 1.752533307   |
| H | -3.5203224754 | -1.225278837  | -2.3069367751 |
| H | -3.1951892936 | 0.4939623887  | -2.0166831152 |
| H | -4.7849186153 | -0.1799011019 | -1.6472402536 |
| H | -0.9619495324 | 1.8046564571  | 0.3334553315  |
| H | -1.2084435579 | 1.7065791004  | -1.39801093   |
| C | 0.2665164891  | 3.1679444766  | -0.841757033  |
| H | 0.7820162373  | 3.1416606793  | -1.811440216  |
| C | 1.269115651   | 3.5877082071  | 0.2440024055  |
| H | -0.5062901614 | 3.9449153882  | -0.9285681326 |
| H | 1.7674441381  | 4.5096243098  | -0.0820929881 |
| H | 2.0560082528  | 2.8287847859  | 0.3279513148  |
| C | 0.6344676235  | 3.8254042774  | 1.6184957382  |
| H | 1.3774584968  | 4.1738524059  | 2.343361605   |
| H | 0.1838915348  | 2.9135710296  | 2.0232682399  |
| H | -0.1562336066 | 4.5826376708  | 1.5599751123  |
| C | 3.000483774   | -1.1494232527 | -0.7859355321 |
| H | 2.7937139289  | -0.9089967464 | 1.353967683   |
| H | 3.3255672208  | 0.5285140174  | 0.515887851   |
| H | 2.2836560046  | -1.9710215262 | -0.9198658457 |
| C | 4.4203687045  | -1.7353426829 | -0.7246764051 |
| H | 2.9165470761  | -0.5244402937 | -1.6828805712 |
| C | 4.6078317838  | -2.8165434059 | 0.3461175516  |
| H | 5.1391410416  | -0.9215890102 | -0.5563613469 |
| H | 4.6671191136  | -2.1607440781 | -1.705540088  |
| H | 3.8939264332  | -3.6361006474 | 0.2024522828  |
| H | 4.4588326599  | -2.4228237141 | 1.3564254302  |
| H | 5.6159125623  | -3.241686001  | 0.3058330951  |
| H | 5.6159125623  | -3.241686001  | 0.3058330951  |

TS endo 0364

E(RB3LYP) = -706.410136357 A.U.

First frequency =  $-518.8728 \text{ cm}^{-1}$

|   |               |               |               |
|---|---------------|---------------|---------------|
| H | -1.790826363  | -0.0141555627 | -2.1347960305 |
| C | -1.2842643348 | -0.5859260322 | -1.3658395677 |
| H | -0.4221451537 | -1.1319835215 | -1.730666554  |
| C | -1.9735276058 | -1.0412817897 | -0.2449262906 |
| C | -1.2206473268 | -1.6804864549 | 0.7656619424  |
| C | 0.1364473362  | -1.9302378324 | 0.6535010586  |
| H | 0.6734338801  | -2.3249233387 | 1.5107418193  |
| H | 0.5712900852  | -2.1878499041 | -0.3049357041 |
| C | 1.144987699   | 0.0739912497  | 0.1835439913  |
| H | 1.2223779546  | 0.2239275051  | 1.2576435565  |
| C | 2.4049370067  | -0.3916812561 | -0.5172110156 |
| C | 0.2000954148  | 0.8364553799  | -0.5047218673 |
| H | 0.4294061796  | 1.1024052973  | -1.5337933211 |
| C | -0.689141196  | 1.784788159   | 0.2642637234  |
| C | -3.4735237588 | -0.7615974342 | -0.0107899462 |
| H | -1.6834451749 | -1.8281925768 | 1.7385822255  |
| C | -4.0978899666 | 0.073973442   | -1.1428398414 |
| C | -3.7393602047 | -0.0227674228 | 1.3208966255  |
| C | -4.1916597266 | -2.1327751656 | 0.032009798   |
| H | -4.0374524503 | -2.6813719749 | -0.902797943  |
| H | -5.2699382893 | -1.9993438127 | 0.1785573765  |
| H | -3.8129004157 | -2.7540245304 | 0.8493582289  |
| H | -4.8182118818 | 0.0827800737  | 1.48170969    |
| H | -3.3028944288 | 0.9794738738  | 1.3110127979  |
| H | -3.3321213693 | -0.5596259963 | 2.1818085704  |
| H | -5.1638972313 | 0.2278398179  | -0.9457704694 |
| H | -4.0088053651 | -0.4254539187 | -2.1126474652 |
| H | -3.6299166928 | 1.0609516116  | -1.2213580105 |
| H | -1.1561154695 | 1.2113075192  | 1.0739499429  |
| H | -1.5054302643 | 2.1395247506  | -0.3773176906 |
| C | 0.0162128716  | 3.0040310534  | 0.8973016419  |
| H | -0.7270923647 | 3.5201292925  | 1.5197285054  |
| C | 0.6229537851  | 4.0249905523  | -0.0817805016 |
| H | 0.7985965893  | 2.6537532056  | 1.5839678545  |
| H | 0.7515730439  | 4.9765834479  | 0.4500851313  |
| H | -0.0979234529 | 4.2267798397  | -0.8864507605 |

|   |              |               |               |
|---|--------------|---------------|---------------|
| C | 1.9767666917 | 3.6294551029  | -0.6858413618 |
| H | 2.7019498897 | 3.4013569652  | 0.1039327785  |
| H | 2.3886083814 | 4.4438217613  | -1.2916921671 |
| H | 1.9031471563 | 2.7453579609  | -1.323243186  |
| C | 3.363263012  | -1.2179278718 | 0.3470747043  |
| H | 2.9485248898 | 0.4926070857  | -0.8846456279 |
| H | 2.1381018428 | -0.9605878821 | -1.421680798  |
| H | 3.5956406603 | -0.6541565833 | 1.2618954633  |
| C | 4.6683268171 | -1.5729131773 | -0.3735039008 |
| H | 2.872541175  | -2.141494357  | 0.6764112909  |
| C | 5.6241151274 | -2.397257217  | 0.4934854387  |
| H | 5.1671891919 | -0.6490186477 | -0.6965607434 |
| H | 4.433414864  | -2.1277894435 | -1.2922393346 |
| H | 6.5480450754 | -2.6382764122 | -0.04212358   |
| H | 5.1609023142 | -3.3415253683 | 0.8019247732  |
| H | 5.8983945585 | -1.8524970109 | 1.4041691084  |
| H | 5.8983945585 | -1.8524970109 | 1.4041691084  |

TS endo 0365

E(RB3LYP) = -706.410174160 A.U.

First frequency = -542.4174  $\text{cm}^{-1}$

|   |               |               |               |
|---|---------------|---------------|---------------|
| H | -1.5248543616 | -1.2099686679 | -1.953433622  |
| C | -1.1209226369 | -1.3151971969 | -0.9529232072 |
| H | -0.446169851  | -2.1563579548 | -0.848052957  |
| C | -1.8352398875 | -0.8588809623 | 0.1543734236  |
| C | -1.1989693488 | -0.9330660294 | 1.4126855618  |
| C | 0.0609550716  | -1.4825260877 | 1.5813529097  |
| H | 0.557367396   | -1.399743881  | 2.544519836   |
| H | 0.358784939   | -2.3477187211 | 1.001295665   |
| C | 1.4434369416  | -0.417982126  | 0.1426709759  |
| H | 1.6090965014  | 0.3394071991  | 0.9010013166  |
| C | 2.5179399358  | -1.4808861643 | 0.0487803917  |
| C | 0.7132825544  | -0.0650347056 | -0.9974708029 |
| H | 0.9713078264  | -0.6022733661 | -1.9094639168 |
| C | 0.2057241339  | 1.3483197532  | -1.2454254915 |
| C | -3.2220424411 | -0.1901633298 | 0.0424481462  |
| H | -1.6258505547 | -0.3723421478 | 2.2412148612  |

|   |               |               |               |
|---|---------------|---------------|---------------|
| C | -3.2436373487 | 1.2337172417  | 0.6411523387  |
| C | -4.2196710541 | -1.0753164998 | 0.8293818991  |
| C | -3.7125993633 | -0.0928226717 | -1.4134673808 |
| H | -3.0496666907 | 0.5290477374  | -2.024584378  |
| H | -4.7078512611 | 0.3629642421  | -1.4394399312 |
| H | -3.7859854553 | -1.0783165071 | -1.8838450302 |
| H | -4.2397094247 | -2.0924809761 | 0.4250381741  |
| H | -5.2329742622 | -0.6611204003 | 0.7689437573  |
| H | -3.9437496234 | -1.1421814748 | 1.8860825454  |
| H | -2.612420101  | 1.9106549188  | 0.0617919501  |
| H | -2.8973000764 | 1.2538411556  | 1.6779869914  |
| H | -4.2640302082 | 1.6331627772  | 0.6280822585  |
| H | -0.7931717651 | 1.3166091858  | -1.6971757525 |
| H | 0.8559690589  | 1.8082433313  | -2.0061439541 |
| C | 0.166728805   | 2.2726866577  | -0.0234915726 |
| H | -0.4216163054 | 1.8026129143  | 0.7729103728  |
| C | -0.4053422997 | 3.6574109515  | -0.3454477983 |
| H | 1.1807984922  | 2.3977604372  | 0.377810684   |
| H | -1.3982510441 | 3.5493296881  | -0.8026901231 |
| H | 0.2231257057  | 4.1392246861  | -1.106948837  |
| C | -0.5081418245 | 4.5577090601  | 0.8884878037  |
| H | -1.1681448644 | 4.112606551   | 1.6418526136  |
| H | -0.9069254635 | 5.5456600981  | 0.6362875706  |
| H | 0.473401464   | 4.7020905123  | 1.3543350117  |
| C | 3.8181736781  | -0.9469882646 | -0.5819403292 |
| H | 2.1525702685  | -2.3227170157 | -0.5587411847 |
| H | 2.7342771614  | -1.8884448992 | 1.0426619811  |
| H | 3.5786787372  | -0.5253484611 | -1.5662210811 |
| C | 4.9252250692  | -2.0015799502 | -0.7356600816 |
| H | 4.192818483   | -0.1103081669 | 0.024654733   |
| C | 5.4690275461  | -2.5412967404 | 0.592301268   |
| H | 5.7522324855  | -1.5613766605 | -1.3073725995 |
| H | 4.5460531795  | -2.8356025842 | -1.3424325612 |
| H | 5.839077292   | -1.7252258377 | 1.224032154   |
| H | 6.2981760928  | -3.2369927446 | 0.427016191   |
| H | 4.7011930612  | -3.0762522686 | 1.1601714211  |
| H | 4.7011930612  | -3.0762522686 | 1.1601714211  |

TS endo 0383

E(RB3LYP) = -706.409293139 A.U.

First frequency = -528.9463 cm<sup>-1</sup>

|   |               |               |               |
|---|---------------|---------------|---------------|
| H | -0.9968834793 | -0.9028916219 | -2.0545379903 |
| C | -0.8622052469 | -1.237833012  | -1.032566585  |
| H | -0.0556229474 | -1.9495273648 | -0.9123607458 |
| C | -1.92584803   | -1.2421111166 | -0.1338985648 |
| C | -1.6408323618 | -1.5792215306 | 1.2071792873  |
| C | -0.366470288  | -1.9051453908 | 1.6392035915  |
| H | -0.1790077196 | -2.034457387  | 2.7018246643  |
| H | 0.3049006433  | -2.4662284274 | 0.9991918143  |
| C | 0.9598798604  | -0.181568084  | 1.0911275994  |
| H | 0.5636773365  | 0.3758479903  | 1.9364888953  |
| C | 2.3071996744  | -0.836019263  | 1.3732497361  |
| C | 0.555159981   | 0.2677091844  | -0.172150563  |
| H | 1.2098715787  | 0.070501168   | -1.0165196254 |
| C | -0.2614351769 | 1.5368977057  | -0.2967589192 |
| C | -3.341195545  | -0.7475657394 | -0.5000276994 |
| H | -2.3966666334 | -1.378344082  | 1.9628885719  |
| C | -3.4585040972 | -0.3491335805 | -1.9822368068 |
| C | -3.7672925749 | 0.468138277   | 0.3545298513  |
| C | -4.3254314323 | -1.9131131756 | -0.2372780344 |
| H | -4.0606179368 | -2.7885262475 | -0.8390661923 |
| H | -5.3491319466 | -1.6167288291 | -0.494066811  |
| H | -4.3167000368 | -2.2164752553 | 0.8138401465  |
| H | -3.1252053921 | 1.3306403758  | 0.1577293868  |
| H | -3.7233724044 | 0.2535076806  | 1.4257604701  |
| H | -4.7984691317 | 0.7541630441  | 0.1174992793  |
| H | -2.805471561  | 0.4942503437  | -2.2296229676 |
| H | -4.486546378  | -0.0445237387 | -2.2043003134 |
| H | -3.2066527201 | -1.1823741175 | -2.6459084682 |
| H | -0.943404054  | 1.607699919   | 0.5595239222  |
| H | -0.8905057374 | 1.5030688631  | -1.1929498048 |
| C | 0.6035594916  | 2.813528439   | -0.367031401  |
| H | 1.2777709246  | 2.7409463394  | -1.2328430298 |
| C | 1.431168369   | 3.1119961686  | 0.8880668033  |
| H | -0.0567065323 | 3.6686425286  | -0.5696567934 |

|   |              |               |               |
|---|--------------|---------------|---------------|
| H | 2.1274790222 | 2.2859320693  | 1.0727850918  |
| H | 0.7637048739 | 3.1476178591  | 1.7602233916  |
| C | 2.2117718482 | 4.4251932087  | 0.7808206653  |
| H | 2.7985256892 | 4.6198884609  | 1.6845905246  |
| H | 1.5377751626 | 5.2764361378  | 0.6303650194  |
| H | 2.9053294637 | 4.4014208195  | -0.0677852856 |
| C | 3.0154847744 | -1.4977865919 | 0.1751975427  |
| H | 2.1948996073 | -1.5699207468 | 2.1799627411  |
| H | 2.9753993826 | -0.0637523887 | 1.7855491832  |
| H | 3.6466862676 | -2.3191850402 | 0.5369808633  |
| C | 3.8983867657 | -0.5367354961 | -0.6354632672 |
| H | 2.2750044764 | -1.9660049436 | -0.4875075834 |
| C | 4.4910680096 | -1.1863190848 | -1.8882042066 |
| H | 4.7076951733 | -0.175173625  | 0.0131129655  |
| H | 3.3229855738 | 0.3530241114  | -0.9169659945 |
| H | 5.0869697089 | -2.0695992573 | -1.6306658886 |
| H | 5.1399065834 | -0.4934905844 | -2.433714184  |
| H | 3.6999072167 | -1.5124280254 | -2.5733755719 |
| H | 3.6999072167 | -1.5124280254 | -2.5733755719 |

TS endo 0386

E(RB3LYP) = -706.411361355 A.U.

First frequency = -512.7883  $\text{cm}^{-1}$

|   |               |               |               |
|---|---------------|---------------|---------------|
| H | -1.8628882064 | 0.1739786129  | -2.0010461985 |
| C | -1.3556424115 | -0.5448733103 | -1.3679396173 |
| H | -0.6597869401 | -1.1783812274 | -1.9055027233 |
| C | -1.9453288325 | -1.0002899315 | -0.1919050743 |
| C | -1.176910925  | -1.8523517365 | 0.6344043222  |
| C | 0.0872595815  | -2.2974046489 | 0.294745307   |
| H | 0.6685027693  | -2.8571960068 | 1.0212399991  |
| H | 0.3423602311  | -2.5004752865 | -0.7381529113 |
| C | 1.334555268   | -0.4027008456 | -0.1527251942 |
| H | 1.5444308221  | -0.3646088655 | 0.9116367618  |
| C | 2.4138881462  | -0.9838732767 | -1.0440726943 |
| C | 0.4418714777  | 0.5444154531  | -0.6539833453 |
| H | 0.5882898594  | 0.8663539026  | -1.6837768552 |
| C | -0.1582309577 | 1.5622418837  | 0.2877679453  |

|   |               |               |               |
|---|---------------|---------------|---------------|
| C | -3.3240657857 | -0.5116699333 | 0.300571453   |
| H | -1.5173437167 | -2.0265164099 | 1.6525196868  |
| C | -3.2549626018 | 0.1375693472  | 1.7019468829  |
| C | -4.2503193592 | -1.7504086079 | 0.3729823645  |
| C | -3.9617015072 | 0.5093639018  | -0.6589492642 |
| H | -3.3543319839 | 1.4163482151  | -0.746862595  |
| H | -4.9463409567 | 0.806518232   | -0.2833693838 |
| H | -4.1008797431 | 0.0920942278  | -1.6611914971 |
| H | -4.3351242131 | -2.2299438351 | -0.6075562762 |
| H | -5.2552722158 | -1.4616794583 | 0.7025429096  |
| H | -3.8648145578 | -2.4951903898 | 1.0758737838  |
| H | -2.8184236211 | -0.5321470506 | 2.4477693921  |
| H | -4.2627757729 | 0.3974285246  | 2.0451602859  |
| H | -2.6605026373 | 1.0546613508  | 1.6832157741  |
| H | -0.5271756431 | 1.032955419   | 1.1735661321  |
| H | -1.0305857667 | 2.0395129184  | -0.1717953357 |
| C | 0.8466789327  | 2.6414370118  | 0.7438988858  |
| H | 0.329165588   | 3.3415003911  | 1.414936072   |
| C | 1.5061625675  | 3.4309659236  | -0.3977498493 |
| H | 1.6326197035  | 2.1603723092  | 1.3402021901  |
| H | 2.1135872526  | 2.7474159472  | -1.0047987192 |
| H | 2.2063787252  | 4.1561523265  | 0.0358218042  |
| C | 0.5111137623  | 4.1667464515  | -1.3015667859 |
| H | -0.1321206454 | 4.8353854975  | -0.7174085528 |
| H | -0.1409265177 | 3.4681156258  | -1.8365085963 |
| H | 1.0289753925  | 4.7729054424  | -2.0519380728 |
| C | 3.2908191777  | -2.0870826269 | -0.4263630709 |
| H | 3.0688544669  | -0.1637733282 | -1.3718797809 |
| H | 1.9552389475  | -1.365738626  | -1.9682306462 |
| H | 2.7013018555  | -3.0005658628 | -0.2901426376 |
| C | 3.9509725551  | -1.7191791487 | 0.9134651607  |
| H | 4.0777466113  | -2.337690205  | -1.1502901615 |
| C | 4.7743636901  | -0.4273599699 | 0.8707179006  |
| H | 4.595460708   | -2.5522523581 | 1.2211671912  |
| H | 3.1830809241  | -1.6347055191 | 1.6928160637  |
| H | 4.1411235841  | 0.445184064   | 0.6790027341  |
| H | 5.5319614903  | -0.4676267223 | 0.0792517819  |
| H | 5.2922091352  | -0.2565379752 | 1.8199812445  |

H 5.2922091352 -0.2565379752 1.8199812445

TS endo 0388

E(RB3LYP) = -706.409087649 A.U.

First frequency = -542.1485 cm<sup>-1</sup>

H -1.6350412379 -1.5236830908 -1.8993220678  
C -1.295036386 -1.525408482 -0.8699718912  
H -0.5791114781 -2.309193154 -0.6533446479  
C -2.1015775317 -1.0205651011 0.1483730492  
C -1.5465725441 -0.9544855391 1.4443611402  
C -0.2679879951 -1.4041198136 1.7316132126  
H 0.1570025317 -1.2159477574 2.7140653679  
H 0.1188705088 -2.2919257891 1.2452415709  
C 1.1118883531 -0.345269388 0.3192235868  
H 1.1554094174 0.4792558196 1.02160481  
C 2.2816140676 -1.3049345663 0.3898972905  
C 0.4571857944 -0.1426084957 -0.9016360491  
H 0.8286098574 -0.736355473 -1.7359558592  
C -0.1486255392 1.1935063811 -1.3237602121  
C -3.496041223 -0.4095815131 -0.1058289794  
H -2.0568600233 -0.3558817175 2.1955291751  
C -3.5686310038 1.0724529206 0.3267442361  
C -4.5177912442 -1.2224826273 0.7260032858  
C -3.9133058696 -0.4914722719 -1.5853086028  
H -3.2427949088 0.0850280655 -2.2314425642  
H -4.9209478122 -0.0813596375 -1.7094823181  
H -3.9272070595 -1.5252118574 -1.9448765596  
H -4.5030129454 -2.278089773 0.4360380099  
H -5.5326993411 -0.8378773936 0.5714400106  
H -4.2958765729 -1.1678141438 1.7959388395  
H -3.2976393988 1.2093841664 1.3770505721  
H -4.5877934521 1.4541843503 0.1970503173  
H -2.8984089003 1.6918772448 -0.273832911  
H -1.1616129986 1.0357034265 -1.7060858025  
H 0.4307883228 1.5628638878 -2.1836271026  
C -0.181659547 2.3020558762 -0.2570288958  
H -0.9415543653 3.0426866414 -0.5387181851



|   |               |               |               |
|---|---------------|---------------|---------------|
| C | 1.1549092521  | 3.0361499012  | -0.0761689946 |
| H | -0.5187670113 | 1.885231507   | 0.7003315479  |
| H | 1.4030723811  | 3.5489569172  | -1.0154157949 |
| H | 1.9607027512  | 2.3117101733  | 0.089587493   |
| C | 1.1248980783  | 4.0474604508  | 1.0725618016  |
| H | 0.9254439591  | 3.5493327367  | 2.0285718253  |
| H | 0.3364421101  | 4.7939492087  | 0.9214849984  |
| H | 2.0762553793  | 4.5812220255  | 1.1667163143  |
| C | 3.5804907976  | -0.6926249725 | -0.1633162389 |
| H | 2.0463905446  | -2.2154462085 | -0.1809841073 |
| H | 2.4552307125  | -1.6270550136 | 1.4246516235  |
| H | 3.4176791633  | -0.3884581451 | -1.2059544325 |
| C | 4.7811543381  | -1.6418526011 | -0.0836294182 |
| H | 3.806967804   | 0.2304597566  | 0.3890745876  |
| C | 6.0681231765  | -1.0241663723 | -0.6380063033 |
| H | 4.5483643174  | -2.5644646084 | -0.6329358678 |
| H | 4.9365616023  | -1.9422683621 | 0.9615734123  |
| H | 6.9107898875  | -1.7201057136 | -0.5716171842 |
| H | 6.3393027378  | -0.1174597688 | -0.085183519  |
| H | 5.9483435741  | -0.7439076362 | -1.6907833389 |
| H | 5.9483435741  | -0.7439076362 | -1.6907833389 |

TS endo 0398

E(RB3LYP) = -706.410369719 A.U.

First frequency = -506.6874  $\text{cm}^{-1}$

|   |               |               |               |
|---|---------------|---------------|---------------|
| H | -1.4631824062 | -0.4308898941 | -2.27635189   |
| C | -1.0153254592 | -0.8614929469 | -1.3854545452 |
| H | -0.1720806123 | -1.5084165488 | -1.5936518535 |
| C | -1.7786174262 | -1.0407718692 | -0.2350211333 |
| C | -1.1166380078 | -1.5060007101 | 0.9244596172  |
| C | 0.2138305643  | -1.8839199637 | 0.9333107701  |
| H | 0.6875913366  | -2.1299294812 | 1.8785953046  |
| H | 0.6596056471  | -2.3603809768 | 0.0684100977  |
| C | 1.4210586202  | -0.0855973398 | 0.1346274411  |
| H | 1.4676831666  | 0.244437621   | 1.1694666276  |
| C | 2.6480820405  | -0.7952380469 | -0.4026702398 |
| C | 0.5733063997  | 0.6080608805  | -0.7254096278 |

|   |               |               |               |
|---|---------------|---------------|---------------|
| H | 0.8637217621  | 0.6644798116  | -1.7733230199 |
| C | -0.2542473092 | 1.7549102965  | -0.1994860516 |
| C | -3.2761608408 | -0.66133278   | -0.217955106  |
| H | -1.6130957424 | -1.405717695  | 1.8841818081  |
| C | -4.022387948  | -1.7182284309 | -1.0697699549 |
| C | -3.541976484  | 0.7348545002  | -0.8206782137 |
| C | -3.8767971622 | -0.6781182091 | 1.2005191836  |
| H | -3.8023398832 | -1.6667697074 | 1.6639677743  |
| H | -4.938961019  | -0.4163378418 | 1.1547428945  |
| H | -3.3840414338 | 0.0472129616  | 1.8565845144  |
| H | -3.1351701164 | 0.8367555794  | -1.8304693986 |
| H | -3.1078361645 | 1.5221194312  | -0.1995916517 |
| H | -4.6212264016 | 0.9128934243  | -0.8846500063 |
| H | -3.6689807172 | -1.7072514128 | -2.1054308561 |
| H | -5.1013143037 | -1.5225603352 | -1.0743285054 |
| H | -3.8584104918 | -2.7248433261 | -0.6714571959 |
| H | -0.8041309749 | 1.4117534099  | 0.6880110654  |
| H | -1.0066977401 | 2.0447310239  | -0.9397124369 |
| C | 0.5805068247  | 2.9929342047  | 0.1736975251  |
| H | 1.3284968569  | 2.7150016442  | 0.9280131757  |
| C | -0.2755518543 | 4.1498602692  | 0.7011178745  |
| H | 1.1483203304  | 3.3292404613  | -0.7052732363 |
| H | -0.844854069  | 3.806072462   | 1.5757707076  |
| H | -1.0220125444 | 4.42262907    | -0.0574740081 |
| C | 0.5500566024  | 5.3835737096  | 1.0768329169  |
| H | 1.104050978   | 5.7648119828  | 0.2113348729  |
| H | 1.2823557243  | 5.1444670945  | 1.8565180856  |
| H | -0.083199789  | 6.1946180943  | 1.4512321474  |
| C | 3.4999188499  | -1.499902574  | 0.6609042493  |
| H | 3.2846357917  | -0.0610741824 | -0.9204344217 |
| H | 2.3426586623  | -1.5099731181 | -1.1806914207 |
| H | 3.7275326447  | -0.7780672123 | 1.4569243067  |
| C | 4.8148159497  | -2.0833900075 | 0.1224016824  |
| H | 2.920342494   | -2.3022842632 | 1.1330238608  |
| C | 4.6233688458  | -3.218214516  | -0.8907039292 |
| H | 5.4076555603  | -2.4551307321 | 0.9676865428  |
| H | 5.4075217863  | -1.2795114447 | -0.3355552598 |
| H | 5.5846575176  | -3.6463139868 | -1.1927990341 |

|   |              |               |               |
|---|--------------|---------------|---------------|
| H | 4.1189673537 | -2.8722444048 | -1.7985876739 |
| H | 4.0175720387 | -4.0260298982 | -0.4633999339 |
| H | 4.0175720387 | -4.0260298982 | -0.4633999339 |

TS endo 0401

E(RB3LYP) = -706.410115002 A.U.

First frequency = -519.0935 cm<sup>-1</sup>

|   |               |               |               |
|---|---------------|---------------|---------------|
| H | -1.1357805327 | -0.3038534325 | -2.0715559051 |
| C | -0.8782207619 | -0.7992930124 | -1.1428975104 |
| H | 0.0342979424  | -1.3771382244 | -1.1956678732 |
| C | -1.8540941906 | -1.1199523042 | -0.205256305  |
| C | -1.4233665137 | -1.6483310738 | 1.0327867856  |
| C | -0.0892104347 | -1.8792907217 | 1.327313218   |
| H | 0.1904694353  | -2.1734456359 | 2.3354022849  |
| H | 0.586497562   | -2.2355882086 | 0.5589457134  |
| C | 0.990738163   | 0.0576516618  | 1.0483688324  |
| H | 0.6403352027  | 0.3643567551  | 2.0315380492  |
| C | 2.4247717979  | -0.4452598936 | 1.0400590695  |
| C | 0.4064658398  | 0.7142781134  | -0.0374475795 |
| H | 0.9795013557  | 0.804957755   | -0.9545444788 |
| C | -0.6216243759 | 1.791599633   | 0.2202711004  |
| C | -3.3511959119 | -0.8029992931 | -0.4115758606 |
| H | -2.1376684165 | -1.6942178906 | 1.8512056561  |
| C | -3.619369438  | -0.0833548938 | -1.7456253907 |
| C | -3.9342982922 | 0.0726800262  | 0.7210271463  |
| C | -4.1050336668 | -2.155300694  | -0.4298746975 |
| H | -3.728627899  | -2.7989183576 | -1.2315389801 |
| H | -5.1778509097 | -1.9970529474 | -0.5910438433 |
| H | -3.9800766634 | -2.6925124503 | 0.5152866302  |
| H | -3.7969286172 | -0.3783094393 | 1.707352146   |
| H | -5.0111310578 | 0.2106505095  | 0.5715374127  |
| H | -3.4695487451 | 1.0622801437  | 0.7351066645  |
| H | -3.1105710036 | 0.8852992984  | -1.7907654671 |
| H | -4.6928060215 | 0.1006730679  | -1.8586865401 |
| H | -3.2936573199 | -0.6817301714 | -2.6021757224 |
| H | -1.3720182814 | 1.3812875416  | 0.9063138697  |
| H | -1.1500348407 | 2.0384278862  | -0.7089582066 |

|   |               |               |               |
|---|---------------|---------------|---------------|
| C | -0.0723713008 | 3.0946657106  | 0.8414606145  |
| H | -0.9337534993 | 3.7444332627  | 1.0461802388  |
| C | 0.9416968515  | 3.8753312341  | -0.0162990932 |
| H | 0.3784244886  | 2.8690405872  | 1.8173754046  |
| H | 0.9260046544  | 4.9271258218  | 0.2968182671  |
| H | 0.6091393252  | 3.8701479354  | -1.0637966756 |
| C | 2.3893701263  | 3.3736931056  | 0.0713611123  |
| H | 2.739008774   | 3.383383779   | 1.110309512   |
| H | 3.0625796555  | 4.0111047225  | -0.5120986361 |
| H | 2.494880932   | 2.3503729728  | -0.2960415397 |
| C | 2.9657296953  | -0.9416670127 | -0.3065702463 |
| H | 2.5405948032  | -1.2451370344 | 1.7834528008  |
| H | 3.0722334975  | 0.3745310362  | 1.3893452962  |
| H | 2.3166479453  | -1.7325134497 | -0.7064676897 |
| C | 4.3996287258  | -1.4745586309 | -0.2085430903 |
| H | 2.9398603781  | -0.1286528408 | -1.0436666438 |
| C | 4.9508965618  | -1.9541964874 | -1.5540615057 |
| H | 4.4306299511  | -2.297919245  | 0.5178095192  |
| H | 5.0491346091  | -0.6869508112 | 0.1970634766  |
| H | 5.9744798325  | -2.3306045684 | -1.4587107249 |
| H | 4.9613608013  | -1.1404024664 | -2.288169344  |
| H | 4.3352610576  | -2.761775039  | -1.9665829175 |
| H | 4.3352610576  | -2.761775039  | -1.9665829175 |

TS endo 0409

E(RB3LYP) = -706.411251679 A.U.

First frequency = -539.7937  $\text{cm}^{-1}$

|   |               |               |               |
|---|---------------|---------------|---------------|
| H | -1.2765969161 | 0.4798896963  | -1.9401999579 |
| C | -0.8794072821 | -0.2464861643 | -1.2407711334 |
| H | -0.0369550163 | -0.8048617757 | -1.6295172959 |
| C | -1.6815427341 | -0.7885766785 | -0.2416313162 |
| C | -1.0655351625 | -1.6419486447 | 0.7009485454  |
| C | 0.2575929477  | -2.0470111299 | 0.5990288367  |
| H | 0.6903473027  | -2.6310327976 | 1.4060659851  |
| H | 0.6786858322  | -2.2592359899 | -0.3774002045 |
| C | 1.5514094491  | -0.2336160946 | 0.477899729   |
| H | 1.656073805   | -0.287267275  | 1.5595028847  |

|   |               |               |               |
|---|---------------|---------------|---------------|
| C | 2.7271052654  | -0.7566443287 | -0.3267342392 |
| C | 0.7645852983  | 0.8023463197  | -0.0280149466 |
| H | 1.0567616897  | 1.2426286628  | -0.9782265708 |
| C | -0.0111712778 | 1.6673764206  | 0.9347925905  |
| C | -3.1669416127 | -0.4089162006 | -0.0501404213 |
| H | -1.5963270832 | -1.8602026337 | 1.6250038655  |
| C | -3.4157137272 | 0.3180097982  | 1.2906365163  |
| C | -3.987354505  | -1.7224873684 | -0.0637432988 |
| C | -3.6985322749 | 0.4837062142  | -1.1866891271 |
| H | -3.1986096405 | 1.4563472492  | -1.2143944538 |
| H | -4.7674069857 | 0.6714879098  | -1.0402699681 |
| H | -3.5730014692 | 0.0066666006  | -2.1637943059 |
| H | -3.6996746042 | -2.3876801096 | 0.755440274   |
| H | -3.8358555879 | -2.2652846984 | -1.0023364283 |
| H | -5.0570777362 | -1.5062000981 | 0.0386703765  |
| H | -2.9213167154 | 1.2925864707  | 1.3095392792  |
| H | -3.0522827458 | -0.2620161431 | 2.1436331049  |
| H | -4.4890915014 | 0.4848024259  | 1.4368913729  |
| H | 0.6827176217  | 2.0741211414  | 1.6867630549  |
| H | -0.6951004354 | 1.0151848055  | 1.4944202216  |
| C | -0.7804135124 | 2.8314862496  | 0.3011923045  |
| H | -1.435332975  | 2.445529699   | -0.4882578917 |
| C | 0.1157980514  | 3.9316414424  | -0.2824716435 |
| H | -1.4403743461 | 3.2806123094  | 1.0556208627  |
| H | 0.7858736762  | 3.5034517776  | -1.0388083674 |
| H | 0.7666282998  | 4.323934423   | 0.510849454   |
| C | -0.6865256321 | 5.076653796   | -0.9070391011 |
| H | -1.3207875433 | 4.7120973202  | -1.7233765939 |
| H | -0.0318699019 | 5.8538451122  | -1.3146386665 |
| H | -1.343286701  | 5.5473463158  | -0.1663707665 |
| C | 3.5450806976  | -1.8548657048 | 0.3616698069  |
| H | 3.4003234676  | 0.0830483743  | -0.5558897731 |
| H | 2.3757755148  | -1.1181008826 | -1.3059481387 |
| H | 3.8722535225  | -1.4928213987 | 1.3468469819  |
| C | 4.7699333072  | -2.2906471483 | -0.4497250481 |
| H | 2.9134643708  | -2.7301912813 | 0.5550131004  |
| C | 5.5864706554  | -3.385362732  | 0.2428430634  |
| H | 5.4092107558  | -1.4175246675 | -0.6389448682 |

|   |              |               |               |
|---|--------------|---------------|---------------|
| H | 4.4411126465 | -2.6451469913 | -1.4362938472 |
| H | 6.4547779543 | -3.6799959949 | -0.3553501743 |
| H | 4.9788843421 | -4.2815032194 | 0.4134155651  |
| H | 5.9527474051 | -3.0456020244 | 1.218407173   |
| H | 5.9527474051 | -3.0456020244 | 1.218407173   |

TS endo 0410

E(RB3LYP) = -706.410529323 A.U.

First frequency = -508.0015  $\text{cm}^{-1}$

|   |               |               |               |
|---|---------------|---------------|---------------|
| H | -1.6644923329 | -0.4557600959 | -2.1439070577 |
| C | -1.1509045278 | -0.8628132338 | -1.2776166661 |
| H | -0.371557698  | -1.5715222891 | -1.5290150307 |
| C | -1.7991542552 | -0.9284548999 | -0.0472081128 |
| C | -1.0468455863 | -1.3656122113 | 1.0669864447  |
| C | 0.2550895749  | -1.8223454794 | 0.9658939929  |
| H | 0.8098321316  | -2.0426617972 | 1.8727097314  |
| H | 0.5807597199  | -2.3753335434 | 0.0929723076  |
| C | 1.4706554084  | -0.1538575777 | -0.0611002452 |
| H | 1.6438427423  | 0.2307734772  | 0.9409484562  |
| C | 2.5957389151  | -0.9644842508 | -0.6735743452 |
| C | 0.5773333778  | 0.5416999076  | -0.8721118599 |
| H | 0.7586400864  | 0.5228182686  | -1.9455957092 |
| C | -0.1336318022 | 1.7595579743  | -0.335619262  |
| C | -3.2632305355 | -0.45542973   | 0.0956461586  |
| H | -1.4346701109 | -1.1805271426 | 2.0634389098  |
| C | -3.5064729018 | 0.9280291931  | -0.5455504609 |
| C | -3.7197340323 | -0.3740134789 | 1.5646283862  |
| C | -4.151304369  | -1.4985328776 | -0.6273179191 |
| H | -4.0069639539 | -2.4955649224 | -0.1984898389 |
| H | -3.9038729887 | -1.5539767343 | -1.6918578658 |
| H | -5.2120136223 | -1.2360384419 | -0.5360188729 |
| H | -3.1257824461 | 0.3495030417  | 2.1330051983  |
| H | -3.6527331237 | -1.343954691  | 2.0671303708  |
| H | -4.7654150843 | -0.0524412067 | 1.6089129789  |
| H | -4.5751263802 | 1.1682909719  | -0.5180143447 |
| H | -3.1915250907 | 0.9632759505  | -1.592056822  |
| H | -2.9721730354 | 1.7126668521  | -0.003966903  |

|   |               |               |               |
|---|---------------|---------------|---------------|
| H | -0.5958294586 | 1.4987676754  | 0.6271236938  |
| H | -0.948405126  | 2.0341902018  | -1.0093993224 |
| C | 0.7950173286  | 2.9714342532  | -0.132001274  |
| H | 1.6365030201  | 2.6716588691  | 0.5048102082  |
| C | 0.094298842   | 4.1874291558  | 0.4940830169  |
| H | 1.2320173681  | 3.25941683    | -1.098730408  |
| H | 0.8449736726  | 4.9625181538  | 0.6951179701  |
| H | -0.3163930065 | 3.8995929551  | 1.4718945617  |
| C | -1.0221082406 | 4.7852861285  | -0.3704017145 |
| H | -0.6461558558 | 5.0546113732  | -1.3645456605 |
| H | -1.4345612031 | 5.6908080695  | 0.0865002793  |
| H | -1.8499747335 | 4.0826766187  | -0.5101004842 |
| C | 3.5159367587  | -1.6611185157 | 0.3345174647  |
| H | 3.2101713484  | -0.2996006774 | -1.2995178716 |
| H | 2.1803626653  | -1.7097172361 | -1.3700937125 |
| H | 3.902095948   | -0.9136668932 | 1.0422670891  |
| C | 4.6924320318  | -2.3873859969 | -0.3263918004 |
| H | 2.9426641143  | -2.3782798334 | 0.9339454437  |
| C | 5.6099370723  | -3.081109556  | 0.684393422   |
| H | 5.274269529   | -1.6697071664 | -0.9207179479 |
| H | 4.3043319366  | -3.1274797108 | -1.0396857194 |
| H | 6.0349136485  | -2.3587305982 | 1.3907200806  |
| H | 6.4417632091  | -3.5924130207 | 0.1891704218  |
| H | 5.0593960915  | -3.8274815686 | 1.2684851668  |
| H | 5.0593960915  | -3.8274815686 | 1.2684851668  |

TS endo 0413

E(RB3LYP) = -706.410745238 A.U.

First frequency = -526.0435  $\text{cm}^{-1}$

|   |               |               |               |
|---|---------------|---------------|---------------|
| H | -1.3847693732 | 0.3418681686  | -1.9131967911 |
| C | -1.1273796482 | -0.5091506641 | -1.2937925652 |
| H | -0.5002771873 | -1.2353928932 | -1.7951515281 |
| C | -1.9414023148 | -0.8950184041 | -0.2341242795 |
| C | -1.4849600872 | -1.9443020035 | 0.5951873803  |
| C | -0.325220659  | -2.6593395455 | 0.3308568392  |
| H | 0.0234856986  | -3.390192507  | 1.0558698635  |
| H | -0.0660629912 | -2.8984007652 | -0.6943360723 |

|   |               |               |               |
|---|---------------|---------------|---------------|
| C | 1.3548179137  | -1.2285598521 | 0.1968756536  |
| H | 1.4889869031  | -1.3538336724 | 1.2674573349  |
| C | 2.2933113815  | -2.0205533521 | -0.6912997451 |
| C | 0.8518646781  | 0.0022225303  | -0.228907705  |
| H | 1.1765864498  | 0.3756152693  | -1.1967799246 |
| C | 0.4358480575  | 1.0161009565  | 0.8078645539  |
| C | -3.2430108304 | -0.1528055917 | 0.1436445576  |
| H | -1.9624447388 | -2.0836851451 | 1.5625690012  |
| C | -3.1421965361 | 0.5329862724  | 1.5247641146  |
| C | -4.381856913  | -1.2011342715 | 0.189158377   |
| C | -3.634029251  | 0.9152819458  | -0.8944916269 |
| H | -2.8987610749 | 1.7234438525  | -0.9498068631 |
| H | -4.5927546253 | 1.3664280917  | -0.617883884  |
| H | -3.7430387306 | 0.4825882432  | -1.8939739505 |
| H | -4.1982842189 | -1.966290284  | 0.9488076343  |
| H | -4.4822584386 | -1.7076454277 | -0.7761798604 |
| H | -5.337143614  | -0.7175517005 | 0.4238357519  |
| H | -2.8504005997 | -0.1702573913 | 2.3099662965  |
| H | -4.1110351022 | 0.961323058   | 1.8063029076  |
| H | -2.4106603512 | 1.3453284876  | 1.5095093596  |
| H | 1.2831494847  | 1.1954456862  | 1.488301416   |
| H | -0.3439678409 | 0.5578880205  | 1.4301592213  |
| C | -0.0371725968 | 2.365924745   | 0.2591513561  |
| H | -0.8430913377 | 2.2018852026  | -0.4653501717 |
| C | 1.0745256982  | 3.1921824108  | -0.4014221425 |
| H | -0.4740259567 | 2.9549007245  | 1.0768945797  |
| H | 1.5246720385  | 2.6202599906  | -1.2228466592 |
| H | 1.8795523721  | 3.3579909983  | 0.3275818869  |
| C | 0.5741248018  | 4.5371567397  | -0.9353700919 |
| H | -0.20912524   | 4.3937868557  | -1.6887136966 |
| H | 1.3812656022  | 5.113827779   | -1.3987364795 |
| H | 0.1475371008  | 5.1464308516  | -0.1302331451 |
| C | 3.6817083047  | -1.3875675477 | -0.9301794547 |
| H | 1.819431384   | -2.1537663049 | -1.6751105685 |
| H | 2.4303559917  | -3.0295068033 | -0.281528706  |
| H | 4.1977447615  | -2.0083295473 | -1.6748068274 |
| C | 4.5930713639  | -1.2514712904 | 0.3028564931  |
| H | 3.5518348498  | -0.3998705683 | -1.392608084  |



|   |              |               |              |
|---|--------------|---------------|--------------|
| C | 4.27419496   | -0.0719618363 | 1.2309979484 |
| H | 5.6266343473 | -1.1391710205 | -0.049196872 |
| H | 4.571949718  | -2.1900660954 | 0.8741352718 |
| H | 3.3044346261 | -0.1815438304 | 1.7209850214 |
| H | 4.2496516971 | 0.8692211929  | 0.6695722742 |
| H | 5.0342613827 | 0.0256337829  | 2.0136662362 |
| H | 5.0342613827 | 0.0256337829  | 2.0136662362 |

TS endo 0414

E(RB3LYP) = -706.409697697 A.U.

First frequency = -540.8066 cm<sup>-1</sup>

|   |               |               |               |
|---|---------------|---------------|---------------|
| H | -1.3655419448 | -0.6325623677 | -2.2344997357 |
| C | -1.1114085537 | -1.0535961948 | -1.2683900031 |
| H | -0.4528881699 | -1.9114898908 | -1.3327341226 |
| C | -1.9818259884 | -0.9293408531 | -0.1863476981 |
| C | -1.5352047187 | -1.4082387833 | 1.064753524   |
| C | -0.309952347  | -2.0314270436 | 1.2322120704  |
| H | 0.0396936946  | -2.2656679267 | 2.2341292699  |
| H | 0.0750024047  | -2.6897417904 | 0.4626930928  |
| C | 1.2596202073  | -0.6332670966 | 0.402221689   |
| H | 1.3090433233  | -0.1481189428 | 1.3708461202  |
| C | 2.3433366698  | -1.6574880625 | 0.1393025653  |
| C | 0.7047159773  | 0.0775969889  | -0.6675562868 |
| H | 1.095974848   | -0.172529896  | -1.6530903108 |
| C | 0.2412063527  | 1.5230227167  | -0.5474642675 |
| C | -3.3396420541 | -0.2015109467 | -0.2799130324 |
| H | -2.0816950587 | -1.1103368113 | 1.9567673199  |
| C | -4.4391119789 | -1.2397017839 | 0.0531916866  |
| C | -3.6143084434 | 0.3520638574  | -1.6898062991 |
| C | -3.4481321385 | 0.9739393998  | 0.7159353405  |
| H | -2.7330357858 | 1.7613110615  | 0.4692456373  |
| H | -3.2636257003 | 0.6627176734  | 1.7476342758  |
| H | -4.4533163343 | 1.408994085   | 0.6790174351  |
| H | -4.5969102726 | 0.8346362472  | -1.7135865159 |
| H | -3.6150593097 | -0.4408937025 | -2.4442008245 |
| H | -2.8720020433 | 1.1021004938  | -1.9831707579 |
| H | -5.4335355177 | -0.7832965971 | -0.0161170992 |

|   |               |               |               |
|---|---------------|---------------|---------------|
| H | -4.3183985263 | -1.6356843202 | 1.0660178764  |
| H | -4.3997747254 | -2.084529667  | -0.6419865702 |
| H | -0.6891949523 | 1.6722623621  | -1.1093838751 |
| H | 0.9928662653  | 2.145519649   | -1.0539888377 |
| C | 0.0442718445  | 2.0472378513  | 0.8811179279  |
| H | -0.638060729  | 1.3778413797  | 1.4161241653  |
| C | -0.491567721  | 3.486149496   | 0.9426490306  |
| H | 1.0004007226  | 2.0082780024  | 1.4196033949  |
| H | -0.7310084491 | 3.7274234016  | 1.9860262742  |
| H | -1.4396018837 | 3.5501062121  | 0.3916677803  |
| C | 0.4798589319  | 4.5394723667  | 0.3964518638  |
| H | 1.4420530968  | 4.493412241   | 0.9199251509  |
| H | 0.0792162832  | 5.550515402   | 0.5230224142  |
| H | 0.6776185372  | 4.3967292431  | -0.6706718238 |
| C | 3.7197296737  | -1.0139613657 | -0.1053254021 |
| H | 2.074056865   | -2.2616374028 | -0.7399693743 |
| H | 2.4245386644  | -2.3580921611 | 0.9803013181  |
| H | 3.6486236361  | -0.3298894346 | -0.9616292355 |
| C | 4.8319273984  | -2.03861716   | -0.3548563306 |
| H | 3.984453259   | -0.3893468515 | 0.7594333626  |
| C | 6.1971489717  | -1.3899963445 | -0.6011479631 |
| H | 4.559831677   | -2.6637106615 | -1.2164801245 |
| H | 4.8966904532  | -2.719320153  | 0.504981184   |
| H | 6.9745187109  | -2.140605946  | -0.7776185057 |
| H | 6.5061932608  | -0.7848137671 | 0.2587989397  |
| H | 6.1668085938  | -0.7287287206 | -1.4746896608 |
| H | 6.1668085938  | -0.7287287206 | -1.4746896608 |

TS endo 0416

E(RB3LYP) = -706.409984149 A.U.

First frequency = -508.7761  $\text{cm}^{-1}$

|   |               |               |               |
|---|---------------|---------------|---------------|
| H | -1.5873991912 | -0.4577456061 | -2.2624557268 |
| C | -1.1541042078 | -0.908303493  | -1.3741457947 |
| H | -0.3549018501 | -1.6069849053 | -1.5891133842 |
| C | -1.9131179974 | -1.0355754748 | -0.2135673611 |
| C | -1.2659047327 | -1.5318080051 | 0.9411234838  |
| C | 0.0395404765  | -1.9890843752 | 0.9375754143  |

|   |               |               |               |
|---|---------------|---------------|---------------|
| H | 0.5075920049  | -2.256359737  | 1.8799831677  |
| H | 0.4455813521  | -2.4985004532 | 0.0719845089  |
| C | 1.3447164893  | -0.2752977697 | 0.0992526799  |
| H | 1.4324796658  | 0.0528856853  | 1.1318641035  |
| C | 2.5138910031  | -1.0628185419 | -0.459243362  |
| C | 0.5231950192  | 0.4663286319  | -0.7462711417 |
| H | 0.798490717   | 0.5061978207  | -1.7990433617 |
| C | -0.2247558273 | 1.660869853   | -0.2073735036 |
| C | -3.3851930317 | -0.5678468304 | -0.1816573679 |
| H | -1.7440570861 | -1.396082776  | 1.9057843206  |
| C | -4.2026026153 | -1.5821036568 | -1.0198991981 |
| C | -3.5746438051 | 0.8391704134  | -0.7880105293 |
| C | -3.9694906691 | -0.543017421  | 1.2435016844  |
| H | -3.9474725624 | -1.5322304212 | 1.7112017135  |
| H | -5.0150259832 | -0.2198568274 | 1.2082091871  |
| H | -3.427781356  | 0.1552836779  | 1.8902309755  |
| H | -3.1747556154 | 0.9124076629  | -1.8030233884 |
| H | -3.0867757534 | 1.601578214   | -0.1758663015 |
| H | -4.6420456462 | 1.0810831958  | -0.8399950203 |
| H | -3.860699372  | -1.5970804698 | -2.059375107  |
| H | -5.2678930203 | -1.3222977426 | -1.0139488374 |
| H | -4.0947396957 | -2.5949038038 | -0.6181272591 |
| H | -0.7781155922 | 1.3523550412  | 0.6906062294  |
| H | -0.9715459746 | 1.9946929532  | -0.9346151951 |
| C | 0.6898224656  | 2.846635925   | 0.1480325184  |
| H | 1.4331884107  | 2.5248066602  | 0.8893525918  |
| C | -0.0848587945 | 4.0539063915  | 0.6882011604  |
| H | 1.2609704912  | 3.1469746715  | -0.7417466926 |
| H | -0.6582529608 | 3.7462423357  | 1.57356584    |
| H | -0.8268121849 | 4.3708602424  | -0.0575365286 |
| C | 0.8208473784  | 5.2354675691  | 1.0466201081  |
| H | 1.5510497528  | 4.9529829544  | 1.813660283   |
| H | 0.244897143   | 6.0839230913  | 1.430524271   |
| H | 1.3814732835  | 5.5814117763  | 0.1706290195  |
| C | 3.3645282606  | -1.7758875368 | 0.5989113541  |
| H | 3.1532659825  | -0.3763610186 | -1.0309267531 |
| H | 2.1517131522  | -1.7987225755 | -1.1950113157 |
| H | 3.7407348319  | -1.0293483459 | 1.3131337582  |

|   |              |               |               |
|---|--------------|---------------|---------------|
| C | 4.5483085442 | -2.5704203927 | 0.0262646886  |
| H | 2.7289772565 | -2.4560457385 | 1.1765545562  |
| C | 5.6186701601 | -1.7081789306 | -0.6531841107 |
| H | 4.1697224591 | -3.314964745  | -0.6877434978 |
| H | 5.0142397778 | -3.1405115609 | 0.8399720457  |
| H | 6.0014350826 | -0.9455206169 | 0.0351469489  |
| H | 5.2273528386 | -1.1905613363 | -1.5347001479 |
| H | 6.4672612606 | -2.3173614028 | -0.9810776967 |
| H | 6.4672612606 | -2.3173614028 | -0.9810776967 |

TS endo 0428

E(RB3LYP) = -706.410739273 A.U.

First frequency = -511.9232  $\text{cm}^{-1}$

|   |               |               |               |
|---|---------------|---------------|---------------|
| H | -1.1212570573 | -0.3006571144 | -2.1096715762 |
| C | -0.8616591609 | -0.8178467355 | -1.1910963142 |
| H | 0.0505944225  | -1.393125826  | -1.2566695887 |
| C | -1.8455156779 | -1.1482620948 | -0.2653766147 |
| C | -1.4305489581 | -1.7105802132 | 0.963398865   |
| C | -0.1048942614 | -1.9988472111 | 1.2455743739  |
| H | 0.1669017408  | -2.3267217696 | 2.2452091851  |
| H | 0.5547657533  | -2.3597753983 | 0.4653217706  |
| C | 1.0514418892  | -0.0958538842 | 1.043764214   |
| H | 0.7194598091  | 0.1653555877  | 2.0462185479  |
| C | 2.4622341841  | -0.6602454428 | 0.9932943067  |
| C | 0.4798841475  | 0.6363445178  | 0.0030767763  |
| H | 1.0467438723  | 0.762774493   | -0.9138734557 |
| C | -0.5236550687 | 1.7186310538  | 0.3289713222  |
| C | -3.3302066913 | -0.8267926612 | -0.5491330492 |
| H | -2.1356073339 | -1.7445888343 | 1.7873674194  |
| C | -3.8154245693 | -1.8352888612 | -1.6198979944 |
| C | -3.5337806271 | 0.6039831505  | -1.0920048294 |
| C | -4.2216926092 | -0.9832879721 | 0.697460813   |
| H | -3.9172237192 | -0.3027360053 | 1.499641823   |
| H | -4.2023186376 | -2.0053666825 | 1.0882427252  |
| H | -5.2603646747 | -0.7510826647 | 0.4404185301  |
| H | -3.2769268129 | 1.3532643355  | -0.3393338914 |
| H | -4.5838987836 | 0.7500594722  | -1.3684016705 |

|   |               |               |               |
|---|---------------|---------------|---------------|
| H | -2.9331182645 | 0.8009300729  | -1.9840401343 |
| H | -3.2448293484 | -1.7252455784 | -2.5472580345 |
| H | -4.8761637072 | -1.678741364  | -1.8494339669 |
| H | -3.6889845847 | -2.865054964  | -1.2699575933 |
| H | -1.2933090267 | 1.2906184727  | 0.9847410204  |
| H | -1.0342575761 | 2.0447697152  | -0.5834081988 |
| C | 0.098233521   | 2.9474281844  | 1.0227790568  |
| H | -0.7043428812 | 3.6503240882  | 1.2876209271  |
| C | 1.1434825818  | 3.6759690388  | 0.1704445576  |
| H | 0.560107565   | 2.6347999191  | 1.9691061512  |
| H | 0.689481974   | 3.9648537328  | -0.7878753981 |
| H | 1.9569305429  | 2.98124524    | -0.0750594998 |
| C | 1.7188734554  | 4.9143171994  | 0.8628799028  |
| H | 2.4637334951  | 5.4176292727  | 0.2376096844  |
| H | 2.203809874   | 4.6456147151  | 1.808507669   |
| H | 0.9304847328  | 5.6403183734  | 1.0928795154  |
| C | 2.9731570947  | -1.0954011547 | -0.3857448491 |
| H | 2.5443490703  | -1.5102626851 | 1.6838108847  |
| H | 3.1488960025  | 0.1032345798  | 1.3912354979  |
| H | 2.286713358   | -1.8300597829 | -0.8280122216 |
| C | 4.3813730921  | -1.6988206186 | -0.3328287573 |
| H | 2.9796603305  | -0.2372201686 | -1.0699407805 |
| C | 4.9018954177  | -2.119771724  | -1.7098910193 |
| H | 4.3780963469  | -2.5660016634 | 0.3413418216  |
| H | 5.0696050515  | -0.9689233595 | 0.1147831501  |
| H | 5.9074124152  | -2.5480612634 | -1.6466021022 |
| H | 4.9458074345  | -1.2638485468 | -2.3930726799 |
| H | 4.2469887992  | -2.8713211804 | -2.1655623805 |
| H | 4.2469887992  | -2.8713211804 | -2.1655623805 |

TS endo 0445

E(RB3LYP) = -706.410205762 A.U.

First frequency = -507.5682 cm<sup>-1</sup>

|   |               |               |               |
|---|---------------|---------------|---------------|
| H | -1.9500451137 | -0.4773325022 | -2.2332284267 |
| C | -1.3686727976 | -0.918510128  | -1.428980055  |
| H | -0.6741210938 | -1.6792996759 | -1.7631902042 |
| C | -1.8710969903 | -0.938577042  | -0.1306968338 |

|   |               |               |               |
|---|---------------|---------------|---------------|
| C | -1.0258969459 | -1.4288861237 | 0.8911265842  |
| C | 0.2200313959  | -1.9763130159 | 0.6421443186  |
| H | 0.8600381064  | -2.2361792809 | 1.4798452751  |
| H | 0.4025973166  | -2.5497481174 | -0.2586396654 |
| C | 1.4162711646  | -0.390295797  | -0.525209871  |
| H | 1.7165140777  | -0.0197997216 | 0.4498522562  |
| C | 2.4061142394  | -1.271296743  | -1.2637679611 |
| C | 0.4855080771  | 0.365785738   | -1.2339611529 |
| H | 0.5453098425  | 0.3408187643  | -2.3209779581 |
| C | -0.0774048959 | 1.6240929258  | -0.6211046115 |
| C | -3.2706145062 | -0.3634061429 | 0.1819806561  |
| H | -1.279872168  | -1.2172633212 | 1.9246751157  |
| C | -4.3083712643 | -1.3678870733 | -0.3779710924 |
| C | -3.5111041862 | 1.0117827955  | -0.4770736778 |
| C | -3.5231717049 | -0.2034429101 | 1.6932996199  |
| H | -3.4613982004 | -1.1595903893 | 2.2220672556  |
| H | -4.5280500253 | 0.1984038868  | 1.859255037   |
| H | -2.8084718418 | 0.4891390358  | 2.1507239506  |
| H | -3.3382625522 | 0.9935331899  | -1.5564963111 |
| H | -2.8622503999 | 1.7766513283  | -0.0433819765 |
| H | -4.5496727925 | 1.3227731776  | -0.3187212711 |
| H | -4.1706994707 | -2.3582398588 | 0.0681548105  |
| H | -4.2051375981 | -1.4728054142 | -1.462426999  |
| H | -5.3299643192 | -1.0330999257 | -0.1619219146 |
| H | -0.4755993254 | 1.3716012245  | 0.369547052   |
| H | -0.9225169418 | 1.9861320646  | -1.2158472154 |
| C | 0.9579420802  | 2.7568170287  | -0.4885905535 |
| H | 1.7816730293  | 2.4211374434  | 0.155591922   |
| C | 0.3720156343  | 4.064296444   | 0.066919508   |
| H | 1.4024781845  | 2.9508213908  | -1.4737113947 |
| H | -0.427479182  | 4.413717885   | -0.6009999786 |
| H | 1.1493041487  | 4.8387943778  | 0.0423308666  |
| C | -0.1734423994 | 3.9470494215  | 1.4952021611  |
| H | 0.5959868568  | 3.5687213782  | 2.1786258177  |
| H | -1.0271199385 | 3.2637333514  | 1.5500117085  |
| H | -0.5068560158 | 4.9190237226  | 1.8731541068  |
| C | 3.3862361688  | -2.0664319497 | -0.3882266806 |
| H | 2.9946408439  | -0.6416073273 | -1.9484626474 |

|   |              |               |               |
|---|--------------|---------------|---------------|
| H | 1.8537120904 | -1.9648239752 | -1.9154094524 |
| H | 2.8351771634 | -2.7304379825 | 0.2884787931  |
| C | 4.3448097249 | -1.1926202639 | 0.431438476   |
| H | 3.9805185427 | -2.7227373593 | -1.038049852  |
| C | 5.343122496  | -2.0183030713 | 1.2480965893  |
| H | 3.7741763836 | -0.5439749178 | 1.1076774532  |
| H | 4.8872847077 | -0.5202804129 | -0.247323329  |
| H | 4.8240921562 | -2.6763472791 | 1.9545692841  |
| H | 6.019842213  | -1.37865952   | 1.8239105751  |
| H | 5.9556714247 | -2.6528850309 | 0.5973458135  |
| H | 5.9556714247 | -2.6528850309 | 0.5973458135  |

TS endo 0446

E(RB3LYP) = -706.412356260 A.U.

First frequency = -524.2959  $\text{cm}^{-1}$

|   |               |               |               |
|---|---------------|---------------|---------------|
| H | -1.3369952673 | -0.1535069891 | -2.1215308912 |
| C | -1.165937631  | -0.8483476092 | -1.3074746617 |
| H | -0.464918349  | -1.6369717331 | -1.5521286142 |
| C | -2.1361978463 | -1.0560840462 | -0.3299010514 |
| C | -1.7923690751 | -1.8827460976 | 0.7623552736  |
| C | -0.5681228711 | -2.5254568128 | 0.85844143    |
| H | -0.3121659086 | -3.0527171294 | 1.7736079179  |
| H | -0.0928060421 | -2.9241239188 | -0.0299573153 |
| C | 1.0325557246  | -0.9552044468 | 0.675659631   |
| H | 0.9465181083  | -0.7893617873 | 1.747616943   |
| C | 2.1819556484  | -1.8513639598 | 0.2616263915  |
| C | 0.5259960143  | 0.0518925047  | -0.152068989  |
| H | 1.002372584   | 0.2064450125  | -1.1163211157 |
| C | -0.1530791471 | 1.2457395901  | 0.4797283384  |
| C | -3.4945633434 | -0.3220451308 | -0.3273212726 |
| H | -2.4298516174 | -1.8680049842 | 1.6431491429  |
| C | -3.6386491571 | 0.6490871542  | -1.5130075698 |
| C | -3.7332585317 | 0.4820904146  | 0.9711655052  |
| C | -4.5963635896 | -1.4030579198 | -0.4498653002 |
| H | -4.4682640387 | -1.9861518081 | -1.3675816753 |
| H | -5.5900678672 | -0.9404697307 | -0.4723483441 |
| H | -4.5656006435 | -2.0989354955 | 0.3941195303  |

|   |               |               |               |
|---|---------------|---------------|---------------|
| H | -3.6552523388 | -0.1416385322 | 1.8656488261  |
| H | -4.7388627548 | 0.9175218655  | 0.9625735032  |
| H | -3.0151266073 | 1.3006760997  | 1.0669825263  |
| H | -2.8847512844 | 1.4426748745  | -1.4790037264 |
| H | -4.6233639626 | 1.1269133759  | -1.4833990005 |
| H | -3.5492788463 | 0.1327158057  | -2.4738670106 |
| H | -0.8918495151 | 0.8676584346  | 1.1957078122  |
| H | -0.7165378629 | 1.8026048439  | -0.2768000308 |
| C | 0.7923786638  | 2.2050222013  | 1.2333108839  |
| H | 0.1849434756  | 3.0134688195  | 1.6643319826  |
| C | 1.9181400403  | 2.8201936976  | 0.3887322495  |
| H | 1.2400169513  | 1.6687721287  | 2.0797405064  |
| H | 2.6131413968  | 2.0298974153  | 0.0835114634  |
| H | 2.497401485   | 3.5028414956  | 1.0235463273  |
| C | 1.4305928996  | 3.5750004706  | -0.8521818778 |
| H | 0.7058818431  | 4.3525139146  | -0.5831629272 |
| H | 0.9423007441  | 2.9033706691  | -1.5662882847 |
| H | 2.2625269632  | 4.0596305208  | -1.3733920065 |
| C | 3.5744452986  | -1.1871177044 | 0.3794906925  |
| H | 2.0354714344  | -2.1886322473 | -0.7749019782 |
| H | 2.1712843131  | -2.7566721161 | 0.8795955031  |
| H | 3.6011913418  | -0.5677155234 | 1.2865455425  |
| C | 3.9739190739  | -0.3400342583 | -0.834373819  |
| H | 4.3347905441  | -1.9669908307 | 0.522475432   |
| C | 5.2911329736  | 0.4120743663  | -0.6284672865 |
| H | 3.1790181699  | 0.378209032   | -1.0613541222 |
| H | 4.0509388132  | -0.9941232811 | -1.7136400821 |
| H | 6.1111268782  | -0.2788227551 | -0.4010378832 |
| H | 5.2115369343  | 1.1162989204  | 0.2077673931  |
| H | 5.5723606115  | 0.9832027869  | -1.5192504989 |
| H | 5.5723606115  | 0.9832027869  | -1.5192504989 |

TS endo 0452

E(RB3LYP) = -706.410346076 A.U.

First frequency = -514.1731  $\text{cm}^{-1}$

|   |               |               |               |
|---|---------------|---------------|---------------|
| H | -0.8335972389 | -0.2110246701 | -2.1189320856 |
| C | -0.6335098818 | -0.7492203074 | -1.1972342536 |



|   |               |               |               |
|---|---------------|---------------|---------------|
| H | 0.1978494306  | -1.4360908616 | -1.2644685642 |
| C | -1.6456290337 | -0.9459365938 | -0.2632633456 |
| C | -1.2969236867 | -1.544022056  | 0.9689008774  |
| C | -0.0160315706 | -1.9928576183 | 1.2478693871  |
| H | 0.2191221304  | -2.3413772539 | 2.2498132881  |
| H | 0.5885687725  | -2.4412016599 | 0.4685491524  |
| C | 1.3694389     | -0.2495650118 | 1.0151142186  |
| H | 1.0784237571  | 0.0598332582  | 2.0166520912  |
| C | 2.6975184187  | -0.9873610835 | 0.9617124593  |
| C | 0.8848287581  | 0.5377895778  | -0.0292220001 |
| H | 1.4606812591  | 0.5934552128  | -0.9488428181 |
| C | 0.0197455872  | 1.7341239204  | 0.2857005144  |
| C | -3.0799942125 | -0.442516969  | -0.5435485687 |
| H | -1.9957677621 | -1.4816667304 | 1.796502656   |
| C | -3.6803422049 | -1.3643801177 | -1.6338807294 |
| C | -3.1087798512 | 1.0128974729  | -1.058513924  |
| C | -3.9884737051 | -0.5146334132 | 0.69841236    |
| H | -4.0864043275 | -1.5380182896 | 1.073762486   |
| H | -4.9928100806 | -0.161725084  | 0.4422624215  |
| H | -3.6123416191 | 0.1153024332  | 1.5114482208  |
| H | -4.1312632568 | 1.2868554661  | -1.3412831396 |
| H | -2.4782344642 | 1.1550722666  | -1.9403408938 |
| H | -2.7751240765 | 1.7116608178  | -0.2873443549 |
| H | -3.6788620372 | -2.4083939827 | -1.3039047487 |
| H | -3.0994844375 | -1.3060934326 | -2.5595018587 |
| H | -4.7142389314 | -1.0774547051 | -1.8598748365 |
| H | -0.7681333915 | 1.4224533219  | 0.9860404433  |
| H | -0.4855429319 | 2.0744978633  | -0.6212965041 |
| C | 0.803932786   | 2.905082811   | 0.9075589983  |
| H | 1.3478995673  | 2.5403634593  | 1.7879332789  |
| C | -0.0806517807 | 4.0938747138  | 1.3152176186  |
| H | 1.5693945879  | 3.246251652   | 0.1960500419  |
| H | 0.5410260535  | 4.8355162681  | 1.8330992007  |
| H | -0.8232263058 | 3.7520488363  | 2.0496472185  |
| C | -0.7997405827 | 4.7742048214  | 0.1442026053  |
| H | -0.0836738325 | 5.0982407882  | -0.6203099451 |
| H | -1.3525704889 | 5.6580564761  | 0.478957378   |
| H | -1.5168257985 | 4.1026910244  | -0.3388710047 |

|   |              |               |               |
|---|--------------|---------------|---------------|
| C | 3.1294482787 | -1.5164859627 | -0.4117305208 |
| H | 2.681701018  | -1.8247437683 | 1.6720798005  |
| H | 3.480844837  | -0.3077633748 | 1.3323294009  |
| H | 2.352072804  | -2.1735487401 | -0.8244998557 |
| C | 4.4544474119 | -2.2858254211 | -0.3603194639 |
| H | 3.2290281714 | -0.6838156838 | -1.1197093451 |
| C | 4.8959676788 | -2.8054342983 | -1.7312934386 |
| H | 4.3570800006 | -3.1271193749 | 0.3391724939  |
| H | 5.2341478197 | -1.6335410131 | 0.0560296706  |
| H | 4.1466743694 | -3.483785603  | -2.1552833513 |
| H | 5.8428324249 | -3.3514250634 | -1.6691489263 |
| H | 5.0318973615 | -1.9807162059 | -2.4402638986 |
| H | 5.0318973615 | -1.9807162059 | -2.4402638986 |

TS endo 0462

E(RB3LYP) = -706.409279645 A.U.

First frequency = -525.3143 cm<sup>-1</sup>

|   |               |               |               |
|---|---------------|---------------|---------------|
| H | -1.8408646903 | 0.4220459225  | -1.9775749088 |
| C | -1.4450007054 | -0.4293134424 | -1.4359677321 |
| H | -0.7843803106 | -1.0495975561 | -2.0299437969 |
| C | -2.1468138782 | -0.9834105209 | -0.3671071691 |
| C | -1.5131171233 | -2.0125631074 | 0.363066626   |
| C | -0.2706086238 | -2.5200512017 | 0.0165176638  |
| H | 0.2216752582  | -3.2268069451 | 0.6793006568  |
| H | -0.0015976057 | -2.6305601014 | -1.0271451459 |
| C | 1.1575549914  | -0.7790766751 | -0.0867647791 |
| H | 1.3201704237  | -0.91577879   | 0.9774885044  |
| C | 2.1804298384  | -1.3876482048 | -1.0253468629 |
| C | 0.4181137684  | 0.3422348752  | -0.4764386099 |
| H | 0.651566842   | 0.7804994135  | -1.4431241301 |
| C | -0.1585633053 | 1.2535895062  | 0.5838658593  |
| C | -3.5026322848 | -0.4311763173 | 0.123583163   |
| H | -1.9246259166 | -2.289424098  | 1.3308264838  |
| C | -4.5423758407 | -1.5676665149 | -0.0342593814 |
| C | -3.9796630169 | 0.7750650066  | -0.7052713274 |
| C | -3.4645859203 | 0.0018003237  | 1.6071645519  |
| H | -3.1421149306 | -0.8081534471 | 2.2669334555  |

|   |               |               |               |
|---|---------------|---------------|---------------|
| H | -4.4640786125 | 0.3112673274  | 1.9330831473  |
| H | -2.7874448279 | 0.84709586    | 1.7551485596  |
| H | -4.9543668709 | 1.1142094396  | -0.3394247227 |
| H | -4.0925305654 | 0.5206647048  | -1.7637821282 |
| H | -3.2859488753 | 1.6188756999  | -0.6279059698 |
| H | -4.2732250476 | -2.4394093175 | 0.5699150295  |
| H | -4.6074378307 | -1.8925422735 | -1.0777389208 |
| H | -5.5356119019 | -1.2287249775 | 0.2828413017  |
| H | -0.6489570812 | 0.6053195578  | 1.3195585348  |
| H | -0.9481215373 | 1.8845896561  | 0.1572626747  |
| C | 0.8458014881  | 2.1528353884  | 1.3406563268  |
| H | 0.3685046396  | 2.4609769183  | 2.2805742831  |
| C | 1.2956043686  | 3.4286397078  | 0.6097672998  |
| H | 1.7233890863  | 1.5587987335  | 1.6238208072  |
| H | 1.8241496027  | 4.0665568179  | 1.3304421092  |
| H | 0.4045332911  | 3.995001362   | 0.3047304948  |
| C | 2.2037731402  | 3.2169560753  | -0.6064307461 |
| H | 1.6938595217  | 2.6802050169  | -1.4108040149 |
| H | 3.0930917916  | 2.6372504789  | -0.3365355148 |
| H | 2.5425728426  | 4.1757448854  | -1.013481559  |
| C | 3.5078948797  | -0.6105867674 | -1.189426877  |
| H | 1.7170193443  | -1.4644682275 | -2.0196221999 |
| H | 2.4126833388  | -2.416602256  | -0.7212724977 |
| H | 3.9714270797  | -0.9433793565 | -2.1276867953 |
| C | 4.5451264723  | -0.7974842901 | -0.0696632659 |
| H | 3.2875007329  | 0.4562546673  | -1.317718746  |
| C | 4.1970191337  | -0.1599320371 | 1.2797051551  |
| H | 5.4980577436  | -0.3763864021 | -0.4162902429 |
| H | 4.7256909821  | -1.8724434216 | 0.0703605113  |
| H | 5.0253970623  | -0.2680928467 | 1.988065257   |
| H | 3.3139296071  | -0.6165240982 | 1.7340734069  |
| H | 3.9926837975  | 0.910247493   | 1.1674131938  |
| H | 3.9926837975  | 0.910247493   | 1.1674131938  |

TS endo 0469

E(RB3LYP) = -706.408886820 A.U.

First frequency = -549.1642  $\text{cm}^{-1}$

|   |               |               |               |
|---|---------------|---------------|---------------|
| H | -1.7741515356 | -1.591943131  | -1.8688643693 |
| C | -1.3909870048 | -1.5942914503 | -0.8546553577 |
| H | -0.74728044   | -2.4396472376 | -0.6413930123 |
| C | -2.1112645431 | -0.9928256474 | 0.1779441825  |
| C | -1.5008310893 | -0.9397561351 | 1.4487651115  |
| C | -0.2627303725 | -1.5069317772 | 1.7054961595  |
| H | 0.2197494527  | -1.3283915734 | 2.6628715621  |
| H | 0.0088270091  | -2.4475731892 | 1.2416540844  |
| C | 1.1689475885  | -0.6665663512 | 0.1841233868  |
| H | 1.3590941054  | 0.1469600889  | 0.8732477146  |
| C | 2.1814599936  | -1.7958334977 | 0.1958440838  |
| C | 0.4643266756  | -0.3922971925 | -0.9949643974 |
| H | 0.7210773528  | -1.0156372605 | -1.8507452189 |
| C | -0.0230567213 | 1.0002044575  | -1.3833531411 |
| C | -3.4637495131 | -0.2821380798 | -0.0423736051 |
| H | -1.9217599884 | -0.2720883536 | 2.1972265884  |
| C | -3.4114948035 | 1.2112869799  | 0.3503546564  |
| C | -4.5097200193 | -0.9954451948 | 0.8489789821  |
| C | -3.9428481239 | -0.3691096012 | -1.5027379332 |
| H | -3.2537387102 | 0.1349163032  | -2.1887752452 |
| H | -4.9188833723 | 0.117132848   | -1.6021975913 |
| H | -4.0525985122 | -1.4072786059 | -1.8316759446 |
| H | -5.4994734515 | -0.5423857894 | 0.7185421683  |
| H | -4.244229587  | -0.9273951777 | 1.9081804898  |
| H | -4.5814213902 | -2.0569621929 | 0.5908601209  |
| H | -4.407593872  | 1.6597478421  | 0.2617821836  |
| H | -2.7341693271 | 1.7659315145  | -0.3028447146 |
| H | -3.0758137661 | 1.35648186    | 1.3806191433  |
| H | -1.0397585202 | 0.9300227186  | -1.7826618492 |
| H | 0.5954734918  | 1.3466972986  | -2.2257020692 |
| C | 0.0149952281  | 2.0762909692  | -0.282668213  |
| H | -0.7190036629 | 2.8567225422  | -0.5205879831 |
| C | 1.3835182642  | 2.7510180365  | -0.1143221046 |
| H | -0.3144072385 | 1.6424347958  | 0.6692411884  |
| H | 1.6264003574  | 3.2901596913  | -1.0400713512 |
| H | 2.163510685   | 1.9900624887  | -0.0010682652 |
| C | 1.4280433533  | 3.7150809076  | 1.07351109    |
| H | 2.4025190817  | 4.2068807891  | 1.1591231419  |

|   |              |               |               |
|---|--------------|---------------|---------------|
| H | 1.236632554  | 3.1864075873  | 2.0145983156  |
| H | 0.6661235731 | 4.4971967229  | 0.9762117155  |
| C | 3.518091265  | -1.4438216536 | -0.4877974536 |
| H | 1.7472441127 | -2.6670799416 | -0.315064866  |
| H | 2.3875690874 | -2.1144965997 | 1.2257823051  |
| H | 4.1225240919 | -2.3573238274 | -0.578996517  |
| C | 4.3372311216 | -0.3822435054 | 0.255105832   |
| H | 3.318205272  | -1.1003346242 | -1.5117235591 |
| C | 5.66228186   | -0.05999922   | -0.4409895954 |
| H | 4.5313214864 | -0.7303206426 | 1.2791442003  |
| H | 3.7460010744 | 0.5361112482  | 0.353466875   |
| H | 6.2331149769 | 0.6955669511  | 0.1086456588  |
| H | 5.4903435651 | 0.3228754775  | -1.4534902006 |
| H | 6.289951822  | -0.9542571879 | -0.5294593921 |
| H | 6.289951822  | -0.9542571879 | -0.5294593921 |

TS endo 0474

E(RB3LYP) = -706.410444793 A.U.

First frequency = -498.8421  $\text{cm}^{-1}$

|   |               |               |               |
|---|---------------|---------------|---------------|
| H | -1.9592086554 | -0.6789955106 | -2.1668876932 |
| C | -1.4079906626 | -1.1146071958 | -1.3388135621 |
| H | -0.7124583973 | -1.8882519026 | -1.6385709207 |
| C | -1.9427803108 | -1.0997765104 | -0.0546379874 |
| C | -1.1332648976 | -1.5850278901 | 0.9990497749  |
| C | 0.109053437   | -2.1562512219 | 0.793103223   |
| H | 0.7244315059  | -2.4145341135 | 1.6494532935  |
| H | 0.3070958512  | -2.741122608  | -0.0970085178 |
| C | 1.3630336327  | -0.5964647827 | -0.3454918216 |
| H | 1.6147412647  | -0.191153669  | 0.629476113   |
| C | 2.396432127   | -1.4917087167 | -1.0011250357 |
| C | 0.4770963658  | 0.1436198529  | -1.1235821183 |
| H | 0.5761185333  | 0.0683167716  | -2.2053954774 |
| C | -0.0787193644 | 1.4413659342  | -0.5909869081 |
| C | -3.3404251664 | -0.4958456663 | 0.2079100158  |
| H | -1.4114298389 | -1.3503868595 | 2.0213492085  |
| C | -3.6384947319 | -0.3186866175 | 1.7089137713  |
| C | -4.3797646809 | -1.4843568475 | -0.3768586869 |

|   |               |               |               |
|---|---------------|---------------|---------------|
| C | -3.5303267894 | 0.8778379673  | -0.4705471727 |
| H | -3.3285187565 | 0.8433629464  | -1.5445933896 |
| H | -2.875013316  | 1.6313700008  | -0.027034825  |
| H | -4.5652280935 | 1.2148491343  | -0.3442366715 |
| H | -4.2770977442 | -2.4731236572 | 0.0820760001  |
| H | -4.2442140606 | -1.6016184455 | -1.4564561002 |
| H | -5.4006510075 | -1.1268859422 | -0.1969061341 |
| H | -4.6415298625 | 0.1005629991  | 1.8391101224  |
| H | -2.9279485874 | 0.3661863299  | 2.183740012   |
| H | -3.6092219625 | -1.2714535679 | 2.2466319312  |
| H | -0.4997737451 | 1.258382837   | 0.4075507426  |
| H | -0.9061493566 | 1.784539491   | -1.2202953135 |
| C | 0.9737556734  | 2.5605170506  | -0.494020933  |
| H | 1.8002796931  | 2.2281908468  | 0.1484579038  |
| C | 0.3992180583  | 3.8739977839  | 0.0481110016  |
| H | 1.4137676584  | 2.7352100246  | -1.4859796505 |
| H | -0.0451599816 | 3.691094129   | 1.0362406408  |
| H | -0.4259774633 | 4.2022271063  | -0.5986684117 |
| C | 1.445336437   | 4.9873767017  | 0.1523810783  |
| H | 1.8820332733  | 5.2100920744  | -0.8279345954 |
| H | 2.265179106   | 4.6956229486  | 0.818791687   |
| H | 1.0116030735  | 5.9139120335  | 0.5427338359  |
| C | 3.2638580692  | -2.3446460731 | -0.0582674633 |
| H | 3.0623433358  | -0.8600823102 | -1.6062821064 |
| H | 1.8975022693  | -2.1527463376 | -1.7249055893 |
| H | 2.6581391875  | -3.1387023405 | 0.3921745404  |
| C | 3.9687904267  | -1.5630745205 | 1.0633961275  |
| H | 4.0247956219  | -2.8512348636 | -0.6669327725 |
| C | 4.825294765   | -0.3930261125 | 0.5673710813  |
| H | 4.598658243   | -2.2619986591 | 1.6280488591  |
| H | 3.2242927896  | -1.1906985634 | 1.7784986416  |
| H | 4.2113422156  | 0.382034631   | 0.0969061375  |
| H | 5.5609895585  | -0.7282071963 | -0.173151304  |
| H | 5.3717913807  | 0.0750190937  | 1.3924511761  |
| H | 5.3717913807  | 0.0750190937  | 1.3924511761  |

TS endo 0480

E(RB3LYP) = -706.409805104 A.U.

First frequency =  $-529.9974 \text{ cm}^{-1}$

|   |               |               |               |
|---|---------------|---------------|---------------|
| H | -1.9700866727 | -0.4157568282 | -2.251342973  |
| C | -1.4245516728 | -0.9041862747 | -1.4516172388 |
| H | -0.7111957033 | -1.6397932526 | -1.8072533963 |
| C | -2.0025106283 | -1.0558828099 | -0.1901788713 |
| C | -1.197270489  | -1.6103377922 | 0.8273990722  |
| C | 0.0918704112  | -2.0623851063 | 0.610714637   |
| H | 0.6937036027  | -2.3684979102 | 1.4610327255  |
| H | 0.3651853703  | -2.5336584403 | -0.3253369501 |
| C | 1.2244912362  | -0.2995356118 | -0.3832956139 |
| H | 1.445122147   | 0.0188008629  | 0.6279950399  |
| C | 2.3019207874  | -1.0657014934 | -1.1307079669 |
| C | 0.2704965046  | 0.4257514318  | -1.1053698302 |
| H | 0.4129211991  | 0.4662534037  | -2.1861811704 |
| C | -0.3814581878 | 1.6539027224  | -0.5078985877 |
| C | -3.4030451743 | -0.516012562  | 0.1680023649  |
| H | -1.5338686295 | -1.5195368595 | 1.8577250994  |
| C | -4.2629298776 | -1.7224422525 | 0.6182956699  |
| C | -4.1032464509 | 0.1464359142  | -1.0322783094 |
| C | -3.3542089743 | 0.5153310196  | 1.3190397184  |
| H | -2.8872263571 | 0.1062576802  | 2.2190915645  |
| H | -4.3697449708 | 0.8267904046  | 1.5889195421  |
| H | -2.7949968126 | 1.4075884725  | 1.0266370302  |
| H | -3.5557920345 | 1.0245671664  | -1.3903401565 |
| H | -5.1041454729 | 0.4802516135  | -0.7395512591 |
| H | -4.2163283082 | -0.5497710288 | -1.8693352488 |
| H | -4.3323126548 | -2.4693383946 | -0.1791748835 |
| H | -5.2782757469 | -1.3976244549 | 0.8742049973  |
| H | -3.8337452283 | -2.2125946854 | 1.4972818227  |
| H | -0.5316007597 | 1.4896681936  | 0.5649366433  |
| H | -1.3794628817 | 1.7954221957  | -0.9363133976 |
| C | 0.4154128525  | 2.9560350942  | -0.7435052891 |
| H | 0.5269193051  | 3.1012691941  | -1.8266771875 |
| C | 1.8019063659  | 3.0283677102  | -0.0874084018 |
| H | -0.1908872751 | 3.7994925731  | -0.3841159118 |
| H | 2.2932413669  | 3.9539061923  | -0.4136636592 |
| H | 2.4229122051  | 2.2058085944  | -0.4619249665 |

|   |              |               |               |
|---|--------------|---------------|---------------|
| C | 1.7677930409 | 2.996656391   | 1.444130728   |
| H | 1.3544764625 | 2.0568649595  | 1.8234705817  |
| H | 1.1486752227 | 3.8107593475  | 1.8387252871  |
| H | 2.7721522945 | 3.1049875716  | 1.8660970894  |
| C | 3.3082505695 | -1.8752939472 | -0.2901964609 |
| H | 2.8690923165 | -0.3627120439 | -1.76052841   |
| H | 1.806822073  | -1.7417126476 | -1.8444211011 |
| H | 2.7851154212 | -2.3918795484 | 0.5227158458  |
| C | 4.4866434122 | -1.076834911  | 0.29377175    |
| H | 3.7271065381 | -2.6635616741 | -0.9281334995 |
| C | 4.1167382502 | -0.0329339027 | 1.3529635007  |
| H | 5.0247448543 | -0.5840678289 | -0.5278860324 |
| H | 5.195625949  | -1.79047647   | 0.733347194   |
| H | 5.014247193  | 0.4059112209  | 1.8015637279  |
| H | 3.5260322916 | -0.4813598851 | 2.1604118391  |
| H | 3.5301593934 | 0.7851430878  | 0.9291655741  |
| H | 3.5301593934 | 0.7851430878  | 0.9291655741  |

TS endo 0483

E(RB3LYP) = -706.411647382 A.U.

First frequency = -529.6056  $\text{cm}^{-1}$

|   |               |               |               |
|---|---------------|---------------|---------------|
| H | -1.1940649174 | 0.1043695029  | -1.9637839675 |
| C | -1.0111216725 | -0.657147791  | -1.215347561  |
| H | -0.2966173661 | -1.4077393172 | -1.5261903852 |
| C | -1.9617773996 | -0.9496440557 | -0.2429878481 |
| C | -1.607327328  | -1.8760315465 | 0.7620823349  |
| C | -0.3913151004 | -2.548005324  | 0.7572022256  |
| H | -0.1326160664 | -3.1815923384 | 1.6018450676  |
| H | 0.0221900528  | -2.887197187  | -0.186301053  |
| C | 1.2252820859  | -1.0910326482 | 0.7476431456  |
| H | 1.1834778863  | -1.049075562  | 1.8354069581  |
| C | 2.3534553546  | -1.9401179717 | 0.1930579301  |
| C | 0.7837254356  | 0.0550896345  | 0.0748619404  |
| H | 1.2457551112  | 0.3059149414  | -0.8743560701 |
| C | 0.168235757   | 1.1769949175  | 0.8787848397  |
| C | -3.3256432755 | -0.2297224012 | -0.151192036  |
| H | -2.2233239913 | -1.9354228485 | 1.6562100072  |



|   |               |               |               |
|---|---------------|---------------|---------------|
| C | -3.4929466486 | 0.5401534463  | 1.1781512362  |
| C | -4.425861062  | -1.3159994495 | -0.2382841109 |
| C | -3.5492299878 | 0.7619114621  | -1.3073789274 |
| H | -3.4816051096 | 0.266902673   | -2.2812273209 |
| H | -2.825179473  | 1.5814547536  | -1.287177482  |
| H | -4.5477432033 | 1.2042825746  | -1.2270498884 |
| H | -5.4209446933 | -0.8575299661 | -0.2020768066 |
| H | -4.3532437206 | -2.0293934994 | 0.5878607163  |
| H | -4.341895581  | -1.8793515692 | -1.1732535313 |
| H | -2.7801422516 | 1.3660307529  | 1.2487237748  |
| H | -3.3485146852 | -0.105370514  | 2.0488080404  |
| H | -4.5017221675 | 0.9633312151  | 1.2445988882  |
| H | 0.8788655588  | 1.4886626782  | 1.660518422   |
| H | -0.6827146613 | 0.7486040302  | 1.42499125    |
| C | -0.2765071028 | 2.4246049654  | 0.0953705859  |
| H | -0.688007459  | 2.1163360957  | -0.8724936431 |
| C | 0.8139923325  | 3.4847299124  | -0.1343151596 |
| H | -1.1008748091 | 2.9058625972  | 0.6363027085  |
| H | 1.1995758907  | 3.8169877604  | 0.8394314555  |
| H | 0.3470884386  | 4.3665956526  | -0.591952108  |
| C | 1.9842951616  | 3.0293832011  | -1.0117490741 |
| H | 2.6797542434  | 3.8537756174  | -1.2014791707 |
| H | 1.6305888962  | 2.6615537472  | -1.9821918917 |
| H | 2.5514691915  | 2.2233491667  | -0.5404525277 |
| C | 3.7473440763  | -1.5217264238 | 0.7098814498  |
| H | 2.3309710765  | -1.9026283207 | -0.9040380188 |
| H | 2.209649754   | -2.9940443154 | 0.4619749552  |
| H | 3.7493901502  | -1.6169759089 | 1.8041439433  |
| C | 4.2035376704  | -0.1049424113 | 0.3339879083  |
| H | 4.4864344908  | -2.245497845  | 0.338813072   |
| C | 4.3957585276  | 0.1093207842  | -1.1708345403 |
| H | 5.1503426512  | 0.1040281786  | 0.8479778334  |
| H | 3.4791038801  | 0.6210730061  | 0.7223587105  |
| H | 5.1134735134  | -0.6108718517 | -1.5806695707 |
| H | 4.7715601249  | 1.1152074281  | -1.3835606285 |
| H | 3.4578350058  | -0.0103800152 | -1.722035724  |
| H | 3.4578350058  | -0.0103800152 | -1.722035724  |

TS endo 0484

E(RB3LYP) = -706.410600121 A.U.

First frequency = -538.3799 cm<sup>-1</sup>

|   |               |               |               |
|---|---------------|---------------|---------------|
| H | -1.5003676751 | 0.5608395509  | -1.940530035  |
| C | -1.0363109885 | -0.2158335326 | -1.3439347795 |
| H | -0.2852417071 | -0.7821376011 | -1.8802381344 |
| C | -1.7038564553 | -0.7804361328 | -0.2620157286 |
| C | -0.9927772609 | -1.7051937889 | 0.5353548578  |
| C | 0.2811073437  | -2.1522241309 | 0.2153763837  |
| H | 0.803089751   | -2.7957778689 | 0.9177329001  |
| H | 0.5422253431  | -2.3248053505 | -0.8226429165 |
| C | 1.6201148613  | -0.3823702322 | -0.0018225082 |
| H | 1.8650194128  | -0.4916251991 | 1.0509142385  |
| C | 2.6467444507  | -0.8980973083 | -0.9954309913 |
| C | 0.8167362054  | 0.7071521426  | -0.3422942685 |
| H | 0.9889863314  | 1.1826166541  | -1.3048922832 |
| C | 0.2282016501  | 1.5530768709  | 0.7600629792  |
| C | -3.1259432804 | -0.3572597088 | 0.1692510867  |
| H | -1.3892113252 | -1.9533782254 | 1.5174112195  |
| C | -3.782135899  | 0.6106887649  | -0.8326040109 |
| C | -3.1390984586 | 0.3095827604  | 1.5632353112  |
| C | -3.9958162509 | -1.6375765316 | 0.2216428335  |
| H | -3.6182077119 | -2.3535316392 | 0.957233246   |
| H | -4.0104517072 | -2.1372829392 | -0.7523318533 |
| H | -5.0276487709 | -1.387854222  | 0.4946463023  |
| H | -2.67550794   | -0.3245678309 | 2.3242418303  |
| H | -4.1702699758 | 0.5056329799  | 1.878870449   |
| H | -2.6075260302 | 1.2645083759  | 1.5494595629  |
| H | -3.8243322032 | 0.1798985901  | -1.8379383244 |
| H | -3.2504999194 | 1.5649667549  | -0.8915225935 |
| H | -4.8081200647 | 0.8290125633  | -0.5181459308 |
| H | 1.0419359048  | 1.89893802    | 1.4163815164  |
| H | -0.3928715425 | 0.9002284969  | 1.3880734418  |
| C | -0.5761400763 | 2.7725565941  | 0.2975424432  |
| H | -1.3578355022 | 2.4475974016  | -0.3984176167 |
| C | 0.2689693798  | 3.8652683556  | -0.3702675785 |
| H | -1.0957028008 | 3.2099990881  | 1.1607722886  |

|   |               |               |               |
|---|---------------|---------------|---------------|
| H | 0.7975862727  | 3.4492506248  | -1.2373888969 |
| H | 1.0487863401  | 4.1949884312  | 0.329749      |
| C | -0.5676227493 | 5.0676197905  | -0.8167312142 |
| H | 0.0512935336  | 5.8386132093  | -1.287108127  |
| H | -1.0836304784 | 5.5264450965  | 0.0345621709  |
| H | -1.3333608868 | 4.7661074359  | -1.5408487771 |
| C | 3.480961475   | -2.1087410133 | -0.548501297  |
| H | 3.3404461734  | -0.0786560643 | -1.2375448576 |
| H | 2.1402510623  | -1.1357398601 | -1.9427727654 |
| H | 2.8281890794  | -2.9653729517 | -0.3423812774 |
| C | 4.3674166344  | -1.8449429058 | 0.6756466998  |
| H | 4.1229903842  | -2.4142029644 | -1.3856208142 |
| C | 5.2356080171  | -3.0512301902 | 1.0453233905  |
| H | 3.7444893413  | -1.5720137617 | 1.5365061509  |
| H | 5.0076347109  | -0.9747248742 | 0.4758578445  |
| H | 4.6160093947  | -3.9253803842 | 1.2765581105  |
| H | 5.860913967   | -2.8451045762 | 1.9200451491  |
| H | 5.8988744547  | -3.3282804505 | 0.2178718088  |
| H | 5.8988744547  | -3.3282804505 | 0.2178718088  |

TS endo 0491

E(RB3LYP) = -706.409005083 A.U.

First frequency = -540.9873  $\text{cm}^{-1}$

|   |               |               |               |
|---|---------------|---------------|---------------|
| H | -1.2009553623 | -1.4174443624 | -2.0705669414 |
| C | -1.0194576862 | -1.5246954388 | -1.0071807966 |
| H | -0.359060604  | -2.3479861082 | -0.7632528572 |
| C | -1.9614156911 | -1.0912320277 | -0.0754680694 |
| C | -1.6048967853 | -1.1607550054 | 1.2880214729  |
| C | -0.3872709058 | -1.66694939   | 1.7131123151  |
| H | -0.1089651447 | -1.5831696681 | 2.7603959452  |
| H | 0.0579569192  | -2.5138489777 | 1.2040042911  |
| C | 1.1955621547  | -0.5091636372 | 0.6402844493  |
| H | 1.1199549507  | 0.2585007695  | 1.4027702035  |
| C | 2.3517260874  | -1.4700783217 | 0.83577217    |
| C | 0.7375972398  | -0.2004537436 | -0.6478686295 |
| H | 1.225086335   | -0.7351418349 | -1.4603139332 |
| C | 0.2244436181  | 1.1808886073  | -1.0508503926 |

|   |               |               |               |
|---|---------------|---------------|---------------|
| C | -3.2911784394 | -0.4157087674 | -0.4726452546 |
| H | -2.2127544667 | -0.6209452178 | 2.010504473   |
| C | -4.4399978493 | -1.2646232727 | 0.1242627996  |
| C | -3.4872764995 | -0.3549592391 | -1.9982946792 |
| C | -3.3977387972 | 1.0243374826  | 0.0784490655  |
| H | -4.379235026  | 1.4490100479  | -0.1615000729 |
| H | -2.6348200861 | 1.6720568985  | -0.359790548  |
| H | -3.2809891068 | 1.0593952147  | 1.1649750104  |
| H | -4.4583559263 | 0.0949742252  | -2.2296304877 |
| H | -3.4658634203 | -1.352437395  | -2.4484943192 |
| H | -2.7191675879 | 0.2550691049  | -2.4853802094 |
| H | -4.4026202436 | -2.2908970113 | -0.2551463119 |
| H | -5.4132451834 | -0.8354398742 | -0.1410923473 |
| H | -4.3782634312 | -1.3104877031 | 1.215599547   |
| H | -0.725044418  | 1.082477058   | -1.585322054  |
| H | 0.9296480008  | 1.5923560237  | -1.7891542148 |
| C | 0.0587376207  | 2.213456221   | 0.0777534397  |
| H | -0.6287801144 | 2.999415037   | -0.2615152442 |
| C | 1.3693806458  | 2.8840379933  | 0.5138879551  |
| H | -0.4329681315 | 1.7455254632  | 0.939876605   |
| H | 1.7826897057  | 3.436102727   | -0.3412239181 |
| H | 2.1156457086  | 2.1218558636  | 0.7657366243  |
| C | 1.1827431378  | 3.8328290502  | 1.7006342693  |
| H | 2.122145508   | 4.3212936714  | 1.9793996023  |
| H | 0.8134762341  | 3.2926199845  | 2.5801915029  |
| H | 0.4538111309  | 4.6179317492  | 1.4683671075  |
| C | 3.7319705764  | -0.776529657  | 0.7728650361  |
| H | 2.2992893261  | -2.2685421503 | 0.0836561194  |
| H | 2.2768635242  | -1.9665502356 | 1.8108786053  |
| H | 3.758590202   | 0.0020605262  | 1.5473652452  |
| C | 4.1090258279  | -0.1485336968 | -0.5773408983 |
| H | 4.5020309195  | -1.5099337285 | 1.0507352729  |
| C | 4.2771710199  | -1.1646100708 | -1.7120218341 |
| H | 5.0490948443  | 0.4035144277  | -0.4512279106 |
| H | 3.3541669211  | 0.595507567   | -0.8576880604 |
| H | 3.3430212282  | -1.6928235544 | -1.9284066904 |
| H | 5.0287919571  | -1.9202743228 | -1.4550424919 |
| H | 4.5983164289  | -0.6754546858 | -2.6374093705 |

H 4.5983164289 -0.6754546858 -2.6374093705

TS endo 0492

E(RB3LYP) = -706.409130208 A.U.

First frequency = -510.7738 cm<sup>-1</sup>

H -1.6545584333 -0.438943108 -2.2673459412  
C -1.1693031143 -0.844772538 -1.3842554047  
H -0.2813469266 -1.4240797492 -1.6057453998  
C -1.9119305517 -1.1019880322 -0.2340003506  
C -1.2104316066 -1.5296920252 0.9155307705  
C 0.1470823368 -1.794585643 0.9160695731  
H 0.6417357338 -2.0136940849 1.8572056296  
H 0.6290875558 -2.2205113218 0.0441860961  
C 1.1878886419 0.1099618583 0.1465521126  
H 1.1839102292 0.4375227823 1.1818012716  
C 2.4838880078 -0.4862538444 -0.3689384024  
C 0.3063803383 0.7363641688 -0.7334135844  
H 0.6141699217 0.7966555471 -1.7771617226  
C -0.6010910343 1.8486996972 -0.2635956302  
C -3.4364133297 -0.8525643167 -0.2077107675  
H -1.7100615058 -1.4854946456 1.8778326032  
C -4.0923867961 -1.9497716713 -1.082587476  
C -3.8223448933 0.5286534895 -0.7779828572  
C -4.0296211217 -0.9528644499 1.2105051686  
H -3.8674850374 -1.9410491012 1.6520144442  
H -5.1107686573 -0.7843478912 1.1710400309  
H -3.6006975685 -0.2016732696 1.8820932139  
H -3.4345328446 0.684421273 -1.7884929831  
H -3.4486054373 1.335427259 -0.1423965762  
H -4.9131084494 0.6186367198 -0.8304500835  
H -5.1840751859 -1.8467708508 -1.0814878089  
H -3.8420028265 -2.9474356917 -0.7074626944  
H -3.7446040438 -1.8854063644 -2.1182058025  
H -1.0296033091 1.5708218658 0.7090547912  
H -1.4410231953 1.9528587752 -0.9550939889  
C 0.0876360513 3.2266863679 -0.1498375718  
H 0.5106638457 3.4975644172 -1.1278449248

|   |               |               |               |
|---|---------------|---------------|---------------|
| C | 1.1816799194  | 3.3409866281  | 0.9172919324  |
| H | -0.6884824394 | 3.9763609265  | 0.0601877899  |
| H | 2.0002239285  | 2.6519490112  | 0.6808520799  |
| H | 0.7777746443  | 3.0135639463  | 1.8855471803  |
| C | 1.7329035109  | 4.7644968733  | 1.0436942792  |
| H | 2.1624818352  | 5.1052203837  | 0.0944492666  |
| H | 2.5174742276  | 4.8263039262  | 1.8050426458  |
| H | 0.9431368035  | 5.4727749025  | 1.319582499   |
| C | 3.3791154328  | -1.1087344533 | 0.7100212277  |
| H | 3.0599794983  | 0.3026503968  | -0.8769773435 |
| H | 2.2587653204  | -1.2257367505 | -1.1511707147 |
| H | 3.5213299753  | -0.370059729  | 1.5104597676  |
| C | 4.7537241897  | -1.5617893951 | 0.19575692    |
| H | 2.8709208021  | -1.9642613785 | 1.1706214152  |
| C | 4.6909580459  | -2.7066195486 | -0.8222005982 |
| H | 5.3635366082  | -1.8776156976 | 1.0516409499  |
| H | 5.2751339809  | -0.7034029713 | -0.2498532664 |
| H | 4.1568811845  | -3.569800432  | -0.4076844173 |
| H | 5.6943416149  | -3.040193738  | -1.1060368623 |
| H | 4.1734367204  | -2.4076972104 | -1.7393715056 |
| H | 4.1734367204  | -2.4076972104 | -1.7393715056 |

TS endo 0499

E(RB3LYP) = -706.410455840 A.U.

First frequency = -516.1538  $\text{cm}^{-1}$

|   |               |               |               |
|---|---------------|---------------|---------------|
| H | -1.234913645  | -0.7115761015 | -2.1826570952 |
| C | -0.9410715132 | -1.0358695147 | -1.1892773906 |
| H | -0.2727123985 | -1.8873516215 | -1.1923657037 |
| C | -1.7751907806 | -0.8060630916 | -0.0972299869 |
| C | -1.2919020754 | -1.165482321  | 1.1817108107  |
| C | -0.067881392  | -1.7810620015 | 1.371111415   |
| H | 0.3126829551  | -1.9183796224 | 2.3794439356  |
| H | 0.3022586972  | -2.5022301811 | 0.6525407727  |
| C | 1.4961078309  | -0.4435707987 | 0.398926261   |
| H | 1.5252560653  | 0.1507799473  | 1.3067415416  |
| C | 2.5889192733  | -1.4840638323 | 0.2697513821  |
| C | 0.9487310975  | 0.1328166144  | -0.7481756813 |

|   |               |               |               |
|---|---------------|---------------|---------------|
| H | 1.3237105156  | -0.2505459967 | -1.6969290918 |
| C | 0.5026443495  | 1.5832917096  | -0.8164191612 |
| C | -3.1470603241 | -0.1204544236 | -0.2806138006 |
| H | -1.7937390603 | -0.7685531347 | 2.0582637941  |
| C | -4.1123410192 | -1.1917194323 | -0.8470703835 |
| C | -3.0922519237 | 1.0619880933  | -1.2703918293 |
| C | -3.7355020117 | 0.4050923615  | 1.0434346304  |
| H | -4.7032216793 | 0.8808844537  | 0.8539406083  |
| H | -3.0836461941 | 1.1515573027  | 1.5097370028  |
| H | -3.9046168447 | -0.399990882  | 1.7647792014  |
| H | -2.4624622829 | 1.8682552125  | -0.8892009151 |
| H | -4.0990836174 | 1.4661642677  | -1.421997601  |
| H | -2.7119993185 | 0.76817638    | -2.2522035628 |
| H | -5.1184858772 | -0.777068852  | -0.9820729615 |
| H | -4.1827968153 | -2.0489275838 | -0.1696679506 |
| H | -3.759869178  | -1.5590148171 | -1.8159955458 |
| H | -0.2530764066 | 1.6999656075  | -1.6011507361 |
| H | 1.3665147918  | 2.1817251263  | -1.1493628991 |
| C | -0.0298571999 | 2.1865897232  | 0.4875838221  |
| H | -0.8547209925 | 1.5709300865  | 0.8613590868  |
| C | -0.4951367412 | 3.638137703   | 0.3286834865  |
| H | 0.748190591   | 2.1518657009  | 1.2608745544  |
| H | -1.2429885621 | 3.7000944248  | -0.4734390552 |
| H | 0.3509196331  | 4.2557441268  | -0.0025075405 |
| C | -1.0843482183 | 4.2139399553  | 1.6192445097  |
| H | -1.9572066056 | 3.6346965805  | 1.9426170657  |
| H | -1.4029612116 | 5.2534482292  | 1.4904413265  |
| H | -0.3517841767 | 4.1868789945  | 2.4340277875  |
| C | 3.9657271524  | -0.8513057899 | -0.0085391195 |
| H | 2.3329380094  | -2.1760559336 | -0.543903912  |
| H | 2.6588628953  | -2.0914127079 | 1.1816979072  |
| H | 3.9156716516  | -0.291225059  | -0.9522422595 |
| C | 5.1230004165  | -1.8601626347 | -0.0684120565 |
| H | 4.1737492566  | -0.1098191756 | 0.7742467062  |
| C | 5.0234000772  | -2.8567533711 | -1.2291610556 |
| H | 5.1732192397  | -2.4088922848 | 0.8822186448  |
| H | 6.0678104039  | -1.307851748  | -0.15095764   |
| H | 4.9525974719  | -2.3327981032 | -2.1896661255 |

|   |              |               |               |
|---|--------------|---------------|---------------|
| H | 4.1425777695 | -3.5004401116 | -1.1385421685 |
| H | 5.9024466581 | -3.5082368572 | -1.2688558876 |
| H | 5.9024466581 | -3.5082368572 | -1.2688558876 |

TS endo 0502

E(RB3LYP) = -706.410610054 A.U.

First frequency = -524.3668 cm<sup>-1</sup>

|   |               |               |               |
|---|---------------|---------------|---------------|
| H | -1.493059037  | 0.2691197429  | -2.0008497071 |
| C | -1.192002467  | -0.5395088361 | -1.3452894449 |
| H | -0.517330336  | -1.2466277672 | -1.8104880587 |
| C | -1.9896446094 | -0.9286714385 | -0.2745313108 |
| C | -1.4784935151 | -1.9128390932 | 0.6015835344  |
| C | -0.2771170652 | -2.5686786567 | 0.3746969328  |
| H | 0.1078331564  | -3.2472609467 | 1.1314600591  |
| H | 0.0043343696  | -2.8337051975 | -0.6381988551 |
| C | 1.3174810205  | -1.0512086637 | 0.2016975547  |
| H | 1.4398655995  | -1.1150661233 | 1.2793587323  |
| C | 2.3138371627  | -1.8325265702 | -0.63101409   |
| C | 0.7564312337  | 0.1267918779  | -0.2956174079 |
| H | 1.0760467088  | 0.4592060084  | -1.2797574426 |
| C | 0.2783488574  | 1.1754486759  | 0.6770217898  |
| C | -3.3377830962 | -0.2536793982 | 0.0643837673  |
| H | -1.9542067559 | -2.0380476886 | 1.5717578464  |
| C | -3.2824863149 | 0.5123428611  | 1.405343581   |
| C | -4.4066219704 | -1.3692788186 | 0.1713151888  |
| C | -3.7983832273 | 0.7244047314  | -1.0324549953 |
| H | -3.1212278856 | 1.5771073142  | -1.1370857235 |
| H | -4.7864509037 | 1.1238935487  | -0.7808271934 |
| H | -3.8743704008 | 0.228135595   | -2.0050888918 |
| H | -4.472132571  | -1.9352303907 | -0.763507638  |
| H | -5.3914539031 | -0.9353173585 | 0.3792147275  |
| H | -4.1769680749 | -2.0766193728 | 0.9731485909  |
| H | -2.6018009913 | 1.3656453562  | 1.3459578547  |
| H | -2.9498764161 | -0.1285225448 | 2.2269525548  |
| H | -4.2763742921 | 0.89512938    | 1.6643818228  |
| H | 1.1128588484  | 1.4472768216  | 1.3399454055  |
| H | -0.4681010159 | 0.7110235397  | 1.3350895859  |



|   |               |               |               |
|---|---------------|---------------|---------------|
| C | -0.2981498595 | 2.4540955379  | 0.0565935586  |
| H | -1.1978245075 | 2.2008945639  | -0.5133859421 |
| C | 0.6640432911  | 3.2288939809  | -0.8603006795 |
| H | -0.6224937657 | 3.1185857682  | 0.8689341218  |
| H | 0.1440678579  | 4.1214721985  | -1.2307925999 |
| H | 0.8925354131  | 2.628508621   | -1.7502174541 |
| C | 1.9730899013  | 3.6488435978  | -0.1834695067 |
| H | 2.5823773024  | 4.2680401721  | -0.8498544223 |
| H | 2.5744998665  | 2.7796660396  | 0.100748579   |
| H | 1.7785375773  | 4.2284353671  | 0.7265919991  |
| C | 3.6950978968  | -1.1678348801 | -0.8193649093 |
| H | 1.884558746   | -1.9954590958 | -1.6305535213 |
| H | 2.4620082141  | -2.8300380566 | -0.1975751059 |
| H | 4.2589824842  | -1.7877752793 | -1.5289050585 |
| C | 4.5400666608  | -0.9930961988 | 0.4567553876  |
| H | 3.5629612994  | -0.1909507853 | -1.3036270363 |
| C | 4.2019619116  | 0.2434581389  | 1.2991241577  |
| H | 5.5963995149  | -0.9289948844 | 0.1660926462  |
| H | 4.4543668458  | -1.8984373093 | 1.0737332971  |
| H | 4.8779989119  | 0.3323324533  | 2.1563407707  |
| H | 3.1793113032  | 0.2155622236  | 1.6816972994  |
| H | 4.3023796235  | 1.1567022199  | 0.7012544485  |
| H | 4.3023796235  | 1.1567022199  | 0.7012544485  |

TS endo 0508

E(RB3LYP) = -706.409514078 A.U.

First frequency = -538.9501 cm<sup>-1</sup>

|   |               |               |               |
|---|---------------|---------------|---------------|
| H | -1.6881887854 | -0.7117521902 | -2.217216846  |
| C | -1.2913168468 | -1.1533790053 | -1.3102384196 |
| H | -0.7038765779 | -2.0463733473 | -1.4875860959 |
| C | -1.9467382885 | -0.9870173514 | -0.0912268745 |
| C | -1.3140597417 | -1.5003271844 | 1.0623558685  |
| C | -0.1165496285 | -2.1935628854 | 1.0127073449  |
| H | 0.3906742999  | -2.4540126567 | 1.9378671801  |
| H | 0.0907664601  | -2.8653735512 | 0.1885186556  |
| C | 1.3533995929  | -0.8701309404 | -0.0822890403 |
| H | 1.5806820345  | -0.3923712286 | 0.8632519207  |

|   |               |               |               |
|---|---------------|---------------|---------------|
| C | 2.3252755329  | -1.9475716621 | -0.516886873  |
| C | 0.6622840428  | -0.1280207487 | -1.0458582115 |
| H | 0.8633917456  | -0.3967319272 | -2.082299819  |
| C | 0.3081340829  | 1.3411590008  | -0.8569367392 |
| C | -3.2526444478 | -0.1778314901 | 0.0568698519  |
| H | -1.6761374995 | -1.1782827374 | 2.036159351   |
| C | -3.7434488823 | 0.3974099772  | -1.283982604  |
| C | -3.1066500691 | 0.9979341814  | 1.0477814757  |
| C | -4.3352038436 | -1.1478061954 | 0.5904382265  |
| H | -4.47446273   | -1.9902032992 | -0.0947852647 |
| H | -5.2957542668 | -0.6306557126 | 0.6992672698  |
| H | -4.0579112094 | -1.5552285674 | 1.5673040847  |
| H | -4.0729707052 | 1.4951628313  | 1.1893634751  |
| H | -2.3999433981 | 1.7402351625  | 0.6710720298  |
| H | -2.7590563743 | 0.6711201019  | 2.0314903193  |
| H | -3.9267060599 | -0.3908201405 | -2.0208690091 |
| H | -3.0233845374 | 1.103682728   | -1.7109808607 |
| H | -4.6840559452 | 0.9373236204  | -1.1334248545 |
| H | -0.7030031702 | 1.5422155402  | -1.2320080886 |
| H | 0.9817706484  | 1.9200026011  | -1.5049539776 |
| C | 0.4185728876  | 1.8770635505  | 0.5765820425  |
| H | -0.1886736028 | 1.2515279338  | 1.2399560608  |
| C | -0.0071281288 | 3.346280792   | 0.7220189424  |
| H | 1.4557803     | 1.7790984257  | 0.9243809002  |
| H | -0.026107124  | 3.6022306669  | 1.7889128377  |
| H | -1.0378630587 | 3.468602463   | 0.3627207145  |
| C | 0.9037579108  | 4.3367412023  | -0.0133434334 |
| H | 0.8817691781  | 4.1832828022  | -1.0969356798 |
| H | 1.9443578711  | 4.2289589354  | 0.3146245808  |
| H | 0.5991887806  | 5.3709493933  | 0.177297568   |
| C | 3.6516477671  | -1.3803163232 | -1.0685202358 |
| H | 1.8631204705  | -2.5647676992 | -1.3003048058 |
| H | 2.5384432709  | -2.6250786484 | 0.3179634884  |
| H | 4.3109750555  | -2.2198441159 | -1.3303522662 |
| C | 4.3939740655  | -0.4341888128 | -0.1117641167 |
| H | 3.441698622   | -0.8436046319 | -2.0024867286 |
| C | 4.7545493392  | -1.0668233155 | 1.2365100621  |
| H | 3.7811020967  | 0.4603131354  | 0.0573910105  |

|   |              |               |               |
|---|--------------|---------------|---------------|
| H | 5.3101104109 | -0.0864508156 | -0.6055822484 |
| H | 5.3464133408 | -0.380572837  | 1.8508239644  |
| H | 5.3410363226 | -1.9828597328 | 1.0988984574  |
| H | 3.8599034084 | -1.3319193951 | 1.8098491513  |
| H | 3.8599034084 | -1.3319193951 | 1.8098491513  |

TS endo 0515

E(RB3LYP) = -706.409644927 A.U.

First frequency = -528.0273 cm<sup>-1</sup>

|   |               |               |               |
|---|---------------|---------------|---------------|
| H | -0.8979058005 | -0.3121096617 | -1.9372866971 |
| C | -0.781658312  | -0.8851821524 | -1.0247580132 |
| H | 0.0314256124  | -1.5979407879 | -1.0599445918 |
| C | -1.8620343003 | -1.1093819652 | -0.1760562453 |
| C | -1.6009900947 | -1.7556919995 | 1.052452025   |
| C | -0.3347782384 | -2.1806077751 | 1.4196983613  |
| H | -0.1703018376 | -2.5630386761 | 2.423565196   |
| H | 0.3474349522  | -2.5777038664 | 0.6770287942  |
| C | 1.0166228332  | -0.3927796632 | 1.3301121711  |
| H | 0.6241030434  | -0.0732842782 | 2.2934795432  |
| C | 2.3588830533  | -1.1055660109 | 1.4268286291  |
| C | 0.6077496562  | 0.3643670386  | 0.2277548728  |
| H | 1.2637530475  | 0.4083836604  | -0.6353188061 |
| C | -0.2658909554 | 1.5777502478  | 0.4552630866  |
| C | -3.2791830087 | -0.5659668313 | -0.4581818915 |
| H | -2.3739177453 | -1.7448490468 | 1.8171803885  |
| C | -3.7989195591 | 0.3458426708  | 0.6766799095  |
| C | -4.2212171871 | -1.7883319541 | -0.5836499983 |
| C | -3.3499491721 | 0.2327101302  | -1.7721614243 |
| H | -2.7074084324 | 1.1188921446  | -1.7414796189 |
| H | -4.3759942883 | 0.5742709122  | -1.9438658058 |
| H | -3.0540701944 | -0.3753737108 | -2.6327435529 |
| H | -4.2407616341 | -2.3725305784 | 0.3414097988  |
| H | -3.8916890895 | -2.4515757648 | -1.3899396994 |
| H | -5.2457192565 | -1.4646868993 | -0.8017231755 |
| H | -4.8323180548 | 0.6480190111  | 0.4722327991  |
| H | -3.1954844707 | 1.2535920153  | 0.7610928694  |
| H | -3.7908662659 | -0.1558882801 | 1.6479565021  |

|   |               |               |               |
|---|---------------|---------------|---------------|
| H | -1.0842495303 | 1.2938633479  | 1.1262804094  |
| H | -0.7323823675 | 1.8920583197  | -0.4846223394 |
| C | 0.4892092424  | 2.7695358997  | 1.0817846001  |
| H | -0.2109816935 | 3.6107136701  | 1.1839870502  |
| C | 1.7263429357  | 3.2344495949  | 0.2976818921  |
| H | 0.7993587934  | 2.4962029177  | 2.0984695746  |
| H | 2.482022464   | 2.4390109621  | 0.3139867841  |
| H | 2.1740701317  | 4.0880398111  | 0.8222411271  |
| C | 1.4347348304  | 3.6288261817  | -1.1540129031 |
| H | 2.330097339   | 4.0228818691  | -1.6456931336 |
| H | 0.6578142543  | 4.4006953494  | -1.2054340922 |
| H | 1.0867282706  | 2.7730024042  | -1.7422314193 |
| C | 3.0159985843  | -1.5298151333 | 0.0974212605  |
| H | 2.2514056353  | -1.9853102553 | 2.0725397004  |
| H | 3.0558965789  | -0.4432571685 | 1.9634858446  |
| H | 3.6253095564  | -2.4262963403 | 0.2686122226  |
| C | 3.9157268379  | -0.4587555042 | -0.5372611547 |
| H | 2.2449259178  | -1.8318327451 | -0.623758241  |
| C | 4.4881829434  | -0.8912721982 | -1.8894334118 |
| H | 4.7356652338  | -0.2323337439 | 0.1575883289  |
| H | 3.3599162036  | 0.4780769573  | -0.657560725  |
| H | 5.1456092     | -0.1249974253 | -2.3126620146 |
| H | 3.6865938249  | -1.0799781061 | -2.6129562583 |
| H | 5.0696701381  | -1.815651223  | -1.794709608  |
| H | 5.0696701381  | -1.815651223  | -1.794709608  |

TS endo 0523

E(RB3LYP) = -706.409979878 A.U.

First frequency = -518.0889  $\text{cm}^{-1}$

|   |               |               |               |
|---|---------------|---------------|---------------|
| H | -0.9103939056 | -0.502849381  | -2.0206664789 |
| C | -0.7017809424 | -0.9764409938 | -1.0686547423 |
| H | 0.1860299338  | -1.5937377399 | -1.0738266113 |
| C | -1.7213175819 | -1.2520750396 | -0.163126293  |
| C | -1.3487142666 | -1.7597749369 | 1.1021107968  |
| C | -0.0312862494 | -1.9864320457 | 1.4615515479  |
| H | 0.2022364572  | -2.2593444418 | 2.4872092895  |
| H | 0.691630381   | -2.3330698014 | 0.7340922726  |

|   |               |               |               |
|---|---------------|---------------|---------------|
| C | 1.025380924   | -0.0164925863 | 1.209004305   |
| H | 0.5114332527  | 0.3381337702  | 2.1000849431  |
| C | 2.4675255996  | -0.4279186233 | 1.4883350827  |
| C | 0.5812096277  | 0.5389894751  | 0.0043727465  |
| H | 1.2701149239  | 0.5413923706  | -0.8360132414 |
| C | -0.4085260386 | 1.6852292719  | 0.0433489408  |
| C | -3.2014132118 | -0.9051428175 | -0.4301331278 |
| H | -2.0984536518 | -1.7846103796 | 1.8893069898  |
| C | -3.7920794543 | 0.0261997919  | 0.6531875837  |
| C | -3.992981138  | -2.2357567051 | -0.4258904948 |
| C | -3.4064993008 | -0.2268789291 | -1.7965230731 |
| H | -2.8738130993 | 0.7278212803  | -1.8570034519 |
| H | -4.4707362728 | -0.0228233348 | -1.9535951745 |
| H | -3.0654146623 | -0.8624323899 | -2.6197106749 |
| H | -5.0553150695 | -2.0529260587 | -0.6256844276 |
| H | -3.913237865  | -2.7437039795 | 0.5400660054  |
| H | -3.6115803561 | -2.916971666  | -1.1933800175 |
| H | -4.8584505651 | 0.1937839756  | 0.4640432771  |
| H | -3.2953728619 | 1.0003826234  | 0.650372125   |
| H | -3.7001407236 | -0.3956392081 | 1.6575089941  |
| H | -1.2228017372 | 1.4149237617  | 0.7245170853  |
| H | -0.8611463383 | 1.8358377961  | -0.9444578993 |
| C | 0.2146388592  | 3.0130852452  | 0.5180038543  |
| H | -0.5779427309 | 3.7712267206  | 0.5921181414  |
| C | 1.3287726123  | 3.5413107337  | -0.3929981513 |
| H | 0.6123191924  | 2.879769524   | 1.5334381183  |
| H | 0.9422168262  | 3.6378709417  | -1.4173180891 |
| H | 2.1393270343  | 2.802920425   | -0.4414933418 |
| C | 1.892235991   | 4.8858817831  | 0.074884517   |
| H | 2.6877815738  | 5.2431222574  | -0.587340603  |
| H | 2.3098402387  | 4.8060847372  | 1.0852086567  |
| H | 1.1104350805  | 5.6536836614  | 0.1023373343  |
| C | 3.4180824187  | -0.6096866787 | 0.2956135867  |
| H | 2.4965380354  | -1.339508883  | 2.100697332   |
| H | 2.8917356681  | 0.3590420047  | 2.1295330779  |
| H | 3.4279360994  | 0.3044449574  | -0.3131430075 |
| C | 3.1302258112  | -1.8169232288 | -0.604027423  |
| H | 4.4365295958  | -0.7122339933 | 0.6939758725  |

|   |              |               |               |
|---|--------------|---------------|---------------|
| C | 4.1782545212 | -1.9940808621 | -1.7065607872 |
| H | 2.1419067817 | -1.7104948125 | -1.0639282406 |
| H | 3.0853273272 | -2.7246044743 | 0.0129626788  |
| H | 5.1776197916 | -2.1401839696 | -1.2809678175 |
| H | 4.221593836  | -1.1094052761 | -2.3521996468 |
| H | 3.9546294844 | -2.8585399058 | -2.3399085799 |
| H | 3.9546294844 | -2.8585399058 | -2.3399085799 |

TS endo 0524

E(RB3LYP) = -706.407987956 A.U.

First frequency = -531.3957  $\text{cm}^{-1}$

|   |               |               |               |
|---|---------------|---------------|---------------|
| H | -0.9892292983 | -0.5092943062 | -2.0693780756 |
| C | -0.8464731591 | -1.0337005225 | -1.1316452104 |
| H | -0.1552510242 | -1.863388062  | -1.1997619427 |
| C | -1.839115113  | -1.0385762467 | -0.1550311361 |
| C | -1.5271912665 | -1.6389583741 | 1.0844540653  |
| C | -0.2981874448 | -2.2239704326 | 1.3420827039  |
| H | -0.068497202  | -2.5633887967 | 2.348618831   |
| H | 0.2272536017  | -2.7631586435 | 0.5622614236  |
| C | 1.2686084044  | -0.6651680847 | 0.960808617   |
| H | 1.0412344581  | -0.2320338925 | 1.9329835803  |
| C | 2.5034837401  | -1.5566876404 | 0.968147118   |
| C | 0.8346763256  | 0.0753293499  | -0.1446590701 |
| H | 1.3838931339  | -0.0160022534 | -1.0767393979 |
| C | 0.1674552905  | 1.4112974206  | 0.0899340389  |
| C | -3.1854105129 | -0.3010459666 | -0.320211706  |
| H | -2.1926637933 | -1.4639445502 | 1.9264944028  |
| C | -3.3089512111 | 0.3960099554  | -1.6871024678 |
| C | -3.4114107936 | 0.7659165539  | 0.775507445   |
| C | -4.3067087938 | -1.3637984962 | -0.217799609  |
| H | -4.1868224407 | -2.1304990826 | -0.9900545494 |
| H | -5.2912335127 | -0.8986479726 | -0.3451426484 |
| H | -4.2933599556 | -1.8653497169 | 0.7545812714  |
| H | -4.4089453186 | 1.207416679   | 0.6702328587  |
| H | -2.6782146127 | 1.5730156866  | 0.6974962885  |
| H | -3.3435514347 | 0.3455682342  | 1.7825065124  |
| H | -2.5485835255 | 1.1735569614  | -1.8155353979 |

|   |               |               |               |
|---|---------------|---------------|---------------|
| H | -4.2891705829 | 0.8766881582  | -1.7710375854 |
| H | -3.2148330462 | -0.3143655527 | -2.5144166692 |
| H | -0.543085637  | 1.3046875804  | 0.91908656    |
| H | -0.4183176996 | 1.702002224   | -0.7877363511 |
| C | 1.1702653156  | 2.5274742678  | 0.4349907606  |
| H | 1.7827141894  | 2.1993285535  | 1.2843977874  |
| C | 0.5098975071  | 3.8727653212  | 0.7754072934  |
| H | 1.8642119368  | 2.6633058845  | -0.4070510083 |
| H | 1.2877268653  | 4.5757436087  | 1.1001187367  |
| H | -0.15683359   | 3.7358027349  | 1.6380980051  |
| C | -0.2779197392 | 4.4980607014  | -0.3818875617 |
| H | -0.6617994443 | 5.4869372695  | -0.1106874502 |
| H | -1.1355871199 | 3.8818290136  | -0.6702620128 |
| H | 0.356157713   | 4.6176467219  | -1.2683612893 |
| C | 2.9674283711  | -2.0990067403 | -0.399548296  |
| H | 2.3387436177  | -2.3977968959 | 1.6521709172  |
| H | 3.3252711486  | -0.9840148729 | 1.4226285979  |
| H | 3.4724428695  | -3.0619738045 | -0.2507068734 |
| C | 3.9264675228  | -1.1697317446 | -1.1688035325 |
| H | 2.0907945317  | -2.3186817052 | -1.0211971412 |
| C | 5.3408110801  | -1.1320567907 | -0.5784620309 |
| H | 3.5186857104  | -0.1524573618 | -1.1920897489 |
| H | 3.9856060639  | -1.5024310681 | -2.2128688928 |
| H | 5.795664031   | -2.129351926  | -0.5868430086 |
| H | 5.3388394719  | -0.7797954847 | 0.4585584872  |
| H | 5.9915953383  | -0.4624571637 | -1.1501493253 |
| H | 5.9915953383  | -0.4624571637 | -1.1501493253 |

TS endo 0525

E(RB3LYP) = -706.410009281 A.U.

First frequency = -513.4229  $\text{cm}^{-1}$

|   |               |               |               |
|---|---------------|---------------|---------------|
| H | -2.1376201641 | -0.4861806128 | -2.2354922339 |
| C | -1.5306578998 | -0.9080829485 | -1.4395245466 |
| H | -0.7835049685 | -1.6091765573 | -1.7911209908 |
| C | -2.045815908  | -1.0128197629 | -0.148792231  |
| C | -1.1785165703 | -1.4736393254 | 0.8670748517  |
| C | 0.1089074458  | -1.9140759695 | 0.6179737888  |

|   |               |               |               |
|---|---------------|---------------|---------------|
| H | 0.7574569904  | -2.1511463016 | 1.4558856102  |
| H | 0.3474485199  | -2.4401653009 | -0.2982576612 |
| C | 1.1799011302  | -0.1990291201 | -0.4860856663 |
| H | 1.4144171367  | 0.1629412297  | 0.5076537267  |
| C | 2.2639141459  | -0.9837770397 | -1.2017423069 |
| C | 0.2144314642  | 0.4968162182  | -1.212250553  |
| H | 0.3101032655  | 0.4797965044  | -2.2979021088 |
| C | -0.4409115187 | 1.7319287366  | -0.6410803707 |
| C | -3.4919600752 | -0.5658621308 | 0.1610311059  |
| H | -1.4611599979 | -1.3197358087 | 1.9034576708  |
| C | -4.438212703  | -1.6115591893 | -0.4798868471 |
| C | -3.8234500529 | 0.8230806029  | -0.4245615085 |
| C | -3.7866907544 | -0.5160610546 | 1.6723104099  |
| H | -3.6547248436 | -1.493516417  | 2.1465254569  |
| H | -4.8249842825 | -0.2094771373 | 1.8359826067  |
| H | -3.1424920343 | 0.2052440695  | 2.1861852656  |
| H | -4.8838112982 | 1.050050534   | -0.2673746808 |
| H | -3.6358194214 | 0.8765734053  | -1.5004913952 |
| H | -3.2364056562 | 1.6060557264  | 0.0619692501  |
| H | -4.2344763423 | -2.6128293859 | -0.0865637237 |
| H | -4.3062164993 | -1.6460729846 | -1.5657053822 |
| H | -5.486474358  | -1.3673229694 | -0.2703903918 |
| H | -0.7227177521 | 1.5357054633  | 0.4009114988  |
| H | -1.3720729099 | 1.9341741996  | -1.1768059172 |
| C | 0.4305825221  | 3.0070372678  | -0.7298290457 |
| H | 0.6743284574  | 3.1858571216  | -1.7858329747 |
| C | 1.7324541178  | 3.0130272922  | 0.0858981539  |
| H | -0.1864532064 | 3.8595615258  | -0.4119258004 |
| H | 2.2675158165  | 3.947127565   | -0.1283697099 |
| H | 2.3867518999  | 2.2035224459  | -0.2573684398 |
| C | 1.5224460308  | 2.8979592992  | 1.599526614   |
| H | 1.0509272434  | 1.9494551337  | 1.8766267209  |
| H | 0.8758244296  | 3.7026202922  | 1.9689152312  |
| H | 2.4742359849  | 2.9610854515  | 2.1373130234  |
| C | 3.3504719659  | -1.5695126357 | -0.288417236  |
| H | 2.7514392162  | -0.3291360012 | -1.9396487969 |
| H | 1.8058116476  | -1.7904896643 | -1.7936429521 |
| H | 2.8925009863  | -2.2209632863 | 0.4662919024  |



|   |              |               |               |
|---|--------------|---------------|---------------|
| C | 4.2079814277 | -0.5067198477 | 0.412503733   |
| H | 4.0087926969 | -2.2131189562 | -0.886803076  |
| C | 5.3013321122 | -1.1153794934 | 1.295030491   |
| H | 3.5712175344 | 0.1455047921  | 1.0232079108  |
| H | 4.6639135924 | 0.1428835349  | -0.3474116449 |
| H | 5.9779228481 | -1.7459798583 | 0.7068615718  |
| H | 4.8671934697 | -1.743374477  | 2.0815316422  |
| H | 5.9041117239 | -0.3414730335 | 1.7812033834  |
| H | 5.9041117239 | -0.3414730335 | 1.7812033834  |

TS endo 0526

E(RB3LYP) = -706.411186526 A.U.

First frequency = -531.6372  $\text{cm}^{-1}$

|   |               |               |               |
|---|---------------|---------------|---------------|
| H | -1.3691195008 | 0.3758394161  | -2.1455040739 |
| C | -0.9707076668 | -0.3820488857 | -1.4813239169 |
| H | -0.3159100159 | -1.0893590518 | -1.9741923574 |
| C | -1.6430413559 | -0.7385162222 | -0.3176652966 |
| C | -1.0071661782 | -1.6519037743 | 0.5541390875  |
| C | 0.1846936475  | -2.2858674161 | 0.2404530882  |
| H | 0.6642717096  | -2.9105188325 | 0.9884142998  |
| H | 0.3746837799  | -2.5908119062 | -0.7822831573 |
| C | 1.7129192429  | -0.7180454593 | -0.2068925488 |
| H | 1.9689997632  | -0.7220875238 | 0.8487830808  |
| C | 2.6502322173  | -1.4731785642 | -1.1327410356 |
| C | 1.0391509713  | 0.4109517061  | -0.6736554001 |
| H | 1.228467972   | 0.7312434767  | -1.6968194112 |
| C | 0.62891259    | 1.4814270377  | 0.3074374568  |
| C | -2.9835125302 | -0.1033433694 | 0.1139251922  |
| H | -1.3795097515 | -1.7390576969 | 1.5724705815  |
| C | -3.9896934251 | -1.2556609862 | 0.3554624817  |
| C | -3.5792147329 | 0.8129125537  | -0.9709948139 |
| C | -2.8437636154 | 0.7163114625  | 1.4156661117  |
| H | -3.8248880341 | 1.077181128   | 1.7450511535  |
| H | -2.2017462587 | 1.5869769108  | 1.2635153654  |
| H | -2.4188094028 | 0.1221245187  | 2.229603819   |
| H | -2.9482920514 | 1.6848498795  | -1.1673144775 |
| H | -4.5559504547 | 1.1855844528  | -0.6449879839 |

|   |               |               |               |
|---|---------------|---------------|---------------|
| H | -3.7225062375 | 0.2766756923  | -1.9143431641 |
| H | -4.9699499942 | -0.8540085427 | 0.6371003783  |
| H | -3.6578267487 | -1.9220433459 | 1.1566741629  |
| H | -4.1137341295 | -1.8590016665 | -0.5495774322 |
| H | 1.5253693589  | 1.8261899909  | 0.8464221477  |
| H | -0.0134992761 | 1.0250728547  | 1.0739217174  |
| C | -0.0626084756 | 2.6955845302  | -0.3142207477 |
| H | 0.5616791836  | 3.091700263   | -1.1279158763 |
| C | -0.3470647823 | 3.8175954419  | 0.6898369215  |
| H | -1.0004164608 | 2.3773894366  | -0.7826723219 |
| H | 0.601710293   | 4.1727415648  | 1.1143888396  |
| H | -0.9216652082 | 3.4153331604  | 1.5350476511  |
| C | -1.1083660398 | 4.9916248522  | 0.0683546777  |
| H | -2.0786443117 | 4.6652487201  | -0.3236259546 |
| H | -0.5468521078 | 5.4285601113  | -0.7654141664 |
| H | -1.2935752073 | 5.7857657561  | 0.7988873985  |
| C | 3.2906245277  | -2.7553209514 | -0.5705012345 |
| H | 3.4548985541  | -0.7896510532 | -1.4383999402 |
| H | 2.1179088362  | -1.7192203635 | -2.0633014083 |
| H | 2.5304913724  | -3.536250542  | -0.4586853015 |
| C | 4.0255067574  | -2.5855932297 | 0.7697145714  |
| H | 4.0029659602  | -3.1307772332 | -1.3173931889 |
| C | 5.117545577   | -1.5107615968 | 0.7518965847  |
| H | 4.4696451392  | -3.5507423863 | 1.0441903114  |
| H | 3.3016672651  | -2.3560232745 | 1.5619942166  |
| H | 5.6652358684  | -1.4868547745 | 1.6994964931  |
| H | 4.6962313372  | -0.5133717809 | 0.5895088655  |
| H | 5.8426902764  | -1.6986513537 | -0.0486233028 |
| H | 5.8426902764  | -1.6986513537 | -0.0486233028 |

TS endo 0534

E(RB3LYP) = -706.408768125 A.U.

First frequency = -512.4960 cm<sup>-1</sup>

|   |               |               |               |
|---|---------------|---------------|---------------|
| H | -1.7799481012 | -0.4606048464 | -2.2536144404 |
| C | -1.308582012  | -0.8912592206 | -1.3747595472 |
| H | -0.4640112605 | -1.5290301111 | -1.6053188445 |
| C | -2.049716089  | -1.0935702832 | -0.2123770343 |

|   |               |               |               |
|---|---------------|---------------|---------------|
| C | -1.3608237086 | -1.5596240271 | 0.9296720015  |
| C | -0.0233542044 | -1.9120343208 | 0.9127402468  |
| H | 0.4683051931  | -2.1586231114 | 1.8486898176  |
| H | 0.4174123622  | -2.3733409939 | 0.0371409044  |
| C | 1.1286901782  | -0.085596747  | 0.1090372307  |
| H | 1.165586432   | 0.2440685787  | 1.1428488086  |
| C | 2.3739169169  | -0.7667885015 | -0.4272483467 |
| C | 0.2727652006  | 0.5941070182  | -0.7566198765 |
| H | 0.5655073641  | 0.6339369807  | -1.8056829679 |
| C | -0.5522478282 | 1.763404689   | -0.2733972096 |
| C | -3.5544889444 | -0.7465140938 | -0.1664071111 |
| H | -1.8428435598 | -1.4788452807 | 1.8985737428  |
| C | -4.2919481632 | -1.8050596669 | -1.023895615  |
| C | -3.8593996589 | 0.6529238958  | -0.7412738534 |
| C | -4.1322692733 | -0.7994094457 | 1.2607102485  |
| H | -4.0278259587 | -1.7932246821 | 1.7069684079  |
| H | -5.2007637645 | -0.5616722847 | 1.2353367045  |
| H | -3.6460224635 | -0.0732772825 | 1.9207039302  |
| H | -4.94282702   | 0.8118396441  | -0.7803338306 |
| H | -3.4759397896 | 0.7776767364  | -1.7577554714 |
| H | -3.4267098617 | 1.4380733817  | -0.1160640196 |
| H | -5.374627291  | -1.6319547058 | -1.008751339  |
| H | -4.1010121503 | -2.8142164798 | -0.6445593127 |
| H | -3.9552883675 | -1.7702857635 | -2.064604252  |
| H | -0.9790572976 | 1.515882834   | 0.7081373964  |
| H | -1.3966479369 | 1.9205427686  | -0.9492423967 |
| C | 0.2270500007  | 3.0938750959  | -0.1776057757 |
| H | 0.6471040224  | 3.3345929389  | -1.1647464391 |
| C | 1.3475116455  | 3.1388118758  | 0.8669916568  |
| H | -0.4941736514 | 3.8930074055  | 0.0453047061  |
| H | 2.1139615198  | 2.3966273262  | 0.6172558533  |
| H | 0.9425854232  | 2.8416558302  | 1.8445327762  |
| C | 1.9938159775  | 4.5232477643  | 0.9761169982  |
| H | 1.2581434999  | 5.2830762461  | 1.2641320483  |
| H | 2.4260743743  | 4.831721828   | 0.0171007511  |
| H | 2.7957038446  | 4.5356009516  | 1.7216613417  |
| C | 3.2693913257  | -1.3932726586 | 0.6484053948  |
| H | 2.9577326333  | -0.0271016353 | -0.9918032915 |

|   |              |               |               |
|---|--------------|---------------|---------------|
| H | 2.0935001614 | -1.5353029131 | -1.1652425779 |
| H | 3.5554129449 | -0.6132579367 | 1.3687361456  |
| C | 4.5375188138 | -2.0655286071 | 0.1002657525  |
| H | 2.6934041385 | -2.1334563774 | 1.214440861   |
| C | 5.5310729549 | -1.0999119451 | -0.5565235664 |
| H | 4.2494719292 | -2.8423581648 | -0.6215618081 |
| H | 5.0407744239 | -2.5883934542 | 0.9233977886  |
| H | 5.1092546718 | -0.622204837  | -1.4464760439 |
| H | 6.4428651487 | -1.6210931471 | -0.8659007807 |
| H | 5.8212905397 | -0.3041536395 | 0.1395708445  |
| H | 5.8212905397 | -0.3041536395 | 0.1395708445  |

TS endo 0538

E(RB3LYP) = -706.409568041 A.U.

First frequency = -530.6664  $\text{cm}^{-1}$

|   |               |               |               |
|---|---------------|---------------|---------------|
| H | -1.2053591174 | -0.3536168692 | -2.1109477858 |
| C | -1.0336805343 | -0.9716221881 | -1.2379261426 |
| H | -0.4664057903 | -1.8692165361 | -1.4476129671 |
| C | -1.8977297755 | -0.9264713442 | -0.1473060133 |
| C | -1.5472135161 | -1.6775784911 | 0.9963454762  |
| C | -0.4267922821 | -2.4947812728 | 1.0370603912  |
| H | -0.1492268132 | -2.9712732863 | 1.9737361587  |
| H | -0.1442144466 | -3.0586368287 | 0.1554154961  |
| C | 1.3488274424  | -1.2726995335 | 0.5580287202  |
| H | 1.4317872968  | -0.9999915455 | 1.6085237884  |
| C | 2.2835955266  | -2.3746250645 | 0.0999419789  |
| C | 0.9462707524  | -0.2609099045 | -0.3201572646 |
| H | 1.3384210862  | -0.2893757502 | -1.3344854585 |
| C | 0.5649327374  | 1.0984922403  | 0.2180075694  |
| C | -3.1512210398 | -0.0246081764 | -0.1013628433 |
| H | -2.0665355572 | -1.4762874192 | 1.9297553549  |
| C | -3.2846509605 | 0.8681392399  | -1.3481652338 |
| C | -3.1814632841 | 0.8931788084  | 1.1419345218  |
| C | -4.380021458  | -0.965701514  | -0.0474132523 |
| H | -4.354156422  | -1.5996206159 | 0.8442269732  |
| H | -4.4045432539 | -1.6223751467 | -0.9230659518 |
| H | -5.3101321054 | -0.3856259498 | -0.0264122327 |

|   |               |               |               |
|---|---------------|---------------|---------------|
| H | -2.3492294967 | 1.60238106    | 1.1342547094  |
| H | -3.133223929  | 0.3292310796  | 2.0770998991  |
| H | -4.1122201735 | 1.4711717055  | 1.1575074337  |
| H | -2.4467854466 | 1.5658419233  | -1.4376540308 |
| H | -4.2028379683 | 1.4609756244  | -1.2821452779 |
| H | -3.3395189875 | 0.2768354517  | -2.2673403458 |
| H | 1.3250478888  | 1.4271375103  | 0.9401126336  |
| H | -0.360123614  | 1.000622032   | 0.8007726984  |
| C | 0.4105153833  | 2.1656673265  | -0.8704870121 |
| H | 1.3889226869  | 2.3283418155  | -1.345113521  |
| C | -0.1413184994 | 3.5092526647  | -0.3738996499 |
| H | -0.2455947057 | 1.7766981931  | -1.6575846679 |
| H | -1.1449330705 | 3.3542929642  | 0.0449347617  |
| H | -0.2730413569 | 4.1762217555  | -1.2355060611 |
| C | 0.7435744389  | 4.203419394   | 0.6676888162  |
| H | 0.8171225741  | 3.6193666855  | 1.5905343827  |
| H | 0.3455619181  | 5.1883215652  | 0.9327629592  |
| H | 1.7610537207  | 4.3456357879  | 0.2848473492  |
| C | 3.7933662463  | -2.0730986523 | 0.2363683509  |
| H | 2.0663716447  | -2.6082016902 | -0.9523881771 |
| H | 2.0854157652  | -3.2953611802 | 0.6630762146  |
| H | 4.0308491425  | -1.899221191  | 1.2950163105  |
| C | 4.3333143432  | -0.8996756949 | -0.6082946454 |
| H | 4.3262929769  | -2.9913136077 | -0.04200777   |
| C | 4.3489197556  | 0.4487859514  | 0.1203180066  |
| H | 3.7452261962  | -0.8155240827 | -1.5315677236 |
| H | 5.3571529233  | -1.1321293236 | -0.926746714  |
| H | 3.3525739661  | 0.7270543722  | 0.4689412489  |
| H | 4.7133869457  | 1.2501571891  | -0.531493215  |
| H | 5.0066117732  | 0.4070200946  | 0.9962076745  |
| H | 5.0066117732  | 0.4070200946  | 0.9962076745  |

TS endo 0546

E(RB3LYP) = -706.410181250 A.U.

First frequency = -535.6226  $\text{cm}^{-1}$

|   |               |               |               |
|---|---------------|---------------|---------------|
| H | -1.7016429583 | -0.2057170628 | -2.1111869547 |
| C | -1.1636565405 | -0.7266461286 | -1.3278225739 |

|   |               |               |               |
|---|---------------|---------------|---------------|
| H | -0.4592329897 | -1.4594690787 | -1.7008844514 |
| C | -1.7076199205 | -0.8596052078 | -0.054417031  |
| C | -0.9022190651 | -1.4527362601 | 0.9440013655  |
| C | 0.3399903317  | -2.0078899569 | 0.6792560894  |
| H | 0.9433353047  | -2.3666381962 | 1.5081121028  |
| H | 0.5033717742  | -2.5377705532 | -0.2522069292 |
| C | 1.6152730159  | -0.4430070773 | -0.293280087  |
| H | 1.9570920022  | -0.1693412994 | 0.700748819   |
| C | 2.5530784662  | -1.3018242732 | -1.1241018195 |
| C | 0.7615502875  | 0.459775636   | -0.9282125315 |
| H | 0.8319715988  | 0.5492014197  | -2.0110139744 |
| C | 0.2883275306  | 1.6811916469  | -0.1780857857 |
| C | -3.0903526447 | -0.2940650455 | 0.3384732072  |
| H | -1.193755633  | -1.3278670995 | 1.9845251793  |
| C | -2.9814798667 | 0.8171732261  | 1.4056740534  |
| C | -3.9235443229 | -1.463444305  | 0.918855004   |
| C | -3.8609588952 | 0.272538587   | -0.8681947387 |
| H | -3.9922237889 | -0.4814954987 | -1.6506113391 |
| H | -3.3572410325 | 1.1378438527  | -1.3092348056 |
| H | -4.8555587562 | 0.6024231608  | -0.5502314816 |
| H | -4.9286144078 | -1.119407085  | 1.1892135191  |
| H | -3.460132188  | -1.8839366532 | 1.8158874991  |
| H | -4.0232015005 | -2.2705600102 | 0.1859281958  |
| H | -2.4649345839 | 1.6932999472  | 1.0068594693  |
| H | -2.4390804113 | 0.480964713   | 2.2937938729  |
| H | -3.9800831122 | 1.1345164773  | 1.7271984436  |
| H | 1.171877718   | 2.2148783248  | 0.1998211214  |
| H | -0.2605457612 | 1.3538724335  | 0.7163660063  |
| C | -0.5670524525 | 2.6430019776  | -1.0072855165 |
| H | -0.0192306372 | 2.9111338553  | -1.9223059201 |
| C | -0.9728294662 | 3.9312985179  | -0.2747403745 |
| H | -1.4673927613 | 2.114999543   | -1.3380951979 |
| H | -1.4907428825 | 3.6738513085  | 0.6588896652  |
| H | -1.7065229207 | 4.4686532691  | -0.8889747214 |
| C | 0.1975953299  | 4.8710236322  | 0.0384077994  |
| H | 0.918593578   | 4.4105100763  | 0.7212516228  |
| H | -0.1525588186 | 5.7966243038  | 0.5069055264  |
| H | 0.7365296983  | 5.1429232382  | -0.876757039  |

|   |              |               |               |
|---|--------------|---------------|---------------|
| C | 3.4514821809 | -2.2786250243 | -0.3494405201 |
| H | 3.2035605181 | -0.6382594851 | -1.7139948297 |
| H | 1.9639302845 | -1.8608244227 | -1.8663775672 |
| H | 2.8397871168 | -2.9927819269 | 0.2145250225  |
| C | 4.4425782463 | -1.6003001028 | 0.6052521474  |
| H | 4.0189210169 | -2.876077261  | -1.0756514397 |
| C | 5.367968165  | -2.6016863045 | 1.3027028948  |
| H | 3.8971150916 | -1.0251018887 | 1.3636963929  |
| H | 5.0418955133 | -0.8707158224 | 0.0434671362  |
| H | 6.0679190843 | -2.1005747466 | 1.9791650702  |
| H | 5.9565849471 | -3.1693534859 | 0.572880611   |
| H | 4.7921873754 | -3.3236553965 | 1.8932664717  |
| H | 4.7921873754 | -3.3236553965 | 1.8932664717  |

TS endo 0548

E(RB3LYP) = -706.408111397 A.U.

First frequency = -532.7275 cm<sup>-1</sup>

|   |               |               |               |
|---|---------------|---------------|---------------|
| H | -1.5504820659 | -0.2376488584 | -2.2781253302 |
| C | -1.0970584384 | -0.7066960618 | -1.4121833743 |
| H | -0.1968346955 | -1.2634967834 | -1.6477464329 |
| C | -1.8780776519 | -1.0805776924 | -0.3182579442 |
| C | -1.2068951093 | -1.5889429656 | 0.8144411887  |
| C | 0.161611562   | -1.793272674  | 0.8526350656  |
| H | 0.628320234   | -2.0726711379 | 1.7925481279  |
| H | 0.6929071227  | -2.1318295505 | -0.0284999233 |
| C | 1.1357206487  | 0.195488385   | 0.233226091   |
| H | 1.128154354   | 0.4481740875  | 1.2896044163  |
| C | 2.4444590272  | -0.3239669112 | -0.3283960099 |
| C | 0.2233458936  | 0.8529846582  | -0.5976084846 |
| H | 0.543732678   | 1.049891213   | -1.6205791617 |
| C | -0.7599644056 | 1.8468630716  | -0.0210623437 |
| C | -3.3996724326 | -0.8317089051 | -0.2446137737 |
| H | -1.7549622557 | -1.6562810614 | 1.751418247   |
| C | -4.0845990339 | -2.2123893613 | -0.0949026083 |
| C | -3.9490331713 | -0.1616039013 | -1.5169861763 |
| C | -3.7925914467 | 0.0494067866  | 0.9636162268  |
| H | -4.8826522592 | 0.149085908   | 1.0171179163  |

|   |               |               |               |
|---|---------------|---------------|---------------|
| H | -3.3668145192 | 1.0521965011  | 0.8773180302  |
| H | -3.4567356944 | -0.3776970385 | 1.9123810393  |
| H | -3.5143608819 | 0.830972611   | -1.6749763274 |
| H | -5.0333296678 | -0.0359442279 | -1.4309993393 |
| H | -3.7542545604 | -0.7652583152 | -2.4090138036 |
| H | -5.1741979957 | -2.099428564  | -0.0506310879 |
| H | -3.7599539708 | -2.720884697  | 0.817892667   |
| H | -3.8409292135 | -2.8610658718 | -0.9425434983 |
| H | -1.0821355611 | 1.4802995277  | 0.9615777898  |
| H | -1.6593306141 | 1.8782867837  | -0.6458251152 |
| C | -0.2524869379 | 3.2992280139  | 0.1283533607  |
| H | 0.0186517054  | 3.6915144784  | -0.8617866304 |
| C | 0.9224590237  | 3.5220150801  | 1.1036165486  |
| H | -1.1105308826 | 3.8978869674  | 0.4604492592  |
| H | 0.8655224046  | 2.7861586143  | 1.916253655   |
| H | 0.8068660898  | 4.5030663187  | 1.5812088847  |
| C | 2.3067115889  | 3.4660873299  | 0.4478503421  |
| H | 3.1043883466  | 3.6013068018  | 1.1863417313  |
| H | 2.4103778942  | 4.257910413   | -0.3029998836 |
| H | 2.4726051     | 2.5111962418  | -0.0546966852 |
| C | 3.3866097028  | -0.9240104071 | 0.7222808023  |
| H | 2.9756820866  | 0.4951401265  | -0.8372790539 |
| H | 2.235994228   | -1.0598653206 | -1.1188902095 |
| H | 3.5353374643  | -0.1796013889 | 1.5160710377  |
| C | 4.7548812322  | -1.3482018125 | 0.1687953758  |
| H | 2.9084817938  | -1.7882831472 | 1.1994165989  |
| C | 4.6886965122  | -2.5013923948 | -0.839476176  |
| H | 5.3978973224  | -1.6434757966 | 1.0075216145  |
| H | 5.2417435698  | -0.4806466849 | -0.2976097283 |
| H | 4.1888345468  | -3.3742473406 | -0.4031730507 |
| H | 5.6907462651  | -2.8125380703 | -1.1520353071 |
| H | 4.1362133289  | -2.2218583939 | -1.7422638027 |
| H | 4.1362133289  | -2.2218583939 | -1.7422638027 |

TS endo 0554

E(RB3LYP) = -706.410153698 A.U.

First frequency = -538.3312  $\text{cm}^{-1}$



|   |               |               |               |
|---|---------------|---------------|---------------|
| H | -1.0539889303 | 0.1596220169  | -2.1793482834 |
| C | -0.7096117155 | -0.4520043063 | -1.3536254436 |
| H | 0.1252564207  | -1.0925541549 | -1.6093811819 |
| C | -1.5690226017 | -0.8001573906 | -0.3163092257 |
| C | -1.0219019202 | -1.505349109  | 0.7793411754  |
| C | 0.2861795019  | -1.9629282683 | 0.8049320566  |
| H | 0.6668607196  | -2.4159930389 | 1.7155696411  |
| H | 0.7423183871  | -2.3390545629 | -0.1037575969 |
| C | 1.6504425949  | -0.2181542191 | 0.4384838762  |
| H | 1.7030155225  | -0.0906680664 | 1.5175621618  |
| C | 2.8357567827  | -0.9105395862 | -0.2085222096 |
| C | 0.9251154343  | 0.7355151706  | -0.276466367  |
| H | 1.2750726527  | 0.9941044257  | -1.2744032326 |
| C | 0.1709680393  | 1.8065835663  | 0.4737590837  |
| C | -3.0477901388 | -0.3577150167 | -0.2572306175 |
| H | -1.5964747562 | -1.5521439804 | 1.7018657708  |
| C | -3.9094543461 | -1.6353307466 | -0.103064703  |
| C | -3.5020597356 | 0.3579460639  | -1.5426909786 |
| C | -3.3266475136 | 0.5779059038  | 0.939636031   |
| H | -2.7931997327 | 1.5247434369  | 0.8285255931  |
| H | -3.0234396507 | 0.1294964369  | 1.8898818921  |
| H | -4.3974724866 | 0.8021865629  | 1.0053803261  |
| H | -3.3526970253 | -0.2705120148 | -2.4262706164 |
| H | -2.9688215014 | 1.3002216421  | -1.7000329566 |
| H | -4.5690526877 | 0.5952131433  | -1.4765826236 |
| H | -3.7382444901 | -2.322340174  | -0.9380801538 |
| H | -4.9748144198 | -1.3779225691 | -0.083359218  |
| H | -3.6762731275 | -2.1709001855 | 0.8216107117  |
| H | 0.8731160401  | 2.3076170829  | 1.1549914942  |
| H | -0.5730423864 | 1.3240024248  | 1.1233017253  |
| C | -0.4993850031 | 2.8528329731  | -0.4211115792 |
| H | 0.2551998032  | 3.2828718949  | -1.0956031558 |
| C | -1.1951449146 | 3.9929153199  | 0.3384619144  |
| H | -1.2275986694 | 2.3487904267  | -1.0650148818 |
| H | -1.9278954008 | 3.5718009517  | 1.0397985367  |
| H | -1.771977525  | 4.591698849   | -0.3778265489 |
| C | -0.2371704202 | 4.9158247863  | 1.1010227173  |
| H | -0.7770483431 | 5.7423687086  | 1.5745062164  |

|   |              |               |               |
|---|--------------|---------------|---------------|
| H | 0.5099784735 | 5.348351803   | 0.4252964938  |
| H | 0.3016488931 | 4.3816914858  | 1.89004376    |
| C | 3.5807250945 | -1.8944701073 | 0.7030181677  |
| H | 3.5526623943 | -0.1465368561 | -0.5463114521 |
| H | 2.5034778337 | -1.41869952   | -1.1254861865 |
| H | 3.8423064177 | -1.374077121  | 1.6342817669  |
| C | 4.8572196344 | -2.479174798  | 0.0798742886  |
| H | 2.9151050105 | -2.717470085  | 0.9900316227  |
| C | 4.6025667396 | -3.3650757806 | -1.1453506183 |
| H | 5.3840374857 | -3.0668293917 | 0.8422863408  |
| H | 5.534919524  | -1.6592428265 | -0.1951939691 |
| H | 4.1640335751 | -2.7987436026 | -1.9732055447 |
| H | 3.9125711861 | -4.1814375401 | -0.9012238706 |
| H | 5.5324435704 | -3.8125949812 | -1.5109543501 |
| H | 5.5324435704 | -3.8125949812 | -1.5109543501 |

TS endo 0555

E(RB3LYP) = -706.407852761 A.U.

First frequency = -535.0412  $\text{cm}^{-1}$

|   |               |               |               |
|---|---------------|---------------|---------------|
| H | -1.3740903668 | -0.6763574046 | -2.081291658  |
| C | -1.060281723  | -1.0395174962 | -1.1094333557 |
| H | -0.1847056039 | -1.6740787131 | -1.1459647927 |
| C | -1.9742818286 | -1.1781261511 | -0.0676291703 |
| C | -1.4670536931 | -1.540554934  | 1.1983910185  |
| C | -0.1193203003 | -1.7684565315 | 1.4252322294  |
| H | 0.231982487   | -1.919363606  | 2.4425454484  |
| H | 0.4872788979  | -2.2568199229 | 0.6715508898  |
| C | 0.9629241504  | 0.0702549644  | 0.7754492235  |
| H | 0.6746073651  | 0.5468547276  | 1.7092033898  |
| C | 2.381220461   | -0.4800854547 | 0.7868375386  |
| C | 0.3338561544  | 0.5607256035  | -0.3774810912 |
| H | 0.8641359471  | 0.4730976354  | -1.322597593  |
| C | -0.604843216  | 1.7454933014  | -0.2798838279 |
| C | -3.4655015571 | -0.8019502937 | -0.1988754465 |
| H | -2.1162372379 | -1.4360558458 | 2.0646266392  |
| C | -3.8632126274 | 0.33068909    | 0.7753038351  |
| C | -4.2965389002 | -2.064213901  | 0.1362693631  |

|   |               |               |               |
|---|---------------|---------------|---------------|
| C | -3.8349376789 | -0.3532195579 | -1.6242530508 |
| H | -3.301594903  | 0.5574629907  | -1.916101098  |
| H | -4.9070118334 | -0.1372490603 | -1.6789441238 |
| H | -3.6129372486 | -1.1301372594 | -2.3626866309 |
| H | -4.0497872604 | -2.8843060883 | -0.545798435  |
| H | -5.3686353752 | -1.8536399207 | 0.0464909149  |
| H | -4.1058789311 | -2.4105797426 | 1.1563667723  |
| H | -4.9374775245 | 0.53448147    | 0.6996903669  |
| H | -3.3275680897 | 1.2548648003  | 0.543548358   |
| H | -3.6503866576 | 0.0712675263  | 1.8159602185  |
| H | -1.0783932387 | 1.7323191051  | 0.7095789628  |
| H | -1.4169645299 | 1.6563764042  | -1.0095047901 |
| C | 0.0613207372  | 3.1240669825  | -0.4984037919 |
| H | 0.3947430034  | 3.1983518204  | -1.5429298387 |
| C | 1.244627414   | 3.4612230354  | 0.43299314    |
| H | -0.7247549655 | 3.8812688725  | -0.3827974228 |
| H | 1.1098098833  | 2.9502761426  | 1.3945636126  |
| H | 1.233518949   | 4.5348068188  | 0.6583025223  |
| C | 2.6145441052  | 3.1038113547  | -0.1566668207 |
| H | 2.8130734963  | 3.6958893819  | -1.0575010817 |
| H | 2.6644784045  | 2.0497819131  | -0.4405535302 |
| H | 3.4233530539  | 3.3002946327  | 0.5554969032  |
| C | 2.858053088   | -1.1440656304 | -0.5118079748 |
| H | 2.4975137218  | -1.1969300124 | 1.6107713239  |
| H | 3.0568328165  | 0.3517879196  | 1.0302501532  |
| H | 2.1416873182  | -1.9197859439 | -0.8115141378 |
| C | 4.2562173541  | -1.7727336518 | -0.4064959894 |
| H | 2.8638297392  | -0.4064325794 | -1.325191404  |
| C | 5.3780478046  | -0.7584418122 | -0.154089754  |
| H | 4.4679824611  | -2.3158259264 | -1.3361637883 |
| H | 4.2551080594  | -2.5257614286 | 0.3933964537  |
| H | 5.3829003007  | 0.0195487494  | -0.9265917537 |
| H | 6.3591940258  | -1.2440448939 | -0.1629762822 |
| H | 5.2669725314  | -0.2605321801 | 0.8142250564  |
| H | 5.2669725314  | -0.2605321801 | 0.8142250564  |

TS endo 0556

E(RB3LYP) = -706.409476977 A.U.

First frequency =  $-506.9404 \text{ cm}^{-1}$

|   |               |               |               |
|---|---------------|---------------|---------------|
| H | -1.6082743834 | 0.0456585578  | -2.0634757177 |
| C | -1.1774887012 | -0.5723840683 | -1.2809643363 |
| H | -0.33679568   | -1.1685344301 | -1.6140198168 |
| C | -1.9611424261 | -0.9894636978 | -0.2082967429 |
| C | -1.3216837651 | -1.7011315654 | 0.83260322    |
| C | 0.0053654168  | -2.0884413573 | 0.7785216245  |
| H | 0.4601135133  | -2.5376867717 | 1.6560621311  |
| H | 0.4602099159  | -2.3755716939 | -0.161807228  |
| C | 1.2463996462  | -0.1788392497 | 0.3867623463  |
| H | 1.2989773093  | -0.0893498124 | 1.4687899222  |
| C | 2.4622887457  | -0.7697758306 | -0.2998605448 |
| C | 0.4063928664  | 0.6984462894  | -0.2943964263 |
| H | 0.6997983456  | 0.9851796688  | -1.3024041073 |
| C | -0.4147417712 | 1.7019386879  | 0.4794814653  |
| C | -3.4554687645 | -0.6053790706 | -0.1318506833 |
| H | -1.8332867757 | -1.8047454805 | 1.7840152165  |
| C | -4.0814136471 | -0.9252362055 | 1.2388744354  |
| C | -4.1950772623 | -1.4412010061 | -1.2060558977 |
| C | -3.6985583081 | 0.8920504651  | -0.4184445624 |
| H | -4.7748892083 | 1.0931185381  | -0.45885531   |
| H | -3.2724360195 | 1.2076671852  | -1.3746163219 |
| H | -3.2689789805 | 1.5187623621  | 0.3668358785  |
| H | -4.0466705368 | -2.5124843735 | -1.0353721649 |
| H | -3.8233017835 | -1.208139282  | -2.2085874326 |
| H | -5.2720617751 | -1.236329844  | -1.1844581712 |
| H | -4.0221489751 | -1.9920756136 | 1.475798758   |
| H | -5.1406995601 | -0.648264484  | 1.2346859882  |
| H | -3.5953055271 | -0.366400436  | 2.0455375373  |
| H | -0.9916353776 | 1.1645415494  | 1.2435227891  |
| H | -1.1447357713 | 2.1742725385  | -0.1833615166 |
| C | 0.4327830819  | 2.7903274133  | 1.1722604315  |
| H | -0.2439893846 | 3.4784809565  | 1.6982594958  |
| C | 1.3372075389  | 3.5960763635  | 0.2266597887  |
| H | 1.0572683412  | 2.3191870575  | 1.9416422973  |
| H | 2.0755384481  | 2.9212368391  | -0.225269038  |
| H | 1.9091475955  | 4.3208044631  | 0.8199111174  |

|   |               |               |               |
|---|---------------|---------------|---------------|
| C | 0.5790268956  | 4.3361902637  | -0.880600355  |
| H | 0.0779366896  | 3.6400878336  | -1.5615743104 |
| H | 1.2555048187  | 4.9530701901  | -1.4810877582 |
| H | -0.1895080925 | 4.9952077715  | -0.4597354094 |
| C | 3.3281459423  | -1.6611854285 | 0.5984738883  |
| H | 3.0769586594  | 0.0540229777  | -0.6878658774 |
| H | 2.1497263945  | -1.3392893683 | -1.1898381206 |
| H | 3.658989951   | -1.0736581232 | 1.4669504374  |
| C | 4.5552765264  | -2.2624910328 | -0.1035779835 |
| H | 2.7148918196  | -2.4762197926 | 0.9984732945  |
| C | 5.5932853134  | -1.2291098828 | -0.556901209  |
| H | 4.2215020638  | -2.8508850908 | -0.9695235506 |
| H | 5.0361094737  | -2.9742914887 | 0.5793037466  |
| H | 6.474209784   | -1.7164744793 | -0.9871944632 |
| H | 5.9298926284  | -0.616355338  | 0.2876074043  |
| H | 5.1904733265  | -0.5515231494 | -1.316381615  |
| H | 5.1904733265  | -0.5515231494 | -1.316381615  |

TS endo 0557

E(RB3LYP) = -706.409131198 A.U.

First frequency = -516.8444  $\text{cm}^{-1}$

|   |               |               |               |
|---|---------------|---------------|---------------|
| H | -1.3558787201 | -0.3769156662 | -2.0154771308 |
| C | -1.1240617706 | -0.9628435461 | -1.1308069655 |
| H | -0.3940339565 | -1.7421538721 | -1.3049743697 |
| C | -2.0572305612 | -1.0798776181 | -0.1028765553 |
| C | -1.6559101057 | -1.7510576819 | 1.0728085198  |
| C | -0.4167510965 | -2.3619756439 | 1.1910960056  |
| H | -0.112759779  | -2.772657938  | 2.1501953324  |
| H | 0.020364704   | -2.8636937252 | 0.3358070126  |
| C | 1.1614231286  | -0.8306347293 | 0.8010093081  |
| H | 1.112634066   | -0.5615744565 | 1.8549142562  |
| C | 2.302885179   | -1.7551378661 | 0.4255167004  |
| C | 0.6288974066  | 0.0924618276  | -0.104394012  |
| H | 1.0733271094  | 0.1455691844  | -1.0941447291 |
| C | -0.0623863845 | 1.3314510209  | 0.4183929101  |
| C | -3.4494619617 | -0.420880822  | -0.2262929368 |
| H | -2.2486795487 | -1.6331361434 | 1.9738590408  |

|   |               |               |               |
|---|---------------|---------------|---------------|
| C | -3.3741892769 | 1.0459005958  | -0.7010840893 |
| C | -4.2351500543 | -0.4422194007 | 1.098482691   |
| C | -4.2466321759 | -1.2390624653 | -1.2724588211 |
| H | -3.7560995854 | -1.2087714857 | -2.2502097249 |
| H | -5.2616305969 | -0.8401441071 | -1.3862827704 |
| H | -4.322904577  | -2.2883736022 | -0.9693026895 |
| H | -4.4021005705 | -1.4625248524 | 1.4574611144  |
| H | -5.2172479586 | 0.0194410691  | 0.9529026347  |
| H | -3.717925614  | 0.1183821395  | 1.8842912104  |
| H | -4.3843767347 | 1.4327927108  | -0.8753121272 |
| H | -2.8192101099 | 1.1526315382  | -1.6371866973 |
| H | -2.8970732385 | 1.6797312282  | 0.0504899619  |
| H | -0.7473024181 | 1.0045464919  | 1.211077909   |
| H | -0.689580254  | 1.768561516   | -0.363872225  |
| C | 0.8717245522  | 2.4374917842  | 0.9767749052  |
| H | 0.3734551871  | 2.9268003742  | 1.8235255574  |
| C | 1.2357743191  | 3.5288947607  | -0.0440258662 |
| H | 1.7825096974  | 1.9820050273  | 1.3841050423  |
| H | 1.8619397512  | 4.2819593566  | 0.4520417732  |
| H | 0.3132839685  | 4.0484832189  | -0.3383607464 |
| C | 1.9498255324  | 3.0347758455  | -1.3064106762 |
| H | 1.3322535975  | 2.324653323   | -1.8656286288 |
| H | 2.8916838989  | 2.5337870746  | -1.0642118834 |
| H | 2.179490233   | 3.8688126326  | -1.9779645131 |
| C | 3.7031643277  | -1.2051178586 | 0.7730074208  |
| H | 2.2457542788  | -1.98381941   | -0.6468643477 |
| H | 2.1984356216  | -2.7165478836 | 0.9432429094  |
| H | 3.7392451369  | -1.0139372144 | 1.8540665505  |
| C | 4.1267035904  | 0.0681949902  | 0.02901345    |
| H | 4.4412708838  | -1.9956994586 | 0.5777749057  |
| C | 4.2419249099  | -0.1008264777 | -1.4891196819 |
| H | 5.094261292   | 0.3990974902  | 0.4274995466  |
| H | 3.412922816   | 0.8670981954  | 0.2537742947  |
| H | 4.9390613001  | -0.9075895877 | -1.7442132126 |
| H | 4.6048952263  | 0.81676882    | -1.9634269565 |
| H | 3.2767329148  | -0.3424203244 | -1.9452284492 |
| H | 3.2767329148  | -0.3424203244 | -1.9452284492 |

TS endo 0561

E(RB3LYP) = -706.408681568 A.U.

First frequency = -514.7460 cm<sup>-1</sup>

|   |               |               |               |
|---|---------------|---------------|---------------|
| H | -1.9165050314 | -0.439967618  | -2.2223648015 |
| C | -1.3258876815 | -0.9326789507 | -1.4585664643 |
| H | -0.673209134  | -1.7050070492 | -1.848501707  |
| C | -1.777666235  | -1.0028542776 | -0.1433094501 |
| C | -0.9037398185 | -1.5646983682 | 0.8152063699  |
| C | 0.3304660291  | -2.0979316794 | 0.4933590846  |
| H | 0.9968102648  | -2.4159325899 | 1.2884603305  |
| H | 0.4839699744  | -2.6050229709 | -0.4515100446 |
| C | 1.4701529065  | -0.4299484388 | -0.6395033615 |
| H | 1.7904728093  | -0.0590055795 | 0.3281133224  |
| C | 2.4710979253  | -1.2555355759 | -1.4228717582 |
| C | 0.4998695535  | 0.3175038512  | -1.3080769842 |
| H | 0.5338141982  | 0.3172966571  | -2.397230029  |
| C | -0.0359877601 | 1.5712770587  | -0.6592639072 |
| C | -3.1091904663 | -0.3777903153 | 0.3245561468  |
| H | -1.1315691774 | -1.4183856971 | 1.8686548074  |
| C | -3.9778971294 | -1.5235292851 | 0.8993698734  |
| C | -3.8863615821 | 0.2800801259  | -0.8298428813 |
| C | -2.9059218722 | 0.6895518463  | 1.424847579   |
| H | -3.8768882079 | 1.0391404347  | 1.7936366297  |
| H | -2.3640768655 | 1.5559314273  | 1.0370934339  |
| H | -2.3503618524 | 0.3001489404  | 2.2822742453  |
| H | -3.3275384413 | 1.1113276178  | -1.2724932967 |
| H | -4.8345211454 | 0.6815880616  | -0.4573824915 |
| H | -4.1176857091 | -0.4376228295 | -1.6232001226 |
| H | -4.9498936564 | -1.1406143327 | 1.2317348133  |
| H | -3.4924339356 | -2.0013058501 | 1.7556757691  |
| H | -4.1533266588 | -2.2949199153 | 0.1425630673  |
| H | -0.2598858757 | 1.3380651045  | 0.3871254628  |
| H | -0.9840634012 | 1.8720349433  | -1.1221816178 |
| C | 0.9510247326  | 2.7510160986  | -0.7276812633 |
| H | 1.8866569639  | 2.4649601974  | -0.2281509392 |
| C | 0.4123432484  | 4.0484574524  | -0.1051677869 |
| H | 1.2114538283  | 2.9353661542  | -1.7785555561 |

|   |               |               |               |
|---|---------------|---------------|---------------|
| H | -0.5200653563 | 4.3323363322  | -0.6126315433 |
| H | 1.1255422849  | 4.8587102007  | -0.3036911389 |
| C | 0.1648954882  | 3.9595640045  | 1.4054395886  |
| H | -0.1503862572 | 4.9257174485  | 1.8127570408  |
| H | 1.0764615113  | 3.6558469492  | 1.9336228402  |
| H | -0.614826474  | 3.2310554799  | 1.6494382014  |
| C | 3.4396656909  | -2.1483233858 | -0.6276528014 |
| H | 3.0804053699  | -0.5667290623 | -2.0286649922 |
| H | 1.9289003632  | -1.8750388921 | -2.1531128216 |
| H | 2.8900200326  | -2.9452805593 | -0.1135904452 |
| C | 4.3343218535  | -1.4033544072 | 0.3899814871  |
| H | 4.0804853919  | -2.6542829059 | -1.3600389068 |
| C | 3.7956165961  | -1.382327384  | 1.8267623658  |
| H | 4.5014083493  | -0.3747850335 | 0.0425564627  |
| H | 5.3239576011  | -1.8760239504 | 0.4073711866  |
| H | 3.6664770886  | -2.4029141434 | 2.2055157859  |
| H | 2.8250557986  | -0.8845804486 | 1.8997251719  |
| H | 4.4865819555  | -0.8638489829 | 2.5000349081  |
| H | 4.4865819555  | -0.8638489829 | 2.5000349081  |

TS endo 0564

E(RB3LYP) = -706.408425776 A.U.

First frequency = -538.3791  $\text{cm}^{-1}$

|   |               |               |               |
|---|---------------|---------------|---------------|
| H | -1.8818475958 | -0.38836174   | -2.2228430066 |
| C | -1.4010582105 | -0.8852587846 | -1.3875640615 |
| H | -0.6352172514 | -1.5900854787 | -1.6927868537 |
| C | -2.0950978972 | -1.0899748981 | -0.1929196039 |
| C | -1.377648902  | -1.6488414682 | 0.8854178217  |
| C | -0.0612496857 | -2.0653084927 | 0.7815747733  |
| H | 0.4669330382  | -2.3748440518 | 1.6786766989  |
| H | 0.3004680901  | -2.5230196085 | -0.1306382235 |
| C | 1.1223107743  | -0.2862754796 | -0.0810504813 |
| H | 1.2857192893  | -0.0025611661 | 0.9534853624  |
| C | 2.2440175232  | -1.0377353293 | -0.7731574161 |
| C | 0.2141148871  | 0.47567414    | -0.8245350768 |
| H | 0.4285961411  | 0.5963952292  | -1.8863813872 |
| C | -0.5308691966 | 1.622474565   | -0.1768469688 |



|   |               |               |               |
|---|---------------|---------------|---------------|
| C | -3.5435941784 | -0.607277812  | 0.0341445829  |
| H | -1.8136157759 | -1.5911118305 | 1.8801430004  |
| C | -4.1324846691 | 0.0926280216  | -1.2041139675 |
| C | -3.6586869677 | 0.3664723936  | 1.229730839   |
| C | -4.4035146609 | -1.8602979749 | 0.3317487768  |
| H | -5.4516585313 | -1.5800880045 | 0.4893949091  |
| H | -4.0532693453 | -2.3790661017 | 1.2291933425  |
| H | -4.3592621554 | -2.5689642502 | -0.5015987526 |
| H | -3.282602826  | -0.0729879343 | 2.1575095531  |
| H | -4.7083314691 | 0.6338662852  | 1.3963698795  |
| H | -3.1018505742 | 1.2885040791  | 1.0451319108  |
| H | -3.5765987029 | 0.9999335729  | -1.4628938718 |
| H | -5.1682976402 | 0.3869169573  | -1.0057189691 |
| H | -4.1360433531 | -0.5660905687 | -2.0782495678 |
| H | -0.7663559373 | 1.3369856439  | 0.8560262829  |
| H | -1.4927932672 | 1.766686684   | -0.6806794394 |
| C | 0.1912225084  | 2.9888565203  | -0.1663025265 |
| H | 0.3561092564  | 3.3186151837  | -1.2016070073 |
| C | 1.5253884794  | 3.0547443159  | 0.6054551522  |
| H | -0.5118346963 | 3.7115799164  | 0.2675150949  |
| H | 1.4975372831  | 2.3458572332  | 1.4430902566  |
| H | 1.6290421157  | 4.048495483   | 1.0587264382  |
| C | 2.7595904905  | 2.786292868   | -0.2621567089 |
| H | 2.685469541   | 1.8206844133  | -0.7659437235 |
| H | 3.6784568275  | 2.7838066702  | 0.3335232874  |
| H | 2.863600453   | 3.5565626811  | -1.0349895772 |
| C | 3.2527196077  | -1.6977285757 | 0.1813495833  |
| H | 2.7801552694  | -0.3573971121 | -1.4497500062 |
| H | 1.8153719094  | -1.8050273085 | -1.4357196846 |
| H | 2.7063735288  | -2.3204142805 | 0.8988372968  |
| C | 4.1476212206  | -0.7066745269 | 0.9471650123  |
| H | 3.8950058159  | -2.3808409476 | -0.389899308  |
| C | 5.2075619449  | -0.0286338236 | 0.0719755866  |
| H | 4.6501100699  | -1.2424907147 | 1.7622372678  |
| H | 3.5258574902  | 0.0596124694  | 1.4278842441  |
| H | 5.8711836455  | -0.7725128476 | -0.3839445197 |
| H | 5.8274029534  | 0.6563909881  | 0.659800718   |
| H | 4.7566396757  | 0.553735989   | -0.7368305333 |

H 4.7566396757 0.553735989 -0.7368305333

TS endo 0566

E(RB3LYP) = -706.409453117 A.U.

First frequency = -523.4622 cm<sup>-1</sup>

H -0.5615275651 -0.1404386368 -2.0871384922  
C -0.4476630767 -0.7671121019 -1.2104056255  
H 0.3530238909 -1.4891620366 -1.2923751604  
C -1.5262419803 -1.0339612736 -0.3724454428  
C -1.26511597 -1.7604606413 0.8109117775  
C 0.0005965138 -2.2056466501 1.1534631723  
H 0.1630531941 -2.6496793837 2.1319773823  
H 0.6965152497 -2.5386630575 0.3939532743  
C 1.3096685263 -0.3776074002 1.2012814028  
H 0.8229028088 -0.0990461836 2.1336712112  
C 2.6812634193 -1.0066823374 1.4227274632  
C 0.9634315807 0.4049056587 0.0940634238  
H 1.6733754186 0.4674536682 -0.7278894212  
C 0.1064209623 1.6344220164 0.3039521382  
C -2.939687547 -0.4603396515 -0.6096913265  
H -2.0382834939 -1.798297578 1.5747302139  
C -3.8988992762 -1.6619917832 -0.7915224492  
C -3.0143725543 0.4099807233 -1.8771418731  
C -3.4350450999 0.3943624636 0.5795426422  
H -3.4191593869 -0.1592600197 1.5221045394  
H -4.4676057282 0.7179541829 0.4057853987  
H -2.8208200991 1.2902154847 0.7047380032  
H -2.7301160182 -0.1519853281 -2.7723013283  
H -2.3644714801 1.2882192054 -1.8035151122  
H -4.0388617155 0.7686531437 -2.0210070802  
H -3.5866915793 -2.2834904427 -1.6369934304  
H -4.9212979177 -1.3139132272 -0.9796756387  
H -3.9167506369 -2.296451293 0.0997820726  
H -0.7170291162 1.3734470153 0.9797393219  
H -0.350669405 1.9465684839 -0.6403449853  
C 0.8913631485 2.8112699872 0.9114993432  
H 1.3816913046 2.4678296444 1.8313234049

|   |               |               |               |
|---|---------------|---------------|---------------|
| C | 0.0239920976  | 4.0399335586  | 1.2277141646  |
| H | 1.6996778226  | 3.1008302371  | 0.2247195812  |
| H | 0.6419538516  | 4.7845106923  | 1.7457560281  |
| H | -0.762675659  | 3.7493521757  | 1.9378744199  |
| C | -0.6175480839 | 4.6915727367  | -0.0030751153 |
| H | 0.1435778465  | 4.9649483074  | -0.7434232049 |
| H | -1.1603409239 | 5.6026900263  | 0.2690773675  |
| H | -1.3296818488 | 4.0205978656  | -0.4941120573 |
| C | 3.6294134667  | -1.1370381203 | 0.2213029984  |
| H | 2.5788708847  | -1.9929948301 | 1.8957358642  |
| H | 3.1872416099  | -0.3823929625 | 2.1742205287  |
| H | 3.7687256775  | -0.1546954639 | -0.2491548006 |
| C | 3.2137601495  | -2.1573861696 | -0.8443014881 |
| H | 4.6168492263  | -1.4249021148 | 0.6068230469  |
| C | 4.2617149599  | -2.3162301461 | -1.9497590394 |
| H | 2.2618846364  | -1.8567081406 | -1.294773643  |
| H | 3.0330085863  | -3.1285640928 | -0.3639423211 |
| H | 5.2203037966  | -2.653315267  | -1.5390055158 |
| H | 4.4397676113  | -1.3633613836 | -2.4613578295 |
| H | 3.9455756102  | -3.0450985062 | -2.7029258665 |
| H | 3.9455756102  | -3.0450985062 | -2.7029258665 |

TS endo 0574

E(RB3LYP) = -706.409353500 A.U.

First frequency = -522.1185  $\text{cm}^{-1}$

|   |               |               |               |
|---|---------------|---------------|---------------|
| H | -0.8235885372 | -0.3497518191 | -2.1860924143 |
| C | -0.5622459108 | -0.884608171  | -1.2806196871 |
| H | 0.2871945513  | -1.5442429644 | -1.3951475951 |
| C | -1.5189235737 | -1.1617277112 | -0.3084895448 |
| C | -1.0720109122 | -1.7565328489 | 0.8928505907  |
| C | 0.2566106102  | -2.0672729479 | 1.1248119554  |
| H | 0.5628826353  | -2.4102397242 | 2.1094320561  |
| H | 0.8933359849  | -2.4044063279 | 0.3177171137  |
| C | 1.3980713237  | -0.1411489336 | 0.8779655864  |
| H | 0.9849481597  | 0.1810585957  | 1.8315924105  |
| C | 2.8365142064  | -0.6346915764 | 1.0008772499  |
| C | 0.871456748   | 0.5053439655  | -0.2458658634 |

|   |               |               |               |
|---|---------------|---------------|---------------|
| H | 1.4836803692  | 0.5440900568  | -1.1440710944 |
| C | -0.0556871063 | 1.6844552738  | -0.046163877  |
| C | -2.9950887221 | -0.7271703658 | -0.4303827583 |
| H | -1.754782199  | -1.7889782664 | 1.7385637594  |
| C | -3.8572329754 | -2.0129510837 | -0.4042183771 |
| C | -3.2806936231 | 0.0157592325  | -1.7478264933 |
| C | -3.4355123928 | 0.1892043467  | 0.7343026386  |
| H | -4.5044939214 | 0.4159849614  | 0.6509681975  |
| H | -2.8906248375 | 1.1369835819  | 0.718410444   |
| H | -3.2742730222 | -0.275899871  | 1.7105005329  |
| H | -4.3427720883 | 0.2760910732  | -1.8041584011 |
| H | -3.0429260046 | -0.600813616  | -2.620328227  |
| H | -2.7083734403 | 0.9464398274  | -1.819444844  |
| H | -3.5827371334 | -2.6814145837 | -1.2266426046 |
| H | -4.9206965191 | -1.7655272516 | -0.5026733887 |
| H | -3.7241142329 | -2.5639838158 | 0.5317063893  |
| H | -0.7874228878 | 1.4264383014  | 0.7285336319  |
| H | -0.6271728101 | 1.8896777387  | -0.9594341225 |
| C | 0.6873542747  | 2.9633103077  | 0.3769792621  |
| H | 1.2434495081  | 2.7667325349  | 1.3036888152  |
| C | -0.2494039159 | 4.1590765524  | 0.5820636638  |
| H | 1.4423634325  | 3.2151967431  | -0.3813869228 |
| H | -1.0039090887 | 3.8992018029  | 1.3373922749  |
| H | -0.8041966181 | 4.3474862597  | -0.3473129531 |
| C | 0.4876341008  | 5.4319836155  | 1.0079145226  |
| H | 1.0245335287  | 5.2788670353  | 1.9511026536  |
| H | -0.2025575674 | 6.2702504258  | 1.1490667482  |
| H | 1.2255102733  | 5.7301373143  | 0.2542636444  |
| C | 3.6685074586  | -0.7787448937 | -0.2844499305 |
| H | 2.8732358141  | -1.5741691853 | 1.5666984399  |
| H | 3.3552954359  | 0.0957553546  | 1.6394801182  |
| H | 3.6416148165  | 0.1705232255  | -0.8333992185 |
| C | 3.2773587823  | -1.9237742533 | -1.2320707909 |
| H | 4.7163878156  | -0.923269195  | 0.0115917655  |
| C | 3.5045236697  | -3.3230541358 | -0.6490583011 |
| H | 3.864320335   | -1.8258566757 | -2.1542315266 |
| H | 2.2301347533  | -1.815037343  | -1.535620105  |
| H | 3.2461902571  | -4.1007114469 | -1.3750634583 |

|   |              |               |               |
|---|--------------|---------------|---------------|
| H | 2.9010986718 | -3.4980009231 | 0.2470000718  |
| H | 4.5551201445 | -3.4622596529 | -0.3689758898 |
| H | 4.5551201445 | -3.4622596529 | -0.3689758898 |

TS endo 0575

E(RB3LYP) = -706.408057261 A.U.

First frequency = -529.6153 cm<sup>-1</sup>

|   |               |               |               |
|---|---------------|---------------|---------------|
| H | -1.2357428137 | -1.245958226  | -1.9300018005 |
| C | -1.0189342863 | -1.3885139724 | -0.8776761548 |
| H | -0.2556946288 | -2.1324866374 | -0.6892090391 |
| C | -1.9809002159 | -1.1258299748 | 0.0942938957  |
| C | -1.5819222446 | -1.2233997037 | 1.4449692403  |
| C | -0.2944943218 | -1.5694763983 | 1.8188214808  |
| H | -0.0072644556 | -1.507991667  | 2.8651327241  |
| H | 0.2683008049  | -2.2984290677 | 1.2469867556  |
| C | 1.0765672856  | -0.1015926432 | 0.8237727742  |
| H | 0.7993122187  | 0.6385237992  | 1.5700737927  |
| C | 2.4024924602  | -0.7917097743 | 1.1228266435  |
| C | 0.5805748012  | 0.1230206944  | -0.4671084878 |
| H | 1.1356685778  | -0.2937162585 | -1.3029551058 |
| C | -0.1539024881 | 1.4084706034  | -0.7853209689 |
| C | -3.3883477538 | -0.5858269551 | -0.2361750022 |
| H | -2.2395164312 | -0.8160571827 | 2.209425805   |
| C | -3.6355471911 | 0.8044459169  | 0.393038879   |
| C | -4.419636417  | -1.5861208955 | 0.3400811687  |
| C | -3.6315834777 | -0.4698053235 | -1.7516807728 |
| H | -2.9503781751 | 0.2488569419  | -2.2190460874 |
| H | -4.6532661623 | -0.1227266383 | -1.9379154676 |
| H | -3.5096494254 | -1.433869135  | -2.2555590991 |
| H | -4.32287801   | -1.6815090185 | 1.4256559384  |
| H | -4.2814536073 | -2.580954477  | -0.0956073546 |
| H | -5.4410482785 | -1.2539411997 | 0.1207057919  |
| H | -2.9587893625 | 1.5520517215  | -0.0288550373 |
| H | -3.4940219922 | 0.7963407316  | 1.4772098978  |
| H | -4.6632391988 | 1.1310804962  | 0.1969336629  |
| H | -0.7551337961 | 1.7027891227  | 0.0818158773  |
| H | -0.8599260502 | 1.2538141738  | -1.6084601726 |

|   |              |               |               |
|---|--------------|---------------|---------------|
| C | 0.7939531967 | 2.5608903019  | -1.1898891119 |
| H | 1.3693131167 | 2.2402728119  | -2.0692583525 |
| C | 1.7701594592 | 3.0436134935  | -0.1063470686 |
| H | 0.1819235236 | 3.4121227939  | -1.5203545716 |
| H | 2.4514698946 | 3.7774143822  | -0.5556832209 |
| H | 2.3970277198 | 2.2052740152  | 0.2201088736  |
| C | 1.0861811086 | 3.6788402242  | 1.1088690781  |
| H | 0.4468660248 | 2.9640400062  | 1.636484599   |
| H | 0.4545054184 | 4.5226059818  | 0.8070845017  |
| H | 1.8224577442 | 4.0532918205  | 1.8275876116  |
| C | 2.9499227325 | -1.7346300216 | 0.0322370724  |
| H | 2.3230467795 | -1.3421476365 | 2.0676131642  |
| H | 3.147048749  | -0.0065756468 | 1.3206809597  |
| H | 3.5682389501 | -2.5076375774 | 0.5062212905  |
| C | 3.7985967219 | -1.0431253321 | -1.0526452063 |
| H | 2.1163246849 | -2.2710046352 | -0.4383473118 |
| C | 5.1788082511 | -0.5974688158 | -0.5560691949 |
| H | 3.2611875842 | -0.1733468269 | -1.4478582801 |
| H | 3.9296097241 | -1.733449616  | -1.8956083212 |
| H | 5.1021697806 | 0.1235178993  | 0.264699625   |
| H | 5.7524548552 | -0.1202582815 | -1.3572300977 |
| H | 5.7597763567 | -1.4523712726 | -0.1911273326 |
| H | 5.7597763567 | -1.4523712726 | -0.1911273326 |

TS endo 0580

E(RB3LYP) = -706.410125248 A.U.

First frequency = -500.5750 cm<sup>-1</sup>

|   |               |               |               |
|---|---------------|---------------|---------------|
| H | -1.9359067623 | -0.8420938816 | -2.1132371673 |
| C | -1.3771589834 | -1.1846511015 | -1.2474350232 |
| H | -0.716029825  | -2.0159015207 | -1.4572197364 |
| C | -1.8729606696 | -0.9777840951 | 0.0356654361  |
| C | -1.0502598232 | -1.3490629874 | 1.1247826482  |
| C | 0.1665671184  | -1.9870710043 | 0.9660726097  |
| H | 0.7965556941  | -2.153684235  | 1.8344602841  |
| H | 0.3187400496  | -2.6920231134 | 0.1575686644  |
| C | 1.4372637816  | -0.6371127386 | -0.3871619455 |
| H | 1.7236637451  | -0.114830686  | 0.5202382043  |

|   |               |               |               |
|---|---------------|---------------|---------------|
| C | 2.4306585184  | -1.6413031904 | -0.9391887425 |
| C | 0.5574301709  | 0.0243417234  | -1.2399483736 |
| H | 0.6290986205  | -0.1946437752 | -2.3041978858 |
| C | 0.0453204628  | 1.3931761053  | -0.8664843536 |
| C | -3.2396107439 | -0.2894230061 | 0.2508101108  |
| H | -1.2903383637 | -0.971174964  | 2.1131920125  |
| C | -3.4778969205 | 0.1125015196  | 1.7188694689  |
| C | -4.3307334185 | -1.3117272276 | -0.1536986682 |
| C | -3.4098518961 | 0.9796468758  | -0.6116843379 |
| H | -4.4297341968 | 1.365905427   | -0.5063651264 |
| H | -3.2432752614 | 0.7872589713  | -1.6749691818 |
| H | -2.7193708667 | 1.7664787344  | -0.2981606781 |
| H | -4.243712743  | -2.2281702921 | 0.4390482433  |
| H | -4.2370863427 | -1.5863364337 | -1.2089263337 |
| H | -5.3325119645 | -0.8947069879 | 0.0041632785  |
| H | -3.4646154126 | -0.7536413843 | 2.3876547659  |
| H | -4.4596675848 | 0.5871479576  | 1.8169832029  |
| H | -2.7262027486 | 0.8283340371  | 2.0684693527  |
| H | -0.3727200155 | 1.3352036581  | 0.1462253301  |
| H | -0.7771471128 | 1.6827154147  | -1.5289653907 |
| C | 1.1315931661  | 2.4844371147  | -0.915397249  |
| H | 1.9330794741  | 2.2284884112  | -0.2091188022 |
| C | 0.6046123873  | 3.8939157847  | -0.6040907827 |
| H | 1.5929552529  | 2.4836126576  | -1.9118539596 |
| H | -0.1731028395 | 4.1574911984  | -1.3341975354 |
| H | 1.4177726964  | 4.6161893866  | -0.7514182615 |
| C | 0.0451303532  | 4.0517986172  | 0.8147876897  |
| H | -0.8398250157 | 3.4274214313  | 0.9751340053  |
| H | -0.2450030719 | 5.0886871568  | 1.0133210664  |
| H | 0.7917487757  | 3.764217631   | 1.5645120986  |
| C | 3.2860994462  | -2.4003141806 | 0.091069589   |
| H | 3.1062984956  | -1.1119251388 | -1.6261163427 |
| H | 1.8986644639  | -2.3692815216 | -1.5689530999 |
| H | 2.6640422188  | -3.1152552407 | 0.6407852253  |
| C | 4.0294117024  | -1.5110858943 | 1.1022353003  |
| H | 4.0229967028  | -3.0000456251 | -0.4597860782 |
| C | 4.9121453174  | -0.4360477004 | 0.4591134493  |
| H | 4.6467363944  | -2.1555770959 | 1.7406646738  |

|   |              |               |               |
|---|--------------|---------------|---------------|
| H | 3.30612968   | -1.0326392399 | 1.7747385939  |
| H | 4.3140763198 | 0.2943039471  | -0.0957183331 |
| H | 5.6277983287 | -0.8803446952 | -0.2426047354 |
| H | 5.4830331327 | 0.1118725282  | 1.2156551399  |
| H | 5.4830331327 | 0.1118725282  | 1.2156551399  |

TS endo 0594

E(RB3LYP) = -706.409383430 A.U.

First frequency = -525.8501 cm<sup>-1</sup>

|   |               |               |               |
|---|---------------|---------------|---------------|
| H | -0.8261175438 | -0.7305468036 | -2.1724565845 |
| C | -0.6221858682 | -1.0515055088 | -1.1576985213 |
| H | 0.2349336578  | -1.7055923464 | -1.0725616258 |
| C | -1.6396911536 | -1.1322812469 | -0.2112384862 |
| C | -1.2691067355 | -1.4480978987 | 1.1143774616  |
| C | 0.044680161   | -1.669426129  | 1.4914446087  |
| H | 0.2845750638  | -1.7829180353 | 2.5453318961  |
| H | 0.7384923761  | -2.1634265147 | 0.8231237245  |
| C | 1.1614968414  | 0.1860074361  | 0.9120229473  |
| H | 0.669221256   | 0.6974022295  | 1.7348743314  |
| C | 2.5896262154  | -0.2310520227 | 1.2538418512  |
| C | 0.7337174753  | 0.5606768714  | -0.3686131705 |
| H | 1.4227683655  | 0.3961240571  | -1.1952339343 |
| C | -0.1867522922 | 1.7507393086  | -0.550071127  |
| C | -3.1044803617 | -0.7498803058 | -0.5107963759 |
| H | -2.0050149728 | -1.3098363506 | 1.9031434121  |
| C | -3.9795969185 | -1.9933694635 | -0.2203746138 |
| C | -3.3166643512 | -0.3488149392 | -1.9815663506 |
| C | -3.5905991778 | 0.4198338642  | 0.375601922   |
| H | -3.4823445064 | 0.20185131    | 1.441518699   |
| H | -4.651081837  | 0.6219061997  | 0.1864921136  |
| H | -3.0316671614 | 1.3346063329  | 0.1608535689  |
| H | -2.7413258288 | 0.5445836997  | -2.2452420706 |
| H | -4.3737994033 | -0.122832795  | -2.1558636623 |
| H | -3.0307495536 | -1.1541688193 | -2.6655009609 |
| H | -5.033968993  | -1.7788204254 | -0.4302263728 |
| H | -3.9010196738 | -2.3035386716 | 0.8258833859  |
| H | -3.6711706454 | -2.8394319911 | -0.8429794744 |



|   |               |               |               |
|---|---------------|---------------|---------------|
| H | -0.9265539592 | 1.7546219183  | 0.2571636596  |
| H | -0.7528439633 | 1.6575450052  | -1.4832936043 |
| C | 0.558929539   | 3.1041720306  | -0.5882945813 |
| H | 1.2982537697  | 3.0693597513  | -1.4000840989 |
| C | 1.2640589076  | 3.5243733397  | 0.7103069509  |
| H | -0.1624173122 | 3.885694288   | -0.86666496   |
| H | 1.8276488668  | 4.4458333741  | 0.5156467265  |
| H | 2.0063552701  | 2.7661575248  | 0.9856550919  |
| C | 0.3114277477  | 3.7631737459  | 1.8867146382  |
| H | -0.2220085176 | 2.8506345605  | 2.1712499938  |
| H | -0.4427004593 | 4.5179062376  | 1.6342286881  |
| H | 0.853434504   | 4.1154485577  | 2.7704572096  |
| C | 3.5225517493  | -0.6502099339 | 0.1078959439  |
| H | 2.5865940486  | -1.0264833884 | 2.0111956444  |
| H | 3.0521572268  | 0.6335111991  | 1.7532201353  |
| H | 3.5670382635  | 0.1484810959  | -0.6443349454 |
| C | 3.1759459922  | -1.9765510146 | -0.5777278802 |
| H | 4.5384864218  | -0.7294995045 | 0.5178384339  |
| C | 4.2075785571  | -2.381656274  | -1.6346284313 |
| H | 2.1901280549  | -1.9041144824 | -1.0495028839 |
| H | 3.095418821   | -2.7658263286 | 0.1819350485  |
| H | 5.2024112378  | -2.4991446796 | -1.1899704213 |
| H | 4.2855363993  | -1.6199519079 | -2.4189218682 |
| H | 3.941771227   | -3.3288239879 | -2.1149034989 |
| H | 3.941771227   | -3.3288239879 | -2.1149034989 |

TS endo 0598

E(RB3LYP) = -706.406931922 A.U.

First frequency = -542.3846  $\text{cm}^{-1}$

|   |               |               |               |
|---|---------------|---------------|---------------|
| H | -1.6493478943 | -1.0883730921 | -2.0878900312 |
| C | -1.25932112   | -1.3046363585 | -1.0998615915 |
| H | -0.5021733205 | -2.0795545186 | -1.0946005408 |
| C | -2.0340351262 | -1.0827041922 | 0.0371891426  |
| C | -1.4188356206 | -1.2816693494 | 1.2916270163  |
| C | -0.1094630227 | -1.7164879723 | 1.4191682305  |
| H | 0.3549992492  | -1.733086985  | 2.4016628379  |
| H | 0.2898733894  | -2.4505221622 | 0.7291085664  |

|   |               |               |               |
|---|---------------|---------------|---------------|
| C | 1.1510709359  | -0.2957585364 | 0.2350392157  |
| H | 1.1915152881  | 0.3520993803  | 1.1029714378  |
| C | 2.3653853542  | -1.1818905993 | 0.045603019   |
| C | 0.4311047166  | 0.1392322759  | -0.8843717507 |
| H | 0.7888198004  | -0.2349754413 | -1.8428698533 |
| C | -0.2515569427 | 1.5018006857  | -0.9769326468 |
| C | -3.4622241442 | -0.4996539557 | -0.0166722154 |
| H | -1.9157788024 | -0.8952081693 | 2.1785329921  |
| C | -3.5714833956 | 0.8404516501  | 0.7457719923  |
| C | -4.4095765661 | -1.5290177781 | 0.6463835196  |
| C | -3.9478505838 | -0.2650669682 | -1.4585504794 |
| H | -3.9389089849 | -1.1900656177 | -2.0437166691 |
| H | -3.332908686  | 0.4748831876  | -1.9817558908 |
| H | -4.975647423  | 0.1123291246  | -1.4466925466 |
| H | -4.3676266878 | -2.4895093162 | 0.122645903   |
| H | -5.4451256995 | -1.1699120165 | 0.6230452742  |
| H | -4.138009734  | -1.7071465679 | 1.6911340997  |
| H | -2.9540919183 | 1.6119215346  | 0.2794504982  |
| H | -3.2577662386 | 0.7477635817  | 1.7890186653  |
| H | -4.6095009659 | 1.1922651847  | 0.7441032795  |
| H | -1.283092292  | 1.3773317605  | -1.3195831716 |
| H | 0.2471789024  | 2.0652675334  | -1.7780375807 |
| C | -0.2581250275 | 2.3588828962  | 0.3026891345  |
| H | -1.0501947063 | 3.1142564883  | 0.2124716723  |
| C | 1.064087862   | 3.0894957788  | 0.604132184   |
| H | -0.5453957547 | 1.7312151364  | 1.1540265396  |
| H | 1.8978525697  | 2.3786957755  | 0.5743671858  |
| H | 1.0271418238  | 3.4782112271  | 1.6298894118  |
| C | 1.3575727678  | 4.2486812442  | -0.3553501643 |
| H | 2.2931253888  | 4.7530273024  | -0.0921429094 |
| H | 0.5555078818  | 4.9954745899  | -0.3274121495 |
| H | 1.4524241228  | 3.9055596554  | -1.3909478583 |
| C | 3.6029736757  | -0.385591568  | -0.4100256122 |
| H | 2.1456919552  | -1.9540589765 | -0.7069823146 |
| H | 2.5948876462  | -1.7134313671 | 0.9758508471  |
| H | 3.3479123353  | 0.1544813533  | -1.3304303779 |
| C | 4.8540967081  | -1.2440835689 | -0.6524403231 |
| H | 3.829256873   | 0.3841608015  | 0.3417360099  |

|   |              |               |               |
|---|--------------|---------------|---------------|
| C | 5.4121142049 | -1.912900076  | 0.6092203283  |
| H | 5.6335686414 | -0.6110767285 | -1.095441824  |
| H | 4.623061668  | -2.0125011853 | -1.4032215172 |
| H | 6.3377517841 | -2.4561876835 | 0.3928904037  |
| H | 4.7044167652 | -2.6296244528 | 1.0378094685  |
| H | 5.6355772016 | -1.1669863613 | 1.3810164597  |
| H | 5.6355772016 | -1.1669863613 | 1.3810164597  |

TS endo 0600

E(RB3LYP) = -706.408748940 A.U.

First frequency = -516.0891  $\text{cm}^{-1}$

|   |               |               |               |
|---|---------------|---------------|---------------|
| H | -1.3685553904 | -0.8116400225 | -2.1157540505 |
| C | -0.9750140295 | -1.0765138052 | -1.1389061015 |
| H | -0.0617750738 | -1.6531863925 | -1.1778971534 |
| C | -1.8224724831 | -1.1646795355 | -0.0384516681 |
| C | -1.235756147  | -1.3955001918 | 1.2256885062  |
| C | 0.1253482886  | -1.589021313  | 1.3949304364  |
| H | 0.533109036   | -1.6463008055 | 2.4004969223  |
| H | 0.699766279   | -2.1295535578 | 0.6520208985  |
| C | 1.1513528417  | 0.2179539065  | 0.5691365981  |
| H | 0.8993387165  | 0.736890538   | 1.4900866482  |
| C | 2.5740111443  | -0.3208200351 | 0.5373798302  |
| C | 0.4634396675  | 0.6335389515  | -0.572732524  |
| H | 0.9407921013  | 0.4890084965  | -1.5388777441 |
| C | -0.5051685131 | 1.7920183222  | -0.506300148  |
| C | -3.3422492854 | -0.9329753761 | -0.1962914724 |
| H | -1.8300967466 | -1.2237236719 | 2.117002228   |
| C | -4.0692149002 | -0.8178286551 | 1.1570141177  |
| C | -3.9159233625 | -2.1594242073 | -0.9482741729 |
| C | -3.6640892159 | 0.3390988996  | -1.0088471287 |
| H | -3.3372076406 | 1.2381106887  | -0.4802926013 |
| H | -4.7454249073 | 0.4154899807  | -1.1685958075 |
| H | -3.1899133409 | 0.3336880225  | -1.9940815049 |
| H | -5.0018454321 | -2.068001956  | -1.0698517831 |
| H | -3.7094156196 | -3.0838056489 | -0.3989951978 |
| H | -3.4678636189 | -2.2544452739 | -1.9421350564 |
| H | -5.1410664716 | -0.6704755517 | 0.9889018533  |

|   |               |               |               |
|---|---------------|---------------|---------------|
| H | -3.7042461371 | 0.0337884873  | 1.7408136956  |
| H | -3.9536394357 | -1.7231954205 | 1.760963939   |
| H | -1.0909905171 | 1.7151372668  | 0.4197319255  |
| H | -1.2189560757 | 1.7285731272  | -1.3320558125 |
| C | 0.1704613033  | 3.1797517079  | -0.5726455641 |
| H | 0.7503141837  | 3.251052614   | -1.5040925947 |
| C | 1.0786989776  | 3.5337681911  | 0.6099410858  |
| H | -0.619933793  | 3.9398377078  | -0.6509716587 |
| H | 1.9114685535  | 2.823117977   | 0.6599753676  |
| H | 0.5170163902  | 3.4112668658  | 1.5465326075  |
| C | 1.6294331262  | 4.960329334   | 0.522072027   |
| H | 2.2147933323  | 5.0997600761  | -0.3942402195 |
| H | 2.2800357191  | 5.1940672785  | 1.371267883   |
| H | 0.818951485   | 5.6982008438  | 0.5091993855  |
| C | 2.9700497778  | -1.1137616331 | -0.7159718533 |
| H | 2.7459992226  | -0.93559479   | 1.4282934497  |
| H | 3.2659819836  | 0.5310574909  | 0.6345285257  |
| H | 2.2610991022  | -1.9368746977 | -0.8799337503 |
| C | 4.3941740862  | -1.6897813149 | -0.6590135968 |
| H | 2.8886410441  | -0.4636368019 | -1.5950828558 |
| C | 4.5808822035  | -2.8012613569 | 0.38043811    |
| H | 5.104610228   | -0.8757220877 | -0.4596519145 |
| H | 4.6533744329  | -2.0834374972 | -1.6498700052 |
| H | 4.4189879015  | -2.4395826944 | 1.4006812661  |
| H | 5.5929356676  | -3.2165586666 | 0.3371115726  |
| H | 3.8754837202  | -3.6220445304 | 0.2052327652  |
| H | 3.8754837202  | -3.6220445304 | 0.2052327652  |

TS endo 0604

E(RB3LYP) = -706.409799685 A.U.

First frequency = -539.5640  $\text{cm}^{-1}$

|   |               |               |               |
|---|---------------|---------------|---------------|
| H | -1.1936798175 | 0.3117591829  | -2.0157323941 |
| C | -0.8306806816 | -0.3527514876 | -1.2402897777 |
| H | 0.0577627044  | -0.9034378377 | -1.5232139142 |
| C | -1.6918502065 | -0.8574589262 | -0.2713219968 |
| C | -1.1259078128 | -1.6219935928 | 0.7735754382  |
| C | 0.212850886   | -1.9838823002 | 0.8042398605  |

|   |               |               |               |
|---|---------------|---------------|---------------|
| H | 0.5973835754  | -2.4960362304 | 1.6814048551  |
| H | 0.7194935774  | -2.2433173029 | -0.1186113482 |
| C | 1.4532722064  | -0.1327708096 | 0.6617501766  |
| H | 1.4666950158  | -0.1074484047 | 1.7494341887  |
| C | 2.7073909042  | -0.667483076  | -0.0050613175 |
| C | 0.680578908   | 0.8348274676  | 0.0177778226  |
| H | 1.0398008818  | 1.2125923664  | -0.9360363485 |
| C | -0.1939062146 | 1.7422007992  | 0.8466646242  |
| C | -3.1999162471 | -0.5243409944 | -0.2222657137 |
| H | -1.7220292283 | -1.7972287424 | 1.6663956964  |
| C | -3.6719923847 | 0.2539907907  | -1.4643757647 |
| C | -3.576588922  | 0.2931635338  | 1.0339316588  |
| C | -3.972095438  | -1.8666612756 | -0.1919668741 |
| H | -3.7289679121 | -2.4541682825 | 0.6979492698  |
| H | -3.7285976955 | -2.4746811488 | -1.0692038761 |
| H | -5.0531475696 | -1.6853859024 | -0.1895370983 |
| H | -3.2591215844 | -0.2043479335 | 1.9547588043  |
| H | -4.6633068771 | 0.4259829622  | 1.0869329403  |
| H | -3.1200730695 | 1.2860063942  | 1.0120685104  |
| H | -3.2051267255 | 1.2407300695  | -1.5355573215 |
| H | -4.7547527976 | 0.4097516123  | -1.4139884401 |
| H | -3.4543659752 | -0.2935043858 | -2.3868493461 |
| H | 0.4237099086  | 2.2196653575  | 1.6207285435  |
| H | -0.9052071151 | 1.1133446964  | 1.3989941661  |
| C | -0.9515056623 | 2.8261358565  | 0.0696903257  |
| H | -1.6244966794 | 2.3443245767  | -0.6470551638 |
| C | -0.0670825166 | 3.8333832566  | -0.6852860608 |
| H | -1.5905417508 | 3.3778625201  | 0.772494804   |
| H | -0.7215179185 | 4.5410662291  | -1.2100103349 |
| H | 0.4994939896  | 3.3156736171  | -1.4699426815 |
| C | 0.9030291862  | 4.6111874972  | 0.2103078829  |
| H | 1.6482329904  | 3.9510498862  | 0.665577232   |
| H | 0.3688443452  | 5.1181785287  | 1.0224756451  |
| H | 1.4438121722  | 5.3731902104  | -0.3603399897 |
| C | 3.4948323049  | -1.6850713656 | 0.8306316998  |
| H | 3.3748418911  | 0.17707987    | -0.2351239238 |
| H | 2.4431726828  | -1.1000881626 | -0.9809300396 |
| H | 3.6862718888  | -1.2474219757 | 1.8197329478  |

|   |              |               |               |
|---|--------------|---------------|---------------|
| C | 4.8312040651 | -2.1084129202 | 0.202532874   |
| H | 2.8842059805 | -2.5791497766 | 1.005558829   |
| C | 4.6836759234 | -2.8761656062 | -1.1164089384 |
| H | 5.3756408463 | -2.733978001  | 0.9211372541  |
| H | 5.4539210059 | -1.2177883938 | 0.040494477   |
| H | 4.2316028588 | -2.2581810571 | -1.898763244  |
| H | 4.0487510963 | -3.760395327  | -0.9854651329 |
| H | 5.6558162275 | -3.2158323494 | -1.4881169848 |
| H | 5.6558162275 | -3.2158323494 | -1.4881169848 |

TS endo 0622

E(RB3LYP) = -706.409835254 A.U.

First frequency = -536.5234  $\text{cm}^{-1}$

|   |               |               |               |
|---|---------------|---------------|---------------|
| H | -0.8087363256 | 0.5972481851  | -1.7986002055 |
| C | -0.6529360866 | -0.2622491109 | -1.1577868307 |
| H | 0.1987496809  | -0.8642618989 | -1.4371769856 |
| C | -1.7000926197 | -0.8157549247 | -0.4304048166 |
| C | -1.3958607681 | -1.8602033061 | 0.4704543818  |
| C | -0.1193258936 | -2.3974329168 | 0.5921448532  |
| H | 0.0672437894  | -3.1389948892 | 1.3648078423  |
| H | 0.4849059273  | -2.5344368356 | -0.2980437248 |
| C | 1.2669956469  | -0.824427125  | 1.1267860318  |
| H | 0.996757808   | -0.9618936043 | 2.1723967485  |
| C | 2.5942609647  | -1.4748486816 | 0.7606351662  |
| C | 0.8261942835  | 0.3734575277  | 0.5547789156  |
| H | 1.4179954694  | 0.8290788806  | -0.2320341075 |
| C | -0.0473368479 | 1.2814579392  | 1.3867544422  |
| C | -3.1427076169 | -0.2623658001 | -0.4746358751 |
| H | -2.1372921765 | -2.1311033247 | 1.2186784826  |
| C | -4.0858168894 | -1.4406922915 | -0.8209330824 |
| C | -3.3271712653 | 0.8146163441  | -1.5599496597 |
| C | -3.5751560179 | 0.34036769    | 0.8808265183  |
| H | -3.4553287167 | -0.3728396393 | 1.7013612038  |
| H | -4.6310329227 | 0.632596597   | 0.8461196626  |
| H | -2.9900635073 | 1.2322895859  | 1.1202045883  |
| H | -4.3767823347 | 1.1246011455  | -1.5986986473 |
| H | -3.0517859176 | 0.4375915238  | -2.5499275123 |

|   |               |               |               |
|---|---------------|---------------|---------------|
| H | -2.7319797218 | 1.709799169   | -1.3572834035 |
| H | -5.1219716061 | -1.091031702  | -0.8957653394 |
| H | -4.0517766519 | -2.2253611395 | -0.0598603648 |
| H | -3.8069213799 | -1.8928521495 | -1.7781651095 |
| H | 0.4934900343  | 1.5415280067  | 2.3108139827  |
| H | -0.9175067157 | 0.6981713685  | 1.716553054   |
| C | -0.5019444351 | 2.580203361   | 0.7133735936  |
| H | -1.0266548215 | 2.3424759051  | -0.2182968957 |
| C | 0.635413608   | 3.5648575193  | 0.41186248    |
| H | -1.2357017454 | 3.0797145381  | 1.3606268384  |
| H | 1.3742111066  | 3.0899794722  | -0.2461136083 |
| H | 1.166502513   | 3.7988652231  | 1.3446631553  |
| C | 0.1377584784  | 4.8586552583  | -0.2388599928 |
| H | 0.9610996027  | 5.5501072383  | -0.4456967013 |
| H | -0.5782628881 | 5.3759122423  | 0.4101505841  |
| H | -0.3702206878 | 4.6506974961  | -1.1877139325 |
| C | 3.0298163793  | -1.3512949671 | -0.7062635396 |
| H | 2.5673730432  | -2.5399727667 | 1.0291733414  |
| H | 3.3689176022  | -1.0315359037 | 1.4021708611  |
| H | 2.2329999147  | -1.7294525524 | -1.3586705439 |
| C | 4.3272629972  | -2.1083796375 | -1.0322776661 |
| H | 3.1612471283  | -0.2932191458 | -0.967583934  |
| C | 5.5677437199  | -1.5690417872 | -0.3106836872 |
| H | 4.4965439484  | -2.0625163056 | -2.1154947124 |
| H | 4.1950126093  | -3.1716212544 | -0.7893520334 |
| H | 6.4717221162  | -2.0959710104 | -0.6327974318 |
| H | 5.4904256496  | -1.6843496747 | 0.7749817919  |
| H | 5.7101734622  | -0.5025178958 | -0.521037612  |
| H | 5.7101734622  | -0.5025178958 | -0.521037612  |

TS endo 0623

E(RB3LYP) = -706.409416538 A.U.

First frequency = -541.2770  $\text{cm}^{-1}$

|   |               |               |               |
|---|---------------|---------------|---------------|
| H | -1.2821283709 | 0.4742160046  | -2.0111241489 |
| C | -0.9401164017 | -0.2792089154 | -1.3110359578 |
| H | -0.0884370803 | -0.8455484997 | -1.6669138849 |
| C | -1.8097109299 | -0.831216975  | -0.3754627705 |

|   |               |               |               |
|---|---------------|---------------|---------------|
| C | -1.2663954217 | -1.7201257679 | 0.5789391333  |
| C | 0.0518643432  | -2.1512015597 | 0.5452226933  |
| H | 0.4224957506  | -2.7633822775 | 1.3622631429  |
| H | 0.5274830785  | -2.3489079744 | -0.4088441123 |
| C | 1.3889621692  | -0.3604972998 | 0.5377497673  |
| H | 1.4333258994  | -0.4454055291 | 1.6214651907  |
| C | 2.5945288255  | -0.8886792681 | -0.2188660791 |
| C | 0.6497449675  | 0.7028786229  | 0.0171673584  |
| H | 1.0053761534  | 1.1602604152  | -0.9025654159 |
| C | -0.1611025928 | 1.5590155462  | 0.9577149858  |
| C | -3.2972798054 | -0.428814977  | -0.2614650373 |
| H | -1.8554285528 | -1.9502088462 | 1.4640598573  |
| C | -4.1377017838 | -1.726978842  | -0.347576573  |
| C | -3.7480571674 | 0.4926182581  | -1.4099712547 |
| C | -3.6108472976 | 0.2771052262  | 1.0770577305  |
| H | -3.3066567632 | -0.3257109618 | 1.9374483502  |
| H | -4.6880342309 | 0.4596740776  | 1.1649501974  |
| H | -3.1025783823 | 1.2423668215  | 1.1445575062  |
| H | -4.8202681806 | 0.6967880465  | -1.3213583335 |
| H | -3.5742649714 | 0.0299775654  | -2.38659699   |
| H | -3.2314625741 | 1.4567533044  | -1.3927467652 |
| H | -5.2076860223 | -1.4930720952 | -0.3029840577 |
| H | -3.9098029417 | -2.4120834844 | 0.4739264392  |
| H | -3.9412524294 | -2.2553274468 | -1.2860769174 |
| H | 0.4935367607  | 1.9178407693  | 1.7646411197  |
| H | -0.8958783533 | 0.9116512397  | 1.4551954799  |
| C | -0.8719705724 | 2.7571770274  | 0.3163318211  |
| H | -1.572715309  | 2.3897424865  | -0.4406385723 |
| C | 0.0540690802  | 3.7997622617  | -0.3335522694 |
| H | -1.478489713  | 3.2566556971  | 1.084012403   |
| H | -0.5697077773 | 4.5888623275  | -0.7724808592 |
| H | 0.593060784   | 3.3453065149  | -1.1747367343 |
| C | 1.0625100604  | 4.4317816096  | 0.6317655094  |
| H | 0.5554920781  | 4.8718300626  | 1.4985529072  |
| H | 1.6352141199  | 5.2257564353  | 0.1415041252  |
| H | 1.7787419839  | 3.6936791944  | 1.0066940215  |
| C | 3.3706724567  | -1.9921886801 | 0.5106611183  |
| H | 3.2717395996  | -0.0483470012 | -0.4226940841 |



|   |              |               |               |
|---|--------------|---------------|---------------|
| H | 2.2825150205 | -1.2548532604 | -1.2100412328 |
| H | 3.7048014331 | -1.606120835  | 1.4844375039  |
| C | 4.5839426297 | -2.5276474819 | -0.2652106495 |
| H | 2.6959082905 | -2.8270611572 | 0.7298619992  |
| C | 5.698346882  | -1.497790822  | -0.4850449371 |
| H | 4.2466687959 | -2.9155382207 | -1.2364201939 |
| H | 4.995798466  | -3.3875336043 | 0.2780773974  |
| H | 5.3650322714 | -0.6619901161 | -1.1083328453 |
| H | 6.5630487291 | -1.9511149266 | -0.9805135987 |
| H | 6.0408324342 | -1.0820761467 | 0.4698756044  |
| H | 6.0408324342 | -1.0820761467 | 0.4698756044  |

TS endo 0624

E(RB3LYP) = -706.410208941 A.U.

First frequency = -536.2358  $\text{cm}^{-1}$

|   |               |               |               |
|---|---------------|---------------|---------------|
| H | -0.8051516707 | 0.1918023791  | -1.8876572429 |
| C | -0.6361225245 | -0.4801393878 | -1.0546482318 |
| H | 0.2650573888  | -1.0683295578 | -1.1449864424 |
| C | -1.6887994137 | -0.9187043253 | -0.2600037537 |
| C | -1.3769991919 | -1.694486733  | 0.8786742902  |
| C | -0.0818753134 | -2.097447917  | 1.180790315   |
| H | 0.1020991915  | -2.6183379276 | 2.1169904441  |
| H | 0.5810376264  | -2.3975399908 | 0.3767301493  |
| C | 1.1778579247  | -0.3448146552 | 1.3800931156  |
| H | 0.8514817588  | -0.2464033242 | 2.4139805651  |
| C | 2.5569126915  | -0.9749693221 | 1.2415804725  |
| C | 0.7082851105  | 0.6453267096  | 0.5117431314  |
| H | 1.3233048921  | 0.9302902796  | -0.3349030962 |
| C | -0.2542692281 | 1.6747687027  | 1.051222114   |
| C | -3.157410873  | -0.4982977199 | -0.496839591  |
| H | -2.1437101731 | -1.8295100694 | 1.6382441679  |
| C | -3.3465775623 | 0.2562470113  | -1.826095145  |
| C | -3.6977112642 | 0.3895846838  | 0.6465707775  |
| C | -4.0091787934 | -1.7895324993 | -0.5706718263 |
| H | -3.6514821785 | -2.445507973  | -1.3708249573 |
| H | -5.0580920624 | -1.5433291473 | -0.7721851441 |
| H | -3.9726153066 | -2.3551026565 | 0.3645991429  |

|   |               |               |               |
|---|---------------|---------------|---------------|
| H | -3.5803496269 | -0.0889260382 | 1.6230995038  |
| H | -4.7655898016 | 0.5887724879  | 0.5000902361  |
| H | -3.1803620387 | 1.3520977498  | 0.6781955155  |
| H | -4.4091856102 | 0.4702323721  | -1.9820511593 |
| H | -2.9946660297 | -0.3366676309 | -2.6761807686 |
| H | -2.818302215  | 1.2140210268  | -1.8369819823 |
| H | 0.2226438487  | 2.1886464905  | 1.8991312066  |
| H | -1.1106662029 | 1.1432244012  | 1.4874413823  |
| C | -0.7515495981 | 2.7269328091  | 0.0522314307  |
| H | -1.3485136157 | 2.2328207248  | -0.7204242672 |
| C | 0.3489542282  | 3.5555237175  | -0.632361601  |
| H | -1.4309537527 | 3.4103784455  | 0.5796318396  |
| H | -0.1310973591 | 4.2820274435  | -1.300273574  |
| H | 0.9497257026  | 2.9073617666  | -1.2832338175 |
| C | 1.2741155192  | 4.2948414266  | 0.3399505534  |
| H | 1.8581673583  | 3.596279907   | 0.9478549221  |
| H | 0.6999130296  | 4.9300302184  | 1.0246365054  |
| H | 1.9813870872  | 4.9358952413  | -0.1962844074 |
| C | 3.0729906184  | -1.1870839798 | -0.1872620834 |
| H | 2.5732765925  | -1.9389423593 | 1.7678184258  |
| H | 3.2778071364  | -0.3390092825 | 1.7782984376  |
| H | 2.3675705512  | -1.8075584916 | -0.756025142  |
| C | 4.4557095249  | -1.8482090786 | -0.2252910995 |
| H | 3.1243925903  | -0.2258618291 | -0.7144871512 |
| C | 4.9797636119  | -2.0524445271 | -1.6494314823 |
| H | 4.4081893643  | -2.8156490957 | 0.292723763   |
| H | 5.1652985522  | -1.2331314775 | 0.3446926852  |
| H | 4.3028761572  | -2.6891231671 | -2.2306423381 |
| H | 5.9667659957  | -2.5260745039 | -1.6512120821 |
| H | 5.0671871939  | -1.0963071458 | -2.1780707161 |
| H | 5.0671871939  | -1.0963071458 | -2.1780707161 |

TS endo 0626

E(RB3LYP) = -706.409441298 A.U.

First frequency = -531.8463  $\text{cm}^{-1}$

|   |               |               |               |
|---|---------------|---------------|---------------|
| H | -1.2313695214 | 0.0747528784  | -2.1089553937 |
| C | -0.8816337271 | -0.5336930145 | -1.2832949574 |

|   |               |               |               |
|---|---------------|---------------|---------------|
| H | -0.150213258  | -1.2782896693 | -1.5726444086 |
| C | -1.6738816897 | -0.7347036104 | -0.1570740526 |
| C | -1.1092382573 | -1.4493003212 | 0.9239175829  |
| C | 0.1470830757  | -2.0279738058 | 0.8774420995  |
| H | 0.5511598019  | -2.4763484247 | 1.7800198729  |
| H | 0.5109666925  | -2.468698955  | -0.0432367381 |
| C | 1.6276967934  | -0.4059960353 | 0.3230269619  |
| H | 1.7321728733  | -0.1892581194 | 1.3837786796  |
| C | 2.728025009   | -1.2502156304 | -0.2972985514 |
| C | 0.9566446967  | 0.5344651565  | -0.4583341171 |
| H | 1.2764668955  | 0.6291137105  | -1.4952592395 |
| C | 0.3800775169  | 1.7840395235  | 0.1702687615  |
| C | -3.0933538091 | -0.1470346418 | -0.0026036942 |
| H | -1.6112641801 | -1.4081520398 | 1.8872705892  |
| C | -3.5005500033 | 0.742007011   | -1.1909202536 |
| C | -3.2505693252 | 0.6836381307  | 1.2904926202  |
| C | -4.0738666457 | -1.3445529419 | 0.0578764687  |
| H | -4.0054102037 | -1.9491927494 | -0.8523002335 |
| H | -5.1070133503 | -0.9918145633 | 0.159421412   |
| H | -3.8521114083 | -1.9961155979 | 0.9085717139  |
| H | -2.5833481398 | 1.5480809641  | 1.2890388972  |
| H | -3.040807417  | 0.0967091495  | 2.1885679731  |
| H | -4.2783053343 | 1.0540960289  | 1.3768488241  |
| H | -3.4701187276 | 0.1937155532  | -2.1375351834 |
| H | -2.8528009025 | 1.618647115   | -1.2814230541 |
| H | -4.5251158785 | 1.1018296249  | -1.0502736822 |
| H | 1.142038195   | 2.2371842926  | 0.8232507615  |
| H | -0.446230762  | 1.5013429908  | 0.8345292505  |
| C | -0.0636183817 | 2.834057512   | -0.855574604  |
| H | 0.7504454645  | 2.973859199   | -1.5800032866 |
| C | -0.4220302923 | 4.2029350439  | -0.2591855137 |
| H | -0.9137667953 | 2.4471950632  | -1.4301754347 |
| H | -0.6295348926 | 4.9000536003  | -1.0811019618 |
| H | 0.4552598537  | 4.6051807752  | 0.2660295818  |
| C | -1.6199350839 | 4.1860444603  | 0.695862341   |
| H | -2.5089776587 | 3.7728914643  | 0.2061643204  |
| H | -1.8673781537 | 5.1961486847  | 1.0385793417  |
| H | -1.4189000182 | 3.5789990012  | 1.5842612815  |

|   |              |               |               |
|---|--------------|---------------|---------------|
| C | 3.444102977  | -2.1932891826 | 0.6773627248  |
| H | 3.4682005951 | -0.5738884166 | -0.7459136704 |
| H | 2.3218708284 | -1.8324076234 | -1.1396881215 |
| H | 3.8592912777 | -1.5998361577 | 1.5046518851  |
| C | 4.5670075206 | -3.0247753443 | 0.0375716296  |
| H | 2.7152178096 | -2.8752612741 | 1.1280001147  |
| C | 5.7560741865 | -2.1999349133 | -0.4689273635 |
| H | 4.1502862648 | -3.6142154662 | -0.7909074116 |
| H | 4.9276643653 | -3.7524756753 | 0.7755369633  |
| H | 6.1800275218 | -1.5893207618 | 0.3369077083  |
| H | 5.4684762646 | -1.523061494  | -1.2796236481 |
| H | 6.5521134586 | -2.8476732746 | -0.8503633768 |
| H | 6.5521134586 | -2.8476732746 | -0.8503633768 |

TS endo 0632

E(RB3LYP) = -706.408161188 A.U.

First frequency = -512.6536 cm<sup>-1</sup>

|   |               |               |               |
|---|---------------|---------------|---------------|
| H | -1.9052257683 | 0.2029141071  | -1.9502482694 |
| C | -1.3197577015 | -0.4957058218 | -1.3636118336 |
| H | -0.6192421731 | -1.0745364829 | -1.9541378056 |
| C | -1.8130374397 | -1.0114024456 | -0.168089979  |
| C | -0.9474364007 | -1.8302148063 | 0.5928032033  |
| C | 0.3206465277  | -2.1867256517 | 0.1731406365  |
| H | 0.9729756459  | -2.7285467825 | 0.8500917413  |
| H | 0.5305009693  | -2.3465291062 | -0.8775050559 |
| C | 1.4217691132  | -0.2008767966 | -0.2931174608 |
| H | 1.692968011   | -0.1571565214 | 0.7561753418  |
| C | 2.4848288282  | -0.6902197718 | -1.2564738685 |
| C | 0.4410135859  | 0.6914182095  | -0.7271115575 |
| H | 0.5079274881  | 1.0378808126  | -1.7572590674 |
| C | -0.1720695995 | 1.6527521895  | 0.2647807073  |
| C | -3.188677562  | -0.6207057795 | 0.4125095056  |
| H | -1.2185039869 | -2.0490737495 | 1.6231073207  |
| C | -3.0782714705 | 0.0078863611  | 1.8206013167  |
| C | -4.0292310024 | -1.9173151965 | 0.5128431793  |
| C | -3.9446916805 | 0.3728321499  | -0.4879971    |
| H | -4.9228948762 | 0.5991049372  | -0.0511800727 |

|   |               |               |               |
|---|---------------|---------------|---------------|
| H | -4.1145672298 | -0.0357739459 | -1.489094805  |
| H | -3.4027171511 | 1.3187180254  | -0.5917170598 |
| H | -4.141396554  | -2.3847523514 | -0.4707816059 |
| H | -5.0291552073 | -1.6990113237 | 0.905801524   |
| H | -3.5570556946 | -2.6476621123 | 1.1769001335  |
| H | -2.5558283154 | -0.6445869428 | 2.5253800967  |
| H | -4.0784375846 | 0.1955572807  | 2.2273704106  |
| H | -2.5460338332 | 0.9619583215  | 1.7862823619  |
| H | -0.4472774206 | 1.0879301071  | 1.1626959345  |
| H | -1.103175275  | 2.069812215   | -0.1339709257 |
| C | 0.7763518689  | 2.7984855201  | 0.6763433441  |
| H | 0.2526788925  | 3.4463977436  | 1.393440397   |
| C | 1.2957958007  | 3.6541328178  | -0.4897479171 |
| H | 1.634443861   | 2.3707873349  | 1.2104271873  |
| H | 1.9095388808  | 3.0287815229  | -1.1507107608 |
| H | 1.9679711874  | 4.4231794265  | -0.0885411123 |
| C | 0.1894578854  | 4.3275499407  | -1.3090217547 |
| H | -0.4604906293 | 4.9356883176  | -0.6688443527 |
| H | -0.443839716  | 3.5909000682  | -1.814765207  |
| H | 0.6085737398  | 4.9837488647  | -2.0787174992 |
| C | 3.4656657047  | -1.7642762141 | -0.7551593855 |
| H | 3.0825926011  | 0.1788698918  | -1.5732083843 |
| H | 1.9957100399  | -1.0501373337 | -2.174208792  |
| H | 2.9353439729  | -2.7026689743 | -0.5559061993 |
| C | 4.292762894   | -1.3680272057 | 0.4897584855  |
| H | 4.1516163881  | -1.9806854202 | -1.5832072967 |
| C | 3.7075159901  | -1.8393316425 | 1.827733677   |
| H | 4.4241296601  | -0.2775944421 | 0.5070299037  |
| H | 5.3017385125  | -1.7878220316 | 0.3958421292  |
| H | 2.7127776173  | -1.4263467599 | 2.0148173716  |
| H | 4.3511614783  | -1.5484722049 | 2.6647816619  |
| H | 3.6142187762  | -2.9314514677 | 1.8447922229  |
| H | 3.6142187762  | -2.9314514677 | 1.8447922229  |

TS endo 0634

E(RB3LYP) = -706.409941486 A.U.

First frequency = -539.4504 cm<sup>-1</sup>

|   |               |               |               |
|---|---------------|---------------|---------------|
| H | -0.7690305572 | 0.4638932809  | -1.8248646952 |
| C | -0.5646386005 | -0.3056647757 | -1.0901015595 |
| H | 0.3195216412  | -0.8874040706 | -1.3044091112 |
| C | -1.5798542912 | -0.8302638564 | -0.2982781101 |
| C | -1.2176939203 | -1.7437469409 | 0.7161595566  |
| C | 0.0866297939  | -2.1919238871 | 0.8912262624  |
| H | 0.314821025   | -2.8246616059 | 1.745243593   |
| H | 0.6970525023  | -2.4001202647 | 0.0194846595  |
| C | 1.3866138216  | -0.4889703233 | 1.220476575   |
| H | 1.133981798   | -0.5241003192 | 2.2787944523  |
| C | 2.7431319261  | -1.1059885064 | 0.9076090507  |
| C | 0.8696885454  | 0.6083426947  | 0.5244588036  |
| H | 1.4281941647  | 1.010003696   | -0.3144363216 |
| C | -0.054813966  | 1.5481951473  | 1.2603686709  |
| C | -3.051791674  | -0.3691813884 | -0.3987853493 |
| H | -1.9429514673 | -1.9658020379 | 1.4957227216  |
| C | -3.2956693637 | 0.5651280987  | -1.5984853523 |
| C | -3.5216911951 | 0.3575368287  | 0.8813147614  |
| C | -3.9243803996 | -1.6317088745 | -0.6050462845 |
| H | -4.9788901731 | -1.3532340569 | -0.714358277  |
| H | -3.8464531076 | -2.3217085921 | 0.2399211082  |
| H | -3.6177886874 | -2.1726633637 | -1.5061006463 |
| H | -3.3626952786 | -0.2497690259 | 1.7769452657  |
| H | -4.5926215832 | 0.5824667768  | 0.8181998676  |
| H | -2.9897925148 | 1.3031111058  | 1.01551736    |
| H | -4.3612464657 | 0.8082253647  | -1.6672558579 |
| H | -2.9973827017 | 0.0944474841  | -2.540574092  |
| H | -2.7530272345 | 1.5100082306  | -1.5015129692 |
| H | 0.4708019623  | 1.9385198753  | 2.1465096406  |
| H | -0.8884412609 | 0.9540496437  | 1.6580352861  |
| C | -0.5862996844 | 2.7364923689  | 0.4526248119  |
| H | -1.0930372693 | 2.3677903883  | -0.4458738523 |
| C | 0.4895732989  | 3.7503521405  | 0.0419460458  |
| H | -1.350919364  | 3.2574797147  | 1.044863564   |
| H | 1.2592410493  | 3.2525283418  | -0.5614062997 |
| H | 1.0010149257  | 4.117779147   | 0.942131799   |
| C | -0.0838999287 | 4.9316033187  | -0.7459427946 |
| H | 0.6961688411  | 5.6457634611  | -1.0292095946 |

|   |               |               |               |
|---|---------------|---------------|---------------|
| H | -0.833515185  | 5.4717018106  | -0.1561712023 |
| H | -0.5736185755 | 4.5897152597  | -1.6651260091 |
| C | 3.1524426892  | -1.1401789287 | -0.5716420371 |
| H | 2.774504639   | -2.1226663207 | 1.3171151685  |
| H | 3.5108558038  | -0.5438555074 | 1.4621243618  |
| H | 2.4089224917  | -1.6991538567 | -1.1556289747 |
| C | 4.5375377565  | -1.7614264737 | -0.8147282508 |
| H | 3.1508309021  | -0.1199185199 | -0.9731343247 |
| C | 4.6197994968  | -3.2584643944 | -0.4941142774 |
| H | 5.2857939053  | -1.2167382657 | -0.2226665034 |
| H | 4.8108464668  | -1.6075171079 | -1.8662000492 |
| H | 4.4479239698  | -3.4596366389 | 0.5679432497  |
| H | 5.6046426398  | -3.6631616711 | -0.7488185792 |
| H | 3.8703993861  | -3.8215635237 | -1.0627612306 |
| H | 3.8703993861  | -3.8215635237 | -1.0627612306 |

TS endo 0636

E(RB3LYP) = -706.408436182 A.U.

First frequency = -504.2076  $\text{cm}^{-1}$

|   |               |               |               |
|---|---------------|---------------|---------------|
| H | -1.5937503813 | -0.1971353288 | -2.1583205145 |
| C | -1.1221721202 | -0.6798587307 | -1.3075943203 |
| H | -0.2032518459 | -1.1962137978 | -1.555432485  |
| C | -1.8838667058 | -1.0724224166 | -0.2116027838 |
| C | -1.198470953  | -1.594390576  | 0.9092941579  |
| C | 0.1673729564  | -1.823801865  | 0.9164667038  |
| H | 0.6456004596  | -2.1297788372 | 1.8419428474  |
| H | 0.6731542617  | -2.1590023299 | 0.0185552127  |
| C | 1.1877540212  | 0.1476580773  | 0.3883864727  |
| H | 1.1967066562  | 0.3555593055  | 1.455333657   |
| C | 2.4909893316  | -0.3479108487 | -0.2055768436 |
| C | 0.2892315473  | 0.8659414019  | -0.3974497141 |
| H | 0.5741836724  | 1.0701246091  | -1.4262820549 |
| C | -0.6746726258 | 1.8286884835  | 0.2536237692  |
| C | -3.4134217337 | -0.8558941279 | -0.2005525323 |
| H | -1.7214441052 | -1.6597716988 | 1.8577949459  |
| C | -4.0339095658 | -1.0714741085 | 1.1928701926  |
| C | -4.0262339047 | -1.8981270973 | -1.168708672  |

|   |               |               |               |
|---|---------------|---------------|---------------|
| C | -3.8153632257 | 0.5563127446  | -0.6777360268 |
| H | -4.9064104379 | 0.6281592245  | -0.7478913226 |
| H | -3.4100476382 | 0.7939754172  | -1.6649312499 |
| H | -3.4724476419 | 1.3223069696  | 0.0218927118  |
| H | -3.6549264559 | -1.751194632  | -2.1876370614 |
| H | -5.1195169751 | -1.8159435011 | -1.1873372635 |
| H | -3.7643834183 | -2.9157900185 | -0.8610913923 |
| H | -5.116469293  | -0.9151233353 | 1.1435285335  |
| H | -3.6295077213 | -0.3678887212 | 1.9282695953  |
| H | -3.8663780991 | -2.0880985163 | 1.561834153   |
| H | -1.2660989356 | 1.2629151948  | 0.9869663734  |
| H | -1.3823116756 | 2.2056189517  | -0.4927644934 |
| C | -0.0381356587 | 3.0301809805  | 0.9870143578  |
| H | -0.8454015409 | 3.5472972052  | 1.5229784079  |
| C | 0.68985662    | 4.0576681024  | 0.1031793842  |
| H | 0.653062264   | 2.66392046    | 1.7577502784  |
| H | 0.8082557082  | 4.9832805533  | 0.6814815516  |
| H | 0.0484080386  | 4.3174294419  | -0.7506220127 |
| C | 2.0729477702  | 3.6274527742  | -0.4022420661 |
| H | 2.7166364282  | 3.3278927119  | 0.4329606954  |
| H | 2.570048204   | 4.4488834844  | -0.9295081275 |
| H | 2.0156484885  | 2.7784996261  | -1.0873351027 |
| C | 3.3965738465  | -1.1080703597 | 0.7717523265  |
| H | 3.0530321639  | 0.5176424254  | -0.5900715795 |
| H | 2.2755668061  | -0.9678144311 | -1.0878164057 |
| H | 3.531003098   | -0.4911874865 | 1.670617004   |
| C | 4.7759374328  | -1.4631831786 | 0.1968060942  |
| H | 2.900782063   | -2.0281374196 | 1.1039952267  |
| C | 4.7259415275  | -2.4496536927 | -0.9758703973 |
| H | 5.3921680484  | -1.890919836  | 0.9977095131  |
| H | 5.2843168094  | -0.5422586172 | -0.1204548191 |
| H | 4.2016893447  | -2.0285188107 | -1.8397056678 |
| H | 4.2049721194  | -3.3710717222 | -0.6899784392 |
| H | 5.7329676815  | -2.7246223297 | -1.3058383793 |
| H | 5.7329676815  | -2.7246223297 | -1.3058383793 |

TS endo 0646

E(RB3LYP) = -706.408430420 A.U.



First frequency =  $-555.0636 \text{ cm}^{-1}$

|   |               |               |               |
|---|---------------|---------------|---------------|
| H | -0.7720210679 | -0.6999340772 | -2.1467499953 |
| C | -0.534154825  | -0.9441424886 | -1.1176270823 |
| H | 0.2360230534  | -1.6971290017 | -1.0212282527 |
| C | -1.4896835046 | -0.7989004906 | -0.1118853851 |
| C | -1.0717113076 | -1.0235730324 | 1.2172229481  |
| C | 0.2184050243  | -1.4140641475 | 1.5399542118  |
| H | 0.5215128087  | -1.4451726505 | 2.5831129538  |
| H | 0.748497275   | -2.1123627039 | 0.903860709   |
| C | 1.6230495797  | 0.0774998408  | 0.6223206423  |
| H | 1.4685890973  | 0.7127978068  | 1.487514921   |
| C | 2.908446944   | -0.7348370117 | 0.6994340749  |
| C | 1.0742493782  | 0.5102427851  | -0.59085302   |
| H | 1.5775747747  | 0.1878374461  | -1.498846043  |
| C | 0.3889337246  | 1.8636055167  | -0.7349856253 |
| C | -2.9302253022 | -0.3147906032 | -0.3855932498 |
| H | -1.7201679008 | -0.6931129217 | 2.0254695932  |
| C | -3.8784885874 | -1.473781505  | 0.009696258   |
| C | -3.1681182337 | 0.0149590196  | -1.8702796795 |
| C | -3.3082000409 | 0.9357744738  | 0.4386174465  |
| H | -2.7186152373 | 1.8011859649  | 0.1295219568  |
| H | -3.1558989552 | 0.7888863471  | 1.5112379061  |
| H | -4.3657907897 | 1.180356708   | 0.2883605173  |
| H | -2.5230460587 | 0.8312265837  | -2.212686806  |
| H | -4.2060352161 | 0.3309700743  | -2.0180017978 |
| H | -2.9908224886 | -0.8530406048 | -2.5128296552 |
| H | -3.7830817261 | -1.7193407418 | 1.0717450027  |
| H | -3.6478526008 | -2.3775169195 | -0.5635290836 |
| H | -4.9226648316 | -1.2008601014 | -0.1834316741 |
| H | -0.4778541179 | 1.7778954631  | -1.4011368908 |
| H | 1.0893554891  | 2.5374143433  | -1.2537077774 |
| C | -0.054079608  | 2.5431351276  | 0.5652670282  |
| H | -0.6882763725 | 1.858505789   | 1.1396083854  |
| C | -0.7989435923 | 3.859861778   | 0.320061775   |
| H | 0.8219049456  | 2.7488625755  | 1.1941405665  |
| H | -1.645966584  | 3.6832197979  | -0.3568226494 |
| H | -0.1350050633 | 4.5573142891  | -0.2087982983 |

|   |               |               |               |
|---|---------------|---------------|---------------|
| C | -1.305617217  | 4.5040949421  | 1.6130982373  |
| H | -2.0058460358 | 3.8389917808  | 2.1313829829  |
| H | -1.823544658  | 5.4488458346  | 1.4184256881  |
| H | -0.4780152299 | 4.7118360975  | 2.3009956824  |
| C | 3.1741523801  | -1.729285135  | -0.4382161861 |
| H | 2.9407184632  | -1.277585498  | 1.6535455487  |
| H | 3.7529222943  | -0.0286920278 | 0.7403586735  |
| H | 2.3404157884  | -2.4387615345 | -0.525163783  |
| C | 4.4752395666  | -2.516379796  | -0.2422513031 |
| H | 3.2216424039  | -1.1992958067 | -1.3981442319 |
| C | 4.7540904137  | -3.5009596783 | -1.3812518845 |
| H | 4.429231781   | -3.0591347387 | 0.7115782711  |
| H | 5.3126110154  | -1.8113287081 | -0.1502145004 |
| H | 4.8372637755  | -2.9793468668 | -2.3416185988 |
| H | 3.9453000634  | -4.2348312545 | -1.4743218593 |
| H | 5.686471152   | -4.0512007713 | -1.2186577516 |
| H | 5.686471152   | -4.0512007713 | -1.2186577516 |

TS endo 0650

E(RB3LYP) = -706.408362607 A.U.

First frequency = -549.2043  $\text{cm}^{-1}$

|   |               |               |               |
|---|---------------|---------------|---------------|
| H | -1.4677332025 | -0.918576556  | -2.1832153553 |
| C | -1.0175326471 | -1.1003121355 | -1.213506389  |
| H | -0.3039803341 | -1.917317425  | -1.2224242979 |
| C | -1.7283966109 | -0.8202711665 | -0.0435986021 |
| C | -1.0496014911 | -0.9915398273 | 1.1814454292  |
| C | 0.238758425   | -1.4889505202 | 1.2685703584  |
| H | 0.7455670839  | -1.4785972245 | 2.2288421036  |
| H | 0.5767211258  | -2.2620149682 | 0.5897738274  |
| C | 1.5392779555  | -0.2223830694 | -0.1784732506 |
| H | 1.7493371123  | 0.4193295367  | 0.6696331344  |
| C | 2.6067059001  | -1.2452950872 | -0.5176884744 |
| C | 0.687985827   | 0.2452843094  | -1.1854400054 |
| H | 0.9082085281  | -0.1183366676 | -2.1888113407 |
| C | 0.1010131865  | 1.6504644749  | -1.1711957966 |
| C | -3.1582336692 | -0.2392850354 | -0.0461548118 |
| H | -1.4857512334 | -0.5552237511 | 2.0774862009  |

|   |               |               |               |
|---|---------------|---------------|---------------|
| C | -3.6978546433 | -0.0088597907 | -1.4693672793 |
| C | -3.2541843445 | 1.1013038654  | 0.7155968752  |
| C | -4.0727768661 | -1.2744949609 | 0.654130932   |
| H | -5.1120347956 | -0.9253598104 | 0.6655839462  |
| H | -3.7609370867 | -1.4438281446 | 1.6891596042  |
| H | -4.0396442561 | -2.237330202  | 0.1341400535  |
| H | -4.2973736848 | 1.4332882448  | 0.765401166   |
| H | -2.679085662  | 1.879865613   | 0.2102876793  |
| H | -2.8863443472 | 1.0230592414  | 1.742185797   |
| H | -4.7206538261 | 0.37882618    | -1.4195429371 |
| H | -3.7223543242 | -0.936717873  | -2.0493353469 |
| H | -3.0951754081 | 0.7218171602  | -2.0193163531 |
| H | -0.9215492772 | 1.6326128742  | -1.5674983811 |
| H | 0.6793663976  | 2.2609399097  | -1.8823126456 |
| C | 0.0945255617  | 2.3676250503  | 0.1834599902  |
| H | -0.4362042978 | 1.7545168929  | 0.9202120715  |
| C | -0.536905443  | 3.7622556351  | 0.1121803342  |
| H | 1.1229839251  | 2.4700406319  | 0.5530409794  |
| H | -1.5466336505 | 3.6897890752  | -0.3139288212 |
| H | 0.0385977143  | 4.3834442306  | -0.5878342964 |
| C | -0.6091038804 | 4.4502736234  | 1.4778754594  |
| H | -1.2178426313 | 3.8657080582  | 2.1771563439  |
| H | -1.0506174256 | 5.4494746456  | 1.4045953615  |
| H | 0.3885237396  | 4.5569143025  | 1.9191117773  |
| C | 3.5150540989  | -1.6304193478 | 0.6563701845  |
| H | 3.2254778891  | -0.8447179693 | -1.3325307639 |
| H | 2.139660707   | -2.1529050197 | -0.9340510995 |
| H | 4.0038611608  | -0.722524409  | 1.0381254418  |
| C | 4.5869061071  | -2.6749146107 | 0.3089604528  |
| H | 2.901847868   | -2.0138370887 | 1.4790774163  |
| C | 5.6300307524  | -2.1966199983 | -0.7078390366 |
| H | 4.0953950228  | -3.5819583084 | -0.0694334935 |
| H | 5.0999242834  | -2.9712263837 | 1.2326805285  |
| H | 5.1811825525  | -1.9806948208 | -1.6825540382 |
| H | 6.4051118497  | -2.95383066   | -0.8648103998 |
| H | 6.12326505    | -1.2810094861 | -0.3608968157 |
| H | 6.12326505    | -1.2810094861 | -0.3608968157 |

TS endo 0657

E(RB3LYP) = -706.408823415 A.U.

First frequency = -537.5043  $\text{cm}^{-1}$

|   |               |               |               |
|---|---------------|---------------|---------------|
| H | -1.6929308106 | 0.3686368609  | -1.964068951  |
| C | -1.1715310771 | -0.3389830871 | -1.3304313233 |
| H | -0.3982281284 | -0.8940494052 | -1.8468771499 |
| C | -1.7823277423 | -0.8708102562 | -0.1994970766 |
| C | -1.0008316077 | -1.698915647  | 0.6369847654  |
| C | 0.2966541237  | -2.0772464719 | 0.3217003602  |
| H | 0.8703481718  | -2.6408473616 | 1.0519303233  |
| H | 0.5568876425  | -2.2928049454 | -0.7083931846 |
| C | 1.5049425637  | -0.2338972914 | -0.0277160677 |
| H | 1.7696372309  | -0.2546406044 | 1.0256518637  |
| C | 2.5543125751  | -0.7407221369 | -1.002182578  |
| C | 0.6207590396  | 0.769956833   | -0.4270802082 |
| H | 0.7396859537  | 1.1877303956  | -1.4227612095 |
| C | -0.0224493803 | 1.6427712077  | 0.6246670647  |
| C | -3.2201666745 | -0.5076023228 | 0.2330843831  |
| H | -1.3664050279 | -1.9167452592 | 1.6377728828  |
| C | -3.268723481  | 0.1407354609  | 1.6351312136  |
| C | -4.0337820576 | -1.8247885218 | 0.2674375749  |
| C | -3.9091041403 | 0.4504980103  | -0.755457214  |
| H | -3.3971213111 | 1.4158191213  | -0.8087730928 |
| H | -4.9373630048 | 0.6407351373  | -0.4304425921 |
| H | -3.9522352845 | 0.0275256528  | -1.7640060076 |
| H | -5.0749862341 | -1.6263800851 | 0.5473972933  |
| H | -3.6185746351 | -2.5332049925 | 0.9904599136  |
| H | -4.0290545017 | -2.3094375816 | -0.7142446507 |
| H | -2.7666486402 | 1.1119067984  | 1.6392510546  |
| H | -2.7971868756 | -0.486049995  | 2.3968614485  |
| H | -4.3091591618 | 0.3018627428  | 1.9393624673  |
| H | 0.7594145647  | 2.0441220215  | 1.2876563157  |
| H | -0.6281859885 | 0.9886530738  | 1.2652853981  |
| C | -0.8666970821 | 2.8136380226  | 0.0916846477  |
| H | -1.3707655846 | 2.5033456625  | -0.8318720677 |
| C | -0.0767613519 | 4.1079262374  | -0.1680371356 |
| H | -1.6635177058 | 3.043109945   | 0.8100028823  |

|   |               |               |               |
|---|---------------|---------------|---------------|
| H | 0.3590320912  | 4.4524062197  | 0.7799132207  |
| H | -0.7799399885 | 4.8907010328  | -0.4808685506 |
| C | 1.0350493181  | 3.9852953688  | -1.2155173732 |
| H | 1.8070458523  | 3.2758769197  | -0.9014664039 |
| H | 1.5220944241  | 4.9508579821  | -1.3875771332 |
| H | 0.6362701583  | 3.6372393402  | -2.1757212986 |
| C | 3.4801962123  | -1.8541090315 | -0.4881080661 |
| H | 3.1827984973  | 0.1083761197  | -1.310977156  |
| H | 2.055063952   | -1.0787184815 | -1.9224422568 |
| H | 2.8939868659  | -2.7387277812 | -0.2120022513 |
| C | 4.3601812791  | -1.4421781953 | 0.6992135114  |
| H | 4.1322193046  | -2.1704890061 | -1.31335152   |
| C | 5.3184640047  | -2.5540529462 | 1.1362253659  |
| H | 3.7297459644  | -1.1549300569 | 1.5498949212  |
| H | 4.932724096   | -0.5443858593 | 0.428576311   |
| H | 5.9898021592  | -2.840288496  | 0.3184654088  |
| H | 4.7671061518  | -3.4520001599 | 1.4382502433  |
| H | 5.9379507224  | -2.242625276  | 1.9835077079  |
| H | 5.9379507224  | -2.242625276  | 1.9835077079  |

TS endo 0658

E(RB3LYP) = -706.409671367 A.U.

First frequency = -532.8932  $\text{cm}^{-1}$

|   |               |               |               |
|---|---------------|---------------|---------------|
| H | -0.7004576189 | 0.3924775852  | -2.020566138  |
| C | -0.4922132255 | -0.3371084278 | -1.2475409877 |
| H | 0.3308661094  | -0.9972706096 | -1.4809590362 |
| C | -1.4755671877 | -0.7335723835 | -0.3484887992 |
| C | -1.0998077463 | -1.6018149161 | 0.7010030856  |
| C | 0.1854935537  | -2.1035955929 | 0.8382457182  |
| H | 0.4348085047  | -2.6829932767 | 1.7234410996  |
| H | 0.7523356227  | -2.381527617  | -0.0427193459 |
| C | 1.5655363302  | -0.4070530346 | 0.9823412316  |
| H | 1.3068935946  | -0.2912352456 | 2.0332838854  |
| C | 2.8763729364  | -1.1510773935 | 0.7595751637  |
| C | 1.1257286694  | 0.6171678423  | 0.1396664163  |
| H | 1.6959769412  | 0.8210940907  | -0.7626799179 |
| C | 0.3689942422  | 1.7933567948  | 0.7175371842  |

|   |               |               |               |
|---|---------------|---------------|---------------|
| C | -2.923975985  | -0.1982806021 | -0.3870326654 |
| H | -1.7878167367 | -1.7360194271 | 1.5319370691  |
| C | -3.850792863  | -1.409507473  | -0.6553085384 |
| C | -3.146438521  | 0.8280860961  | -1.5119684096 |
| C | -3.3416892722 | 0.4582106672  | 0.947701843   |
| H | -2.7272955262 | 1.334534145   | 1.165922901   |
| H | -3.2578148787 | -0.2310806588 | 1.7920730434  |
| H | -4.3860350908 | 0.7865364438  | 0.8959926493  |
| H | -2.917822669  | 0.4067880311  | -2.4958556405 |
| H | -2.5334370975 | 1.7229975005  | -1.3715994832 |
| H | -4.194499082  | 1.145150065   | -1.5222937206 |
| H | -3.5942730804 | -1.8921852921 | -1.6039423291 |
| H | -4.8980770212 | -1.0889965942 | -0.7050124739 |
| H | -3.7638147157 | -2.1609845643 | 0.1352017215  |
| H | 0.9518074953  | 2.210912542   | 1.5542228366  |
| H | -0.5653097778 | 1.4311950236  | 1.1640030325  |
| C | 0.1044266801  | 2.9187298931  | -0.2892961111 |
| H | 1.0448959081  | 3.1448982817  | -0.8104455648 |
| C | -0.4327573256 | 4.2170071128  | 0.3307414674  |
| H | -0.5891607114 | 2.5648795969  | -1.0608267076 |
| H | -0.4978404288 | 4.9805920304  | -0.4549214703 |
| H | 0.2961420116  | 4.5941424062  | 1.061327211   |
| C | -1.8009601807 | 4.0776880943  | 1.0065848023  |
| H | -2.1621617994 | 5.0443826803  | 1.3726885968  |
| H | -1.7603655561 | 3.397547836   | 1.8633248571  |
| H | -2.5483003999 | 3.6853954349  | 0.3076337045  |
| C | 3.2894687122  | -1.3772884808 | -0.7016666235 |
| H | 2.8352827505  | -2.1149028409 | 1.2800515255  |
| H | 3.6796211833  | -0.5854155088 | 1.2572983961  |
| H | 2.4855916096  | -1.8913083193 | -1.2460622953 |
| C | 4.5881106826  | -2.1851442951 | -0.8582014149 |
| H | 3.4179216996  | -0.406946779  | -1.195638225  |
| C | 4.472228541   | -3.6510322834 | -0.4240423761 |
| H | 5.3890438865  | -1.6943425834 | -0.28833849   |
| H | 4.8982427609  | -2.1500866018 | -1.9101178925 |
| H | 3.6721663457  | -4.1592515911 | -0.975006206  |
| H | 4.2492368108  | -3.7458719841 | 0.6433049232  |
| H | 5.4040446671  | -4.1937194384 | -0.6132899086 |

H 5.4040446671 -4.1937194384 -0.6132899086

TS endo 0661

E(RB3LYP) = -706.407789068 A.U.

First frequency = -516.6432 cm<sup>-1</sup>

H -0.8315453606 -0.6713523718 -1.9664028794  
C -0.714823592 -1.0874672492 -0.9702349252  
H 0.0185838707 -1.8795626439 -0.9114234289  
C -1.7585128355 -1.0218490067 -0.0518943603  
C -1.5019569046 -1.4699373817 1.2630626616  
C -0.282766514 -2.0091223023 1.6414470519  
H -0.1042867289 -2.2382092465 2.688582458  
H 0.2838771442 -2.622680902 0.9502413  
C 1.2929952259 -0.4819106366 1.2244271536  
H 1.0034443974 0.0263756145 2.1420588433  
C 2.5270161964 -1.3614777998 1.3800726761  
C 0.9297100993 0.1621975449 0.0395944079  
H 1.5237442841 -0.0105457385 -0.8519850394  
C 0.2217886734 1.4939651925 0.1124794556  
C -3.1168018276 -0.4003740642 -0.4482293358  
H -2.2023700558 -1.2135351652 2.0508922669  
C -2.9613705187 0.948834386 -1.182960968  
C -4.0394213737 -0.1670602923 0.7631081374  
C -3.8142329767 -1.4033917976 -1.4004154477  
H -3.2204824 -1.5606081265 -2.3061559167  
H -4.8025889749 -1.0338057507 -1.6985489457  
H -3.9444416599 -2.3753419621 -0.9134190068  
H -4.9886156177 0.2629449994 0.427012875  
H -3.5945121909 0.5295684262 1.4814958295  
H -4.2697282467 -1.100048361 1.2867733431  
H -2.3109474297 0.8737273785 -2.0585814294  
H -2.5508504515 1.7150748328 -0.5206696247  
H -3.9399052103 1.295749466 -1.5330491071  
H -0.6081540927 1.4121176432 0.8285408012  
H -0.224026192 1.7303888655 -0.8565929578  
C 1.1456751734 2.6466121243 0.5486655953  
H 1.6272759712 2.3758276736 1.4966605608

|   |               |               |               |
|---|---------------|---------------|---------------|
| C | 0.4211446618  | 3.9917207103  | 0.7140800974  |
| H | 1.9572743167  | 2.7561773427  | -0.1849106132 |
| H | 1.1294509475  | 4.7272705899  | 1.1165147796  |
| H | -0.3678823196 | 3.8822279545  | 1.4711138676  |
| C | -0.1893200429 | 4.5414603666  | -0.5806361452 |
| H | -0.9834565816 | 3.8926554856  | -0.9638755689 |
| H | 0.5713929934  | 4.6314525442  | -1.3651366928 |
| H | -0.6243536237 | 5.5337935931  | -0.4228945849 |
| C | 3.0771913142  | -2.0083901033 | 0.093740048   |
| H | 2.3226479146  | -2.1437298119 | 2.1208253386  |
| H | 3.3234567622  | -0.747653785  | 1.8283847791  |
| H | 3.5751324167  | -2.9525222396 | 0.3482247423  |
| C | 4.079344705   | -1.1291549995 | -0.6695429718 |
| H | 2.2481395093  | -2.2833497495 | -0.5720922791 |
| C | 4.5126317366  | -1.742646943  | -2.0031557973 |
| H | 4.9592314558  | -0.9681980961 | -0.0321274695 |
| H | 3.6503421304  | -0.1349856305 | -0.840582206  |
| H | 5.2485294658  | -1.1150798451 | -2.5161917243 |
| H | 3.6552613308  | -1.8686355131 | -2.6745611109 |
| H | 4.9619360017  | -2.73155732   | -1.8554075597 |
| H | 4.9619360017  | -2.73155732   | -1.8554075597 |

TS endo 0662

E(RB3LYP) = -706.409508801 A.U.

First frequency = -533.5581  $\text{cm}^{-1}$

|   |               |               |               |
|---|---------------|---------------|---------------|
| H | -1.6187528686 | 0.3311014729  | -2.0295141141 |
| C | -1.1537905666 | -0.3990245869 | -1.3775396785 |
| H | -0.4084043268 | -1.0093453031 | -1.8713501041 |
| C | -1.8097195761 | -0.8676123342 | -0.2447057129 |
| C | -1.094652136  | -1.7295483753 | 0.617942695   |
| C | 0.1715230988  | -2.2108572984 | 0.3204293994  |
| H | 0.6991515638  | -2.802339749  | 1.0630851664  |
| H | 0.4191577826  | -2.4620136999 | -0.7047399082 |
| C | 1.5191887256  | -0.4741586437 | -0.0309398197 |
| H | 1.7529495272  | -0.4873740337 | 1.0299360878  |
| C | 2.5577242162  | -1.0806295956 | -0.9579768031 |
| C | 0.7303936769  | 0.5880839823  | -0.474632443  |



|   |               |               |               |
|---|---------------|---------------|---------------|
| H | 0.9061525037  | 0.9633270364  | -1.4795563056 |
| C | 0.1559905599  | 1.5429027296  | 0.5421004097  |
| C | -3.2239155917 | -0.4013473954 | 0.1681034347  |
| H | -1.4803810408 | -1.8929827941 | 1.6217738486  |
| C | -3.89444912   | 0.470666454   | -0.9095509275 |
| C | -3.2121702928 | 0.3914688844  | 1.4945399767  |
| C | -4.0967183655 | -1.6673375793 | 0.3530336207  |
| H | -5.1233124058 | -1.3881296196 | 0.6169831239  |
| H | -3.7108766915 | -2.3134386014 | 1.1466549579  |
| H | -4.1280922066 | -2.2556523332 | -0.5696898489 |
| H | -4.2372814662 | 0.6212164872  | 1.8072144924  |
| H | -2.6769028766 | 1.3381987368  | 1.3853049511  |
| H | -2.7386124692 | -0.1730540758 | 2.3028273248  |
| H | -3.3628924617 | 1.4136871475  | -1.0672168112 |
| H | -4.9149718015 | 0.7206800045  | -0.6009853016 |
| H | -3.9526615153 | -0.0526316701 | -1.8691419658 |
| H | 0.9749744067  | 1.9339314834  | 1.1628687692  |
| H | -0.4712606089 | 0.9631949772  | 1.232819321   |
| C | -0.646326157  | 2.72005145    | -0.0259676058 |
| H | -1.5123374798 | 2.3307380341  | -0.5711007506 |
| C | 0.1382807925  | 3.6617962968  | -0.955796766  |
| H | -1.0458039145 | 3.3067302238  | 0.8124644447  |
| H | -0.5409771584 | 4.4528950704  | -1.2981272252 |
| H | 0.4435245449  | 3.1210027676  | -1.8607891062 |
| C | 1.371371195   | 4.299751427   | -0.3072370416 |
| H | 1.8407012     | 5.0259028118  | -0.9789119148 |
| H | 2.1271652866  | 3.5490126761  | -0.0549362074 |
| H | 1.1033943764  | 4.8242262184  | 0.6175006457  |
| C | 3.3339164695  | -2.296298821  | -0.4202330786 |
| H | 3.2811867932  | -0.2967672234 | -1.2228196608 |
| H | 2.0770453517  | -1.3564275132 | -1.9080821382 |
| H | 2.6685984809  | -3.1637642716 | -0.3481575607 |
| C | 4.0189562346  | -2.0844324556 | 0.9403990443  |
| H | 4.0990542415  | -2.5620481192 | -1.1619510979 |
| C | 4.9734360206  | -0.8862320777 | 0.9796509508  |
| H | 4.5711937745  | -2.9979542122 | 1.1945240928  |
| H | 3.2587306812  | -1.969724612  | 1.7235248834  |
| H | 4.4375865986  | 0.058314772   | 0.8401974686  |

|   |              |               |              |
|---|--------------|---------------|--------------|
| H | 5.7295898827 | -0.958212491  | 0.1890671475 |
| H | 5.4979023114 | -0.8289622353 | 1.9388801282 |
| H | 5.4979023114 | -0.8289622353 | 1.9388801282 |

TS endo 0663

E(RB3LYP) = -706.409603400 A.U.

First frequency = -530.8905 cm<sup>-1</sup>

|   |               |               |               |
|---|---------------|---------------|---------------|
| H | -0.877958887  | 0.0739576938  | -2.0138898413 |
| C | -0.6731156082 | -0.568101482  | -1.1659821617 |
| H | 0.093497833   | -1.3063541695 | -1.3526487422 |
| C | -1.6265404063 | -0.7820154981 | -0.1776559295 |
| C | -1.2476721111 | -1.5399453518 | 0.953221211   |
| C | 0.0100482617  | -2.1073521492 | 1.0907994855  |
| H | 0.2712620347  | -2.5922010942 | 2.0278493062  |
| H | 0.5089949288  | -2.5269716247 | 0.2247492984  |
| C | 1.4949897788  | -0.5051150448 | 0.9651269301  |
| H | 1.2952297546  | -0.2400172288 | 2.0018138356  |
| C | 2.7488932707  | -1.3521024543 | 0.7871687547  |
| C | 1.0812490268  | 0.4334153588  | 0.0159245319  |
| H | 1.6170813641  | 0.4793570601  | -0.9284202647 |
| C | 0.433638038   | 1.7242476412  | 0.4676956193  |
| C | -3.0378006645 | -0.1550491136 | -0.2126811071 |
| H | -1.8953289423 | -1.5244535665 | 1.8262782613  |
| C | -3.2587620843 | 0.737172374   | -1.4469702647 |
| C | -3.3344600281 | 0.6898383596  | 1.0463516102  |
| C | -4.0539531358 | -1.3216946906 | -0.2779578044 |
| H | -3.9696923729 | -1.9733684227 | 0.5969249866  |
| H | -3.883914016  | -1.935440035  | -1.1685111067 |
| H | -5.0797705198 | -0.9367311541 | -0.3166690698 |
| H | -4.3575601465 | 1.0807009377  | 1.0058656559  |
| H | -2.6549172478 | 1.5419474851  | 1.1190947061  |
| H | -3.24387295   | 0.1068136764  | 1.9666727761  |
| H | -4.2833635898 | 1.1234994738  | -1.446400835  |
| H | -3.1139983858 | 0.1822491171  | -2.3791019063 |
| H | -2.5829394177 | 1.5971761256  | -1.4516059587 |
| H | 1.0858967384  | 2.2026463954  | 1.2159300126  |
| H | -0.496887045  | 1.4890327064  | 0.998910175   |

|   |               |               |               |
|---|---------------|---------------|---------------|
| C | 0.1893599152  | 2.7285512554  | -0.664497409  |
| H | 1.113470745   | 2.8193052302  | -1.2518605391 |
| C | -0.2291568219 | 4.1298779722  | -0.1958432395 |
| H | -0.5658437354 | 2.330267505   | -1.3518756927 |
| H | -0.2861710883 | 4.7900966123  | -1.0707305659 |
| H | 0.559991896   | 4.5443513646  | 0.4466032901  |
| C | -1.5660834038 | 4.1746829837  | 0.5518153806  |
| H | -1.524232097  | 3.6082483053  | 1.487550187   |
| H | -2.372742806  | 3.749975733   | -0.0563431315 |
| H | -1.8447602383 | 5.2031977415  | 0.803783171   |
| C | 3.081165752   | -1.7753234606 | -0.6508664363 |
| H | 2.6785298788  | -2.253827767  | 1.4105556806  |
| H | 3.5952129969  | -0.7813224884 | 1.1951616648  |
| H | 2.1997540526  | -2.2404663268 | -1.110128386  |
| C | 4.2604259775  | -2.7559634447 | -0.7491487713 |
| H | 3.3059326042  | -0.8876476012 | -1.2562800418 |
| C | 5.5987582035  | -2.1764157844 | -0.2766128418 |
| H | 4.3601269561  | -3.0812364337 | -1.7924186496 |
| H | 4.0271032554  | -3.659257288  | -0.1689960479 |
| H | 5.8446684032  | -1.2602370777 | -0.8263371062 |
| H | 6.4150421154  | -2.8888344441 | -0.4338700961 |
| H | 5.5810515412  | -1.9276839217 | 0.7891546397  |
| H | 5.5810515412  | -1.9276839217 | 0.7891546397  |

TS endo 0665

E(RB3LYP) = -706.407113061 A.U.

First frequency = -552.2517 cm<sup>-1</sup>

|   |               |               |               |
|---|---------------|---------------|---------------|
| H | -1.8327827842 | -1.3246141993 | -2.0108438437 |
| C | -1.2635641515 | -1.3246635188 | -1.0878178383 |
| H | -0.4538385696 | -2.0463794007 | -1.0864166138 |
| C | -1.873135872  | -0.9673892975 | 0.1170674633  |
| C | -1.0507388203 | -0.8940713369 | 1.2604865125  |
| C | 0.2932557615  | -1.2263650485 | 1.2447959272  |
| H | 0.8965224385  | -1.0310174962 | 2.1263855284  |
| H | 0.6491900185  | -2.0444618449 | 0.6304851783  |
| C | 1.2419046401  | -0.0153417149 | -0.4652931709 |
| H | 1.4466671979  | 0.7463350856  | 0.2773321047  |

|   |               |               |               |
|---|---------------|---------------|---------------|
| C | 2.4044247412  | -0.9266916076 | -0.8107354998 |
| C | 0.2442003511  | 0.2190464292  | -1.4184466798 |
| H | 0.4133696651  | -0.2410176228 | -2.39148085   |
| C | -0.5451956063 | 1.5230603671  | -1.4951353622 |
| C | -3.3499217188 | -0.5304524385 | 0.2183640108  |
| H | -1.4382438149 | -0.390253471  | 2.1432888389  |
| C | -3.5001289962 | 0.9009194461  | 0.781488383   |
| C | -4.0581051566 | -1.5185375632 | 1.1775499208  |
| C | -4.0738293105 | -0.5824513338 | -1.139215494  |
| H | -3.6315688553 | 0.1086677524  | -1.8646144642 |
| H | -5.1229802003 | -0.2965416063 | -1.0109094427 |
| H | -4.0531430008 | -1.5881713488 | -1.5706883142 |
| H | -3.9818391728 | -2.544893257  | 0.8042141687  |
| H | -5.1205765284 | -1.2662565926 | 1.2749571529  |
| H | -3.6119962278 | -1.4933308193 | 2.1762595733  |
| H | -3.0667864046 | 1.6392456144  | 0.1029730643  |
| H | -3.0139545439 | 1.015579764   | 1.7539120703  |
| H | -4.5604828882 | 1.1450924304  | 0.912597713   |
| H | -1.6008781684 | 1.2977927374  | -1.6754004576 |
| H | -0.2075010051 | 2.0648191471  | -2.3919184726 |
| C | -0.4286192022 | 2.4708038792  | -0.2872542884 |
| H | -1.3118335802 | 3.1217681862  | -0.2587575094 |
| C | 0.817999062   | 3.3675250897  | -0.3112081251 |
| H | -0.4611301326 | 1.8895188953  | 0.6422330522  |
| H | 0.7603438163  | 4.0256104913  | -1.1889564361 |
| H | 1.7172610481  | 2.7573999842  | -0.4550423171 |
| C | 0.9638213085  | 4.2107043239  | 0.9580922098  |
| H | 1.8405674126  | 4.864884409   | 0.911139771   |
| H | 1.0703150186  | 3.5722196807  | 1.8428493368  |
| H | 0.0826163822  | 4.8436184082  | 1.1150819336  |
| C | 3.4620860639  | -1.066278409  | 0.2892482313  |
| H | 2.8981372861  | -0.5433701624 | -1.7166051373 |
| H | 2.0292225575  | -1.9238278    | -1.0918772376 |
| H | 3.8126870995  | -0.0644393452 | 0.5759806051  |
| C | 4.6619935847  | -1.9207067116 | -0.1331812538 |
| H | 3.0127801696  | -1.4991765004 | 1.1908175227  |
| C | 5.7174529029  | -2.0534733141 | 0.9682716709  |
| H | 5.1195530979  | -1.4849615134 | -1.0318351694 |

|   |              |               |               |
|---|--------------|---------------|---------------|
| H | 4.3083946813 | -2.918749371  | -0.4264292001 |
| H | 6.1089280517 | -1.0717554869 | 1.2586302933  |
| H | 6.5637994179 | -2.667522604  | 0.6438372444  |
| H | 5.2932674998 | -2.5171905649 | 1.866247653   |
| H | 5.2932674998 | -2.5171905649 | 1.866247653   |

TS endo 0671

E(RB3LYP) = -706.407096773 A.U.

First frequency = -545.5464  $\text{cm}^{-1}$

|   |               |               |               |
|---|---------------|---------------|---------------|
| H | -1.3364329797 | -0.95849788   | -2.1476483126 |
| C | -1.1178456348 | -1.3175664261 | -1.1482459298 |
| H | -0.5811213304 | -2.2586215004 | -1.1392725132 |
| C | -1.9506838958 | -0.9867788335 | -0.0777651191 |
| C | -1.5436151517 | -1.3973673114 | 1.2092456821  |
| C | -0.3982970713 | -2.1468861658 | 1.4224336729  |
| H | -0.0565060081 | -2.329875249  | 2.4376957735  |
| H | -0.1152370853 | -2.9156357365 | 0.7135200366  |
| C | 1.3191227131  | -1.0438315756 | 0.4548918538  |
| H | 1.441433433   | -0.4809076604 | 1.3739719872  |
| C | 2.2709368814  | -2.2113278999 | 0.2881233562  |
| C | 0.8146902593  | -0.3733824918 | -0.6691104706 |
| H | 1.1572781137  | -0.7474361859 | -1.6322747318 |
| C | 0.521047108   | 1.1218818946  | -0.6730050838 |
| C | -3.2112197482 | -0.1095816011 | -0.23346811   |
| H | -2.0335094978 | -0.9545560659 | 2.0735394295  |
| C | -3.4415839125 | 0.33730826    | -1.688518111  |
| C | -3.1605260187 | 1.1591168834  | 0.6457975966  |
| C | -4.4222612434 | -0.969906431  | 0.2038199357  |
| H | -5.3553364487 | -0.4044684493 | 0.0959602027  |
| H | -4.3330917407 | -1.2795432044 | 1.249455793   |
| H | -4.4968799683 | -1.8754677571 | -0.4068510301 |
| H | -2.3625671415 | 1.8291178374  | 0.3193173606  |
| H | -2.9943452238 | 0.9263990863  | 1.701030234   |
| H | -4.1077913592 | 1.7056900936  | 0.5752559042  |
| H | -4.3593715248 | 0.9310066381  | -1.7527754703 |
| H | -3.5506985241 | -0.517537863  | -2.3632161749 |
| H | -2.6200698067 | 0.960836376   | -2.0573037429 |

|   |               |               |               |
|---|---------------|---------------|---------------|
| H | -0.4022022504 | 1.327392241   | -1.227948241  |
| H | 1.3224458851  | 1.6048890701  | -1.2498427295 |
| C | 0.426513266   | 1.7933709473  | 0.7033822166  |
| H | -0.3280303702 | 1.2733371807  | 1.3029749014  |
| C | 0.0948132293  | 3.2921138624  | 0.6352748955  |
| H | 1.3778783603  | 1.6753003497  | 1.2387387904  |
| H | -0.095676604  | 3.6564513595  | 1.6526373276  |
| H | -0.8417745834 | 3.4384896978  | 0.0804096265  |
| C | 1.1982968677  | 4.1450347684  | -0.0026472767 |
| H | 1.3599716054  | 3.8831722507  | -1.0530694186 |
| H | 2.1511817118  | 4.007274447   | 0.5217291489  |
| H | 0.9470563143  | 5.2099978636  | 0.0347188093  |
| C | 3.7724601002  | -1.8418145675 | 0.2894239052  |
| H | 2.0376488178  | -2.7305653367 | -0.6526443278 |
| H | 2.1205905602  | -2.9473699128 | 1.088068789   |
| H | 4.037288469   | -1.4283990688 | 1.2724376796  |
| C | 4.232522355   | -0.8646521075 | -0.812598392  |
| H | 4.3328519152  | -2.7812843078 | 0.2000670775  |
| C | 4.2216024095  | 0.6079413831  | -0.385624242  |
| H | 3.6045538429  | -0.9973310343 | -1.7030550318 |
| H | 5.2513720727  | -1.1280158589 | -1.1226747648 |
| H | 3.2321315925  | 0.9170878922  | -0.0428195315 |
| H | 4.5140517255  | 1.2667501852  | -1.2104457786 |
| H | 4.9236369083  | 0.7756910279  | 0.4393081379  |
| H | 4.9236369083  | 0.7756910279  | 0.4393081379  |

TS endo 0672

E(RB3LYP) = -706.408981479 A.U.

First frequency = -518.6171  $\text{cm}^{-1}$

|   |               |               |               |
|---|---------------|---------------|---------------|
| H | -0.9456189573 | -0.0298532148 | -1.9885228585 |
| C | -0.6620449658 | -0.6565806343 | -1.1512561753 |
| H | 0.238301149   | -1.2308169848 | -1.3228709546 |
| C | -1.6123444947 | -1.1244926791 | -0.2491002405 |
| C | -1.1444935009 | -1.8335401311 | 0.8805012831  |
| C | 0.1991979339  | -2.0718212549 | 1.1105297332  |
| H | 0.511349758   | -2.5151747808 | 2.0522673513  |
| H | 0.8760908028  | -2.2536871884 | 0.2863654017  |

|   |               |               |               |
|---|---------------|---------------|---------------|
| C | 1.1928628181  | -0.0514940773 | 1.1469930904  |
| H | 0.7350733787  | 0.1184811987  | 2.1193261387  |
| C | 2.66201142    | -0.4498253926 | 1.252946182   |
| C | 0.6464795573  | 0.6904805087  | 0.0943815136  |
| H | 1.2728614134  | 0.8723107342  | -0.7749399933 |
| C | -0.3680983072 | 1.7707136927  | 0.4040629942  |
| C | -3.1149560213 | -0.7892315689 | -0.359350121  |
| H | -1.8392874702 | -2.0248004271 | 1.6947471802  |
| C | -3.6535550539 | -0.0808557265 | 0.9047633083  |
| C | -3.8723191688 | -2.1275798431 | -0.5391189737 |
| C | -3.4278617718 | 0.1074169637  | -1.5706481222 |
| H | -3.1268500137 | -0.3632271533 | -2.5118239737 |
| H | -2.9247130668 | 1.0770286689  | -1.4959396731 |
| H | -4.504985333  | 0.2968931824  | -1.6236908425 |
| H | -3.7162514182 | -2.791977149  | 0.3162253577  |
| H | -3.5269075035 | -2.651816691  | -1.436008994  |
| H | -4.9496611664 | -1.9503018189 | -0.6379569687 |
| H | -3.4828007604 | -0.6661479553 | 1.8121693562  |
| H | -4.7342126912 | 0.0778649121  | 0.8151245771  |
| H | -3.1826741521 | 0.8965911617  | 1.040847352   |
| H | -1.1156422169 | 1.3596404162  | 1.0911455623  |
| H | -0.9087261483 | 2.0617192875  | -0.5030336225 |
| C | 0.2597423525  | 3.0215281852  | 1.0552285569  |
| H | -0.5356651087 | 3.7578370464  | 1.2384838675  |
| C | 1.3788508436  | 3.6827147081  | 0.2352052931  |
| H | 0.6601766207  | 2.7420560876  | 2.0382497832  |
| H | 2.2230185612  | 2.9864063109  | 0.1489058593  |
| H | 1.7566009253  | 4.5495399389  | 0.7920857974  |
| C | 0.9447766907  | 4.1308906309  | -1.1644889073 |
| H | 0.6603780857  | 3.2788010614  | -1.7909777295 |
| H | 1.7518593835  | 4.6621209366  | -1.6794129427 |
| H | 0.0809047504  | 4.8040496106  | -1.1131492753 |
| C | 3.5308766134  | -0.3621253972 | -0.0129604945 |
| H | 2.7595455168  | -1.4498351976 | 1.6939929123  |
| H | 3.1076807258  | 0.2275895503  | 1.9964750836  |
| H | 3.443548111   | 0.64664329    | -0.4355422914 |
| C | 3.249099159   | -1.3980082612 | -1.1127204218 |
| H | 4.5800351159  | -0.4670290613 | 0.2948665382  |

|   |              |               |               |
|---|--------------|---------------|---------------|
| C | 3.5701580602 | -2.8413374749 | -0.7086380756 |
| H | 3.8463533549 | -1.137138958  | -1.9957166327 |
| H | 2.2032534006 | -1.3271650708 | -1.4318500097 |
| H | 4.6218450413 | -2.9387389448 | -0.4153295511 |
| H | 3.3886163011 | -3.533601246  | -1.537110238  |
| H | 2.9621266281 | -3.1762475009 | 0.1373963869  |
| H | 2.9621266281 | -3.1762475009 | 0.1373963869  |

TS endo 0675

E(RB3LYP) = -706.408400113 A.U.

First frequency = -547.0178 cm<sup>-1</sup>

|   |               |               |               |
|---|---------------|---------------|---------------|
| H | -1.4693546206 | 0.4289346839  | -1.9299933596 |
| C | -1.0657978095 | -0.3602193682 | -1.3059863312 |
| H | -0.382652558  | -1.0164448601 | -1.8318440725 |
| C | -1.7752523163 | -0.8262552749 | -0.2015012307 |
| C | -1.1409772644 | -1.776235398  | 0.6289989367  |
| C | 0.0868386241  | -2.3459304512 | 0.3242747439  |
| H | 0.5571456435  | -2.9982390891 | 1.054650478   |
| H | 0.3280882545  | -2.5872510617 | -0.7042564052 |
| C | 1.5674250181  | -0.6930328543 | -0.0118021773 |
| H | 1.8229254647  | -0.8009217377 | 1.03719717    |
| C | 2.5027489229  | -1.3487104792 | -1.013907704  |
| C | 0.8409662101  | 0.4431846055  | -0.3734717453 |
| H | 1.0413496736  | 0.8794351437  | -1.3492420267 |
| C | 0.3490845491  | 1.3683974871  | 0.7137194812  |
| C | -3.1538692441 | -0.2675929386 | 0.2164168927  |
| H | -1.5516620773 | -1.9501237952 | 1.6212436719  |
| C | -3.1042068408 | 0.4479415322  | 1.585266313   |
| C | -4.1292493886 | -1.4665667744 | 0.3169176543  |
| C | -3.7306034742 | 0.7153470587  | -0.8191992058 |
| H | -3.8150749058 | 0.2529838705  | -1.807711291  |
| H | -3.1199112809 | 1.6178669236  | -0.9149849917 |
| H | -4.7324610846 | 1.0319561369  | -0.510591883  |
| H | -5.1349532302 | -1.1200971878 | 0.5817131526  |
| H | -3.8106302316 | -2.1846096522 | 1.0779583729  |
| H | -4.1904316664 | -1.9985424657 | -0.6379658741 |
| H | -2.4927013328 | 1.3524884722  | 1.5364347139  |



|   |               |               |               |
|---|---------------|---------------|---------------|
| H | -2.693723714  | -0.1957944237 | 2.3683639983  |
| H | -4.1135055595 | 0.7429572793  | 1.8945216779  |
| H | 1.2032120945  | 1.6614334818  | 1.3435874751  |
| H | -0.3125140048 | 0.7904837753  | 1.3725674977  |
| C | -0.3563893111 | 2.6386056628  | 0.2267534786  |
| H | -1.1732502254 | 2.3624626514  | -0.4498007366 |
| C | 0.5680218627  | 3.6369841631  | -0.4824370358 |
| H | -0.8242513706 | 3.1421487662  | 1.083466978   |
| H | 1.0463585782  | 3.1542675468  | -1.3441802571 |
| H | 1.3834374945  | 3.9178450936  | 0.1980550463  |
| C | -0.170284389  | 4.8937552042  | -0.9517590801 |
| H | -0.9699031913 | 4.6392199655  | -1.6570427381 |
| H | 0.504538147   | 5.5961874051  | -1.4516914319 |
| H | -0.6322991519 | 5.4176870244  | -0.1070673777 |
| C | 3.388044941   | -2.4802074557 | -0.4556929959 |
| H | 3.1539892405  | -0.5812529822 | -1.4579329721 |
| H | 1.9076855756  | -1.7326086505 | -1.856086973  |
| H | 2.8186237632  | -3.0624541043 | 0.2796922025  |
| C | 4.710763245   | -2.0119466734 | 0.1753789398  |
| H | 3.6315751662  | -3.1751171215 | -1.2685603899 |
| C | 4.5657651416  | -1.0883946375 | 1.389847428   |
| H | 5.3066099672  | -1.5019712989 | -0.5942024539 |
| H | 5.2885886113  | -2.8985153834 | 0.4672516809  |
| H | 4.0838582532  | -0.1429080056 | 1.122945445   |
| H | 5.5442202993  | -0.8513526642 | 1.8206485941  |
| H | 3.9615752171  | -1.558657857  | 2.1745841936  |
| H | 3.9615752171  | -1.558657857  | 2.1745841936  |

TS endo 0680

E(RB3LYP) = -706.405973807 A.U.

First frequency = -545.9239  $\text{cm}^{-1}$

|   |               |               |               |
|---|---------------|---------------|---------------|
| H | -1.9120069923 | -1.1198996899 | -2.2132140492 |
| C | -1.4377052534 | -1.3670001957 | -1.270228491  |
| H | -0.7726998238 | -2.2198971865 | -1.3328618174 |
| C | -2.0542418684 | -1.0538864033 | -0.0591886351 |
| C | -1.3260000579 | -1.3022702539 | 1.1233016039  |
| C | -0.0630324204 | -1.8725159149 | 1.1125277217  |

|   |               |               |               |
|---|---------------|---------------|---------------|
| H | 0.5075331465  | -1.9285776801 | 2.0360441465  |
| H | 0.1723160019  | -2.6542232905 | 0.3999525636  |
| C | 1.2013351367  | -0.6137266969 | -0.2350768656 |
| H | 1.4054467151  | 0.0321502765  | 0.6090615994  |
| C | 2.2776850032  | -1.6354523355 | -0.5546207073 |
| C | 0.4024646275  | -0.1091222215 | -1.2706960674 |
| H | 0.6069822005  | -0.514733705  | -2.260567049  |
| C | -0.1488236008 | 1.3155794059  | -1.2965539707 |
| C | -3.4128364443 | -0.3267113015 | 0.032231797   |
| H | -1.6764980154 | -0.8557749109 | 2.0510262641  |
| C | -4.3804788795 | -1.2488210691 | 0.8134126335  |
| C | -4.0285401002 | -0.0533815108 | -1.3519259178 |
| C | -3.301049962  | 1.022461454   | 0.7781215856  |
| H | -4.2919123432 | 1.4788211404  | 0.8836587497  |
| H | -2.6641198533 | 1.7233963773  | 0.2335010462  |
| H | -2.8848309526 | 0.9050431177  | 1.7822290077  |
| H | -5.0050344406 | 0.4279585602  | -1.2347059824 |
| H | -4.1784591159 | -0.9784693864 | -1.917440861  |
| H | -3.4033506236 | 0.6155274525  | -1.9528428185 |
| H | -5.3704144841 | -0.785281578  | 0.897345386   |
| H | -4.0139180406 | -1.4469035171 | 1.8250460722  |
| H | -4.4945114519 | -2.2120333559 | 0.3056436181  |
| H | -1.218326313  | 1.2955831202  | -1.5245815574 |
| H | 0.3183732805  | 1.8365637474  | -2.1461485061 |
| C | 0.0837172027  | 2.1600196565  | -0.0318732934 |
| H | -0.6462288805 | 2.9792336356  | -0.0053121231 |
| C | 1.4937268546  | 2.7634461985  | 0.0456331947  |
| H | -0.1223423229 | 1.5551016483  | 0.8598513047  |
| H | 1.5916695773  | 3.529061588   | -0.7357716991 |
| H | 2.2342429395  | 1.9937621342  | -0.1977745237 |
| C | 1.8140088015  | 3.3706297267  | 1.412887689   |
| H | 2.8090538027  | 3.8274681576  | 1.4301823734  |
| H | 1.7860343783  | 2.6041869954  | 2.1961875036  |
| H | 1.0861876835  | 4.1443434315  | 1.6835242103  |
| C | 3.6329473993  | -1.0148056505 | -0.9863388139 |
| H | 1.905312461   | -2.282262446  | -1.3600634445 |
| H | 2.4601358069  | -2.2970968    | 0.3021252479  |
| H | 4.0994038367  | -1.665924646  | -1.7365963521 |

|   |              |               |               |
|---|--------------|---------------|---------------|
| C | 4.6403855126 | -0.8233247534 | 0.1598898306  |
| H | 3.4487156672 | -0.0554594897 | -1.4866003747 |
| C | 4.1740378515 | 0.0909588765  | 1.297730871   |
| H | 5.5748440869 | -0.4269366345 | -0.2581490632 |
| H | 4.8889086062 | -1.8101962012 | 0.574421612   |
| H | 4.9570303018 | 0.2046071385  | 2.054778174   |
| H | 3.2891119734 | -0.3117718778 | 1.8010512998  |
| H | 3.9202611542 | 1.0901424411  | 0.9292948378  |
| H | 3.9202611542 | 1.0901424411  | 0.9292948378  |

TS endo 0683

E(RB3LYP) = -706.407039401 A.U.

First frequency = -551.5531 cm<sup>-1</sup>

|   |               |               |               |
|---|---------------|---------------|---------------|
| H | -2.0758171197 | -1.3334805506 | -2.0019017879 |
| C | -1.4633736576 | -1.4148171543 | -1.1107206112 |
| H | -0.7467213504 | -2.2276648371 | -1.158408196  |
| C | -1.9617753948 | -1.005118159  | 0.1282279584  |
| C | -1.078530475  | -1.048688271  | 1.2268975342  |
| C | 0.2136252847  | -1.5378354051 | 1.13694195    |
| H | 0.87963271    | -1.4302679585 | 1.9880548727  |
| H | 0.4391900931  | -2.3813044026 | 0.4960399441  |
| C | 1.2039111321  | -0.4113639705 | -0.6062273698 |
| H | 1.5097223867  | 0.3139600081  | 0.135132568   |
| C | 2.2459764287  | -1.4378052162 | -1.0117625155 |
| C | 0.1967449935  | -0.0562000477 | -1.5105853615 |
| H | 0.2687208134  | -0.5202364331 | -2.493797153  |
| C | -0.4384380861 | 1.3321148693  | -1.5403651231 |
| C | -3.3664022218 | -0.392544283  | 0.3122455252  |
| H | -1.3570449387 | -0.5169621759 | 2.1340983355  |
| C | -3.3090055402 | 1.0376573236  | 0.8954960598  |
| C | -4.1405213054 | -1.300712511  | 1.2990275167  |
| C | -4.1607893924 | -0.3344371643 | -1.0050978687 |
| H | -3.6756830975 | 0.3088966465  | -1.7468490999 |
| H | -5.1589144978 | 0.0751051654  | -0.818158608  |
| H | -4.2860173396 | -1.3282898387 | -1.4463086775 |
| H | -3.6429116702 | -1.3470444264 | 2.2723224132  |
| H | -4.2122585653 | -2.3224609353 | 0.912393892   |

|   |               |               |               |
|---|---------------|---------------|---------------|
| H | -5.1567613222 | -0.9205881141 | 1.456294033   |
| H | -2.7669704535 | 1.07547542    | 1.8441486228  |
| H | -4.3229294893 | 1.4101735465  | 1.0808338889  |
| H | -2.8188859689 | 1.7269000974  | 0.2039950174  |
| H | -1.5232308505 | 1.2356427487  | -1.6468941782 |
| H | -0.1000182467 | 1.833625211   | -2.4598750961 |
| C | -0.1263183362 | 2.2534240156  | -0.3471866077 |
| H | -0.9106156351 | 3.0175676867  | -0.2717340574 |
| C | 1.2279177654  | 2.9717388194  | -0.4481906854 |
| H | -0.1841074896 | 1.6799141912  | 0.5860845345  |
| H | 1.2015201147  | 3.6511727855  | -1.310943883  |
| H | 2.022312492   | 2.2477310653  | -0.663559781  |
| C | 1.5774744841  | 3.7566372286  | 0.8186371085  |
| H | 0.8040695605  | 4.4979990674  | 1.0509151123  |
| H | 2.5293291903  | 4.2878906979  | 0.7159289815  |
| H | 1.6600117153  | 3.0877065777  | 1.6833842769  |
| C | 3.3572093779  | -1.68988818   | 0.0179465782  |
| H | 2.7182424229  | -1.1115604929 | -1.9508057873 |
| H | 1.7495457792  | -2.3890465461 | -1.257794098  |
| H | 2.921881468   | -2.0299879665 | 0.9654014186  |
| C | 4.2498993641  | -0.4694032962 | 0.2811836845  |
| H | 3.9879936125  | -2.5145875058 | -0.3397203511 |
| C | 5.3770558851  | -0.7647119644 | 1.2748428784  |
| H | 3.6442816506  | 0.3635760053  | 0.6598573098  |
| H | 4.6759657344  | -0.1248237284 | -0.671133552  |
| H | 4.9740346846  | -1.081941142  | 2.243567221   |
| H | 6.0037348199  | 0.1163565551  | 1.4469845839  |
| H | 6.0248637343  | -1.5696052277 | 0.9089415385  |
| H | 6.0248637343  | -1.5696052277 | 0.9089415385  |

TS endo 0687

E(RB3LYP) = -706.407314376 A.U.

First frequency = -546.7027 cm<sup>-1</sup>

|   |               |               |               |
|---|---------------|---------------|---------------|
| H | -1.3172502705 | -0.5942398791 | -2.2491084638 |
| C | -0.8796350246 | -0.901672462  | -1.3057682735 |
| H | -0.1000308457 | -1.6469779806 | -1.4209320648 |
| C | -1.6394164649 | -0.8752862433 | -0.1340672761 |

|   |               |               |               |
|---|---------------|---------------|---------------|
| C | -0.9799710774 | -1.1973171278 | 1.0712851308  |
| C | 0.3418622023  | -1.603288513  | 1.123294531   |
| H | 0.8238888491  | -1.7161381254 | 2.0897091001  |
| H | 0.7570116469  | -2.2239963525 | 0.3389308607  |
| C | 1.5692398824  | -0.0138140495 | -0.0330639508 |
| H | 1.6995910241  | 0.4953748048  | 0.915061519   |
| C | 2.7285356658  | -0.8796607987 | -0.4870180761 |
| C | 0.7145812167  | 0.5472185693  | -0.9880451748 |
| H | 0.9923862262  | 0.3659090333  | -2.026012292  |
| C | 0.0207451493  | 1.8873166114  | -0.7780298048 |
| C | -3.11033385   | -0.4101946932 | -0.0957724617 |
| H | -1.4719172969 | -0.9508573441 | 2.0097139369  |
| C | -3.6292547831 | 0.0170765366  | -1.4807209899 |
| C | -3.3305165274 | 0.7715587718  | 0.8740192836  |
| C | -3.9576422368 | -1.6134814126 | 0.3862814307  |
| H | -3.6594354775 | -1.9323866597 | 1.3895632954  |
| H | -3.8355844482 | -2.469171401  | -0.2856358451 |
| H | -5.0211666379 | -1.3487383682 | 0.4163471245  |
| H | -2.8013761481 | 1.6626006011  | 0.5302675945  |
| H | -2.9876132517 | 0.5467779635  | 1.8874847091  |
| H | -4.3969823776 | 1.0163026548  | 0.9352761917  |
| H | -3.0719244932 | 0.8724406788  | -1.8773604389 |
| H | -4.680396618  | 0.314648871   | -1.4068923307 |
| H | -3.5654392616 | -0.7986439505 | -2.2076527528 |
| H | -0.9917863813 | 1.8575687531  | -1.1993520711 |
| H | 0.5662686837  | 2.630499115   | -1.3770987596 |
| C | -0.0621415516 | 2.3828074418  | 0.6720424152  |
| H | -0.5425246603 | 1.6130533354  | 1.284989758   |
| C | -0.8149725884 | 3.7135414696  | 0.8284183299  |
| H | 0.9516956867  | 2.5097109905  | 1.0739110371  |
| H | -0.9512700893 | 3.9156757171  | 1.8983502525  |
| H | -1.8248816537 | 3.6181546262  | 0.4075031145  |
| C | -0.1107214986 | 4.9114901884  | 0.1799245294  |
| H | -0.6531969243 | 5.8423078538  | 0.3750655625  |
| H | -0.0327757689 | 4.7995721762  | -0.9061901207 |
| H | 0.9056865274  | 5.0283880918  | 0.5739039749  |
| C | 3.6124090474  | -1.4143747891 | 0.6470402509  |
| H | 3.3643999102  | -0.293612135  | -1.1688628954 |

|   |              |               |               |
|---|--------------|---------------|---------------|
| H | 2.3470909049 | -1.7114469953 | -1.0979518246 |
| H | 3.9265257837 | -0.5661489165 | 1.2701907698  |
| C | 4.8590877008 | -2.1709231764 | 0.1644628739  |
| H | 3.0263609253 | -2.0718054467 | 1.3002292612  |
| C | 4.5466071978 | -3.4707788847 | -0.5862907553 |
| H | 5.488673953  | -2.4025900426 | 1.0328738296  |
| H | 5.4577442222 | -1.5111385042 | -0.4786224887 |
| H | 3.9327322613 | -4.1396104356 | 0.0284854802  |
| H | 5.4641023818 | -4.0074253575 | -0.8487175687 |
| H | 3.9999000558 | -3.2826278938 | -1.5158675315 |
| H | 3.9999000558 | -3.2826278938 | -1.5158675315 |

TS endo 0690

E(RB3LYP) = -706.408968804 A.U.

First frequency = -539.5195  $\text{cm}^{-1}$

|   |               |               |               |
|---|---------------|---------------|---------------|
| H | -0.4615293029 | 0.0325709619  | -1.8847500274 |
| C | -0.4677574541 | -0.6715145558 | -1.0615256497 |
| H | 0.2474915113  | -1.4739030074 | -1.170870004  |
| C | -1.5994499033 | -0.8470473147 | -0.2726257199 |
| C | -1.4900577017 | -1.6983075436 | 0.8484547183  |
| C | -0.3293103692 | -2.4052763047 | 1.1375168437  |
| H | -0.276851003  | -2.977682308  | 2.060218177   |
| H | 0.249656405   | -2.8323119887 | 0.3252670802  |
| C | 1.315347406   | -1.0134261846 | 1.3771717647  |
| H | 1.0038844666  | -0.8287508797 | 2.4039773487  |
| C | 2.4921413943  | -1.9786648494 | 1.2753056848  |
| C | 1.1116099617  | 0.0577826131  | 0.4991891667  |
| H | 1.7766362216  | 0.1818887214  | -0.3491102628 |
| C | 0.4641504421  | 1.312489343   | 1.0352359576  |
| C | -2.91602228   | -0.07016789   | -0.498036691  |
| H | -2.2688954359 | -1.6614041079 | 1.606649735   |
| C | -2.9025947881 | 0.7467503049  | -1.8034783101 |
| C | -3.2254414703 | 0.8916387862  | 0.6701768282  |
| C | -4.0604354803 | -1.1074573203 | -0.6086555144 |
| H | -4.1692162895 | -1.6920888085 | 0.309177342   |
| H | -3.872211694  | -1.8073325895 | -1.4291594787 |
| H | -5.0148230704 | -0.6034412947 | -0.799930982  |

|   |               |               |               |
|---|---------------|---------------|---------------|
| H | -4.2063843066 | 1.3597565072  | 0.5286629256  |
| H | -2.4803454261 | 1.6890064306  | 0.7282513374  |
| H | -3.2401561036 | 0.3731884351  | 1.6330803894  |
| H | -2.701814421  | 0.1117185625  | -2.6720327467 |
| H | -2.1536363318 | 1.5439479236  | -1.7834640582 |
| H | -3.8779471377 | 1.2217494612  | -1.9527236268 |
| H | 1.0761530685  | 1.6912737451  | 1.8693292048  |
| H | -0.5019017818 | 1.0432876994  | 1.4843860188  |
| C | 0.284399929   | 2.4397188263  | 0.0179243229  |
| H | 1.2484243064  | 2.6459584385  | -0.4690349089 |
| C | -0.2548728145 | 3.7357881051  | 0.6323158221  |
| H | -0.389611152  | 2.1066072918  | -0.7782018237 |
| H | 0.4468230842  | 4.0944945669  | 1.3974878944  |
| H | -1.1944053049 | 3.5258063422  | 1.1612049817  |
| C | -0.4905730331 | 4.8331558741  | -0.4090611494 |
| H | 0.4371467547  | 5.0806421076  | -0.9377179124 |
| H | -0.8686355342 | 5.752232345   | 0.0503060501  |
| H | -1.22091868   | 4.5100782509  | -1.159945024  |
| C | 3.0914712571  | -2.1937002994 | -0.1292554968 |
| H | 2.1972202199  | -2.9476583458 | 1.6956794466  |
| H | 3.2885107122  | -1.6112192649 | 1.9403792193  |
| H | 3.5021875604  | -3.2091064203 | -0.1952080974 |
| C | 4.2071470291  | -1.2030251531 | -0.4949519037 |
| H | 2.2991385682  | -2.1478908418 | -0.8878396866 |
| C | 4.7004494206  | -1.3700512618 | -1.9342306963 |
| H | 5.0436037888  | -1.3447608568 | 0.2026789618  |
| H | 3.8611700287  | -0.1745569872 | -0.3393752386 |
| H | 3.8910741435  | -1.186761092  | -2.6504683786 |
| H | 5.0699420586  | -2.3871097555 | -2.1094200416 |
| H | 5.5141156819  | -0.6749925454 | -2.1653475297 |
| H | 5.5141156819  | -0.6749925454 | -2.1653475297 |

TS endo 0693

E(RB3LYP) = -706.407117345 A.U.

First frequency = -498.8533  $\text{cm}^{-1}$

|   |               |               |               |
|---|---------------|---------------|---------------|
| H | -2.1048701738 | -0.2494554302 | -2.0264776527 |
| C | -1.4593165424 | -0.7963323446 | -1.3457914061 |

|   |               |               |               |
|---|---------------|---------------|---------------|
| H | -0.7064307398 | -1.3928869461 | -1.8452248972 |
| C | -1.9077070106 | -1.138921251  | -0.0745187786 |
| C | -0.984093927  | -1.7538228986 | 0.8028703508  |
| C | 0.295214046   | -2.1137305839 | 0.4196633297  |
| H | 0.9860687959  | -2.492051925  | 1.1658871819  |
| H | 0.4938027727  | -2.452724664  | -0.5900458248 |
| C | 1.3068628649  | -0.2039992736 | -0.3701922393 |
| H | 1.5965935875  | -0.0002798041 | 0.6546811356  |
| C | 2.3677219618  | -0.7997094568 | -1.275683457  |
| C | 0.2963108484  | 0.5895402658  | -0.9064876775 |
| H | 0.3197911942  | 0.7740162624  | -1.9784762684 |
| C | -0.354740703  | 1.6486973407  | -0.0476564488 |
| C | -3.3406928967 | -0.7796053196 | 0.3771986791  |
| H | -1.2177555149 | -1.7949503177 | 1.8617545238  |
| C | -3.7239736502 | 0.675687592   | 0.0330892656  |
| C | -3.5522064399 | -0.9714431473 | 1.8910869716  |
| C | -4.3046646723 | -1.7346448096 | -0.3698026217 |
| H | -5.3435642368 | -1.5504634518 | -0.0712341085 |
| H | -4.0649527283 | -2.7799457295 | -0.1491083125 |
| H | -4.230660238  | -1.5965043922 | -1.4529125328 |
| H | -2.8861924606 | -0.3288024526 | 2.4766055619  |
| H | -3.3867874558 | -2.0085923581 | 2.1987920949  |
| H | -4.5823398568 | -0.711601738  | 2.1558727265  |
| H | -4.7772959515 | 0.8504610237  | 0.2789975603  |
| H | -3.5968873421 | 0.9001053298  | -1.0293649873 |
| H | -3.1230291682 | 1.3879461341  | 0.6035439262  |
| H | -0.7217229142 | 1.1707717337  | 0.8704251817  |
| H | -1.2313461346 | 2.0580952484  | -0.560723903  |
| C | 0.5901594099  | 2.8059021053  | 0.3341222815  |
| H | 0.0567898679  | 3.4935411432  | 1.0056289485  |
| C | 1.125100881   | 3.590973982   | -0.8687275368 |
| H | 1.4375257216  | 2.408689078   | 0.9090965624  |
| H | 0.2783439065  | 3.9672472356  | -1.4597484882 |
| H | 1.6772683297  | 2.9087908637  | -1.5277252355 |
| C | 2.030767693   | 4.7570528576  | -0.463712823  |
| H | 2.4029275972  | 5.3022435996  | -1.3373917278 |
| H | 2.899397641   | 4.4010743766  | 0.1023159685  |
| H | 1.4947351486  | 5.4711471826  | 0.1721132149  |



|   |              |               |               |
|---|--------------|---------------|---------------|
| C | 3.4021960877 | -1.7445506543 | -0.6399320557 |
| H | 2.922444101  | 0.0301353169  | -1.7404286871 |
| H | 1.8736478241 | -1.3173626077 | -2.1115439924 |
| H | 2.9149754058 | -2.6570550839 | -0.2771663412 |
| C | 4.2449895056 | -1.1250554641 | 0.4989041725  |
| H | 4.0750165429 | -2.0669710994 | -1.4438983439 |
| C | 3.7127991878 | -1.3913216919 | 1.9134007043  |
| H | 4.3365330565 | -0.0426259175 | 0.3359340407  |
| H | 5.265940525  | -1.5219695649 | 0.4424427556  |
| H | 3.6538646021 | -2.4686012685 | 2.1074697659  |
| H | 2.7118123867 | -0.9791003456 | 2.0660310471  |
| H | 4.3707630816 | -0.953375788  | 2.671550767   |
| H | 4.3707630816 | -0.953375788  | 2.671550767   |

TS endo 0694

E(RB3LYP) = -706.407232033 A.U.

First frequency = -512.9697 cm<sup>-1</sup>

|   |               |               |               |
|---|---------------|---------------|---------------|
| H | -2.0915797898 | -0.2478761734 | -2.1921161217 |
| C | -1.5021637587 | -0.7999812344 | -1.4654777695 |
| H | -0.7559305613 | -1.4441914418 | -1.9145746357 |
| C | -2.0421570547 | -1.1090602028 | -0.2181060236 |
| C | -1.1952749295 | -1.7362388398 | 0.7223840731  |
| C | 0.0936466021  | -2.1406017119 | 0.4258448593  |
| H | 0.7243423708  | -2.5174287484 | 1.2250424481  |
| H | 0.3464986009  | -2.5113183087 | -0.5601209113 |
| C | 1.1992904431  | -0.2741402063 | -0.3658200459 |
| H | 1.4196549816  | -0.0722361311 | 0.6747959599  |
| C | 2.2813586419  | -0.9379151835 | -1.2005702675 |
| C | 0.2473161291  | 0.5310836529  | -0.9919210157 |
| H | 0.359637256   | 0.677390852   | -2.0664558903 |
| C | -0.4040338097 | 1.6772702442  | -0.2537206748 |
| C | -3.4922754922 | -0.7106732261 | 0.1354919777  |
| H | -1.4948230207 | -1.7517633537 | 1.7653127874  |
| C | -4.429776729  | -1.6299700498 | -0.6865742414 |
| C | -3.8092792586 | 0.7579053388  | -0.2171869323 |
| C | -3.8147643984 | -0.9103236868 | 1.628680791   |
| H | -3.1780842873 | -0.2878488585 | 2.266225476   |

|   |               |               |               |
|---|---------------|---------------|---------------|
| H | -3.6942240361 | -1.9535571942 | 1.9366534224  |
| H | -4.8550638664 | -0.6291079505 | 1.8224026238  |
| H | -3.6032875187 | 0.9876067184  | -1.2663233178 |
| H | -3.2281054354 | 1.4457794273  | 0.402299108   |
| H | -4.8714180831 | 0.9623120025  | -0.0419729866 |
| H | -5.4809933027 | -1.4177277707 | -0.4578329386 |
| H | -4.2361489259 | -2.6837807967 | -0.461366542  |
| H | -4.2781466755 | -1.4846908227 | -1.7606067925 |
| H | -0.6261440543 | 1.3571079464  | 0.7732969501  |
| H | -1.3627650555 | 1.9200993401  | -0.718139674  |
| C | 0.440537119   | 2.9699003204  | -0.222762571  |
| H | 0.6085775877  | 3.3116666829  | -1.2541793254 |
| C | 1.7916611032  | 2.8651868602  | 0.4918090826  |
| H | -0.1578790754 | 3.7550624862  | 0.2607076562  |
| H | 2.4287243833  | 2.1494323234  | -0.0397259594 |
| H | 1.6395015854  | 2.4495825735  | 1.4977316835  |
| C | 2.5130982815  | 4.2121264876  | 0.594185426   |
| H | 2.6952821968  | 4.636947803   | -0.3997868812 |
| H | 3.4811489381  | 4.1120626131  | 1.0960126787  |
| H | 1.91764707    | 4.9393739213  | 1.1580219329  |
| C | 3.2943734322  | -1.8435028857 | -0.4755674259 |
| H | 2.8462505785  | -0.1574550034 | -1.7337675217 |
| H | 1.7905703556  | -1.519867029  | -1.995406442  |
| H | 2.7722585072  | -2.514214402  | 0.216431872   |
| C | 4.4288412548  | -1.1241512916 | 0.2760583853  |
| H | 3.7590039417  | -2.49191598   | -1.2291253949 |
| C | 4.0131006112  | -0.3483520038 | 1.5316829641  |
| H | 4.9421439366  | -0.4445046943 | -0.4183245332 |
| H | 5.17286118    | -1.8786355988 | 0.563081577   |
| H | 3.4319484671  | -0.9824051276 | 2.2115828981  |
| H | 3.4041670275  | 0.5260461749  | 1.2903769664  |
| H | 4.8923109881  | 0.0073577017  | 2.0792958177  |
| H | 4.8923109881  | 0.0073577017  | 2.0792958177  |

TS endo 0700

E(RB3LYP) = -706.406207286 A.U.

First frequency = -531.6644 cm<sup>-1</sup>

|   |               |               |               |
|---|---------------|---------------|---------------|
| H | -1.1749207584 | -0.3688508539 | -2.0071150754 |
| C | -0.9682116659 | -0.9187395759 | -1.096421082  |
| H | -0.1621051666 | -1.6331371403 | -1.1933813993 |
| C | -1.9561605761 | -1.1140380225 | -0.1353734095 |
| C | -1.5716468335 | -1.7249259265 | 1.0782011245  |
| C | -0.274598123  | -2.1507900502 | 1.3234511389  |
| H | -0.0117333879 | -2.5084445007 | 2.3155740272  |
| H | 0.3147231023  | -2.5894476176 | 0.5264281622  |
| C | 1.0739696234  | -0.4042762251 | 1.0503705298  |
| H | 0.8013545434  | -0.0619343976 | 2.0470617854  |
| C | 2.4122203907  | -1.1298716057 | 1.0140269772  |
| C | 0.5557799415  | 0.3528541118  | -0.0062228156 |
| H | 1.1053473425  | 0.3807748158  | -0.938892958  |
| C | -0.3116679837 | 1.5488054209  | 0.3258066883  |
| C | -3.3955192016 | -0.5765375104 | -0.2896115444 |
| H | -2.2606001236 | -1.6864416069 | 1.9185232591  |
| C | -3.8053128387 | 0.3635918864  | 0.8670370753  |
| C | -4.3419269319 | -1.8019648765 | -0.2910109387 |
| C | -3.5969250558 | 0.1887015207  | -1.6099003978 |
| H | -2.9545542675 | 1.073826825   | -1.66546148   |
| H | -4.6351007913 | 0.527971943   | -1.6874947584 |
| H | -3.3876174379 | -0.4414212947 | -2.4799449828 |
| H | -4.2693204873 | -2.3614777432 | 0.6465906782  |
| H | -4.0903340289 | -2.4860653726 | -1.1078948566 |
| H | -5.3837548413 | -1.484629293  | -0.4168705234 |
| H | -3.2028898849 | 1.2760051056  | 0.8672727505  |
| H | -3.6976043561 | -0.1116976287 | 1.8456480109  |
| H | -4.8559017182 | 0.6559950437  | 0.7585221941  |
| H | -1.0638583837 | 1.2032123028  | 1.0442252867  |
| H | -0.8638348321 | 1.8849874984  | -0.5606175228 |
| C | 0.4236159939  | 2.7561424426  | 0.9540203157  |
| H | -0.3173665544 | 3.3581095395  | 1.4970746952  |
| C | 1.1541009121  | 3.6886299066  | -0.024869084  |
| H | 1.1328856533  | 2.3902461265  | 1.7083545282  |
| H | 1.5327079241  | 4.5485463202  | 0.5432085353  |
| H | 0.4256828523  | 4.096790674   | -0.7392853652 |
| C | 2.3173359507  | 3.0564894935  | -0.7970990511 |
| H | 3.010423255   | 2.5433457605  | -0.1208197517 |

|   |              |               |               |
|---|--------------|---------------|---------------|
| H | 2.8841577687 | 3.8158461272  | -1.3462077142 |
| H | 1.9646951956 | 2.322460422   | -1.5268413573 |
| C | 2.8933107794 | -1.6439387903 | -0.3600663345 |
| H | 2.3755781423 | -1.9721165977 | 1.7152026362  |
| H | 3.1714251631 | -0.4521750809 | 1.4307231874  |
| H | 3.5054426089 | -2.5420122909 | -0.206582629  |
| C | 3.7205796419 | -0.6443969488 | -1.1900161027 |
| H | 2.0289368656 | -1.9732731658 | -0.9494020156 |
| C | 5.1083504734 | -0.357576649  | -0.6058920562 |
| H | 3.1759050041 | 0.2990524606  | -1.2949928685 |
| H | 3.8385361194 | -1.0456625653 | -2.2046840425 |
| H | 5.0458661185 | 0.0914498541  | 0.3909937994  |
| H | 5.6678691343 | 0.3364510646  | -1.2414213686 |
| H | 5.695928333  | -1.2786973798 | -0.516314613  |
| H | 5.695928333  | -1.2786973798 | -0.516314613  |

TS endo 0705

E(RB3LYP) = -706.406784943 A.U.

First frequency = -521.5191  $\text{cm}^{-1}$

|   |               |               |               |
|---|---------------|---------------|---------------|
| H | -2.1259969322 | -0.1521225909 | -2.1996177733 |
| C | -1.5207246024 | -0.682673018  | -1.4699623366 |
| H | -0.7269444069 | -1.2712724132 | -1.9138063191 |
| C | -2.0701262703 | -1.047788846  | -0.2413943565 |
| C | -1.2104337916 | -1.6400467728 | 0.7094403765  |
| C | 0.1060690508  | -1.9679307566 | 0.4328010835  |
| H | 0.7424489662  | -2.319015269  | 1.2396556477  |
| H | 0.3882946001  | -2.3272744644 | -0.5492954486 |
| C | 1.1252813664  | -0.0637275014 | -0.3264355535 |
| H | 1.361932462   | 0.1179720792  | 0.7159290663  |
| C | 2.2167897412  | -0.6774305366 | -1.1845217834 |
| C | 0.1410489621  | 0.7354278484  | -0.9089043264 |
| H | 0.2410413647  | 0.947881749   | -1.9728516651 |
| C | -0.593146657  | 1.7776520453  | -0.0993581534 |
| C | -3.550168537  | -0.7443290482 | 0.0822957714  |
| H | -1.5302348492 | -1.6861566693 | 1.7454143465  |
| C | -4.4079448536 | -1.7067661676 | -0.7767045935 |
| C | -3.9504161482 | 0.7071407954  | -0.2564470058 |

|   |               |               |               |
|---|---------------|---------------|---------------|
| C | -3.8953109196 | -0.9883070882 | 1.5637784746  |
| H | -3.3137996085 | -0.3386487406 | 2.2264318784  |
| H | -3.7179203967 | -2.0271759326 | 1.8586891376  |
| H | -4.9553159882 | -0.7747214059 | 1.7358354248  |
| H | -3.4342539722 | 1.4194400373  | 0.3922462544  |
| H | -5.0283075421 | 0.8398001136  | -0.1111251484 |
| H | -3.7279644355 | 0.968943567   | -1.2946125816 |
| H | -4.1533233092 | -2.7499554541 | -0.5630622381 |
| H | -4.2404966337 | -1.5340068911 | -1.8442865687 |
| H | -5.4755385539 | -1.5649191739 | -0.5705479305 |
| H | -0.8373501529 | 1.3461292928  | 0.8809809086  |
| H | -1.5469336773 | 2.0018206161  | -0.5834328863 |
| C | 0.1367079612  | 3.1258891009  | 0.1093865955  |
| H | 0.3147684854  | 3.5931042958  | -0.8691458574 |
| C | 1.4611441275  | 3.0883556242  | 0.9012601423  |
| H | -0.5717498195 | 3.7849245376  | 0.6277614059  |
| H | 1.4346627535  | 2.2595182758  | 1.6203689377  |
| H | 1.5418223553  | 4.0011896153  | 1.504622843   |
| C | 2.7132821004  | 2.9791172883  | 0.0239406822  |
| H | 2.8076288775  | 3.8588715971  | -0.6230523247 |
| H | 2.6741436058  | 2.0982776444  | -0.6197041323 |
| H | 3.6231562514  | 2.9108684811  | 0.6298694251  |
| C | 3.3129291419  | -1.4271685132 | -0.4133254026 |
| H | 2.6966113014  | 0.1127669745  | -1.7815521976 |
| H | 1.7612304517  | -1.3529088608 | -1.9243004935 |
| H | 2.8637235483  | -2.2191577235 | 0.1985455421  |
| C | 4.1732863033  | -0.523163153  | 0.4799477787  |
| H | 3.9683114295  | -1.9347037684 | -1.1334865304 |
| C | 5.2709049806  | -1.2941892962 | 1.2182803205  |
| H | 3.538841282   | -0.0056126682 | 1.2100959295  |
| H | 4.6239276283  | 0.2658234702  | -0.1368615009 |
| H | 4.8412541973  | -2.066788417  | 1.8663645824  |
| H | 5.876324499   | -0.6317884844 | 1.8454588799  |
| H | 5.9445359203  | -1.7943920116 | 0.5129718573  |
| H | 5.9445359203  | -1.7943920116 | 0.5129718573  |

TS endo 0712

E(RB3LYP) = -706.407071657 A.U.

First frequency =  $-549.7191 \text{ cm}^{-1}$

|   |               |               |               |
|---|---------------|---------------|---------------|
| H | -1.8356526113 | -1.2458738526 | -1.9737735389 |
| C | -1.2995653258 | -1.3823597935 | -1.0409405375 |
| H | -0.719401505  | -2.2991037743 | -1.0159589557 |
| C | -1.8207329096 | -0.8675863878 | 0.1505445938  |
| C | -1.0316186608 | -1.0025125815 | 1.3120119973  |
| C | 0.1754249212  | -1.6792344582 | 1.3312785186  |
| H | 0.7903969943  | -1.6406734024 | 2.2255959982  |
| H | 0.3198638511  | -2.5651016139 | 0.7263182552  |
| C | 1.4488539235  | -0.7911431664 | -0.3998316863 |
| H | 1.821388332   | -0.0978528802 | 0.3414287908  |
| C | 2.3176711112  | -2.0000210939 | -0.6976027702 |
| C | 0.5531711922  | -0.32498242   | -1.3691632831 |
| H | 0.6083738828  | -0.8276347505 | -2.3346312211 |
| C | 0.1736818687  | 1.1466079503  | -1.4800021605 |
| C | -3.1446210488 | -0.0772105866 | 0.218899477   |
| H | -1.2935308664 | -0.4079153605 | 2.1846125267  |
| C | -2.9580256879 | 1.3398485201  | 0.8055208963  |
| C | -4.1045644192 | -0.8722567875 | 1.1381524708  |
| C | -3.8146272167 | 0.0706930264  | -1.1591747854 |
| H | -4.7596206544 | 0.6139138862  | -1.0552046914 |
| H | -4.0384792607 | -0.9020848936 | -1.6080625187 |
| H | -3.1868638616 | 0.6331967656  | -1.8584917969 |
| H | -5.0750455415 | -0.3673417052 | 1.2109490171  |
| H | -3.6968890372 | -0.9696459583 | 2.1488563729  |
| H | -4.2708498489 | -1.8812100013 | 0.7471224372  |
| H | -3.9302902978 | 1.8325797755  | 0.9188914558  |
| H | -2.344476892  | 1.9579290723  | 0.146894125   |
| H | -2.4831643638 | 1.3225866399  | 1.7901818687  |
| H | -0.8837814924 | 1.241788452   | -1.7548900577 |
| H | 0.7354574578  | 1.5730067034  | -2.3256564476 |
| C | 0.4437738628  | 2.0081331725  | -0.2413059496 |
| H | -0.0686670845 | 1.5750500484  | 0.625090181   |
| C | 0.0121486697  | 3.4666635128  | -0.4280467584 |
| H | 1.5155853873  | 1.9901210614  | -0.0047828789 |
| H | -1.0447507388 | 3.5048162777  | -0.7244534932 |
| H | 0.5730727126  | 3.9043062151  | -1.2652518513 |

|   |               |               |               |
|---|---------------|---------------|---------------|
| C | 0.218432526   | 4.310832773   | 0.8323252946  |
| H | 1.2703894032  | 4.3093737083  | 1.1400762357  |
| H | -0.3698094563 | 3.9142063972  | 1.6677499967  |
| H | -0.0825796855 | 5.3517882518  | 0.6758019654  |
| C | 3.3732633231  | -2.3356389772 | 0.3736198441  |
| H | 2.83230407    | -1.8493947682 | -1.6586595746 |
| H | 1.6710513049  | -2.8755356103 | -0.8632298043 |
| H | 2.9508452898  | -2.1601369711 | 1.370838267   |
| C | 4.6981746322  | -1.5652341521 | 0.2364571549  |
| H | 3.601547972   | -3.4073516975 | 0.324957591   |
| C | 4.5869562472  | -0.0414840573 | 0.3618199293  |
| H | 5.1510021001  | -1.8130723668 | -0.7335531159 |
| H | 5.3949691498  | -1.9363880502 | 0.9992306537  |
| H | 3.9827849402  | 0.3867029248  | -0.4437789943 |
| H | 5.5754527692  | 0.4279567752  | 0.3206761083  |
| H | 4.12173447    | 0.2444589232  | 1.3125620384  |
| H | 4.12173447    | 0.2444589232  | 1.3125620384  |

TS endo 0713

E(RB3LYP) = -706.405979471 A.U.

First frequency = -549.8632  $\text{cm}^{-1}$

|   |               |               |               |
|---|---------------|---------------|---------------|
| H | -1.4087760269 | -1.6181338632 | -1.800488448  |
| C | -1.1825202839 | -1.5800775871 | -0.7408437869 |
| H | -0.5152429613 | -2.3694172945 | -0.4162738821 |
| C | -2.092129852  | -1.0263531843 | 0.1605005371  |
| C | -1.6816578842 | -0.9085026823 | 1.5047876189  |
| C | -0.453839233  | -1.3736186758 | 1.9504991696  |
| H | -0.1319009114 | -1.148460263  | 2.9639358767  |
| H | -0.0518118391 | -2.2989310936 | 1.5547805463  |
| C | 1.1257896527  | -0.453203929  | 0.6559603095  |
| H | 1.1550461165  | 0.3913752437  | 1.3336650835  |
| C | 2.2249973944  | -1.4740802241 | 0.8746062548  |
| C | 0.587866622   | -0.247316018  | -0.6202841107 |
| H | 1.001618766   | -0.8657675335 | -1.4141366056 |
| C | 0.0915705591  | 1.1080976157  | -1.1146439835 |
| C | -3.4508629562 | -0.4362263042 | -0.2728095399 |
| H | -2.2572505185 | -0.2666723142 | 2.1680425717  |

|   |               |               |               |
|---|---------------|---------------|---------------|
| C | -3.5814396015 | 1.0605047604  | 0.0847880881  |
| C | -4.5539982924 | -1.2256601143 | 0.4737959209  |
| C | -3.6995338761 | -0.5812974687 | -1.7850464422 |
| H | -4.6855889503 | -0.1785408691 | -2.0389807913 |
| H | -3.6757881255 | -1.6289323099 | -2.1011150968 |
| H | -2.9580818195 | -0.0302940732 | -2.373686487  |
| H | -4.4552457653 | -1.1201718514 | 1.558294407   |
| H | -4.4971233332 | -2.2928285492 | 0.2361895485  |
| H | -5.5478964181 | -0.8621818383 | 0.18746729    |
| H | -4.5907936847 | 1.4185741181  | -0.1480062615 |
| H | -2.8716974482 | 1.6607805144  | -0.4886035503 |
| H | -3.4002987096 | 1.2506842549  | 1.1459405977  |
| H | -0.8207777766 | 0.95833961    | -1.7010808073 |
| H | 0.8354700762  | 1.4800595171  | -1.8365015012 |
| C | -0.1604282871 | 2.2210136837  | -0.0679689738 |
| H | -1.069788855  | 2.7613833675  | -0.3518305328 |
| C | 0.9607605179  | 3.2698253171  | 0.0489244116  |
| H | -0.3813303827 | 1.7829334453  | 0.9119642545  |
| H | 0.6165144316  | 4.076880238   | 0.7089668532  |
| H | 1.1020443864  | 3.7296870597  | -0.9392769559 |
| C | 2.3130049312  | 2.7582286432  | 0.5543898862  |
| H | 3.0557137401  | 3.5631523047  | 0.5624009024  |
| H | 2.6997747108  | 1.952534514   | -0.0755962497 |
| H | 2.2366204512  | 2.3696228801  | 1.575614573   |
| C | 3.6420896189  | -0.9309601763 | 0.5887875758  |
| H | 2.0426346619  | -2.3546515999 | 0.2412091843  |
| H | 2.2051784719  | -1.8316496353 | 1.9112973738  |
| H | 3.797475831   | -0.0168873065 | 1.1783408333  |
| C | 3.9429710439  | -0.6380215264 | -0.8849422833 |
| H | 4.3764085911  | -1.6598705358 | 0.9591172301  |
| C | 5.3584140064  | -0.0946269546 | -1.0998181596 |
| H | 3.2140961733  | 0.0809995408  | -1.2754750489 |
| H | 3.8041352156  | -1.557731063  | -1.4701664252 |
| H | 5.5592813062  | 0.0984960288  | -2.1586654149 |
| H | 6.1143567258  | -0.8018677865 | -0.739632187  |
| H | 5.5021323895  | 0.8462638217  | -0.5560852249 |
| H | 5.5021323895  | 0.8462638217  | -0.5560852249 |



## 5.2 Exo

### 5.2.1 Starting TS

TS exo input

E(RB3LYP) = -706.412354746 A.U.

First frequency = -497.0242  $\text{cm}^{-1}$

|   |               |               |               |
|---|---------------|---------------|---------------|
| H | 1.4423088835  | -1.0414177784 | 2.1477145465  |
| C | 0.8905775916  | -1.323783604  | 1.2546921156  |
| H | -0.0132381351 | -1.8894627536 | 1.4530870892  |
| C | 1.5724868961  | -1.4420959965 | 0.0534037966  |
| C | 0.9104240398  | -1.6634097145 | -1.1752605257 |
| C | -0.458535625  | -1.8861427987 | -1.1481513694 |
| H | -1.0170897671 | -1.9740309133 | -2.0737447389 |
| H | -0.9201823907 | -2.3798278971 | -0.3033091844 |
| C | -1.3687079232 | -0.0017213532 | -0.0921093708 |
| H | -1.3515128876 | 0.4451094587  | -1.0828931352 |
| C | -2.6959941461 | -0.5678377778 | 0.3716178234  |
| C | -0.4164487422 | 0.4255738135  | 0.8297396483  |
| H | -0.7019883089 | 0.40935199    | 1.8809325168  |
| C | 0.6066170195  | 1.4654105679  | 0.4335780724  |
| H | 2.6081808855  | -1.1211517187 | 0.0399921479  |
| H | 1.0614597951  | 1.1639385402  | -0.5189103683 |
| H | 1.4228087886  | 1.4929024441  | 1.1659235103  |
| C | 0.0132060309  | 2.876236798   | 0.2807957842  |
| H | -0.7991857117 | 2.847996193   | -0.4577130274 |
| C | 1.0531877824  | 3.9201924563  | -0.140932418  |
| H | -0.4509109709 | 3.1833877072  | 1.228648061   |
| H | 1.5157341222  | 3.6046238883  | -1.086437936  |
| H | 1.8642883355  | 3.9434439141  | 0.5996936666  |
| C | 0.4620873146  | 5.3237011688  | -0.3007144162 |
| H | -0.3294922581 | 5.3332263292  | -1.0587735294 |
| H | 1.2230684313  | 6.0503776741  | -0.6037152291 |
| H | 0.0210787701  | 5.6743288939  | 0.6394499948  |
| C | -3.6624249457 | -0.9314540185 | -0.7621286482 |
| H | -3.1764528706 | 0.1685232662  | 1.0304176359  |
| H | -2.5251466176 | -1.4529693129 | 1.0046823928  |
| H | -3.845085704  | -0.0358688888 | -1.3732998707 |

|   |               |               |               |
|---|---------------|---------------|---------------|
| C | -5.0067761516 | -1.5031062581 | -0.2864940412 |
| H | -3.1834521115 | -1.6599358075 | -1.4253983385 |
| C | -5.8695288881 | -0.5137621331 | 0.505769743   |
| H | -4.8210829348 | -2.3979105307 | 0.3236851362  |
| H | -5.5717053915 | -1.8457542593 | -1.1626680234 |
| H | -5.3906411045 | -0.2138203919 | 1.4432237554  |
| H | -6.8405141025 | -0.9513839092 | 0.7595434397  |
| H | -6.0554662914 | 0.3964179291  | -0.0764216142 |
| C | 1.6203202366  | -1.4717521988 | -2.5334718442 |
| C | 0.9393315221  | -0.3341514864 | -3.3290676346 |
| H | 1.4242671554  | -0.2071618217 | -4.3037345153 |
| H | -0.1195493237 | -0.5381805633 | -3.5113286765 |
| H | 1.0089944256  | 0.6165461014  | -2.7905061814 |
| C | 3.1105130369  | -1.1160294544 | -2.3797339766 |
| H | 3.2493985388  | -0.1618242128 | -1.8610682451 |
| H | 3.65672186    | -1.8887335446 | -1.8290478488 |
| H | 3.5725984078  | -1.0247509771 | -3.3681657082 |
| C | 1.5225357909  | -2.7857600122 | -3.3427300901 |
| H | 2.0154496744  | -2.6794900196 | -4.3161495036 |
| H | 2.0036246647  | -3.6090746378 | -2.8044645177 |
| H | 0.4810427761  | -3.0686856971 | -3.5214181743 |
| H | 0.4810427761  | -3.0686856971 | -3.5214181743 |

### 5.2.2 Lowest TS

TS exo 0004

E(RB3LYP) = -706.417083971 A.U.

First frequency = -498.6192 cm<sup>-1</sup>

|   |              |               |               |
|---|--------------|---------------|---------------|
| H | 1.3726758095 | -0.8461137636 | -3.1100649834 |
| C | 1.3651875071 | -0.0328543413 | -2.389231868  |
| H | 0.8400268229 | 0.8539823988  | -2.7255032834 |
| C | 2.3785617742 | 0.04616202    | -1.4481973464 |
| C | 2.3648200796 | 0.9782949632  | -0.3843655047 |
| C | 1.3274941558 | 1.8991023153  | -0.3488954122 |
| H | 1.205422912  | 2.5815231785  | 0.4834903925  |
| H | 0.8982836487 | 2.2581629362  | -1.2753128324 |
| C | -0.581045111 | 0.6596136605  | -0.2658494522 |

|   |               |               |               |
|---|---------------|---------------|---------------|
| H | -0.3895984442 | 0.5080592568  | 0.792827817   |
| C | -1.560672265  | 1.7622133209  | -0.6151026995 |
| C | -0.4220638064 | -0.4440095312 | -1.1054929199 |
| H | -1.025658965  | -0.4591875756 | -2.0114263146 |
| C | -0.0384296772 | -1.7935159477 | -0.5320173126 |
| H | 3.077358825   | -0.7850854969 | -1.3944053933 |
| H | 0.8850515915  | -1.6776669299 | 0.0459504619  |
| H | 0.1913204537  | -2.4922601277 | -1.3461067889 |
| C | -1.1155314217 | -2.4109506616 | 0.3822701131  |
| H | -0.7347072666 | -3.3557860297 | 0.7950135275  |
| C | -2.4584321608 | -2.6694859207 | -0.3091946514 |
| H | -1.2768718328 | -1.7461868189 | 1.2417331407  |
| H | -2.3047020031 | -3.3568097119 | -1.1526339983 |
| H | -2.8283790267 | -1.7325192984 | -0.7422451696 |
| C | -3.5162442801 | -3.2379012805 | 0.6403567299  |
| H | -3.1847937711 | -4.183621678  | 1.0845014479  |
| H | -4.463519833  | -3.4253469335 | 0.1239159635  |
| H | -3.7181690167 | -2.5400915076 | 1.4611715615  |
| C | -3.0388538637 | 1.3411328767  | -0.482000458  |
| H | -1.3872206041 | 2.0857213909  | -1.6509956829 |
| H | -1.3783403755 | 2.640999116   | 0.0161529124  |
| H | -3.6784724886 | 2.1797014129  | -0.7912789044 |
| C | -3.4425309006 | 0.8938433287  | 0.9270738085  |
| H | -3.2393574349 | 0.525082312   | -1.1889865658 |
| C | -4.9061454453 | 0.4527032583  | 1.0113570026  |
| H | -3.2575333481 | 1.714008565   | 1.6345570767  |
| H | -2.7977795548 | 0.0653191733  | 1.2429518766  |
| H | -5.5833477963 | 1.2617296391  | 0.7141628204  |
| H | -5.1767822988 | 0.1467027014  | 2.0272859711  |
| H | -5.0953158799 | -0.398241461  | 0.3470052449  |
| C | 3.3544184831  | 0.7949277639  | 0.7842619303  |
| C | 3.1340506265  | -0.5718973215 | 1.4738704415  |
| H | 3.2728488139  | -1.4047031872 | 0.7787579235  |
| H | 3.8426070857  | -0.7052971628 | 2.2996094726  |
| H | 2.1208455579  | -0.6410754101 | 1.8835352128  |
| C | 4.7960860138  | 0.8592001993  | 0.2296246555  |
| H | 4.9850993439  | 1.8254442082  | -0.2491135689 |
| H | 5.5234740843  | 0.7300000635  | 1.0393186407  |

|   |              |              |               |
|---|--------------|--------------|---------------|
| H | 4.9820744702 | 0.077478528  | -0.5124504159 |
| C | 3.2046282766 | 1.893882972  | 1.8523847551  |
| H | 3.3459361703 | 2.8919959925 | 1.4256545583  |
| H | 2.2206106508 | 1.8627676159 | 2.331693569   |
| H | 3.9555702374 | 1.7547014488 | 2.6370330453  |
| H | 3.9555702374 | 1.7547014488 | 2.6370330453  |

### 5.2.3 Additional TS

TS<sub>exo</sub> 0001

E(RB3LYP) = -706.415654804 A.U.

First frequency = -501.1935 cm<sup>-1</sup>

|   |               |               |               |
|---|---------------|---------------|---------------|
| H | 1.0208337039  | -0.4647028386 | -3.2539801737 |
| C | 1.1042725758  | 0.2306163663  | -2.4229201352 |
| H | 0.6155184778  | 1.1835838235  | -2.5905310191 |
| C | 2.1741259451  | 0.1167066286  | -1.5504697919 |
| C | 2.2778900609  | 0.8796983926  | -0.364197415  |
| C | 1.2959233683  | 1.8291319702  | -0.1221401051 |
| H | 1.261177185   | 2.3820648686  | 0.8087855039  |
| H | 0.8263093417  | 2.3411230077  | -0.9523395737 |
| C | -0.6666812239 | 0.6723388084  | -0.0889054593 |
| H | -0.4198310617 | 0.342641953   | 0.9181415272  |
| C | -1.6171030732 | 1.8453452636  | -0.1768506678 |
| C | -0.6210058322 | -0.2875006584 | -1.1013738612 |
| H | -1.2859228756 | -0.1350127652 | -1.9514815176 |
| C | -0.2919486809 | -1.7266232161 | -0.7725839787 |
| H | 2.8225730992  | -0.7486344982 | -1.6639972549 |
| H | 0.5947025448  | -1.748935481  | -0.1275499831 |
| H | -0.0229594575 | -2.2756370999 | -1.6833925223 |
| C | -1.4465371018 | -2.4565696713 | -0.064568867  |
| H | -1.7067890624 | -1.9121092076 | 0.8531982341  |
| C | -1.1168360851 | -3.9136146131 | 0.2779958862  |
| H | -2.3438246285 | -2.4231093279 | -0.6988617936 |
| H | -0.2165666532 | -3.9399399056 | 0.9073243661  |
| H | -0.8578207614 | -4.4527991941 | -0.6435004292 |
| C | -2.2642707521 | -4.6349865181 | 0.990720145   |
| H | -3.1667839012 | -4.6491495177 | 0.3689258021  |

|   |               |               |               |
|---|---------------|---------------|---------------|
| H | -2.5208058786 | -4.1330769877 | 1.9307399398  |
| H | -2.0050079682 | -5.6724392222 | 1.2262533866  |
| C | -3.0535162394 | 1.4697691647  | 0.2292123677  |
| H | -1.6272587464 | 2.2314103015  | -1.2064920768 |
| H | -1.2735969685 | 2.6723024224  | 0.457730917   |
| H | -3.408223955  | 0.6591633486  | -0.4212617534 |
| C | -4.0300455185 | 2.6492685517  | 0.1660453353  |
| H | -3.0435493617 | 1.0567450771  | 1.247795604   |
| C | -5.4567546411 | 2.2648286617  | 0.5683932805  |
| H | -4.0324373172 | 3.0614858571  | -0.8523921464 |
| H | -3.667199358  | 3.4552508307  | 0.8184631643  |
| H | -5.4859867477 | 1.8793740777  | 1.5939797426  |
| H | -5.8533606221 | 1.4821594233  | -0.0883784951 |
| H | -6.1360363523 | 3.1218719978  | 0.5144413346  |
| C | 3.3216810738  | 0.4742806279  | 0.6963012072  |
| C | 4.7289130229  | 0.5322477129  | 0.0589190305  |
| H | 5.4925874977  | 0.2477321982  | 0.7918895016  |
| H | 4.8183767435  | -0.1460565955 | -0.794400018  |
| H | 4.9536631411  | 1.5438887481  | -0.294087167  |
| C | 3.3113432687  | 1.4165095813  | 1.9141374962  |
| H | 4.0995886697  | 1.125724365   | 2.6163844744  |
| H | 3.4897662718  | 2.4557352874  | 1.620005912   |
| H | 2.3597846723  | 1.3725068379  | 2.454067202   |
| C | 3.0496309313  | -0.961766302  | 1.2025080869  |
| H | 2.0626107219  | -1.0265125507 | 1.6725008524  |
| H | 3.0824222467  | -1.6922383466 | 0.3892841969  |
| H | 3.7983900377  | -1.2564940494 | 1.9469937305  |
| H | 3.7983900377  | -1.2564940494 | 1.9469937305  |

TS exo 0005

E(RB3LYP) = -706.415918996 A.U.

First frequency = -500.0603 cm<sup>-1</sup>

|   |              |               |               |
|---|--------------|---------------|---------------|
| H | 1.2826460004 | -0.5543844324 | -3.2519698516 |
| C | 1.3079407519 | 0.1950821413  | -2.465335925  |
| H | 0.8833582443 | 1.1511887961  | -2.7498695095 |
| C | 2.2746185506 | 0.1052333317  | -1.477013563  |
| C | 2.2872150261 | 0.9478158967  | -0.3412292926 |

|   |               |               |               |
|---|---------------|---------------|---------------|
| C | 1.3309035661  | 1.950166227   | -0.2729698758 |
| H | 1.2223454122  | 2.5697271593  | 0.6090014945  |
| H | 0.9749394671  | 2.4172921517  | -1.1822271611 |
| C | -0.6766778866 | 0.8666306847  | -0.3772254225 |
| H | -0.5415535698 | 0.6036438505  | 0.6684356713  |
| C | -1.5545015854 | 2.0680523338  | -0.6573519994 |
| C | -0.5653568476 | -0.1646422261 | -1.3115606333 |
| H | -1.1305387106 | -0.0501100022 | -2.2366168198 |
| C | -0.3385615408 | -1.5883332602 | -0.8536128836 |
| H | 2.8919759628  | -0.7896134494 | -1.4607843931 |
| H | 0.4759684174  | -1.5998122415 | -0.1194833158 |
| H | -0.0049196153 | -2.2111840221 | -1.6927849406 |
| C | -1.5919863131 | -2.2195070388 | -0.2229986081 |
| H | -1.909587964  | -1.6087748647 | 0.6328494026  |
| C | -1.3744483818 | -3.6659540333 | 0.2342634749  |
| H | -2.4219788398 | -2.1831113321 | -0.9429097422 |
| H | -0.5390611205 | -3.6957483364 | 0.9473014062  |
| H | -1.0611290542 | -4.2745541013 | -0.6249971165 |
| C | -2.6207253747 | -4.2831680609 | 0.8752519141  |
| H | -3.4612462371 | -4.2927084279 | 0.1718422733  |
| H | -2.935190617  | -3.7099830972 | 1.7550035392  |
| H | -2.4417674908 | -5.3148534005 | 1.1954619078  |
| C | -3.0591774774 | 1.7795647758  | -0.4772294127 |
| H | -1.383017706  | 2.403016194   | -1.6897622807 |
| H | -1.2735174343 | 2.9083554832  | -0.0096964481 |
| H | -3.6331456628 | 2.6594384117  | -0.8004291496 |
| C | -3.4585565595 | 1.4238302979  | 0.9594340389  |
| H | -3.3456351119 | 0.9568878985  | -1.1462122576 |
| C | -4.9586689832 | 1.1560290682  | 1.1081511924  |
| H | -3.1587089427 | 2.2412060083  | 1.6300482275  |
| H | -2.8978216869 | 0.53935706    | 1.2857481216  |
| H | -5.5482637594 | 2.0317234455  | 0.8131465423  |
| H | -5.2236290916 | 0.9077236853  | 2.1411308408  |
| H | -5.2715307274 | 0.3191994019  | 0.4731929988  |
| C | 3.1915198214  | 0.5792173053  | 0.8524888934  |
| C | 2.796934554   | -0.8033642217 | 1.422868926   |
| H | 3.4457145361  | -1.0727498891 | 2.2644457085  |
| H | 1.7629550938  | -0.7929771236 | 1.7836115131  |

|   |              |               |               |
|---|--------------|---------------|---------------|
| H | 2.8817673682 | -1.5924355614 | 0.6704083813  |
| C | 4.6597737474 | 0.5322225872  | 0.3710203673  |
| H | 4.9701644959 | 1.5051307998  | -0.0235084517 |
| H | 5.32604519   | 0.2709810183  | 1.201200283   |
| H | 4.8065543087 | -0.2099492132 | -0.4188497674 |
| C | 3.0973190031 | 1.6079693743  | 1.9942888342  |
| H | 2.0928093139 | 1.6422496217  | 2.428686956   |
| H | 3.7916125933 | 1.3379353403  | 2.7968153217  |
| H | 3.3557163741 | 2.6146863725  | 1.6506791855  |
| H | 3.3557163741 | 2.6146863725  | 1.6506791855  |

TS exo 0009

E(RB3LYP) = -706.415675432 A.U.

First frequency = -510.2487  $\text{cm}^{-1}$

|   |               |               |               |
|---|---------------|---------------|---------------|
| H | 0.8145489435  | -0.4560597068 | -3.2295216605 |
| C | 1.0097292878  | 0.2480745446  | -2.4248223937 |
| H | 0.6387164136  | 1.2489757719  | -2.6139516571 |
| C | 2.095558122   | 0.0328080854  | -1.5891892504 |
| C | 2.3330290821  | 0.8103089584  | -0.4336061251 |
| C | 1.4751516918  | 1.8742526528  | -0.190466554  |
| H | 1.5374355325  | 2.4533982598  | 0.723043892   |
| H | 1.0453889008  | 2.4168406815  | -1.0227811968 |
| C | -0.6126676088 | 0.9784615438  | -0.0666391263 |
| H | -0.3797103125 | 0.6614095133  | 0.9482258764  |
| C | -1.4083836362 | 2.2623929361  | -0.1717713899 |
| C | -0.6976901109 | -0.0240971767 | -1.0382224537 |
| H | -1.3703258457 | 0.1578464968  | -1.8749134154 |
| C | -0.4997031294 | -1.4729768376 | -0.647283421  |
| H | 2.6324812128  | -0.9064968035 | -1.697521905  |
| H | 0.4029434731  | -1.5481304231 | -0.0294212319 |
| H | -0.3129297421 | -2.0861850921 | -1.5373516883 |
| C | -1.686739053  | -2.0656586741 | 0.1314386234  |
| H | -1.8863685963 | -1.4438500415 | 1.0147049882  |
| C | -1.4532776301 | -3.5161377695 | 0.5683271823  |
| H | -2.5940135295 | -2.0139732387 | -0.4869012913 |
| H | -0.54518146   | -3.563718101  | 1.1849606299  |
| H | -1.2504485437 | -4.1332634281 | -0.3176288573 |

|   |               |               |               |
|---|---------------|---------------|---------------|
| C | -2.6350323428 | -4.103493307  | 1.345069086   |
| H | -2.8380199955 | -3.5216321348 | 2.2514948005  |
| H | -2.4449771575 | -5.1383124038 | 1.6482860565  |
| H | -3.5477855384 | -4.095408945  | 0.7383055476  |
| C | -2.8195527325 | 2.172971885   | 0.4482634926  |
| H | -1.4978097066 | 2.5501207608  | -1.2291862433 |
| H | -0.873372388  | 3.0810404598  | 0.3245712975  |
| H | -2.7301052829 | 1.8311692976  | 1.4893574518  |
| C | -3.7977158046 | 1.2620391574  | -0.3004325928 |
| H | -3.2434472692 | 3.1857708823  | 0.4970179824  |
| C | -5.1867414432 | 1.2302734765  | 0.3435067215  |
| H | -3.3911778078 | 0.2463872106  | -0.3429207124 |
| H | -3.8800398711 | 1.6026684996  | -1.3421144738 |
| H | -5.1327843944 | 0.8607369501  | 1.3741010907  |
| H | -5.8708512613 | 0.5772221643  | -0.2082660181 |
| H | -5.6332705145 | 2.2308549794  | 0.3758669848  |
| C | 3.3692128852  | 0.3227703126  | 0.5996226658  |
| C | 3.5128917024  | 1.2965272836  | 1.7837399547  |
| H | 4.2925294591  | 0.941119662   | 2.4655724216  |
| H | 3.7923547393  | 2.3000465102  | 1.4473720671  |
| H | 2.5851696815  | 1.3749848275  | 2.3600316106  |
| C | 2.9665776898  | -1.0591395727 | 1.1654678169  |
| H | 2.0029585028  | -1.000727242  | 1.682469644   |
| H | 2.8794862026  | -1.8116278521 | 0.3766718487  |
| H | 3.7142196527  | -1.4137425817 | 1.8845205574  |
| C | 4.7458309675  | 0.2070680358  | -0.0944640898 |
| H | 5.5052700842  | -0.1364769693 | 0.6173262887  |
| H | 4.7243159404  | -0.5028968131 | -0.9262101932 |
| H | 5.0629230456  | 1.176715041   | -0.491652692  |
| H | 5.0629230456  | 1.176715041   | -0.491652692  |

TS exo 0010

E(RB3LYP) = -706.415218868 A.U.

First frequency = -512.6820  $\text{cm}^{-1}$

|   |              |               |               |
|---|--------------|---------------|---------------|
| H | 1.1334161837 | -0.2166470968 | -3.3429674902 |
| C | 1.1746345808 | 0.3888781598  | -2.4412710442 |
| H | 0.623422356  | 1.3201644809  | -2.5092129213 |



|   |               |               |               |
|---|---------------|---------------|---------------|
| C | 2.2631080537  | 0.2613253117  | -1.59154701   |
| C | 2.3235311338  | 0.9002474278  | -0.3330258825 |
| C | 1.2759185497  | 1.7450898885  | 0.0073872882  |
| H | 1.2077227692  | 2.1918521545  | 0.9920709156  |
| H | 0.7727984408  | 2.3130400971  | -0.7648469868 |
| C | -0.5939141207 | 0.4607381591  | -0.092619969  |
| H | -0.327323449  | 0.062003912   | 0.8823754827  |
| C | -1.6183779819 | 1.5747456505  | -0.0929247187 |
| C | -0.4812813878 | -0.3975599319 | -1.1911274635 |
| H | -1.1625927161 | -0.2117344662 | -2.0223686922 |
| C | -0.0469327146 | -1.839904167  | -1.0299419349 |
| H | 2.9693384049  | -0.5389854762 | -1.7986602061 |
| H | 0.7576835048  | -1.8898538795 | -0.2866440247 |
| H | 0.3835217743  | -2.203532836  | -1.9698338696 |
| C | -1.1828056185 | -2.800409837  | -0.6174578221 |
| H | -2.0168944193 | -2.6986245912 | -1.3267393943 |
| C | -1.708972675  | -2.6156825243 | 0.8099327775  |
| H | -0.8182159294 | -3.8316230183 | -0.7267233971 |
| H | -2.1132071353 | -1.6048037538 | 0.9242559397  |
| H | -0.8689102735 | -2.6913193291 | 1.5146826813  |
| C | -2.7864357887 | -3.6394372009 | 1.1792122606  |
| H | -2.4037380937 | -4.6638957448 | 1.1042749673  |
| H | -3.6488004928 | -3.56078781   | 0.5070152958  |
| H | -3.1480953625 | -3.4921773985 | 2.2022486014  |
| C | -3.0370806551 | 1.088165929   | 0.2529710847  |
| H | -1.6389036857 | 2.0475262487  | -1.0858050402 |
| H | -1.3337145337 | 2.363143906   | 0.6153983052  |
| H | -3.3284899863 | 0.3000265631  | -0.4542430879 |
| C | -4.0831015293 | 2.2082162112  | 0.2372432769  |
| H | -3.0250566826 | 0.6163458912  | 1.2454835217  |
| C | -5.4901942507 | 1.7138766923  | 0.5849042502  |
| H | -4.0920300116 | 2.6794555627  | -0.7551828821 |
| H | -3.782874268  | 2.9941733579  | 0.9436298408  |
| H | -5.824863373  | 0.9487810985  | -0.1249162887 |
| H | -6.220543693  | 2.5293544581  | 0.5659013642  |
| H | -5.5141971128 | 1.2670108816  | 1.5853917608  |
| C | 3.3975202783  | 0.4574188253  | 0.6810802187  |
| C | 4.7947063566  | 0.6580830297  | 0.050887441   |

|   |              |               |               |
|---|--------------|---------------|---------------|
| H | 4.9580029876 | 1.7101324858  | -0.2042432522 |
| H | 5.5781104968 | 0.350398224   | 0.7529941914  |
| H | 4.9188166222 | 0.0703387412  | -0.8630721133 |
| C | 3.3410852796 | 1.2761406154  | 1.9840294828  |
| H | 3.4517921111 | 2.3478565623  | 1.790272298   |
| H | 2.3995245607 | 1.121235882   | 2.5209827369  |
| H | 4.1524833118 | 0.969125763   | 2.6521951015  |
| C | 3.2109707081 | -1.0339692245 | 1.0458572745  |
| H | 3.2752266022 | -1.6780495356 | 0.164351563   |
| H | 3.982167779  | -1.3575148936 | 1.7546388334  |
| H | 2.2337167557 | -1.199162539  | 1.5117551486  |
| H | 2.2337167557 | -1.199162539  | 1.5117551486  |

TS exo 0012

E(RB3LYP) = -706.415970250 A.U.

First frequency = -517.6384 cm<sup>-1</sup>

|   |               |               |               |
|---|---------------|---------------|---------------|
| H | 0.9861245657  | -0.0109912785 | -3.3293601142 |
| C | 1.1127280026  | 0.5661664404  | -2.4169925126 |
| H | 0.6564945584  | 1.5491408736  | -2.450587442  |
| C | 2.2113681766  | 0.3153955635  | -1.6071578089 |
| C | 2.3700892407  | 0.9144635653  | -0.3386695679 |
| C | 1.4144366887  | 1.8427452504  | 0.0537642184  |
| H | 1.4179243337  | 2.2688986534  | 1.0499201647  |
| H | 0.9454569533  | 2.4757235037  | -0.6890155576 |
| C | -0.5640544334 | 0.7449214463  | -0.0054484954 |
| H | -0.2945619183 | 0.2875462833  | 0.9431190111  |
| C | -1.4828548737 | 1.9456341136  | 0.0986933643  |
| C | -0.5646257017 | -0.0851070038 | -1.1338215622 |
| H | -1.2493976341 | 0.1871849267  | -1.9363301114 |
| C | -0.2644676218 | -1.5672222727 | -1.022138019  |
| H | 2.8305859501  | -0.5435496419 | -1.8541030724 |
| H | 0.5605678381  | -1.7128488646 | -0.3147488443 |
| H | 0.091858825   | -1.9441709791 | -1.9873105111 |
| C | -1.4704674774 | -2.4276071176 | -0.5855095642 |
| H | -2.3263148743 | -2.2041538304 | -1.2386597102 |
| C | -1.8934106219 | -2.2679849653 | 0.8791558645  |
| H | -1.2265226137 | -3.4842355192 | -0.7642303362 |

|   |               |               |               |
|---|---------------|---------------|---------------|
| H | -2.1069146786 | -1.2158758802 | 1.0914594167  |
| H | -1.0495291651 | -2.5440631445 | 1.5265636519  |
| C | -3.1208936053 | -3.1115407853 | 1.2348545851  |
| H | -2.9417153371 | -4.1764505371 | 1.046659851   |
| H | -3.9872066764 | -2.8113417203 | 0.6338921762  |
| H | -3.3938119073 | -3.0000994188 | 2.2894764414  |
| C | -2.8816606804 | 1.6115891547  | 0.6634294248  |
| H | -1.5952260091 | 2.4077486187  | -0.8926525335 |
| H | -1.0322160789 | 2.7095241772  | 0.7434616971  |
| H | -2.7600078184 | 1.0635532007  | 1.6086723545  |
| C | -3.7849659853 | 0.8081313992  | -0.2783539328 |
| H | -3.3900782233 | 2.5503222217  | 0.9237023696  |
| C | -5.1184155939 | 0.4219326605  | 0.3675894595  |
| H | -3.265317827  | -0.0986657044 | -0.6030595233 |
| H | -3.9668811582 | 1.3970691183  | -1.1879249134 |
| H | -4.9561078531 | -0.2150661682 | 1.2448296567  |
| H | -5.7578174517 | -0.1296465379 | -0.3294885802 |
| H | -5.6724624493 | 1.3073385051  | 0.7002228148  |
| C | 3.4283838019  | 0.3501064644  | 0.6306235393  |
| C | 4.8183126816  | 0.4358836284  | -0.0403214466 |
| H | 5.5906542187  | 0.0397609039  | 0.6289457036  |
| H | 4.8588386527  | -0.1381895065 | -0.9703759869 |
| H | 5.0712857506  | 1.4742027736  | -0.2778929401 |
| C | 3.4878943667  | 1.1392638127  | 1.951567661   |
| H | 4.2874294329  | 0.7431166471  | 2.5862977728  |
| H | 3.6914794674  | 2.2005549642  | 1.7766768823  |
| H | 2.5529579938  | 1.0590264313  | 2.5157742662  |
| C | 3.1152733648  | -1.1260529267 | 0.9698370982  |
| H | 3.0936755613  | -1.7520672504 | 0.0733509033  |
| H | 3.8738655321  | -1.5359967262 | 1.6468160785  |
| H | 2.1411848392  | -1.2120269573 | 1.4629484983  |
| H | 2.1411848392  | -1.2120269573 | 1.4629484983  |

TS exo 0014

E(RB3LYP) = -706.415498986 A.U.

First frequency = -480.6123 cm<sup>-1</sup>

|   |              |               |               |
|---|--------------|---------------|---------------|
| H | 1.0043268709 | -0.2043767027 | -3.3462540094 |
|---|--------------|---------------|---------------|

|   |               |               |               |
|---|---------------|---------------|---------------|
| C | 1.0859883157  | 0.4165056679  | -2.4582123558 |
| H | 0.5715689408  | 1.3674602276  | -2.5287984642 |
| C | 2.1500024175  | 0.2255758477  | -1.5943626588 |
| C | 2.2468037596  | 0.8826275839  | -0.3457562906 |
| C | 1.2713216572  | 1.818038318   | -0.0302874278 |
| H | 1.2425940945  | 2.280823739   | 0.9514175124  |
| H | 0.8102775734  | 2.4116427169  | -0.8090289558 |
| C | -0.7038490521 | 0.6711910007  | -0.0833762207 |
| H | -0.4563617787 | 0.3047809605  | 0.9103528355  |
| C | -1.6545717389 | 1.8457608723  | -0.1304881997 |
| C | -0.6417227902 | -0.2423558672 | -1.1324431116 |
| H | -1.2988355476 | -0.0710734592 | -1.9840928881 |
| C | -0.2408445191 | -1.6753396749 | -0.8702013442 |
| H | 2.7982653713  | -0.6216289566 | -1.7898570595 |
| H | 0.67044613    | -1.6786614144 | -0.2573684489 |
| H | 0.0211082814  | -2.1773330138 | -1.8095475962 |
| C | -1.3330751549 | -2.4843195922 | -0.1489914826 |
| H | -1.5891419035 | -1.9823440644 | 0.7937198443  |
| C | -0.9192345591 | -3.9322808914 | 0.1356050029  |
| H | -2.2514742134 | -2.4771063974 | -0.752923269  |
| H | 0.0013163959  | -3.9314272679 | 0.7356291115  |
| H | -0.6634087381 | -4.4288364368 | -0.8104038185 |
| C | -2.0046924583 | -4.7334738223 | 0.8600100648  |
| H | -2.9252076679 | -4.7749961556 | 0.2664993133  |
| H | -2.2552629673 | -4.2746987326 | 1.8233785668  |
| H | -1.6856674407 | -5.7629254921 | 1.0534780825  |
| C | -3.0923882983 | 1.4537859045  | 0.2545028837  |
| H | -1.659855599  | 2.272239229   | -1.1440517863 |
| H | -1.3140518626 | 2.6467882647  | 0.538077629   |
| H | -3.4442415239 | 0.6702095929  | -0.4297630214 |
| C | -4.0689545017 | 2.6347339391  | 0.2357370875  |
| H | -3.0859938327 | 0.9997559086  | 1.2554942808  |
| C | -5.4969985704 | 2.2343164915  | 0.6172423617  |
| H | -4.0678640779 | 3.0880007023  | -0.7651019472 |
| H | -3.7085123521 | 3.4135431838  | 0.921645137   |
| H | -6.1761009833 | 3.0929305356  | 0.5960007438  |
| H | -5.5296812132 | 1.8073705727  | 1.626162723   |
| H | -5.8913942669 | 1.4791467518  | -0.0722404248 |

|   |              |               |               |
|---|--------------|---------------|---------------|
| C | 3.2493208867 | 0.434091644   | 0.7388596735  |
| C | 4.1975240762 | -0.6753909942 | 0.248002916   |
| H | 4.9151399388 | -0.9238362406 | 1.0367321713  |
| H | 3.6553940342 | -1.5924570756 | -0.0044883916 |
| H | 4.7674197758 | -0.3602202809 | -0.6321314599 |
| C | 4.1109469606 | 1.6455060483  | 1.1640873767  |
| H | 4.6711781374 | 2.0412328382  | 0.3105428077  |
| H | 3.4938711473 | 2.4564099156  | 1.5618624266  |
| H | 4.8292983188 | 1.3567367004  | 1.9401910276  |
| C | 2.4837493474 | -0.1026859947 | 1.9704235299  |
| H | 1.8734896502 | -0.9716016846 | 1.7028430054  |
| H | 3.1863408686 | -0.4100632582 | 2.7535102121  |
| H | 1.8198777619 | 0.6529221938  | 2.4003505673  |
| H | 1.8198777619 | 0.6529221938  | 2.4003505673  |

TS exo 0015

E(RB3LYP) = -706.417041371 A.U.

First frequency = -473.7528  $\text{cm}^{-1}$

|   |               |               |               |
|---|---------------|---------------|---------------|
| H | 1.3371062742  | -0.9153211974 | -3.1934658003 |
| C | 1.3597534542  | -0.1029547915 | -2.4722546246 |
| H | 0.8341490717  | 0.7906038356  | -2.7874133218 |
| C | 2.3718671937  | -0.0607696458 | -1.5305815176 |
| C | 2.3884044378  | 0.870474782   | -0.4654877649 |
| C | 1.3914048364  | 1.8353879487  | -0.4330744114 |
| H | 1.3035806288  | 2.5143011749  | 0.4095095827  |
| H | 0.9756697004  | 2.2223239613  | -1.3542364572 |
| C | -0.5662535701 | 0.6684191752  | -0.3185174235 |
| H | -0.3651850528 | 0.5528101884  | 0.742561697   |
| C | -1.5159993058 | 1.7856522892  | -0.6997647891 |
| C | -0.4449117524 | -0.4666278263 | -1.1148396617 |
| H | -1.0466319001 | -0.5065117255 | -2.0205511805 |
| C | -0.0494159375 | -1.7923438728 | -0.4999359039 |
| H | 3.0416992527  | -0.9126799402 | -1.4882830672 |
| H | 0.8971197204  | -1.6585262127 | 0.0388515151  |
| H | 0.1466798229  | -2.5274512159 | -1.2902115232 |
| C | -1.0976172838 | -2.3585291508 | 0.4794081686  |
| H | -0.7126068993 | -3.2901727728 | 0.9174022596  |

|   |               |               |               |
|---|---------------|---------------|---------------|
| C | -2.4676217033 | -2.6271195608 | -0.1527852364 |
| H | -1.2202841969 | -1.6562881356 | 1.3151197302  |
| H | -2.3531092227 | -3.3523050096 | -0.9703488849 |
| H | -2.839502059  | -1.7038808031 | -0.6131527403 |
| C | -3.4987204425 | -3.1380059791 | 0.8568575082  |
| H | -3.164602374  | -4.0683595049 | 1.3304832767  |
| H | -4.4659541228 | -3.3335121764 | 0.3821360281  |
| H | -3.6623045114 | -2.4022542384 | 1.652766492   |
| C | -3.0024076562 | 1.4075931727  | -0.5314338102 |
| H | -1.3466283561 | 2.0647339153  | -1.749054389  |
| H | -1.3015132519 | 2.6817344834  | -0.1039293124 |
| H | -3.6265913176 | 2.2497717039  | -0.8615344708 |
| C | -3.3947935834 | 1.019979841   | 0.8986019001  |
| H | -3.2322532383 | 0.5714493073  | -1.2053861305 |
| C | -4.8657370985 | 0.6130480255  | 1.0191673472  |
| H | -3.1824390495 | 1.8608402935  | 1.5733495405  |
| H | -2.7628944206 | 0.1896772006  | 1.2353026489  |
| H | -5.0817935608 | -0.2574077138 | 0.3890889688  |
| H | -5.5306769274 | 1.424579543   | 0.7018127223  |
| H | -5.1276654296 | 0.3498753033  | 2.0492576086  |
| C | 3.3233916025  | 0.7039404211  | 0.7513976151  |
| C | 2.4827575539  | 0.4381812947  | 2.0218286456  |
| H | 1.7851885854  | 1.2551402871  | 2.2281826884  |
| H | 1.89899515    | -0.4823683405 | 1.9182461956  |
| H | 3.1344534284  | 0.3303987658  | 2.8964700297  |
| C | 4.3144369863  | -0.462509227  | 0.5835534745  |
| H | 4.9827299709  | -0.5069639199 | 1.4496818194  |
| H | 3.8013880721  | -1.4272230763 | 0.5145615934  |
| H | 4.9358987916  | -0.3396422518 | -0.3094628388 |
| C | 4.1420783383  | 2.0012210493  | 0.9450832581  |
| H | 3.4921876546  | 2.8651857712  | 1.1114917895  |
| H | 4.8106021745  | 1.9116096365  | 1.8091987841  |
| H | 4.7533403084  | 2.2095149223  | 0.0607980843  |
| H | 4.7533403084  | 2.2095149223  | 0.0607980843  |

TS exo 0020

E(RB3LYP) = -706.415695884 A.U.

First frequency = -479.4873  $\text{cm}^{-1}$

|   |               |               |               |
|---|---------------|---------------|---------------|
| H | 1.1474134411  | -0.7267756002 | -3.2060880371 |
| C | 1.1967939635  | 0.022679687   | -2.4208902738 |
| H | 0.5975707552  | 0.9059084129  | -2.6067612733 |
| C | 2.2935773506  | 0.0499789687  | -1.5782089433 |
| C | 2.3629718652  | 0.8882927308  | -0.441117699  |
| C | 1.3162806017  | 1.7742010323  | -0.2259513832 |
| H | 1.2728735872  | 2.3719162911  | 0.6793498261  |
| H | 0.7866218824  | 2.2082936351  | -1.0640867752 |
| C | -0.5477124762 | 0.4767283552  | -0.0343169508 |
| H | -0.2443100504 | 0.2763322463  | 0.9908337738  |
| C | -1.5968223886 | 1.5523502237  | -0.2054527454 |
| C | -0.4398990038 | -0.5706036031 | -0.9456926309 |
| H | -1.1251079772 | -0.5682653704 | -1.7910903928 |
| C | 0.0892043495  | -1.9156442896 | -0.4979026781 |
| H | 3.0097592838  | -0.7587676208 | -1.6742239451 |
| H | 1.0359724896  | -1.7552046684 | 0.0330802822  |
| H | 0.3265458691  | -2.5379726336 | -1.369520978  |
| C | -0.8780983301 | -2.6817874947 | 0.4262284845  |
| H | -0.381569915  | -3.5934313681 | 0.7876188262  |
| C | -2.203882338  | -3.064563063  | -0.2410261741 |
| H | -1.0858872214 | -2.069211696  | 1.31405699    |
| H | -1.9964809317 | -3.6718823768 | -1.1331655307 |
| H | -2.7043841922 | -2.1564222513 | -0.5997319896 |
| C | -3.1437239314 | -3.8265867662 | 0.6970017234  |
| H | -2.6799564251 | -4.7531769237 | 1.0546603596  |
| H | -4.0820749896 | -4.0934380777 | 0.1996640987  |
| H | -3.3927620742 | -3.2223984933 | 1.5770281962  |
| C | -2.984492539  | 1.1031018711  | 0.2862980902  |
| H | -1.6669613934 | 1.8313094478  | -1.2667399519 |
| H | -1.3078427329 | 2.4637331516  | 0.3335108086  |
| H | -3.2943498223 | 0.2148754358  | -0.280221063  |
| C | -4.0558005487 | 2.1918676295  | 0.1626614096  |
| H | -2.9085575282 | 0.7810129008  | 1.3344310793  |
| C | -5.4330608239 | 1.7298891335  | 0.6473864623  |
| H | -4.1227234017 | 2.5150853542  | -0.8852578718 |
| H | -3.7409704995 | 3.0762036558  | 0.7333584617  |
| H | -6.1821873908 | 2.5223183091  | 0.5491345533  |
| H | -5.3992349026 | 1.4307923536  | 1.7012639376  |

|   |               |               |               |
|---|---------------|---------------|---------------|
| H | -5.7832198453 | 0.8655885266  | 0.0715277114  |
| C | 3.4286901515  | 0.6893754671  | 0.6576068934  |
| C | 2.745202411   | 0.2709274762  | 1.9798907381  |
| H | 2.2093375349  | -0.6763197195 | 1.8596513191  |
| H | 3.4915315187  | 0.140548121   | 2.7719296671  |
| H | 2.0265348801  | 1.0206678469  | 2.3233216002  |
| C | 4.4623527443  | -0.3920590195 | 0.292917402   |
| H | 5.2194306521  | -0.46023101   | 1.0809438506  |
| H | 4.0012946224  | -1.3800919223 | 0.193584375   |
| H | 4.9784299687  | -0.1584551419 | -0.6440246064 |
| C | 4.1863866012  | 2.0195736624  | 0.8754203894  |
| H | 4.9470000522  | 1.9084858072  | 1.6569695326  |
| H | 4.6870055185  | 2.3358422856  | -0.0456435695 |
| H | 3.5081950281  | 2.8226659468  | 1.1781475512  |
| H | 3.5081950281  | 2.8226659468  | 1.1781475512  |

TS exo 0029

E(RB3LYP) = -706.415658541 A.U.

First frequency = -488.3650 cm<sup>-1</sup>

|   |               |               |               |
|---|---------------|---------------|---------------|
| H | 0.8484066965  | -0.1769169059 | -3.3271265054 |
| C | 1.0302468415  | 0.4530683625  | -2.4604741351 |
| H | 0.63265815    | 1.457064096   | -2.5483643924 |
| C | 2.0966974854  | 0.1620901151  | -1.6259410924 |
| C | 2.3092185198  | 0.833147853   | -0.4004917571 |
| C | 1.4556308417  | 1.8817610581  | -0.08438729   |
| H | 1.5098923923  | 2.3694030977  | 0.8841974574  |
| H | 1.0472428109  | 2.5070069518  | -0.8677703977 |
| C | -0.639666184  | 0.9836643094  | -0.0504121667 |
| H | -0.4081518136 | 0.6200419559  | 0.9487529501  |
| C | -1.4452036431 | 2.2642131432  | -0.0996327906 |
| C | -0.703696843  | 0.033990834   | -1.0700596439 |
| H | -1.3643210296 | 0.2435761488  | -1.9090208547 |
| C | -0.4427824669 | -1.4232773939 | -0.7628753487 |
| H | 2.6350668954  | -0.7598666784 | -1.8168234624 |
| H | 0.4815485402  | -1.4955243608 | -0.1745133189 |
| H | -0.2586826803 | -1.9813650356 | -1.6888425922 |
| C | -1.5835975055 | -2.0996886822 | 0.0171776081  |



|   |               |               |               |
|---|---------------|---------------|---------------|
| H | -1.779696466  | -1.5312181557 | 0.9362899694  |
| C | -1.2843291644 | -3.5603453634 | 0.3720284993  |
| H | -2.5098127557 | -2.0506063178 | -0.572556013  |
| H | -0.3576067948 | -3.6040857961 | 0.960804497   |
| H | -1.0844239387 | -4.1237296178 | -0.5496583593 |
| C | -2.4203831727 | -4.2311648758 | 1.1493050377  |
| H | -2.1833162888 | -5.2718661993 | 1.3934891214  |
| H | -3.3500064785 | -4.2276502383 | 0.5687031621  |
| H | -2.6182984855 | -3.7039981538 | 2.0896543646  |
| C | -2.8553962103 | 2.1314261794  | 0.5146019793  |
| H | -1.5365342559 | 2.5977645995  | -1.1432450644 |
| H | -0.9183331113 | 3.0646610449  | 0.4338169788  |
| H | -2.7612437472 | 1.7598730022  | 1.5450429583  |
| C | -3.8149597264 | 1.2247507686  | -0.2629406845 |
| H | -3.297647234  | 3.1344242883  | 0.5929173211  |
| C | -5.2054121259 | 1.1510603671  | 0.3744312586  |
| H | -3.3898490877 | 0.2178755684  | -0.3321811605 |
| H | -3.8996925297 | 1.5924209811  | -1.2952039993 |
| H | -5.8757468543 | 0.5007962034  | -0.1971775314 |
| H | -5.6699624671 | 2.1422862558  | 0.4314571663  |
| H | -5.1485341911 | 0.7553878497  | 1.3951212085  |
| C | 3.2902504905  | 0.3016724246  | 0.6658619598  |
| C | 2.5125560854  | -0.106812378  | 1.9383546902  |
| H | 3.2030577509  | -0.4694518746 | 2.7084223314  |
| H | 1.9546172969  | 0.7322954697  | 2.3638213635  |
| H | 1.7984014874  | -0.9075182966 | 1.7198811313  |
| C | 4.08601939    | -0.9239851022 | 0.1809627363  |
| H | 4.6578119667  | -0.7018442051 | -0.7259261091 |
| H | 4.7968959303  | -1.2328997959 | 0.9542885748  |
| H | 3.4328368667  | -1.7779807357 | -0.0258398452 |
| C | 4.2999701199  | 1.4166461055  | 1.0238991169  |
| H | 3.7942290839  | 2.3043474796  | 1.4148576046  |
| H | 5.0076208474  | 1.0688590456  | 1.7854923241  |
| H | 4.8711425319  | 1.7205721787  | 0.1405109986  |
| H | 4.8711425319  | 1.7205721787  | 0.1405109986  |

TS exo 0033

E(RB3LYP) = -706.415098330 A.U.

First frequency =  $-491.7416 \text{ cm}^{-1}$

|   |               |               |               |
|---|---------------|---------------|---------------|
| H | 1.1312985364  | 0.0507293133  | -3.4119533146 |
| C | 1.1711740318  | 0.5814034076  | -2.4644170972 |
| H | 0.5945665729  | 1.4987024969  | -2.4432601903 |
| C | 2.2531611003  | 0.3822269999  | -1.6229362697 |
| C | 2.3069029621  | 0.9159593803  | -0.3158317518 |
| C | 1.2637238181  | 1.7389722191  | 0.0874402177  |
| H | 1.2023084573  | 2.0955228571  | 1.1111587591  |
| H | 0.7631761837  | 2.3770945248  | -0.6293455978 |
| C | -0.6131551587 | 0.4619922696  | -0.0986760764 |
| H | -0.3388294235 | 0.02220681    | 0.8559487244  |
| C | -1.6442287906 | 1.5678401007  | -0.045567357  |
| C | -0.4891452619 | -0.3384349657 | -1.2341747008 |
| H | -1.1627895497 | -0.1252703632 | -2.0642795514 |
| C | 0.0073619149  | -1.765197287  | -1.1472835728 |
| H | 2.9598512104  | -0.3917900981 | -1.9017290068 |
| H | 0.8319247688  | -1.8102054387 | -0.4239927459 |
| H | 0.4316939595  | -2.0685715657 | -2.1108765374 |
| C | -1.0743967445 | -2.7928576578 | -0.7512343402 |
| H | -1.9192897259 | -2.7141856239 | -1.4504191488 |
| C | -1.5964518947 | -2.6746129909 | 0.6848093278  |
| H | -0.6584768396 | -3.8004899851 | -0.8927206252 |
| H | -2.0632494942 | -1.6943573049 | 0.8261385453  |
| H | -0.7465029927 | -2.7120620145 | 1.3807793516  |
| C | -2.6024359052 | -3.773679652  | 1.0390595799  |
| H | -3.4734900602 | -3.7371294847 | 0.3745085115  |
| H | -2.964545184  | -3.6716297008 | 2.0674178696  |
| H | -2.1548646836 | -4.7693526891 | 0.9396448721  |
| C | -3.057221534  | 1.0525642299  | 0.2819099523  |
| H | -1.6713217862 | 2.0865811968  | -1.0149627555 |
| H | -1.3629998633 | 2.3237630447  | 0.698640006   |
| H | -3.3457441199 | 0.2997695469  | -0.4639344262 |
| C | -4.112368638  | 2.1630177832  | 0.3298906304  |
| H | -3.0354229948 | 0.5294941855  | 1.2483001498  |
| C | -5.5135845471 | 1.6396206342  | 0.6582246775  |
| H | -4.1303874412 | 2.6853622161  | -0.6364842359 |
| H | -3.8146806863 | 2.9134724161  | 1.0749152929  |

|   |               |               |               |
|---|---------------|---------------|---------------|
| H | -5.5285769728 | 1.1408147571  | 1.6340411859  |
| H | -5.8460788627 | 0.9100385564  | -0.0890179909 |
| H | -6.2504566244 | 2.4489663295  | 0.685670035   |
| C | 3.3407685506  | 0.4339129671  | 0.7236035055  |
| C | 4.3702046366  | -0.543277909  | 0.1268514175  |
| H | 4.9127353171  | -0.0958423392 | -0.712348611  |
| H | 5.1059953379  | -0.8168622402 | 0.890124101   |
| H | 3.8994687261  | -1.4677918125 | -0.2227736444 |
| C | 4.1081058694  | 1.6557087998  | 1.2796109852  |
| H | 4.6370225155  | 2.1794178475  | 0.4764988501  |
| H | 3.4314555522  | 2.3719269497  | 1.7547548974  |
| H | 4.8460437644  | 1.3423017405  | 2.0272396555  |
| C | 2.6176389491  | -0.284380438  | 1.8864260208  |
| H | 1.8987290342  | 0.3704822475  | 2.3872566882  |
| H | 2.0742469036  | -1.1636171052 | 1.5250466484  |
| H | 3.3412019337  | -0.6186357673 | 2.6387984226  |
| H | 3.3412019337  | -0.6186357673 | 2.6387984226  |

TS exo 0037

E(RB3LYP) = -706.415011516 A.U.

First frequency = -501.7573  $\text{cm}^{-1}$

|   |               |               |               |
|---|---------------|---------------|---------------|
| H | 0.9448001776  | -0.6535523371 | -3.1119549103 |
| C | 1.0048250999  | 0.0813862384  | -2.3136519466 |
| H | 0.378534708   | 0.9531607784  | -2.4643802438 |
| C | 2.1511480749  | 0.1471483773  | -1.53900356   |
| C | 2.2518030803  | 0.9655777125  | -0.3900817423 |
| C | 1.173311428   | 1.7844956224  | -0.0874570022 |
| H | 1.1444627238  | 2.3666814627  | 0.8256578934  |
| H | 0.5702341611  | 2.1959951164  | -0.8868031283 |
| C | -0.6025403703 | 0.3866414987  | 0.1602274332  |
| H | -0.2312631194 | 0.1325517501  | 1.1510082829  |
| C | -1.7045184287 | 1.4220755084  | 0.1242184622  |
| C | -0.5172971482 | -0.6007031884 | -0.8233709719 |
| H | -1.2611837179 | -0.5646230565 | -1.6176558828 |
| C | 0.0346575251  | -1.9688061605 | -0.4803814094 |
| H | 2.899721223   | -0.6276149032 | -1.6859064681 |
| H | 0.9880321532  | -1.8366640896 | 0.0433335245  |

|   |               |               |               |
|---|---------------|---------------|---------------|
| H | 0.2603863328  | -2.5271495787 | -1.3974444052 |
| C | -0.9090916427 | -2.8078908828 | 0.4037548746  |
| H | -0.3937507546 | -3.7324864504 | 0.700052057   |
| C | -2.2372645746 | -3.1708934758 | -0.2699522157 |
| H | -1.1146207193 | -2.2565101951 | 1.3314298062  |
| H | -2.0315519696 | -3.7188411341 | -1.2001099143 |
| H | -2.758088006  | -2.2518544181 | -0.5664800272 |
| C | -3.1522394221 | -4.0049629457 | 0.6306778805  |
| H | -4.0923978681 | -4.2573113188 | 0.1291845815  |
| H | -3.3997365777 | -3.4599918317 | 1.5489758612  |
| H | -2.6684405311 | -4.9433802893 | 0.9254146069  |
| C | -3.030145939  | 0.881152933   | 0.6941202857  |
| H | -1.8553194521 | 1.7493247986  | -0.9129335298 |
| H | -1.4172313911 | 2.3168418076  | 0.6919057875  |
| H | -3.3573368271 | 0.0277608079  | 0.0851193744  |
| C | -4.156990235  | 1.9226201905  | 0.7682300967  |
| H | -2.8407360383 | 0.481384403   | 1.699211789   |
| C | -4.6186215076 | 2.4398558133  | -0.5990883103 |
| H | -3.8273837926 | 2.7680051487  | 1.3878953498  |
| H | -5.0135019786 | 1.4779542238  | 1.2908287067  |
| H | -5.4653186721 | 3.1265634525  | -0.4980856467 |
| H | -4.9355300301 | 1.6116224041  | -1.2438295941 |
| H | -3.8208123685 | 2.9779408296  | -1.120981932  |
| C | 3.4311509236  | 0.7510256589  | 0.5801350409  |
| C | 4.7540987859  | 0.9802994516  | -0.1862680864 |
| H | 4.8632413315  | 0.2888744679  | -1.0266969101 |
| H | 4.8005597127  | 1.9991136519  | -0.5842789964 |
| H | 5.612178438   | 0.833307354   | 0.4796747696  |
| C | 3.3933454539  | 1.7291373814  | 1.7687993641  |
| H | 4.2728516161  | 1.5777794518  | 2.4032695289  |
| H | 3.3967190088  | 2.7709724413  | 1.432780084   |
| H | 2.5080973924  | 1.5742916906  | 2.3943505955  |
| C | 3.4128478656  | -0.6880279014 | 1.1467416922  |
| H | 3.4798985064  | -1.437807415  | 0.3534328861  |
| H | 4.2579378221  | -0.8452061953 | 1.8270797589  |
| H | 2.4898736211  | -0.8725306803 | 1.7064491903  |
| H | 2.4898736211  | -0.8725306803 | 1.7064491903  |

TS exo 0042

E(RB3LYP) = -706.415425517 A.U.

First frequency = -483.8772  $\text{cm}^{-1}$

|   |               |               |               |
|---|---------------|---------------|---------------|
| H | 0.8013809698  | -0.4544424732 | -3.3680244579 |
| C | 0.9415319307  | 0.1867434723  | -2.501934228  |
| H | 0.5092121588  | 1.1750183056  | -2.6029859565 |
| C | 1.9896818537  | -0.0676918274 | -1.6346516944 |
| C | 2.1480121031  | 0.6167172131  | -0.4074632864 |
| C | 1.2658477916  | 1.6519050855  | -0.1273786889 |
| H | 1.2827116531  | 2.1493662873  | 0.8375532647  |
| H | 0.8702856425  | 2.2629891853  | -0.9285636762 |
| C | -0.8036563984 | 0.7059729243  | -0.1409508882 |
| H | -0.5948583383 | 0.3787452833  | 0.8749468216  |
| C | -1.645226771  | 1.955527803   | -0.266126472  |
| C | -0.8218441105 | -0.2716243807 | -1.1330516524 |
| H | -1.4685527485 | -0.1042633112 | -1.9930050561 |
| C | -0.5099229824 | -1.7069741875 | -0.7810278639 |
| H | 2.5590139949  | -0.9752139814 | -1.8032929971 |
| H | 0.4253278811  | -1.7179011363 | -0.2097957908 |
| H | -0.3207731517 | -2.2928195085 | -1.6890891471 |
| C | -1.6209396225 | -2.38811217   | 0.0391092615  |
| H | -1.8117543319 | -1.7965162131 | 0.9446431507  |
| C | -1.2988075967 | -3.8373377447 | 0.4359690697  |
| H | -2.5544606963 | -2.3670303524 | -0.5386399128 |
| H | -1.1067505913 | -4.4279642283 | -0.4704168527 |
| H | -2.1857551482 | -4.2810188326 | 0.9060704547  |
| C | -0.1079465497 | -3.968606055  | 1.3936085726  |
| H | -0.2649938924 | -3.3676236012 | 2.2972570994  |
| H | 0.8259321675  | -3.6310905288 | 0.932618636   |
| H | 0.0383051842  | -5.0078199888 | 1.7057835502  |
| C | -3.1133771526 | 1.7187905853  | 0.1306881056  |
| H | -1.6092975009 | 2.3184405341  | -1.3035517613 |
| H | -1.2351471883 | 2.7616755702  | 0.3556573449  |
| H | -3.5326594474 | 0.9287236675  | -0.5064835134 |
| C | -3.97962596   | 2.9790700554  | 0.0307105961  |
| H | -3.1503184921 | 1.329470782   | 1.1579217967  |
| C | -5.4388051837 | 2.7332041313  | 0.4250412044  |

|   |               |               |               |
|---|---------------|---------------|---------------|
| H | -3.9354241432 | 3.3667173246  | -0.9963738872 |
| H | -3.5520520088 | 3.7638859705  | 0.6696041512  |
| H | -5.8980676163 | 1.9747282991  | -0.2191754527 |
| H | -6.0377160817 | 3.6462930618  | 0.3449106834  |
| H | -5.512200841  | 2.3751223021  | 1.4583159964  |
| C | 3.1011243455  | 0.1089954605  | 0.6958541516  |
| C | 4.0882803394  | 1.2389891282  | 1.0692263287  |
| H | 4.6832303035  | 1.5369259687  | 0.1995690926  |
| H | 3.5614726593  | 2.1264958292  | 1.4318700545  |
| H | 4.7756285628  | 0.9092016458  | 1.8569906146  |
| C | 2.2896511055  | -0.2916095428 | 1.9499406648  |
| H | 1.7081528628  | 0.5457675711  | 2.3462553682  |
| H | 1.5937472639  | -1.1059043952 | 1.7237931185  |
| H | 2.9615916966  | -0.6329981769 | 2.7456861957  |
| C | 3.9228678709  | -1.1155857269 | 0.2531965118  |
| H | 4.609103421   | -1.4092860044 | 1.054172145   |
| H | 3.2835814184  | -1.9774532638 | 0.0349527779  |
| H | 4.523832036   | -0.900400308  | -0.6363219084 |
| H | 4.523832036   | -0.900400308  | -0.6363219084 |

TS exo 0045

E(RB3LYP) = -706.415121598 A.U.

First frequency = -504.9326  $\text{cm}^{-1}$

|   |               |               |               |
|---|---------------|---------------|---------------|
| H | 0.9472757066  | -1.4466701354 | -2.763246915  |
| C | 1.04985583    | -0.5361753732 | -2.1786342197 |
| H | 0.5006307008  | 0.3098992595  | -2.5758703829 |
| C | 2.1846599476  | -0.3543702013 | -1.4044521671 |
| C | 2.3288735003  | 0.7247083544  | -0.502386339  |
| C | 1.313317679   | 1.6696111995  | -0.4627796466 |
| H | 1.3131656361  | 2.4685949455  | 0.2688371749  |
| H | 0.7618249246  | 1.9028951427  | -1.364542962  |
| C | -0.5809569661 | 0.515632703   | 0.0543916101  |
| H | -0.259091375  | 0.5109492662  | 1.0936962498  |
| C | -1.5885084683 | 1.5829090391  | -0.3112670446 |
| C | -0.5427805481 | -0.7017039899 | -0.6291543048 |
| H | -1.2645779284 | -0.8336947148 | -1.4341053216 |
| C | -0.0973449044 | -1.9602813234 | 0.0847952717  |

|   |               |               |               |
|---|---------------|---------------|---------------|
| H | 2.8715014877  | -1.1927934761 | -1.3179497665 |
| H | 0.8338087758  | -1.7446821976 | 0.6202677059  |
| H | 0.1463177154  | -2.7421791067 | -0.6428144754 |
| C | -1.1331063014 | -2.4953112222 | 1.0955610208  |
| H | -0.7099622389 | -3.3772838836 | 1.5970598455  |
| C | -2.4956578587 | -2.869717408  | 0.4913322928  |
| H | -1.2874808969 | -1.7370702422 | 1.874014054   |
| H | -2.9627393562 | -1.9722391814 | 0.0671443578  |
| H | -3.1580764095 | -3.2018244186 | 1.3007691394  |
| C | -2.4244273043 | -3.9612538151 | -0.5820350977 |
| H | -3.4244307521 | -4.2454493683 | -0.9256204756 |
| H | -1.9349383098 | -4.863051491  | -0.1957082153 |
| H | -1.8581746906 | -3.6299431391 | -1.4588571469 |
| C | -2.983128261  | 1.3135655099  | 0.2813319442  |
| H | -1.6735044251 | 1.6462485899  | -1.4058310265 |
| H | -1.2458591999 | 2.569159411   | 0.027157263   |
| H | -3.3524106299 | 0.3503327787  | -0.0943541645 |
| C | -4.0010450215 | 2.4136222923  | -0.0390148952 |
| H | -2.8969594606 | 1.1998797523  | 1.3711078528  |
| C | -5.3878611588 | 2.1308239802  | 0.5457122481  |
| H | -4.0767731649 | 2.5289114513  | -1.1290177534 |
| H | -3.6283395248 | 3.3741016937  | 0.3423506072  |
| H | -5.7951192141 | 1.1910445659  | 0.1556027326  |
| H | -6.0979998336 | 2.9283546509  | 0.3039299991  |
| H | -5.3439610286 | 2.0420354469  | 1.6372374175  |
| C | 3.4709301936  | 0.6871672047  | 0.5334578454  |
| C | 3.4922904729  | 1.9439539899  | 1.42281568    |
| H | 4.346133843   | 1.9012143852  | 2.1070285808  |
| H | 3.5848541744  | 2.8572075189  | 0.8263871367  |
| H | 2.5872213502  | 2.0246819056  | 2.0337830002  |
| C | 3.3280445353  | -0.5463746819 | 1.4553662943  |
| H | 2.3859436772  | -0.5069081821 | 2.0122254416  |
| H | 3.3441118596  | -1.4813607479 | 0.8883010313  |
| H | 4.1484645593  | -0.5818780357 | 2.1815857902  |
| C | 4.8204868103  | 0.6091043591  | -0.2167479933 |
| H | 5.6529094509  | 0.5819169285  | 0.4957961193  |
| H | 4.8883903236  | -0.2860982068 | -0.8414896662 |
| H | 4.9545010611  | 1.4801386708  | -0.8662779589 |

H 4.9545010611 1.4801386708 -0.8662779589

TS exo 0047

E(RB3LYP) = -706.415523883 A.U.

First frequency = -511.7221 cm<sup>-1</sup>

|   |               |               |               |
|---|---------------|---------------|---------------|
| H | 0.7602911031  | -0.2129050154 | -3.2646527815 |
| C | 0.9483585131  | 0.4087179862  | -2.3930560689 |
| H | 0.6111692076  | 1.4334573747  | -2.4999630084 |
| C | 1.9988557228  | 0.083903921   | -1.5474297971 |
| C | 2.2184465843  | 0.7434611137  | -0.3173896635 |
| C | 1.3857216015  | 1.8099861869  | -0.0058020341 |
| H | 1.4336163921  | 2.3015627673  | 0.9585070028  |
| H | 1.0062959553  | 2.4414494091  | -0.7990523973 |
| C | -0.7307857818 | 0.9856771979  | -0.0323710834 |
| H | -0.5459076498 | 0.5819696997  | 0.9613604089  |
| C | -1.484211913  | 2.2985259727  | -0.0621913204 |
| C | -0.8095723955 | 0.0658992427  | -1.0832904335 |
| H | -1.4508215181 | 0.3291578232  | -1.9228348176 |
| C | -0.6459009301 | -1.4114679006 | -0.7995741944 |
| H | 2.5125732649  | -0.857697588  | -1.7258346547 |
| H | 0.2467272996  | -1.5388312144 | -0.1797190846 |
| H | -0.4549172389 | -1.9617071364 | -1.7293300573 |
| C | -1.8590102934 | -2.0375544414 | -0.0876990214 |
| H | -2.0633229679 | -1.4772161497 | 0.8348879996  |
| C | -1.6804559218 | -3.5264188818 | 0.2488997905  |
| H | -2.7471995957 | -1.9149018617 | -0.7216722788 |
| H | -1.4653366053 | -4.083003227  | -0.6737327327 |
| H | -2.6325630696 | -3.9204033891 | 0.6267759762  |
| C | -0.5806425257 | -3.8025834899 | 1.2815294845  |
| H | -0.5356476557 | -4.866050075  | 1.5380926723  |
| H | -0.7651103919 | -3.243898262  | 2.2068878774  |
| H | 0.4081503121  | -3.5111661004 | 0.9138361936  |
| C | -2.9174764059 | 2.2068368398  | 0.5042114588  |
| H | -1.5290095186 | 2.6693278462  | -1.0963070084 |
| H | -0.9423952013 | 3.0590341791  | 0.5130851677  |
| H | -2.8729027406 | 1.7887619738  | 1.5200554707  |
| C | -3.894026736  | 1.3811241644  | -0.3394488821 |



|   |               |               |               |
|---|---------------|---------------|---------------|
| H | -3.3149220067 | 3.2256953781  | 0.6127374279  |
| C | -5.3057291885 | 1.348928343   | 0.2531415528  |
| H | -3.5156637721 | 0.3584905523  | -0.4394933016 |
| H | -3.9289061    | 1.7953584878  | -1.3568509523 |
| H | -5.7239975617 | 2.3584760001  | 0.3394816632  |
| H | -5.2998100231 | 0.9085599078  | 1.2569564585  |
| H | -5.9880905581 | 0.7568327769  | -0.3655176986 |
| C | 3.2039227521  | 0.1301428595  | 0.6986854718  |
| C | 4.6020190901  | 0.0475844991  | 0.0438369596  |
| H | 4.5944331778  | -0.5770729352 | -0.8540079332 |
| H | 4.9544091542  | 1.0429415005  | -0.2452831204 |
| H | 5.3275451188  | -0.3829547985 | 0.7436091934  |
| C | 3.3251928736  | 0.979569541   | 1.9772455114  |
| H | 3.6423349756  | 2.0027642349  | 1.7518858362  |
| H | 2.3777130565  | 1.0276941724  | 2.5240170455  |
| H | 4.0686261736  | 0.5375152015  | 2.6487534128  |
| C | 2.7518608202  | -1.2899218803 | 1.1130061843  |
| H | 3.4660473821  | -1.7311586258 | 1.8178735741  |
| H | 1.7722575477  | -1.2601126759 | 1.6012107723  |
| H | 2.6774592265  | -1.9600735265 | 0.2517370894  |
| H | 2.6774592265  | -1.9600735265 | 0.2517370894  |

TS exo 0049

E(RB3LYP) = -706.415408128 A.U.

First frequency = -504.2985  $\text{cm}^{-1}$

|   |               |               |               |
|---|---------------|---------------|---------------|
| H | 1.370215045   | -0.6162769324 | -3.2392341438 |
| C | 1.3063726938  | 0.1475634231  | -2.4687501644 |
| H | 0.8412977481  | 1.0703043294  | -2.7967195988 |
| C | 2.2211243326  | 0.1354465243  | -1.4278712042 |
| C | 2.1186309807  | 0.9961324827  | -0.310810293  |
| C | 1.0988427354  | 1.9369558665  | -0.3164304814 |
| H | 0.9030574555  | 2.5639293661  | 0.5451346184  |
| H | 0.7710588991  | 2.3678676672  | -1.2537617066 |
| C | -0.8275659014 | 0.7409739117  | -0.5097021705 |
| H | -0.7446862094 | 0.5114081982  | 0.5496019372  |
| C | -1.7503689723 | 1.8840457347  | -0.8736149389 |
| C | -0.6017169089 | -0.3052906646 | -1.4067443304 |

|   |               |               |               |
|---|---------------|---------------|---------------|
| H | -1.120007245  | -0.2495609382 | -2.3639919762 |
| C | -0.3044677198 | -1.6992893156 | -0.900141915  |
| H | 2.8906208768  | -0.7185660198 | -1.3598516924 |
| H | 0.4753178381  | -1.6383749318 | -0.1317448515 |
| H | 0.1080092481  | -2.3170103609 | -1.707477764  |
| C | -1.5374686762 | -2.4025541173 | -0.307205784  |
| H | -1.9279589352 | -1.8024680468 | 0.5255093368  |
| C | -1.2408597791 | -3.8236778863 | 0.184153946   |
| H | -2.339290197  | -2.4335964892 | -1.0584642843 |
| H | -0.4331106933 | -3.7855262457 | 0.9279942858  |
| H | -0.8546173732 | -4.422753625  | -0.6518150528 |
| C | -2.4660729237 | -4.514502136  | 0.7895673191  |
| H | -2.8516091132 | -3.9510475245 | 1.6470495622  |
| H | -2.2301514746 | -5.5267125979 | 1.1341268562  |
| H | -3.2767632826 | -4.5917486199 | 0.0559814527  |
| C | -3.2470007623 | 1.5366234107  | -0.7217359342 |
| H | -1.5672350495 | 2.1741771934  | -1.9173616265 |
| H | -1.5219569962 | 2.7692615711  | -0.2691199469 |
| H | -3.8408445395 | 2.4099091141  | -1.0265320428 |
| C | -3.6715022504 | 1.1117059275  | 0.6930482673  |
| H | -3.4920886222 | 0.7288928153  | -1.4230009361 |
| C | -3.3854372323 | 2.1602343366  | 1.7734945587  |
| H | -3.1700787056 | 0.1723155164  | 0.9558297119  |
| H | -4.7456257268 | 0.8877883105  | 0.681095156   |
| H | -3.7811585092 | 1.8460389499  | 2.744734167   |
| H | -3.8444926474 | 3.1234237186  | 1.5212915299  |
| H | -2.3105881324 | 2.3303124784  | 1.8971554384  |
| C | 2.9767274821  | 0.7078442545  | 0.9379263033  |
| C | 2.6436186948  | -0.6883440894 | 1.5140772657  |
| H | 3.2619873371  | -0.8998153336 | 2.394218934   |
| H | 1.5931473499  | -0.7412864729 | 1.8191027961  |
| H | 2.8213171798  | -1.4822292406 | 0.7832103571  |
| C | 4.4693827145  | 0.7513727366  | 0.5379545778  |
| H | 4.7080149258  | 0.0078516195  | -0.2279065743 |
| H | 4.7363790987  | 1.7362570103  | 0.141403712   |
| H | 5.1044221525  | 0.5488379695  | 1.4080568832  |
| C | 2.7511563741  | 1.7466771325  | 2.0519515819  |
| H | 3.4150140132  | 1.5363837337  | 2.8969891132  |

|   |              |              |              |
|---|--------------|--------------|--------------|
| H | 2.9623715271 | 2.7626077144 | 1.7032679099 |
| H | 1.7235211715 | 1.7213196819 | 2.4292621177 |
| H | 1.7235211715 | 1.7213196819 | 2.4292621177 |

TS exo 0055

E(RB3LYP) = -706.416099516 A.U.

First frequency = -501.0026 cm<sup>-1</sup>

|   |               |               |               |
|---|---------------|---------------|---------------|
| H | 1.4946363604  | -0.929358257  | -3.0792742294 |
| C | 1.3903492111  | -0.0992393154 | -2.385654778  |
| H | 0.8264016173  | 0.7392656771  | -2.7782792819 |
| C | 2.341598995   | 0.0767149644  | -1.3938820921 |
| C | 2.2030027252  | 1.033821389   | -0.3619667693 |
| C | 1.1024934756  | 1.8777260027  | -0.4117619601 |
| H | 0.8853576112  | 2.5714609402  | 0.3914710657  |
| H | 0.7046152675  | 2.1818979294  | -1.3712944491 |
| C | -0.7165046738 | 0.5140241445  | -0.3982196752 |
| H | -0.5831456523 | 0.4069082399  | 0.6752040997  |
| C | -1.7417059368 | 1.5367783609  | -0.8410901649 |
| C | -0.432065996  | -0.6006888185 | -1.1893546246 |
| H | -0.9803798238 | -0.6867917682 | -2.1260101294 |
| C | 0.0175052824  | -1.899851084  | -0.5514705887 |
| H | 3.0917310454  | -0.7015111221 | -1.2760136956 |
| H | 0.8895114026  | -1.6951686642 | 0.0792767663  |
| H | 0.3542130015  | -2.5982714879 | -1.3277498669 |
| C | -1.0632924956 | -2.580492485  | 0.3113713828  |
| H | -0.6347872074 | -3.4802104795 | 0.7750802383  |
| C | -2.3316078956 | -2.9668525106 | -0.4568334665 |
| H | -1.3337084079 | -1.9107859198 | 1.1390585563  |
| H | -2.0642516923 | -3.6497254713 | -1.2752039971 |
| H | -2.7539575253 | -2.0725043231 | -0.9308246862 |
| C | -3.3924509442 | -3.6149881785 | 0.436595766   |
| H | -3.007220543  | -4.5225309863 | 0.9156415912  |
| H | -4.2862101652 | -3.8910967957 | -0.1325372674 |
| H | -3.7034746078 | -2.9284597899 | 1.2326200811  |
| C | -3.201831562  | 1.0528134127  | -0.7025608883 |
| H | -1.5655291725 | 1.7922787379  | -1.8951472769 |
| H | -1.6126420676 | 2.4683506894  | -0.2783980643 |

|   |               |               |               |
|---|---------------|---------------|---------------|
| H | -3.8703227406 | 1.8662999754  | -1.0178751584 |
| C | -3.6004219361 | 0.590764491   | 0.7074127586  |
| H | -3.3651160018 | 0.2257772516  | -1.4050290008 |
| C | -3.4239196437 | 1.6624076462  | 1.7882669379  |
| H | -3.0145048974 | -0.2965309604 | 0.9749075904  |
| H | -4.6484069413 | 0.2662608785  | 0.6848912018  |
| H | -3.9748962991 | 2.5754807031  | 1.5338825722  |
| H | -2.371391149  | 1.9376348851  | 1.9147689207  |
| H | -3.7898749239 | 1.3109222799  | 2.7583681703  |
| C | 3.1363201199  | 0.955435062   | 0.8632834048  |
| C | 2.9752102179  | -0.4035191001 | 1.5840139205  |
| H | 1.9484810814  | -0.5333786256 | 1.9419563013  |
| H | 3.2096710762  | -1.2435972443 | 0.9242131123  |
| H | 3.6451869128  | -0.4623294755 | 2.4496697597  |
| C | 4.5984091546  | 1.1080806524  | 0.3846074718  |
| H | 4.7449000969  | 2.0713075245  | -0.1146633002 |
| H | 5.2869658958  | 1.0552680189  | 1.235789054   |
| H | 4.8801553193  | 0.3208508299  | -0.3205479466 |
| C | 2.8501270194  | 2.0706395052  | 1.8857782836  |
| H | 3.5646225846  | 2.0089281874  | 2.7132118763  |
| H | 2.943442215   | 3.0637788676  | 1.4349406258  |
| H | 1.8458967748  | 1.9819273396  | 2.3132674676  |
| H | 1.8458967748  | 1.9819273396  | 2.3132674676  |

TS exo 0058

E(RB3LYP) = -706.415904423 A.U.

First frequency = -501.4214  $\text{cm}^{-1}$

|   |               |               |               |
|---|---------------|---------------|---------------|
| H | 1.1804786632  | -1.4532078313 | -2.7614184925 |
| C | 1.234341518   | -0.5189737831 | -2.2086509029 |
| H | 0.750272293   | 0.3165898429  | -2.7017646209 |
| C | 2.2773215217  | -0.3200081429 | -1.3182812114 |
| C | 2.3415445287  | 0.7964581195  | -0.4526486583 |
| C | 1.3538107459  | 1.7633068869  | -0.5752848895 |
| H | 1.2887122028  | 2.596006457   | 0.1145646171  |
| H | 0.9191264416  | 1.96461495    | -1.5456942872 |
| C | -0.6198715456 | 0.6694174325  | -0.2386749452 |
| H | -0.4176312104 | 0.7185743086  | 0.8277429702  |

|   |               |               |               |
|---|---------------|---------------|---------------|
| C | -1.541085952  | 1.7359597889  | -0.7956341535 |
| C | -0.5297217037 | -0.5841233669 | -0.8465810762 |
| H | -1.1564310001 | -0.7492172906 | -1.7219555074 |
| C | -0.1923890132 | -1.8107572201 | -0.0250619689 |
| H | 2.9327574755  | -1.1641895368 | -1.1184306515 |
| H | 0.7205250933  | -1.6088249487 | 0.5457104795  |
| H | 0.0439512853  | -2.6502761215 | -0.6883145422 |
| C | -1.3017347638 | -2.225913093  | 0.9647064248  |
| H | -0.9684174097 | -3.1229045414 | 1.5056236649  |
| C | -2.672552914  | -2.5025308978 | 0.3286808787  |
| H | -1.4149146652 | -1.4353925604 | 1.7177448378  |
| H | -3.052142622  | -1.5788177052 | -0.1243049605 |
| H | -3.3821306158 | -2.7639469226 | 1.1240351225  |
| C | -2.6582927101 | -3.6162500293 | -0.7235683657 |
| H | -2.0386347064 | -3.3480211702 | -1.5858146178 |
| H | -3.6668910692 | -3.823528489  | -1.095760285  |
| H | -2.2574539008 | -4.5479557276 | -0.3073245797 |
| C | -3.0380996354 | 1.4467421967  | -0.5633357093 |
| H | -1.3721000658 | 1.8293858691  | -1.8775978377 |
| H | -1.2925762627 | 2.7120325143  | -0.3602399897 |
| H | -3.6326806918 | 2.2424711288  | -1.0337223957 |
| C | -3.4335502406 | 1.329528381   | 0.9125099529  |
| H | -3.3045037648 | 0.5166094088  | -1.08289419   |
| C | -4.9218914749 | 1.0257646318  | 1.1032037888  |
| H | -3.1727063966 | 2.2619860726  | 1.4321103948  |
| H | -2.8392124306 | 0.5385148039  | 1.3852537185  |
| H | -5.5472897919 | 1.8063874825  | 0.6548966467  |
| H | -5.1860429518 | 0.9535213351  | 2.1632929555  |
| H | -5.1891139329 | 0.0749042982  | 0.6278117388  |
| C | 3.3557008927  | 0.7858320986  | 0.7093316454  |
| C | 4.7809330071  | 0.6595461432  | 0.1235979865  |
| H | 5.5253820703  | 0.6499839054  | 0.9280223339  |
| H | 4.9038210252  | -0.2610373444 | -0.4541208084 |
| H | 5.004286344   | 1.5017550384  | -0.5392187207 |
| C | 3.2967215786  | 2.077275487   | 1.5457615838  |
| H | 2.3280264055  | 2.1956081245  | 2.0423499661  |
| H | 4.0637109396  | 2.0500311085  | 2.326771334   |
| H | 3.4759509158  | 2.964254273   | 0.9297873944  |

|   |              |               |              |
|---|--------------|---------------|--------------|
| C | 3.0862955653 | -0.4070125578 | 1.6561279613 |
| H | 3.8149949599 | -0.4211172273 | 2.4749694713 |
| H | 2.0858889278 | -0.3349320805 | 2.0956442041 |
| H | 3.1551668494 | -1.3648289906 | 1.1327917362 |
| H | 3.1551668494 | -1.3648289906 | 1.1327917362 |

TS exo 0064

E(RB3LYP) = -706.415676366 A.U.

First frequency = -483.0893  $\text{cm}^{-1}$

|   |               |               |               |
|---|---------------|---------------|---------------|
| H | 1.1052690188  | -0.5140042419 | -3.3902225687 |
| C | 1.1829496593  | 0.1733174495  | -2.5520984971 |
| H | 0.8163753765  | 1.1719603157  | -2.7581527247 |
| C | 2.1169063202  | -0.0725001933 | -1.5605383218 |
| C | 2.1767946327  | 0.6805776504  | -0.3651972754 |
| C | 1.3264756417  | 1.7716952003  | -0.2461151672 |
| H | 1.2640991189  | 2.3278903428  | 0.6842127999  |
| H | 1.0521221908  | 2.3475064151  | -1.120591369  |
| C | -0.7781011565 | 0.9169047583  | -0.4383897591 |
| H | -0.6880494605 | 0.6458394204  | 0.609595325   |
| C | -1.528208331  | 2.1969232695  | -0.7379972116 |
| C | -0.7381517003 | -0.119435037  | -1.3682264464 |
| H | -1.2786982804 | 0.0216461163  | -2.3029832854 |
| C | -0.5423730449 | -1.5426705001 | -0.9015698533 |
| H | 2.653765738   | -1.0133837489 | -1.6119973587 |
| H | 0.3261511005  | -1.5620058235 | -0.2334937551 |
| H | -0.2917983473 | -2.1932051837 | -1.7487420435 |
| C | -1.7678691525 | -2.117273487  | -0.1673077726 |
| H | -2.0112945566 | -1.4685969874 | 0.6850694445  |
| C | -1.5736827104 | -3.5576918092 | 0.3312581593  |
| H | -2.6370127211 | -2.0764984371 | -0.8370380264 |
| H | -1.3295066724 | -4.2069914775 | -0.5208016951 |
| H | -2.5274478411 | -3.9254108277 | 0.730764553   |
| C | -0.4923888575 | -3.7003110891 | 1.4096032447  |
| H | 0.5008468839  | -3.441731959  | 1.0286687748  |
| H | -0.4408724237 | -4.7266464593 | 1.7874156437  |
| H | -0.7002990592 | -3.0412826603 | 2.2610327607  |
| C | -3.0578642014 | 2.0555129436  | -0.5997303482 |

|   |               |               |               |
|---|---------------|---------------|---------------|
| H | -1.2960237795 | 2.5167143629  | -1.763325729  |
| H | -1.1846156064 | 3.0035623742  | -0.0778105275 |
| H | -3.533689589  | 2.9925997142  | -0.9214066691 |
| C | -3.5266247956 | 1.718533527   | 0.8204161183  |
| H | -3.4067473366 | 1.2753583535  | -1.2896220891 |
| C | -5.0503055331 | 1.6185948589  | 0.9332576232  |
| H | -3.1525439955 | 2.4835905422  | 1.5150805388  |
| H | -3.0754303638 | 0.7702426148  | 1.1373986523  |
| H | -5.4418091317 | 0.8379475099  | 0.2709221545  |
| H | -5.5308384809 | 2.5621370694  | 0.6498623201  |
| H | -5.3641299241 | 1.3775705489  | 1.954197144   |
| C | 2.9754324951  | 0.2001153959  | 0.8655070359  |
| C | 2.0109991381  | -0.0851281431 | 2.0404879114  |
| H | 2.5726725217  | -0.4064851625 | 2.925075131   |
| H | 1.4335520999  | 0.800594594   | 2.3204886254  |
| H | 1.3029833197  | -0.8797703959 | 1.7837614261  |
| C | 3.7768016819  | -1.085212     | 0.5885110552  |
| H | 4.355042664   | -1.3588975317 | 1.4770261536  |
| H | 3.1220544872  | -1.9296673419 | 0.3490365788  |
| H | 4.482003304   | -0.9527389489 | -0.2384462847 |
| C | 3.9724607041  | 1.3054337466  | 1.2837128236  |
| H | 4.6741034014  | 1.5220195018  | 0.4714281861  |
| H | 3.4555550441  | 2.2364327153  | 1.5341199086  |
| H | 4.5509583084  | 0.9941940149  | 2.1613293166  |
| H | 4.5509583084  | 0.9941940149  | 2.1613293166  |

TS exo 0066

E(RB3LYP) = -706.414618560 A.U.

First frequency = -503.1102  $\text{cm}^{-1}$

|   |              |               |               |
|---|--------------|---------------|---------------|
| H | 0.9944322441 | -0.2514812988 | -3.2907164568 |
| C | 1.002321507  | 0.3605044933  | -2.3925967301 |
| H | 0.4936128866 | 1.311772609   | -2.4997463749 |
| C | 2.0204424629 | 0.190550743   | -1.4682284204 |
| C | 2.0242574621 | 0.8335280602  | -0.2088346408 |
| C | 0.9997749095 | 1.7306570657  | 0.0577129613  |
| H | 0.8877798722 | 2.187708899   | 1.0335269328  |
| H | 0.5717770632 | 2.3122179341  | -0.7488490886 |

|   |               |               |               |
|---|---------------|---------------|---------------|
| C | -0.9283285587 | 0.5373654496  | -0.1580511738 |
| H | -0.7443319836 | 0.1321418041  | 0.8346574149  |
| C | -1.9043837074 | 1.6907645591  | -0.220964414  |
| C | -0.7769431156 | -0.3335067715 | -1.2387725299 |
| H | -1.3915678135 | -0.1388150388 | -2.1174567511 |
| C | -0.3968285225 | -1.7769423462 | -0.9968828536 |
| H | 2.7035463063  | -0.6410320895 | -1.6234393081 |
| H | 0.4596815129  | -1.7943094872 | -0.3158524968 |
| H | -0.0587628859 | -2.2471764794 | -1.9288714937 |
| C | -1.5478050023 | -2.6084245219 | -0.4016534972 |
| H | -1.8791367773 | -2.1407695812 | 0.5354819737  |
| C | -1.1819372148 | -4.077419843  | -0.1384802323 |
| H | -2.408199629  | -2.5639518862 | -1.0827815067 |
| H | -0.8483235619 | -4.5414932506 | -1.0769447372 |
| H | -2.0871751556 | -4.6193925933 | 0.1638886725  |
| C | -0.1041869747 | -4.2656103334 | 0.9363628803  |
| H | 0.8506486344  | -3.8204404632 | 0.6395426434  |
| H | 0.0758976188  | -5.3269328264 | 1.1364193938  |
| H | -0.4070186013 | -3.7951323596 | 1.8794276782  |
| C | -3.3547210115 | 1.2426614391  | 0.0437046558  |
| H | -1.854408819  | 2.1592688764  | -1.214943365  |
| H | -1.6231279861 | 2.4663710127  | 0.5000791063  |
| H | -3.6099687229 | 0.454975768   | -0.6760950519 |
| C | -4.3918055345 | 2.3729013361  | -0.0456615866 |
| H | -3.4089031523 | 0.7754422443  | 1.037314833   |
| C | -4.2402053643 | 3.4524274926  | 1.0323917678  |
| H | -5.3954021343 | 1.934622265   | 0.0267174632  |
| H | -4.3336115758 | 2.8371053877  | -1.0399559519 |
| H | -3.2892393615 | 3.9871806117  | 0.943155668   |
| H | -4.2788601655 | 3.011652378   | 2.0355002609  |
| H | -5.0413188556 | 4.1956067557  | 0.9638912269  |
| C | 3.0139273656  | 0.354443815   | 0.8731039469  |
| C | 2.7707559207  | -1.1347721787 | 1.2139378203  |
| H | 2.882019284   | -1.7760521619 | 0.3348658874  |
| H | 3.4859299829  | -1.4786912003 | 1.9701462172  |
| H | 1.7617747253  | -1.2833339314 | 1.6124896489  |
| C | 4.4546577113  | 0.5255197867  | 0.3390817628  |
| H | 5.1823712483  | 0.1934246317  | 1.088458966   |



|   |              |               |               |
|---|--------------|---------------|---------------|
| H | 4.6239678007 | -0.0581032769 | -0.5703545487 |
| H | 4.6595355072 | 1.5751202498  | 0.1047725634  |
| C | 2.8891055083 | 1.1647441905  | 2.1764109794  |
| H | 1.9067580703 | 1.0353845529  | 2.642477192   |
| H | 3.6406566999 | 0.8275472886  | 2.8978618134  |
| H | 3.0467698034 | 2.2338484817  | 2.0018932512  |
| H | 3.0467698034 | 2.2338484817  | 2.0018932512  |

TS exo 0068

E(RB3LYP) = -706.415590958 A.U.

First frequency = -489.9941  $\text{cm}^{-1}$

|   |               |               |               |
|---|---------------|---------------|---------------|
| H | 0.7828247537  | 0.0549065245  | -3.3514594532 |
| C | 0.9603728944  | 0.5982312653  | -2.4271554654 |
| H | 0.5974111492  | 1.6189410872  | -2.4334307393 |
| C | 1.9902124325  | 0.1941390793  | -1.5935234307 |
| C | 2.1859910998  | 0.7418191093  | -0.3057276604 |
| C | 1.365147147   | 1.7956695481  | 0.0760922715  |
| H | 1.407506475   | 2.194416267   | 1.0851363785  |
| H | 1.0165901084  | 2.5072509114  | -0.6614504841 |
| C | -0.7567430315 | 0.9964378159  | -0.0249963505 |
| H | -0.5741538512 | 0.5561493782  | 0.9531643903  |
| C | -1.5167179954 | 2.305242371   | -0.009415946  |
| C | -0.8225348202 | 0.1210439251  | -1.1094868417 |
| H | -1.4548595752 | 0.4044627472  | -1.948187142  |
| C | -0.5901036855 | -1.35666044   | -0.8934075242 |
| H | 2.5009536914  | -0.7269510374 | -1.8523343893 |
| H | 0.3395675448  | -1.4696822578 | -0.3244346668 |
| H | -0.4248529874 | -1.8628644564 | -1.8524731451 |
| C | -1.7365529854 | -2.0592328886 | -0.1430191124 |
| H | -1.9176915065 | -1.537809764  | 0.8066156609  |
| C | -1.4739728402 | -3.54758118   | 0.1360805503  |
| H | -2.6609062621 | -1.9579579962 | -0.7269349698 |
| H | -1.2898215635 | -4.068038367  | -0.8138646275 |
| H | -2.3840838192 | -3.9942614508 | 0.5563501295  |
| C | -0.3041913084 | -3.8033727278 | 1.094573339   |
| H | -0.2028775908 | -4.8696549917 | 1.3215787834  |
| H | -0.4524045827 | -3.2729301458 | 2.0427673225  |

|   |               |               |               |
|---|---------------|---------------|---------------|
| H | 0.6492522117  | -3.46650309   | 0.6750392448  |
| C | -2.9462928498 | 2.1823380856  | 0.5600367543  |
| H | -1.5684896635 | 2.7088919707  | -1.0307224094 |
| H | -0.9775112188 | 3.050069903   | 0.588510825   |
| H | -2.8913384015 | 1.7502902759  | 1.569513766   |
| C | -3.9108930741 | 1.3512048832  | -0.2921953517 |
| H | -3.3603106258 | 3.1926922952  | 0.684419678   |
| C | -5.3212437359 | 1.2905649862  | 0.3013557484  |
| H | -3.5160287184 | 0.3357042368  | -0.4044387332 |
| H | -3.9532990697 | 1.7760404873  | -1.3049363216 |
| H | -5.3072719698 | 0.8406202261  | 1.3008403924  |
| H | -5.9947442567 | 0.693756414   | -0.3224554641 |
| H | -5.7554847513 | 2.2924073436  | 0.3979512399  |
| C | 3.1041943281  | 0.073200324   | 0.7394359561  |
| C | 3.8427634906  | -1.1566524166 | 0.1801927892  |
| H | 3.1473485648  | -1.949739402  | -0.1141886116 |
| H | 4.4575066188  | -0.8998693221 | -0.6886200465 |
| H | 4.5072772641  | -1.568907792  | 0.9464707588  |
| C | 4.1636835248  | 1.0976709938  | 1.2071786095  |
| H | 4.7761367182  | 1.4342229534  | 0.3641623999  |
| H | 3.6958512342  | 1.9808083413  | 1.652140439   |
| H | 4.8285913925  | 0.6535857771  | 1.9571581985  |
| C | 2.2704296114  | -0.3870213401 | 1.9579555891  |
| H | 2.9202381912  | -0.8431651836 | 2.7135394298  |
| H | 1.7461687788  | 0.446348811   | 2.4343395835  |
| H | 1.5221012171  | -1.1300137923 | 1.6641191113  |
| H | 1.5221012171  | -1.1300137923 | 1.6641191113  |

TS exo 0081

E(RB3LYP) = -706.415593890 A.U.

First frequency = -520.5752 cm<sup>-1</sup>

|   |              |              |               |
|---|--------------|--------------|---------------|
| H | 1.3674538955 | -0.48412984  | -3.3777011511 |
| C | 1.3406119083 | 0.1912715655 | -2.5263801823 |
| H | 0.8889701935 | 1.15334789   | -2.7415384232 |
| C | 2.2954304598 | 0.0557153156 | -1.5282485053 |
| C | 2.2439166484 | 0.7928258895 | -0.3251277478 |
| C | 1.2368745702 | 1.7406884685 | -0.1995086251 |

|   |               |               |               |
|---|---------------|---------------|---------------|
| H | 1.0744313277  | 2.2729852578  | 0.7301431724  |
| H | 0.8972557409  | 2.2793240033  | -1.0750407624 |
| C | -0.7072957422 | 0.604506406   | -0.471344935  |
| H | -0.607232743  | 0.2864855696  | 0.5615142938  |
| C | -1.6152708128 | 1.792075984   | -0.7222579109 |
| C | -0.5146809248 | -0.3643036598 | -1.4638885099 |
| H | -1.063888691  | -0.2197200321 | -2.3952970051 |
| C | -0.2130600957 | -1.8083658804 | -1.1147267831 |
| H | 2.9506425004  | -0.8106321297 | -1.5759895613 |
| H | 0.4317631411  | -1.8333711208 | -0.2304327855 |
| H | 0.3676679775  | -2.2724236566 | -1.9197600878 |
| C | -1.465166222  | -2.6825528327 | -0.8824312433 |
| H | -2.0800049771 | -2.6590974405 | -1.7925991573 |
| C | -2.3449421726 | -2.3054996433 | 0.3179603473  |
| H | -1.1347095835 | -3.7243885727 | -0.7653298999 |
| H | -3.2211723873 | -2.9665116816 | 0.3266538459  |
| H | -2.7309765153 | -1.2912485986 | 0.1794072965  |
| C | -1.6362116867 | -2.4015438554 | 1.6728362637  |
| H | -0.800627502  | -1.697948969  | 1.7463163345  |
| H | -1.2314977353 | -3.4071456359 | 1.8366898561  |
| H | -2.3243191125 | -2.1797061117 | 2.4952699124  |
| C | -3.1054302592 | 1.5004132327  | -0.4516113899 |
| H | -1.4976019568 | 2.1090398395  | -1.7674942163 |
| H | -1.3134629259 | 2.6488345814  | -0.1059098954 |
| H | -3.711842966  | 2.3302592352  | -0.840290589  |
| C | -3.4346565951 | 1.3052284957  | 1.0340917557  |
| H | -3.4046707432 | 0.6085970051  | -1.0183553992 |
| C | -4.8934198653 | 0.9060609267  | 1.2706074341  |
| H | -3.2093688081 | 2.2352913602  | 1.5735574346  |
| H | -2.7772033808 | 0.5399998154  | 1.4640239059  |
| H | -5.1188556406 | -0.049982177  | 0.7841776231  |
| H | -5.5808060661 | 1.6550758618  | 0.8608479995  |
| H | -5.1141873478 | 0.7976510975  | 2.3374902589  |
| C | 3.1299096404  | 0.3591608481  | 0.8602621227  |
| C | 4.6103766835  | 0.3894682405  | 0.4167576377  |
| H | 5.262923406   | 0.0867930808  | 1.2437243265  |
| H | 4.8000056106  | -0.2882046083 | -0.4204566515 |
| H | 4.9010075543  | 1.3972040424  | 0.1028530992  |

|   |              |               |              |
|---|--------------|---------------|--------------|
| C | 2.9773534641 | 1.2949154169  | 2.07370179   |
| H | 3.6625640383 | 0.9866128983  | 2.8702576966 |
| H | 3.2092775245 | 2.3323857149  | 1.8125406688 |
| H | 1.9633159442 | 1.2647060832  | 2.4856428911 |
| C | 2.761701366  | -1.0731368409 | 1.3128792525 |
| H | 1.7229388661 | -1.1158254261 | 1.657438068  |
| H | 2.8755767175 | -1.7969620335 | 0.5010925773 |
| H | 3.404234675  | -1.3935074955 | 2.1412660999 |
| H | 3.404234675  | -1.3935074955 | 2.1412660999 |

TS exo 0083

E(RB3LYP) = -706.416152690 A.U.

First frequency = -478.0771  $\text{cm}^{-1}$

|   |               |               |               |
|---|---------------|---------------|---------------|
| H | 1.4127717111  | -1.1558115592 | -3.1318403183 |
| C | 1.363568252   | -0.2981808957 | -2.4664813706 |
| H | 0.8140961784  | 0.5464373589  | -2.8646597942 |
| C | 2.3273656069  | -0.1453927065 | -1.4858833114 |
| C | 2.2490723891  | 0.8519336142  | -0.4857399487 |
| C | 1.2071461534  | 1.765895902   | -0.564081118  |
| H | 1.0462108558  | 2.4926787588  | 0.2263021329  |
| H | 0.8234453957  | 2.0741195517  | -1.5279470913 |
| C | -0.6966032292 | 0.5223046211  | -0.4644072695 |
| H | -0.5519390317 | 0.4911157508  | 0.6121048615  |
| C | -1.6680242079 | 1.5655511566  | -0.9734567426 |
| C | -0.4828272731 | -0.6598914621 | -1.1682343112 |
| H | -1.03714982   | -0.7953097637 | -2.0947286578 |
| C | -0.0482420121 | -1.9145677631 | -0.4412946206 |
| H | 3.0326750011  | -0.9590805552 | -1.3566051845 |
| H | 0.8603600448  | -1.6879561345 | 0.1306232565  |
| H | 0.2293144337  | -2.6893766498 | -1.1665560811 |
| C | -1.1112721755 | -2.4746921033 | 0.5245905911  |
| H | -0.695230387  | -3.3471400387 | 1.047856355   |
| C | -2.4259523071 | -2.8740851616 | -0.1539568825 |
| H | -1.320142047  | -1.7249838744 | 1.2998193094  |
| H | -2.2211431128 | -3.6372765383 | -0.9175524443 |
| H | -2.8332041035 | -2.0076647504 | -0.6894364134 |
| C | -3.4706854468 | -3.3953191408 | 0.8361989396  |

|   |               |               |               |
|---|---------------|---------------|---------------|
| H | -4.3982698911 | -3.6831802084 | 0.3305818763  |
| H | -3.7203684623 | -2.6284632941 | 1.5787310136  |
| H | -3.099842332  | -4.2720801008 | 1.3795967069  |
| C | -3.1490098021 | 1.1767700617  | -0.7705071056 |
| H | -1.4988925776 | 1.7260663287  | -2.047109199  |
| H | -1.4751376151 | 2.5293449639  | -0.4886424245 |
| H | -3.7799028557 | 2.0001225743  | -1.1338285712 |
| C | -3.5376568294 | 0.8446959723  | 0.6786131626  |
| H | -3.3731173626 | 0.3089997413  | -1.4037715053 |
| C | -3.2694913169 | 1.9796310265  | 1.6725265212  |
| H | -2.9990241025 | -0.0550127789 | 0.9992604977  |
| H | -4.6033563541 | 0.5844349804  | 0.7028475715  |
| H | -3.6318327701 | 1.7236917694  | 2.6733941713  |
| H | -3.7699796375 | 2.9043142104  | 1.361948578   |
| H | -2.1993018347 | 2.1968637258  | 1.7568827282  |
| C | 3.1302738695  | 0.8120892609  | 0.7808143823  |
| C | 3.8840724048  | 2.1551980139  | 0.9171668874  |
| H | 4.5132797524  | 2.1566733019  | 1.8147991237  |
| H | 4.5280014077  | 2.3281974255  | 0.0486007009  |
| H | 3.1911919424  | 2.9984073499  | 0.9909899254  |
| C | 2.2416748838  | 0.5984516443  | 2.0282579055  |
| H | 2.8548624181  | 0.5818419918  | 2.9365555691  |
| H | 1.501469183   | 1.3954967406  | 2.1441782056  |
| H | 1.7025943653  | -0.3524877406 | 1.9655121767  |
| C | 4.1752864859  | -0.3180163025 | 0.7416876883  |
| H | 4.8347218207  | -0.2290632023 | -0.1277988987 |
| H | 4.8011793809  | -0.2737858721 | 1.638942025   |
| H | 3.7057916318  | -1.3067624181 | 0.7166131716  |
| H | 3.7057916318  | -1.3067624181 | 0.7166131716  |

TS exo 0084

E(RB3LYP) = -706.415901842 A.U.

First frequency = -478.3251 cm<sup>-1</sup>

|   |              |               |               |
|---|--------------|---------------|---------------|
| H | 1.1220387497 | -1.5433997779 | -2.8313737542 |
| C | 1.211646018  | -0.6097102513 | -2.2827301318 |
| H | 0.7271273294 | 0.2357141248  | -2.7568011625 |
| C | 2.2575277618 | -0.4458715928 | -1.3917716617 |

|   |               |               |               |
|---|---------------|---------------|---------------|
| C | 2.3590108324  | 0.6708416282  | -0.5295181628 |
| C | 1.4154535059  | 1.6799705715  | -0.6636883645 |
| H | 1.3907773034  | 2.5127522768  | 0.0324109239  |
| H | 0.9925450857  | 1.9061372028  | -1.633693669  |
| C | -0.6025797506 | 0.6739946547  | -0.2944458999 |
| H | -0.3842234955 | 0.7652457379  | 0.7657098065  |
| C | -1.4936022068 | 1.7441822928  | -0.8906406281 |
| C | -0.5556565598 | -0.6036849685 | -0.8454464034 |
| H | -1.1874790491 | -0.7975871308 | -1.710384972  |
| C | -0.1989980203 | -1.7944590422 | 0.0163047904  |
| H | 2.8816905068  | -1.3117064157 | -1.1995720212 |
| H | 0.7452941834  | -1.5808110058 | 0.5324127759  |
| H | -0.0073973298 | -2.6690975988 | -0.6149290613 |
| C | -1.2669119085 | -2.1377979921 | 1.0769658514  |
| H | -0.9260756745 | -3.0143134237 | 1.6459941869  |
| C | -2.6709596094 | -2.414357514  | 0.5178643451  |
| H | -1.3295547122 | -1.3087964682 | 1.7936028878  |
| H | -3.0508972878 | -1.5054722101 | 0.035657561   |
| H | -3.3486237405 | -2.6194343211 | 1.3563799018  |
| C | -2.727997398  | -3.5790680566 | -0.4761175036 |
| H | -3.7566634985 | -3.7811626841 | -0.7919517118 |
| H | -2.3281153629 | -4.4979851175 | -0.0314846966 |
| H | -2.1430079717 | -3.3682917086 | -1.3776134136 |
| C | -2.9951195449 | 1.5124855642  | -0.62483858   |
| H | -1.3358713459 | 1.7819233504  | -1.9775727727 |
| H | -1.2080753628 | 2.7303962453  | -0.503455662  |
| H | -3.5734283734 | 2.3021808411  | -1.1246621782 |
| C | -3.3707318536 | 1.4777161565  | 0.8606091775  |
| H | -3.2961241663 | 0.5664508049  | -1.0946195287 |
| C | -4.8645775755 | 1.2305526322  | 1.0867713811  |
| H | -3.0731629621 | 2.4250172264  | 1.3313354063  |
| H | -2.7938492282 | 0.6915091847  | 1.3623566348  |
| H | -5.4725421024 | 2.0086124043  | 0.6108839703  |
| H | -5.1140251455 | 1.2166485415  | 2.1527705394  |
| H | -5.1687149651 | 0.267337603   | 0.6609752078  |
| C | 3.3281388558  | 0.6915409689  | 0.6717430492  |
| C | 4.2296885561  | 1.9439292226  | 0.5735653827  |
| H | 4.9251703622  | 1.9878097711  | 1.4197823179  |

|   |              |               |               |
|---|--------------|---------------|---------------|
| H | 4.8169435369 | 1.9273548228  | -0.3504717377 |
| H | 3.6387492022 | 2.8644423801  | 0.5758553705  |
| C | 2.5244068534 | 0.7458257336  | 1.9916105904  |
| H | 3.2031299496 | 0.774989531   | 2.8517077243  |
| H | 1.8855838633 | 1.6321060654  | 2.0449932333  |
| H | 1.8834050679 | -0.1357764639 | 2.0954359215  |
| C | 4.2398458148 | -0.5482938408 | 0.720563367   |
| H | 3.6665823236 | -1.4706569379 | 0.8595485939  |
| H | 4.8353581507 | -0.6486718209 | -0.192696789  |
| H | 4.9348889194 | -0.4628987741 | 1.5622313541  |
| H | 4.9348889194 | -0.4628987741 | 1.5622313541  |

TS exo 0088

E(RB3LYP) = -706.413984219 A.U.

First frequency = -502.1631  $\text{cm}^{-1}$

|   |               |               |               |
|---|---------------|---------------|---------------|
| H | 0.5414223947  | -0.8258528996 | -3.0526505724 |
| C | 0.7181825042  | -0.056075621  | -2.3060691371 |
| H | 0.2289782609  | 0.8878455631  | -2.5178204113 |
| C | 1.8698356494  | -0.1108854696 | -1.5379997334 |
| C | 2.1040840844  | 0.7598627252  | -0.4486912438 |
| C | 1.1646118921  | 1.7512265399  | -0.2047213605 |
| H | 1.2315603896  | 2.3917604745  | 0.6663766564  |
| H | 0.6222584918  | 2.1927979304  | -1.0310021746 |
| C | -0.8029505108 | 0.6540617017  | 0.1319155148  |
| H | -0.4664532112 | 0.4231810587  | 1.1405718082  |
| C | -1.7399767043 | 1.8347126209  | 0.0096841911  |
| C | -0.8681362899 | -0.4051495482 | -0.7751926031 |
| H | -1.6124276023 | -0.3267907522 | -1.5675823593 |
| C | -0.520233572  | -1.8097503922 | -0.3343366376 |
| H | 2.4912187156  | -0.9983592274 | -1.6304653463 |
| H | 0.4238483182  | -1.7820963603 | 0.2234615558  |
| H | -0.3425574212 | -2.4437948989 | -1.2094041811 |
| C | -1.6078799198 | -2.4394181549 | 0.5559970671  |
| H | -1.7988028409 | -1.7664191653 | 1.4014099804  |
| C | -1.2496735928 | -3.8349152658 | 1.0902869523  |
| H | -2.5508832811 | -2.4940431643 | -0.0066988165 |
| H | -2.0193238132 | -4.1458557607 | 1.8084114417  |

|   |               |               |               |
|---|---------------|---------------|---------------|
| H | -0.3109662811 | -3.7708676474 | 1.6580415832  |
| C | -1.1169963108 | -4.9093458259 | 0.0048160765  |
| H | -0.2937253901 | -4.6928604694 | -0.6833146908 |
| H | -2.0352947759 | -4.9800554056 | -0.5900240009 |
| H | -0.9273541666 | -5.8945502858 | 0.4433929158  |
| C | -3.1314957971 | 1.535088725   | 0.5997126704  |
| H | -1.8392891819 | 2.104664289   | -1.049996178  |
| H | -1.3247167548 | 2.7162339499  | 0.5154727467  |
| H | -3.572992349  | 0.6894362823  | 0.0553114851  |
| C | -4.0983028229 | 2.7287346134  | 0.5744502324  |
| H | -3.0047509762 | 1.1953712993  | 1.6362955654  |
| C | -4.4767001835 | 3.1958554344  | -0.8358415875 |
| H | -3.6536860378 | 3.5655728296  | 1.1306504525  |
| H | -5.0114843461 | 2.4536492723  | 1.1175186398  |
| H | -3.6087064478 | 3.5727456054  | -1.386249725  |
| H | -5.2175653806 | 4.0012365672  | -0.8012850088 |
| H | -4.9057405933 | 2.372279462   | -1.4186830891 |
| C | 3.2454127825  | 0.4349264638  | 0.536366935   |
| C | 3.3710428454  | 1.4899747497  | 1.6509190534  |
| H | 2.479036063   | 1.5192725229  | 2.2852846603  |
| H | 4.2231832196  | 1.2507049936  | 2.29562355    |
| H | 3.5313075592  | 2.4918265311  | 1.2398931715  |
| C | 3.0094769764  | -0.9393756662 | 1.2057223065  |
| H | 3.8278124414  | -1.1780551984 | 1.8950083855  |
| H | 2.0759646944  | -0.9364267626 | 1.7782599949  |
| H | 2.9484426295  | -1.7451104419 | 0.4688008414  |
| C | 4.5807372366  | 0.4002948956  | -0.2418857795 |
| H | 5.4118484253  | 0.1709026804  | 0.434891668   |
| H | 4.5741568034  | -0.358808894  | -1.0292721268 |
| H | 4.7804792834  | 1.3680435276  | -0.7131690165 |
| H | 4.7804792834  | 1.3680435276  | -0.7131690165 |

TS exo 0098

E(RB3LYP) = -706.415286198 A.U.

First frequency = -506.0105 cm<sup>-1</sup>

|   |              |               |               |
|---|--------------|---------------|---------------|
| H | 1.2053153659 | -0.6890414461 | -3.2846402763 |
| C | 1.1902237739 | 0.0605781165  | -2.4978191028 |



|   |               |               |               |
|---|---------------|---------------|---------------|
| H | 0.7965106993  | 1.0216122565  | -2.8088061739 |
| C | 2.0929994684  | -0.0410680503 | -1.4510313863 |
| C | 2.0430219592  | 0.7993879868  | -0.3152364803 |
| C | 1.0981443923  | 1.8159249598  | -0.3100560773 |
| H | 0.9400833851  | 2.4369336206  | 0.5635205715  |
| H | 0.8180771951  | 2.2923764753  | -1.2408616118 |
| C | -0.9129822359 | 0.7818170225  | -0.5543330287 |
| H | -0.8657691287 | 0.5400199443  | 0.5042998083  |
| C | -1.7389258155 | 1.9944930064  | -0.924343273  |
| C | -0.7516209147 | -0.2731911663 | -1.4552970223 |
| H | -1.2560481615 | -0.1801343009 | -2.4168936342 |
| C | -0.543822907  | -1.6818359176 | -0.9457905917 |
| H | 2.6977353411  | -0.9431494246 | -1.3975657425 |
| H | 0.2440006514  | -1.6574830247 | -0.1867924536 |
| H | -0.1751725844 | -2.3293313136 | -1.7513966706 |
| C | -1.8181192766 | -2.3032748772 | -0.3457633927 |
| H | -2.168973204  | -1.671582431  | 0.4814336771  |
| C | -1.6285195907 | -3.7417183523 | 0.1601347777  |
| H | -2.6149289623 | -2.2842373989 | -1.1011690791 |
| H | -1.2747070412 | -4.3728153072 | -0.6668305616 |
| H | -2.6056974897 | -4.145404361  | 0.454622234   |
| C | -0.6611072127 | -3.8601098536 | 1.3442709384  |
| H | -0.6092157566 | -4.8896970493 | 1.7131426277  |
| H | -0.9835459204 | -3.2234127336 | 2.1768074628  |
| H | 0.3549231803  | -3.5562538796 | 1.0735154781  |
| C | -3.260259486  | 1.7620813984  | -0.8006886548 |
| H | -1.515631286  | 2.2773900762  | -1.9622769154 |
| H | -1.4537519423 | 2.8549566173  | -0.3082862822 |
| H | -3.7799131853 | 2.6812027346  | -1.1061772067 |
| C | -3.7401290036 | 1.3580992579  | 0.6024525239  |
| H | -3.5545801105 | 0.9819897312  | -1.5141903477 |
| C | -3.3912973628 | 2.3707074062  | 1.6986050028  |
| H | -3.317755325  | 0.3799185282  | 0.8627738938  |
| H | -4.8280971151 | 1.2189169527  | 0.5710183946  |
| H | -3.769671164  | 3.3691659409  | 1.449616298   |
| H | -2.3086688845 | 2.4551920922  | 1.8410770044  |
| H | -3.8263665084 | 2.0790821734  | 2.65999968    |
| C | 2.8667636049  | 0.4222431882  | 0.9332800494  |

|   |              |               |               |
|---|--------------|---------------|---------------|
| C | 4.3628538777 | 0.3785801124  | 0.5460879194  |
| H | 4.6967696478 | 1.353688557   | 0.1770614293  |
| H | 4.9754643126 | 0.1131145682  | 1.4153712008  |
| H | 4.5592295972 | -0.359251442  | -0.2371180606 |
| C | 2.6981612517 | 1.4444329923  | 2.0724187724  |
| H | 3.3355505163 | 1.1673509313  | 2.9185534456  |
| H | 2.982182273  | 2.4524222991  | 1.753728135   |
| H | 1.6663604295 | 1.4790853668  | 2.4374599296  |
| C | 2.4395461991 | -0.9636508035 | 1.4714900277  |
| H | 2.5701329613 | -1.7487186659 | 0.7211857813  |
| H | 3.0378369947 | -1.2375965742 | 2.3481736579  |
| H | 1.3864337508 | -0.957341529  | 1.7712420756  |
| H | 1.3864337508 | -0.957341529  | 1.7712420756  |

TS exo 0108

E(RB3LYP) = -706.415512674 A.U.

First frequency = -521.5358 cm<sup>-1</sup>

|   |               |               |               |
|---|---------------|---------------|---------------|
| H | 0.8005071057  | -0.5751582491 | -3.0599182687 |
| C | 0.9515106471  | 0.1728581865  | -2.285764737  |
| H | 0.4439444067  | 1.1118017501  | -2.4754952716 |
| C | 2.1113650095  | 0.1284403934  | -1.5240515702 |
| C | 2.3174104923  | 0.9644996152  | -0.4051644726 |
| C | 1.3378104264  | 1.9090398161  | -0.1267764884 |
| H | 1.3778181171  | 2.5189322404  | 0.7679181344  |
| H | 0.7924721812  | 2.3662460178  | -0.9423392315 |
| C | -0.6006291234 | 0.7627054851  | 0.1501725935  |
| H | -0.2721194455 | 0.5182606209  | 1.1589249933  |
| C | -1.5693070547 | 1.9250456671  | 0.0520911659  |
| C | -0.6008974892 | -0.2799384439 | -0.7855862948 |
| H | -1.3394630957 | -0.2226779567 | -1.5826015835 |
| C | -0.1696085757 | -1.673575219  | -0.3705325661 |
| H | 2.7609226063  | -0.7344651984 | -1.6496288306 |
| H | 0.7477780959  | -1.5854927215 | 0.2210726388  |
| H | 0.091363567   | -2.2683730232 | -1.2545663631 |
| C | -1.2266405035 | -2.4380296017 | 0.4494468912  |
| H | -0.7744594709 | -3.3548439488 | 0.8529080619  |
| C | -2.4772807011 | -2.8166512206 | -0.3538171143 |

|   |               |               |               |
|---|---------------|---------------|---------------|
| H | -1.5150287942 | -1.8317195252 | 1.3187533042  |
| H | -2.1845778929 | -3.4884367669 | -1.1723245059 |
| H | -2.8952483175 | -1.9226729775 | -0.8314619109 |
| C | -3.5572302004 | -3.4812018342 | 0.5036642695  |
| H | -3.1763683109 | -4.3870216341 | 0.9893882817  |
| H | -4.4301348076 | -3.7639904174 | -0.0938522802 |
| H | -3.8995176752 | -2.80270829   | 1.2936745462  |
| C | -2.8078566916 | 1.7858048173  | 0.9649745219  |
| H | -1.8844806593 | 2.0462731705  | -0.9924466775 |
| H | -1.0756106985 | 2.8654296351  | 0.3268564271  |
| H | -2.4618857522 | 1.7298744303  | 2.006069004   |
| C | -3.722934426  | 0.5861757069  | 0.6836355544  |
| H | -3.3960778101 | 2.7110117117  | 0.888290777   |
| C | -4.3671636062 | 0.5984165214  | -0.7057832011 |
| H | -4.5137214998 | 0.5672656173  | 1.4444819007  |
| H | -3.1534800996 | -0.3392523979 | 0.8125659113  |
| H | -4.9397794198 | 1.5191031644  | -0.8683927899 |
| H | -5.0507676895 | -0.2476983061 | -0.8307561955 |
| H | -3.6171628765 | 0.5327322853  | -1.5003859972 |
| C | 3.478952393   | 0.6567630293  | 0.5616814673  |
| C | 4.8076190093  | 0.7140820051  | -0.2267830109 |
| H | 5.6548206678  | 0.5020786268  | 0.4355784288  |
| H | 4.8300945133  | -0.0169309626 | -1.0400924789 |
| H | 4.9561769871  | 1.7060029552  | -0.6655737064 |
| C | 3.5629503386  | 1.6761724779  | 1.7126174583  |
| H | 3.6751071785  | 2.6983295979  | 1.3372132116  |
| H | 2.6739963514  | 1.6420308469  | 2.3510483641  |
| H | 4.4287254618  | 1.4532899783  | 2.3449196448  |
| C | 3.3157063106  | -0.7501024282 | 1.1823842667  |
| H | 4.154262094   | -0.9755734033 | 1.8515046718  |
| H | 2.3921291945  | -0.810951407  | 1.7675819386  |
| H | 3.2807043228  | -1.5304798416 | 0.4170152575  |
| H | 3.2807043228  | -1.5304798416 | 0.4170152575  |

TS exo 0112

E(RB3LYP) = -706.415603734 A.U.

First frequency = -500.2161  $\text{cm}^{-1}$

|   |               |               |               |
|---|---------------|---------------|---------------|
| H | 0.807150579   | -0.3044645165 | -3.1884191519 |
| C | 0.955329362   | 0.372861207   | -2.351481369  |
| H | 0.4253862637  | 1.3134701182  | -2.4417983207 |
| C | 2.1045335085  | 0.2560493145  | -1.5848029564 |
| C | 2.2994928454  | 0.9885384235  | -0.39333715   |
| C | 1.3265751219  | 1.91790306    | -0.0465471241 |
| H | 1.3711019898  | 2.4411932235  | 0.9038454038  |
| H | 0.7940033929  | 2.4573971672  | -0.8188021043 |
| C | -0.6181409138 | 0.7579556846  | 0.1433154342  |
| H | -0.2825698665 | 0.4647023575  | 1.1363417519  |
| C | -1.5996233184 | 1.9125462241  | 0.1086192953  |
| C | -0.6056478913 | -0.229276017  | -0.8452526393 |
| H | -1.3361372012 | -0.1430749625 | -1.6463183257 |
| C | -0.115578369  | -1.6250698116 | -0.5186129304 |
| H | 2.7504436428  | -0.5909095549 | -1.7891972773 |
| H | 0.8248660263  | -1.5348753552 | 0.0383681092  |
| H | 0.1256238212  | -2.1673859436 | -1.4409908377 |
| C | -1.113825728  | -2.4589018473 | 0.307618346   |
| H | -0.6209967553 | -3.3812839723 | 0.6454301002  |
| C | -2.3886583047 | -2.8306563069 | -0.4598339277 |
| H | -1.3793591436 | -1.9029959024 | 1.2169056998  |
| H | -2.1162285153 | -3.4548542413 | -1.3218758274 |
| H | -2.8463766038 | -1.9250127152 | -0.8748811107 |
| C | -3.4150692986 | -3.5622781715 | 0.4086408222  |
| H | -3.7388041826 | -2.9309600383 | 1.2442806503  |
| H | -2.9930489353 | -4.4804012635 | 0.8334370245  |
| H | -4.3060209478 | -3.8380737458 | -0.1650293514 |
| C | -2.8140259946 | 1.7210693159  | 1.0441581404  |
| H | -1.9402884228 | 2.0679143864  | -0.923200845  |
| H | -1.1108164472 | 2.8482763559  | 0.407228259   |
| H | -2.4437602108 | 1.6452685436  | 2.0755993022  |
| C | -3.7062013399 | 0.5071091093  | 0.7498857951  |
| H | -3.4251646417 | 2.6336272293  | 1.0054691526  |
| C | -4.3767682452 | 0.5392540048  | -0.6266330912 |
| H | -4.4814160184 | 0.4504461766  | 1.524735081   |
| H | -3.1128540599 | -0.4079168137 | 0.8445360792  |
| H | -5.0432936071 | -0.3189847684 | -0.7608245158 |
| H | -3.6401549967 | 0.510835182   | -1.4357437872 |

|   |               |               |               |
|---|---------------|---------------|---------------|
| H | -4.9729908318 | 1.450298717   | -0.7551334523 |
| C | 3.4141908576  | 0.638003426   | 0.6143414191  |
| C | 4.3354781986  | -0.4882095618 | 0.1109749865  |
| H | 5.1320345466  | -0.668170407  | 0.8403024219  |
| H | 3.7923892583  | -1.4294382994 | -0.0227773723 |
| H | 4.8097379351  | -0.2275341166 | -0.8407864259 |
| C | 4.2828117723  | 1.8934340031  | 0.8605528854  |
| H | 4.7448525687  | 2.2341562401  | -0.0718772021 |
| H | 3.687026218   | 2.7202171343  | 1.2583059239  |
| H | 5.08208364    | 1.6771148473  | 1.5789783055  |
| C | 2.7899057062  | 0.1825008291  | 1.9534691265  |
| H | 2.1800795688  | -0.7162485179 | 1.8153379316  |
| H | 3.5754649519  | -0.0498818287 | 2.6815719056  |
| H | 2.1522974233  | 0.9556367732  | 2.3917671258  |
| H | 2.1522974233  | 0.9556367732  | 2.3917671258  |

TS exo 0116

E(RB3LYP) = -706.415091843 A.U.

First frequency = -498.1060  $\text{cm}^{-1}$

|   |               |               |               |
|---|---------------|---------------|---------------|
| H | 0.6085584534  | 0.5145201852  | -3.2920210988 |
| C | 0.803560172   | 0.9304043864  | -2.3069999514 |
| H | 0.304481499   | 1.8732862387  | -2.1164492941 |
| C | 1.9687048066  | 0.5775543982  | -1.6438271418 |
| C | 2.2220440088  | 0.9534504663  | -0.3066384342 |
| C | 1.2955024179  | 1.7816582995  | 0.3145133219  |
| H | 1.3862977422  | 2.0217971384  | 1.3695409549  |
| H | 0.7609288049  | 2.5275429583  | -0.2594744948 |
| C | -0.6761876487 | 0.6532875806  | 0.2429573728  |
| H | -0.3177687748 | 0.0949161401  | 1.1032982182  |
| C | -1.6049401299 | 1.8069317067  | 0.5568265754  |
| C | -0.7388044938 | -0.0245370987 | -0.9769759055 |
| H | -1.4899000309 | 0.3081566769  | -1.6914098422 |
| C | -0.3220713523 | -1.4752741882 | -1.0951785554 |
| H | 2.578331408   | -0.1979394985 | -2.0946009792 |
| H | 0.5981470236  | -1.6277071766 | -0.5163948097 |
| H | -0.065552473  | -1.6982965532 | -2.1367864956 |
| C | -1.3879692345 | -2.4920673225 | -0.6321120792 |

|   |               |               |               |
|---|---------------|---------------|---------------|
| H | -2.3336184094 | -2.2862663968 | -1.1539081326 |
| C | -1.641067941  | -2.537345954  | 0.8789432525  |
| H | -1.0752637632 | -3.4926977773 | -0.9624126758 |
| H | -1.9710711202 | -1.5542849702 | 1.2300383943  |
| H | -0.692525118  | -2.742550877  | 1.3947072609  |
| C | -2.6826302979 | -3.5896451918 | 1.2698879462  |
| H | -2.3727633092 | -4.592639632  | 0.9544872855  |
| H | -3.6479667233 | -3.3787431049 | 0.7952018714  |
| H | -2.8429894089 | -3.6145154638 | 2.352736949   |
| C | -2.9701760552 | 1.3710801916  | 1.1373816215  |
| H | -1.7623745108 | 2.4060968596  | -0.349767613  |
| H | -1.1352920514 | 2.4795553833  | 1.2844276684  |
| H | -2.7858981393 | 0.7608504285  | 2.0318032711  |
| C | -3.8912019015 | 0.5961747932  | 0.182724445   |
| H | -3.4995233113 | 2.2694321892  | 1.4848685995  |
| C | -4.3530008601 | 1.4060322044  | -1.0334633886 |
| H | -4.7720672826 | 0.2641193289  | 0.7467815842  |
| H | -3.3861240444 | -0.3144688544 | -0.1568598799 |
| H | -5.0578151451 | 0.8334089795  | -1.6450669263 |
| H | -3.5140124374 | 1.686600393   | -1.6786522822 |
| H | -4.853179965  | 2.3314895433  | -0.7247271316 |
| C | 3.3429810273  | 0.3025290887  | 0.530558713   |
| C | 2.7265945726  | -0.4954043304 | 1.7029483768  |
| H | 3.5158782876  | -0.950094236  | 2.3125320849  |
| H | 2.1269801263  | 0.1408421774  | 2.3602954399  |
| H | 2.0799754716  | -1.297765836  | 1.3328504503  |
| C | 4.2152022943  | -0.6611912491 | -0.2947429574 |
| H | 3.6383932671  | -1.5127314794 | -0.6699950785 |
| H | 4.6773615696  | -0.1565557063 | -1.1494599628 |
| H | 5.0206040621  | -1.0591907121 | 0.3311403465  |
| C | 4.2597849739  | 1.4112268611  | 1.0971867264  |
| H | 3.7016828234  | 2.1088825446  | 1.7284031554  |
| H | 5.0637026136  | 0.9773571936  | 1.7031932741  |
| H | 4.7167635529  | 1.9880736071  | 0.2863731943  |
| H | 4.7167635529  | 1.9880736071  | 0.2863731943  |

TS<sub>exo</sub> 0117

E(RB3LYP) = -706.414487654 A.U.

First frequency =  $-515.4923 \text{ cm}^{-1}$

|   |               |               |               |
|---|---------------|---------------|---------------|
| H | 1.1478727194  | 0.1298992972  | -3.3558838602 |
| C | 1.1008124668  | 0.6052907234  | -2.379492822  |
| H | 0.5093110915  | 1.5139532089  | -2.3594979763 |
| C | 2.1409346004  | 0.4083490996  | -1.4828599489 |
| C | 2.0901193216  | 0.8673810389  | -0.1480707208 |
| C | 0.9821618933  | 1.6135455601  | 0.2308837567  |
| H | 0.8294759519  | 1.915350258   | 1.2602059612  |
| H | 0.5038940768  | 2.2643652172  | -0.4899334621 |
| C | -0.821349201  | 0.293534402   | -0.183950314  |
| H | -0.6122558197 | -0.211589763  | 0.7545847042  |
| C | -1.8864283889 | 1.3676470933  | -0.1319282936 |
| C | -0.5826319724 | -0.4138084681 | -1.366996777  |
| H | -1.2140497849 | -0.1585429934 | -2.2189900804 |
| C | -0.0746693507 | -1.8404890305 | -1.3474694921 |
| H | 2.9003783825  | -0.3227308094 | -1.7490686242 |
| H | 0.6875753156  | -1.9366620003 | -0.5673836482 |
| H | 0.4343925537  | -2.0642113688 | -2.2918252736 |
| C | -1.1776762459 | -2.9032409805 | -1.1443113937 |
| H | -1.9335146882 | -2.7763509848 | -1.9313921914 |
| C | -1.8787424064 | -2.9046931563 | 0.2226214019  |
| H | -0.7300407995 | -3.8936353513 | -1.3092541691 |
| H | -2.6741603759 | -3.6607601086 | 0.2006438274  |
| H | -2.3780420896 | -1.9427234728 | 0.3799638915  |
| C | -0.9467277602 | -3.1978589661 | 1.4031957314  |
| H | -1.5061622119 | -3.2669616085 | 2.3419175227  |
| H | -0.1913363745 | -2.4156275363 | 1.5298818475  |
| H | -0.4142318118 | -4.1455062598 | 1.2603669676  |
| C | -3.3095205706 | 0.7963779178  | 0.0168117314  |
| H | -1.8436237423 | 1.9661286669  | -1.0541900964 |
| H | -1.6844628317 | 2.0598061939  | 0.6929744376  |
| H | -3.4842131895 | 0.0817417533  | -0.7971400495 |
| C | -4.4192643794 | 1.8593289251  | 0.0086435116  |
| H | -3.3682191757 | 0.2180627132  | 0.9497348843  |
| C | -4.379474684  | 2.8187212874  | 1.2038009347  |
| H | -5.3917091878 | 1.3509184511  | -0.0091554033 |
| H | -4.3593876011 | 2.4346451477  | -0.9256369128 |

|   |               |               |               |
|---|---------------|---------------|---------------|
| H | -5.2280934579 | 3.5102393747  | 1.184613759   |
| H | -3.465957106  | 3.4217208828  | 1.2123231403  |
| H | -4.4202605425 | 2.2665742209  | 2.1500945849  |
| C | 3.1281076665  | 0.3433001875  | 0.865062946   |
| C | 3.0319031793  | -1.1944645468 | 0.996749235   |
| H | 3.7874063181  | -1.5694474067 | 1.696931316   |
| H | 2.0477669733  | -1.4903095627 | 1.3746740582  |
| H | 3.1871613072  | -1.6959525893 | 0.037495114   |
| C | 4.5419493465  | 0.7247044149  | 0.3692898376  |
| H | 5.303120687   | 0.3664762071  | 1.0719247412  |
| H | 4.7615452597  | 0.2889239751  | -0.6095677821 |
| H | 4.6421510388  | 1.8112906639  | 0.2808349871  |
| C | 2.9336274987  | 0.9519853003  | 2.2659903042  |
| H | 3.7189488464  | 0.5938177406  | 2.9398087481  |
| H | 2.9853377313  | 2.0451454275  | 2.2404140006  |
| H | 1.9715755363  | 0.6652771333  | 2.7033441905  |
| H | 1.9715755363  | 0.6652771333  | 2.7033441905  |

TS exo 0119

E(RB3LYP) = -706.414419895 A.U.

First frequency = -512.4794 cm<sup>-1</sup>

|   |               |               |               |
|---|---------------|---------------|---------------|
| H | 0.3278168073  | -0.5723177458 | -3.0316524736 |
| C | 0.6212255257  | 0.1539291331  | -2.2779654439 |
| H | 0.251307482   | 1.1561039421  | -2.4629413225 |
| C | 1.7867714714  | -0.0574299914 | -1.5559346278 |
| C | 2.1611466215  | 0.7529909608  | -0.461073177  |
| C | 1.3544049176  | 1.8445435887  | -0.168113599  |
| H | 1.524812159   | 2.4533846802  | 0.7117301121  |
| H | 0.8534396364  | 2.3695382975  | -0.9713639991 |
| C | -0.7271940647 | 1.0114722119  | 0.2025517244  |
| H | -0.4025865143 | 0.7353527711  | 1.2041747125  |
| C | -1.4993628069 | 2.3103210312  | 0.1098824077  |
| C | -0.9295254698 | -0.0324900338 | -0.7066585024 |
| H | -1.6820987874 | 0.1223866176  | -1.4778305406 |
| C | -0.7062119878 | -1.4666316058 | -0.2764617521 |
| H | 2.2915802744  | -1.011498425  | -1.6873173711 |
| H | 0.2574989351  | -1.52982968   | 0.2429445508  |



|   |               |               |               |
|---|---------------|---------------|---------------|
| H | -0.6221879272 | -2.1103721639 | -1.1583148215 |
| C | -1.8064631703 | -2.004700718  | 0.6567965815  |
| H | -1.9180814483 | -1.3142550839 | 1.5023071663  |
| C | -1.5320167839 | -3.4185941393 | 1.192703023   |
| H | -2.7697981727 | -1.9974216828 | 0.1271420177  |
| H | -2.3003483283 | -3.6696804132 | 1.9351677461  |
| H | -0.5748261272 | -3.4169230861 | 1.7324740647  |
| C | -1.5066803925 | -4.5063435999 | 0.1126548233  |
| H | -0.6892504782 | -4.3536063355 | -0.5991082704 |
| H | -2.4437591526 | -4.5146043972 | -0.4565174919 |
| H | -1.376013443  | -5.4998369539 | 0.5539568717  |
| C | -2.8485820347 | 2.288906034   | 0.8635300862  |
| H | -1.6672793435 | 2.55942183    | -0.9462155784 |
| H | -0.9046567445 | 3.1341986774  | 0.5225466753  |
| H | -2.6525700301 | 2.033764576   | 1.9136983289  |
| C | -3.9136854929 | 1.3320965657  | 0.3077535891  |
| H | -3.2565871287 | 3.3095142666  | 0.8678291     |
| C | -4.386111151  | 1.6777481683  | -1.1084346442 |
| H | -4.777186559  | 1.3457420644  | 0.9850101932  |
| H | -3.527991014  | 0.3071578819  | 0.3254985818  |
| H | -4.7670826896 | 2.704659088   | -1.1578832078 |
| H | -5.1894144285 | 1.0077031986  | -1.431769112  |
| H | -3.5762643577 | 1.5934195156  | -1.8404346418 |
| C | 3.293813709   | 0.2789527651  | 0.47237647    |
| C | 3.5775683041  | 1.2866817736  | 1.6014558316  |
| H | 2.7173064932  | 1.4011393007  | 2.2691535403  |
| H | 4.4192640024  | 0.9379735427  | 2.2089091124  |
| H | 3.8358072479  | 2.2735335841  | 1.2043081797  |
| C | 2.9343508445  | -1.0769051001 | 1.1237969203  |
| H | 3.7498179962  | -1.4219614477 | 1.7700812202  |
| H | 2.0328906922  | -0.9849414291 | 1.7387061307  |
| H | 2.7520741902  | -1.8523176212 | 0.3744508519  |
| C | 4.5863455459  | 0.1162706798  | -0.3602702812 |
| H | 5.4126258511  | -0.2183560471 | 0.2774712008  |
| H | 4.4650083068  | -0.61919044   | -1.1607238735 |
| H | 4.8732428567  | 1.0668498228  | -0.8213651367 |
| H | 4.8732428567  | 1.0668498228  | -0.8213651367 |

TS exo 0120

E(RB3LYP) = -706.415593249 A.U.

First frequency = -500.6069 cm<sup>-1</sup>

|   |               |               |               |
|---|---------------|---------------|---------------|
| H | 1.3181018928  | -0.6448719987 | -3.4229640223 |
| C | 1.3262405313  | 0.0528885016  | -2.5897086003 |
| H | 0.8793472706  | 1.0149235819  | -2.8117914081 |
| C | 2.2826477337  | -0.0928294978 | -1.5968913056 |
| C | 2.2687345873  | 0.6763983268  | -0.4127741586 |
| C | 1.3029036007  | 1.6683878043  | -0.3023156084 |
| H | 1.1768339395  | 2.2205628277  | 0.6241081051  |
| H | 0.9713828518  | 2.2061574495  | -1.1811045807 |
| C | -0.6962676322 | 0.5943797137  | -0.5074648082 |
| H | -0.5843107727 | 0.3337371686  | 0.5397973712  |
| C | -1.5665418127 | 1.7970138578  | -0.8104691247 |
| C | -0.5472323462 | -0.4309075443 | -1.4433618713 |
| H | -1.0964416665 | -0.3283972056 | -2.3797068685 |
| C | -0.2464086933 | -1.8528540793 | -1.017784966  |
| H | 2.9082439523  | -0.9777329044 | -1.6396556532 |
| H | 0.413600777   | -1.8287403944 | -0.1430968545 |
| H | 0.3191542134  | -2.3664585106 | -1.803026123  |
| C | -1.5002822779 | -2.7031478931 | -0.7146351192 |
| H | -2.1194151758 | -2.7415357952 | -1.6213200061 |
| C | -2.3733747005 | -2.2365204158 | 0.4589196548  |
| H | -1.1737451569 | -3.7355377601 | -0.5253208144 |
| H | -3.2557054627 | -2.887090399  | 0.5135753245  |
| H | -2.7500493663 | -1.2301590004 | 0.2515751705  |
| C | -1.6632941944 | -2.2470471814 | 1.8164145834  |
| H | -2.3486356076 | -1.9647099785 | 2.62248249    |
| H | -0.8220063815 | -1.5474880779 | 1.8428139319  |
| H | -1.2679001893 | -3.2432323833 | 2.0473737686  |
| C | -3.0605291986 | 1.5681728736  | -0.5024550266 |
| H | -1.4556232874 | 2.0540009834  | -1.8727171256 |
| H | -1.2266463234 | 2.6741519736  | -0.2446934502 |
| H | -3.6464250537 | 2.3992795052  | -0.9189139832 |
| C | -3.3698427591 | 1.4503248067  | 0.9956090024  |
| H | -3.398151943  | 0.6617865879  | -1.0226770172 |
| C | -4.83831791   | 1.1189186146  | 1.2732854799  |

|   |               |               |               |
|---|---------------|---------------|---------------|
| H | -3.0995859826 | 2.3933056055  | 1.4902144799  |
| H | -2.7347088977 | 0.6790808905  | 1.4476383929  |
| H | -5.1093229405 | 0.1528418379  | 0.83200517    |
| H | -5.5039385383 | 1.8763830389  | 0.8435985566  |
| H | -5.0433274124 | 1.0640880565  | 2.3473898925  |
| C | 3.1183080105  | 0.2999972251  | 0.8192937989  |
| C | 3.9592041611  | 1.5243274013  | 1.2489695449  |
| H | 3.3245097102  | 2.3779366948  | 1.5039721675  |
| H | 4.5705322946  | 1.2852258796  | 2.1269093297  |
| H | 4.6291538856  | 1.8369186095  | 0.4412341827  |
| C | 2.1929481477  | -0.1157407738 | 1.9862231841  |
| H | 1.6031346837  | -0.999015648  | 1.7206042268  |
| H | 2.7844255244  | -0.3602198825 | 2.8759769647  |
| H | 1.4968796849  | 0.6822976641  | 2.260487579   |
| C | 4.0843291338  | -0.865720611  | 0.5388324894  |
| H | 4.6968146672  | -1.0600256731 | 1.4253605098  |
| H | 3.5490230888  | -1.7903093876 | 0.2999456663  |
| H | 4.7621028933  | -0.6376172658 | -0.2902664122 |
| H | 4.7621028933  | -0.6376172658 | -0.2902664122 |

TS exo 0122

E(RB3LYP) = -706.414002539 A.U.

First frequency = -521.6848  $\text{cm}^{-1}$

|   |               |               |               |
|---|---------------|---------------|---------------|
| H | 0.7854091636  | -1.4614686685 | -2.6556796309 |
| C | 0.9792975144  | -0.531194507  | -2.1275249687 |
| H | 0.5613039346  | 0.3444773112  | -2.6113733703 |
| C | 2.1117874419  | -0.434653675  | -1.3296985131 |
| C | 2.3604482305  | 0.6776451174  | -0.4965746212 |
| C | 1.4603709021  | 1.7335685693  | -0.5574390898 |
| H | 1.5287595612  | 2.5754462616  | 0.1212538053  |
| H | 0.9782752152  | 1.9690304461  | -1.4974453079 |
| C | -0.58665494   | 0.86397318    | -0.0695870205 |
| H | -0.3168646587 | 0.9176113737  | 0.9836355471  |
| C | -1.4367254094 | 2.0117729164  | -0.5757636371 |
| C | -0.6406781311 | -0.4114267961 | -0.6464126183 |
| H | -1.3500128716 | -0.5514524481 | -1.4603089204 |
| C | -0.334147896  | -1.6335385271 | 0.1975830811  |

|   |               |               |               |
|---|---------------|---------------|---------------|
| H | 2.6870630903  | -1.342328622  | -1.1640439273 |
| H | 0.5178534421  | -1.3953036222 | 0.8429489915  |
| H | -0.0044830383 | -2.4633703421 | -0.4365263198 |
| C | -1.5104611515 | -2.1001549439 | 1.0795424701  |
| H | -1.1440040723 | -2.8643070893 | 1.77955608    |
| C | -2.7072679742 | -2.680151114  | 0.3066531177  |
| H | -1.8473209063 | -1.2552455196 | 1.6938282729  |
| H | -3.0815867417 | -1.9379399368 | -0.4087848779 |
| H | -3.5279462105 | -2.8576720711 | 1.0133783366  |
| C | -2.3948708443 | -3.9846465591 | -0.4355056836 |
| H | -2.0113148115 | -4.746863241  | 0.2528056392  |
| H | -1.6420118708 | -3.8376432313 | -1.2167596309 |
| H | -3.2908201426 | -4.3899457239 | -0.9169707264 |
| C | -2.7763147762 | 2.1818013515  | 0.1707471331  |
| H | -1.6363705364 | 1.8691373879  | -1.6474381768 |
| H | -0.889430759  | 2.95853253    | -0.4904402158 |
| H | -2.572170345  | 2.3174005794  | 1.2425285846  |
| C | -3.7661781717 | 1.0282502469  | -0.0105563019 |
| H | -3.246558362  | 3.1153192201  | -0.1686449534 |
| C | -5.1001639097 | 1.2708815306  | 0.7006116961  |
| H | -3.3148551801 | 0.1050268814  | 0.3638307793  |
| H | -3.9419470947 | 0.8683834238  | -1.0837355198 |
| H | -5.5949320089 | 2.1725519042  | 0.3214951122  |
| H | -4.951661475  | 1.4059094633  | 1.7782680019  |
| H | -5.7872145662 | 0.4295824402  | 0.5625238265  |
| C | 3.4662338805  | 0.5833711436  | 0.5745609025  |
| C | 3.6155721898  | 1.8916533068  | 1.3727377583  |
| H | 4.442883409   | 1.8013591744  | 2.0844125318  |
| H | 3.8280816201  | 2.7412394348  | 0.7159568133  |
| H | 2.7128127647  | 2.1217738191  | 1.9480707953  |
| C | 3.1615808844  | -0.5543538509 | 1.5763613385  |
| H | 3.9636958014  | -0.6389693257 | 2.3188063263  |
| H | 2.2266751521  | -0.3591960622 | 2.1120613575  |
| H | 3.066321687   | -1.5219375117 | 1.0757277363  |
| C | 4.8129685225  | 0.2952931594  | -0.1281210826 |
| H | 5.6216147176  | 0.227389769   | 0.6086821781  |
| H | 4.7893372643  | -0.6466216059 | -0.6835918108 |
| H | 5.0605049702  | 1.0934776693  | -0.8353220733 |

H 5.0605049702 1.0934776693 -0.8353220733

TS exo 0127

E(RB3LYP) = -706.413847094 A.U.

First frequency = -481.8023 cm<sup>-1</sup>

|   |               |               |               |
|---|---------------|---------------|---------------|
| H | 0.5743626507  | -0.4187043134 | -3.186673671  |
| C | 0.7272808716  | 0.246501332   | -2.3411187816 |
| H | 0.1992934373  | 1.1898445386  | -2.4135987625 |
| C | 1.865041984   | 0.1053521422  | -1.5661194887 |
| C | 2.0644118315  | 0.8249980284  | -0.3651887763 |
| C | 1.111136069   | 1.7701585294  | -0.0124299442 |
| H | 1.1636627436  | 2.2816990817  | 0.9437878257  |
| H | 0.5795475324  | 2.3222678443  | -0.7766355434 |
| C | -0.8505862694 | 0.6142357284  | 0.1630481455  |
| H | -0.5179925541 | 0.30359542    | 1.1510099337  |
| C | -1.8128156504 | 1.7799413894  | 0.1311028644  |
| C | -0.8688241627 | -0.3551058506 | -0.8366358499 |
| H | -1.5984296094 | -0.2350333918 | -1.6364133876 |
| C | -0.4279236685 | -1.7688950627 | -0.5355565049 |
| H | 2.501855584   | -0.7471390907 | -1.7758217879 |
| H | 0.5296400851  | -1.7317046318 | 0.0014102185  |
| H | -0.234945328  | -2.3076649158 | -1.4690813063 |
| C | -1.4482140327 | -2.5452276431 | 0.3180834876  |
| H | -1.6625552279 | -1.961568205  | 1.2220843002  |
| C | -0.9837932254 | -3.9530084137 | 0.7222749317  |
| H | -2.3989374111 | -2.6164615151 | -0.2292649733 |
| H | -1.7141385665 | -4.3777415083 | 1.4228995412  |
| H | -0.0392742032 | -3.8724226567 | 1.2783843825  |
| C | -0.8017232663 | -4.917893938  | -0.4550871822 |
| H | -0.5358252636 | -5.9215993274 | -0.107548276  |
| H | -0.0103180114 | -4.5857735619 | -1.1344418105 |
| H | -1.7257473082 | -5.0009809367 | -1.039367094  |
| C | -3.2058812206 | 1.3971681872  | 0.6669136772  |
| H | -1.9014369301 | 2.1436308606  | -0.9010897204 |
| H | -1.4257674751 | 2.6199385202  | 0.7226690135  |
| H | -3.6192819742 | 0.5963201158  | 0.0391137128  |
| C | -4.1993282212 | 2.5669567785  | 0.7351808655  |

|   |               |               |               |
|---|---------------|---------------|---------------|
| H | -3.0870907716 | 0.9656343939  | 1.6697112466  |
| C | -4.5656584371 | 3.1556485919  | -0.632129774  |
| H | -3.7830146525 | 3.3574688743  | 1.3748094575  |
| H | -5.1145384803 | 2.2229101965  | 1.2336992454  |
| H | -3.6977506531 | 3.6004642923  | -1.1294057348 |
| H | -5.325022758  | 3.938501739   | -0.5361246564 |
| H | -4.9666267126 | 2.3812844086  | -1.2966902381 |
| C | 3.1624808861  | 0.4372914767  | 0.6479933818  |
| C | 4.0752965291  | -0.6898529626 | 0.1310464149  |
| H | 3.5225848848  | -1.6216388993 | -0.026933554  |
| H | 4.5625024943  | -0.4159647939 | -0.810427521  |
| H | 4.8618773918  | -0.8942571359 | 0.8647508432  |
| C | 4.0456477945  | 1.6735548885  | 0.9351125428  |
| H | 4.8323548539  | 1.4282791748  | 1.6580747847  |
| H | 4.5245529138  | 2.0293536529  | 0.0169354372  |
| H | 3.4575716926  | 2.4996802469  | 1.3453067982  |
| C | 2.513533216   | -0.0412393282 | 1.9673462022  |
| H | 1.8916880418  | -0.926513398  | 1.7984164334  |
| H | 3.2853099402  | -0.3039046165 | 2.6999574602  |
| H | 1.8816726603  | 0.7308952685  | 2.4156715895  |
| H | 1.8816726603  | 0.7308952685  | 2.4156715895  |

TS exo 0137

E(RB3LYP) = -706.415245624 A.U.

First frequency = -504.5659  $\text{cm}^{-1}$

|   |               |               |               |
|---|---------------|---------------|---------------|
| H | 1.281901128   | -1.5145357553 | -2.7401397278 |
| C | 1.2444148089  | -0.5696239524 | -2.2043840983 |
| H | 0.7242382301  | 0.2201454488  | -2.7346463739 |
| C | 2.2310532068  | -0.2806352143 | -1.2749191286 |
| C | 2.1763870358  | 0.8514284608  | -0.4296691164 |
| C | 1.1256134223  | 1.7394277211  | -0.6125690445 |
| H | 0.9692745746  | 2.575895161   | 0.0579332851  |
| H | 0.7217184237  | 1.8937107901  | -1.6047772038 |
| C | -0.7727942294 | 0.514197202   | -0.3379954038 |
| H | -0.6244858203 | 0.5957633065  | 0.7357445179  |
| C | -1.7414350838 | 1.5019097822  | -0.9532498773 |
| C | -0.5661916074 | -0.7404123076 | -0.915610816  |

|   |               |               |               |
|---|---------------|---------------|---------------|
| H | -1.1420509955 | -0.9660969649 | -1.8121938101 |
| C | -0.1735998641 | -1.9243650178 | -0.0570946001 |
| H | 2.9360436666  | -1.0715917503 | -1.030782763  |
| H | 0.6851068471  | -1.6386585151 | 0.560014013   |
| H | 0.1704631644  | -2.7481558779 | -0.6922655642 |
| C | -1.2986506599 | -2.4218215756 | 0.8746274254  |
| H | -0.9217011288 | -3.2794115855 | 1.4497541774  |
| C | -2.5995866288 | -2.8257844401 | 0.1643660839  |
| H | -1.5236262309 | -1.6345435923 | 1.6055993343  |
| H | -3.0309212592 | -1.9448422993 | -0.3264654285 |
| H | -3.3298644053 | -3.1394835633 | 0.9210519896  |
| C | -2.4245268292 | -3.9468501566 | -0.8655569319 |
| H | -1.7818944854 | -3.634818372  | -1.6956107392 |
| H | -3.3871131433 | -4.2487525155 | -1.2910346798 |
| H | -1.9672312343 | -4.8333831664 | -0.410599063  |
| C | -3.2250608969 | 1.1647890254  | -0.6893730162 |
| H | -1.5847158323 | 1.5309564918  | -2.0404325948 |
| H | -1.5305333436 | 2.514287074   | -0.5902670154 |
| H | -3.847373816  | 1.9454855916  | -1.1490812409 |
| C | -3.6021211588 | 1.0282490705  | 0.7936616236  |
| H | -3.4695928106 | 0.2278405498  | -1.2055460805 |
| C | -3.3140011611 | 2.2809236627  | 1.6279367009  |
| H | -3.0681078906 | 0.1727564321  | 1.2244104275  |
| H | -4.6698311199 | 0.7845572804  | 0.8612900641  |
| H | -2.2412194622 | 2.4966982466  | 1.6742851401  |
| H | -3.6693117666 | 2.1622597245  | 2.6566388858  |
| H | -3.8090819567 | 3.1618931416  | 1.2027222327  |
| C | 3.1370138351  | 0.9357719463  | 0.7739446399  |
| C | 4.5916597825  | 0.9055419878  | 0.2511473462  |
| H | 4.8062559469  | -0.0128862354 | -0.3027370946 |
| H | 4.7812733827  | 1.7508385813  | -0.4182212391 |
| H | 5.2993439547  | 0.964337251   | 1.0860865089  |
| C | 2.9471189806  | 2.2334489017  | 1.580839259   |
| H | 3.6795015587  | 2.2766215254  | 2.3936997155  |
| H | 3.0871932714  | 3.1206192836  | 0.9550547208  |
| H | 1.9517652835  | 2.2881490903  | 2.034006864   |
| C | 2.9153962052  | -0.2573759288 | 1.7326499371  |
| H | 1.8949057167  | -0.251460193  | 2.1297998431  |

|   |              |               |              |
|---|--------------|---------------|--------------|
| H | 3.0754613947 | -1.2162242289 | 1.2316656303 |
| H | 3.6081564579 | -0.2041648307 | 2.5805667999 |
| H | 3.6081564579 | -0.2041648307 | 2.5805667999 |

TS exo 0140

E(RB3LYP) = -706.414918870 A.U.

First frequency = -492.4464 cm<sup>-1</sup>

|   |               |               |               |
|---|---------------|---------------|---------------|
| H | 0.1965007913  | -1.2635731534 | -2.7381979069 |
| C | 0.4818243201  | -0.418203566  | -2.1192621365 |
| H | 0.0522924004  | 0.5255460589  | -2.4321814487 |
| C | 1.6465377756  | -0.4831288803 | -1.3755246627 |
| C | 2.0177969668  | 0.5201649214  | -0.4514971476 |
| C | 1.2211399568  | 1.6583686834  | -0.3850950375 |
| H | 1.4112466679  | 2.4227815071  | 0.3623546529  |
| H | 0.7450072079  | 2.0352719771  | -1.2813128036 |
| C | -0.8491380106 | 0.9587512951  | 0.1616811782  |
| H | -0.5325249673 | 1.0016852113  | 1.20157364    |
| C | -1.6554412204 | 2.141846886   | -0.3260717851 |
| C | -1.0415425461 | -0.3074595686 | -0.3865322701 |
| H | -1.802233278  | -0.4241900199 | -1.1565158319 |
| C | -0.6832502052 | -1.531759969  | 0.4216082467  |
| H | 2.162310929   | -1.4371269712 | -1.3495955649 |
| H | -1.2646100369 | -1.523133796  | 1.3566586639  |
| H | 0.3686416031  | -1.4453412996 | 0.7300775134  |
| C | -0.9007457929 | -2.8725973571 | -0.2819209746 |
| H | -1.9490984284 | -2.9508105819 | -0.6041485557 |
| C | -0.5479483998 | -4.075719583  | 0.5990460652  |
| H | -0.2969809849 | -2.9071681847 | -1.1965673806 |
| H | -1.1508465158 | -4.0449240222 | 1.5168726133  |
| H | 0.4990501856  | -3.9884800209 | 0.9212690635  |
| C | -0.7568401398 | -5.4173318665 | -0.1086147896 |
| H | -0.4955304013 | -6.2605532889 | 0.5390402905  |
| H | -0.1395951222 | -5.4860114768 | -1.0117783503 |
| H | -1.8019435381 | -5.5424503491 | -0.4143971447 |
| C | -3.0747640886 | 2.1801151751  | 0.2674800334  |
| H | -1.7284240843 | 2.1069456185  | -1.4228318512 |
| H | -1.1439436548 | 3.0819299858  | -0.0825049574 |



|   |               |               |               |
|---|---------------|---------------|---------------|
| H | -3.5981655368 | 1.2512943465  | 0.0041212111  |
| C | -3.8951459332 | 3.3863448203  | -0.2026715656 |
| H | -3.006984533  | 2.1888193742  | 1.3644587357  |
| C | -5.3070964151 | 3.4156523701  | 0.3895147798  |
| H | -3.9554865189 | 3.3761469514  | -1.2996614932 |
| H | -3.3644088013 | 4.3107821416  | 0.0631332098  |
| H | -5.8735287052 | 4.2846152019  | 0.038965702   |
| H | -5.2739493583 | 3.4579662804  | 1.4842175329  |
| H | -5.8689843614 | 2.5164850506  | 0.1120182294  |
| C | 3.1360920853  | 0.3065271864  | 0.5899647562  |
| C | 4.2237955166  | 1.3862748152  | 0.3824651338  |
| H | 5.0340747323  | 1.2671492022  | 1.1113129094  |
| H | 4.6544033593  | 1.3150238014  | -0.6217840829 |
| H | 3.811204002   | 2.3930691598  | 0.4971741401  |
| C | 2.5639050338  | 0.4340111629  | 2.020600811   |
| H | 1.8004699054  | -0.3279106811 | 2.2069440549  |
| H | 3.3607083318  | 0.3041759274  | 2.761792647   |
| H | 2.1094519305  | 1.4132936977  | 2.1955798852  |
| C | 3.8034321676  | -1.0757522818 | 0.4687586818  |
| H | 4.2503427136  | -1.2253238001 | -0.5193833324 |
| H | 4.6037635457  | -1.1666980147 | 1.2103855781  |
| H | 3.09099819    | -1.8876760377 | 0.6494435397  |
| H | 3.09099819    | -1.8876760377 | 0.6494435397  |

TS exo 0143

E(RB3LYP) = -706.414307695 A.U.

First frequency = -482.4956 cm<sup>-1</sup>

|   |               |               |               |
|---|---------------|---------------|---------------|
| H | 0.7441038207  | -0.7932064441 | -3.0300578441 |
| C | 0.8489358118  | -0.0343111739 | -2.2593604966 |
| H | 0.2100251215  | 0.8303485691  | -2.3940423135 |
| C | 2.02470405    | 0.0341878149  | -1.5324942729 |
| C | 2.1819252319  | 0.8857371538  | -0.414692758  |
| C | 1.1353647133  | 1.7433430019  | -0.1038759232 |
| H | 1.1632322617  | 2.3492621531  | 0.7965957358  |
| H | 0.5151504742  | 2.154287057   | -0.8898602158 |
| C | -0.6676916446 | 0.3990129539  | 0.2729750839  |
| H | -0.2699508504 | 0.227888772   | 1.2708311943  |

|   |               |               |               |
|---|---------------|---------------|---------------|
| C | -1.7552255525 | 1.4448502854  | 0.1707406271  |
| C | -0.6060394995 | -0.6617042997 | -0.6280429591 |
| H | -1.3696751578 | -0.7027776658 | -1.4027517074 |
| C | 0.0175850298  | -1.9761357033 | -0.2153099204 |
| H | 2.7512280265  | -0.754703733  | -1.6937433161 |
| H | 0.9925874484  | -1.7682121863 | 0.2426767653  |
| H | 0.2244533362  | -2.5893247059 | -1.0990898769 |
| C | -0.8359802267 | -2.7784800177 | 0.7891212349  |
| H | -0.2931988265 | -3.6963970754 | 1.0559636978  |
| C | -2.2400268408 | -3.1527100741 | 0.2892849909  |
| H | -0.9337379284 | -2.1936430349 | 1.7126879772  |
| H | -2.8142292809 | -2.2355210697 | 0.1083862824  |
| H | -2.7661234555 | -3.6874225804 | 1.0902955468  |
| C | -2.2430423312 | -4.0135606162 | -0.9785543223 |
| H | -1.8209251675 | -3.4752893886 | -1.833739137  |
| H | -3.2597808305 | -4.3154144949 | -1.2504816889 |
| H | -1.6501368321 | -4.9250705769 | -0.8381453284 |
| C | -3.0836646773 | 0.9732610071  | 0.7927676346  |
| H | -1.9124533224 | 1.6963279751  | -0.8864298897 |
| H | -1.445700037  | 2.3742949447  | 0.6664511564  |
| H | -3.4385847989 | 0.0897654685  | 0.2455042736  |
| C | -4.1858930887 | 2.0431223099  | 0.8112863315  |
| H | -2.8890715117 | 0.6366064966  | 1.8196474482  |
| C | -4.6517384765 | 2.4828622113  | -0.5814952437 |
| H | -3.8300127473 | 2.9184406447  | 1.3720826519  |
| H | -5.0459952458 | 1.652790071   | 1.3701284181  |
| H | -4.9936405949 | 1.6227671207  | -1.1692513028 |
| H | -3.8485711274 | 2.969169314   | -1.1443734153 |
| H | -5.482332404  | 3.1931158757  | -0.5158370655 |
| C | 3.3582034196  | 0.7317438006  | 0.5727047927  |
| C | 4.3785795261  | -0.3284557727 | 0.1191716011  |
| H | 4.7921130865  | -0.0956015523 | -0.8675019329 |
| H | 5.2121955801  | -0.3660973002 | 0.8280197388  |
| H | 3.9359499521  | -1.3289919701 | 0.078273124   |
| C | 4.0969737541  | 2.084735061   | 0.6940210596  |
| H | 4.4923936601  | 2.3989609917  | -0.277526258  |
| H | 3.4306104292  | 2.8743653736  | 1.0532597673  |
| H | 4.9358478783  | 2.0065587539  | 1.3953719729  |

|   |              |               |              |
|---|--------------|---------------|--------------|
| C | 2.8248909345 | 0.3175451352  | 1.9636222988 |
| H | 2.3075191035 | -0.6460644731 | 1.9127624116 |
| H | 3.6514568222 | 0.2214623661  | 2.676979969  |
| H | 2.1234528435 | 1.0529737801  | 2.3680323518 |
| H | 2.1234528435 | 1.0529737801  | 2.3680323518 |

TS exo 0144

E(RB3LYP) = -706.414505056 A.U.

First frequency = -513.0339 cm<sup>-1</sup>

|   |               |               |               |
|---|---------------|---------------|---------------|
| H | 0.1966582971  | -1.3042199124 | -2.6067995158 |
| C | 0.5406668941  | -0.4249810508 | -2.0704711163 |
| H | 0.2388149498  | 0.5116627972  | -2.524110977  |
| C | 1.6801307609  | -0.5106088283 | -1.2866022435 |
| C | 2.1240043373  | 0.5515165253  | -0.4669178562 |
| C | 1.4197767405  | 1.7477651076  | -0.5356814055 |
| H | 1.6445178522  | 2.5739113214  | 0.1285090277  |
| H | 0.9847319971  | 2.0539444972  | -1.4784995678 |
| C | -0.7279925039 | 1.2743724057  | -0.0168748049 |
| H | -0.4497028671 | 1.3462764917  | 1.032920328   |
| C | -1.3967612522 | 2.5052118     | -0.5905898564 |
| C | -1.0188836495 | -0.0027385097 | -0.5041803368 |
| H | -1.7577364143 | -0.0802298071 | -1.2997034371 |
| C | -0.8957206758 | -1.1930623733 | 0.4215501032  |
| H | 2.1086609873  | -1.4980808658 | -1.1309854732 |
| H | -1.5924418213 | -1.0519443099 | 1.2629173338  |
| H | 0.1067754804  | -1.1861088161 | 0.866728267   |
| C | -1.168232362  | -2.5607855989 | -0.2080931685 |
| H | -2.1521076923 | -2.5491983481 | -0.69912571   |
| C | -1.1215695605 | -3.7055956732 | 0.8098249132  |
| H | -0.4343690623 | -2.7554552398 | -0.998869718  |
| H | -1.8607905981 | -3.5200715887 | 1.6009939152  |
| H | -0.1409027279 | -3.7045056756 | 1.3054625148  |
| C | -1.3768066288 | -5.0774330997 | 0.17949116    |
| H | -1.3371082872 | -5.8781652333 | 0.9251675691  |
| H | -0.6303416205 | -5.3015340978 | -0.5912405736 |
| H | -2.3629507763 | -5.1140282232 | -0.2976012264 |
| C | -2.7415054303 | 2.8484757299  | 0.0852526267  |

|   |               |               |               |
|---|---------------|---------------|---------------|
| H | -1.5623172138 | 2.3594778325  | -1.6677997326 |
| H | -0.7384717398 | 3.3775877982  | -0.4958798271 |
| H | -2.5718444851 | 2.9986201658  | 1.1609932314  |
| C | -3.8473635141 | 1.8055072752  | -0.1085606064 |
| H | -3.0900777321 | 3.8150265813  | -0.3046901848 |
| C | -5.1740923586 | 2.2259331399  | 0.5304969937  |
| H | -3.5233046065 | 0.8467247913  | 0.3123391848  |
| H | -3.9936620364 | 1.631023869   | -1.1837699993 |
| H | -5.9497076379 | 1.4671837418  | 0.383522962   |
| H | -5.5408390642 | 3.1657497104  | 0.1018450218  |
| H | -5.059096747  | 2.3799445422  | 1.6096886766  |
| C | 3.2287737302  | 0.2877636883  | 0.5767775255  |
| C | 3.5752591701  | 1.5492204883  | 1.3886122605  |
| H | 3.9007015118  | 2.3688834359  | 0.7401797734  |
| H | 2.721599292   | 1.8982979824  | 1.9790171595  |
| H | 4.3898300751  | 1.3304252702  | 2.0869288489  |
| C | 2.8029812867  | -0.8154645032 | 1.5730539245  |
| H | 1.9227485418  | -0.5038730483 | 2.1446500663  |
| H | 2.5595946744  | -1.7525401295 | 1.0642195621  |
| H | 3.6105046777  | -1.0229642119 | 2.2847887445  |
| C | 4.504809635   | -0.1688649603 | -0.1685020401 |
| H | 5.3168860628  | -0.3584785279 | 0.5429437771  |
| H | 4.3359711107  | -1.0892411827 | -0.7350642592 |
| H | 4.8389726924  | 0.5997644332  | -0.872762867  |
| H | 4.8389726924  | 0.5997644332  | -0.872762867  |

TS exo 0147

E(RB3LYP) = -706.414458883 A.U.

First frequency = -490.1520  $\text{cm}^{-1}$

|   |              |               |               |
|---|--------------|---------------|---------------|
| H | 0.3563597874 | -0.3273506139 | -3.1474611452 |
| C | 0.6398400322 | 0.333329159   | -2.3324410805 |
| H | 0.2495252658 | 1.3403310376  | -2.419094814  |
| C | 1.7861268776 | 0.0559647416  | -1.6056827617 |
| C | 2.1383671983 | 0.7710933978  | -0.4391028892 |
| C | 1.3394114614 | 1.8491731806  | -0.079988639  |
| H | 1.5047879972 | 2.3752868022  | 0.8553257159  |
| H | 0.8647414659 | 2.4521058069  | -0.8433149581 |

|   |               |               |               |
|---|---------------|---------------|---------------|
| C | -0.7522992321 | 1.0046137305  | 0.2121384603  |
| H | -0.4285680008 | 0.6880550113  | 1.2017338427  |
| C | -1.5357329324 | 2.2987691699  | 0.171792961   |
| C | -0.9360217544 | 0.0038909905  | -0.7427141521 |
| H | -1.6776428342 | 0.1784260361  | -1.5192580653 |
| C | -0.651673813  | -1.4393558132 | -0.392795893  |
| H | 2.2873475523  | -0.8829658957 | -1.8142535183 |
| H | 0.3330202313  | -1.4929617529 | 0.0908149617  |
| H | -0.575434291  | -2.0357673338 | -1.3078370986 |
| C | -1.6995281826 | -2.0598578248 | 0.5500258579  |
| H | -1.8074187157 | -1.412683332  | 1.4294086735  |
| C | -1.3564934602 | -3.4849550311 | 1.0110863941  |
| H | -2.6796209423 | -2.0640645    | 0.0521595169  |
| H | -2.0905971492 | -3.7983400021 | 1.7643834161  |
| H | -0.3830961458 | -3.4710697922 | 1.5211539385  |
| C | -1.325906673  | -4.5210390809 | -0.1184420279 |
| H | -2.2799293685 | -4.5393526786 | -0.658455088  |
| H | -1.1446139725 | -5.5277345112 | 0.2720982417  |
| H | -0.5381031728 | -4.3051384599 | -0.8470784774 |
| C | -2.8778747804 | 2.2324186487  | 0.9353672133  |
| H | -1.7145240731 | 2.5842145329  | -0.8731636528 |
| H | -0.9463450514 | 3.1130567162  | 0.6104439081  |
| H | -2.6677492891 | 1.9540817623  | 1.9768949319  |
| C | -3.9273407776 | 1.2677182494  | 0.3635345217  |
| H | -3.3060736562 | 3.2440909039  | 0.9694004641  |
| C | -4.4206056964 | 1.6413784114  | -1.0383360358 |
| H | -4.7843873519 | 1.2438110719  | 1.048641177   |
| H | -3.5185260866 | 0.2513113999  | 0.3496524423  |
| H | -3.6155629538 | 1.5969995705  | -1.7790343916 |
| H | -4.8260893435 | 2.6599127383  | -1.0554648182 |
| H | -5.2107954935 | 0.9617482632  | -1.3737417995 |
| C | 3.2193662314  | 0.264667721   | 0.5389771563  |
| C | 2.5788476367  | -0.0648963463 | 1.9072118655  |
| H | 3.3433194942  | -0.4067592226 | 2.6143121427  |
| H | 2.0866060024  | 0.8061565033  | 2.3491739289  |
| H | 1.8305969572  | -0.8580919082 | 1.8081854643  |
| C | 3.9324933998  | -1.0017886295 | 0.0308316652  |
| H | 4.7159875193  | -1.2937750885 | 0.7377142323  |

|   |              |               |               |
|---|--------------|---------------|---------------|
| H | 3.2428832177 | -1.8469134877 | -0.0641364862 |
| H | 4.4078685191 | -0.835830351  | -0.9413797566 |
| C | 4.283925023  | 1.3697390783  | 0.7302265433  |
| H | 5.0639488837 | 1.040506027   | 1.426599018   |
| H | 4.7605330298 | 1.6180927271  | -0.223790413  |
| H | 3.8411391525 | 2.2868162115  | 1.1297343841  |
| H | 3.8411391525 | 2.2868162115  | 1.1297343841  |

TS exo 0148

E(RB3LYP) = -706.415004751 A.U.

First frequency = -520.7219  $\text{cm}^{-1}$

|   |               |               |               |
|---|---------------|---------------|---------------|
| H | 0.4997222935  | 0.2761857282  | -3.2509835995 |
| C | 0.7133798288  | 0.7209536851  | -2.2823016084 |
| H | 0.2847246003  | 1.7080423513  | -2.1477128222 |
| C | 1.8692875878  | 0.3463988523  | -1.6102577755 |
| C | 2.147116574   | 0.7626714842  | -0.2904925635 |
| C | 1.2549177364  | 1.6481099873  | 0.3014075494  |
| H | 1.3499319502  | 1.9341370197  | 1.3421549643  |
| H | 0.7544271725  | 2.3881894899  | -0.3098163831 |
| C | -0.7775000376 | 0.6376564304  | 0.2391287867  |
| H | -0.4778206654 | 0.0779098536  | 1.1207866772  |
| C | -1.6262251938 | 1.8634409868  | 0.5038931144  |
| C | -0.8663811967 | -0.0669538759 | -0.9686504939 |
| H | -1.5972197359 | 0.2935802144  | -1.6912114832 |
| C | -0.5706431524 | -1.5515195671 | -1.0334496934 |
| H | 2.4459399069  | -0.4768742065 | -2.0247828945 |
| H | 0.3250540241  | -1.7610255005 | -0.4395585825 |
| H | -0.3178543964 | -1.8292214541 | -2.0629931775 |
| C | -1.7323754737 | -2.460681803  | -0.572659818  |
| H | -2.6259840406 | -2.2126966133 | -1.1615486785 |
| C | -2.0885918024 | -2.4136936679 | 0.9215054636  |
| H | -1.4757613399 | -3.4969810614 | -0.8346117326 |
| H | -2.9641825366 | -3.0548737916 | 1.0855740267  |
| H | -2.3993366537 | -1.4005764317 | 1.1977114172  |
| C | -0.9567364205 | -2.8687253985 | 1.8488663825  |
| H | -0.0969914239 | -2.1927443745 | 1.8025209022  |
| H | -0.6007367482 | -3.8694502433 | 1.5774648664  |

|   |               |               |               |
|---|---------------|---------------|---------------|
| H | -1.2891023923 | -2.9032192915 | 2.891541608   |
| C | -3.0473696315 | 1.5537375925  | 1.028086572   |
| H | -1.6957568987 | 2.4627546913  | -0.4137462556 |
| H | -1.1330931537 | 2.5044722096  | 1.2443083885  |
| H | -2.9567106583 | 0.9292071604  | 1.9269352373  |
| C | -3.9997485351 | 0.8707695891  | 0.0346134303  |
| H | -3.5041891259 | 2.4974221371  | 1.3580647044  |
| C | -4.3306860525 | 1.7200674375  | -1.1973858138 |
| H | -4.9311149444 | 0.6280231268  | 0.5618508135  |
| H | -3.5744795478 | -0.0860674887 | -0.2862503278 |
| H | -4.7470292897 | 2.6918061837  | -0.9069419596 |
| H | -5.065343851  | 1.2194382884  | -1.8364042203 |
| H | -3.4437712529 | 1.9136456492  | -1.8097234056 |
| C | 3.281749107   | 0.0709519421  | 0.4924797785  |
| C | 3.4400273228  | 0.6408711627  | 1.9139739979  |
| H | 2.5480596374  | 0.4630958756  | 2.523836219   |
| H | 4.2830631445  | 0.1563451118  | 2.417518089   |
| H | 3.6333401306  | 1.7181770229  | 1.8966994513  |
| C | 3.0177095514  | -1.447484965  | 0.6158722572  |
| H | 3.8424134693  | -1.9401187282 | 1.1438612616  |
| H | 2.0984164679  | -1.6366901248 | 1.1792826685  |
| H | 2.9154507138  | -1.9248857579 | -0.3625390906 |
| C | 4.6105126245  | 0.2957171254  | -0.2656199713 |
| H | 5.4408732968  | -0.1815871983 | 0.2674572775  |
| H | 4.5778436157  | -0.1234790916 | -1.2753999782 |
| H | 4.830334175   | 1.3644510452  | -0.3551127139 |
| H | 4.830334175   | 1.3644510452  | -0.3551127139 |

TS exo 0150

E(RB3LYP) = -706.414838293 A.U.

First frequency = -512.5057 cm<sup>-1</sup>

|   |              |               |               |
|---|--------------|---------------|---------------|
| H | 0.3036056194 | -1.018640489  | -2.8601925509 |
| C | 0.5357557255 | -0.2375730782 | -2.1425558299 |
| H | 0.1364098203 | 0.7347201792  | -2.4062610745 |
| C | 1.6592957539 | -0.3622412101 | -1.3424508407 |
| C | 1.9642341911 | 0.5496523614  | -0.306210171  |
| C | 1.1347083643 | 1.6557424134  | -0.1633853059 |

|   |               |               |               |
|---|---------------|---------------|---------------|
| H | 1.2549228906  | 2.3474779434  | 0.6619261932  |
| H | 0.690406893   | 2.102919033   | -1.0434966395 |
| C | -0.9561366098 | 0.8662919756  | 0.1533328093  |
| H | -0.7150594167 | 0.7601561853  | 1.2088787439  |
| C | -1.7396404884 | 2.1063157085  | -0.2157119551 |
| C | -1.1007719886 | -0.3108559541 | -0.5831206033 |
| H | -1.8103779157 | -0.3038338818 | -1.4097451892 |
| C | -0.8534881592 | -1.6421452225 | 0.0899945063  |
| H | 2.1930217129  | -1.3094470605 | -1.3713997281 |
| H | -1.5651634409 | -1.7515229009 | 0.9237705933  |
| H | 0.1393193459  | -1.6079151233 | 0.5517352795  |
| C | -0.9751937005 | -2.8726545498 | -0.8139942839 |
| H | -1.9499494874 | -2.8472199773 | -1.3202057553 |
| C | -0.8285264078 | -4.2075246765 | -0.0681838293 |
| H | -0.2171497693 | -2.8221883925 | -1.604598584  |
| H | -1.0429040349 | -5.0275908196 | -0.765225627  |
| H | -1.5911711798 | -4.2703842205 | 0.7202542253  |
| C | 0.5599005797  | -4.4238517542 | 0.5460475774  |
| H | 0.782045723   | -3.6838225194 | 1.3209380228  |
| H | 1.341794893   | -4.3436030657 | -0.2187970044 |
| H | 0.6422247191  | -5.4151213347 | 1.0036263752  |
| C | -3.1971570775 | 2.0579752757  | 0.2760198021  |
| H | -1.7367521957 | 2.2283149142  | -1.3088039978 |
| H | -1.2570471    | 3.0029675999  | 0.1940538458  |
| H | -3.6913830018 | 1.1766117663  | -0.1541410312 |
| C | -3.9956288147 | 3.3190483725  | -0.0722830618 |
| H | -3.2058427521 | 1.9086142585  | 1.3648981912  |
| C | -5.4456393847 | 3.2618766687  | 0.4169557695  |
| H | -3.9792644839 | 3.46727658    | -1.1608106096 |
| H | -3.4945687707 | 4.1956826104  | 0.3605661782  |
| H | -5.977281411  | 2.4120364966  | -0.0261747925 |
| H | -5.9954680338 | 4.1721587042  | 0.1563515567  |
| H | -5.4892687349 | 3.1454768517  | 1.505908795   |
| C | 3.0708858037  | 0.1951321781  | 0.7082784501  |
| C | 4.4055193023  | 0.0471731807  | -0.0593889292 |
| H | 4.3548690248  | -0.7464481536 | -0.8105344568 |
| H | 4.6621450589  | 0.9783568388  | -0.5746593185 |
| H | 5.2201456012  | -0.1980666835 | 0.6318696912  |



|   |              |               |              |
|---|--------------|---------------|--------------|
| C | 3.2528487115 | 1.2881317497  | 1.777174121  |
| H | 3.4967258691 | 2.2556754248  | 1.3270596148 |
| H | 2.3520870498 | 1.411974922   | 2.3874972103 |
| H | 4.0716206118 | 1.0163489721  | 2.4515442523 |
| C | 2.7576014333 | -1.1329232088 | 1.435810509  |
| H | 3.5695681073 | -1.3947386622 | 2.1241507887 |
| H | 1.8358908815 | -1.0471846817 | 2.0207803144 |
| H | 2.6348724675 | -1.9635716016 | 0.7356744626 |
| H | 2.6348724675 | -1.9635716016 | 0.7356744626 |

TS exo 0151

E(RB3LYP) = -706.414378465 A.U.

First frequency = -495.2024 cm<sup>-1</sup>

|   |               |               |               |
|---|---------------|---------------|---------------|
| H | 1.1026364789  | 0.0382233569  | -3.4141369321 |
| C | 1.0844993958  | 0.5316491755  | -2.4459678301 |
| H | 0.4890467271  | 1.4369250715  | -2.4194729498 |
| C | 2.1330642851  | 0.3262597192  | -1.5636931088 |
| C | 2.1149298959  | 0.8105782055  | -0.2368000663 |
| C | 1.0316209303  | 1.5883847834  | 0.1507169767  |
| H | 0.9135100534  | 1.8999942169  | 1.1841823062  |
| H | 0.5482540734  | 2.2431787978  | -0.5624989992 |
| C | -0.8187689619 | 0.2913880044  | -0.1965851781 |
| H | -0.5995166436 | -0.1712256907 | 0.7612420698  |
| C | -1.8607720948 | 1.388230341   | -0.178208598  |
| C | -0.6053338538 | -0.4697678213 | -1.3458176193 |
| H | -1.2348795025 | -0.2475682023 | -2.2077623222 |
| C | -0.0829234995 | -1.887745449  | -1.2688818703 |
| H | 2.8723162459  | -0.4179377303 | -1.8392698474 |
| H | 0.6786350768  | -1.9433223118 | -0.4824904959 |
| H | 0.4313885046  | -2.1454270525 | -2.2014262058 |
| C | -1.1781972763 | -2.9503700283 | -1.0248691207 |
| H | -1.9228015671 | -2.870799587  | -1.8286449711 |
| C | -1.9009342152 | -2.8866046894 | 0.3291327012  |
| H | -0.7196862547 | -3.943674916  | -1.1322261103 |
| H | -2.6973386157 | -3.6419311014 | 0.329545571   |
| H | -2.4005338862 | -1.9172513379 | 0.4322663503  |
| C | -0.9891707902 | -3.1247249929 | 1.537487267   |

|   |               |               |               |
|---|---------------|---------------|---------------|
| H | -1.5647826142 | -3.1492812202 | 2.4686605783  |
| H | -0.2350357275 | -2.3385351528 | 1.6410842548  |
| H | -0.4572416222 | -4.0793706291 | 1.4484715933  |
| C | -3.2914345876 | 0.8503065925  | 0.0161003124  |
| H | -1.820513084  | 1.9448385971  | -1.126359751  |
| H | -1.6331022353 | 2.111288721   | 0.6128035132  |
| H | -3.4924796436 | 0.1080578226  | -0.7664361777 |
| C | -4.3819479483 | 1.9324574775  | -0.0155521849 |
| H | -3.3442839633 | 0.3093388784  | 0.9715485089  |
| C | -4.3056093082 | 2.93571803    | 1.1411792766  |
| H | -5.363479543  | 1.4417916452  | 0.0013327939  |
| H | -4.327045206  | 2.4705825171  | -0.9720338874 |
| H | -4.3414146671 | 2.4208494276  | 2.1084540158  |
| H | -5.1416349007 | 3.6419049369  | 1.1083845888  |
| H | -3.3812134068 | 3.5212930453  | 1.1126743808  |
| C | 3.1241600254  | 0.3249663422  | 0.8252501053  |
| C | 2.3892804723  | -0.4908672107 | 1.9131384753  |
| H | 1.5979021914  | 0.0904411799  | 2.3952541618  |
| H | 1.9329832583  | -1.3882671816 | 1.4834945273  |
| H | 3.0901553448  | -0.8095081783 | 2.69326786    |
| C | 4.2299269762  | -0.5647732123 | 0.2279277835  |
| H | 4.7813756367  | -0.0465745872 | -0.5633927821 |
| H | 4.946731725   | -0.8382572557 | 1.0091144794  |
| H | 3.8263045594  | -1.4938940557 | -0.1870876506 |
| C | 3.8014034836  | 1.551482508   | 1.4795707662  |
| H | 3.069717466   | 2.2038686539  | 1.9647631233  |
| H | 4.5249775714  | 1.2341929329  | 2.2394380656  |
| H | 4.3326525727  | 2.1466859317  | 0.7295869967  |
| H | 4.3326525727  | 2.1466859317  | 0.7295869967  |

TS exo 0152

E(RB3LYP) = -706.414874767 A.U.

First frequency = -494.0147 cm<sup>-1</sup>

|   |              |               |               |
|---|--------------|---------------|---------------|
| H | 0.1999856137 | -1.2002902075 | -2.7400552033 |
| C | 0.5468777752 | -0.3536032724 | -2.1552640067 |
| H | 0.2309121923 | 0.6086421459  | -2.5388121607 |
| C | 1.6719074218 | -0.4923776298 | -1.3609623718 |

|   |               |               |               |
|---|---------------|---------------|---------------|
| C | 2.1079921951  | 0.51910604    | -0.4757744426 |
| C | 1.4254611222  | 1.7310060356  | -0.5020669668 |
| H | 1.6619044263  | 2.5140868736  | 0.21213947    |
| H | 1.023511189   | 2.1013623361  | -1.4365324572 |
| C | -0.7208373302 | 1.272776104   | -0.0045019102 |
| H | -0.4363572057 | 1.3322773622  | 1.0443775091  |
| C | -1.3908758362 | 2.5109890979  | -0.5607559388 |
| C | -1.0133048026 | 0.0033037261  | -0.5029922333 |
| H | -1.7536416317 | -0.0792057598 | -1.2955666571 |
| C | -0.8112992114 | -1.2047868716 | 0.3811741446  |
| H | 2.0857376063  | -1.4903125425 | -1.2621315767 |
| H | -1.4209157331 | -1.0856643953 | 1.2903917302  |
| H | 0.2322308212  | -1.2087428271 | 0.7275211343  |
| C | -1.1432610222 | -2.553019103  | -0.26069233   |
| H | -2.1818094791 | -2.5398850304 | -0.6215802491 |
| C | -0.9512454192 | -3.7351372077 | 0.6951355203  |
| H | -0.5142292464 | -2.7008545912 | -1.1465708568 |
| H | -1.5805025967 | -3.5912259365 | 1.5840547006  |
| H | 0.0867064354  | -3.7385427054 | 1.056055838   |
| C | -1.2744169165 | -5.0853464467 | 0.0494854735  |
| H | -1.127140382  | -5.9136362666 | 0.7501903567  |
| H | -0.6353726209 | -5.2675709419 | -0.8221940792 |
| H | -2.3150530945 | -5.1187369866 | -0.2930875404 |
| C | -2.7295075417 | 2.8503133547  | 0.1288001721  |
| H | -1.5639110286 | 2.3774082862  | -1.6382460187 |
| H | -0.7287304129 | 3.379775424   | -0.4607488702 |
| H | -2.5523376568 | 2.9834105142  | 1.2055954688  |
| C | -3.8407438987 | 1.8148666892  | -0.07407484   |
| H | -3.0763304634 | 3.8240384655  | -0.2443305102 |
| C | -5.1598902943 | 2.2270237399  | 0.5856719748  |
| H | -3.5153620527 | 0.8472635699  | 0.3250293396  |
| H | -3.9978234388 | 1.6616512697  | -1.1510165011 |
| H | -5.5273857401 | 3.1763596651  | 0.1791948981  |
| H | -5.0342330935 | 2.359196957   | 1.6665672149  |
| H | -5.9394857235 | 1.4739057345  | 0.4310290688  |
| C | 3.1599117039  | 0.2559547726  | 0.6218337931  |
| C | 4.3551803879  | 1.2135842362  | 0.4070114069  |
| H | 4.8143145046  | 1.0469710912  | -0.5730106893 |

|   |              |               |               |
|---|--------------|---------------|---------------|
| H | 4.0392292997 | 2.2600498871  | 0.4531486714  |
| H | 5.1217955391 | 1.0570640702  | 1.1749667674  |
| C | 2.5494334198 | 0.5148985844  | 2.0185212983  |
| H | 3.301276812  | 0.3498689236  | 2.7986664451  |
| H | 2.1864414254 | 1.5411523172  | 2.1244895945  |
| H | 1.7088840321 | -0.1595393429 | 2.2101993475  |
| C | 3.6925145773 | -1.1884761179 | 0.5986177687  |
| H | 2.8980023344 | -1.9172473679 | 0.7911978236  |
| H | 4.1576437686 | -1.4339828373 | -0.3615431195 |
| H | 4.4529670424 | -1.3151065175 | 1.3761022911  |
| H | 4.4529670424 | -1.3151065175 | 1.3761022911  |

TS exo 0155

E(RB3LYP) = -706.414387883 A.U.

First frequency = -484.5623  $\text{cm}^{-1}$

|   |               |               |               |
|---|---------------|---------------|---------------|
| H | 1.123958024   | -1.0157638463 | -3.1732813957 |
| C | 1.1440016449  | -0.1858538692 | -2.4720500479 |
| H | 0.718553252   | 0.7336744073  | -2.8561147398 |
| C | 2.0766799541  | -0.1869300759 | -1.4491939173 |
| C | 2.0699444024  | 0.7718585137  | -0.4100617914 |
| C | 1.1413099211  | 1.8008872809  | -0.4875449548 |
| H | 1.0272538976  | 2.5083851067  | 0.3281533588  |
| H | 0.8360568089  | 2.1892283238  | -1.4505440292 |
| C | -0.8926436511 | 0.7754476518  | -0.5216683845 |
| H | -0.7960277201 | 0.6843372672  | 0.556918252   |
| C | -1.7218886861 | 1.9380471897  | -1.0216921869 |
| C | -0.7761206172 | -0.3932462603 | -1.27088525   |
| H | -1.3097366765 | -0.4344166156 | -2.2195298833 |
| C | -0.5116175162 | -1.7168639037 | -0.5906578526 |
| H | 2.675377943   | -1.0831468946 | -1.3284683783 |
| H | 0.3245517474  | -1.590857646  | 0.1102433833  |
| H | -0.1830907695 | -2.4553409657 | -1.3294363166 |
| C | -1.7296581948 | -2.2552857013 | 0.1828096613  |
| H | -2.0543635363 | -1.4901933877 | 0.8988537941  |
| C | -1.4616448476 | -3.5674222193 | 0.9363257709  |
| H | -2.5692483343 | -2.3966338523 | -0.5124537466 |
| H | -2.3359575247 | -3.8024393699 | 1.5567828854  |

|   |               |               |               |
|---|---------------|---------------|---------------|
| H | -0.6254610126 | -3.415705278  | 1.6331949706  |
| C | -1.1582797351 | -4.7645233078 | 0.0278921544  |
| H | -1.9704891045 | -4.9259556347 | -0.690643505  |
| H | -1.0410294024 | -5.6841550225 | 0.6104800689  |
| H | -0.2360915378 | -4.6186371761 | -0.5434274172 |
| C | -3.2384399668 | 1.7471126066  | -0.8040742417 |
| H | -1.5403097324 | 2.0732112787  | -2.0967617957 |
| H | -1.4025907383 | 2.869904624   | -0.5411981717 |
| H | -3.7622091887 | 2.6270720553  | -1.2033326436 |
| C | -3.6586759608 | 1.5341698916  | 0.6589483479  |
| H | -3.5718390042 | 0.8861470999  | -1.3971905186 |
| C | -3.2440652171 | 2.6698788742  | 1.6006240095  |
| H | -3.2388038795 | 0.5884413817  | 1.0227499549  |
| H | -4.7488380132 | 1.4143349099  | 0.6937152515  |
| H | -2.1547603121 | 2.7485515786  | 1.6831688285  |
| H | -3.6383251137 | 2.5114989023  | 2.6096023099  |
| H | -3.6181617005 | 3.6365790318  | 1.2433727356  |
| C | 2.8855555265  | 0.5803638682  | 0.8863182954  |
| C | 1.9269213398  | 0.4240693138  | 2.0896671869  |
| H | 2.4958357408  | 0.3038465502  | 3.0187352279  |
| H | 1.2771280899  | 1.295640005   | 2.2108995576  |
| H | 1.2870265325  | -0.4561026901 | 1.9681390399  |
| C | 3.7941229224  | -0.6618073161 | 0.8376299162  |
| H | 4.3822687066  | -0.7259358244 | 1.7589209347  |
| H | 3.215219528   | -1.5871286298 | 0.7517538866  |
| H | 4.4957170695  | -0.6167896915 | -0.0017079009 |
| C | 3.7822545917  | 1.8201786476  | 1.1087546119  |
| H | 3.1880802243  | 2.7347908263  | 1.1925085234  |
| H | 4.3689580242  | 1.7140527673  | 2.0286629059  |
| H | 4.477931251   | 1.9502338795  | 0.273231399   |
| H | 4.477931251   | 1.9502338795  | 0.273231399   |

TS exo 0158

E(RB3LYP) = -706.414407747 A.U.

First frequency = -511.6328  $\text{cm}^{-1}$

|   |              |               |               |
|---|--------------|---------------|---------------|
| H | 0.5411822329 | -1.2784869954 | -2.7466484131 |
| C | 0.737790738  | -0.3930295534 | -2.1497680543 |

|   |               |               |               |
|---|---------------|---------------|---------------|
| H | 0.3919335191  | 0.5282198202  | -2.6042138281 |
| C | 1.7916809933  | -0.4003660874 | -1.2507576832 |
| C | 2.0414096199  | 0.6669637532  | -0.3580771628 |
| C | 1.2401346293  | 1.7963494757  | -0.4705219441 |
| H | 1.3133958753  | 2.6131999808  | 0.237520478   |
| H | 0.8778235261  | 2.0966530693  | -1.445229619  |
| C | -0.9019343164 | 1.0933556937  | -0.2098961769 |
| H | -0.7384340318 | 1.1605122921  | 0.8622524546  |
| C | -1.6089309595 | 2.2674304455  | -0.8535187974 |
| C | -1.0158997154 | -0.1873783846 | -0.7529906738 |
| H | -1.6556775235 | -0.3081316182 | -1.6265703004 |
| C | -0.8750734218 | -1.3918034188 | 0.1515430538  |
| H | 2.2979136559  | -1.3475632666 | -1.0792762897 |
| H | -1.6781631231 | -1.3554086979 | 0.9043576435  |
| H | 0.0609316061  | -1.2953344761 | 0.7154096919  |
| C | -0.9188541136 | -2.7571799789 | -0.5381070425 |
| H | -1.8320834608 | -2.8328462995 | -1.1460182743 |
| C | -0.8686290308 | -3.9266094011 | 0.4513245925  |
| H | -0.0787092559 | -2.8441863135 | -1.2368786002 |
| H | -1.7135267338 | -3.8501683899 | 1.1492418807  |
| H | 0.0392012766  | -3.8385733537 | 1.0640804885  |
| C | -0.8926749439 | -5.2940268501 | -0.2371718527 |
| H | -0.8545590469 | -6.1125663725 | 0.488992498   |
| H | -0.0386690476 | -5.4086286772 | -0.914667101  |
| H | -1.8040336437 | -5.418624981  | -0.8332787846 |
| C | -3.1280217263 | 2.29318326    | -0.5886532087 |
| H | -1.4438906265 | 2.2344166808  | -1.9396765255 |
| H | -1.1716534601 | 3.2115053191  | -0.5040186773 |
| H | -3.5730374376 | 3.1279276436  | -1.1483526634 |
| C | -3.499617457  | 2.4286876303  | 0.8925005626  |
| H | -3.5766827592 | 1.3748337929  | -0.9908834828 |
| C | -5.0120254017 | 2.5020302598  | 1.1200520118  |
| H | -3.0192038468 | 3.3272542124  | 1.3043367805  |
| H | -3.0866904837 | 1.578801302   | 1.4500796265  |
| H | -5.2558764057 | 2.5959317954  | 2.1833529287  |
| H | -5.5099908842 | 1.6017907966  | 0.741859463   |
| H | -5.4487364884 | 3.3623649254  | 0.5998758762  |
| C | 3.0494378824  | 0.4663197009  | 0.7921538425  |

|   |              |               |               |
|---|--------------|---------------|---------------|
| C | 2.6295269663 | -0.7108738358 | 1.7026288824  |
| H | 3.3740366281 | -0.871012583  | 2.4911352072  |
| H | 1.6682335612 | -0.5055161776 | 2.1846760414  |
| H | 2.5323067062 | -1.6452911206 | 1.1425714458  |
| C | 4.4357767688 | 0.1611587559  | 0.1779647809  |
| H | 4.4184822213 | -0.7473518071 | -0.4310419314 |
| H | 4.7666367817 | 0.9854152388  | -0.4620226356 |
| H | 5.1821445714 | 0.0197268213  | 0.9682101883  |
| C | 3.1835077629 | 1.7210535576  | 1.6742924044  |
| H | 3.9360172165 | 1.5510111916  | 2.4513673005  |
| H | 3.4958043289 | 2.5926619377  | 1.0903689989  |
| H | 2.2418798629 | 1.9655179817  | 2.1770350317  |
| H | 2.2418798629 | 1.9655179817  | 2.1770350317  |

TS exo 0166

E(RB3LYP) = -706.414751802 A.U.

First frequency = -492.1542 cm<sup>-1</sup>

|   |               |               |               |
|---|---------------|---------------|---------------|
| H | 0.4423527018  | -1.4196184369 | -2.7809979252 |
| C | 0.6861276914  | -0.5271818837 | -2.2124157509 |
| H | 0.3458855857  | 0.394944933   | -2.667750992  |
| C | 1.7441529094  | -0.5575362006 | -1.3212056989 |
| C | 2.0427176655  | 0.5200714822  | -0.4565076263 |
| C | 1.3011339531  | 1.6871864412  | -0.6044562791 |
| H | 1.4302415273  | 2.5152237562  | 0.0860000635  |
| H | 0.9600723593  | 1.9885634469  | -1.5865933145 |
| C | -0.8566382519 | 1.1103863147  | -0.2705016628 |
| H | -0.661218771  | 1.2438440288  | 0.7900311304  |
| C | -1.5329280352 | 2.2664762877  | -0.9769570259 |
| C | -1.0347051744 | -0.1969448753 | -0.7175881057 |
| H | -1.697695989  | -0.365377446  | -1.5645412253 |
| C | -0.8405051095 | -1.3448154924 | 0.2447012199  |
| H | 2.2069678351  | -1.5212878403 | -1.1376088189 |
| H | -1.539861294  | -1.2244173826 | 1.0866309375  |
| H | 0.1638461066  | -1.2599000891 | 0.6840479689  |
| C | -1.0215780685 | -2.7424874404 | -0.3500272792 |
| H | -2.020094359  | -2.8204924303 | -0.8037419759 |
| C | -0.8428476503 | -3.8603784349 | 0.6826274122  |

|   |               |               |               |
|---|---------------|---------------|---------------|
| H | -0.3034816957 | -2.8880027484 | -1.1657689898 |
| H | -1.5606135474 | -3.718011619  | 1.5020131428  |
| H | 0.1547491617  | -3.7731941778 | 1.1352188967  |
| C | -1.0148504879 | -5.2597980532 | 0.0856513294  |
| H | -2.0144410263 | -5.3830376319 | -0.3468150907 |
| H | -0.8796780504 | -6.0405755512 | 0.8412045031  |
| H | -0.2865005357 | -5.4387309477 | -0.7136584974 |
| C | -3.0411842366 | 2.376032974   | -0.675239699  |
| H | -1.3995472208 | 2.1519252091  | -2.0617411258 |
| H | -1.0469298834 | 3.2121838678  | -0.7048482095 |
| H | -3.4676812559 | 3.1873373109  | -1.2817934664 |
| C | -3.3637783714 | 2.6321368037  | 0.8014790655  |
| H | -3.538419906  | 1.4515581     | -0.9984334155 |
| C | -4.864658362  | 2.7870425419  | 1.0621444176  |
| H | -2.834928987  | 3.5360059776  | 1.1349156868  |
| H | -2.9706280174 | 1.8068221764  | 1.4080633258  |
| H | -5.4102523545 | 1.8847563691  | 0.7627783436  |
| H | -5.2801171446 | 3.6265342045  | 0.4928254097  |
| H | -5.0735369102 | 2.9665656679  | 2.1218691248  |
| C | 3.0063662157  | 0.3722346549  | 0.7395922356  |
| C | 4.1643252572  | 1.3841661693  | 0.5754013697  |
| H | 3.7912446914  | 2.4119500004  | 0.5366703147  |
| H | 4.8672022346  | 1.3102018313  | 1.4135165996  |
| H | 4.7163466872  | 1.1948596693  | -0.3511264666 |
| C | 2.2624278248  | 0.6657403052  | 2.0628632837  |
| H | 2.9500432608  | 0.581910748   | 2.9121268864  |
| H | 1.8394163477  | 1.6741165131  | 2.081651539   |
| H | 1.4438768454  | -0.0441128728 | 2.2186151914  |
| C | 3.6135455721  | -1.0390799909 | 0.8414829723  |
| H | 4.3060545574  | -1.0837353651 | 1.6883710388  |
| H | 2.843943339   | -1.8014461951 | 1.002684674   |
| H | 4.176054716   | -1.3048507745 | -0.0593345815 |
| H | 4.176054716   | -1.3048507745 | -0.0593345815 |

TS exo 0182

E(RB3LYP) = -706.413399853 A.U.

First frequency = -510.8825  $\text{cm}^{-1}$



|   |               |               |               |
|---|---------------|---------------|---------------|
| H | 1.1664763334  | -0.4355378731 | -3.2893789061 |
| C | 1.0208302569  | 0.2037687316  | -2.4221794551 |
| H | 0.3856955916  | 1.0630152199  | -2.6114166797 |
| C | 2.0083064524  | 0.2474562678  | -1.4479128713 |
| C | 1.8422261298  | 0.9427047765  | -0.2286355377 |
| C | 0.6843616872  | 1.6853436362  | -0.0568101199 |
| H | 0.4635669426  | 2.1652825995  | 0.8874327025  |
| H | 0.2023530678  | 2.1443351311  | -0.9100083616 |
| C | -1.0774459412 | 0.1747285639  | -0.3821970666 |
| H | -0.9334995502 | -0.1086745519 | 0.6575506859  |
| C | -2.2056919451 | 1.1459476848  | -0.6648988535 |
| C | -0.6504813331 | -0.720650301  | -1.3644109712 |
| H | -1.2113649767 | -0.7184813217 | -2.2993004615 |
| C | -0.0540186134 | -2.0526954627 | -0.9651920887 |
| H | 2.8246391332  | -0.4660302103 | -1.5286442615 |
| H | 0.7030382304  | -1.8822053236 | -0.1911512322 |
| H | 0.4731159991  | -2.5033964135 | -1.815288711  |
| C | -1.1003182496 | -3.046953987  | -0.4341652841 |
| H | -1.6181624378 | -2.6002779131 | 0.4253923637  |
| C | -0.4933372266 | -4.3934505346 | -0.0243500198 |
| H | -1.8721490092 | -3.21101839   | -1.1995954876 |
| H | 0.2806917673  | -4.2219661723 | 0.7363722464  |
| H | 0.0232985172  | -4.8353706646 | -0.8873481895 |
| C | -1.533397103  | -5.3805550956 | 0.513026681   |
| H | -2.3011861175 | -5.5921372075 | -0.2400376006 |
| H | -2.0415629994 | -4.975063326  | 1.3954815677  |
| H | -1.0758874273 | -6.3331499134 | 0.7998006734  |
| C | -2.572068619  | 2.077096531   | 0.4957163761  |
| H | -3.1033935506 | 0.5708732395  | -0.9399963259 |
| H | -1.965716637  | 1.7451249111  | -1.5570589766 |
| H | -2.7662258084 | 1.4719572192  | 1.3928737985  |
| C | -3.7952349068 | 2.9522071368  | 0.2014115025  |
| H | -1.7214449703 | 2.7225623958  | 0.7431415858  |
| C | -4.1558331894 | 3.883722591   | 1.3620358935  |
| H | -4.6535565069 | 2.3088201664  | -0.035549935  |
| H | -3.6037318635 | 3.547214253   | -0.7021624558 |
| H | -4.3807206166 | 3.3124088806  | 2.2699837563  |
| H | -5.0315737853 | 4.4980195132  | 1.1289397214  |

|   |              |               |               |
|---|--------------|---------------|---------------|
| H | -3.326045288 | 4.5604325999  | 1.5962855766  |
| C | 2.847816987  | 0.6970905433  | 0.9160010587  |
| C | 2.8449466379 | -0.7909133275 | 1.3366874296  |
| H | 3.5804369396 | -0.9679528868 | 2.1300443297  |
| H | 1.8611774921 | -1.0840030414 | 1.7182141966  |
| H | 3.091280681  | -1.4510217229 | 0.5003424797  |
| C | 4.2616467822 | 1.0839575359  | 0.4239126697  |
| H | 4.9999457892 | 0.9249088879  | 1.2183075755  |
| H | 4.5693778398 | 0.488212841   | -0.4401907559 |
| H | 4.2956156912 | 2.1383726385  | 0.1313523596  |
| C | 2.5303375448 | 1.541846289   | 2.1636149775  |
| H | 1.5611024758 | 1.2759509089  | 2.5982100639  |
| H | 3.2917313521 | 1.3711111677  | 2.9318271642  |
| H | 2.5199914505 | 2.6119691487  | 1.9333813267  |
| H | 2.5199914505 | 2.6119691487  | 1.9333813267  |

TS exo 0185

E(RB3LYP) = -706.413290488 A.U.

First frequency = -520.0538  $\text{cm}^{-1}$

|   |               |               |               |
|---|---------------|---------------|---------------|
| H | 0.1774939918  | -0.2204412596 | -3.0547942368 |
| C | 0.3638981606  | 0.3715938914  | -2.1625528639 |
| H | -0.2438408746 | 1.2648399947  | -2.0889793289 |
| C | 1.6042852014  | 0.2941284316  | -1.5482550477 |
| C | 1.8794822583  | 0.9042601632  | -0.3038146652 |
| C | 0.8729589768  | 1.6653286651  | 0.2755649909  |
| H | 0.9820936193  | 2.0802606279  | 1.2703294342  |
| H | 0.1904696523  | 2.2191857762  | -0.3557767089 |
| C | -0.8927526261 | 0.2689722579  | 0.5283376957  |
| H | -0.3771808308 | -0.1636655354 | 1.3830467715  |
| C | -1.9501816411 | 1.2941437501  | 0.9021605587  |
| C | -0.9672894832 | -0.5322738595 | -0.614649935  |
| H | -1.8129261714 | -0.3854269063 | -1.2825221234 |
| C | -0.4031290061 | -1.9365504706 | -0.5788686726 |
| H | 2.2999984908  | -0.4551691009 | -1.9182598394 |
| H | 0.601665403   | -1.9044004723 | -0.1409911031 |
| H | -0.2815902409 | -2.3253240729 | -1.5974626236 |
| C | -1.2723730526 | -2.9121470559 | 0.2329329045  |

|   |               |               |               |
|---|---------------|---------------|---------------|
| H | -1.3840459643 | -2.5291666666 | 1.2564859715  |
| C | -0.6987604449 | -4.3328863733 | 0.2771711238  |
| H | -2.286194222  | -2.9394279786 | -0.1912462896 |
| H | 0.3157697701  | -4.2977612569 | 0.6975554966  |
| H | -0.5883672682 | -4.7108613454 | -0.7484636578 |
| C | -1.5603285094 | -5.3016671659 | 1.0920828475  |
| H | -2.5703861002 | -5.3777487463 | 0.6732964992  |
| H | -1.6595085986 | -4.9626120226 | 2.1296790223  |
| H | -1.1298167388 | -6.3083372162 | 1.1097731584  |
| C | -2.6547047295 | 2.0029999704  | -0.2614856445 |
| H | -1.5094115238 | 2.0540159057  | 1.5609496946  |
| H | -2.71534054   | 0.7896711972  | 1.5132291059  |
| H | -1.9132294357 | 2.4810927542  | -0.9156574172 |
| C | -3.6584899149 | 3.0612463265  | 0.2103148012  |
| H | -3.1797363778 | 1.2682466784  | -0.8852116188 |
| C | -4.3768213268 | 3.7602320634  | -0.9472144828 |
| H | -3.1355766994 | 3.8070580519  | 0.8242056332  |
| H | -4.3972839247 | 2.5880049149  | 0.8713774741  |
| H | -4.9346505412 | 3.0403645766  | -1.5570401408 |
| H | -3.6618995237 | 4.2658349541  | -1.6064830187 |
| H | -5.0862087953 | 4.5117120376  | -0.5858505607 |
| C | 3.1693445995  | 0.5198784576  | 0.4497258851  |
| C | 3.3203970798  | 1.2878723693  | 1.7758181848  |
| H | 2.5219227354  | 1.0394456676  | 2.4826924197  |
| H | 4.2713298835  | 1.0259353634  | 2.2514047034  |
| H | 3.3111710511  | 2.3708750675  | 1.6165446864  |
| C | 3.1808137969  | -0.9929469736 | 0.7714823139  |
| H | 3.1152111882  | -1.6014889419 | -0.1347962437 |
| H | 4.1044544209  | -1.2691542656 | 1.2933959836  |
| H | 2.3365566128  | -1.2587084043 | 1.4163718982  |
| C | 4.3860006878  | 0.8603126567  | -0.4412712816 |
| H | 4.4113024065  | 1.9303820214  | -0.6712095341 |
| H | 5.3195875556  | 0.5975245947  | 0.0694093275  |
| H | 4.3612285891  | 0.3162276072  | -1.3897467855 |
| H | 4.3612285891  | 0.3162276072  | -1.3897467855 |

TS<sub>exo</sub> 0190

E(RB3LYP) = -706.414388044 A.U.

First frequency =  $-492.8494 \text{ cm}^{-1}$

|   |               |               |               |
|---|---------------|---------------|---------------|
| H | 0.5112079969  | -1.2937340855 | -2.6003444426 |
| C | 0.7530300691  | -0.3946502577 | -2.041248828  |
| H | 0.2810609857  | 0.5037760092  | -2.4193053145 |
| C | 1.9172550015  | -0.3522737374 | -1.2945911932 |
| C | 2.2357182341  | 0.726158659   | -0.4383860334 |
| C | 1.3792529247  | 1.8226263477  | -0.4418737919 |
| H | 1.5295580379  | 2.6426700584  | 0.2540009148  |
| H | 0.886331298   | 2.1163652301  | -1.3599561725 |
| C | -0.6436788252 | 1.0665121243  | 0.1637818214  |
| H | -0.3280283869 | 1.1678936778  | 1.200610801   |
| C | -1.5076134306 | 2.1947401571  | -0.3588163204 |
| C | -0.7831704304 | -0.2322091406 | -0.3241548177 |
| H | -1.5282095886 | -0.4043702849 | -1.0956205956 |
| C | -0.3900799739 | -1.4036246207 | 0.5473567854  |
| H | 2.4803644591  | -1.2752549275 | -1.2061197029 |
| H | -0.9207000656 | -1.3269403578 | 1.5090745566  |
| H | 0.6762068886  | -1.3037622359 | 0.792726643   |
| C | -0.6571551495 | -2.7903183931 | -0.0492455652 |
| H | -0.1376836929 | -2.8806697779 | -1.0114395237 |
| C | -2.1456202176 | -3.1101189001 | -0.2419515669 |
| H | -0.2167817007 | -3.5513280646 | 0.6087220121  |
| H | -2.6057298941 | -2.3641945205 | -0.9023250278 |
| H | -2.6600586792 | -3.0153519538 | 0.7243449849  |
| C | -2.3819637862 | -4.5092557582 | -0.8176099878 |
| H | -3.4491467892 | -4.7196948084 | -0.9426628573 |
| H | -1.9636494458 | -5.2812159213 | -0.1614505171 |
| H | -1.9032948714 | -4.6168061647 | -1.7978196854 |
| C | -2.8629247404 | 2.3200980955  | 0.3694978738  |
| H | -1.6887281455 | 2.0454571788  | -1.432980141  |
| H | -0.9815936409 | 3.1527262514  | -0.2654546204 |
| H | -2.6788222181 | 2.4714591516  | 1.4426974203  |
| C | -3.8098654423 | 1.129033585   | 0.184880472   |
| H | -3.3640977132 | 3.2320304698  | 0.0160689642  |
| C | -5.1605511766 | 1.3360914479  | 0.8762748512  |
| H | -3.3348061244 | 0.2197748927  | 0.570481692   |
| H | -3.9669522971 | 0.9567801773  | -0.8892596747 |

|   |               |               |               |
|---|---------------|---------------|---------------|
| H | -5.6766329774 | 2.2197651857  | 0.4834979161  |
| H | -5.0313407002 | 1.4834296837  | 1.9547933569  |
| H | -5.8205174315 | 0.4739054749  | 0.7350975193  |
| C | 3.359444417   | 0.637781454   | 0.6150371847  |
| C | 4.1193251063  | -0.7001205915 | 0.5607440706  |
| H | 4.5747819522  | -0.8677327718 | -0.4206290688 |
| H | 4.9240520774  | -0.6989630257 | 1.303185804   |
| H | 3.4647263505  | -1.5489169352 | 0.7845670618  |
| C | 4.3746106724  | 1.7768234575  | 0.362315708   |
| H | 4.8167117666  | 1.6878774015  | -0.6355046626 |
| H | 3.8968228006  | 2.7587651545  | 0.4284514694  |
| H | 5.1853545738  | 1.745055673   | 1.0995803709  |
| C | 2.7675393555  | 0.7927596466  | 2.034961028   |
| H | 2.0543183233  | -0.0089678708 | 2.2513252067  |
| H | 3.564084424   | 0.7508488923  | 2.7866118022  |
| H | 2.2471582347  | 1.7466229238  | 2.160227327   |
| H | 2.2471582347  | 1.7466229238  | 2.160227327   |

TS exo 0194

E(RB3LYP) = -706.413845627 A.U.

First frequency = -511.8648 cm<sup>-1</sup>

|   |               |               |               |
|---|---------------|---------------|---------------|
| H | 0.0455516221  | -1.0791571304 | -2.637755706  |
| C | 0.3225025386  | -0.2583677395 | -1.9831094208 |
| H | -0.149177798  | 0.6839092388  | -2.2362476745 |
| C | 1.5357928756  | -0.3003779657 | -1.3165085567 |
| C | 1.9157978404  | 0.6682044647  | -0.3595367538 |
| C | 1.0584014603  | 1.7441368971  | -0.1635048106 |
| H | 1.2401350039  | 2.4754457304  | 0.6151091057  |
| H | 0.4941531384  | 2.1328238121  | -1.0015821376 |
| C | -0.9469321251 | 0.8811328337  | 0.42386691    |
| H | -0.5839012568 | 0.8331689405  | 1.4483526202  |
| C | -1.823668101  | 2.0689487521  | 0.0952947397  |
| C | -1.1181192564 | -0.33266257   | -0.2440315327 |
| H | -1.9163026111 | -0.3916949073 | -0.9831368252 |
| C | -0.7421872048 | -1.6223719862 | 0.4505307085  |
| H | 2.1063839853  | -1.2246502663 | -1.3719901872 |
| H | -1.3678201722 | -1.7267151743 | 1.3508870018  |

|   |               |               |               |
|---|---------------|---------------|---------------|
| H | 0.2877888967  | -1.53189666   | 0.8172533803  |
| C | -0.8781716595 | -2.8972126356 | -0.3849837259 |
| H | -1.8963793391 | -2.9606495986 | -0.7954833948 |
| C | -0.5719900882 | -4.1691152074 | 0.4134562395  |
| H | -0.2037182277 | -2.8459219139 | -1.2476364499 |
| H | -1.2505319359 | -4.2308204432 | 1.2751734373  |
| H | 0.4416734008  | -4.0945732479 | 0.8309505568  |
| C | -0.6891719667 | -5.4446468677 | -0.4254400232 |
| H | -0.4646707717 | -6.3386886388 | 0.1653902009  |
| H | 0.0040185195  | -5.4225698486 | -1.2742459958 |
| H | -1.7013288684 | -5.5576906    | -0.8306739147 |
| C | -3.2079706102 | 1.9799496792  | 0.7656149148  |
| H | -1.9458983275 | 2.132722513   | -0.9942066949 |
| H | -1.3408457734 | 3.0045328123  | 0.4069350893  |
| H | -3.7179607823 | 1.0746520896  | 0.4094437756  |
| C | -4.1040520973 | 3.2047994741  | 0.5265531962  |
| H | -3.0647535716 | 1.8432975097  | 1.8457155866  |
| C | -4.5045708532 | 3.4091461676  | -0.9391502709 |
| H | -3.5919433813 | 4.1043320539  | 0.8952300667  |
| H | -5.0118207846 | 3.1009405799  | 1.1345495521  |
| H | -3.6363071919 | 3.6141589104  | -1.573563992  |
| H | -5.1955252701 | 4.2514851588  | -1.0475025801 |
| H | -5.0014496731 | 2.5164876639  | -1.3371084717 |
| C | 3.1467635007  | 0.404140213   | 0.5317086927  |
| C | 4.3893879811  | 0.2744818124  | -0.3801775465 |
| H | 4.5430365235  | 1.190715091   | -0.9592801287 |
| H | 5.2883460203  | 0.0935771072  | 0.2204369707  |
| H | 4.2884572285  | -0.5537955517 | -1.0875611499 |
| C | 3.4019393113  | 1.5510073956  | 1.5266721814  |
| H | 2.5731650465  | 1.6664472356  | 2.23305963    |
| H | 4.3046495106  | 1.3432281923  | 2.1106083294  |
| H | 3.5482573335  | 2.5059455155  | 1.0119923292  |
| C | 2.978259917   | -0.900328576  | 1.3447816819  |
| H | 2.8098716793  | -1.765585051  | 0.6973556117  |
| H | 3.8762860602  | -1.1001620882 | 1.9408860693  |
| H | 2.129196143   | -0.8231518764 | 2.0316331244  |
| H | 2.129196143   | -0.8231518764 | 2.0316331244  |

TS exo 0198

E(RB3LYP) = -706.414105297 A.U.

First frequency = -487.2700 cm<sup>-1</sup>

|   |               |               |               |
|---|---------------|---------------|---------------|
| H | 0.34791399    | -1.6281671555 | -2.4331240662 |
| C | 0.5931639737  | -0.6940349855 | -1.9366183555 |
| H | 0.0644121245  | 0.1675503267  | -2.325359816  |
| C | 1.7993931862  | -0.5741898761 | -1.2703978261 |
| C | 2.1350001736  | 0.5605047217  | -0.4965363287 |
| C | 1.2449575475  | 1.6285113608  | -0.5022773299 |
| H | 1.4102733962  | 2.489473951   | 0.1384169431  |
| H | 0.6773155675  | 1.8536813794  | -1.3960089847 |
| C | -0.7191703046 | 0.8254248103  | 0.2711668486  |
| H | -0.3392975411 | 1.0016319262  | 1.2753340103  |
| C | -1.651515873  | 1.8859679557  | -0.2707999998 |
| C | -0.8401012956 | -0.501301366  | -0.1348727386 |
| H | -1.6302857997 | -0.741952546  | -0.841655238  |
| C | -0.345872713  | -1.6040814813 | 0.7736301952  |
| H | 2.3983419491  | -1.4730687896 | -1.169940461  |
| H | -0.9179503037 | -1.5645119084 | 1.7139109089  |
| H | 0.6915074491  | -1.3715682432 | 1.0503863252  |
| C | -0.414377714  | -3.0339404478 | 0.2232316101  |
| H | 0.2195624724  | -3.116404642  | -0.6676338443 |
| C | -1.8299874648 | -3.5177444424 | -0.1157831105 |
| H | 0.0191075064  | -3.7137876544 | 0.969239341   |
| H | -2.2658592966 | -2.8790281222 | -0.8942301941 |
| H | -2.4725366952 | -3.4015706094 | 0.7678720803  |
| C | -1.8584232919 | -4.9744558142 | -0.5876871903 |
| H | -2.8753481707 | -5.3019532698 | -0.8273189384 |
| H | -1.4636138969 | -5.6462879844 | 0.1831248974  |
| H | -1.244267137  | -5.1083382187 | -1.4857289371 |
| C | -3.0279307932 | 1.874000706   | 0.4174644514  |
| H | -1.7915799607 | 1.7323243015  | -1.3507626063 |
| H | -1.2071168257 | 2.8832213113  | -0.1580616699 |
| H | -3.4861826691 | 0.8849394625  | 0.2838497985  |
| C | -3.9766830665 | 2.95789135    | -0.105976599  |
| H | -2.8906028005 | 1.9999992099  | 1.5006624022  |
| C | -5.3446536426 | 2.936830191   | 0.582065025   |

|   |               |               |               |
|---|---------------|---------------|---------------|
| H | -4.1068350249 | 2.8309380835  | -1.1895275648 |
| H | -3.5105507117 | 3.9433696809  | 0.0299383193  |
| H | -5.2443051717 | 3.0933779329  | 1.6622015278  |
| H | -5.8445187332 | 1.9726638795  | 0.43457835    |
| H | -6.0047388818 | 3.7182314276  | 0.1915140745  |
| C | 3.3315195084  | 0.5675196901  | 0.4777878529  |
| C | 4.2954818298  | 1.7085238363  | 0.0764827871  |
| H | 4.6673203614  | 1.5614120416  | -0.9428812656 |
| H | 3.7968692656  | 2.681707897   | 0.1117777679  |
| H | 5.1574263008  | 1.7450026448  | 0.7529883459  |
| C | 2.8399914118  | 0.8065154524  | 1.9239997086  |
| H | 3.6901045257  | 0.8344175336  | 2.6151526486  |
| H | 2.3040563323  | 1.7546235898  | 2.024110128   |
| H | 2.1672338343  | 0.0056249341  | 2.2469113324  |
| C | 4.1205460316  | -0.7544792905 | 0.4578061064  |
| H | 4.9721239397  | -0.6875085924 | 1.1427494122  |
| H | 3.503810025   | -1.6005974141 | 0.7784328002  |
| H | 4.5150284732  | -0.9760201433 | -0.5391358877 |
| H | 4.5150284732  | -0.9760201433 | -0.5391358877 |

TS exo 0204

E(RB3LYP) = -706.413555399 A.U.

First frequency = -513.2362  $\text{cm}^{-1}$

|   |               |               |               |
|---|---------------|---------------|---------------|
| H | 0.4868125888  | -0.9076113888 | -2.9189042094 |
| C | 0.6769698694  | -0.1357989397 | -2.1792206236 |
| H | 0.2218787033  | 0.8192747128  | -2.4138787215 |
| C | 1.8091273364  | -0.2196062866 | -1.3859338611 |
| C | 2.0679122902  | 0.6793247707  | -0.3261178527 |
| C | 1.1792642533  | 1.7339700413  | -0.1516301885 |
| H | 1.2652479582  | 2.4094557634  | 0.6912296877  |
| H | 0.709637757   | 2.1801431875  | -1.0190393584 |
| C | -0.8617003775 | 0.8272656815  | 0.1506545714  |
| H | -0.6139331305 | 0.7084954874  | 1.2033726696  |
| C | -1.7112915675 | 2.0323088138  | -0.1873910431 |
| C | -0.9477145217 | -0.3383768933 | -0.6128749558 |
| H | -1.6589454284 | -0.3485761801 | -1.4379411419 |
| C | -0.6321748177 | -1.6716105377 | 0.0280517123  |



|   |               |               |               |
|---|---------------|---------------|---------------|
| H | 2.3959129288  | -1.1334900854 | -1.4443007211 |
| H | -1.3146549412 | -1.8111769179 | 0.8784428134  |
| H | 0.3743558187  | -1.6197715102 | 0.4620676272  |
| C | -0.7267528578 | -2.8864271249 | -0.8994652132 |
| H | -1.7399002033 | -2.9421747533 | -1.3236611407 |
| C | -0.3873440877 | -4.2207854192 | -0.217150784  |
| H | -0.0475235342 | -2.7415528014 | -1.7464072155 |
| H | 0.6262923783  | -4.1594125947 | 0.2029638229  |
| H | -0.3523057736 | -5.0079337356 | -0.9811029448 |
| C | -1.3711701754 | -4.6381016087 | 0.8821017454  |
| H | -1.1186018331 | -5.6240535256 | 1.2858740055  |
| H | -2.3945957773 | -4.6892806301 | 0.4921369366  |
| H | -1.3716618586 | -3.9318611666 | 1.7183224438  |
| C | -3.162462651  | 1.8944639594  | 0.3060814006  |
| H | -1.7185869908 | 2.1797111282  | -1.2773154009 |
| H | -1.2760067477 | 2.9437306902  | 0.2422852639  |
| H | -3.6098749654 | 0.9975514665  | -0.1427587112 |
| C | -4.0289010136 | 3.118056622   | -0.0121505622 |
| H | -3.1595383467 | 1.7205326692  | 1.3913469304  |
| C | -5.4720907797 | 2.9717794399  | 0.4787357307  |
| H | -4.0241952424 | 3.2911100455  | -1.097124653  |
| H | -3.5744287519 | 4.0106360639  | 0.4391354321  |
| H | -5.9584405627 | 2.104327674   | 0.0180556073  |
| H | -6.0711782218 | 3.8564643617  | 0.2394355288  |
| H | -5.5058164819 | 2.8293330789  | 1.5649398655  |
| C | 3.1957384597  | 0.3590570897  | 0.6763119028  |
| C | 4.5337492651  | 0.3021003177  | -0.0975936858 |
| H | 4.5233339937  | -0.4739239895 | -0.8684998145 |
| H | 4.7384885069  | 1.2583328663  | -0.5896860676 |
| H | 5.3626668155  | 0.0836167384  | 0.5856091163  |
| C | 3.3229644267  | 1.43318291    | 1.7720428797  |
| H | 4.1580579902  | 1.1893216473  | 2.4370068553  |
| H | 3.5123419707  | 2.4234387072  | 1.3457323897  |
| H | 2.4194164331  | 1.4928286733  | 2.3878664189  |
| C | 2.9557378951  | -1.0011420919 | 1.3714861265  |
| H | 2.8763621039  | -1.8192714718 | 0.6499948194  |
| H | 3.7826606792  | -1.236118365  | 2.0517145201  |
| H | 2.0323172472  | -0.979503048  | 1.9591675263  |

H 2.0323172472 -0.979503048 1.9591675263

TS exo 0207

E(RB3LYP) = -706.413430946 A.U.

First frequency = -493.9355 cm<sup>-1</sup>

H 1.1023180747 -0.3443701047 -3.3954375106  
C 0.9810815307 0.2610184931 -2.5008219303  
H 0.3271697231 1.1163964553 -2.6298188507  
C 1.9798590955 0.2481111602 -1.5399837202  
C 1.8364756978 0.889941552 -0.2889944971  
C 0.699004788 1.6543418452 -0.074739205  
H 0.5077499225 2.0912957383 0.8993163723  
H 0.2212731036 2.173500322 -0.8951934543  
C -1.0959948476 0.1889447451 -0.4079617005  
H -0.9438532433 -0.0900736476 0.6316358924  
C -2.2074567071 1.1810957297 -0.684137693  
C -0.688080691 -0.7124388161 -1.3877360223  
H -1.2472941148 -0.7156206205 -2.3226308348  
C -0.0450791264 -2.0216658168 -0.9910025038  
H 2.7828316137 -0.468578057 -1.6721189569  
H 0.7513076848 -1.8144842263 -0.2644657368  
H 0.4452848964 -2.481560091 -1.8577598856  
C -1.0348645441 -3.0253433396 -0.3754718605  
H -1.5194835772 -2.5658150963 0.4964098373  
C -0.3696115838 -4.3414244096 0.0424635722  
H -1.8403114919 -3.2336518886 -1.0938079516  
H 0.4371393743 -4.1249917491 0.7564800339  
H 0.1147202688 -4.7964637307 -0.8323587556  
C -1.3520175727 -5.3385582439 0.663237544  
H -1.8256781669 -4.9188586445 1.5581382203  
H -0.8532276655 -6.2687110278 0.9547621085  
H -2.1509361594 -5.5948638097 -0.0420045079  
C -2.5548417288 2.1086041091 0.4851972112  
H -3.1152726779 0.6247911021 -0.9638189153  
H -1.9563447405 1.7838758024 -1.5706670058  
H -2.7661059556 1.4989046296 1.3753623926  
C -3.7552425286 3.0166007603 0.1973020324

|   |               |               |               |
|---|---------------|---------------|---------------|
| H | -1.6888795428 | 2.7300573024  | 0.7415782601  |
| C | -4.097154865  | 3.9430610493  | 1.3675822005  |
| H | -4.6280754053 | 2.3970186041  | -0.0498593803 |
| H | -3.5462381552 | 3.617161749   | -0.6986788509 |
| H | -3.2519754616 | 4.5965815957  | 1.6124271836  |
| H | -4.339121172  | 3.3668721746  | 2.2680246451  |
| H | -4.9568352597 | 4.5812004658  | 1.1388349372  |
| C | 2.7924288464  | 0.6069464457  | 0.8904703822  |
| C | 3.9361405684  | -0.3515417094 | 0.5109717886  |
| H | 4.6016666477  | -0.4910105929 | 1.3691462786  |
| H | 3.5605387196  | -1.3382120173 | 0.2207670825  |
| H | 4.5380898679  | 0.042845826   | -0.3141312111 |
| C | 3.4202619919  | 1.9393401973  | 1.3611802773  |
| H | 4.1021364624  | 1.7708912635  | 2.2028849756  |
| H | 3.9877948598  | 2.4080921204  | 0.5504956955  |
| H | 2.6541042813  | 2.6498048085  | 1.685079645   |
| C | 2.009313997   | -0.0272236823 | 2.0632950594  |
| H | 2.6774597366  | -0.2124726621 | 2.9121381073  |
| H | 1.2012855878  | 0.6207212646  | 2.4145485954  |
| H | 1.5662855842  | -0.9835420441 | 1.7666867906  |
| H | 1.5662855842  | -0.9835420441 | 1.7666867906  |

TS exo 0214

E(RB3LYP) = -706.412867568 A.U.

First frequency = -516.2878  $\text{cm}^{-1}$

|   |               |               |               |
|---|---------------|---------------|---------------|
| H | 1.3134016232  | -0.5002914356 | -3.3470422977 |
| C | 1.1436403941  | 0.1291887829  | -2.4769444841 |
| H | 0.4542090361  | 0.9480228822  | -2.6560192167 |
| C | 2.1458623637  | 0.2375539763  | -1.5220021786 |
| C | 1.9576290753  | 0.924119569   | -0.3020393513 |
| C | 0.7570827147  | 1.5914834531  | -0.1118590881 |
| H | 0.5220912326  | 2.0578187428  | 0.8358373438  |
| H | 0.234993081   | 2.020593711   | -0.9571480773 |
| C | -0.8981189439 | -0.031261939  | -0.4041702982 |
| H | -0.7150707186 | -0.3001110708 | 0.6320416081  |
| C | -2.0944111381 | 0.8617825531  | -0.6667750159 |
| C | -0.4369793979 | -0.9031027518 | -1.3943406386 |

|   |               |               |               |
|---|---------------|---------------|---------------|
| H | -1.0173629441 | -0.9329781558 | -2.3175895236 |
| C | 0.2392093106  | -2.207784164  | -1.0254726537 |
| H | 3.0032663295  | -0.4240372327 | -1.6169632655 |
| H | 0.885315947   | -2.0393720821 | -0.1560329566 |
| H | 0.9000430106  | -2.5297883797 | -1.8384989416 |
| C | -0.7437994824 | -3.3562934583 | -0.7171522703 |
| H | -1.3973659436 | -3.5153178637 | -1.5870207722 |
| C | -1.6100616523 | -3.1583148049 | 0.5319342051  |
| H | -0.1645860961 | -4.2833007688 | -0.6017122027 |
| H | -2.2351682664 | -2.2666710696 | 0.4077781408  |
| H | -0.9583709736 | -2.9545297886 | 1.3932179636  |
| C | -2.4978490714 | -4.3695132201 | 0.8325387102  |
| H | -3.175213597  | -4.5774201186 | -0.0039040815 |
| H | -3.1112691779 | -4.2077778503 | 1.7250564826  |
| H | -1.8962729125 | -5.2704851546 | 0.9995077732  |
| C | -2.5102228507 | 1.7536329975  | 0.5077770135  |
| H | -2.9538212327 | 0.2290425803  | -0.9377248971 |
| H | -1.9072007875 | 1.4843873242  | -1.5555784796 |
| H | -2.6547796809 | 1.1264206158  | 1.3991395969  |
| C | -3.7915943401 | 2.5486535875  | 0.2351545213  |
| H | -1.7014833694 | 2.4509602226  | 0.755154298   |
| C | -4.2030696377 | 3.4392840329  | 1.4108442099  |
| H | -4.6071560072 | 1.8522589301  | -0.0030441461 |
| H | -3.6485553726 | 3.1663400118  | -0.6621411872 |
| H | -4.3810167008 | 2.8427858164  | 2.3129850969  |
| H | -5.1199813588 | 3.9964608494  | 1.1930436891  |
| H | -3.4182675937 | 4.1670126194  | 1.647151577   |
| C | 2.9897825284  | 0.7359514432  | 0.8292718509  |
| C | 4.3774744402  | 1.1854239003  | 0.3169239478  |
| H | 5.1319835132  | 1.0663935188  | 1.1030074887  |
| H | 4.7029328975  | 0.5993258821  | -0.5472202798 |
| H | 4.3582949864  | 2.2383773514  | 0.0177911823  |
| C | 2.6491548655  | 1.5729043194  | 2.07610233    |
| H | 2.5804652398  | 2.6392807382  | 1.8384715612  |
| H | 1.7017659024  | 1.2614080538  | 2.5281302486  |
| H | 3.4300690994  | 1.4468919592  | 2.8333042165  |
| C | 3.0601439757  | -0.7483543245 | 1.2570412555  |
| H | 2.0959535135  | -1.0829211054 | 1.6541650448  |

|   |              |               |              |
|---|--------------|---------------|--------------|
| H | 3.3224682152 | -1.4007343877 | 0.4195376625 |
| H | 3.8141939516 | -0.8883659832 | 2.0403349726 |
| H | 3.8141939516 | -0.8883659832 | 2.0403349726 |

TS exo 0218

E(RB3LYP) = -706.413107392 A.U.

First frequency = -488.0493 cm<sup>-1</sup>

|   |               |               |               |
|---|---------------|---------------|---------------|
| H | 1.1541411232  | -0.7771022358 | -3.3043103074 |
| C | 1.204556911   | 0.0006461782  | -2.5468787828 |
| H | 0.7941399088  | 0.9536912093  | -2.8601015264 |
| C | 2.1654519328  | -0.0871169815 | -1.5527128732 |
| C | 2.2014212938  | 0.7964447094  | -0.4500373134 |
| C | 1.2954279805  | 1.8481874426  | -0.4350365373 |
| H | 1.2134779803  | 2.4984753678  | 0.430518002   |
| H | 0.9789962516  | 2.3085952193  | -1.361739735  |
| C | -0.7743669585 | 0.8640534559  | -0.5145611398 |
| H | -0.6575746046 | 0.7147978491  | 0.553516507   |
| C | -1.5669596316 | 2.0747544624  | -0.9622556932 |
| C | -0.6768737366 | -0.2607137569 | -1.3317045532 |
| H | -1.2323285986 | -0.244955052  | -2.2686533122 |
| C | -0.4189699643 | -1.62291785   | -0.7293422474 |
| H | 2.7498764941  | -0.9996819545 | -1.5104791645 |
| H | 0.4388895474  | -1.5482661368 | -0.0481490584 |
| H | -0.125632464  | -2.333478476  | -1.5118513223 |
| C | -1.6221548827 | -2.1864314413 | 0.0453215776  |
| H | -1.8926427732 | -1.4874102001 | 0.8463472492  |
| C | -1.3562421583 | -3.5710929661 | 0.6457173108  |
| H | -2.4959802429 | -2.236640691  | -0.6198482465 |
| H | -0.4757806646 | -3.5154122674 | 1.3008483948  |
| H | -1.0917984427 | -4.2717094569 | -0.1580843915 |
| C | -2.5499271687 | -4.1175453533 | 1.434057577   |
| H | -2.8130883482 | -3.4490660744 | 2.2618717446  |
| H | -2.3377262728 | -5.1051175764 | 1.8566825957  |
| H | -3.434499655  | -4.2113466257 | 0.7936483164  |
| C | -3.1064664695 | 1.9352396416  | -0.891663862  |
| H | -1.299347045  | 2.2843436245  | -2.0076626666 |
| H | -1.2674689889 | 2.962289233   | -0.3902136637 |

|   |               |               |               |
|---|---------------|---------------|---------------|
| H | -3.539290839  | 2.695750276   | -1.5551759392 |
| C | -3.7411532497 | 2.1140616656  | 0.4973669599  |
| H | -3.3970757399 | 0.9615044984  | -1.3078106725 |
| C | -3.4696272947 | 0.9917509322  | 1.5051629425  |
| H | -4.8271829013 | 2.2047886047  | 0.3639827387  |
| H | -3.4095616322 | 3.0733158582  | 0.9188575929  |
| H | -3.7510524905 | 0.0173733995  | 1.0915836599  |
| H | -4.0450852861 | 1.1447088649  | 2.4244921707  |
| H | -2.4140104749 | 0.9370725038  | 1.7839963445  |
| C | 3.0434457415  | 0.5002467379  | 0.8093467794  |
| C | 3.9746035873  | 1.7022159915  | 1.0902517799  |
| H | 4.5814499903  | 1.5214959234  | 1.9851241392  |
| H | 4.6520674771  | 1.8728732782  | 0.2470891938  |
| H | 3.4044547542  | 2.6219386381  | 1.2504166832  |
| C | 2.1111400336  | 0.2849610622  | 2.0241752339  |
| H | 1.4849855473  | 1.160348957   | 2.2194758708  |
| H | 1.4483278838  | -0.5713534426 | 1.8617991637  |
| H | 2.6998109315  | 0.0909718986  | 2.928133408   |
| C | 3.9204059566  | -0.7558558845 | 0.6547945373  |
| H | 3.3173063165  | -1.6597125594 | 0.5205934993  |
| H | 4.6036430365  | -0.6696881428 | -0.1963768821 |
| H | 4.5276801505  | -0.895808563  | 1.5550420352  |
| H | 4.5276801505  | -0.895808563  | 1.5550420352  |

TS exo 0229

E(RB3LYP) = -706.413188042 A.U.

First frequency = -518.6371 cm<sup>-1</sup>

|   |               |               |               |
|---|---------------|---------------|---------------|
| H | 0.4270280774  | -0.2946111971 | -3.0160750805 |
| C | 0.5489991047  | 0.3111516319  | -2.1219883072 |
| H | -0.1594114539 | 1.1258434731  | -2.038480835  |
| C | 1.7932078022  | 0.3766427604  | -1.5148574118 |
| C | 2.0024770233  | 1.0078171623  | -0.2679270478 |
| C | 0.9166830462  | 1.6405683176  | 0.3230137889  |
| H | 0.9839065047  | 2.060759806   | 1.3192859819  |
| H | 0.1690012053  | 2.1137042472  | -0.3003231077 |
| C | -0.6655509116 | 0.0464380852  | 0.5835691475  |
| H | -0.0957093679 | -0.3329716224 | 1.429089639   |

|   |               |               |               |
|---|---------------|---------------|---------------|
| C | -1.83123359   | 0.9379498508  | 0.9788834676  |
| C | -0.6618569008 | -0.746986534  | -0.5672701696 |
| H | -1.5200430308 | -0.6787558668 | -1.2297856407 |
| C | 0.056387878   | -2.0816881587 | -0.5519599402 |
| H | 2.5703882997  | -0.2827883866 | -1.8936506106 |
| H | 1.072439806   | -1.928961738  | -0.1713010856 |
| H | 0.1631045445  | -2.4631670883 | -1.5751421614 |
| C | -0.6454590858 | -3.14689839   | 0.3131621438  |
| H | -0.0293785698 | -4.0571686665 | 0.3271480899  |
| C | -2.0582909398 | -3.504575069  | -0.1621511161 |
| H | -0.6949701874 | -2.7915024607 | 1.3516405419  |
| H | -2.014277186  | -3.8314201635 | -1.2105734418 |
| H | -2.6834851595 | -2.602660694  | -0.1501356282 |
| C | -2.7154802138 | -4.5933447548 | 0.6904947073  |
| H | -2.1273903247 | -5.5181965688 | 0.6720519102  |
| H | -3.7234707519 | -4.8317999623 | 0.3352501477  |
| H | -2.7967252842 | -4.2768156203 | 1.7368280734  |
| C | -2.6370820081 | 1.5546696205  | -0.1712054567 |
| H | -1.4735960968 | 1.7461173979  | 1.6305006467  |
| H | -2.5183876336 | 0.3453919102  | 1.6033626916  |
| H | -1.9693359296 | 2.1113475911  | -0.8425319453 |
| C | -3.7466763557 | 2.4920921634  | 0.318537568   |
| H | -3.0865116493 | 0.7605860505  | -0.7812769271 |
| C | -4.5656029466 | 3.0958351507  | -0.8257071484 |
| H | -3.301094415  | 3.2971990998  | 0.9183308913  |
| H | -4.4113488698 | 1.9402158122  | 0.997087691   |
| H | -3.9283466551 | 3.6770562081  | -1.5020727631 |
| H | -5.3498334574 | 3.7619567139  | -0.4518353356 |
| H | -5.0485917347 | 2.3122993029  | -1.4207400779 |
| C | 3.334114757   | 0.7754592393  | 0.4747307348  |
| C | 4.4947012971  | 1.2687215116  | -0.4196037743 |
| H | 4.5288628366  | 0.7349191568  | -1.3736302327 |
| H | 4.3894691276  | 2.3362706447  | -0.6383390617 |
| H | 5.4566469086  | 1.1152700885  | 0.0829277756  |
| C | 3.4001473073  | 1.5437076688  | 1.8076235317  |
| H | 3.2597064184  | 2.6191940842  | 1.6594279857  |
| H | 2.6420601397  | 1.1942151763  | 2.5162278923  |
| H | 4.3788184899  | 1.3938118477  | 2.275323333   |

|   |              |               |               |
|---|--------------|---------------|---------------|
| C | 3.5301602266 | -0.7278056576 | 0.7813170099  |
| H | 2.725776653  | -1.1005885237 | 1.424119467   |
| H | 3.5372397455 | -1.3306617212 | -0.1310904953 |
| H | 4.4818100386 | -0.8947333293 | 1.2992755855  |
| H | 4.4818100386 | -0.8947333293 | 1.2992755855  |

TS<sub>exo</sub> 0232

E(RB3LYP) = -706.414101987 A.U.

First frequency = -511.2605 cm<sup>-1</sup>

|   |               |               |               |
|---|---------------|---------------|---------------|
| H | 0.2951124864  | -1.2215216026 | -2.4584043848 |
| C | 0.5655182429  | -0.3230096318 | -1.9117148571 |
| H | 0.0706340109  | 0.573669129   | -2.2654216551 |
| C | 1.7891007084  | -0.2643742942 | -1.2655494319 |
| C | 2.1633247946  | 0.8140132041  | -0.4318559903 |
| C | 1.2827546371  | 1.8858848582  | -0.3405226663 |
| H | 1.464367847   | 2.706930236   | 0.3428227263  |
| H | 0.6955258511  | 2.1643113817  | -1.206569653  |
| C | -0.664297985  | 1.0673984543  | 0.4098378386  |
| H | -0.2689636639 | 1.1052485816  | 1.4236721354  |
| C | -1.5726446762 | 2.2189126317  | 0.0331308637  |
| C | -0.8493004492 | -0.2025329798 | -0.1427967276 |
| H | -1.6525671537 | -0.3151722464 | -0.8651408484 |
| C | -0.4644668649 | -1.4316197031 | 0.6537577724  |
| H | 2.378364052   | -1.1775427077 | -1.2243476691 |
| H | -0.9603702623 | -1.3858442212 | 1.6358974246  |
| H | 0.6104390947  | -1.3849175103 | 0.8648707068  |
| C | -0.808973457  | -2.7764996461 | 0.0023152259  |
| H | -0.3187765118 | -2.8490216148 | -0.9765888457 |
| C | -2.3147486129 | -3.0230917378 | -0.1636449528 |
| H | -0.3867787588 | -3.5843493883 | 0.6148762355  |
| H | -2.7573042284 | -2.2356523197 | -0.7867471432 |
| H | -2.801266365  | -2.9396343636 | 0.8180599573  |
| C | -2.6274704752 | -4.3892747751 | -0.7805645577 |
| H | -2.2297512271 | -5.2017481345 | -0.1615823839 |
| H | -2.1768378663 | -4.4835774168 | -1.7753499391 |
| H | -3.7056953001 | -4.5473070196 | -0.8866978088 |
| C | -2.8529636975 | 2.2903727466  | 0.8965995758  |



|   |               |               |               |
|---|---------------|---------------|---------------|
| H | -1.8422801752 | 2.1375962894  | -1.0282000986 |
| H | -1.0458498888 | 3.1751126335  | 0.1393181582  |
| H | -2.5526080618 | 2.4080972112  | 1.9464672558  |
| C | -3.8061271124 | 1.0904113338  | 0.7844855149  |
| H | -3.3996772637 | 3.2059065186  | 0.6303300952  |
| C | -4.4291037171 | 0.9136095668  | -0.6042709598 |
| H | -4.6095993278 | 1.2171255924  | 1.5211932074  |
| H | -3.274384839  | 0.1739021359  | 1.0661737     |
| H | -4.9729689668 | 1.8151206835  | -0.9100042807 |
| H | -5.1348834434 | 0.0766482189  | -0.6172165166 |
| H | -3.6717490581 | 0.7141713668  | -1.3692534305 |
| C | 3.407335195   | 0.6746913453  | 0.4688981727  |
| C | 3.2616117061  | -0.5268575082 | 1.4314615149  |
| H | 3.120968392   | -1.4667541817 | 0.8901945981  |
| H | 4.1579986206  | -0.6322892921 | 2.0536766824  |
| H | 2.4029381026  | -0.3895588785 | 2.0966878383  |
| C | 4.6441787435  | 0.4547017691  | -0.4329220854 |
| H | 4.5481851235  | -0.4507035943 | -1.0391915996 |
| H | 4.7824986691  | 1.299743683   | -1.1150309431 |
| H | 5.5497187373  | 0.3543465274  | 0.1765738098  |
| C | 3.654226057   | 1.9343031077  | 1.319361706   |
| H | 2.8327631148  | 2.1183248258  | 2.0197106566  |
| H | 4.5677163661  | 1.8109001378  | 1.9103777106  |
| H | 3.7771523643  | 2.8247472708  | 0.6946584792  |
| H | 3.7771523643  | 2.8247472708  | 0.6946584792  |

TS exo 0245

E(RB3LYP) = -706.414602789 A.U.

First frequency = -492.3621  $\text{cm}^{-1}$

|   |               |               |               |
|---|---------------|---------------|---------------|
| H | -0.0409511609 | -0.938948172  | -2.8513167791 |
| C | 0.2562203684  | -0.1908556416 | -2.1224812613 |
| H | -0.1848792845 | 0.7851161785  | -2.2836805856 |
| C | 1.4393507576  | -0.3544875275 | -1.4243533749 |
| C | 1.8284668848  | 0.5052970449  | -0.3721056907 |
| C | 1.0277045103  | 1.6148211629  | -0.1201154799 |
| H | 1.2322811037  | 2.2621226605  | 0.7274854647  |
| H | 0.5308728879  | 2.1168253421  | -0.9406068302 |

|   |               |               |               |
|---|---------------|---------------|---------------|
| C | -1.0285708322 | 0.833317864   | 0.3596998348  |
| H | -0.6927431767 | 0.7341567389  | 1.3897648737  |
| C | -1.8528185303 | 2.0643027384  | 0.0555099527  |
| C | -1.222752036  | -0.3467003698 | -0.3553685047 |
| H | -2.0010470288 | -0.3668197392 | -1.1162357292 |
| C | -0.8234973384 | -1.6625092625 | 0.2673701802  |
| H | 1.9594940481  | -1.29815885   | -1.5496092022 |
| H | -1.3867606928 | -1.8008785697 | 1.2037588062  |
| H | 0.2293512943  | -1.582375534  | 0.5669468005  |
| C | -1.0272584953 | -2.8968897186 | -0.6149862957 |
| H | -2.0770258824 | -2.935780664  | -0.9362132342 |
| C | -0.6593235029 | -4.2198095138 | 0.0735682627  |
| H | -0.4301259809 | -2.7915482389 | -1.5286072173 |
| H | -0.9359628076 | -5.0512208008 | -0.5870599529 |
| H | -1.2642639698 | -4.3387122567 | 0.9829961644  |
| C | 0.8275204446  | -4.3393605344 | 0.4306714531  |
| H | 1.1287630023  | -3.59305165   | 1.1727219442  |
| H | 1.455670461   | -4.1939524489 | -0.4563412662 |
| H | 1.0591880541  | -5.3257568575 | 0.8454300254  |
| C | -3.2557543961 | 2.0030938476  | 0.6889604609  |
| H | -1.9441710543 | 2.1738412991  | -1.033225049  |
| H | -1.3429013065 | 2.9677942988  | 0.414961766   |
| H | -3.7897947138 | 1.1318185191  | 0.2863426904  |
| C | -4.0992644238 | 3.2693683823  | 0.4757543022  |
| H | -3.1449145505 | 1.8207355085  | 1.7661080893  |
| C | -4.4533098168 | 3.5444247195  | -0.990293548  |
| H | -3.5640056709 | 4.1340524191  | 0.8918817661  |
| H | -5.0258574807 | 3.1769904852  | 1.0565896889  |
| H | -5.10983726   | 4.4156930343  | -1.0827443313 |
| H | -4.9719282437 | 2.6869335159  | -1.4350432315 |
| H | -3.5617464903 | 3.7406828698  | -1.5944312952 |
| C | 2.9744074244  | 0.1503712202  | 0.5985875842  |
| C | 2.4360277481  | 0.0444670495  | 2.0440146586  |
| H | 1.69108843    | -0.7531432239 | 2.1281061791  |
| H | 3.2531403731  | -0.1807330707 | 2.7387955533  |
| H | 1.968326567   | 0.9753147517  | 2.3773018243  |
| C | 3.6566518885  | -1.1848781185 | 0.2479602215  |
| H | 4.4776645351  | -1.3751874837 | 0.946956829   |

|   |              |               |               |
|---|--------------|---------------|---------------|
| H | 2.9616489862 | -2.0279490934 | 0.3166397117  |
| H | 4.0795473093 | -1.1705034925 | -0.7618120155 |
| C | 4.0430548691 | 1.2668205026  | 0.5385777833  |
| H | 4.4491339286 | 1.3605723918  | -0.4739950033 |
| H | 3.6218611813 | 2.2366862718  | 0.8195645707  |
| H | 4.8727673911 | 1.0476633839  | 1.2208377918  |
| H | 4.8727673911 | 1.0476633839  | 1.2208377918  |

TS exo 0247

E(RB3LYP) = -706.413961981 A.U.

First frequency = -487.1834 cm<sup>-1</sup>

|   |               |               |               |
|---|---------------|---------------|---------------|
| H | 0.5559117493  | -1.8196231834 | -2.3923255727 |
| C | 0.7626066222  | -0.8379095421 | -1.9766615235 |
| H | 0.3195422773  | -0.0193208112 | -2.5307002618 |
| C | 1.8737981287  | -0.6605378309 | -1.1719561528 |
| C | 2.1405167308  | 0.5519749188  | -0.4952739342 |
| C | 1.2967060841  | 1.6277828253  | -0.7456454784 |
| H | 1.4029007013  | 2.5548468123  | -0.190431746  |
| H | 0.8594359658  | 1.7553978869  | -1.7274374292 |
| C | -0.7819672828 | 0.9458439964  | -0.159285997  |
| H | -0.5221030823 | 1.2299671877  | 0.8569406887  |
| C | -1.5944154679 | 1.9510775844  | -0.9483561814 |
| C | -0.8884886422 | -0.4167853731 | -0.4257979454 |
| H | -1.5856186495 | -0.7258991203 | -1.2006834834 |
| C | -0.5574023653 | -1.4138160443 | 0.6620077204  |
| H | 2.4248193444  | -1.5510864288 | -0.8890682856 |
| H | -1.2462340617 | -1.251582844  | 1.5059051834  |
| H | 0.4422524012  | -1.171205004  | 1.047375153   |
| C | -0.6050819179 | -2.8969086632 | 0.2745790064  |
| H | 0.1329885504  | -3.0961610598 | -0.5115488347 |
| C | -1.9826849631 | -3.3888365185 | -0.1871979055 |
| H | -0.2930856844 | -3.4928094203 | 1.142995524   |
| H | -2.2953125584 | -2.8363045804 | -1.0821077523 |
| H | -2.7266081352 | -3.1580630367 | 0.587758004   |
| C | -2.0018299223 | -4.8896575736 | -0.4915516435 |
| H | -1.7299499911 | -5.4749974405 | 0.394361604   |
| H | -1.2850440853 | -5.139087106  | -1.2824930939 |

|   |               |               |               |
|---|---------------|---------------|---------------|
| H | -2.9913981348 | -5.2226304726 | -0.8212117125 |
| C | -3.0842271521 | 1.9845303306  | -0.5515099565 |
| H | -1.5223176001 | 1.7111195434  | -2.0184082514 |
| H | -1.1715665046 | 2.9568081269  | -0.8289151421 |
| H | -3.6144827363 | 2.6820225838  | -1.2151226625 |
| C | -3.3318188005 | 2.392614642   | 0.9052984844  |
| H | -3.5227768076 | 0.9930438063  | -0.7277444641 |
| C | -4.8205825196 | 2.4628918622  | 1.2563329847  |
| H | -2.8608229359 | 3.367846347   | 1.0921602395  |
| H | -2.832210905  | 1.6791892675  | 1.5724129691  |
| H | -4.9754608276 | 2.7532155405  | 2.3006567733  |
| H | -5.3058479207 | 1.4918463302  | 1.1045576109  |
| H | -5.3413856125 | 3.1927897948  | 0.6258642156  |
| C | 3.1940241891  | 0.6529576406  | 0.6278026866  |
| C | 4.2388566478  | 1.7245839307  | 0.2380296937  |
| H | 4.7402296006  | 1.4550427585  | -0.6973702433 |
| H | 3.7711824926  | 2.7032342599  | 0.0950714438  |
| H | 5.0021180918  | 1.8249801361  | 1.0185709957  |
| C | 2.5183308194  | 1.0651737988  | 1.9558852716  |
| H | 3.2671357392  | 1.1598265638  | 2.7505550435  |
| H | 2.003340313   | 2.0265266173  | 1.8735495867  |
| H | 1.7835146191  | 0.3173138701  | 2.2705759856  |
| C | 3.9364668102  | -0.6746956168 | 0.8659165918  |
| H | 4.4548582003  | -1.0166517255 | -0.0357245593 |
| H | 4.6893732817  | -0.5421621493 | 1.6497468158  |
| H | 3.2557426454  | -1.4680555352 | 1.1919020242  |
| H | 3.2557426454  | -1.4680555352 | 1.1919020242  |

TS exo 0248

E(RB3LYP) = -706.413185156 A.U.

First frequency = -492.4305 cm<sup>-1</sup>

|   |              |               |               |
|---|--------------|---------------|---------------|
| H | 1.1682127153 | -0.9702019811 | -3.2084956126 |
| C | 1.0552424274 | -0.2173734312 | -2.4327180803 |
| H | 0.3394849803 | 0.5615423186  | -2.6707398817 |
| C | 2.0993690891 | 0.0005200896  | -1.5485361623 |
| C | 1.9786285277 | 0.852271576   | -0.4270763909 |
| C | 0.8048393602 | 1.577561041   | -0.2822401676 |

|   |               |               |               |
|---|---------------|---------------|---------------|
| H | 0.6375345693  | 2.1759952439  | 0.6066435322  |
| H | 0.2534078888  | 1.9112467491  | -1.1514564542 |
| C | -0.9003525407 | -0.0120065791 | -0.2220208977 |
| H | -0.674039625  | -0.0940096314 | 0.838138705   |
| C | -2.0893433104 | 0.853168971   | -0.5902999331 |
| C | -0.4978654931 | -1.0540736495 | -1.0532065018 |
| H | -1.1021742155 | -1.2416079535 | -1.9387898588 |
| C | 0.2439858663  | -2.2408706727 | -0.4767837202 |
| H | 2.9402432363  | -0.6823212965 | -1.599046184  |
| H | 1.0980001435  | -1.8679200695 | 0.1018076896  |
| H | 0.6637037793  | -2.8493143027 | -1.2874598816 |
| C | -0.6231827483 | -3.1334587599 | 0.4320404511  |
| H | 0.0081279311  | -3.9238707029 | 0.8621146231  |
| C | -1.8161215388 | -3.7772564961 | -0.2835536854 |
| H | -0.9906877581 | -2.5369593542 | 1.2780650511  |
| H | -1.4521513057 | -4.3493627996 | -1.1484738078 |
| H | -2.4623636778 | -2.9887327313 | -0.6897631271 |
| C | -2.636631211  | -4.6907336602 | 0.6310913842  |
| H | -3.0350687131 | -4.1337150559 | 1.4869802888  |
| H | -2.0222678105 | -5.5072166064 | 1.0279105602  |
| H | -3.4839062474 | -5.1380466471 | 0.1009307578  |
| C | -2.4255659032 | 1.9580820165  | 0.4167536465  |
| H | -2.9738059737 | 0.2069425268  | -0.6996569368 |
| H | -1.9331601837 | 1.2962923326  | -1.5859615188 |
| H | -2.5379476805 | 1.5107918936  | 1.4147899849  |
| C | -3.7015084761 | 2.7288701149  | 0.06131312    |
| H | -1.590274631  | 2.6639310698  | 0.492830846   |
| C | -4.0319859125 | 3.8330315161  | 1.0694373988  |
| H | -4.5433441497 | 2.0262574129  | -0.005415892  |
| H | -3.5913258538 | 3.1660795548  | -0.9406054032 |
| H | -4.9463865419 | 4.3689555421  | 0.7951398749  |
| H | -3.2201751737 | 4.5669654492  | 1.1298648204  |
| H | -4.1762656885 | 3.4185909263  | 2.0738023364  |
| C | 3.0110533123  | 0.8451673723  | 0.721292105   |
| C | 3.5663764679  | 2.2759875335  | 0.9097008691  |
| H | 2.7698288432  | 2.9858561227  | 1.1510421957  |
| H | 4.3003969529  | 2.3029277258  | 1.7234841005  |
| H | 4.0575247454  | 2.6247174847  | -0.0047309319 |

|   |              |               |               |
|---|--------------|---------------|---------------|
| C | 2.3348146357 | 0.3860492859  | 2.0337978781  |
| H | 3.0565712684 | 0.395436371   | 2.8585807904  |
| H | 1.5030168248 | 1.0378340986  | 2.3157902223  |
| H | 1.944174551  | -0.6321771564 | 1.937358269   |
| C | 4.1992326523 | -0.0944996893 | 0.4454740752  |
| H | 4.7277509059 | 0.1800244091  | -0.4732249027 |
| H | 4.9165343295 | -0.0353196221 | 1.2705748076  |
| H | 3.8810145082 | -1.1385858658 | 0.3593992746  |
| H | 3.8810145082 | -1.1385858658 | 0.3593992746  |

TS exo 0249

E(RB3LYP) = -706.413374163 A.U.

First frequency = -514.2085 cm<sup>-1</sup>

|   |               |               |               |
|---|---------------|---------------|---------------|
| H | 1.0426433357  | -0.5553038899 | -3.3261815709 |
| C | 0.9289482948  | 0.0855496132  | -2.4553406639 |
| H | 0.3530285666  | 0.9856117446  | -2.644339526  |
| C | 1.9059872319  | 0.0567311359  | -1.4698032095 |
| C | 1.7708483854  | 0.7499879321  | -0.2457153288 |
| C | 0.6632837123  | 1.5681506167  | -0.082148929  |
| H | 0.4623124589  | 2.0538116108  | 0.8636588668  |
| H | 0.2284052533  | 2.0683813654  | -0.9375575927 |
| C | -1.1934217723 | 0.1919061053  | -0.4454671491 |
| H | -1.0895622998 | -0.098285582  | 0.5970972855  |
| C | -2.2454253539 | 1.238724931   | -0.7505431712 |
| C | -0.810321402  | -0.7336494713 | -1.4179365404 |
| H | -1.3564719208 | -0.7038849706 | -2.3608856749 |
| C | -0.2927194901 | -2.0915343874 | -0.9977147179 |
| H | 2.6752230418  | -0.7075709464 | -1.5482326631 |
| H | 0.4733768438  | -1.9410183777 | -0.2314947774 |
| H | 0.2074423087  | -2.5870233438 | -1.8395177226 |
| C | -1.3960006263 | -3.0157401716 | -0.4524334715 |
| H | -1.8816827069 | -2.5275256932 | 0.4034625802  |
| C | -0.8894807527 | -4.4033038257 | -0.0288988946 |
| H | -2.1749915706 | -3.1318240557 | -1.2178544743 |
| H | -0.4075014947 | -4.8903224224 | -0.8879126381 |
| H | -1.7514371923 | -5.0305775176 | 0.2322176177  |
| C | 0.0850647442  | -4.3744594499 | 1.1549453249  |

|   |               |               |               |
|---|---------------|---------------|---------------|
| H | -0.3662463803 | -3.8743371376 | 2.020226968   |
| H | 1.0080206983  | -3.8391505206 | 0.9110386515  |
| H | 0.3640861048  | -5.3871291472 | 1.4639977007  |
| C | -2.5698859949 | 2.1921678469  | 0.4044501306  |
| H | -3.1748113589 | 0.7277481589  | -1.046007355  |
| H | -1.9452637455 | 1.8205970883  | -1.6359798041 |
| H | -2.8259629911 | 1.6011987478  | 1.2954955142  |
| C | -3.7208944021 | 3.1526741319  | 0.0865404323  |
| H | -1.6807947956 | 2.774885883   | 0.6718883276  |
| C | -4.0397923177 | 4.1052436964  | 1.2422774492  |
| H | -4.6173737064 | 2.5724477231  | -0.1712903215 |
| H | -3.4677367553 | 3.7342381622  | -0.8105877666 |
| H | -3.1692693672 | 4.7205505037  | 1.4971108956  |
| H | -4.3249030474 | 3.5496198915  | 2.1430226612  |
| H | -4.8641324878 | 4.7809197015  | 0.9922016851  |
| C | 2.7451274385  | 0.4302110453  | 0.9079274858  |
| C | 4.1846214658  | 0.7424092583  | 0.4375028841  |
| H | 4.9032342585  | 0.5309726593  | 1.2377251941  |
| H | 4.4678537502  | 0.141699077   | -0.4315843927 |
| H | 4.2818057327  | 1.7969853709  | 0.160107055   |
| C | 2.4602941157  | 1.2744266381  | 2.1636858435  |
| H | 1.4705328587  | 1.0606278635  | 2.5804549383  |
| H | 3.1987936852  | 1.0474765392  | 2.9396495428  |
| H | 2.5172729796  | 2.3464463229  | 1.9497272276  |
| C | 2.6537598939  | -1.0607457147 | 1.3087770406  |
| H | 3.3697716938  | -1.2889146185 | 2.1067710348  |
| H | 1.6517883874  | -1.3044306908 | 1.6768205947  |
| H | 2.8723827894  | -1.7232345332 | 0.4663706399  |
| H | 2.8723827894  | -1.7232345332 | 0.4663706399  |

TS exo 0255

E(RB3LYP) = -706.415120342 A.U.

First frequency = -496.1586 cm<sup>-1</sup>

|   |               |               |               |
|---|---------------|---------------|---------------|
| H | -0.0978093526 | -0.8145288254 | -2.8379334493 |
| C | 0.2933545944  | -0.0734999144 | -2.1471918242 |
| H | -0.0092058918 | 0.942322489   | -2.3696043918 |
| C | 1.442023542   | -0.3553699246 | -1.4279685299 |

|   |               |               |               |
|---|---------------|---------------|---------------|
| C | 1.9368999181  | 0.500406123   | -0.418609525  |
| C | 1.2869717111  | 1.7173729718  | -0.2359699639 |
| H | 1.569354814   | 2.3776545859  | 0.5786605549  |
| H | 0.8675671697  | 2.2349378518  | -1.0893474393 |
| C | -0.8534160467 | 1.2460205697  | 0.2621580553  |
| H | -0.536290787  | 1.1496945606  | 1.2989831271  |
| C | -1.5075057698 | 2.564438353   | -0.0900145142 |
| C | -1.1936649007 | 0.0648044473  | -0.3981553658 |
| H | -1.9626367541 | 0.1031436131  | -1.1659863126 |
| C | -0.9754254852 | -1.2562205637 | 0.2998165386  |
| H | 1.8304873912  | -1.3659804213 | -1.4956801841 |
| H | -1.5507607675 | -1.264182712  | 1.2390473429  |
| H | 0.0788084423  | -1.3036003565 | 0.6011699539  |
| C | -1.3482565624 | -2.4980295765 | -0.5140258327 |
| H | -2.3938717001 | -2.4094705951 | -0.8389719011 |
| C | -1.1652721558 | -3.8183709099 | 0.2493033784  |
| H | -0.7437603361 | -2.5273091498 | -1.4284905934 |
| H | -1.5537197987 | -4.6395369364 | -0.3662971704 |
| H | -1.7805595576 | -3.8021725193 | 1.1594211584  |
| C | 0.2911680325  | -4.120474208  | 0.6234691866  |
| H | 0.6920842699  | -3.3823388394 | 1.3254530676  |
| H | 0.9331222482  | -4.1121322042 | -0.2655302251 |
| H | 0.3853507371  | -5.1046642701 | 1.0937359565  |
| C | -2.811897173  | 2.8293374018  | 0.6956726844  |
| H | -1.7074582358 | 2.5960394759  | -1.1691337985 |
| H | -0.8219483087 | 3.3957273048  | 0.1152033061  |
| H | -2.5753482993 | 2.8174926158  | 1.7681339795  |
| C | -3.9631217711 | 1.8481950996  | 0.4284288047  |
| H | -3.1527181094 | 3.8491658038  | 0.4684776764  |
| C | -4.5003158411 | 1.8935455459  | -1.0060555041 |
| H | -4.7814982938 | 2.0764058471  | 1.1230527947  |
| H | -3.6347075481 | 0.8291536875  | 0.665359878   |
| H | -4.8315881049 | 2.9046634801  | -1.2704751624 |
| H | -5.353797946  | 1.2192036293  | -1.1307871202 |
| H | -3.7400832369 | 1.5971061692  | -1.7359773754 |
| C | 3.0203396143  | 0.0507698882  | 0.5837364998  |
| C | 2.4644522677  | 0.0939556986  | 2.0257964282  |
| H | 3.2413240448  | -0.1974901909 | 2.7417786191  |



|   |              |               |               |
|---|--------------|---------------|---------------|
| H | 2.1200863363 | 1.0942651595  | 2.3034448248  |
| H | 1.6215322551 | -0.594566112  | 2.1425775509  |
| C | 3.5227424513 | -1.3791620114 | 0.3118825455  |
| H | 4.3079115038 | -1.6379077642 | 1.0298104439  |
| H | 2.7224624704 | -2.1189052837 | 0.4161466975  |
| H | 3.9489777009 | -1.4744335804 | -0.692084232  |
| C | 4.2269368181 | 1.0126861877  | 0.4789910894  |
| H | 4.6474493743 | 0.9982926916  | -0.5319250838 |
| H | 3.9354881761 | 2.0429960678  | 0.7037983567  |
| H | 5.0167456594 | 0.7232849994  | 1.1820856006  |
| H | 5.0167456594 | 0.7232849994  | 1.1820856006  |

TS exo 0260

E(RB3LYP) = -706.413261578 A.U.

First frequency = -501.9942  $\text{cm}^{-1}$

|   |               |               |               |
|---|---------------|---------------|---------------|
| H | 0.1893277197  | 0.1197804368  | -3.1123064428 |
| C | 0.3599077387  | 0.6104035903  | -2.1577465661 |
| H | -0.2746930826 | 1.468145707   | -1.9773992424 |
| C | 1.5880516099  | 0.4669876024  | -1.53439349   |
| C | 1.837983327   | 0.9342088846  | -0.2244062539 |
| C | 0.8233898713  | 1.6333144183  | 0.4174261155  |
| H | 0.9274555393  | 1.9286754546  | 1.4570287332  |
| H | 0.1525844302  | 2.2632146791  | -0.1517736746 |
| C | -0.9429958456 | 0.2117998164  | 0.5128593851  |
| H | -0.4331092326 | -0.2708431085 | 1.3434584338  |
| C | -2.0228545697 | 1.1919324356  | 0.9379305839  |
| C | -0.9754779112 | -0.5004607069 | -0.6854187414 |
| H | -1.8044873124 | -0.3280924446 | -1.3668997488 |
| C | -0.3300152259 | -1.8663066299 | -0.7571940749 |
| H | 2.2902130121  | -0.2276699876 | -1.9824797678 |
| H | 0.6776701226  | -1.8026565175 | -0.3254648831 |
| H | -0.1954685118 | -2.170306575  | -1.8024253991 |
| C | -1.1251455023 | -2.9522792753 | -0.0119425981 |
| H | -1.2526250546 | -2.6507321291 | 1.0365533471  |
| C | -0.457712784  | -4.330875538  | -0.0707434441 |
| H | -2.1385204149 | -3.0174937823 | -0.4326889562 |
| H | 0.5557243746  | -4.2573538884 | 0.3475869417  |

|   |               |               |               |
|---|---------------|---------------|---------------|
| H | -0.3307433613 | -4.6275074264 | -1.1209070133 |
| C | -1.2457185072 | -5.4101796171 | 0.6768956111  |
| H | -2.2518492388 | -5.524485722  | 0.2573977371  |
| H | -1.358641561  | -5.1520848923 | 1.7361360374  |
| H | -0.7486873106 | -6.3843189062 | 0.6219367603  |
| C | -2.7025120982 | 1.9879674888  | -0.1831657584 |
| H | -1.6087270146 | 1.8986970358  | 1.6691956482  |
| H | -2.7982793124 | 0.6314718514  | 1.4836816654  |
| H | -1.9497624227 | 2.5393285178  | -0.7624246498 |
| C | -3.7481543119 | 2.9777727074  | 0.3431872478  |
| H | -3.1865154765 | 1.3021035357  | -0.8901696259 |
| C | -4.4373947836 | 3.767260503   | -0.7731084578 |
| H | -3.2668279871 | 3.6733871082  | 1.0439282932  |
| H | -4.5006168627 | 2.4306716121  | 0.9273426913  |
| H | -5.1779881575 | 4.4672927524  | -0.3731029191 |
| H | -4.9537761891 | 3.0964105501  | -1.4692275829 |
| H | -3.7096316838 | 4.3464647734  | -1.3529776559 |
| C | 3.0861259008  | 0.5022232549  | 0.5742397999  |
| C | 4.0619266936  | -0.3453453655 | -0.2625629294 |
| H | 3.612256659   | -1.292627035  | -0.5773433607 |
| H | 4.3969038523  | 0.189470337   | -1.1572567313 |
| H | 4.9489031366  | -0.5840928087 | 0.3333498425  |
| C | 3.8402801552  | 1.7637669025  | 1.0547361173  |
| H | 4.1605022873  | 2.3718802327  | 0.2022934219  |
| H | 3.2087558121  | 2.3899752548  | 1.6916623919  |
| H | 4.7308681581  | 1.4870191344  | 1.6309686385  |
| C | 2.6604164589  | -0.3339618156 | 1.803260817   |
| H | 2.1357063205  | -1.2439573337 | 1.4941345358  |
| H | 3.5394529668  | -0.6312583199 | 2.3865736283  |
| H | 1.9966236497  | 0.2255923224  | 2.4686902149  |
| H | 1.9966236497  | 0.2255923224  | 2.4686902149  |

TS exo 0271

E(RB3LYP) = -706.412942282 A.U.

First frequency = -517.2340  $\text{cm}^{-1}$

|   |              |               |               |
|---|--------------|---------------|---------------|
| H | 1.6989116416 | -0.5965571443 | -3.3028814612 |
| C | 1.4541782034 | 0.1022458055  | -2.5067277163 |

|   |               |               |               |
|---|---------------|---------------|---------------|
| H | 0.8550231978  | 0.9462176882  | -2.833405045  |
| C | 2.3214817514  | 0.2193994433  | -1.4280775951 |
| C | 2.0170119687  | 1.0020370943  | -0.2921810989 |
| C | 0.8506406644  | 1.7516658854  | -0.3163296805 |
| H | 0.5202590187  | 2.3018184101  | 0.5551640207  |
| H | 0.4807056187  | 2.146213698   | -1.2532165225 |
| C | -0.8483598711 | 0.2057318161  | -0.7264561428 |
| H | -0.7942986964 | -0.0081717661 | 0.3354353378  |
| C | -1.9401070534 | 1.1577207182  | -1.1781064011 |
| C | -0.3284943852 | -0.7527761774 | -1.6003910532 |
| H | -0.7907940389 | -0.8070653669 | -2.5870876334 |
| C | 0.2000717987  | -2.0710048573 | -1.0719904667 |
| H | 3.1359749301  | -0.4973617192 | -1.3593608705 |
| H | 0.759490402   | -1.8835556424 | -0.1480092068 |
| H | 0.917395362   | -2.4989323181 | -1.7818226654 |
| C | -0.8977816283 | -3.1206870707 | -0.8000250104 |
| H | -1.4611039008 | -3.3027835596 | -1.726607572  |
| C | -1.880298657  | -2.7663419059 | 0.3224702355  |
| H | -0.408190044  | -4.0732278484 | -0.5526698199 |
| H | -2.4239139823 | -1.8515871292 | 0.0611843421  |
| H | -1.3147133375 | -2.5325138275 | 1.2356105023  |
| C | -2.8795870625 | -3.8908210119 | 0.6093809647  |
| H | -2.3663060339 | -4.8102346293 | 0.9138887565  |
| H | -3.4729837238 | -4.1258213153 | -0.2818879085 |
| H | -3.5752896248 | -3.6161562378 | 1.4091167685  |
| C | -2.5486026798 | 2.0159720774  | -0.0596695138 |
| H | -2.7504061701 | 0.5790047348  | -1.6467577144 |
| H | -1.5566807333 | 1.8107397386  | -1.9761403154 |
| H | -1.7562660521 | 2.5790036852  | 0.4492332552  |
| C | -3.3411635475 | 1.2072401473  | 0.9763963752  |
| H | -3.2160087164 | 2.7645830786  | -0.5065450838 |
| C | -3.94625368   | 2.0840278348  | 2.0762348807  |
| H | -2.6941570092 | 0.4474512312  | 1.4322693019  |
| H | -4.1391690602 | 0.6535747456  | 0.4625413324  |
| H | -4.6260072275 | 2.8333213355  | 1.6544539652  |
| H | -3.1643057722 | 2.6215585223  | 2.6249626812  |
| H | -4.5126331004 | 1.4891826242  | 2.8001281026  |
| C | 2.8671340606  | 0.8317882235  | 0.9840808826  |

|   |              |               |               |
|---|--------------|---------------|---------------|
| C | 2.7703440542 | -0.6196792892 | 1.5085215046  |
| H | 3.393427431  | -0.7494123139 | 2.4010868085  |
| H | 1.7381334224 | -0.8653636379 | 1.7797488122  |
| H | 3.1023329084 | -1.3450838155 | 0.7605624458  |
| C | 4.3410026581 | 1.1559889843  | 0.6487557821  |
| H | 4.9690008747 | 1.0457687713  | 1.5402948474  |
| H | 4.7396458201 | 0.4909458809  | -0.1226038669 |
| H | 4.4393169461 | 2.1842615599  | 0.2860736864  |
| C | 2.4173412793 | 1.7752581248  | 2.1148974467  |
| H | 3.0749019116 | 1.6562035848  | 2.9823467185  |
| H | 2.4578119524 | 2.8240569486  | 1.8039134177  |
| H | 1.3967546437 | 1.5555997091  | 2.4452938094  |
| H | 1.3967546437 | 1.5555997091  | 2.4452938094  |

TS exo 0276

E(RB3LYP) = -706.411845703 A.U.

First frequency = -511.4884 cm<sup>-1</sup>

|   |               |               |               |
|---|---------------|---------------|---------------|
| H | 1.121683419   | -0.9552136232 | -3.0130716629 |
| C | 1.0925299691  | -0.1597976059 | -2.2729881018 |
| H | 0.4376682841  | 0.6640161931  | -2.5331960607 |
| C | 2.1832387346  | 0.0269242629  | -1.4380843606 |
| C | 2.1670055004  | 0.9319467451  | -0.353131712  |
| C | 1.0283357907  | 1.7107242515  | -0.1862867796 |
| H | 0.9110823206  | 2.3601608707  | 0.6730220466  |
| H | 0.476345138   | 2.0390453671  | -1.0577995934 |
| C | -0.6998058177 | 0.2783402846  | 0.0396498002  |
| H | -0.4182855465 | 0.1383328358  | 1.0813578499  |
| C | -1.8238370222 | 1.2627477737  | -0.2025824017 |
| C | -0.4891412038 | -0.8002440912 | -0.8244113386 |
| H | -1.161367881  | -0.8876595405 | -1.6747047438 |
| C | 0.1412643118  | -2.0753739893 | -0.3023234986 |
| H | 2.9790003756  | -0.7129375186 | -1.4796971424 |
| H | 1.0506461699  | -1.7867250988 | 0.2360781665  |
| H | 0.4723583741  | -2.7049359426 | -1.1377249969 |
| C | -0.7273608635 | -2.9266614691 | 0.6537222597  |
| H | -0.0497105865 | -3.5606117752 | 1.241143154   |
| C | -1.7626241077 | -3.8468153392 | -0.0137650398 |

|   |               |               |               |
|---|---------------|---------------|---------------|
| H | -1.229780384  | -2.2662453212 | 1.373130395   |
| H | -2.1445949251 | -4.541827721  | 0.7456812866  |
| H | -1.2520799259 | -4.4697681193 | -0.7614575329 |
| C | -2.9546116495 | -3.1399601328 | -0.6670467414 |
| H | -2.646250321  | -2.5034304423 | -1.5009150187 |
| H | -3.476078511  | -2.5047403142 | 0.0570742556  |
| H | -3.676800482  | -3.8660794662 | -1.0556630955 |
| C | -3.1937939513 | 0.7245806357  | 0.2499950565  |
| H | -1.876173504  | 1.5013423236  | -1.2751644122 |
| H | -1.6136364406 | 2.2069104065  | 0.3121175845  |
| H | -3.3941122269 | -0.2074865757 | -0.2899894162 |
| C | -4.3598519219 | 1.7008043274  | 0.0292000503  |
| H | -3.14004426   | 0.4554413642  | 1.3146263589  |
| C | -4.2889634229 | 2.9710945749  | 0.8846637886  |
| H | -5.3002271081 | 1.1776606366  | 0.2449895583  |
| H | -4.4024876364 | 1.9761676109  | -1.0337593614 |
| H | -3.4118117859 | 3.5789858105  | 0.6410789291  |
| H | -4.2326798215 | 2.7217182575  | 1.950785358   |
| H | -5.1735878881 | 3.5987789653  | 0.7355040965  |
| C | 3.2954251525  | 0.8688151595  | 0.6963846957  |
| C | 3.3421983385  | -0.5227042808 | 1.3696889565  |
| H | 4.1593707324  | -0.5701952877 | 2.0988860229  |
| H | 2.4059620907  | -0.729606172  | 1.898603128   |
| H | 3.5001191728  | -1.3221471372 | 0.6403447981  |
| C | 4.6436743061  | 1.1360826187  | -0.011891823  |
| H | 4.848758207   | 0.3941349565  | -0.788958397  |
| H | 4.6446249305  | 2.1234075968  | -0.4848713335 |
| H | 5.4684352286  | 1.1008030269  | 0.7092169069  |
| C | 3.1207247934  | 1.9245987428  | 1.8034907159  |
| H | 3.9652332095  | 1.8777545417  | 2.4989385917  |
| H | 3.0814340215  | 2.9378051195  | 1.3909810943  |
| H | 2.2081144238  | 1.7562152234  | 2.3847151237  |
| H | 2.2081144238  | 1.7562152234  | 2.3847151237  |

TS exo 0277

E(RB3LYP) = -706.412008818 A.U.

First frequency = -509.9462  $\text{cm}^{-1}$

|   |               |               |               |
|---|---------------|---------------|---------------|
| H | 1.0017096377  | -1.2289122024 | -2.9972893441 |
| C | 1.0861358659  | -0.3455208332 | -2.3695502307 |
| H | 0.729191569   | 0.5647394975  | -2.8389133572 |
| C | 2.0653504902  | -0.3082486061 | -1.3874898298 |
| C | 2.1505345338  | 0.7336921978  | -0.4366639015 |
| C | 1.2644389115  | 1.7940519849  | -0.565356823  |
| H | 1.2084957162  | 2.5786125412  | 0.1796416817  |
| H | 0.9374449707  | 2.1018497094  | -1.5500042708 |
| C | -0.8230828912 | 0.8620480204  | -0.4856162314 |
| H | -0.7060728593 | 0.828528437   | 0.5926047495  |
| C | -1.5881361989 | 2.0356600662  | -1.0625995767 |
| C | -0.7725421093 | -0.3540209139 | -1.1723070983 |
| H | -1.3426787669 | -0.4146080057 | -2.0994747961 |
| C | -0.6094011719 | -1.6557460111 | -0.4179470372 |
| H | 2.623691377   | -1.2225677699 | -1.2018723005 |
| H | 0.2142664849  | -1.5489191752 | 0.2979896896  |
| H | -0.313163584  | -2.4505478444 | -1.1107993734 |
| C | -1.8792374468 | -2.0734066186 | 0.3452736923  |
| H | -2.1610173317 | -1.2588627466 | 1.0225326826  |
| C | -1.7246587961 | -3.370897258  | 1.1540686462  |
| H | -2.7122523349 | -2.1817573056 | -0.3642764951 |
| H | -2.6247825294 | -3.5141509663 | 1.765629588   |
| H | -0.8913558181 | -3.2550191295 | 1.8610353422  |
| C | -1.4984315282 | -4.6231284106 | 0.2990559372  |
| H | -0.5588820129 | -4.5700917038 | -0.260045352  |
| H | -2.3089831921 | -4.7519945121 | -0.4279252848 |
| H | -1.4603887568 | -5.5248358557 | 0.919067229   |
| C | -3.1296496002 | 1.959846088   | -0.9415947769 |
| H | -1.3401462626 | 2.103305181   | -2.1313366702 |
| H | -1.2463314748 | 2.9772158584  | -0.6138680972 |
| H | -3.5572339885 | 2.617152914   | -1.7103528116 |
| C | -3.7220131329 | 2.3835444018  | 0.4124420842  |
| H | -3.4592532297 | 0.9419454375  | -1.1882866677 |
| C | -3.4385423971 | 1.4427156532  | 1.5882764511  |
| H | -4.8098067173 | 2.4741206019  | 0.2940981436  |
| H | -3.3615328161 | 3.3925962219  | 0.656592046   |
| H | -2.3739648811 | 1.4038311969  | 1.8344413156  |
| H | -3.7617721281 | 0.4215399268  | 1.3592153127  |

|   |               |               |               |
|---|---------------|---------------|---------------|
| H | -3.9722074496 | 1.7687984045  | 2.4874696835  |
| C | 3.0526748509  | 0.5482062781  | 0.8006886346  |
| C | 3.0348484237  | 1.7800998786  | 1.7243636637  |
| H | 2.0403790743  | 1.9558836862  | 2.1476157551  |
| H | 3.724417708   | 1.6277536797  | 2.5612145701  |
| H | 3.345449937   | 2.6856217175  | 1.1934831008  |
| C | 2.5956908537  | -0.6747120348 | 1.6298461692  |
| H | 2.6188907936  | -1.5963133051 | 1.0415756653  |
| H | 3.248576412   | -0.8164837976 | 2.498964711   |
| H | 1.5730169373  | -0.5350802481 | 1.9957723124  |
| C | 4.507207752   | 0.3266884012  | 0.3259595064  |
| H | 4.5982158688  | -0.5604663571 | -0.3072724147 |
| H | 4.8621978862  | 1.1864571994  | -0.2513704783 |
| H | 5.1738759315  | 0.1924122688  | 1.1855815757  |
| H | 5.1738759315  | 0.1924122688  | 1.1855815757  |

TS exo 0284

E(RB3LYP) = -706.414367099 A.U.

First frequency = -511.9637 cm<sup>-1</sup>

|   |               |               |               |
|---|---------------|---------------|---------------|
| H | 0.5342196407  | -1.4128772494 | -2.8469030014 |
| C | 0.6921908278  | -0.5270921644 | -2.2391722994 |
| H | 0.3812818591  | 0.3947119599  | -2.7168075429 |
| C | 1.6782940181  | -0.5376542992 | -1.2665577695 |
| C | 1.867458073   | 0.5296465465  | -0.3589379007 |
| C | 1.0794664631  | 1.6616138791  | -0.5296172055 |
| H | 1.1065917802  | 2.4796870289  | 0.1804116086  |
| H | 0.791460593   | 1.9628013333  | -1.5286546339 |
| C | -1.0698027142 | 0.974403987   | -0.4130668048 |
| H | -0.9807537026 | 1.0379909843  | 0.6684395696  |
| C | -1.7288168912 | 2.1542149726  | -1.0941612852 |
| C | -1.1587886371 | -0.3056182979 | -0.9627086881 |
| H | -1.7384441356 | -0.4222188349 | -1.8777628599 |
| C | -1.0760407551 | -1.5099744426 | -0.0517576676 |
| H | 2.1667401881  | -1.4867710797 | -1.0580397319 |
| H | -1.9071754364 | -1.4623340839 | 0.6698803207  |
| H | -0.1616925446 | -1.4195275615 | 0.5446768792  |
| C | -1.1208721651 | -2.8722979465 | -0.7503003932 |

|   |               |               |               |
|---|---------------|---------------|---------------|
| H | -2.008644018  | -2.9118264052 | -1.3962956821 |
| C | -1.1471246282 | -4.0650860393 | 0.2173166536  |
| H | -0.2536306351 | -2.9719924664 | -1.4137504632 |
| H | -1.2943475209 | -4.9862685563 | -0.3606586474 |
| H | -2.0194570445 | -3.9781055971 | 0.879652366   |
| C | 0.1244703885  | -4.2036795411 | 1.063257023   |
| H | 1.0131515482  | -4.2701328709 | 0.4240216491  |
| H | 0.0927517901  | -5.1049862246 | 1.6840606079  |
| H | 0.2642381211  | -3.3483162207 | 1.7312930238  |
| C | -3.2606212828 | 2.1933414434  | -0.9035788286 |
| H | -1.5155346589 | 2.1162656863  | -2.1714643619 |
| H | -1.2931514529 | 3.0925171434  | -0.7319178855 |
| H | -3.6545531428 | 3.0864913201  | -1.4086917298 |
| C | -3.7263333258 | 2.1954654242  | 0.5610082301  |
| H | -3.6993165324 | 1.3257595582  | -1.4125650652 |
| C | -3.1851758457 | 3.368080238   | 1.3860052314  |
| H | -3.4326029153 | 1.2502053996  | 1.0345396424  |
| H | -4.8232878189 | 2.2162471332  | 0.5782749086  |
| H | -3.4346034184 | 4.3280530788  | 0.9188014813  |
| H | -2.0953031622 | 3.3235019105  | 1.4845948899  |
| H | -3.6060066298 | 3.3693514514  | 2.3966926856  |
| C | 2.7907270845  | 0.3279197652  | 0.8602668544  |
| C | 2.8596766467  | 1.581099744   | 1.7520065281  |
| H | 3.213539756   | 2.4539642111  | 1.1942504021  |
| H | 1.8837163323  | 1.8243283402  | 2.1851602843  |
| H | 3.5534926852  | 1.4096991556  | 2.5816084391  |
| C | 2.3093776488  | -0.8518755712 | 1.7363487943  |
| H | 1.3150442662  | -0.6492981267 | 2.14788418    |
| H | 2.2548111984  | -1.785762694  | 1.1705767029  |
| H | 2.9950444662  | -1.0110610178 | 2.576657197   |
| C | 4.2175592364  | 0.0252145207  | 0.3457006523  |
| H | 4.9059857191  | -0.1175611127 | 1.1866847343  |
| H | 4.2438381054  | -0.8820326948 | -0.2648781939 |
| H | 4.5923869044  | 0.8510491195  | -0.2674514842 |
| H | 4.5923869044  | 0.8510491195  | -0.2674514842 |

TS exo 0285

E(RB3LYP) = -706.413082146 A.U.



First frequency =  $-506.1464 \text{ cm}^{-1}$

|   |               |               |               |
|---|---------------|---------------|---------------|
| H | 0.2643499044  | -1.5470062289 | -2.3818521481 |
| C | 0.4382672062  | -0.616916237  | -1.848870452  |
| H | -0.1555477236 | 0.2147817506  | -2.2093994515 |
| C | 1.6536757143  | -0.4127464569 | -1.2168990055 |
| C | 1.9150728766  | 0.7143170047  | -0.4048228436 |
| C | 0.9269746347  | 1.686285411   | -0.3208838198 |
| H | 1.0194383088  | 2.5286966727  | 0.3542353549  |
| H | 0.2985257847  | 1.8834419675  | -1.1797889461 |
| C | -0.938444817  | 0.6384715592  | 0.4414144667  |
| H | -0.5446409635 | 0.7541948171  | 1.4489779928  |
| C | -1.9651762349 | 1.6661246216  | 0.0189708855  |
| C | -0.9669047437 | -0.6532553964 | -0.0866142358 |
| H | -1.7641719962 | -0.8756472695 | -0.7927644916 |
| C | -0.4481754596 | -1.8081431957 | 0.7447778383  |
| H | 2.3389065123  | -1.2558219505 | -1.1662893914 |
| H | -1.1482945396 | -1.9588247525 | 1.5819590129  |
| H | 0.4991970027  | -1.5009799708 | 1.2026945314  |
| C | -0.2503890036 | -3.1572445828 | 0.0398088997  |
| H | 0.5678918077  | -3.0809316089 | -0.6856802729 |
| C | -1.4992616991 | -3.70114731   | -0.663704384  |
| H | 0.0785155057  | -3.8895729609 | 0.7897737402  |
| H | -1.8003442759 | -3.0147428602 | -1.4649966129 |
| H | -2.3358561267 | -3.7249140587 | 0.0483724657  |
| C | -1.2828074779 | -5.0974498204 | -1.2544417555 |
| H | -1.0172012158 | -5.8192286704 | -0.4735654806 |
| H | -0.4672031905 | -5.0913762647 | -1.9868898811 |
| H | -2.1814256994 | -5.4667150322 | -1.7593595375 |
| C | -3.3202967667 | 1.4702149456  | 0.7252994297  |
| H | -2.1217829796 | 1.6018374811  | -1.0681932649 |
| H | -1.5918096653 | 2.677170472   | 0.2167875682  |
| H | -3.6685370369 | 0.4483307642  | 0.5293148151  |
| C | -4.406107014  | 2.4695517408  | 0.2966877304  |
| H | -3.1709371483 | 1.5380107211  | 1.8122498307  |
| C | -4.1087138575 | 3.9240888048  | 0.6793085097  |
| H | -5.3589132325 | 2.1687314126  | 0.7507950254  |
| H | -4.5514662669 | 2.3989050022  | -0.7902380192 |

|   |               |               |               |
|---|---------------|---------------|---------------|
| H | -3.9430635282 | 4.0185274547  | 1.7589538381  |
| H | -4.9416686798 | 4.5821712845  | 0.4111511398  |
| H | -3.2153956987 | 4.3043714538  | 0.1737320947  |
| C | 3.1733203599  | 0.7213666343  | 0.4870471382  |
| C | 3.1492943328  | -0.4608241753 | 1.4835077423  |
| H | 4.0649881838  | -0.4752402539 | 2.0860715887  |
| H | 2.2984186809  | -0.3740010463 | 2.1671346     |
| H | 3.0720970448  | -1.4238396238 | 0.9709710329  |
| C | 4.4199879793  | 0.5955453608  | -0.4194285021 |
| H | 5.3346970699  | 0.6045677277  | 0.1845070884  |
| H | 4.411372008   | -0.333682544  | -0.996413117  |
| H | 4.4697497364  | 1.4280631391  | -1.1285946436 |
| C | 3.3041447028  | 2.022907591   | 1.2991553482  |
| H | 3.3327633506  | 2.902388257   | 0.6480105444  |
| H | 2.4754960316  | 2.1462488327  | 2.0042658489  |
| H | 4.2308663721  | 2.0063731447  | 1.8822461888  |
| H | 4.2308663721  | 2.0063731447  | 1.8822461888  |

TS exo 0286

E(RB3LYP) = -706.413176221 A.U.

First frequency = -498.3494  $\text{cm}^{-1}$

|   |               |               |               |
|---|---------------|---------------|---------------|
| H | 0.3706338299  | -0.0323082768 | -3.087333283  |
| C | 0.5057855064  | 0.4966230894  | -2.1477555389 |
| H | -0.2165498551 | 1.2823953981  | -1.9696078235 |
| C | 1.75379445    | 0.5033025386  | -1.5487307513 |
| C | 1.976630407   | 1.0252515902  | -0.2544339742 |
| C | 0.9033078649  | 1.6209635331  | 0.3965189382  |
| H | 0.9961850003  | 1.9507505468  | 1.4268013625  |
| H | 0.1546119344  | 2.1593864609  | -0.1696556606 |
| C | -0.6864877673 | 0.0174891104  | 0.5682662151  |
| H | -0.107505515  | -0.3930847008 | 1.392323496   |
| C | -1.8561726489 | 0.8816657873  | 1.0081367696  |
| C | -0.6750004753 | -0.7166846724 | -0.6171373571 |
| H | -1.5292675646 | -0.6336040639 | -1.2822940829 |
| C | 0.10629542    | -2.0120900184 | -0.6844715409 |
| H | 2.5199223186  | -0.1191709213 | -1.9981122304 |
| H | 1.124922269   | -1.8238681355 | -0.3227705822 |

|   |               |               |               |
|---|---------------|---------------|---------------|
| H | 0.2048144202  | -2.3384416272 | -1.7271595186 |
| C | -0.5157495703 | -3.1514287325 | 0.1466593245  |
| H | 0.1455741869  | -4.0283241817 | 0.1015631013  |
| C | -1.921285099  | -3.5578094064 | -0.3105519039 |
| H | -0.5547226347 | -2.8477231263 | 1.2017471361  |
| H | -1.8887681381 | -3.8348759496 | -1.3736142486 |
| H | -2.5883414735 | -2.6889696157 | -0.2423715258 |
| C | -2.5022657948 | -4.714878543  | 0.5066711764  |
| H | -3.5062790584 | -4.987181266  | 0.1647674001  |
| H | -2.5717570121 | -4.4497585771 | 1.5680248718  |
| H | -1.8705363098 | -5.6075649087 | 0.4319571051  |
| C | -2.6614312896 | 1.5588293222  | -0.1076143325 |
| H | -1.5019428949 | 1.653434918   | 1.7042860691  |
| H | -2.5422605658 | 0.2531533702  | 1.5975424227  |
| H | -1.9963868979 | 2.1670598049  | -0.7353366795 |
| C | -3.7886188845 | 2.4472766342  | 0.4309927045  |
| H | -3.0939763469 | 0.7992377782  | -0.7713545418 |
| C | -4.6043990292 | 3.1148591717  | -0.679517043  |
| H | -3.3600505019 | 3.2166377873  | 1.0874766875  |
| H | -4.4522897404 | 1.843085164   | 1.0644472114  |
| H | -5.0703383169 | 2.3662965694  | -1.3305320063 |
| H | -3.9686181316 | 3.748258565   | -1.3087626687 |
| H | -5.4016103095 | 3.7440996672  | -0.2708316774 |
| C | 3.2810603746  | 0.7532593639  | 0.5243337381  |
| C | 4.330995361   | 0.0068499754  | -0.319108287  |
| H | 5.2511357051  | -0.1170012366 | 0.2612544557  |
| H | 3.9874305738  | -0.9918072433 | -0.6076948511 |
| H | 4.5844078668  | 0.5589923928  | -1.229965042  |
| C | 3.8960321005  | 2.1008207225  | 0.968211222   |
| H | 4.129366892   | 2.7252357696  | 0.0994974063  |
| H | 3.2099351403  | 2.6635180733  | 1.607906593   |
| H | 4.8228342635  | 1.9370701596  | 1.5303049607  |
| C | 2.9761581452  | -0.1028189101 | 1.7752908999  |
| H | 3.894107737   | -0.2889802804 | 2.3445378998  |
| H | 2.2665427653  | 0.3910530412  | 2.445443029   |
| H | 2.5508978973  | -1.0710925743 | 1.491624437   |
| H | 2.5508978973  | -1.0710925743 | 1.491624437   |

TS exo 0288

E(RB3LYP) = -706.413496943 A.U.

First frequency = -497.5575 cm<sup>-1</sup>

|   |               |               |               |
|---|---------------|---------------|---------------|
| H | 0.9432489036  | -0.5677918255 | -3.4249788603 |
| C | 0.866852966   | 0.0605353087  | -2.5412666246 |
| H | 0.2813099254  | 0.9614272534  | -2.6875245441 |
| C | 1.8582173635  | -0.0151799627 | -1.5753589456 |
| C | 1.7593976156  | 0.6531962505  | -0.334211013  |
| C | 0.6884902419  | 1.5146231801  | -0.1419754264 |
| H | 0.5277135538  | 1.9818253122  | 0.8235648306  |
| H | 0.2687068202  | 2.0635369675  | -0.9748820645 |
| C | -1.2166677109 | 0.2093900802  | -0.4624671351 |
| H | -1.1025534715 | -0.0463993825 | 0.5877706112  |
| C | -2.2373317504 | 1.280940379   | -0.7876032894 |
| C | -0.8746160717 | -0.7565396583 | -1.4058733656 |
| H | -1.4268091256 | -0.7545016626 | -2.34464306   |
| C | -0.3177424607 | -2.0857070808 | -0.9511701318 |
| H | 2.6016694695  | -0.7959081521 | -1.6919851813 |
| H | 0.5087169955  | -1.8856081431 | -0.2605379237 |
| H | 0.1177502836  | -2.6267229341 | -1.8005992648 |
| C | -1.3588523102 | -2.9836065552 | -0.2590192397 |
| H | -1.7872384858 | -2.4433480655 | 0.5959639703  |
| C | -0.7930397612 | -4.3292089089 | 0.221570978   |
| H | -2.1914241802 | -3.1657879755 | -0.9513302378 |
| H | -0.3716871191 | -4.8725333975 | -0.6354756134 |
| H | -1.6192968558 | -4.9464776623 | 0.596814783   |
| C | 0.2717982393  | -4.2001278911 | 1.3179000732  |
| H | 1.1667609574  | -3.6817068433 | 0.9589914583  |
| H | 0.5874409196  | -5.1829830455 | 1.6828073962  |
| H | -0.1148692539 | -3.6346355145 | 2.1741582689  |
| C | -2.5218009849 | 2.2701854842  | 0.347631018   |
| H | -3.1843523092 | 0.7940041939  | -1.0664228178 |
| H | -1.9231868395 | 1.8330116943  | -1.6870227174 |
| H | -2.8000152377 | 1.7084722884  | 1.2508652387  |
| C | -3.6333319951 | 3.2698330116  | 0.0108162453  |
| H | -1.608991941  | 2.8214812099  | 0.6022921191  |
| C | -3.9129410909 | 4.2571257612  | 1.1474107155  |

|   |               |               |               |
|---|---------------|---------------|---------------|
| H | -4.5525638279 | 2.7211275868  | -0.2356450613 |
| H | -3.3575585137 | 3.822861128   | -0.8976142584 |
| H | -4.7093851346 | 4.9604990063  | 0.8837014375  |
| H | -3.0181487644 | 4.8416798978  | 1.3903136908  |
| H | -4.219918227  | 3.7314003733  | 2.0588453118  |
| C | 2.6779983609  | 0.3066034182  | 0.858183345   |
| C | 3.4327486768  | 1.5826231048  | 1.2975377364  |
| H | 4.0462951961  | 1.9716426592  | 0.4782056506  |
| H | 2.7382473963  | 2.3729183003  | 1.5974430497  |
| H | 4.0918094293  | 1.3709355912  | 2.1476381984  |
| C | 1.8340122769  | -0.216716099  | 2.0437932139  |
| H | 1.3023332355  | -1.1345911001 | 1.7736293094  |
| H | 2.4801192329  | -0.4412389106 | 2.9001415099  |
| H | 1.0919127976  | 0.5153631254  | 2.374566428   |
| C | 3.7215077516  | -0.7709333417 | 0.5105569856  |
| H | 4.3673223337  | -0.4588386634 | -0.3165716413 |
| H | 4.3624848972  | -0.9583862871 | 1.3781711461  |
| H | 3.2493759237  | -1.720590975  | 0.2374330442  |
| H | 3.2493759237  | -1.720590975  | 0.2374330442  |

TS exo 0290

E(RB3LYP) = -706.414907917 A.U.

First frequency = -491.4547  $\text{cm}^{-1}$

|   |               |               |               |
|---|---------------|---------------|---------------|
| H | 0.6240809708  | -1.0428876264 | -3.0550322255 |
| C | 0.7366007015  | -0.2406963974 | -2.3318937355 |
| H | 0.3667308366  | 0.7185670767  | -2.6727722803 |
| C | 1.6995240119  | -0.3464362833 | -1.3440504158 |
| C | 1.8211474786  | 0.5929079651  | -0.2947357924 |
| C | 1.003161813   | 1.7170699604  | -0.3410498185 |
| H | 0.9942113278  | 2.4275686387  | 0.4801982681  |
| H | 0.7402229433  | 2.1530520605  | -1.2963700394 |
| C | -1.1191088691 | 0.9608366977  | -0.3431749702 |
| H | -1.0431870905 | 0.9352712139  | 0.7408752535  |
| C | -1.8159163569 | 2.1687127594  | -0.9307578943 |
| C | -1.1469660883 | -0.2684231835 | -0.9980941006 |
| H | -1.7079591872 | -0.3460274386 | -1.927825979  |
| C | -0.9431623649 | -1.5342382346 | -0.2007595573 |

|   |               |               |               |
|---|---------------|---------------|---------------|
| H | 2.2190289834  | -1.2951425657 | -1.2613252885 |
| H | -1.729324392  | -1.603523793  | 0.5677356285  |
| H | -0.0006632415 | -1.4306436707 | 0.3519016295  |
| C | -0.9372771316 | -2.8311547652 | -1.0140818115 |
| H | -1.871552145  | -2.8956745398 | -1.5882333355 |
| C | -0.7789263274 | -4.0984716384 | -0.1605694613 |
| H | -0.1259857105 | -2.7931357221 | -1.750789997  |
| H | -0.8933462191 | -4.9772336656 | -0.8077643057 |
| H | -1.5966445983 | -4.1503575378 | 0.571410821   |
| C | 0.5665456627  | -4.188520962  | 0.5702420101  |
| H | 1.4014026291  | -4.1077688703 | -0.1361503139 |
| H | 0.6687371335  | -5.14121125   | 1.099956559   |
| H | 0.6824701332  | -3.389050312  | 1.3089918301  |
| C | -3.3501839207 | 2.1321922804  | -0.7618339605 |
| H | -1.5867961753 | 2.2337840108  | -2.0033626138 |
| H | -1.4221410712 | 3.0871689687  | -0.4804304896 |
| H | -3.772735334  | 3.051099052   | -1.1919520097 |
| C | -3.8334360545 | 1.9856325629  | 0.68966003    |
| H | -3.7479532468 | 1.2973518353  | -1.3525692947 |
| C | -3.3461509586 | 3.0975753915  | 1.6248895288  |
| H | -3.5106526851 | 1.0126242782  | 1.0808396008  |
| H | -4.9305293387 | 1.9654795332  | 0.6917135183  |
| H | -3.7798456212 | 2.9930568294  | 2.6246594039  |
| H | -3.6241449801 | 4.0864184949  | 1.241531502   |
| H | -2.2567586963 | 3.0823831446  | 1.7369557802  |
| C | 2.670435172   | 0.3153245733  | 0.963440414   |
| C | 3.3972627893  | -1.0407312504 | 0.9011838009  |
| H | 4.0059110092  | -1.1755973706 | 1.8013034375  |
| H | 2.6937992804  | -1.8779283171 | 0.8491359938  |
| H | 4.0672802005  | -1.101631953  | 0.0374408852  |
| C | 3.7368013693  | 1.4269397982  | 1.1016773172  |
| H | 4.3573960404  | 1.2616626549  | 1.9901811967  |
| H | 4.3930316232  | 1.4455456977  | 0.2253254136  |
| H | 3.2738275627  | 2.414099741   | 1.1919971733  |
| C | 1.7734408522  | 0.3170073458  | 2.2228589794  |
| H | 1.0195458674  | -0.4748103396 | 2.1691966481  |
| H | 2.3783672201  | 0.1480511425  | 3.1209622691  |
| H | 1.2500342305  | 1.2685275047  | 2.3533550105  |

H 1.2500342305 1.2685275047 2.3533550105

TS exo 0301

E(RB3LYP) = -706.413325926 A.U.

First frequency = -484.8948 cm<sup>-1</sup>

|   |               |               |               |
|---|---------------|---------------|---------------|
| H | 1.5206088479  | -0.6829047925 | -3.3130873797 |
| C | 1.2943191054  | 0.0343456815  | -2.5285671853 |
| H | 0.7262644694  | 0.8947969384  | -2.8625212617 |
| C | 2.1060777142  | 0.0873292163  | -1.4078608388 |
| C | 1.793286544   | 0.8833142538  | -0.2820620592 |
| C | 0.6902303358  | 1.7196005473  | -0.3630562637 |
| H | 0.3654073389  | 2.2872428885  | 0.5020490606  |
| H | 0.3939954956  | 2.1476426117  | -1.3117162193 |
| C | -1.1003626476 | 0.2923257636  | -0.7794110123 |
| H | -1.0925464171 | 0.0901934932  | 0.2871849373  |
| C | -2.1477576402 | 1.2696024432  | -1.2770317996 |
| C | -0.6220940368 | -0.7153198319 | -1.6133307625 |
| H | -1.034942221  | -0.7684939633 | -2.6201484553 |
| C | -0.1375670381 | -2.0187569473 | -1.0198657994 |
| H | 2.8672666248  | -0.6790984428 | -1.3123057953 |
| H | 0.5602121216  | -1.7938573299 | -0.2025086948 |
| H | 0.4360577011  | -2.586373351  | -1.7628246783 |
| C | -1.2761116019 | -2.8991402293 | -0.4766173229 |
| H | -1.8443775146 | -2.3318225756 | 0.2728214891  |
| C | -0.7771011625 | -4.2093116989 | 0.1427774904  |
| H | -1.9844987759 | -3.123104378  | -1.2866769678 |
| H | -0.0664462712 | -3.9778485314 | 0.9483137128  |
| H | -0.2084327941 | -4.7725080438 | -0.6097918971 |
| C | -1.909581492  | -5.0820824516 | 0.6910604277  |
| H | -2.6166537599 | -5.3528917221 | -0.1014364549 |
| H | -2.4733707772 | -4.5527356701 | 1.467780096   |
| H | -1.5282752115 | -6.0102059752 | 1.1294376337  |
| C | -2.4310891214 | 2.504856158   | -0.4056741401 |
| H | -3.0939015743 | 0.7167995238  | -1.389036755  |
| H | -1.8800201001 | 1.5961947267  | -2.2919190338 |
| H | -1.5729696911 | 3.1863666932  | -0.4169316228 |
| C | -2.7984744821 | 2.1855150625  | 1.0485343047  |

|   |               |               |               |
|---|---------------|---------------|---------------|
| H | -3.2600017193 | 3.0610906295  | -0.8640573514 |
| C | -3.1853788091 | 3.4342735733  | 1.8461662907  |
| H | -1.9530632424 | 1.691285413   | 1.5432399318  |
| H | -3.6261978697 | 1.4630747686  | 1.0642232043  |
| H | -2.3627518067 | 4.15862433    | 1.8646231888  |
| H | -3.4363560876 | 3.1888062384  | 2.8831809751  |
| H | -4.0531861032 | 3.9342352397  | 1.4010593988  |
| C | 2.5022186832  | 0.6967794821  | 1.0767446682  |
| C | 1.4799105157  | 0.2376357896  | 2.1424999246  |
| H | 1.970285152   | 0.116367392   | 3.1151613695  |
| H | 0.6687220246  | 0.960441966   | 2.2698554556  |
| H | 1.0322597844  | -0.7228793978 | 1.8670784622  |
| C | 3.6301773662  | -0.3496010242 | 1.0189543358  |
| H | 4.1226523336  | -0.4168853534 | 1.9945445019  |
| H | 3.2487891572  | -1.3458850864 | 0.7724757807  |
| H | 4.3928787253  | -0.0818687402 | 0.2804989323  |
| C | 3.1208261354  | 2.0446453713  | 1.5141098348  |
| H | 3.8548174225  | 2.3908132947  | 0.7789822716  |
| H | 2.357419508   | 2.82182551    | 1.6134879871  |
| H | 3.6271253423  | 1.9433495234  | 2.4811554909  |
| H | 3.6271253423  | 1.9433495234  | 2.4811554909  |

TS exo 0309

E(RB3LYP) = -706.412957971 A.U.

First frequency = -500.9155  $\text{cm}^{-1}$

|   |               |               |               |
|---|---------------|---------------|---------------|
| H | 1.6701635059  | -0.6604658445 | -3.3734749244 |
| C | 1.4470142468  | 0.0415904803  | -2.5740985608 |
| H | 0.8398832083  | 0.885333342   | -2.8839160543 |
| C | 2.3162082331  | 0.1305749975  | -1.4964852366 |
| C | 2.0292994965  | 0.9132833766  | -0.356323798  |
| C | 0.8878662164  | 1.7015971938  | -0.378284034  |
| H | 0.5813257572  | 2.2485919123  | 0.5068510453  |
| H | 0.5281179475  | 2.1250568222  | -1.3063884745 |
| C | -0.8585311643 | 0.1995603214  | -0.767781646  |
| H | -0.805160246  | 0.0253219118  | 0.3010067361  |
| C | -1.9201763547 | 1.1679031466  | -1.2540970173 |
| C | -0.361890092  | -0.7976824206 | -1.6053006975 |



|   |               |               |               |
|---|---------------|---------------|---------------|
| H | -0.8165643996 | -0.882390249  | -2.5926627837 |
| C | 0.1881106119  | -2.0862293769 | -1.0322213481 |
| H | 3.1133042351  | -0.6026163521 | -1.4425909695 |
| H | 0.7854336413  | -1.8494131659 | -0.1424882133 |
| H | 0.8779198586  | -2.5481851993 | -1.7476803263 |
| C | -0.8919588998 | -3.1237702518 | -0.6595623305 |
| H | -1.4920223875 | -3.3563562783 | -1.5509613459 |
| C | -1.8290962029 | -2.7158984514 | 0.483391546   |
| H | -0.3862807713 | -4.0599777663 | -0.3837136166 |
| H | -2.3947336204 | -1.8227990026 | 0.195425075   |
| H | -1.2276455988 | -2.4257925719 | 1.3566282417  |
| C | -2.8016607455 | -3.832017689  | 0.8756973007  |
| H | -3.4659250423 | -3.5192269812 | 1.6880479277  |
| H | -2.2649790745 | -4.7278215074 | 1.2088662487  |
| H | -3.4296162508 | -4.1226276969 | 0.0254513336  |
| C | -2.4948407537 | 2.0906756626  | -0.1696813765 |
| H | -2.7507590946 | 0.5977336032  | -1.6968020708 |
| H | -1.5180939253 | 1.7752471673  | -2.0784921752 |
| H | -1.6831678348 | 2.6558108297  | 0.305273235   |
| C | -3.2961502539 | 1.3506067052  | 0.9100088163  |
| H | -3.1477633246 | 2.8352960079  | -0.6438139193 |
| C | -3.8683983295 | 2.2923270144  | 1.9731583244  |
| H | -2.6629388466 | 0.597408773   | 1.3953075664  |
| H | -4.1125614902 | 0.7934739221  | 0.4299468736  |
| H | -4.5342986036 | 3.0376363727  | 1.5231827529  |
| H | -3.067956959  | 2.8354595554  | 2.4887260123  |
| H | -4.4411966301 | 1.7459657781  | 2.7294715522  |
| C | 2.8164878294  | 0.7582703428  | 0.9629287271  |
| C | 1.8737826821  | 0.251650002   | 2.0791875649  |
| H | 2.4192436309  | 0.1538093387  | 3.0247887931  |
| H | 1.0367174528  | 0.934657099   | 2.2499023273  |
| H | 1.4586213554  | -0.7291789759 | 1.8252921846  |
| C | 3.9869207304  | -0.2348942482 | 0.8428015042  |
| H | 4.5324312309  | -0.2799568595 | 1.791079788   |
| H | 3.6395538668  | -1.2475487664 | 0.6135884957  |
| H | 4.6966717381  | 0.0683638448  | 0.0662466149  |
| C | 3.3949473537  | 2.1326753473  | 1.3715636781  |
| H | 3.9549146797  | 2.0538636946  | 2.3107055356  |

|   |              |              |              |
|---|--------------|--------------|--------------|
| H | 4.0733400449 | 2.5123321393 | 0.6004190208 |
| H | 2.6033773988 | 2.8743704242 | 1.5127267022 |
| H | 2.6033773988 | 2.8743704242 | 1.5127267022 |

TS exo 0316

E(RB3LYP) = -706.413894814 A.U.

First frequency = -505.0106 cm<sup>-1</sup>

|   |               |               |               |
|---|---------------|---------------|---------------|
| H | 0.5938713885  | -1.4901935771 | -2.5079793428 |
| C | 0.7569095483  | -0.5749713255 | -1.9468541442 |
| H | 0.1967973743  | 0.2755935149  | -2.3171104358 |
| C | 1.9394933123  | -0.4084522497 | -1.2463851868 |
| C | 2.1777828507  | 0.6955102565  | -0.3956107612 |
| C | 1.2033950423  | 1.683391548   | -0.3394509025 |
| H | 1.2769127466  | 2.5097010138  | 0.3575276291  |
| H | 0.6225080781  | 1.9107346765  | -1.2240601132 |
| C | -0.7104256592 | 0.6560973067  | 0.3098693458  |
| H | -0.3625323713 | 0.7350628758  | 1.3377290573  |
| C | -1.7006730322 | 1.7120107695  | -0.1286281016 |
| C | -0.7409152217 | -0.6196049027 | -0.2546168571 |
| H | -1.5049641652 | -0.8041188858 | -1.0068237461 |
| C | -0.282225256  | -1.808099535  | 0.5623305602  |
| H | 2.6061188671  | -1.2652156677 | -1.1793420713 |
| H | -0.9838841981 | -1.933425893  | 1.4002549643  |
| H | 0.6801580738  | -1.5577553661 | 1.0235002697  |
| C | -0.1481741757 | -3.1513224578 | -0.1724924757 |
| H | 0.7180291261  | -3.114553534  | -0.8424442166 |
| C | -1.3839697377 | -3.584551837  | -0.9777027934 |
| H | 0.0756872712  | -3.9249773379 | 0.574403383   |
| H | -1.1844247357 | -4.5689161485 | -1.4197827711 |
| H | -1.529274009  | -2.9021757712 | -1.8250167051 |
| C | -2.6736004475 | -3.6505490315 | -0.1521940806 |
| H | -2.9622226908 | -2.6622137802 | 0.2206995551  |
| H | -2.5524539467 | -4.3086718642 | 0.7161589328  |
| H | -3.5074876882 | -4.0347285751 | -0.7485985246 |
| C | -3.0900664208 | 1.5219203274  | 0.5056429728  |
| H | -1.8034493823 | 1.6843842274  | -1.2233925957 |
| H | -1.3311526471 | 2.7153462148  | 0.1193255056  |

|   |               |               |               |
|---|---------------|---------------|---------------|
| H | -3.4726720153 | 0.5278996472  | 0.2370191184  |
| C | -4.1007140125 | 2.594546321   | 0.0849361213  |
| H | -2.9903019892 | 1.5219969808  | 1.6002007963  |
| C | -5.4812983712 | 2.3946297524  | 0.7167298191  |
| H | -4.1925633972 | 2.5939715127  | -1.0099178307 |
| H | -3.7108616826 | 3.5852378205  | 0.3559195881  |
| H | -5.9058553704 | 1.4240712931  | 0.4356269516  |
| H | -6.1857098354 | 3.1711366205  | 0.4010105313  |
| H | -5.4212600181 | 2.4228579153  | 1.8107389939  |
| C | 3.3891557142  | 0.6605496529  | 0.5584255583  |
| C | 4.6779691277  | 0.5400108526  | -0.2878541457 |
| H | 4.6851041481  | -0.373297588  | -0.8897651072 |
| H | 4.774785843   | 1.3901795514  | -0.9707323423 |
| H | 5.5613088568  | 0.5190256926  | 0.3608247595  |
| C | 3.4960418104  | 1.9382621836  | 1.4108110491  |
| H | 2.6335134398  | 2.0558208144  | 2.0751002097  |
| H | 4.3908299166  | 1.8920501496  | 2.0403220536  |
| H | 3.5711334278  | 2.8339538479  | 0.7860247482  |
| C | 3.2994260228  | -0.5465973109 | 1.5206200807  |
| H | 3.2395636509  | -1.4951121623 | 0.9795158038  |
| H | 4.1817397579  | -0.5877381075 | 2.169938227   |
| H | 2.4144241867  | -0.4672703721 | 2.1604206525  |
| H | 2.4144241867  | -0.4672703721 | 2.1604206525  |

TS exo 0328

E(RB3LYP) = -706.412990813 A.U.

First frequency = -524.0953 cm<sup>-1</sup>

|   |               |               |               |
|---|---------------|---------------|---------------|
| H | 0.3479978727  | 0.1395268077  | -3.1933018553 |
| C | 0.4666524018  | 0.5712268212  | -2.2028201506 |
| H | -0.1817907658 | 1.4168711293  | -2.0095781563 |
| C | 1.6822462276  | 0.4350049371  | -1.5488234358 |
| C | 1.8718031919  | 0.8292958052  | -0.2061662495 |
| C | 0.8044691504  | 1.4388377903  | 0.4406541658  |
| H | 0.8472272093  | 1.6758472652  | 1.4969627588  |
| H | 0.128750662   | 2.0708963379  | -0.1208305789 |
| C | -0.8937960491 | -0.0512240848 | 0.347191953   |
| H | -0.3934546537 | -0.5990621992 | 1.1404454702  |

|   |               |               |               |
|---|---------------|---------------|---------------|
| C | -2.0193894332 | 0.8453345841  | 0.836835522   |
| C | -0.8816307758 | -0.644860629  | -0.9202448289 |
| H | -1.7058625367 | -0.4104291297 | -1.5911992995 |
| C | -0.2723806887 | -2.0178294311 | -1.1222957994 |
| H | 2.4265944791  | -0.2127373016 | -2.0055391134 |
| H | 0.6406726031  | -2.0977521125 | -0.5230124378 |
| H | 0.0412570098  | -2.1396291593 | -2.1652554295 |
| C | -1.2353382177 | -3.1773788594 | -0.7811074871 |
| H | -2.1352437211 | -3.074993364  | -1.4028282924 |
| C | -1.6598694308 | -3.2944949687 | 0.6908199526  |
| H | -0.759967533  | -4.1203316533 | -1.0866490999 |
| H | -2.4088477116 | -4.0926723675 | 0.7724492412  |
| H | -2.1634920653 | -2.3713746485 | 1.0012622046  |
| C | -0.5046907588 | -3.5983318028 | 1.6509506436  |
| H | 0.0210039527  | -4.5141261673 | 1.3562489953  |
| H | -0.8656736794 | -3.7350707242 | 2.6755932877  |
| H | 0.2339682163  | -2.7905946763 | 1.6690656183  |
| C | -2.7041157744 | 1.7218764066  | -0.2192720258 |
| H | -1.6490873936 | 1.4914975771  | 1.6435288237  |
| H | -2.7863956713 | 0.2083132468  | 1.3057271359  |
| H | -1.9584869624 | 2.3424149302  | -0.7342805552 |
| C | -3.7840687256 | 2.632377131   | 0.3763299847  |
| H | -3.1592393309 | 1.090330783   | -0.9929275145 |
| C | -4.4821739637 | 3.4974092486  | -0.6766762763 |
| H | -3.3315517537 | 3.276724723   | 1.1421932808  |
| H | -4.5275024548 | 2.0154089592  | 0.8992487717  |
| H | -4.9711617914 | 2.8762053008  | -1.4358015955 |
| H | -3.7642857809 | 4.1446087342  | -1.193533373  |
| H | -5.2469141682 | 4.1394547746  | -0.227819597  |
| C | 3.1367439522  | 0.3590134186  | 0.540597101   |
| C | 3.1977619486  | 0.8993620812  | 1.9812137489  |
| H | 2.3773084385  | 0.5137212549  | 2.5952518277  |
| H | 4.1345814378  | 0.5893442387  | 2.4558960605  |
| H | 3.1555411656  | 1.9930436168  | 2.0022610077  |
| C | 3.1811488502  | -1.1854591189 | 0.6082429835  |
| H | 4.0897748731  | -1.5236755554 | 1.1198437256  |
| H | 2.3195891378  | -1.5739018122 | 1.1614662636  |
| H | 3.1703678503  | -1.6363394124 | -0.3879450483 |

|   |              |              |               |
|---|--------------|--------------|---------------|
| C | 4.3832766889 | 0.8726342337 | -0.215732872  |
| H | 5.2988459513 | 0.5527677611 | 0.294937383   |
| H | 4.4242993005 | 0.4923169365 | -1.2403488404 |
| H | 4.3835975115 | 1.9662892431 | -0.2656363238 |
| H | 4.3835975115 | 1.9662892431 | -0.2656363238 |

TS exo 0331

E(RB3LYP) = -706.412707286 A.U.

First frequency = -508.2157  $\text{cm}^{-1}$

|   |               |               |               |
|---|---------------|---------------|---------------|
| H | 1.1144600878  | -1.1518154348 | -2.9472158962 |
| C | 0.9815334352  | -0.3474447897 | -2.2280309123 |
| H | 0.2644264448  | 0.405654192   | -2.5376161525 |
| C | 2.0294200007  | -0.0276169043 | -1.3767766808 |
| C | 1.8955703659  | 0.9056268876  | -0.3236703849 |
| C | 0.6951858043  | 1.5899708826  | -0.2104177946 |
| H | 0.5065835614  | 2.251078506   | 0.625032815   |
| H | 0.1155511237  | 1.818467164   | -1.0952135013 |
| C | -0.950499439  | -0.0622114879 | -0.0378643652 |
| H | -0.70329606   | -0.1083179716 | 1.0199402929  |
| C | -2.1760471892 | 0.7501745135  | -0.4059876145 |
| C | -0.5333170864 | -1.1189792922 | -0.8487342407 |
| H | -1.1593518878 | -1.3406483174 | -1.7124041782 |
| C | 0.1943374002  | -2.2998447389 | -0.2411378529 |
| H | 2.8941808701  | -0.6865009013 | -1.3760050819 |
| H | 1.0216929106  | -1.9252739715 | 0.3708099663  |
| H | 0.6516153567  | -2.9051211014 | -1.031844274  |
| C | -0.7077907379 | -3.1884744602 | 0.6404116651  |
| H | -0.1065413419 | -4.0224024986 | 1.029397523   |
| C | -1.950675804  | -3.7504820327 | -0.0674326821 |
| H | -1.0323506312 | -2.6051438389 | 1.5116433174  |
| H | -2.6025631551 | -2.9191571666 | -0.3651287886 |
| H | -2.5263458017 | -4.3450936944 | 0.6532280747  |
| C | -1.6329967434 | -4.6126597127 | -1.29386957   |
| H | -1.148089157  | -4.0286529553 | -2.0832854813 |
| H | -2.5427787812 | -5.0484664582 | -1.7194776065 |
| H | -0.9582518828 | -5.4363899839 | -1.0326213993 |
| C | -2.5228012203 | 1.8859886625  | 0.5623695361  |

|   |               |               |               |
|---|---------------|---------------|---------------|
| H | -3.0417021083 | 0.0719803168  | -0.4624941394 |
| H | -2.0624823724 | 1.1541580801  | -1.4239427686 |
| H | -2.5861386222 | 1.4802494031  | 1.5822398753  |
| C | -3.8387010204 | 2.590993828   | 0.21588923    |
| H | -1.714275674  | 2.6258318228  | 0.5795549651  |
| C | -4.1797055499 | 3.7273591626  | 1.1839432226  |
| H | -4.6541861184 | 1.8549565022  | 0.209182703   |
| H | -3.7777858101 | 2.9853656852  | -0.8077866598 |
| H | -4.2754397904 | 3.3546481464  | 2.2102235467  |
| H | -5.1226841229 | 4.2152660979  | 0.916848426   |
| H | -3.3956965796 | 4.4933040454  | 1.1839312341  |
| C | 2.9994993861  | 0.9835679441  | 0.7518040078  |
| C | 3.1553639929  | -0.3746840905 | 1.4741200411  |
| H | 3.9559488743  | -0.3236562814 | 2.2212208187  |
| H | 2.2291631093  | -0.6473651012 | 1.9907360671  |
| H | 3.4013511408  | -1.180630912  | 0.7770781493  |
| C | 4.3348140359  | 1.3506609406  | 0.0640998014  |
| H | 5.1405732175  | 1.417220867   | 0.8042032287  |
| H | 4.6277793003  | 0.6049721683  | -0.6805064556 |
| H | 4.2566156509  | 2.3170348453  | -0.4443765279 |
| C | 2.7023054468  | 2.0545504357  | 1.8174254912  |
| H | 1.7935605422  | 1.8234595537  | 2.3829163496  |
| H | 3.52940525    | 2.1062860703  | 2.5331347674  |
| H | 2.5837405573  | 3.0463640915  | 1.3696068978  |
| H | 2.5837405573  | 3.0463640915  | 1.3696068978  |

TS exo 0333

E(RB3LYP) = -706.413228901 A.U.

First frequency = -500.9937  $\text{cm}^{-1}$

|   |              |               |               |
|---|--------------|---------------|---------------|
| H | 1.2987755276 | -0.1253456178 | -3.4606027836 |
| C | 1.1159817588 | 0.3756502401  | -2.5133249082 |
| H | 0.4165336968 | 1.2021890256  | -2.5785225007 |
| C | 2.0937723221 | 0.3305101035  | -1.5305146605 |
| C | 1.8814733941 | 0.8360076084  | -0.2289694637 |
| C | 0.6862677813 | 1.4915980262  | 0.0291603442  |
| H | 0.4428223835 | 1.8103801336  | 1.0369686546  |
| H | 0.1882366292 | 2.0571577311  | -0.7472079836 |

|   |               |               |               |
|---|---------------|---------------|---------------|
| C | -0.9909883121 | -0.0506617368 | -0.5217737503 |
| H | -0.8433649386 | -0.4226799907 | 0.4871286481  |
| C | -2.159545185  | 0.8919267016  | -0.7279290542 |
| C | -0.5002113185 | -0.8137373174 | -1.5800449065 |
| H | -1.0402583116 | -0.7440698371 | -2.5247816007 |
| C | 0.1987263197  | -2.1328159591 | -1.3318538178 |
| H | 2.9463250934  | -0.315041388  | -1.7102421744 |
| H | 0.8357759779  | -2.0361076652 | -0.4454139205 |
| H | 0.8754043943  | -2.3589036791 | -2.163618259  |
| C | -0.7673312851 | -3.3272602179 | -1.1662719841 |
| H | -1.3782096349 | -3.4070262502 | -2.0757808576 |
| C | -1.6989482231 | -3.2833046327 | 0.0546655355  |
| H | -0.1690285657 | -4.2482210914 | -1.1198818661 |
| H | -2.3837185441 | -4.1391103652 | -0.0031479661 |
| H | -2.3266633712 | -2.3857658927 | 0.0040126839  |
| C | -0.9673776213 | -3.3222400363 | 1.4007406708  |
| H | -0.3181946622 | -4.2030630959 | 1.4704189384  |
| H | -1.6752085158 | -3.3627689481 | 2.2351771155  |
| H | -0.3375464475 | -2.4397305506 | 1.5494368313  |
| C | -2.615445672  | 1.6366874231  | 0.5311431572  |
| H | -3.0141238765 | 0.3173084247  | -1.1168137635 |
| H | -1.919228087  | 1.6181702929  | -1.520079718  |
| H | -2.8208334912 | 0.9039208301  | 1.3246809233  |
| C | -3.8612175917 | 2.4993618048  | 0.3036640316  |
| H | -1.803397394  | 2.2705528715  | 0.9063784994  |
| C | -4.3123075618 | 3.2408283042  | 1.5652161781  |
| H | -4.6795545738 | 1.8653234217  | -0.0639619614 |
| H | -3.6565342066 | 3.2243032001  | -0.4961371598 |
| H | -4.5518072376 | 2.5372472641  | 2.3707848355  |
| H | -5.2027583008 | 3.8497421998  | 1.3783658092  |
| H | -3.5236578933 | 3.9068402561  | 1.9337410753  |
| C | 2.8349679488  | 0.508675099   | 0.9408566449  |
| C | 4.0781642857  | -0.2799087101 | 0.4895167892  |
| H | 4.6489771752  | 0.2651756925  | -0.2693196944 |
| H | 4.7398361557  | -0.4484982888 | 1.3454522316  |
| H | 3.8125912707  | -1.2601975515 | 0.0807962919  |
| C | 3.316022936   | 1.8289462664  | 1.5862629363  |
| H | 3.996564255   | 1.6260868511  | 2.4213517881  |

|   |              |               |              |
|---|--------------|---------------|--------------|
| H | 3.8476005324 | 2.4464860018  | 0.8547871408 |
| H | 2.4776461595 | 2.4166953738  | 1.9711110552 |
| C | 2.094238234  | -0.3358683053 | 2.0028848769 |
| H | 1.7765142095 | -1.2961466068 | 1.5843679376 |
| H | 2.7514225044 | -0.5412132197 | 2.8556907331 |
| H | 1.2051627447 | 0.1741893963  | 2.3847596854 |
| H | 1.2051627447 | 0.1741893963  | 2.3847596854 |

TS exo 0335

E(RB3LYP) = -706.413248046 A.U.

First frequency = -503.0586  $\text{cm}^{-1}$

|   |               |               |               |
|---|---------------|---------------|---------------|
| H | 0.0870922088  | 0.1372222591  | -3.1187193166 |
| C | 0.2656955085  | 0.5918964409  | -2.1479294227 |
| H | -0.3337025091 | 1.4705988705  | -1.9499646178 |
| C | 1.4767747497  | 0.3735569662  | -1.5126966486 |
| C | 1.7269344587  | 0.7861407883  | -0.1847049804 |
| C | 0.7390506857  | 1.5206833318  | 0.4607778508  |
| H | 0.8411849136  | 1.7816709304  | 1.5097630545  |
| H | 0.1172694328  | 2.2049981939  | -0.101583128  |
| C | -1.0944463636 | 0.1984515134  | 0.4943841785  |
| H | -0.6276052144 | -0.3163238189 | 1.3308145067  |
| C | -2.1399567458 | 1.2201583993  | 0.9068947194  |
| C | -1.1317924968 | -0.5003564725 | -0.7121299964 |
| H | -1.9414601408 | -0.2951045283 | -1.4072857124 |
| C | -0.5129609242 | -1.8779929462 | -0.7846122069 |
| H | 2.1518912712  | -0.3403022897 | -1.9719256888 |
| H | 0.4972580397  | -1.8170771762 | -0.3643068401 |
| H | -0.3912593129 | -2.1890617741 | -1.8296535357 |
| C | -1.3182015075 | -2.9507963714 | -0.0289980999 |
| H | -1.4394051273 | -2.6386661575 | 1.0172122811  |
| C | -0.6798173417 | -4.3481493898 | -0.0712877642 |
| H | -2.3309374399 | -3.0003167829 | -0.4504421805 |
| H | -0.5585479639 | -4.6602056546 | -1.1177996247 |
| H | -1.3729750284 | -5.0679666235 | 0.3825362042  |
| C | 0.6720551318  | -4.4356344273 | 0.6479402318  |
| H | 1.0518295088  | -5.4625403723 | 0.6565004887  |
| H | 0.5830265101  | -4.1041218488 | 1.6894043658  |



|   |               |               |               |
|---|---------------|---------------|---------------|
| H | 1.4314640431  | -3.8101264485 | 0.1677328966  |
| C | -2.7524102214 | 2.063570253   | -0.2182786411 |
| H | -1.7132973029 | 1.8960105673  | 1.6599264606  |
| H | -2.9541689313 | 0.6877216203  | 1.423367908   |
| H | -1.9607628365 | 2.595304036   | -0.7628649152 |
| C | -3.7740599992 | 3.0845171986  | 0.2955685052  |
| H | -3.2407352532 | 1.4111802027  | -0.9533975781 |
| C | -4.3952236971 | 3.9226791947  | -0.8252025479 |
| H | -3.2880682066 | 3.7463928441  | 1.0251878712  |
| H | -4.5660362498 | 2.5571298999  | 0.8445652737  |
| H | -3.6268203533 | 4.4831701494  | -1.3699690605 |
| H | -5.1198979396 | 4.6441374484  | -0.4342115627 |
| H | -4.9152288461 | 3.2868056161  | -1.5508301652 |
| C | 2.9341882478  | 0.2617387579  | 0.6219507151  |
| C | 3.8650253002  | -0.6333277073 | -0.2166328076 |
| H | 4.2505887514  | -0.1061694069 | -1.0953352872 |
| H | 4.7237132407  | -0.9427083349 | 0.3880998337  |
| H | 3.3576923839  | -1.5420939113 | -0.5571018923 |
| C | 3.7595371578  | 1.4652554571  | 1.1331551458  |
| H | 4.6229092106  | 1.1241566982  | 1.7163038894  |
| H | 4.1290020716  | 2.0656421483  | 0.2952536529  |
| H | 3.1588808612  | 2.1194110224  | 1.7719448729  |
| C | 2.4419564824  | -0.5668451496 | 1.8315497986  |
| H | 3.2942536015  | -0.9237655051 | 2.4210055588  |
| H | 1.8035408415  | 0.020231558   | 2.4980355232  |
| H | 1.8701660076  | -1.4406036844 | 1.5026482919  |
| H | 1.8701660076  | -1.4406036844 | 1.5026482919  |

TS exo 0354

E(RB3LYP) = -706.413025202 A.U.

First frequency = -500.8796  $\text{cm}^{-1}$

|   |              |               |               |
|---|--------------|---------------|---------------|
| H | 1.5856857092 | -1.1486289315 | -3.0198731168 |
| C | 1.3313908645 | -0.3261763843 | -2.3563601712 |
| H | 0.6895074102 | 0.4229766397  | -2.806261111  |
| C | 2.1955685945 | -0.0012350599 | -1.3225866292 |
| C | 1.8704465081 | 0.9533808678  | -0.3314778114 |
| C | 0.6782636058 | 1.6475640264  | -0.4663469992 |

|   |               |               |               |
|---|---------------|---------------|---------------|
| H | 0.3408275717  | 2.3330293427  | 0.2996256004  |
| H | 0.2817361528  | 1.855550181   | -1.451692084  |
| C | -0.964407663  | 0.0102768141  | -0.5173034273 |
| H | -0.8683583632 | -0.0552796568 | 0.5624003986  |
| C | -2.1464582395 | 0.8040134084  | -1.04150649   |
| C | -0.4506274056 | -1.0540919393 | -1.2606224374 |
| H | -0.9259458587 | -1.251480477  | -2.2204964268 |
| C | 0.1413591884  | -2.2555399383 | -0.5514823173 |
| H | 3.0348308455  | -0.6681427836 | -1.1413651454 |
| H | 0.8863480698  | -1.9027051553 | 0.169924285   |
| H | 0.6800400496  | -2.8875482085 | -1.2686619379 |
| C | -0.9044040328 | -3.1101152674 | 0.1909858636  |
| H | -0.3873315822 | -3.9150760617 | 0.7323043447  |
| C | -1.9715307636 | -3.7247907679 | -0.7218520345 |
| H | -1.3973591006 | -2.4919956048 | 0.9539137313  |
| H | -1.4785965505 | -4.3185211076 | -1.5044017377 |
| H | -2.5097350503 | -2.9222353461 | -1.2420789295 |
| C | -2.9712366268 | -4.600944039  | 0.03798241    |
| H | -3.72520886   | -5.0280044118 | -0.6315025128 |
| H | -3.4967637643 | -4.0212433791 | 0.8056989566  |
| H | -2.464421932  | -5.4312720458 | 0.543194132   |
| C | -2.4878656158 | 2.1255424906  | -0.3328955289 |
| H | -3.0344403887 | 0.1547569736  | -0.9797293194 |
| H | -2.001439584  | 0.9958044407  | -2.1141073636 |
| H | -1.7173298991 | 2.8782111546  | -0.5343617786 |
| C | -2.6842493235 | 2.0014525425  | 1.1827535693  |
| H | -3.4123346066 | 2.5192581798  | -0.7767563543 |
| C | -3.1336901597 | 3.3156443129  | 1.8278553399  |
| H | -1.7474265817 | 1.6738183269  | 1.6503859168  |
| H | -3.4216667803 | 1.2137894891  | 1.390573159   |
| H | -3.2614614137 | 3.2108415519  | 2.9101308862  |
| H | -4.088061235  | 3.6551119048  | 1.4093824387  |
| H | -2.3978693678 | 4.1094618474  | 1.6542863948  |
| C | 2.7366658356  | 1.0373945102  | 0.9421429477  |
| C | 4.1887633579  | 1.3762767578  | 0.5340099711  |
| H | 4.6131788315  | 0.6160108106  | -0.1279739395 |
| H | 4.2305030676  | 2.3362870766  | 0.0094337183  |
| H | 4.8300283004  | 1.4421012737  | 1.4205014871  |

|   |              |               |              |
|---|--------------|---------------|--------------|
| C | 2.2458555119 | 2.1292846653  | 1.910835611  |
| H | 2.9123105715 | 2.1840236141  | 2.7778850024 |
| H | 2.2335027545 | 3.1147793997  | 1.4344837861 |
| H | 1.238551828  | 1.9176910917  | 2.2849115612 |
| C | 2.7214757107 | -0.3108306762 | 1.6995483626 |
| H | 1.7042621011 | -0.5676528967 | 2.0134389156 |
| H | 3.0987704435 | -1.129421689  | 1.0802744832 |
| H | 3.3482310661 | -0.2553586856 | 2.5972093125 |
| H | 3.3482310661 | -0.2553586856 | 2.5972093125 |

TS exo 0360

E(RB3LYP) = -706.411752594 A.U.

First frequency = -523.1432 cm<sup>-1</sup>

|   |               |               |               |
|---|---------------|---------------|---------------|
| H | 0.6988570362  | -0.0007667777 | -3.2428002759 |
| C | 0.7587839841  | 0.5186249053  | -2.2898914073 |
| H | 0.1031046593  | 1.3770535045  | -2.2126751176 |
| C | 1.9299276797  | 0.4423275977  | -1.5514211675 |
| C | 2.0371734319  | 0.956016888   | -0.2402367683 |
| C | 0.933096299   | 1.6167047613  | 0.2827572802  |
| H | 0.9123346036  | 1.9482746439  | 1.3139742188  |
| H | 0.2936303491  | 2.1936044185  | -0.372976764  |
| C | -0.7531713925 | 0.1169181006  | 0.2271200997  |
| H | -0.2979631745 | -0.3687631132 | 1.086242438   |
| C | -1.9040828659 | 1.0433900895  | 0.5849689997  |
| C | -0.6767320094 | -0.5790371102 | -0.9847009083 |
| H | -1.4587739596 | -0.3975006989 | -1.7192086847 |
| C | -0.0680230832 | -1.9662978943 | -1.0353066928 |
| H | 2.6983211534  | -0.2431771111 | -1.9005681984 |
| H | 0.8025304735  | -1.9988023008 | -0.3691134189 |
| H | 0.3098291952  | -2.1756969946 | -2.0424734052 |
| C | -1.0498186962 | -3.0920974886 | -0.6470452761 |
| H | -1.9219190831 | -3.0559824951 | -1.3157944284 |
| C | -1.5327315271 | -3.0667820855 | 0.8075031227  |
| H | -0.5609277517 | -4.0574533078 | -0.8406358946 |
| H | -2.0760591649 | -2.1340549649 | 0.9974340499  |
| H | -0.6609781985 | -3.0524682455 | 1.4766516991  |
| C | -2.4282524987 | -4.2602343055 | 1.1528797015  |

|   |               |               |               |
|---|---------------|---------------|---------------|
| H | -2.7668651678 | -4.2222770328 | 2.1935369707  |
| H | -1.8979210855 | -5.2086176189 | 1.0085720291  |
| H | -3.3184657987 | -4.2813797772 | 0.513522919   |
| C | -2.5434966488 | 1.808786453   | -0.582151524  |
| H | -1.5736365552 | 1.768517853   | 1.3407804014  |
| H | -2.6777543924 | 0.4389185027  | 1.0811561855  |
| H | -1.7615218692 | 2.3272773365  | -1.1510676369 |
| C | -3.5968792458 | 2.8380745692  | -0.1433911068 |
| H | -3.0084419572 | 1.1003656496  | -1.2800714906 |
| C | -4.8269180728 | 2.225237355   | 0.5362002509  |
| H | -3.9211249007 | 3.4058094905  | -1.0247039494 |
| H | -3.1291378394 | 3.5662327996  | 0.5333453279  |
| H | -5.575528256  | 2.9912601388  | 0.7628688637  |
| H | -4.5678477838 | 1.7309642337  | 1.4777804653  |
| H | -5.2999073903 | 1.4772985369  | -0.1110477659 |
| C | 3.250055652   | 0.5548289482  | 0.6236852445  |
| C | 4.5457215841  | 0.9897907817  | -0.0984462708 |
| H | 4.5602961801  | 2.0739462913  | -0.2500315567 |
| H | 5.4248339642  | 0.7152815858  | 0.4958362497  |
| H | 4.6461675411  | 0.5149086213  | -1.0785097922 |
| C | 3.2280449491  | 1.2288122929  | 2.0080672472  |
| H | 4.1325420231  | 0.9639934596  | 2.5656075493  |
| H | 3.1919933983  | 2.3196299565  | 1.9231317665  |
| H | 2.3696688735  | 0.9039761621  | 2.6051542118  |
| C | 3.2743225438  | -0.9767672693 | 0.8383720411  |
| H | 4.143221858   | -1.2687150241 | 1.4397300261  |
| H | 2.3729315114  | -1.3085054527 | 1.3645415266  |
| H | 3.3266248265  | -1.5182382381 | -0.1103399473 |
| H | 3.3266248265  | -1.5182382381 | -0.1103399473 |

TS exo 0363

E(RB3LYP) = -706.412224654 A.U.

First frequency = -520.9942 cm<sup>-1</sup>

|   |               |              |               |
|---|---------------|--------------|---------------|
| H | 0.3344903414  | -0.34371832  | -3.1423847506 |
| C | 0.4896647601  | 0.2669817624 | -2.2567570826 |
| H | -0.0399852967 | 1.2111833736 | -2.2719081692 |
| C | 1.6560220746  | 0.1089057063 | -1.5240720617 |

|   |               |               |               |
|---|---------------|---------------|---------------|
| C | 1.867178253   | 0.7421440719  | -0.2787619175 |
| C | 0.8840801326  | 1.6120278438  | 0.175104429   |
| H | 0.9371856618  | 2.0566309349  | 1.1616096167  |
| H | 0.3186304173  | 2.1986224458  | -0.5374464369 |
| C | -1.0148897178 | 0.3915744679  | 0.3050199585  |
| H | -0.6220332479 | -0.0432898977 | 1.2215533598  |
| C | -2.0110427995 | 1.5152949851  | 0.5369178219  |
| C | -1.051631116  | -0.4540193408 | -0.8079112266 |
| H | -1.8177684292 | -0.2746023401 | -1.5584489896 |
| C | -0.5998108361 | -1.8908196349 | -0.6584289377 |
| H | 2.3133694629  | -0.7118238148 | -1.8010267575 |
| H | 0.3664068487  | -1.8941679142 | -0.1445740952 |
| H | -0.4264958694 | -2.3434615977 | -1.6428851473 |
| C | -1.6030557802 | -2.758067316  | 0.1233738959  |
| H | -1.7680063884 | -2.3110489167 | 1.1133570679  |
| C | -1.1610149083 | -4.2201830374 | 0.2917899356  |
| H | -2.5742483804 | -2.7284979591 | -0.3885386466 |
| H | -0.9925518244 | -4.6639992866 | -0.6991927032 |
| H | -1.9832723579 | -4.7893322598 | 0.744136227   |
| C | 0.0980171037  | -4.39330471   | 1.1502433234  |
| H | 0.3356384238  | -5.4519721892 | 1.2974116912  |
| H | -0.0392392734 | -3.9416460604 | 2.1399981488  |
| H | 0.972757987   | -3.920663734  | 0.6926155739  |
| C | -2.5451770614 | 2.2142068528  | -0.7213984746 |
| H | -1.5660413457 | 2.2730499188  | 1.1960252844  |
| H | -2.857945373  | 1.0992252236  | 1.1017993363  |
| H | -1.7022080779 | 2.5420481199  | -1.3424816543 |
| C | -3.4369396704 | 3.4295261619  | -0.4222268993 |
| H | -3.1123445129 | 1.4989003927  | -1.3311094273 |
| C | -4.7382876266 | 3.0867428816  | 0.3121624526  |
| H | -3.6815197998 | 3.9268876477  | -1.3693239543 |
| H | -2.8651247344 | 4.1596461933  | 0.1668002138  |
| H | -5.3667011323 | 3.9744663584  | 0.437265067   |
| H | -4.547545909  | 2.676690311   | 1.3089008785  |
| H | -5.3186410691 | 2.3428232873  | -0.2462309188 |
| C | 3.0416802678  | 0.2785862115  | 0.6077396996  |
| C | 3.1291226455  | 1.075049048   | 1.9226554576  |
| H | 4.0030929881  | 0.7504495081  | 2.4969831599  |

|   |              |               |               |
|---|--------------|---------------|---------------|
| H | 3.2293992326 | 2.1490960471  | 1.7364052307  |
| H | 2.2470948763 | 0.9179202139  | 2.5522059972  |
| C | 2.8971579258 | -1.218865871  | 0.9681128089  |
| H | 3.7422108247 | -1.5505502173 | 1.5825262223  |
| H | 1.9779675262 | -1.3961843137 | 1.5360860676  |
| H | 2.8668412926 | -1.8503596972 | 0.0755874468  |
| C | 4.3618896454 | 0.4896610844  | -0.1685721175 |
| H | 5.217542785  | 0.1694389673  | 0.4370587857  |
| H | 4.381439114  | -0.0819299599 | -1.100898256  |
| H | 4.4982216054 | 1.5459239867  | -0.4221053611 |
| H | 4.4982216054 | 1.5459239867  | -0.4221053611 |

TS exo 0366

E(RB3LYP) = -706.413012382 A.U.

First frequency = -489.3917  $\text{cm}^{-1}$

|   |               |               |               |
|---|---------------|---------------|---------------|
| H | 1.1934506294  | -1.3159251172 | -2.8749273663 |
| C | 1.1988247698  | -0.4087605753 | -2.2763654893 |
| H | 0.6756276545  | 0.4255543526  | -2.7293536858 |
| C | 2.2140357886  | -0.2160605158 | -1.3530386734 |
| C | 2.2112126282  | 0.8574949157  | -0.4340062756 |
| C | 1.1987143332  | 1.8010439447  | -0.5463442262 |
| H | 1.0917627491  | 2.5914411582  | 0.1903021762  |
| H | 0.7900440498  | 2.0478904028  | -1.5173158864 |
| C | -0.7580929897 | 0.6281255913  | -0.3092072885 |
| H | -0.5786525769 | 0.6959306189  | 0.758539961   |
| C | -1.6867448729 | 1.656601278   | -0.9216412189 |
| C | -0.5777377587 | -0.6165438948 | -0.9107160304 |
| H | -1.1714690074 | -0.8293160769 | -1.7982309131 |
| C | -0.1404525956 | -1.8077907472 | -0.0864401026 |
| H | 2.8944442124  | -1.0441704976 | -1.1876248786 |
| H | 0.7374951505  | -1.5163984056 | 0.5030852174  |
| H | 0.1948295487  | -2.6158281981 | -0.7458610101 |
| C | -1.223356199  | -2.3356707917 | 0.8769735251  |
| H | -0.8074781501 | -3.1827135094 | 1.4406963446  |
| C | -2.5297099234 | -2.7769429028 | 0.1999000906  |
| H | -1.4525426679 | -1.5548758331 | 1.6119616478  |
| H | -2.9860772401 | -1.9132209257 | -0.2994594832 |

|   |               |               |               |
|---|---------------|---------------|---------------|
| H | -3.2398512635 | -3.0893144151 | 0.9763859233  |
| C | -2.3557347334 | -3.9141549186 | -0.8125587308 |
| H | -1.7333788448 | -3.60805114   | -1.6600200838 |
| H | -3.3209724264 | -4.2388733975 | -1.2145798075 |
| H | -1.8764024224 | -4.784615105  | -0.34942516   |
| C | -3.2013905436 | 1.3944063774  | -0.750627854  |
| H | -1.4786703145 | 1.6986979982  | -2.0003568217 |
| H | -1.4585433669 | 2.656582342   | -0.5309853621 |
| H | -3.7275795725 | 2.0112801326  | -1.4913864291 |
| C | -3.7971665836 | 1.7150225004  | 0.630172107   |
| H | -3.4176715018 | 0.3504169677  | -1.0127790976 |
| C | -3.3975361572 | 0.7688366555  | 1.7680921371  |
| H | -4.8910762774 | 1.7016371544  | 0.5372029366  |
| H | -3.5319231918 | 2.7466617967  | 0.9006888933  |
| H | -2.332191774  | 0.8357245452  | 2.0023355483  |
| H | -3.6116408476 | -0.2726209676 | 1.5055861976  |
| H | -3.9512673439 | 1.0042629647  | 2.6833168748  |
| C | 3.1472296414  | 0.8888693604  | 0.7929187874  |
| C | 4.1416230698  | -0.2864788087 | 0.8109083149  |
| H | 4.7654563219  | -0.3020902138 | -0.0887111311 |
| H | 4.8077172201  | -0.1940333265 | 1.674959109   |
| H | 3.6304749282  | -1.2513984043 | 0.8907986052  |
| C | 3.9606550659  | 2.2036923815  | 0.7743836466  |
| H | 3.3061380565  | 3.0797557396  | 0.8011314009  |
| H | 4.6311378679  | 2.2568803295  | 1.6400355239  |
| H | 4.5692702313  | 2.2701640089  | -0.1334548247 |
| C | 2.3110412211  | 0.8271787179  | 2.0921600829  |
| H | 2.9659222575  | 0.8652405014  | 2.9701935682  |
| H | 1.6096750005  | 1.6631709828  | 2.1672973278  |
| H | 1.7323245305  | -0.1009581014 | 2.1413889932  |
| H | 1.7323245305  | -0.1009581014 | 2.1413889932  |

TS exo 0370

E(RB3LYP) = -706.412057610 A.U.

First frequency = -510.9141  $\text{cm}^{-1}$

|   |              |               |               |
|---|--------------|---------------|---------------|
| H | 1.077440944  | -1.0066026239 | -3.078602084  |
| C | 1.0228833176 | -0.2225328697 | -2.3275257238 |

|   |               |               |               |
|---|---------------|---------------|---------------|
| H | 0.3619816607  | 0.5960094215  | -2.5933483938 |
| C | 2.1115019553  | -0.0170390502 | -1.4917510269 |
| C | 2.0750974962  | 0.8839294114  | -0.4033561826 |
| C | 0.9354085304  | 1.6559368229  | -0.2367826923 |
| H | 0.8193452699  | 2.2993251692  | 0.6253893086  |
| H | 0.3577303269  | 1.9628740175  | -1.0986597446 |
| C | -0.8367634405 | 0.1348200343  | -0.0921031462 |
| H | -0.5767195137 | 0.0354911144  | 0.958842725   |
| C | -1.9966589988 | 1.0570093889  | -0.4136091089 |
| C | -0.5172695368 | -0.9239639513 | -0.9439799829 |
| H | -1.174179001  | -1.0692104561 | -1.8004483758 |
| C | 0.1310561653  | -2.1746856396 | -0.3859752394 |
| H | 2.9217170268  | -0.740591466  | -1.5362332904 |
| H | 1.006088057   | -1.8796663544 | 0.2028463322  |
| H | 0.506501101   | -2.7995661712 | -1.2060910839 |
| C | -0.8078917148 | -3.0141811829 | 0.5017740196  |
| H | -0.2416088118 | -3.8589209762 | 0.9189260561  |
| C | -2.0442456541 | -3.5515740638 | -0.228007871  |
| H | -1.1319492477 | -2.4065540546 | 1.3577171374  |
| H | -1.7224835686 | -4.1308807453 | -1.1048062855 |
| H | -2.6303534389 | -2.7094289895 | -0.6173987906 |
| C | -2.9321949727 | -4.4204704821 | 0.6669759587  |
| H | -3.8097038375 | -4.7919082966 | 0.1274779436  |
| H | -3.2892847852 | -3.8535046333 | 1.5345106997  |
| H | -2.3810583385 | -5.2887218276 | 1.046345659   |
| C | -2.2711075464 | 2.131575593   | 0.6452612129  |
| H | -2.8995011706 | 0.4440551697  | -0.5424859195 |
| H | -1.833643889  | 1.5382498743  | -1.390966557  |
| H | -2.4489347484 | 1.639103782   | 1.6121556149  |
| C | -3.4590187625 | 3.0497283824  | 0.3189159112  |
| H | -1.3748293035 | 2.7470178992  | 0.7775568051  |
| C | -4.8177561372 | 2.339846348   | 0.2905920315  |
| H | -3.2804119055 | 3.5384674483  | -0.648911005  |
| H | -3.4939897909 | 3.8553380762  | 1.0632129052  |
| H | -4.8700053872 | 1.5887103203  | -0.5038878074 |
| H | -5.6321096644 | 3.0519260672  | 0.1217980297  |
| H | -5.0122423381 | 1.8295127456  | 1.241221411   |
| C | 3.2063152286  | 0.8371585681  | 0.6452753125  |



|   |              |               |               |
|---|--------------|---------------|---------------|
| C | 3.0168348513 | 1.8864214016  | 1.7562065678  |
| H | 3.8613932547 | 1.8474869312  | 2.4520415717  |
| H | 2.9652870219 | 2.9007591989  | 1.3478530113  |
| H | 2.1058805479 | 1.7039645398  | 2.3357707886  |
| C | 3.2749221744 | -0.5552367922 | 1.3141556654  |
| H | 4.0947106465 | -0.5930065453 | 2.040932201   |
| H | 2.34318843   | -0.7763881028 | 1.8452490313  |
| H | 3.4418818773 | -1.3506504277 | 0.5824471285  |
| C | 4.5494145905 | 1.1280294562  | -0.063476581  |
| H | 4.5334554682 | 2.1159966372  | -0.5348634022 |
| H | 5.3749577978 | 1.1056735864  | 0.6572299259  |
| H | 4.7669979498 | 0.3909067963  | -0.8417117682 |
| H | 4.7669979498 | 0.3909067963  | -0.8417117682 |

TS exo 0371

E(RB3LYP) = -706.411808155 A.U.

First frequency = -501.6802 cm<sup>-1</sup>

|   |               |               |               |
|---|---------------|---------------|---------------|
| H | 1.4533938195  | -0.7543449696 | -3.383249536  |
| C | 1.3678727227  | -0.0095548062 | -2.5963574293 |
| H | 0.8531164823  | 0.8955889839  | -2.8960912067 |
| C | 2.2885978382  | -0.0144942094 | -1.5596112972 |
| C | 2.1572698286  | 0.8182570641  | -0.4271555693 |
| C | 1.1091847011  | 1.7302549925  | -0.4203865854 |
| H | 0.8986763945  | 2.3279176683  | 0.4614932892  |
| H | 0.7795499271  | 2.1851403671  | -1.3454813344 |
| C | -0.7765082284 | 0.4865278379  | -0.6171607637 |
| H | -0.682267301  | 0.2925515038  | 0.4452960887  |
| C | -1.7352352699 | 1.5881910362  | -1.0272448239 |
| C | -0.5089371521 | -0.5764094208 | -1.4838129508 |
| H | -1.0318528291 | -0.5783246922 | -2.440182432  |
| C | -0.0915334334 | -1.9379747066 | -0.9685378212 |
| H | 2.9853172408  | -0.8447793251 | -1.5213870294 |
| H | 0.6066843341  | -1.8013886124 | -0.1327123404 |
| H | 0.4685021443  | -2.4680339831 | -1.746866229  |
| C | -1.2557509835 | -2.8436943036 | -0.5146018123 |
| H | -1.9822643341 | -2.9375807507 | -1.3344227471 |
| C | -1.9824183849 | -2.383686419  | 0.7528111006  |

|   |               |               |               |
|---|---------------|---------------|---------------|
| H | -0.8582395932 | -3.8546035359 | -0.3462106969 |
| H | -2.4274585565 | -1.399899171  | 0.5777823569  |
| H | -1.2487184204 | -2.2459978072 | 1.5596513615  |
| C | -3.0699239037 | -3.3624842551 | 1.2041449841  |
| H | -3.8290124438 | -3.4928936705 | 0.42412216    |
| H | -3.5785851675 | -3.0097710015 | 2.1075259705  |
| H | -2.6493266746 | -4.3509746135 | 1.4218903793  |
| C | -3.2159181755 | 1.3336758357  | -0.6431789444 |
| H | -1.6628819018 | 1.7079424212  | -2.1161344001 |
| H | -1.4339198019 | 2.5531824911  | -0.5992836319 |
| H | -3.861074949  | 1.7958903584  | -1.4012718281 |
| C | -3.6278982404 | 1.8990313374  | 0.7267820302  |
| H | -3.4227143497 | 0.2571438072  | -0.6849380365 |
| C | -2.8300861927 | 1.3758534787  | 1.9264313468  |
| H | -4.6934571991 | 1.6879575348  | 0.8851315289  |
| H | -3.5383618314 | 2.9937187135  | 0.6920626522  |
| H | -2.8827825495 | 0.2847543836  | 1.998768903   |
| H | -3.216974131  | 1.7911500746  | 2.8629046098  |
| H | -1.7731495223 | 1.6531923058  | 1.8584352022  |
| C | 2.9732244548  | 0.5882926849  | 0.8619481053  |
| C | 3.7179710215  | 1.8927276802  | 1.2287191006  |
| H | 3.0207562001  | 2.720392423   | 1.388524344   |
| H | 4.3012473036  | 1.7609112303  | 2.1475164719  |
| H | 4.4045124578  | 2.1854512143  | 0.42747875    |
| C | 2.0245298352  | 0.202313113   | 2.0207453523  |
| H | 1.2780089728  | 0.9779736324  | 2.2147185809  |
| H | 1.4905271702  | -0.7268063945 | 1.7964114024  |
| H | 2.5926889041  | 0.0515998224  | 2.9457949604  |
| C | 4.0189327093  | -0.5313851119 | 0.7095638631  |
| H | 4.7214518226  | -0.3200250185 | -0.1032015832 |
| H | 4.5986730233  | -0.6246412327 | 1.6337031011  |
| H | 3.5509365921  | -1.5017574238 | 0.5147117986  |
| H | 3.5509365921  | -1.5017574238 | 0.5147117986  |

TS exo 0372

E(RB3LYP) = -706.413050338 A.U.

First frequency = -502.4034 cm<sup>-1</sup>

|   |               |               |               |
|---|---------------|---------------|---------------|
| H | 0.6630270161  | -0.5069707188 | -3.2849529269 |
| C | 0.8108842399  | 0.1286398893  | -2.4160629906 |
| H | 0.4953892696  | 1.1557706338  | -2.559485142  |
| C | 1.8083603879  | -0.1917344912 | -1.5075497847 |
| C | 1.9787903241  | 0.5046728745  | -0.2892596058 |
| C | 1.1316619554  | 1.573543093   | -0.0365420893 |
| H | 1.1470889142  | 2.0798854344  | 0.9234814375  |
| H | 0.7654656961  | 2.1859964472  | -0.8494669055 |
| C | -1.0054811316 | 0.7069985479  | -0.1555440105 |
| H | -0.8636601429 | 0.2731976174  | 0.8294768619  |
| C | -1.7264635673 | 2.0379641514  | -0.1814066187 |
| C | -1.0820036392 | -0.1518222657 | -1.2526294183 |
| H | -1.6256417286 | 0.2356461957  | -2.1149294113 |
| C | -1.1428532221 | -1.6672312487 | -1.1329361401 |
| H | 2.3220080257  | -1.1369778693 | -1.6474138746 |
| H | -0.7653224893 | -2.1254753569 | -2.0554448219 |
| H | -2.2040007488 | -1.9586008829 | -1.0731022555 |
| C | -0.4015052517 | -2.2762676623 | 0.059933239   |
| H | 0.6315354698  | -1.9171884994 | 0.0569522714  |
| C | -0.4026277926 | -3.8079253357 | 0.0549395961  |
| H | -0.8483539053 | -1.9219336275 | 0.9983980186  |
| H | 0.0490241927  | -4.1663493405 | -0.8802025269 |
| H | -1.4381815148 | -4.174853635  | 0.0522908267  |
| C | 0.3529888967  | -4.3992485862 | 1.2486729582  |
| H | 0.3494860127  | -5.493922648  | 1.2290629213  |
| H | -0.0962258925 | -4.0803734848 | 2.1962899894  |
| H | 1.3981880345  | -4.0682630799 | 1.2541603543  |
| C | -3.2302917166 | 1.8987399398  | 0.1158328047  |
| H | -1.602749317  | 2.5046081523  | -1.1696050994 |
| H | -1.2855654397 | 2.7331823631  | 0.5440985808  |
| H | -3.6813407739 | 1.2263141359  | -0.6263307118 |
| C | -3.9736696742 | 3.2391214892  | 0.1173593833  |
| H | -3.3614946717 | 1.4063366414  | 1.089706984   |
| C | -5.4694470529 | 3.0924816793  | 0.4111650306  |
| H | -3.8353838956 | 3.7294602328  | -0.8560966456 |
| H | -3.5155721393 | 3.9061221217  | 0.86044093    |
| H | -5.6345265167 | 2.6337789909  | 1.3928024232  |
| H | -5.9566105348 | 2.4552146514  | -0.3357000386 |

|   |               |               |               |
|---|---------------|---------------|---------------|
| H | -5.9785686495 | 4.0618417488  | 0.405922359   |
| C | 2.9321181058  | 0.005617606   | 0.8183884048  |
| C | 2.157016203   | -0.249505607  | 2.1317944123  |
| H | 2.844783812   | -0.5839528471 | 2.9166658021  |
| H | 1.6596901749  | 0.6537872964  | 2.495857829   |
| H | 1.3949912022  | -1.0221089042 | 1.9984346256  |
| C | 3.6627558596  | -1.2952620063 | 0.4353608278  |
| H | 4.2532020053  | -1.1745512229 | -0.4785931729 |
| H | 4.350928382   | -1.5811919328 | 1.2374814931  |
| H | 2.9679333635  | -2.1283017173 | 0.2865141397  |
| C | 3.9999188106  | 1.0966182971  | 1.069019954   |
| H | 4.5746768905  | 1.2941784394  | 0.1581042475  |
| H | 3.5382125028  | 2.0377570238  | 1.3822463374  |
| H | 4.6987962112  | 0.7832572529  | 1.8535164208  |
| H | 4.6987962112  | 0.7832572529  | 1.8535164208  |

TS exo 0375

E(RB3LYP) = -706.413370119 A.U.

First frequency = -487.2807  $\text{cm}^{-1}$

|   |               |               |               |
|---|---------------|---------------|---------------|
| H | 1.3793170425  | -0.7365907557 | -3.3906849004 |
| C | 1.1894640175  | -0.034881299  | -2.5827588766 |
| H | 0.675387602   | 0.868510368   | -2.8894956599 |
| C | 1.9917859461  | -0.0721238093 | -1.4543976913 |
| C | 1.714227437   | 0.6968880133  | -0.3011935764 |
| C | 0.6706610289  | 1.6088416877  | -0.3651622793 |
| H | 0.3710155127  | 2.1650426123  | 0.5163880952  |
| H | 0.426716138   | 2.0956824205  | -1.3004833705 |
| C | -1.2001735644 | 0.3331797514  | -0.848640798  |
| H | -1.2281669928 | 0.1131504697  | 0.2139239557  |
| C | -2.1683535867 | 1.3883768395  | -1.3474609175 |
| C | -0.777948077  | -0.6928143934 | -1.6911373669 |
| H | -1.1818086242 | -0.7113598345 | -2.7024911306 |
| C | -0.3614169493 | -2.0204143319 | -1.1010657375 |
| H | 2.7029290347  | -0.8875584695 | -1.381287151  |
| H | 0.3670114895  | -1.8219122683 | -0.3070106484 |
| H | 0.1620885768  | -2.6257648387 | -1.8516131268 |
| C | -1.5365215231 | -2.8320089456 | -0.5263661819 |

|   |               |               |               |
|---|---------------|---------------|---------------|
| H | -2.0582961129 | -2.2250956679 | 0.2259706829  |
| C | -1.1154311252 | -4.1692979049 | 0.1029881     |
| H | -2.2665095709 | -3.0192951477 | -1.3249322625 |
| H | -0.594575653  | -4.7767967321 | -0.6499488005 |
| H | -2.017481254  | -4.7313902064 | 0.3766396114  |
| C | -0.2254599321 | -4.0192414235 | 1.3431707359  |
| H | -0.7127481239 | -3.3938406715 | 2.1007510365  |
| H | 0.7359433095  | -3.5542132635 | 1.1022443894  |
| H | -0.013217129  | -4.991401151  | 1.7999568279  |
| C | -2.3842227405 | 2.6231157412  | -0.456233149  |
| H | -3.1473562274 | 0.9041987556  | -1.4898070252 |
| H | -1.8569401253 | 1.7153832835  | -2.3496846611 |
| H | -1.4795971422 | 3.2413563531  | -0.4331845601 |
| C | -2.8082272376 | 2.301917084   | 0.9821174721  |
| H | -3.1600899088 | 3.246496487   | -0.9209835612 |
| C | -3.1225880058 | 3.5591931556  | 1.7980487896  |
| H | -2.0128910582 | 1.7374527563  | 1.4846885221  |
| H | -3.6861960781 | 1.6415352005  | 0.9635154337  |
| H | -3.9409183894 | 4.1300511215  | 1.3445870031  |
| H | -2.250265274  | 4.2210024879  | 1.8508264953  |
| H | -3.4155305171 | 3.3117958753  | 2.8235306925  |
| C | 2.3848381076  | 0.4077445345  | 1.0592436709  |
| C | 3.1085372598  | 1.6844897836  | 1.5458646942  |
| H | 3.5906156263  | 1.512176508   | 2.5152611764  |
| H | 3.8793304328  | 1.9896420163  | 0.8304694321  |
| H | 2.4109254528  | 2.5194878669  | 1.6597698075  |
| C | 1.3141132392  | 0.0037046515  | 2.0999506789  |
| H | 1.7812840027  | -0.1829144665 | 3.0736435832  |
| H | 0.5626264988  | 0.7861025492  | 2.2402258676  |
| H | 0.7941262319  | -0.9101666947 | 1.7952830884  |
| C | 3.4199385628  | -0.7293809513 | 0.9812337639  |
| H | 3.8858938211  | -0.8734986885 | 1.9614585509  |
| H | 2.9585194366  | -1.6795563968 | 0.6920998016  |
| H | 4.2171757957  | -0.503748434  | 0.2655969382  |
| H | 4.2171757957  | -0.503748434  | 0.2655969382  |

TS exo 0381

E(RB3LYP) = -706.412297341 A.U.

First frequency =  $-522.7273 \text{ cm}^{-1}$

|   |               |               |               |
|---|---------------|---------------|---------------|
| H | 0.3196623984  | -0.2526891147 | -3.1522535082 |
| C | 0.4062978983  | 0.3207062015  | -2.2329278818 |
| H | -0.1970668079 | 1.2196169274  | -2.2137428218 |
| C | 1.567356073   | 0.2184515297  | -1.4815932207 |
| C | 1.7017287899  | 0.8004762202  | -0.2012010186 |
| C | 0.6434852011  | 1.5657096461  | 0.2716430498  |
| H | 0.6399438692  | 1.9600768612  | 1.2806815754  |
| H | 0.0478707148  | 2.1426009814  | -0.4237495191 |
| C | -1.159680003  | 0.1942862289  | 0.2855323384  |
| H | -0.7567694768 | -0.2507761354 | 1.1927093697  |
| C | -2.2423014978 | 1.2300746514  | 0.5386319203  |
| C | -1.0978365015 | -0.5965827899 | -0.8655761508 |
| H | -1.8576722028 | -0.4457905829 | -1.6287403066 |
| C | -0.531619042  | -1.9969796571 | -0.7690236326 |
| H | 2.2943632648  | -0.5316185499 | -1.7836900697 |
| H | 0.4183220895  | -1.9453057749 | -0.2282625368 |
| H | -0.2964478332 | -2.3857427961 | -1.767872883  |
| C | -1.4775730434 | -2.9809821818 | -0.0572378122 |
| H | -1.7041201191 | -2.597682484  | 0.9471601556  |
| C | -0.9181929332 | -4.4078102846 | 0.0559893929  |
| H | -2.4347906073 | -3.0073629145 | -0.5949908641 |
| H | -0.6886983651 | -4.7875054108 | -0.949275575  |
| H | -1.7003745094 | -5.064515379  | 0.4579573892  |
| C | 0.3296805743  | -4.5172437068 | 0.9408699168  |
| H | 0.1306248965  | -4.127669359  | 1.9463870713  |
| H | 1.1720872768  | -3.9514173588 | 0.5308185601  |
| H | 0.6523736058  | -5.5583548598 | 1.0450286575  |
| C | -2.7837655683 | 1.9603988936  | -0.6984142717 |
| H | -1.8716452316 | 1.9653939525  | 1.2621173096  |
| H | -3.0875097647 | 0.7301819451  | 1.0383313146  |
| H | -1.9585732834 | 2.4411920188  | -1.2410303437 |
| C | -3.8478389919 | 3.021251361   | -0.3736681219 |
| H | -3.2174351936 | 1.2287139866  | -1.3903400205 |
| C | -3.3131426065 | 4.2299321472  | 0.4034909743  |
| H | -4.6642163287 | 2.5516196306  | 0.192123572   |
| H | -4.2919806455 | 3.3717574989  | -1.3138127649 |

|   |               |               |               |
|---|---------------|---------------|---------------|
| H | -2.9392965863 | 3.9479009521  | 1.3927308116  |
| H | -4.0951207866 | 4.9817954706  | 0.551173961   |
| H | -2.4880950808 | 4.7081026836  | -0.1374553881 |
| C | 2.8920319295  | 0.3865908604  | 0.6888898199  |
| C | 4.2058525652  | 0.7417670957  | -0.0445124464 |
| H | 5.0724948879  | 0.4605057239  | 0.56483117    |
| H | 4.2900269588  | 0.2217579225  | -1.0030610533 |
| H | 4.2611358888  | 1.8170814288  | -0.2424812315 |
| C | 2.8890065788  | 1.119019402   | 2.0433546695  |
| H | 2.0104863092  | 0.8597080234  | 2.6433084171  |
| H | 3.7750430669  | 0.8363784504  | 2.6213744175  |
| H | 2.9054386847  | 2.205780101   | 1.9129900103  |
| C | 2.8619238324  | -1.134081667  | 0.9711997694  |
| H | 2.8994496322  | -1.7195706544 | 0.0480821032  |
| H | 3.7191846753  | -1.4284536719 | 1.5877119342  |
| H | 1.9494598116  | -1.4127251736 | 1.5084957643  |
| H | 1.9494598116  | -1.4127251736 | 1.5084957643  |

TS exo 0388

E(RB3LYP) = -706.411850702 A.U.

First frequency = -511.8781 cm<sup>-1</sup>

|   |               |               |               |
|---|---------------|---------------|---------------|
| H | 0.5225588899  | -0.8918319377 | -3.0959250437 |
| C | 0.552339445   | -0.1460385704 | -2.3053900308 |
| H | -0.0467117407 | 0.7353196192  | -2.5103194482 |
| C | 1.6777828729  | -0.0712234938 | -1.4964799381 |
| C | 1.7449822245  | 0.7728174493  | -0.3650167016 |
| C | 0.6775339592  | 1.6246166066  | -0.1259904948 |
| H | 0.6342303657  | 2.2280139214  | 0.7711227084  |
| H | 0.1036336865  | 2.0208210565  | -0.9534143624 |
| C | -1.2095723014 | 0.2408289359  | -0.0037124193 |
| H | -0.933007653  | 0.0728259748  | 1.0343468699  |
| C | -2.2977508017 | 1.2647335072  | -0.2552887944 |
| C | -0.9930306404 | -0.7988927393 | -0.9097920455 |
| H | -1.6859475132 | -0.8636322951 | -1.7489958673 |
| C | -0.4280887453 | -2.1175025918 | -0.4276040623 |
| H | 2.4242996039  | -0.8545451897 | -1.6018591227 |
| H | 0.441194957   | -1.916875279  | 0.2096168364  |

|   |               |               |               |
|---|---------------|---------------|---------------|
| H | -0.0575156479 | -2.6974852592 | -1.2796048746 |
| C | -1.4489426632 | -2.9506420536 | 0.3685858843  |
| H | -1.8367650885 | -2.3354835399 | 1.190382753   |
| C | -0.8777402758 | -4.2572572055 | 0.9413383077  |
| H | -2.3118756131 | -3.179516473  | -0.2731445001 |
| H | -1.6330214885 | -4.7174251871 | 1.5913502861  |
| H | -0.0217644193 | -4.0204715042 | 1.58852021    |
| C | -0.4472816335 | -5.2750053944 | -0.1213174878 |
| H | -0.1116843284 | -6.2102530327 | 0.3386935942  |
| H | 0.3764103975  | -4.8978756108 | -0.7356996822 |
| H | -1.2793422987 | -5.5138594424 | -0.7941832946 |
| C | -2.4198503207 | 2.3560494962  | 0.8159684881  |
| H | -3.2651984249 | 0.7425228778  | -0.3223908853 |
| H | -2.1472889939 | 1.7186741055  | -1.2454426405 |
| H | -2.4806347057 | 1.8717504374  | 1.8000001612  |
| C | -3.6366800729 | 3.2756181746  | 0.6338299318  |
| H | -1.5102981742 | 2.9678348336  | 0.8318477185  |
| C | -3.589930947  | 4.1232189812  | -0.6429468862 |
| H | -3.7081738073 | 3.9418602792  | 1.5028500243  |
| H | -4.5532008237 | 2.6696284888  | 0.6379252665  |
| H | -2.6732327821 | 4.7235540353  | -0.6805666493 |
| H | -4.4408520591 | 4.8101765363  | -0.6942981935 |
| H | -3.6150136267 | 3.5024222607  | -1.5442747588 |
| C | 2.8955882239  | 0.5800094498  | 0.6452193591  |
| C | 2.825406814   | 1.5855571452  | 1.809163303   |
| H | 2.847976096   | 2.6194140482  | 1.4501261276  |
| H | 1.9184779769  | 1.4508309252  | 2.4077588201  |
| H | 3.6822620978  | 1.4429931373  | 2.4758825399  |
| C | 2.8640354236  | -0.8444756788 | 1.2459274174  |
| H | 3.6997240281  | -0.9875613093 | 1.9408016377  |
| H | 1.9338446863  | -1.0113665425 | 1.7991221093  |
| H | 2.9378068745  | -1.6143609951 | 0.4728077053  |
| C | 4.2392720463  | 0.7923957993  | -0.0897853834 |
| H | 5.078701486   | 0.6669990499  | 0.6038322238  |
| H | 4.3737068658  | 0.07822062    | -0.9072231866 |
| H | 4.2940109442  | 1.7998908715  | -0.5146177006 |
| H | 4.2940109442  | 1.7998908715  | -0.5146177006 |



TS exo 0390

E(RB3LYP) = -706.412380113 A.U.

First frequency = -503.0512 cm<sup>-1</sup>

|   |               |               |               |
|---|---------------|---------------|---------------|
| H | 1.3745741933  | -0.9242651093 | -3.1027742023 |
| C | 1.1658782966  | -0.1430681383 | -2.3763205975 |
| H | 0.6490919904  | 0.716471883   | -2.7887170105 |
| C | 1.9859781878  | -0.0199779861 | -1.2650121457 |
| C | 1.7003536832  | 0.8717871294  | -0.205883368  |
| C | 0.6082610809  | 1.7137050765  | -0.3451370588 |
| H | 0.2933492441  | 2.3608367346  | 0.4626334008  |
| H | 0.311064172   | 2.056309624   | -1.3278526759 |
| C | -1.2030834483 | 0.2897063384  | -0.6689201077 |
| H | -1.1967630657 | 0.1211140015  | 0.4038508748  |
| C | -2.2427572614 | 1.2611661318  | -1.1941566806 |
| C | -0.7504928768 | -0.7584438658 | -1.4728733463 |
| H | -1.1783091454 | -0.8268220804 | -2.473375513  |
| C | -0.3465514285 | -2.0746885687 | -0.8435648778 |
| H | 2.7282700616  | -0.7970939775 | -1.1002955025 |
| H | 0.3209971958  | -1.8721489537 | 0.0024509476  |
| H | 0.2336381799  | -2.6681655072 | -1.5582099501 |
| C | -1.551645464  | -2.8915566045 | -0.3422162212 |
| H | -2.1390457955 | -2.2642185745 | 0.34030576    |
| C | -1.1680796013 | -4.1957101962 | 0.3744643501  |
| H | -2.2136765037 | -3.1212651286 | -1.1894416552 |
| H | -2.0742645846 | -4.6422056522 | 0.8036647626  |
| H | -0.5133124958 | -3.9579223095 | 1.2243827117  |
| C | -0.4807201077 | -5.2294471535 | -0.5251372019 |
| H | -1.1055997878 | -5.4697161336 | -1.3934206991 |
| H | -0.2901839778 | -6.1617852481 | 0.0165122575  |
| H | 0.4810458566  | -4.8662219983 | -0.9008836094 |
| C | -2.4894408543 | 2.5454300881  | -0.384498666  |
| H | -3.200042401  | 0.7197532834  | -1.259218936  |
| H | -1.9906062175 | 1.529780668   | -2.2298737575 |
| H | -1.6257513251 | 3.2158713254  | -0.4575436413 |
| C | -2.8185730247 | 2.3107835149  | 1.0946199872  |
| H | -3.3255850902 | 3.0846078668  | -0.8501318491 |
| C | -3.1698176929 | 3.6059173784  | 1.8325886873  |

|   |               |               |              |
|---|---------------|---------------|--------------|
| H | -1.9638630695 | 1.835141936   | 1.5914410098 |
| H | -3.6527645929 | 1.5999453233  | 1.1733890915 |
| H | -3.3938351068 | 3.4207225133  | 2.8881373484 |
| H | -4.0446311523 | 4.0911009319  | 1.3848290786 |
| H | -2.3393630787 | 4.3201244727  | 1.7883241714 |
| C | 2.4742358836  | 0.7328812535  | 1.1213221735 |
| C | 2.2449670734  | -0.6656903436 | 1.7403290854 |
| H | 1.1852247163  | -0.8190283639 | 1.9699155996 |
| H | 2.5613681549  | -1.465933025  | 1.065516393  |
| H | 2.8111138088  | -0.7716482684 | 2.6730442268 |
| C | 3.982239145   | 0.9243090447  | 0.8397245645 |
| H | 4.1748422492  | 1.9144273742  | 0.4141627299 |
| H | 4.5594869386  | 0.831724931   | 1.7668844196 |
| H | 4.3625420482  | 0.1790275059  | 0.1352610507 |
| C | 2.0452819715  | 1.7857772477  | 2.159921042  |
| H | 2.6480057139  | 1.679659862   | 3.0679075044 |
| H | 2.1836801625  | 2.8038374464  | 1.7822125376 |
| H | 0.9953450085  | 1.6678478689  | 2.4481139042 |
| H | 0.9953450085  | 1.6678478689  | 2.4481139042 |

TS exo 0400

E(RB3LYP) = -706.412315984 A.U.

First frequency = -524.4960  $\text{cm}^{-1}$

|   |               |               |               |
|---|---------------|---------------|---------------|
| H | 1.4785347347  | -0.288711715  | -3.3765889886 |
| C | 1.3450909553  | 0.3355087899  | -2.4966460124 |
| H | 0.8429848943  | 1.2755570246  | -2.6966215483 |
| C | 2.2397978871  | 0.2117208102  | -1.4417986055 |
| C | 2.0537639627  | 0.8743441594  | -0.2094806211 |
| C | 0.9727870751  | 1.741207625   | -0.1098013106 |
| H | 0.7091116662  | 2.211127219   | 0.8303492948  |
| H | 0.6616296176  | 2.3044755681  | -0.9802628911 |
| C | -0.8658061726 | 0.5084935263  | -0.5817082123 |
| H | -0.8271076499 | 0.1469621601  | 0.4395112536  |
| C | -1.8225439386 | 1.6519376406  | -0.864115082  |
| C | -0.5305275071 | -0.3990911848 | -1.5954057499 |
| H | -1.0234580872 | -0.2558505373 | -2.5577224738 |
| C | -0.1356841712 | -1.8287669668 | -1.2831522775 |

|   |               |               |               |
|---|---------------|---------------|---------------|
| H | 2.9599858717  | -0.6015598958 | -1.4879783866 |
| H | 0.4933693599  | -1.8364120453 | -0.3874235416 |
| H | 0.492525444   | -2.2205691844 | -2.0909597033 |
| C | -1.3222541456 | -2.8007368492 | -1.1037924384 |
| H | -1.9407557004 | -2.7691564154 | -2.011136736  |
| C | -2.2204564138 | -2.5590904699 | 0.1177687293  |
| H | -0.9185716903 | -3.8215944185 | -1.0461835725 |
| H | -3.0471674598 | -3.2804441406 | 0.0880994961  |
| H | -2.6781311022 | -1.5678982225 | 0.0402746772  |
| C | -1.4984901184 | -2.6831012379 | 1.4634715311  |
| H | -1.0041951212 | -3.6570045651 | 1.558167166   |
| H | -2.1979206725 | -2.5805560766 | 2.2997110002  |
| H | -0.730486265  | -1.9127782316 | 1.5856807952  |
| C | -3.3210777828 | 1.3244204443  | -0.6405928038 |
| H | -1.6770117146 | 1.9586265766  | -1.9083828488 |
| H | -1.5735841152 | 2.5318098101  | -0.2566370936 |
| H | -3.9188332184 | 1.9187006539  | -1.3436435902 |
| C | -3.8379289343 | 1.6230566558  | 0.7771435907  |
| H | -3.5071376819 | 0.2746265271  | -0.8977250605 |
| C | -3.1148948876 | 0.8933412936  | 1.9147687673  |
| H | -4.9073639853 | 1.3785116511  | 0.8166728983  |
| H | -3.7688594626 | 2.7059023501  | 0.9509879261  |
| H | -3.5776564619 | 1.1220488755  | 2.8805450881  |
| H | -2.063176504  | 1.1904244453  | 1.9788229385  |
| H | -3.1451807205 | -0.1922298679 | 1.7793873677  |
| C | 2.8975423156  | 0.4499264999  | 1.0095481751  |
| C | 2.6561574745  | -1.0392358806 | 1.3490065206  |
| H | 3.2790545118  | -1.3470985227 | 2.1968729556  |
| H | 1.6096981994  | -1.2102680948 | 1.6222030992  |
| H | 2.8935843133  | -1.69284333   | 0.50511196    |
| C | 4.3921391784  | 0.6598184471  | 0.6745532994  |
| H | 5.0194750485  | 0.3684405717  | 1.5248376455  |
| H | 4.7030712687  | 0.063700547   | -0.1881958855 |
| H | 4.5943871959  | 1.7107985288  | 0.4441935719  |
| C | 2.5674172974  | 1.2808588916  | 2.263182438   |
| H | 3.2205679452  | 0.9829149272  | 3.0900197586  |
| H | 2.7149701486  | 2.3511226364  | 2.0869539497  |
| H | 1.5338976207  | 1.1275379597  | 2.591125551   |

H 1.5338976207 1.1275379597 2.591125551

TS exo 0404

E(RB3LYP) = -706.412787303 A.U.

First frequency = -492.2244  $\text{cm}^{-1}$

|   |               |               |               |
|---|---------------|---------------|---------------|
| H | 1.3003157395  | -0.1297864403 | -3.4693524472 |
| C | 1.2556043232  | 0.4562064276  | -2.55524682   |
| H | 0.8002722467  | 1.4324660432  | -2.6740934622 |
| C | 2.1602564213  | 0.1933970557  | -1.5393244383 |
| C | 2.0737062149  | 0.8047752793  | -0.2684004134 |
| C | 1.0965999206  | 1.7744206669  | -0.0851795835 |
| H | 0.9234446665  | 2.2095836596  | 0.8943093727  |
| H | 0.8036596397  | 2.4152842467  | -0.9065306466 |
| C | -0.8738356948 | 0.7139174101  | -0.5089886329 |
| H | -0.7986929904 | 0.3243932326  | 0.5007140907  |
| C | -1.7376295282 | 1.9444756838  | -0.6926666717 |
| C | -0.6774576768 | -0.1753267678 | -1.5653176884 |
| H | -1.1867696724 | 0.0596757098  | -2.4998165845 |
| C | -0.3757855438 | -1.6424333576 | -1.3444705336 |
| H | 2.8003081625  | -0.6736994358 | -1.6605296759 |
| H | 0.4417768444  | -1.7317275428 | -0.6195210252 |
| H | 0.0055603791  | -2.0705640718 | -2.2777262215 |
| C | -1.5935749834 | -2.4754441705 | -0.8670061918 |
| H | -2.5017063729 | -2.0772244119 | -1.3366949561 |
| C | -1.7821086363 | -2.5303342338 | 0.6586886908  |
| H | -1.489222697  | -3.5053784103 | -1.235067254  |
| H | -2.7852747492 | -2.9150583534 | 0.882466572   |
| H | -1.7494272453 | -1.5162771401 | 1.0727573342  |
| C | -0.7444572723 | -3.406920258  | 1.3692383423  |
| H | -0.8098273806 | -4.4456542364 | 1.0254733873  |
| H | -0.8937377659 | -3.4024507607 | 2.4538779766  |
| H | 0.2779093999  | -3.0644092567 | 1.1780072527  |
| C | -3.2512775174 | 1.6461879882  | -0.7516203183 |
| H | -1.4534481924 | 2.4474836295  | -1.6275090487 |
| H | -1.539928264  | 2.6645420264  | 0.1094117414  |
| H | -3.7880513342 | 2.5988272824  | -0.8628829215 |
| C | -3.8117540389 | 0.8890124537  | 0.4618351225  |

|   |               |               |               |
|---|---------------|---------------|---------------|
| H | -3.4592620539 | 1.0624107948  | -1.657353003  |
| C | -3.5524037891 | 1.5784330518  | 1.8053648033  |
| H | -3.3862983598 | -0.120644546  | 0.483681932   |
| H | -4.8926162801 | 0.759922028   | 0.3229853669  |
| H | -4.0394331591 | 1.0418864435  | 2.6260220503  |
| H | -3.9345074923 | 2.6060874784  | 1.804172962   |
| H | -2.4822620818 | 1.6254050206  | 2.0340299282  |
| C | 2.8601129811  | 0.2799699157  | 0.9511765281  |
| C | 3.7878936769  | -0.8967959653 | 0.5979152031  |
| H | 4.3469577392  | -1.2069119956 | 1.4867466216  |
| H | 3.2247378407  | -1.7659938644 | 0.2422787634  |
| H | 4.5161802833  | -0.6217170314 | -0.1718737148 |
| C | 3.7299560092  | 1.4243906549  | 1.520409248   |
| H | 4.4460574288  | 1.776943401   | 0.7707714535  |
| H | 3.1167088329  | 2.2784574024  | 1.8226628798  |
| H | 4.2927692162  | 1.0847228065  | 2.3977519952  |
| C | 1.8757857692  | -0.2010344329 | 2.0423906023  |
| H | 2.424650158   | -0.5807069437 | 2.9116243441  |
| H | 1.2237929343  | 0.6047064486  | 2.3916066465  |
| H | 1.2382043731  | -1.00668983   | 1.6658261018  |
| H | 1.2382043731  | -1.00668983   | 1.6658261018  |

TS exo 0405

E(RB3LYP) = -706.412609831 A.U.

First frequency = -516.3582 cm<sup>-1</sup>

|   |               |               |               |
|---|---------------|---------------|---------------|
| H | 0.9674283706  | -0.2745410694 | -3.3896730414 |
| C | 0.8668066707  | 0.2653014155  | -2.4512929245 |
| H | 0.1905724633  | 1.1125948417  | -2.5034470397 |
| C | 1.9266598881  | 0.2533484246  | -1.5540744644 |
| C | 1.8299955534  | 0.8134245178  | -0.2611241443 |
| C | 0.6623309211  | 1.4848675924  | 0.0690700883  |
| H | 0.4962269846  | 1.8552873075  | 1.0720703106  |
| H | 0.1052144302  | 2.012207091   | -0.6943985051 |
| C | -1.0503587572 | -0.0602347848 | -0.2823729045 |
| H | -0.8118545186 | -0.4309416081 | 0.7095674295  |
| C | -2.2334301597 | 0.8820543675  | -0.3820069995 |
| C | -0.674362256  | -0.8381540623 | -1.3813110174 |

|   |               |               |               |
|---|---------------|---------------|---------------|
| H | -1.312077094  | -0.7618311136 | -2.2632394163 |
| C | -0.009094607  | -2.1856860339 | -1.1915538024 |
| H | 2.7585357917  | -0.4127552732 | -1.7689339652 |
| H | 0.7226681749  | -2.1109073597 | -0.3810301394 |
| H | 0.5634058852  | -2.4473664795 | -2.0888498708 |
| C | -0.9998922754 | -3.3365727153 | -0.9081149889 |
| H | -1.7165957422 | -3.3921506234 | -1.7388101242 |
| C | -1.7776348991 | -3.2509635687 | 0.4142240543  |
| H | -0.4397737239 | -4.2822449474 | -0.9255676337 |
| H | -2.4933731404 | -4.0823516281 | 0.4485623022  |
| H | -2.3760096331 | -2.3323779536 | 0.4288450489  |
| C | -0.891656064  | -3.3063093865 | 1.6635676829  |
| H | -0.2715388174 | -4.2103883626 | 1.666599329   |
| H | -1.494554115  | -3.3113763327 | 2.5775556912  |
| H | -0.2152089903 | -2.447452823  | 1.7225365424  |
| C | -2.5481704721 | 1.6571365455  | 0.9038182136  |
| H | -3.1273508395 | 0.3004657971  | -0.6571646761 |
| H | -2.0756378665 | 1.5785255053  | -1.2181695405 |
| H | -2.6116007455 | 0.9404645446  | 1.7338940791  |
| C | -3.8510221808 | 2.4681210132  | 0.8410392119  |
| H | -1.7191106903 | 2.3325525425  | 1.1455395497  |
| C | -3.8273666619 | 3.6042597679  | -0.1881955538 |
| H | -4.0521102179 | 2.8893407091  | 1.8341729398  |
| H | -4.6888070576 | 1.7920476623  | 0.6212591912  |
| H | -2.986557504  | 4.2829779165  | -0.0023840704 |
| H | -4.7481678442 | 4.1951112084  | -0.1478794566 |
| H | -3.7257136932 | 3.2250292911  | -1.2100871467 |
| C | 2.9217777613  | 0.4871482518  | 0.7793676989  |
| C | 2.672300966   | 1.1882867459  | 2.1273551873  |
| H | 3.4919665354  | 0.9670066772  | 2.8188948655  |
| H | 2.6149320617  | 2.2752793028  | 2.011342789   |
| H | 1.7451460005  | 0.8449519459  | 2.5980017388  |
| C | 2.9866523647  | -1.0354888505 | 1.0408228219  |
| H | 3.7839191305  | -1.2699596308 | 1.7556820061  |
| H | 2.0423204481  | -1.3974406865 | 1.4608921854  |
| H | 3.1835188337  | -1.5981890966 | 0.1241281029  |
| C | 4.2860752654  | 0.9690943633  | 0.2345883099  |
| H | 5.0832549993  | 0.7541610689  | 0.9554918849  |

|   |              |              |               |
|---|--------------|--------------|---------------|
| H | 4.5465469906 | 0.4755333215 | -0.7060452144 |
| H | 4.2715405336 | 2.0484671154 | 0.0521461568  |
| H | 4.2715405336 | 2.0484671154 | 0.0521461568  |

TS exo 0407

E(RB3LYP) = -706.413564203 A.U.

First frequency = -492.0512 cm<sup>-1</sup>

|   |               |               |               |
|---|---------------|---------------|---------------|
| H | 0.8054134454  | -0.9438478878 | -3.0959548143 |
| C | 0.8713473485  | -0.1454522024 | -2.3628936713 |
| H | 0.4376539778  | 0.7921577177  | -2.6883314557 |
| C | 1.8465530463  | -0.2020178228 | -1.383147758  |
| C | 1.9176441416  | 0.7311727788  | -0.3237034945 |
| C | 1.0318856314  | 1.8033747444  | -0.3523627891 |
| H | 0.9866999679  | 2.504333262   | 0.4758286531  |
| H | 0.7365143991  | 2.2322859839  | -1.3014545378 |
| C | -1.0343160468 | 0.9185825955  | -0.3379367904 |
| H | -0.9468991203 | 0.8822490243  | 0.7449741688  |
| C | -1.8100028065 | 2.0897990908  | -0.9011827122 |
| C | -0.9982836432 | -0.3013923137 | -1.0097139785 |
| H | -1.5612959282 | -0.3966077623 | -1.9365299103 |
| C | -0.7203677652 | -1.5684440648 | -0.2358623869 |
| H | 2.4267767396  | -1.1162067539 | -1.3169756755 |
| H | -1.4696541645 | -1.6602516231 | 0.5631504854  |
| H | 0.245357519   | -1.454662495  | 0.2782186773  |
| C | -0.7050436007 | -2.8505629161 | -1.0723735845 |
| H | -1.690096517  | -2.9893364466 | -1.5409375218 |
| C | -0.3366597797 | -4.1120618031 | -0.2771498182 |
| H | 0.0102497247  | -2.7279236261 | -1.8931110108 |
| H | 0.6567266077  | -3.9728714428 | 0.1721275144  |
| H | -0.2389582148 | -4.9531729396 | -0.9752609682 |
| C | -1.3434658963 | -4.4861252445 | 0.8167980165  |
| H | -1.0672961816 | -5.4268069706 | 1.3043522465  |
| H | -2.3488486556 | -4.610067951  | 0.3973583371  |
| H | -1.4029093918 | -3.7186137931 | 1.594971438   |
| C | -3.3370346716 | 1.9570995178  | -0.7157812698 |
| H | -1.5981026854 | 2.1824297494  | -1.9752725355 |
| H | -1.4677012899 | 3.024801473   | -0.4429850246 |

|   |               |               |               |
|---|---------------|---------------|---------------|
| H | -3.8201152562 | 2.8533460574  | -1.1296881515 |
| C | -3.7935917184 | 1.7640220873  | 0.7389183736  |
| H | -3.6897067746 | 1.1064355725  | -1.3125384701 |
| C | -3.3657963912 | 2.8933287252  | 1.6823482464  |
| H | -3.4067705673 | 0.8084900264  | 1.1148197515  |
| H | -4.8872198372 | 1.6756055084  | 0.7523685309  |
| H | -2.2763764337 | 2.9448642042  | 1.782661802   |
| H | -3.7807602412 | 2.750542745   | 2.6853286073  |
| H | -3.7091375961 | 3.867220317   | 1.3139722228  |
| C | 2.7882069143  | 0.4921727499  | 0.9275700319  |
| C | 3.5861766807  | -0.8224932262 | 0.8527723415  |
| H | 2.9267709472  | -1.6952223229 | 0.7983139534  |
| H | 4.2540960991  | -0.8428260152 | -0.0144097164 |
| H | 4.2052804333  | -0.9312006371 | 1.7492583486  |
| C | 3.7940817945  | 1.6586072603  | 1.0671164735  |
| H | 4.4265180552  | 1.5228030487  | 1.9522764772  |
| H | 4.4445329023  | 1.7170023197  | 0.1881956279  |
| H | 3.2786313331  | 2.6187389659  | 1.1642822517  |
| C | 1.8992511126  | 0.4372404007  | 2.1915730488  |
| H | 1.1850913602  | -0.3901876328 | 2.1331987305  |
| H | 2.5169451852  | 0.2896761071  | 3.0847537529  |
| H | 1.3308334883  | 1.3606558513  | 2.3346428501  |
| H | 1.3308334883  | 1.3606558513  | 2.3346428501  |

TS exo 0413

E(RB3LYP) = -706.412078580 A.U.

First frequency = -514.7902 cm<sup>-1</sup>

|   |               |               |               |
|---|---------------|---------------|---------------|
| H | 0.948642005   | -1.4422035692 | -2.6378475798 |
| C | 1.0325166438  | -0.5091074327 | -2.0879801032 |
| H | 0.5147114784  | 0.3244975393  | -2.5483208815 |
| C | 2.1204612308  | -0.3117267821 | -1.2539780465 |
| C | 2.2394592034  | 0.8091429413  | -0.400325255  |
| C | 1.2576647898  | 1.7895528602  | -0.4889148648 |
| H | 1.2423363107  | 2.6333846239  | 0.190516522   |
| H | 0.8042612941  | 1.9973987547  | -1.4497394388 |
| C | -0.7033062642 | 0.7800094249  | -0.0634010709 |
| H | -0.4986614119 | 0.8886835321  | 0.9984928866  |



|   |               |               |               |
|---|---------------|---------------|---------------|
| C | -1.6255396285 | 1.8178004821  | -0.6723570226 |
| C | -0.6638769233 | -0.5144847683 | -0.5830296002 |
| H | -1.3126331453 | -0.7321357602 | -1.4273869338 |
| C | -0.2852085933 | -1.6808026832 | 0.3085522684  |
| H | 2.7864272262  | -1.1559429805 | -1.0913129329 |
| H | -0.8377385049 | -1.6061566239 | 1.257583838   |
| H | 0.7706316177  | -1.5722014407 | 0.5810981524  |
| C | -0.5323069057 | -3.074036758  | -0.2985733824 |
| H | -0.3199330139 | -3.0427010538 | -1.3753025502 |
| C | -1.9486332928 | -3.6292660616 | -0.0678221248 |
| H | 0.1835017768  | -3.7860355694 | 0.130177712   |
| H | -2.103430309  | -3.7572162643 | 1.0124463744  |
| H | -2.0068717546 | -4.6351605518 | -0.5036110115 |
| C | -3.084787125  | -2.7701466414 | -0.6339382887 |
| H | -3.1184784222 | -1.7851801371 | -0.1578141797 |
| H | -4.0565375239 | -3.2490964654 | -0.4742099565 |
| H | -2.9643765369 | -2.6126831794 | -1.7122435985 |
| C | -3.1194052976 | 1.5449424382  | -0.4039497365 |
| H | -1.4697856832 | 1.8476266806  | -1.75994687   |
| H | -1.3676379894 | 2.8161060884  | -0.2968618736 |
| H | -3.7189595074 | 2.3199476925  | -0.90175878   |
| C | -3.4916089575 | 1.4971157731  | 1.0819898334  |
| H | -3.3965169594 | 0.5912088154  | -0.8727027744 |
| C | -4.9841227366 | 1.2414714347  | 1.3089465235  |
| H | -3.1984690707 | 2.4420769101  | 1.5603370406  |
| H | -2.9077180558 | 0.7104446282  | 1.576044324   |
| H | -5.5949871233 | 2.0263686253  | 0.8482776988  |
| H | -5.230520716  | 1.2091877147  | 2.3752864363  |
| H | -5.2885317372 | 0.2856009556  | 0.8670104976  |
| C | 3.3206870626  | 0.8067355196  | 0.6996179539  |
| C | 3.1375883945  | -0.3980767922 | 1.6517221314  |
| H | 2.1645778967  | -0.3540007732 | 2.1515219795  |
| H | 3.1984705157  | -1.3507265578 | 1.118003497   |
| H | 3.9157210649  | -0.3995853395 | 2.4238808488  |
| C | 4.7084967052  | 0.7129357185  | 0.0239270771  |
| H | 5.502901452   | 0.7104949608  | 0.7792308703  |
| H | 4.8096363807  | -0.2003781265 | -0.5695293147 |
| H | 4.8736533455  | 1.564643958   | -0.6437845275 |

|   |              |              |              |
|---|--------------|--------------|--------------|
| C | 3.2887647534 | 2.0898693136 | 1.5500738698 |
| H | 4.0954096135 | 2.0656130638 | 2.2901375594 |
| H | 3.4255801886 | 2.9849664164 | 0.9350068304 |
| H | 2.3450616586 | 2.1908056049 | 2.0963320287 |
| H | 2.3450616586 | 2.1908056049 | 2.0963320287 |

TS exo 0434

E(RB3LYP) = -706.412944135 A.U.

First frequency = -522.7710 cm<sup>-1</sup>

|   |               |               |               |
|---|---------------|---------------|---------------|
| H | 0.240569819   | -1.3077594233 | -2.7733151678 |
| C | 0.3140887143  | -0.476851545  | -2.0775183637 |
| H | -0.2461059868 | 0.3997824925  | -2.3846540242 |
| C | 1.4441425328  | -0.3624558775 | -1.2811475059 |
| C | 1.5683426191  | 0.620900011   | -0.2742319922 |
| C | 0.5588482     | 1.5684902038  | -0.1683961939 |
| H | 0.5548213699  | 2.2915807243  | 0.6370704388  |
| H | 0.0362094108  | 1.8967889811  | -1.0572893977 |
| C | -1.4281756726 | 0.3950605536  | 0.0917583213  |
| H | -1.217625208  | 0.4243282539  | 1.1579718337  |
| C | -2.4197028616 | 1.4172464474  | -0.4256434385 |
| C | -1.2618031243 | -0.8248405272 | -0.565249844  |
| H | -1.9361616242 | -1.0411484867 | -1.3934105355 |
| C | -0.7533382718 | -2.0176121162 | 0.2143626325  |
| H | 2.1471980638  | -1.1921468282 | -1.2852174243 |
| H | -1.4741509088 | -2.2410668036 | 1.0161763711  |
| H | 0.1735642998  | -1.7277397897 | 0.7233101117  |
| C | -0.514715366  | -3.2949495228 | -0.594111232  |
| H | -1.4319889838 | -3.563184478  | -1.1380792269 |
| C | -0.075667238  | -4.4770474342 | 0.2770851847  |
| H | 0.2504607154  | -3.110916417  | -1.3572065927 |
| H | -0.8414951868 | -4.6719734645 | 1.0401784002  |
| H | 0.8345737922  | -4.1983372225 | 0.8258864078  |
| C | 0.1818818226  | -5.7522123281 | -0.530392454  |
| H | 0.4957373679  | -6.5809757451 | 0.1126021     |
| H | 0.9680685114  | -5.5929247984 | -1.277404182  |
| H | -0.7208684832 | -6.068280776  | -1.0657316243 |
| C | -2.5180953362 | 2.7026603547  | 0.4030798829  |

|   |               |               |               |
|---|---------------|---------------|---------------|
| H | -3.4179169944 | 0.9545656393  | -0.464554452  |
| H | -2.1820462301 | 1.6709303372  | -1.4707973661 |
| H | -2.7257096782 | 2.4388123538  | 1.4499567694  |
| C | -3.6010171719 | 3.6624382989  | -0.1014253915 |
| H | -1.5525045829 | 3.2218483553  | 0.4068427135  |
| C | -3.6954321412 | 4.945623132   | 0.7288165828  |
| H | -4.5719654598 | 3.1485455423  | -0.0979332695 |
| H | -3.3965428554 | 3.9170697785  | -1.1504736184 |
| H | -2.7470535359 | 5.4948948226  | 0.7139408638  |
| H | -3.9289614752 | 4.7207407341  | 1.7758221324  |
| H | -4.4744774087 | 5.6148431027  | 0.3495448664  |
| C | 2.7259909743  | 0.5157023278  | 0.7414181681  |
| C | 4.060188835   | 0.6159510003  | -0.0350753572 |
| H | 4.1230252547  | 1.5649055301  | -0.5772647949 |
| H | 4.9104302797  | 0.5578641408  | 0.6543769193  |
| H | 4.1657564443  | -0.192320549  | -0.7645920055 |
| C | 2.6932896486  | 1.6489386953  | 1.783116908   |
| H | 3.5477252175  | 1.5551716007  | 2.4615063541  |
| H | 2.7488745917  | 2.6342165328  | 1.3095337246  |
| H | 1.7840556073  | 1.6127593783  | 2.3923919541  |
| C | 2.6859603024  | -0.828606663  | 1.5039972332  |
| H | 1.7763319033  | -0.9060114727 | 2.1082099121  |
| H | 2.7127754303  | -1.6853720244 | 0.8247573837  |
| H | 3.5455517129  | -0.9120877732 | 2.1790653362  |
| H | 3.5455517129  | -0.9120877732 | 2.1790653362  |

TS exo 0437

E(RB3LYP) = -706.411803936 A.U.

First frequency = -501.8484 cm<sup>-1</sup>

|   |              |               |               |
|---|--------------|---------------|---------------|
| H | 1.1158660102 | -0.1148621365 | -3.4304139459 |
| C | 1.0349323063 | 0.4217982789  | -2.4884772058 |
| H | 0.3531985384 | 1.2649808803  | -2.5179253306 |
| C | 2.0991594924 | 0.3810731861  | -1.5994017617 |
| C | 2.0210564742 | 0.9338800127  | -0.3022403577 |
| C | 0.8744052827 | 1.636515472   | 0.0389106504  |
| H | 0.7357886102 | 1.9992122652  | 1.0516449881  |
| H | 0.3236857239 | 2.1909004705  | -0.7094391922 |

|   |               |               |               |
|---|---------------|---------------|---------------|
| C | -0.8814303749 | 0.1217250324  | -0.2929376345 |
| H | -0.6436173533 | -0.221042103  | 0.7094542694  |
| C | -2.0425709596 | 1.0883286681  | -0.4198869386 |
| C | -0.5124835412 | -0.6904946262 | -1.3641958457 |
| H | -1.139245557  | -0.6420643581 | -2.2550067128 |
| C | 0.182208985   | -2.0153382379 | -1.1334132969 |
| H | 2.9134877231  | -0.2954682587 | -1.8337897622 |
| H | 0.9108147874  | -1.8950237614 | -0.3215963827 |
| H | 0.7604510612  | -2.292083528  | -2.0222449754 |
| C | -0.7727638817 | -3.1790595687 | -0.7945917609 |
| H | -1.5070607078 | -3.2905132645 | -1.6052972752 |
| C | -1.5146234531 | -3.051495727  | 0.5407178052  |
| H | -0.189029054  | -4.1104080624 | -0.7863341623 |
| H | -2.1497406151 | -2.158592569  | 0.5239619331  |
| H | -0.7833154162 | -2.8889971049 | 1.3450207998  |
| C | -2.3682566447 | -4.2820574231 | 0.8610074315  |
| H | -2.8936032145 | -4.1703703339 | 1.8152288293  |
| H | -1.7526485148 | -5.1869124994 | 0.9225725055  |
| H | -3.1223963041 | -4.450311521  | 0.0834182523  |
| C | -2.3863288748 | 1.8339696185  | 0.8751117339  |
| H | -2.9263169652 | 0.5297066989  | -0.757364605  |
| H | -1.8402785941 | 1.8177256174  | -1.2202245757 |
| H | -2.6120132523 | 1.0963579894  | 1.658726633   |
| C | -3.5628993923 | 2.8133570598  | 0.7472005169  |
| H | -1.5037031355 | 2.3836357648  | 1.2200404228  |
| C | -4.9096648056 | 2.1461464285  | 0.4439638974  |
| H | -3.3341695408 | 3.5499098381  | -0.0355065789 |
| H | -3.6494969037 | 3.3814989565  | 1.682041794   |
| H | -4.9073058115 | 1.6450475474  | -0.5292158471 |
| H | -5.721044038  | 2.8811421423  | 0.431779566   |
| H | -5.1526752912 | 1.3931300954  | 1.2028451933  |
| C | 3.0641549487  | 0.6103944757  | 0.7894443068  |
| C | 4.2168144507  | -0.267048589  | 0.2676772237  |
| H | 4.9444316904  | -0.4359985304 | 1.0682232975  |
| H | 3.8623047467  | -1.2469172069 | -0.0682480069 |
| H | 4.7444708439  | 0.210694392   | -0.5642356715 |
| C | 3.6694462508  | 1.9318951188  | 1.3168559735  |
| H | 4.1634752979  | 2.4815324783  | 0.5088504559  |

|   |              |               |              |
|---|--------------|---------------|--------------|
| H | 2.8997933434 | 2.5836763987  | 1.7404711903 |
| H | 4.4116105078 | 1.7335152667  | 2.0989041728 |
| C | 2.3857549135 | -0.1397319837 | 1.959018831  |
| H | 1.5784328385 | 0.4457503581  | 2.408032891  |
| H | 1.9610033975 | -1.0902639195 | 1.6201635831 |
| H | 3.1152729039 | -0.3570193752 | 2.7476175702 |
| H | 3.1152729039 | -0.3570193752 | 2.7476175702 |

TS exo 0438

E(RB3LYP) = -706.413844464 A.U.

First frequency = -503.9778 cm<sup>-1</sup>

|   |               |               |               |
|---|---------------|---------------|---------------|
| H | 0.3667541737  | -0.9772577847 | -3.068465148  |
| C | 0.3939760703  | -0.2575068211 | -2.2554301546 |
| H | -0.1831712362 | 0.6406694566  | -2.4426793903 |
| C | 1.4678499564  | -0.2663696068 | -1.3807027599 |
| C | 1.5151307903  | 0.5516270469  | -0.2295562878 |
| C | 0.4980577261  | 1.4823366563  | -0.0533200268 |
| H | 0.4501557749  | 2.0734797148  | 0.8551751084  |
| H | 0.0413614003  | 1.9572763346  | -0.9119259409 |
| C | -1.4806176089 | 0.2936427049  | -0.0491349064 |
| H | -1.3243692228 | 0.2023193599  | 1.0230326076  |
| C | -2.4575803738 | 1.3626745069  | -0.4960437473 |
| C | -1.2660724283 | -0.8414063221 | -0.8267874035 |
| H | -1.8819390703 | -0.9758104388 | -1.7146899805 |
| C | -0.7155223623 | -2.088947761  | -0.1770509031 |
| H | 2.1722707453  | -1.0861559595 | -1.4717166473 |
| H | -1.3994879877 | -2.4044853418 | 0.6263638356  |
| H | 0.2228267568  | -1.8190839817 | 0.3231383889  |
| C | -0.487857283  | -3.2732629721 | -1.1207184107 |
| H | -1.4244262088 | -3.4903176174 | -1.6522020827 |
| C | -0.0028241218 | -4.5471253709 | -0.4124405426 |
| H | 0.2426875541  | -2.9907820804 | -1.8883428258 |
| H | 0.0305384568  | -5.3664734538 | -1.1416731838 |
| H | -0.7389558449 | -4.8446510403 | 0.3470001355  |
| C | 1.3765778119  | -4.4052719537 | 0.2426292619  |
| H | 2.1260568516  | -4.0828223334 | -0.4899956014 |
| H | 1.7143936542  | -5.3554258308 | 0.6689778404  |

|   |               |               |               |
|---|---------------|---------------|---------------|
| H | 1.368586182   | -3.6675978441 | 1.051389525   |
| C | -2.6165567894 | 2.538209804   | 0.4743517134  |
| H | -3.4455334674 | 0.9006110422  | -0.6442352105 |
| H | -2.1670138937 | 1.7419785754  | -1.4881026248 |
| H | -2.8806414502 | 2.149193411   | 1.4681355029  |
| C | -3.6785902112 | 3.5484827235  | 0.0274819754  |
| H | -1.6578400362 | 3.0561240183  | 0.5963551436  |
| C | -3.8335492815 | 4.7213050285  | 0.9997283189  |
| H | -4.6427659341 | 3.0346869688  | -0.0874150061 |
| H | -3.4171099723 | 3.9289729888  | -0.9695052814 |
| H | -4.1243602037 | 4.370484568   | 1.9965601689  |
| H | -4.5964128605 | 5.4289963054  | 0.6594249323  |
| H | -2.8915739898 | 5.2714514902  | 1.1063818626  |
| C | 2.5463698006  | 0.325491629   | 0.8972529263  |
| C | 3.5150505963  | -0.8318044898 | 0.59155602    |
| H | 4.078675604   | -0.6551449076 | -0.3302942404 |
| H | 4.2391076892  | -0.932731102  | 1.4067021896  |
| H | 2.9903964738  | -1.7875404038 | 0.4950980977  |
| C | 3.3807617695  | 1.6154710245  | 1.0758429992  |
| H | 4.12510453    | 1.4896397737  | 1.8708322691  |
| H | 3.9089152322  | 1.8665796467  | 0.1500910449  |
| H | 2.7464664612  | 2.4672201451  | 1.338698015   |
| C | 1.8245055841  | 0.0035260282  | 2.2259553261  |
| H | 1.2439259892  | -0.9208134151 | 2.1438141817  |
| H | 2.5541611599  | -0.126072166  | 3.0333810051  |
| H | 1.1401737711  | 0.8022471322  | 2.5258396402  |
| H | 1.1401737711  | 0.8022471322  | 2.5258396402  |

TS exo 0440

E(RB3LYP) = -706.413065498 A.U.

First frequency = -483.8548 cm<sup>-1</sup>

|   |              |               |               |
|---|--------------|---------------|---------------|
| H | 0.5842505039 | -1.2611136009 | -2.7312402411 |
| C | 0.6915804513 | -0.407982804  | -2.0680763358 |
| H | 0.0473833975 | 0.4282352096  | -2.3104734095 |
| C | 1.8633800368 | -0.2459196823 | -1.351641243  |
| C | 2.0286586795 | 0.7614627582  | -0.3729046814 |
| C | 0.9954827213 | 1.6761703646  | -0.2097575733 |

|   |               |               |               |
|---|---------------|---------------|---------------|
| H | 1.0316402139  | 2.4164414866  | 0.583796145   |
| H | 0.4003229935  | 1.9785113557  | -1.0617737046 |
| C | -0.8373452668 | 0.4652178749  | 0.3459687347  |
| H | -0.4813685751 | 0.4954063075  | 1.3735376607  |
| C | -1.9111189509 | 1.4708847265  | -0.0059363086 |
| C | -0.7669519741 | -0.7584397756 | -0.3138588186 |
| H | -1.5143025697 | -0.9590488414 | -1.0774170269 |
| C | -0.1337775412 | -1.9445185886 | 0.3761998741  |
| H | 2.5840653055  | -1.0555272066 | -1.3963929601 |
| H | -0.7283872956 | -2.1813522407 | 1.2706245287  |
| H | 0.8492847321  | -1.6338136725 | 0.7550028914  |
| C | 0.0370490999  | -3.2215657028 | -0.4610431522 |
| H | 0.8161898077  | -3.0592808668 | -1.2141723662 |
| C | -1.2367078282 | -3.721596266  | -1.162262667  |
| H | 0.4101843223  | -4.014374309  | 0.2012148573  |
| H | -1.0018353553 | -4.6584834317 | -1.6831347135 |
| H | -1.5287951911 | -3.0116229077 | -1.9466635633 |
| C | -2.4209766077 | -3.9483070539 | -0.2164282116 |
| H | -3.2772511956 | -4.376041113  | -0.7479225146 |
| H | -2.751808264  | -3.0106507338 | 0.2423562973  |
| H | -2.1526197482 | -4.6363833066 | 0.5937820617  |
| C | -3.2741136094 | 1.1178666581  | 0.6196786456  |
| H | -2.0254880115 | 1.5172871728  | -1.0990832022 |
| H | -1.6087466606 | 2.4739915093  | 0.3150718876  |
| H | -3.5489572846 | 0.1046325799  | 0.300278545   |
| C | -4.4066450717 | 2.0911738856  | 0.257749028   |
| H | -3.16610789   | 1.0738988961  | 1.7127187665  |
| C | -4.2158490922 | 3.5099693739  | 0.8064822674  |
| H | -5.3528646101 | 1.6855705146  | 0.6380895607  |
| H | -4.5106263073 | 2.1318766044  | -0.8354231368 |
| H | -4.0935423325 | 3.4948870401  | 1.895882818   |
| H | -5.079398579  | 4.1426611936  | 0.5768173617  |
| H | -3.3318311366 | 3.9960566364  | 0.3816193488  |
| C | 3.205579448   | 0.7524438458  | 0.6251885381  |
| C | 4.1809715547  | -0.4137647816 | 0.3819018152  |
| H | 4.6079031691  | -0.3814927064 | -0.6257292414 |
| H | 5.0104312439  | -0.3570808862 | 1.0943623876  |
| H | 3.6946201912  | -1.3854300662 | 0.5173340651  |

|   |              |               |               |
|---|--------------|---------------|---------------|
| C | 3.9935848468 | 2.0754281543  | 0.4812925997  |
| H | 3.3573951794 | 2.9420738768  | 0.6840193581  |
| H | 4.8367682615 | 2.1034954515  | 1.1814199014  |
| H | 4.3890737381 | 2.182662656   | -0.5341358745 |
| C | 2.67471638   | 0.6349728548  | 2.0725106912  |
| H | 2.0039884635 | 1.4590577933  | 2.3317427585  |
| H | 2.1251936742 | -0.3012284518 | 2.2137405323  |
| H | 3.5066839365 | 0.6505304893  | 2.7858016666  |
| H | 3.5066839365 | 0.6505304893  | 2.7858016666  |

TS exo 0448

E(RB3LYP) = -706.412664987 A.U.

First frequency = -482.2818  $\text{cm}^{-1}$

|   |               |               |               |
|---|---------------|---------------|---------------|
| H | 1.3507068781  | -1.5640421232 | -2.857419756  |
| C | 1.1703405669  | -0.6658897929 | -2.2727259147 |
| H | 0.5340968986  | 0.0632494817  | -2.760495995  |
| C | 2.0814096838  | -0.3008047609 | -1.2964251968 |
| C | 1.8427372876  | 0.7625390137  | -0.3953585854 |
| C | 0.700559259   | 1.5270846318  | -0.5790046706 |
| H | 0.4365145732  | 2.3010755311  | 0.1332087309  |
| H | 0.2956675838  | 1.6797322453  | -1.5708505404 |
| C | -1.0558387487 | 0.0149794719  | -0.4065947416 |
| H | -0.935638623  | 0.1014671879  | 0.668860427   |
| C | -2.190115688  | 0.808412896   | -1.0268367621 |
| C | -0.6213212947 | -1.1698953846 | -0.994972529  |
| H | -1.123557757  | -1.4841630884 | -1.9085828033 |
| C | -0.0292961329 | -2.2683545909 | -0.1392246931 |
| H | 2.881853644   | -1.0000153344 | -1.0809886598 |
| H | 0.7622935575  | -1.8371600081 | 0.4859912036  |
| H | 0.4600028267  | -3.0157577919 | -0.7734243013 |
| C | -1.0615382568 | -2.9559537884 | 0.7790902781  |
| H | -0.5529371059 | -3.7438092054 | 1.3526097499  |
| C | -2.269005632  | -3.5627428396 | 0.0475471239  |
| H | -1.4248172007 | -2.2229709044 | 1.5108062876  |
| H | -2.8302779493 | -2.7591458628 | -0.4463072083 |
| H | -2.9488818962 | -3.9972839772 | 0.7913651768  |
| C | -1.898749153  | -4.6332399425 | -0.9845986626 |



|   |               |               |               |
|---|---------------|---------------|---------------|
| H | -1.3100008405 | -5.4364172818 | -0.5259397844 |
| H | -1.3032370591 | -4.2155036586 | -1.8032320164 |
| H | -2.7928736863 | -5.0851547502 | -1.4262892456 |
| C | -2.4365833803 | 2.2280513648  | -0.4891213283 |
| H | -3.1177587059 | 0.2321741052  | -0.8819756496 |
| H | -2.0428915721 | 0.8535479821  | -2.1151962874 |
| H | -1.6156757069 | 2.8945193695  | -0.7771114471 |
| C | -2.6365234172 | 2.3057962727  | 1.0293005153  |
| H | -3.3326368467 | 2.6276655772  | -0.9830873758 |
| C | -2.9930780794 | 3.7171424633  | 1.5049188914  |
| H | -1.7234355114 | 1.9747864333  | 1.5396944106  |
| H | -3.4255758873 | 1.6021297132  | 1.3285506741  |
| H | -3.1242913955 | 3.7556169152  | 2.5911623087  |
| H | -3.9233917211 | 4.0665286945  | 1.0427322191  |
| H | -2.2054966368 | 4.4316507879  | 1.2385935582  |
| C | 2.6865229376  | 0.9600557178  | 0.8822742142  |
| C | 3.2824947713  | 2.3867677611  | 0.8802670702  |
| H | 2.497823833   | 3.1483191988  | 0.8487897198  |
| H | 3.8823736432  | 2.5575234631  | 1.7817868407  |
| H | 3.927086011   | 2.5363945721  | 0.0078502405  |
| C | 1.7925816646  | 0.7845790863  | 2.13195111    |
| H | 1.3616646356  | -0.2213439799 | 2.1662522997  |
| H | 2.3792889863  | 0.933612281   | 3.0456225482  |
| H | 0.9675250501  | 1.502708603   | 2.1491336213  |
| C | 3.85014573    | -0.0427997083 | 0.9859797866  |
| H | 4.4368105551  | 0.1633015936  | 1.8871657779  |
| H | 3.4925720776  | -1.07540319   | 1.0542016822  |
| H | 4.5252022563  | 0.0305556584  | 0.1271245948  |
| H | 4.5252022563  | 0.0305556584  | 0.1271245948  |

TS exo 0458

E(RB3LYP) = -706.412095519 A.U.

First frequency = -490.5087 cm<sup>-1</sup>

|   |               |               |               |
|---|---------------|---------------|---------------|
| H | 0.7270150786  | -0.8643882397 | -3.0774162587 |
| C | 0.6997126192  | -0.1352433339 | -2.2717665701 |
| H | -0.0525954238 | 0.6357377008  | -2.3961756904 |
| C | 1.8432518213  | 0.0801676434  | -1.5197085141 |

|   |               |               |               |
|---|---------------|---------------|---------------|
| C | 1.8505721671  | 0.8995269801  | -0.367916464  |
| C | 0.6931520353  | 1.5979587751  | -0.0566345551 |
| H | 0.6281545503  | 2.1682246232  | 0.8635901639  |
| H | 0.0303564482  | 1.9427881725  | -0.8394146871 |
| C | -0.9690159636 | -0.0308716796 | 0.1655152097  |
| H | -0.6136268371 | -0.1334173058 | 1.1877901448  |
| C | -2.2064284708 | 0.8202480369  | -0.0375525015 |
| C | -0.6497676762 | -1.041209918  | -0.7376085336 |
| H | -1.3560445801 | -1.2210360393 | -1.5465124581 |
| C | 0.1770214353  | -2.2266129449 | -0.2911065356 |
| H | 2.6820820978  | -0.5842665624 | -1.6951965707 |
| H | 1.0827047592  | -1.8544832085 | 0.2029485816  |
| H | 0.5198854909  | -2.7929308712 | -1.1640192957 |
| C | -0.5659101591 | -3.1645801929 | 0.6830579897  |
| H | 0.100683177   | -3.9983367414 | 0.9452743279  |
| C | -1.892379021  | -3.7271169354 | 0.1489211727  |
| H | -0.7640655684 | -2.6192646109 | 1.6146049045  |
| H | -2.5916298839 | -2.8981703896 | -0.020027207  |
| H | -2.3461019939 | -4.3551329726 | 0.9261258397  |
| C | -1.7494746793 | -4.5433643636 | -1.1401504904 |
| H | -1.0325212575 | -5.362718072  | -1.0108504808 |
| H | -1.3956814337 | -3.9253168771 | -1.9721341735 |
| H | -2.7066975143 | -4.9817340348 | -1.4406912761 |
| C | -2.4312863131 | 1.8980490113  | 1.0306701589  |
| H | -3.0895057918 | 0.1622415627  | -0.0500602896 |
| H | -2.1731868437 | 1.2765333189  | -1.037230898  |
| H | -2.3737687797 | 1.4242232838  | 2.0199727364  |
| C | -3.774692568  | 2.6317525525  | 0.9035472913  |
| H | -1.6187721873 | 2.633407541   | 0.9960232227  |
| C | -3.9130334799 | 3.4583885202  | -0.3803215177 |
| H | -3.8981652994 | 3.293662975   | 1.7700296489  |
| H | -4.5934886637 | 1.9011733666  | 0.9588335036  |
| H | -3.8936644397 | 2.8271609355  | -1.2745162153 |
| H | -3.0948182518 | 4.1827970798  | -0.4693012855 |
| H | -4.8550486982 | 4.0160837807  | -0.3932117683 |
| C | 3.0195498575  | 0.8831001688  | 0.6410192732  |
| C | 4.178090203   | -0.0266337893 | 0.1927818705  |
| H | 3.8679891846  | -1.0740792888 | 0.1188474942  |

|   |              |               |               |
|---|--------------|---------------|---------------|
| H | 4.5824300576 | 0.2808640453  | -0.7770962662 |
| H | 4.9925629577 | 0.0254482304  | 0.9226743467  |
| C | 3.5716456071 | 2.3190940353  | 0.7967567615  |
| H | 2.8007308628 | 3.0074326368  | 1.1552511626  |
| H | 4.401909421  | 2.3397731806  | 1.5123013313  |
| H | 3.9380130894 | 2.6996337292  | -0.1624055847 |
| C | 2.5216327473 | 0.378812431   | 2.015245988   |
| H | 3.3414397142 | 0.3815079201  | 2.7427008725  |
| H | 1.7218544255 | 1.0074243939  | 2.4169478254  |
| H | 2.1380687913 | -0.6439811456 | 1.9413395848  |
| H | 2.1380687913 | -0.6439811456 | 1.9413395848  |

TS exo 0464

E(RB3LYP) = -706.413395606 A.U.

First frequency = -504.4008 cm<sup>-1</sup>

|   |               |               |               |
|---|---------------|---------------|---------------|
| H | 0.2614156526  | -1.1597199526 | -2.902818151  |
| C | 0.3268694274  | -0.3694948717 | -2.1604695683 |
| H | -0.2726675019 | 0.5032610743  | -2.3922396041 |
| C | 1.4504025438  | -0.2909433809 | -1.3542475989 |
| C | 1.5537529182  | 0.62773802    | -0.2856902196 |
| C | 0.5381674566  | 1.5645980577  | -0.13604778   |
| H | 0.5362178118  | 2.237009488   | 0.7152811139  |
| H | 0.0271677893  | 1.9554314392  | -1.0064462333 |
| C | -1.4185538108 | 0.3642478998  | 0.0975576439  |
| H | -1.1974989173 | 0.3722834961  | 1.1621385654  |
| C | -2.435684589  | 1.3795872357  | -0.3837683211 |
| C | -1.2350738121 | -0.8351334552 | -0.5858451979 |
| H | -1.9008932209 | -1.0547314126 | -1.4189419455 |
| C | -0.6334696472 | -2.0163344177 | 0.1389678346  |
| H | 2.1587941567  | -1.1102121606 | -1.4137548011 |
| H | -1.26602435   | -2.2603372331 | 1.0063273136  |
| H | 0.3335410397  | -1.7061236053 | 0.5590214232  |
| C | -0.4419182335 | -3.2794018409 | -0.7028341312 |
| H | -1.4074901318 | -3.5845971846 | -1.1311576075 |
| C | 0.1527664601  | -4.4448820181 | 0.0947354526  |
| H | 0.2126391106  | -3.0558872446 | -1.5536233885 |
| H | -0.4991664851 | -4.6725595094 | 0.9491241199  |

|   |               |               |               |
|---|---------------|---------------|---------------|
| H | 1.1148632741  | -4.130877797  | 0.5231422175  |
| C | 0.3545240017  | -5.7064835396 | -0.749042554  |
| H | 0.7830550507  | -6.5229440073 | -0.1586942923 |
| H | 1.0294178643  | -5.5129422111 | -1.5907611803 |
| H | -0.5967283746 | -6.0583847189 | -1.1645924476 |
| C | -2.5526630437 | 2.6373437788  | 0.4840989235  |
| H | -3.4241131141 | 0.8973652284  | -0.4284896841 |
| H | -2.2109690961 | 1.6691877178  | -1.4220651547 |
| H | -2.7489105401 | 2.338234863   | 1.5236678024  |
| C | -3.6558548432 | 3.5920273201  | 0.0152552534  |
| H | -1.5963917049 | 3.173653564   | 0.498160696   |
| C | -3.7692413209 | 4.8467680113  | 0.8856331862  |
| H | -4.6170671285 | 3.0602025314  | 0.0077720808  |
| H | -3.4621541565 | 3.8828601494  | -1.0263888782 |
| H | -2.831312973  | 5.4138949311  | 0.8830412437  |
| H | -3.9926067724 | 4.5850695735  | 1.9262819522  |
| H | -4.5626962785 | 5.5127800205  | 0.5314453768  |
| C | 2.6498104993  | 0.5107545744  | 0.7953295704  |
| C | 3.5867068512  | -0.689026556  | 0.5632830137  |
| H | 4.1001405538  | -0.6230737896 | -0.4013384172 |
| H | 4.3539788545  | -0.7157921585 | 1.3439247299  |
| H | 3.0445066068  | -1.6400006875 | 0.5988149842  |
| C | 3.504148553   | 1.7998968946  | 0.778073921   |
| H | 4.2936821747  | 1.7537888393  | 1.5373466019  |
| H | 3.9778193775  | 1.9381882156  | -0.1994469942 |
| H | 2.8919430076  | 2.6840348929  | 0.9794665483  |
| C | 2.0094842963  | 0.3483485868  | 2.1931222205  |
| H | 1.357629031   | 1.1887005882  | 2.4476196688  |
| H | 1.4123446344  | -0.5673064583 | 2.2476784821  |
| H | 2.7877461384  | 0.2913568295  | 2.962627265   |
| H | 2.7877461384  | 0.2913568295  | 2.962627265   |

TS<sub>exo</sub> 0469

E(RB3LYP) = -706.410708156 A.U.

First frequency = -524.5676 cm<sup>-1</sup>

|   |              |               |               |
|---|--------------|---------------|---------------|
| H | 0.0721720632 | -0.0000250822 | -2.9743921397 |
| C | 0.3800258191 | 0.5660013447  | -2.0990266832 |

|   |               |               |               |
|---|---------------|---------------|---------------|
| H | -0.1038778817 | 1.5305788668  | -2.0041621656 |
| C | 1.6377616685  | 0.3429448646  | -1.5585372003 |
| C | 2.0524880872  | 0.9186450658  | -0.3375029283 |
| C | 1.1703993176  | 1.786112133   | 0.2935018295  |
| H | 1.3838495764  | 2.1889916513  | 1.2763522798  |
| H | 0.5127820612  | 2.4094281755  | -0.2995431599 |
| C | -0.7173733877 | 0.5989786575  | 0.6685202672  |
| H | -0.2020774247 | 0.089488692   | 1.4803840247  |
| C | -1.6114309167 | 1.7393989873  | 1.1357883312  |
| C | -0.9515636073 | -0.1674686899 | -0.4790504176 |
| H | -1.805990655  | 0.0900748725  | -1.0981959086 |
| C | -0.5696352439 | -1.6327860641 | -0.48099972   |
| H | 2.2174519306  | -0.4839901245 | -1.961624945  |
| H | 0.4515135398  | -1.7344404099 | -0.0939590517 |
| H | -0.5493697774 | -2.0213409029 | -1.5066351829 |
| C | -1.5167790367 | -2.4986506895 | 0.3671224739  |
| H | -1.528156123  | -2.1174118338 | 1.3972916887  |
| C | -1.1309184063 | -3.9820009179 | 0.3733055491  |
| H | -2.545056178  | -2.3890733072 | -0.0062905695 |
| H | -0.1011267062 | -4.0836493292 | 0.7426667907  |
| H | -1.1206292681 | -4.357831702  | -0.6589808042 |
| C | -2.0700856229 | -4.8416837429 | 1.2240861147  |
| H | -2.0738568316 | -4.5057862508 | 2.2674159312  |
| H | -1.7732812131 | -5.8956380441 | 1.2139475877  |
| H | -3.1006523611 | -4.7813846091 | 0.8557493305  |
| C | -2.4651267853 | 2.4319893316  | 0.055078421   |
| H | -1.0004977853 | 2.4901113286  | 1.6507754509  |
| H | -2.2864060093 | 1.3432827777  | 1.9104397484  |
| H | -2.6347202461 | 3.4771006078  | 0.3432518464  |
| C | -3.8325287182 | 1.7727951197  | -0.1808896271 |
| H | -1.9093044059 | 2.4744987762  | -0.8911852245 |
| C | -4.6048026734 | 2.4053061777  | -1.341134558  |
| H | -4.4218688912 | 1.8501874504  | 0.7427313196  |
| H | -3.7041907858 | 0.6993100967  | -0.3624331543 |
| H | -5.5873559499 | 1.9407881484  | -1.4730739447 |
| H | -4.0554133359 | 2.2978118758  | -2.2836667751 |
| H | -4.7618173634 | 3.4771122361  | -1.1731456712 |
| C | 3.3299894732  | 0.3892966067  | 0.3452612451  |

|   |              |               |               |
|---|--------------|---------------|---------------|
| C | 3.6457735989 | 1.1396608232  | 1.6523256303  |
| H | 3.7520752887 | 2.215842754   | 1.4822976495  |
| H | 2.8666465792 | 0.987985914   | 2.4065653462  |
| H | 4.586309063  | 0.7713266538  | 2.0751402172  |
| C | 3.1811581564 | -1.1130658102 | 0.681926365   |
| H | 2.3479836812 | -1.2745795189 | 1.3740748787  |
| H | 2.994562034  | -1.7130872336 | -0.2131653738 |
| H | 4.0931228748 | -1.4943812407 | 1.1559949677  |
| C | 4.5250383411 | 0.5801397556  | -0.6165433711 |
| H | 5.4489280943 | 0.2108591192  | -0.156695968  |
| H | 4.3820498996 | 0.0391098677  | -1.5562821106 |
| H | 4.6629597021 | 1.6388273279  | -0.8588863868 |
| H | 4.6629597021 | 1.6388273279  | -0.8588863868 |

TS exo 0473

E(RB3LYP) = -706.411691220 A.U.

First frequency = -505.9293 cm<sup>-1</sup>

|   |               |               |               |
|---|---------------|---------------|---------------|
| H | 0.600128226   | 0.2164717336  | -3.29168199   |
| C | 0.6215731634  | 0.6541054134  | -2.2971285708 |
| H | -0.1097254625 | 1.4362329371  | -2.1393713424 |
| C | 1.7903846528  | 0.5898794882  | -1.5558963536 |
| C | 1.8557335695  | 0.992835848   | -0.2039725407 |
| C | 0.711174212   | 1.5397700978  | 0.3629667586  |
| H | 0.6759008582  | 1.770647999   | 1.4233493083  |
| H | 0.0367893069  | 2.1366035373  | -0.2368903159 |
| C | -0.8811804559 | -0.064310305  | 0.1774194759  |
| H | -0.3984889135 | -0.5523684287 | 1.0193433741  |
| C | -2.096215191  | 0.7646635583  | 0.5601422644  |
| C | -0.7288342894 | -0.6839039895 | -1.0640909513 |
| H | -1.5049434078 | -0.5325653583 | -1.810926652  |
| C | 0.0359146891  | -1.9854575318 | -1.1839154048 |
| H | 2.6022281166  | -0.0021147712 | -1.9642731333 |
| H | 0.9124241855  | -1.9441790595 | -0.5241508695 |
| H | 0.4260970565  | -2.098944847  | -2.2015287066 |
| C | -0.7983428772 | -3.2392270217 | -0.8453628247 |
| H | -1.6752229002 | -3.2774646014 | -1.5075565203 |
| C | -1.2652644849 | -3.3434562045 | 0.6108840358  |

|   |               |               |               |
|---|---------------|---------------|---------------|
| H | -0.1977939501 | -4.1273019655 | -1.0884855144 |
| H | -1.9198601988 | -2.4970245613 | 0.8479164927  |
| H | -0.3953771199 | -3.250819021  | 1.2762598256  |
| C | -1.9995996591 | -4.6555713368 | 0.9020564726  |
| H | -1.3554590967 | -5.5214895518 | 0.7102654737  |
| H | -2.8864660138 | -4.7589365526 | 0.2660568173  |
| H | -2.3297704561 | -4.7097206953 | 1.9446939744  |
| C | -2.7544752793 | 1.5671259044  | -0.570696159  |
| H | -1.8226589073 | 1.442549452   | 1.3767535312  |
| H | -2.8548307066 | 0.0880072116  | 0.9857169264  |
| H | -2.0147456868 | 2.2306605265  | -1.0386688494 |
| C | -3.9564384275 | 2.4091053697  | -0.113186607  |
| H | -3.0871162796 | 0.8794058651  | -1.3571809312 |
| C | -3.5922634158 | 3.5676002043  | 0.8227829051  |
| H | -4.6887418803 | 1.7544459884  | 0.3790689429  |
| H | -4.4589616652 | 2.8141245169  | -1.0005511589 |
| H | -4.4726256135 | 4.1720716896  | 1.0639575289  |
| H | -2.8513795095 | 4.2279161108  | 0.3568722013  |
| H | -3.1698804857 | 3.2130509837  | 1.7681689058  |
| C | 3.0535855923  | 0.6331532484  | 0.70016421    |
| C | 4.1981044675  | -0.0459458022 | -0.0742591689 |
| H | 5.0402686139  | -0.2335913594 | 0.5998299883  |
| H | 3.8911667333  | -1.0096399924 | -0.4933214154 |
| H | 4.5613816376  | 0.5839949234  | -0.8927714866 |
| C | 3.6111403951  | 1.9256706585  | 1.3399961192  |
| H | 3.9510757467  | 2.6244140708  | 0.5684953858  |
| H | 2.8520862105  | 2.4359723974  | 1.9400082848  |
| H | 4.4610886643  | 1.6986551388  | 1.994076763   |
| C | 2.5952462529  | -0.3308341563 | 1.8188878711  |
| H | 1.8095247573  | 0.1083962214  | 2.4403906359  |
| H | 2.2062030123  | -1.2630167802 | 1.3962020683  |
| H | 3.4357660207  | -0.5815695994 | 2.4761567633  |
| H | 3.4357660207  | -0.5815695994 | 2.4761567633  |

TS exo 0474

E(RB3LYP) = -706.411641186 A.U.

First frequency = -504.3495  $\text{cm}^{-1}$

|   |               |               |               |
|---|---------------|---------------|---------------|
| H | 0.6695411499  | 0.2549422255  | -3.2849071139 |
| C | 0.7354684096  | 0.6984738632  | -2.2949854158 |
| H | 0.062176241   | 1.5303603478  | -2.1341070377 |
| C | 1.905939999   | 0.5583034183  | -1.5676799093 |
| C | 2.017165145   | 0.966721357   | -0.2202417581 |
| C | 0.9197774985  | 1.5934824628  | 0.3572865364  |
| H | 0.9154173178  | 1.8351980898  | 1.4158220653  |
| H | 0.2783510451  | 2.229273565   | -0.2389613651 |
| C | -0.7760675233 | 0.1002829291  | 0.213346945   |
| H | -0.3114089414 | -0.4180732192 | 1.047338916   |
| C | -1.9296027655 | 1.0042795993  | 0.6156449365  |
| C | -0.6922739354 | -0.5322495488 | -1.0282734896 |
| H | -1.4691900594 | -0.3262400731 | -1.7610322489 |
| C | -0.0261561466 | -1.8861013073 | -1.1567463739 |
| H | 2.6696791079  | -0.0913575005 | -1.9811862155 |
| H | 0.8617967511  | -1.9072151785 | -0.5114806414 |
| H | 0.3375564731  | -2.0304939232 | -2.1802108731 |
| C | -0.9441550925 | -3.0746489168 | -0.7997737511 |
| H | -1.8316129905 | -3.0509676517 | -1.4484163045 |
| C | -1.3950268846 | -3.1392506578 | 0.6637770236  |
| H | -0.4138674641 | -4.0050698503 | -1.0478922586 |
| H | -1.9814199683 | -2.2457989959 | 0.9067710415  |
| H | -0.5106270276 | -3.1091433674 | 1.315628153   |
| C | -2.2200753386 | -4.3922885965 | 0.9717855077  |
| H | -3.1219346782 | -4.431509298  | 0.3498507858  |
| H | -2.5370914136 | -4.4184888726 | 2.0195707889  |
| H | -1.6449925302 | -5.3042306424 | 0.7739161159  |
| C | -2.5679141811 | 1.8283124576  | -0.5111689527 |
| H | -1.6016024794 | 1.6895903264  | 1.4087870635  |
| H | -2.7025143461 | 0.3730897498  | 1.0783923927  |
| H | -1.7866314002 | 2.3859753108  | -1.0425919791 |
| C | -3.6351436181 | 2.8206723466  | -0.0233828093 |
| H | -3.0200067868 | 1.1564056305  | -1.2522733961 |
| C | -4.8662814282 | 2.158338827   | 0.605956732   |
| H | -3.955918999  | 3.4366821353  | -0.8729689216 |
| H | -3.1808824463 | 3.5116809453  | 0.6999287247  |
| H | -4.6122186304 | 1.6106656528  | 1.5189658313  |
| H | -5.3265044805 | 1.4466707026  | -0.0895815471 |



|   |              |               |               |
|---|--------------|---------------|---------------|
| H | -5.623667152 | 2.9033661801  | 0.8703273716  |
| C | 3.1999205531 | 0.5326562285  | 0.6710957185  |
| C | 4.2898817573 | -0.2187841578 | -0.1152624868 |
| H | 5.1272377529 | -0.4568411719 | 0.5488256735  |
| H | 3.9183034396 | -1.1626435906 | -0.5269927998 |
| H | 4.6811341642 | 0.3850464762  | -0.9405557438 |
| C | 3.8466660066 | 1.7873226507  | 1.3022049173  |
| H | 4.2217043241 | 2.4620502242  | 0.5256176223  |
| H | 3.1293765372 | 2.3459929845  | 1.9103963372  |
| H | 4.6879192869 | 1.5067084411  | 1.9466338972  |
| C | 2.6934326885 | -0.3989383803 | 1.7964552045  |
| H | 3.5235097899 | -0.7031624884 | 2.4443721432  |
| H | 1.944966281  | 0.0907519407  | 2.4261946984  |
| H | 2.2399310008 | -1.3042384862 | 1.3795794376  |
| H | 2.2399310008 | -1.3042384862 | 1.3795794376  |

TS exo 0475

E(RB3LYP) = -706.412501539 A.U.

First frequency = -492.7790  $\text{cm}^{-1}$

|   |               |               |               |
|---|---------------|---------------|---------------|
| H | 0.884910627   | -1.57705159   | -2.6604613009 |
| C | 1.0012730643  | -0.6326742571 | -2.1366051496 |
| H | 0.4800960949  | 0.1992400228  | -2.5946544692 |
| C | 2.0929489971  | -0.4481365535 | -1.3075210412 |
| C | 2.244146088   | 0.6905439667  | -0.4831059198 |
| C | 1.3022170055  | 1.7072083939  | -0.6094694887 |
| H | 1.3273220013  | 2.5665684233  | 0.0539190843  |
| H | 0.8685197148  | 1.9184777412  | -1.5786740125 |
| C | -0.6904263837 | 0.8000944936  | -0.1338570115 |
| H | -0.4775127111 | 0.98797624    | 0.9151867367  |
| C | -1.5875568417 | 1.8087616861  | -0.8232103472 |
| C | -0.6828821706 | -0.5298199445 | -0.5467752623 |
| H | -1.3336850341 | -0.8126101815 | -1.3689399698 |
| C | -0.2585139259 | -1.618433653  | 0.4141551346  |
| H | 2.7295198618  | -1.3087332506 | -1.131862603  |
| H | -0.7778444411 | -1.4793841486 | 1.3746393722  |
| H | 0.8063657984  | -1.4708357899 | 0.6398180429  |
| C | -0.4969711405 | -3.0566968487 | -0.07802836   |

|   |               |               |               |
|---|---------------|---------------|---------------|
| H | -0.2958511356 | -3.105847764  | -1.1562398658 |
| C | -1.9040642034 | -3.6075625768 | 0.2122964473  |
| H | 0.2318637262  | -3.7248351806 | 0.3968926317  |
| H | -2.0481764401 | -3.645859592  | 1.3009230478  |
| H | -1.9517824381 | -4.6474088183 | -0.1363498122 |
| C | -3.0572625414 | -2.8155335684 | -0.4142847336 |
| H | -4.0201192331 | -3.2942114786 | -0.2069557062 |
| H | -2.9467479097 | -2.7478904106 | -1.5029800984 |
| H | -3.1034996467 | -1.7944405674 | -0.0227075706 |
| C | -3.0860169577 | 1.5989580945  | -0.5259375718 |
| H | -1.4370688431 | 1.7446349765  | -1.9099414908 |
| H | -1.3007979471 | 2.8271462282  | -0.5319435766 |
| H | -3.6696022804 | 2.3392559667  | -1.0909472414 |
| C | -3.4499285623 | 1.6982990162  | 0.959580659   |
| H | -3.3885290913 | 0.6127843086  | -0.9032191034 |
| C | -4.9472317648 | 1.5053762177  | 1.2151809499  |
| H | -3.129018274  | 2.6753035043  | 1.3471356486  |
| H | -2.8838875811 | 0.9452735442  | 1.522028445   |
| H | -5.1873152655 | 1.5779808123  | 2.2809746478  |
| H | -5.2803087517 | 0.5217007863  | 0.8643592088  |
| H | -5.5397897856 | 2.2611096648  | 0.6868008212  |
| C | 3.2746102841  | 0.7444307639  | 0.6640004568  |
| C | 2.5447745336  | 0.8849439443  | 2.0199065764  |
| H | 3.2700688412  | 0.9407499007  | 2.8397157973  |
| H | 1.930057289   | 1.7887202078  | 2.0623292814  |
| H | 1.8909296502  | 0.0261702012  | 2.2021500387  |
| C | 4.157910643   | -0.5149550818 | 0.7281982275  |
| H | 4.8920959918  | -0.4110257529 | 1.5337761334  |
| H | 3.5689982065  | -1.4151109012 | 0.9328924108  |
| H | 4.7096018531  | -0.6706921802 | -0.2045589287 |
| C | 4.1982812822  | 1.9671109488  | 0.4553944557  |
| H | 4.9387984554  | 2.0357552468  | 1.2608417604  |
| H | 4.7348225355  | 1.8899611099  | -0.4960245441 |
| H | 3.628352189   | 2.9007767382  | 0.4414708236  |
| H | 3.628352189   | 2.9007767382  | 0.4414708236  |

TS exo 0476

E(RB3LYP) = -706.412502972 A.U.

First frequency =  $-510.8199 \text{ cm}^{-1}$

|   |               |               |               |
|---|---------------|---------------|---------------|
| H | 0.4689590086  | -1.1111945544 | -2.8878688619 |
| C | 0.6851800305  | -0.2778993214 | -2.2260203308 |
| H | 0.4206943412  | 0.6891034434  | -2.638834836  |
| C | 1.6925988002  | -0.40537543   | -1.2826264905 |
| C | 1.9577530766  | 0.5871389008  | -0.3119137607 |
| C | 1.2321912945  | 1.7694826576  | -0.3891558127 |
| H | 1.3169897358  | 2.5344256591  | 0.3734844115  |
| H | 0.9369106692  | 2.151298219   | -1.3578019871 |
| C | -0.9652844129 | 1.1775124601  | -0.28357583   |
| H | -0.8396585097 | 1.1703591191  | 0.7947949423  |
| C | -1.5640639156 | 2.4308725383  | -0.8843448787 |
| C | -1.1162530899 | -0.0590067859 | -0.9138811893 |
| H | -1.7221310479 | -0.0898842643 | -1.8189148701 |
| C | -1.0863476814 | -1.3190725359 | -0.0785649647 |
| H | 2.1326784952  | -1.390922502  | -1.1490891998 |
| H | -1.9244905283 | -1.282524112  | 0.6358174182  |
| H | -0.1765482885 | -1.2987520174 | 0.5308532668  |
| C | -1.1740132057 | -2.6353892352 | -0.8568158352 |
| H | -2.0488425607 | -2.598843063  | -1.5204522338 |
| C | -1.272131742  | -3.8791045169 | 0.0394482885  |
| H | -0.2977298676 | -2.7354588418 | -1.5082264118 |
| H | -1.4462370452 | -4.7586245923 | -0.593357417  |
| H | -2.153857431  | -3.7914347975 | 0.689120851   |
| C | -0.0259935525 | -4.1212101733 | 0.8998470987  |
| H | 0.8722784656  | -4.1914647324 | 0.274592794   |
| H | -0.1099590062 | -5.0533490252 | 1.4680153763  |
| H | 0.136783397   | -3.3113674692 | 1.6175799092  |
| C | -3.1054507027 | 2.5239895487  | -0.8345547031 |
| H | -1.2631336595 | 2.4939678415  | -1.9404341257 |
| H | -1.1423699701 | 3.3179610127  | -0.3947989759 |
| H | -3.3959717077 | 3.4140247579  | -1.4085783213 |
| C | -3.7357055635 | 2.622438473   | 0.5666484454  |
| H | -3.5351681859 | 1.6633917108  | -1.3646603961 |
| C | -3.8587508754 | 1.2955228187  | 1.3270754148  |
| H | -4.7414132857 | 3.0489541096  | 0.4598245673  |
| H | -3.1670084725 | 3.3447122171  | 1.1688930216  |

|   |               |               |               |
|---|---------------|---------------|---------------|
| H | -4.4032733437 | 1.4327310341  | 2.2675610736  |
| H | -2.8845388649 | 0.8635154242  | 1.5661542054  |
| H | -4.4049416552 | 0.5558895091  | 0.7302541001  |
| C | 2.8916199632  | 0.2537168155  | 0.8700212045  |
| C | 4.2870869222  | -0.0999051138 | 0.3045245368  |
| H | 4.2470065542  | -0.9671670751 | -0.3608688801 |
| H | 4.6989402936  | 0.7391522874  | -0.2654071575 |
| H | 4.9820084764  | -0.3353079126 | 1.1189003713  |
| C | 3.0546252558  | 1.4411181778  | 1.8364047578  |
| H | 3.7543987227  | 1.1767060023  | 2.6360423212  |
| H | 3.4481110142  | 2.3255946724  | 1.3254541045  |
| H | 2.1045330867  | 1.712931219   | 2.308274451   |
| C | 2.3557368984  | -0.9486168766 | 1.6812544201  |
| H | 1.3844736961  | -0.7127338855 | 2.1286489792  |
| H | 2.2312454061  | -1.8389467679 | 1.0591463249  |
| H | 3.0467866423  | -1.2031088936 | 2.4932433338  |
| H | 3.0467866423  | -1.2031088936 | 2.4932433338  |

TS exo 0477

E(RB3LYP) = -706.413219706 A.U.

First frequency = -504.0773  $\text{cm}^{-1}$

|   |               |               |               |
|---|---------------|---------------|---------------|
| H | 1.3606092554  | -0.5919084479 | -3.3137350585 |
| C | 1.207470138   | 0.1182208694  | -2.5051643604 |
| H | 0.7474639322  | 1.0496718641  | -2.8165636118 |
| C | 2.0368672507  | 0.0642599099  | -1.395326067  |
| C | 1.8155448359  | 0.8512620616  | -0.2416703347 |
| C | 0.7862519059  | 1.7789848721  | -0.2778822684 |
| H | 0.5174941917  | 2.3523878532  | 0.5992978438  |
| H | 0.5147829381  | 2.2496121225  | -1.2139838826 |
| C | -1.1223984378 | 0.5391147775  | -0.7471214304 |
| H | -1.1318040414 | 0.2679823085  | 0.3041075288  |
| C | -2.0724747984 | 1.6413688065  | -1.1712976703 |
| C | -0.7463404281 | -0.4567959053 | -1.6496933737 |
| H | -1.178120599  | -0.4027972647 | -2.6491532318 |
| C | -0.4265157573 | -1.8445680389 | -1.1391110609 |
| H | 2.7256851619  | -0.7738923224 | -1.3241102259 |
| H | 0.2777303301  | -1.7473370833 | -0.307469729  |

|   |               |               |               |
|---|---------------|---------------|---------------|
| H | 0.0885284704  | -2.4292723839 | -1.9118208691 |
| C | -1.6741820669 | -2.6155937802 | -0.6714349436 |
| H | -2.1826393939 | -2.033359125  | 0.1095615346  |
| C | -1.3705938903 | -4.0247584717 | -0.1391763091 |
| H | -2.3835202142 | -2.6870539015 | -1.5067961904 |
| H | -0.8581230013 | -4.6040922301 | -0.919629983  |
| H | -2.3187960105 | -4.5435260259 | 0.0515863953  |
| C | -0.5281578959 | -4.0357286911 | 1.1423671017  |
| H | -0.3942786707 | -5.0544289776 | 1.5207434575  |
| H | -1.0111528442 | -3.4475542159 | 1.9318411223  |
| H | 0.4677376845  | -3.6116880781 | 0.9801994843  |
| C | -2.2815334273 | 2.8009382245  | -0.1798670385 |
| H | -3.051260547  | 1.1826617281  | -1.374608582  |
| H | -1.7438015662 | 2.0509823646  | -2.137139124  |
| H | -1.392106841  | 3.4396700261  | -0.1577096649 |
| C | -2.6233123351 | 2.3756527374  | 1.2576980331  |
| H | -3.0956840757 | 3.4296666146  | -0.5647474946 |
| C | -3.8475436477 | 1.4597481094  | 1.3633535925  |
| H | -2.7926748828 | 3.2799403307  | 1.8556812782  |
| H | -1.7559441267 | 1.8780200781  | 1.7100871109  |
| H | -4.095061418  | 1.2481976862  | 2.4085672943  |
| H | -3.675318311  | 0.500344839   | 0.8644505787  |
| H | -4.7266474873 | 1.9213234422  | 0.8986029369  |
| C | 2.5824259405  | 0.5150433283  | 1.0543600618  |
| C | 2.2743289435  | -0.9293396968 | 1.5140373714  |
| H | 2.5403075729  | -1.6651243379 | 0.7497521954  |
| H | 2.8386943327  | -1.1728548601 | 2.4216291898  |
| H | 1.2092134056  | -1.047911388  | 1.7385159429  |
| C | 4.0982046182  | 0.6494939764  | 0.781395912   |
| H | 4.4311047844  | -0.0312892001 | -0.0073454968 |
| H | 4.3471311788  | 1.6688607947  | 0.4692269892  |
| H | 4.6723054012  | 0.4182741513  | 1.6860434686  |
| C | 2.218967922   | 1.4650472485  | 2.2104224088  |
| H | 1.1637667711  | 1.3783823726  | 2.4904285774  |
| H | 2.8142466661  | 1.2183424885  | 3.0957137955  |
| H | 2.419364884   | 2.5096500728  | 1.9518680427  |
| H | 2.419364884   | 2.5096500728  | 1.9518680427  |

TS exo 0484

E(RB3LYP) = -706.412528505 A.U.

First frequency = -511.2691 cm<sup>-1</sup>

|   |               |               |               |
|---|---------------|---------------|---------------|
| H | 0.1947396538  | -1.4843261931 | -2.4790666867 |
| C | 0.5056545303  | -0.5764982584 | -1.9713942009 |
| H | 0.0998196854  | 0.333348331   | -2.3959183336 |
| C | 1.6829535849  | -0.5834333371 | -1.2415688989 |
| C | 2.0878552527  | 0.5034795611  | -0.4372606495 |
| C | 1.3209548915  | 1.6639135788  | -0.4967713947 |
| H | 1.5339869836  | 2.500361423   | 0.1623766991  |
| H | 0.8693787973  | 1.9549363514  | -1.4370376163 |
| C | -0.7455179656 | 1.1144817989  | 0.1230960597  |
| H | -0.4420639529 | 1.2766939085  | 1.155577252   |
| C | -1.5132190138 | 2.260425464   | -0.5037712696 |
| C | -0.9911691322 | -0.2072457698 | -0.2567131533 |
| H | -1.7540398277 | -0.3781539711 | -1.0121379964 |
| C | -0.7304962661 | -1.3372297196 | 0.7205511507  |
| H | 2.185455936   | -1.5372690985 | -1.1222405102 |
| H | -0.8678145256 | -0.9577974688 | 1.7419038335  |
| H | 0.3233140609  | -1.6426889738 | 0.6698738239  |
| C | -1.6534138404 | -2.5550902596 | 0.5386977087  |
| H | -1.5031678508 | -3.2383896421 | 1.3855622242  |
| C | -1.4691939395 | -3.34566916   | -0.766240158  |
| H | -2.6950242104 | -2.2123164437 | 0.6037718259  |
| H | -1.617877975  | -2.6809899434 | -1.6257174256 |
| H | -2.2627711193 | -4.1011818497 | -0.8298136096 |
| C | -0.1086031884 | -4.0403039674 | -0.8810155331 |
| H | 0.7133604668  | -3.3190236344 | -0.8693261962 |
| H | -0.0319009269 | -4.6149364673 | -1.8099232196 |
| H | 0.0484157862  | -4.7329289689 | -0.0459481035 |
| C | -2.8511384586 | 2.565291015   | 0.2032756514  |
| H | -1.7076505934 | 2.0324643471  | -1.5616117362 |
| H | -0.9092511577 | 3.1758847322  | -0.4919050798 |
| H | -2.6513231345 | 2.7986087641  | 1.2588289157  |
| C | -3.89706506   | 1.4480169529  | 0.1250104072  |
| H | -3.2737634038 | 3.4802895989  | -0.2347425239 |
| C | -5.2222610424 | 1.8328272358  | 0.789136891   |

|   |               |               |               |
|---|---------------|---------------|---------------|
| H | -3.4991627267 | 0.5413884905  | 0.595130274   |
| H | -4.0722519524 | 1.1912399705  | -0.9291737051 |
| H | -5.9543630562 | 1.0211592948  | 0.7254262007  |
| H | -5.6622227638 | 2.7174885165  | 0.3144793136  |
| H | -5.0766279815 | 2.0673648665  | 1.849976961   |
| C | 3.1763112517  | 0.3613347151  | 0.6459115777  |
| C | 3.8697366696  | -1.0129717828 | 0.6125316898  |
| H | 3.1714009085  | -1.8274887684 | 0.8306455983  |
| H | 4.332281206   | -1.2088716876 | -0.3603975133 |
| H | 4.6606007402  | -1.0464015386 | 1.3689286051  |
| C | 4.2562766115  | 1.4469207672  | 0.4333962223  |
| H | 5.0363067805  | 1.372040309   | 1.1999375059  |
| H | 4.7299830948  | 1.3360285789  | -0.5476113135 |
| H | 3.8302542424  | 2.4530701064  | 0.4855579623  |
| C | 2.5377971745  | 0.5418664348  | 2.0426450071  |
| H | 3.2983597388  | 0.4495915832  | 2.8265093114  |
| H | 2.0681014723  | 1.5238817778  | 2.1519199449  |
| H | 1.7704481282  | -0.2184488886 | 2.2199653255  |
| H | 1.7704481282  | -0.2184488886 | 2.2199653255  |

TS exo 0486

E(RB3LYP) = -706.411494294 A.U.

First frequency = -497.2331 cm<sup>-1</sup>

|   |               |               |               |
|---|---------------|---------------|---------------|
| H | 0.7312975364  | -0.550600491  | -3.2612448928 |
| C | 0.7455072223  | 0.1130147956  | -2.4003767631 |
| H | 0.1615027886  | 1.0177364969  | -2.5293570818 |
| C | 1.8248242917  | 0.0625548502  | -1.5315724102 |
| C | 1.8545714259  | 0.7844746158  | -0.3173100486 |
| C | 0.8135110551  | 1.6632346186  | -0.0551299766 |
| H | 0.7536090524  | 2.1708375994  | 0.9015229422  |
| H | 0.3115562639  | 2.1794234176  | -0.8627799343 |
| C | -1.1311904543 | 0.3599646108  | -0.1479186733 |
| H | -0.9176789536 | 0.1368107657  | 0.894333181   |
| C | -2.1654007922 | 1.4363080579  | -0.4107144733 |
| C | -0.8868245133 | -0.6372479874 | -1.0888156737 |
| H | -1.5247754068 | -0.6535224673 | -1.9717027505 |
| C | -0.3205779274 | -1.9691237264 | -0.6513167989 |

|   |               |               |               |
|---|---------------|---------------|---------------|
| H | 2.5461835896  | -0.7321107384 | -1.6863939022 |
| H | 0.5476018383  | -1.7850621596 | -0.0047153404 |
| H | 0.0568479568  | -2.5160454603 | -1.5217697607 |
| C | -1.3364269048 | -2.8365511937 | 0.1144586242  |
| H | -1.7372036172 | -2.2503384844 | 0.9508030134  |
| C | -0.7517291164 | -4.1513248116 | 0.6536736714  |
| H | -2.1920079245 | -3.0577718498 | -0.5394086506 |
| H | -1.5059501918 | -4.641027707  | 1.2829595511  |
| H | 0.0948883171  | -3.9214819403 | 1.3157441141  |
| C | -0.2968412828 | -5.1308832672 | -0.4343356922 |
| H | 0.047546777   | -6.0746956543 | 0.0009832043  |
| H | 0.5271766102  | -4.7242224472 | -1.0291567088 |
| H | -1.1190550591 | -5.3610231053 | -1.1221583838 |
| C | -2.3637749968 | 2.4228646162  | 0.7464628533  |
| H | -3.1241892353 | 0.9491512077  | -0.635458634  |
| H | -1.9033517819 | 1.9925765565  | -1.3246736118 |
| H | -2.6457770281 | 1.8600795164  | 1.6479751374  |
| C | -3.41700777   | 3.5083897518  | 0.4768294195  |
| H | -1.408311814  | 2.9068248987  | 0.9763932784  |
| C | -4.8466644779 | 2.9769662953  | 0.320519443   |
| H | -3.1333340403 | 4.0682863677  | -0.4251212743 |
| H | -3.3943186553 | 4.2315054201  | 1.3019498281  |
| H | -4.9463888261 | 2.3230794475  | -0.5516150891 |
| H | -5.561839157  | 3.7969282589  | 0.1983787188  |
| H | -5.1479761939 | 2.3997958185  | 1.2025785753  |
| C | 2.8885028002  | 0.4820487384  | 0.7894417217  |
| C | 3.8987127032  | -0.6045336404 | 0.3774479751  |
| H | 4.6259770606  | -0.7571181748 | 1.181592845   |
| H | 3.4082641447  | -1.5652106298 | 0.189172119   |
| H | 4.4546346995  | -0.3208421998 | -0.5220682783 |
| C | 3.6769400518  | 1.7734929251  | 1.1081521521  |
| H | 4.204935376   | 2.1345343788  | 0.219386002   |
| H | 3.0127617648  | 2.5733640598  | 1.4484452205  |
| H | 4.417737262   | 1.5915371041  | 1.8955110122  |
| C | 2.1669999286  | -0.0003908969 | 2.0691066068  |
| H | 2.8939200641  | -0.1963200293 | 2.8656338673  |
| H | 1.4579707431  | 0.7425410631  | 2.4451118886  |
| H | 1.6135799899  | -0.9262327797 | 1.8814148775  |



H 1.6135799899 -0.9262327797 1.8814148775

TS exo 0489

E(RB3LYP) = -706.413635520 A.U.

First frequency = -481.3212 cm<sup>-1</sup>

H 0.8388776921 -1.7165143534 -2.5655284169  
C 0.8988154988 -0.7488650959 -2.0764547472  
H 0.3620679867 0.0419612001 -2.5859013014  
C 1.9479064455 -0.4853617155 -1.2150702551  
C 2.0259691921 0.6973132917 -0.4431500293  
C 1.0504495003 1.66532038 -0.6474772997  
H 1.0123553047 2.5529343652 -0.0232136669  
H 0.6236942247 1.8057875277 -1.6321884071  
C -0.9241340826 0.6653720499 -0.1760944907  
H -0.7203411338 0.8876128462 0.8683422755  
C -1.8531971502 1.6232612425 -0.8898424192  
C -0.8469812744 -0.6694672721 -0.562444414  
H -1.4780860109 -0.9903057738 -1.3873469658  
C -0.4217030077 -1.7142748078 0.4432490642  
H 2.6063786513 -1.3128182062 -0.9730769523  
H -1.1561486325 -1.7257086041 1.2619168583  
H 0.5193679056 -1.382926156 0.9027113127  
C -0.241884155 -3.1458624471 -0.0841134776  
H 0.6436171472 -3.185853232 -0.7284046129  
C -1.444686252 -3.7159275535 -0.8542036622  
H -0.0288414197 -3.7994139703 0.7725003619  
H -1.2209821071 -4.7545021805 -1.1289959977  
H -1.5642257526 -3.1776108935 -1.8031858544  
C -2.7632745033 -3.6681144462 -0.0746760073  
H -3.5706722814 -4.1558767068 -0.6303858013  
H -3.0742913759 -2.6368459513 0.1225624648  
H -2.6686317735 -4.17591532 0.8923281324  
C -3.3371873986 1.4263952388 -0.5109228683  
H -1.7521789508 1.4868295046 -1.9753829129  
H -1.5588074228 2.6591163156 -0.6856980554  
H -3.9393773612 2.1740197892 -1.0460637526  
C -3.6338957223 1.5213767385 0.9940077638

|   |               |               |               |
|---|---------------|---------------|---------------|
| H | -3.6629826392 | 0.4429589256  | -0.8732269212 |
| C | -3.2232681286 | 2.8548058125  | 1.6277647842  |
| H | -3.1263952503 | 0.6990758117  | 1.5139520363  |
| H | -4.7084422228 | 1.362041219   | 1.1487566685  |
| H | -2.1386430338 | 3.0022122224  | 1.590233162   |
| H | -3.5245313141 | 2.9035801273  | 2.6791493289  |
| H | -3.6888383919 | 3.6997981125  | 1.106926039   |
| C | 3.0183265629  | 0.850463194   | 0.7287220375  |
| C | 2.2473801935  | 1.0501590551  | 2.0540248484  |
| H | 1.6023474213  | 1.9330046211  | 2.0247798586  |
| H | 1.617594162   | 0.1825963903  | 2.2755459763  |
| H | 2.9481890754  | 1.1816587623  | 2.8863413754  |
| C | 3.9353320786  | -0.3753060871 | 0.8937587891  |
| H | 4.6382936755  | -0.2035088525 | 1.7154189667  |
| H | 3.3658400814  | -1.2802566579 | 1.129938741   |
| H | 4.5232229259  | -0.5661432026 | -0.0099076563 |
| C | 3.9110027505  | 2.0867766868  | 0.4711775865  |
| H | 3.3132765684  | 2.9990228138  | 0.3852615702  |
| H | 4.6261042763  | 2.2269288136  | 1.2902486329  |
| H | 4.4761509936  | 1.9698570627  | -0.4593767857 |
| H | 4.4761509936  | 1.9698570627  | -0.4593767857 |

TS exo 0494

E(RB3LYP) = -706.411398616 A.U.

First frequency = -516.0469  $\text{cm}^{-1}$

|   |               |               |               |
|---|---------------|---------------|---------------|
| H | 1.3578949853  | -0.6096963416 | -3.2615693917 |
| C | 1.247210889   | 0.128723117   | -2.4712639788 |
| H | 0.7813644732  | 1.0531599659  | -2.7977398392 |
| C | 2.1518546851  | 0.1205543704  | -1.4168245845 |
| C | 2.0063596514  | 0.9539054729  | -0.2849153266 |
| C | 0.9744649749  | 1.8800513409  | -0.2924855577 |
| H | 0.7588907048  | 2.4899862759  | 0.5753358287  |
| H | 0.646815851   | 2.3136178344  | -1.22747173   |
| C | -0.9711732036 | 0.625815099   | -0.6445655612 |
| H | -0.9312603248 | 0.4277328756  | 0.4211585901  |
| C | -1.8888849106 | 1.746144445   | -1.099609423  |
| C | -0.6229594804 | -0.4147046025 | -1.5088974251 |

|   |               |               |               |
|---|---------------|---------------|---------------|
| H | -1.1124143836 | -0.4199514697 | -2.4831832276 |
| C | -0.2820824762 | -1.7777855286 | -0.9450844876 |
| H | 2.8458086832  | -0.714233475  | -1.3580136757 |
| H | 0.4500376932  | -1.6525824655 | -0.1391993199 |
| H | 0.2067527173  | -2.3933678486 | -1.7105297487 |
| C | -1.5065969919 | -2.5291523692 | -0.396706088  |
| H | -1.9793204791 | -1.9228072503 | 0.387601149   |
| C | -1.1594328478 | -3.9109990149 | 0.1683267268  |
| H | -2.2588833052 | -2.6362453605 | -1.1910994361 |
| H | -0.4007216305 | -3.7970654953 | 0.9548317342  |
| H | -0.6908231612 | -4.5173423977 | -0.6188696477 |
| C | -2.3770131799 | -4.6497462982 | 0.7310429498  |
| H | -3.1371250712 | -4.8028611433 | -0.0436571744 |
| H | -2.844043173  | -4.077848947  | 1.5411054742  |
| H | -2.1046255676 | -5.6323548274 | 1.1300985     |
| C | -2.3517638984 | 2.7078015717  | 0.0127212978  |
| H | -2.778829955  | 1.3141163632  | -1.5814087649 |
| H | -1.3902076152 | 2.3194706296  | -1.894910208  |
| H | -1.5304786098 | 2.8645344288  | 0.7234402287  |
| C | -3.6074089619 | 2.2513899936  | 0.7753717725  |
| H | -2.5631830727 | 3.6895497856  | -0.4280572347 |
| C | -3.4713542294 | 0.9164301034  | 1.5158167862  |
| H | -4.4448477801 | 2.1845348642  | 0.0671689197  |
| H | -3.8808691211 | 3.0343515668  | 1.4946006254  |
| H | -3.2978369867 | 0.0881068981  | 0.8223287295  |
| H | -4.3792555033 | 0.6887227047  | 2.084134184   |
| H | -2.6328822399 | 0.9386113332  | 2.2218890128  |
| C | 2.8624476232  | 0.6740510477  | 0.9679416712  |
| C | 2.5830091611  | -0.7452821203 | 1.5142820922  |
| H | 1.5355506626  | -0.8445023825 | 1.8180585687  |
| H | 2.7911192854  | -1.5171089598 | 0.7680311865  |
| H | 3.2090042795  | -0.950378437  | 2.3904787297  |
| C | 4.3556965384  | 0.7865844591  | 0.5833344915  |
| H | 4.9909754463  | 0.5959994123  | 1.4559972161  |
| H | 4.6315895391  | 0.0667315882  | -0.1925931406 |
| H | 4.5846702042  | 1.7883251695  | 0.2056831823  |
| C | 2.584373706   | 1.6797286112  | 2.1002812922  |
| H | 1.5519857973  | 1.6115271605  | 2.4589740158  |

|   |              |              |              |
|---|--------------|--------------|--------------|
| H | 3.2414225971 | 1.4727010163 | 2.9514278075 |
| H | 2.7670984224 | 2.7097563272 | 1.7779396751 |
| H | 2.7670984224 | 2.7097563272 | 1.7779396751 |

## 6 Regioselective intramolecular radical H-atom transfer

### 6.1 1,5 HAT

#### 6.1.1 Starting TS

TS input

E(UwB97XD) = -1036.74514643 A.U.

First frequency = -1538.7560 cm<sup>-1</sup>

|   |               |               |               |
|---|---------------|---------------|---------------|
| S | 0.9343104449  | -1.3529772657 | -0.1521547035 |
| O | 1.9684543252  | -1.7138327534 | -1.1339189767 |
| O | 0.0389090473  | -2.4259617742 | 0.2965485901  |
| N | -0.0307981594 | -0.1070857636 | -0.7003235969 |
| C | 0.72749986    | 1.0574240578  | -1.1914861117 |
| H | 1.454561802   | 0.7515289906  | -1.9554373412 |
| H | 0.0053987766  | 1.7242396604  | -1.6745360804 |
| C | 1.4137783813  | 1.7835877088  | -0.0413199043 |
| H | 1.7484081653  | 0.7598497272  | 0.6779196861  |
| C | -1.2417156122 | -0.4624889356 | -1.4568553704 |
| H | -1.4546485867 | -1.518959162  | -1.2865840325 |
| H | -1.0571376843 | -0.3335725631 | -2.5307251585 |
| C | -2.4230671652 | 0.3957463747  | -1.0067352732 |
| H | -3.2696770548 | 0.1884194323  | -1.6749564185 |
| H | -2.1714688664 | 1.4548172118  | -1.1509236004 |
| C | -2.8520832526 | 0.1726390808  | 0.4496661509  |
| H | -1.9498998137 | 0.2370230192  | 1.0726355205  |
| C | -3.8169576715 | 1.2747517892  | 0.8929736769  |
| H | -3.357561135  | 2.2651141248  | 0.8008250747  |
| H | -4.1193715237 | 1.1378211706  | 1.9364120357  |
| H | -4.7248895711 | 1.2664176993  | 0.2771418443  |
| C | -3.4728664384 | -1.2112666551 | 0.6598182502  |

|   |               |               |               |
|---|---------------|---------------|---------------|
| H | -3.7734128179 | -1.345498993  | 1.7041902448  |
| H | -2.7712657678 | -2.0137842456 | 0.4139703624  |
| H | -4.3665803681 | -1.3321139608 | 0.0348871127  |
| C | 1.7237375887  | -0.5357821569 | 1.2021975957  |
| H | 1.0136976572  | -0.4508008628 | 2.0248207033  |
| C | 3.1202682911  | -0.9811639549 | 1.539579885   |
| H | 3.5293281445  | -0.318402176  | 2.3064084284  |
| H | 3.7679530588  | -0.9431984981 | 0.660937492   |
| H | 3.1369479413  | -2.0031579287 | 1.9355960607  |
| C | 0.4609998407  | 2.5652361501  | 0.8377400833  |
| H | 0.1002368214  | 3.4553136936  | 0.3044397143  |
| H | -0.4088846158 | 1.959157756   | 1.1087869622  |
| H | 0.9523219826  | 2.9005431016  | 1.7559633845  |
| C | 2.6864969432  | 2.5036173755  | -0.4224610242 |
| H | 2.467785854   | 3.3305620689  | -1.1123542238 |
| H | 3.1751522476  | 2.9291087031  | 0.4588401989  |
| H | 3.3915219307  | 1.8310997529  | -0.9210892414 |
| H | 3.3915219307  | 1.8310997529  | -0.9210892414 |

### 6.1.2 Lowest TS

TS 6-311++G(d,p) 0003

E(UwB97XD) = -1036.89360521 A.U.

First frequency = -1540.9853 cm<sup>-1</sup>

|   |               |               |               |
|---|---------------|---------------|---------------|
| S | 0.5199260131  | -1.1670637656 | 1.1452609419  |
| O | -0.5527158201 | -2.1547267214 | 1.0585061347  |
| O | 1.2088328916  | -1.0360186322 | 2.4307392974  |
| N | -0.1178296063 | 0.2926458702  | 0.6393320145  |
| C | 0.844892798   | 1.4048532652  | 0.722515162   |
| H | 0.2890731529  | 2.320295203   | 0.5007798609  |
| H | 1.2367062878  | 1.4967512409  | 1.742647947   |
| C | 1.9757455512  | 1.2355410476  | -0.2825600688 |
| H | 2.1040590209  | -0.0547740592 | -0.2524703062 |
| C | -1.4909649627 | 0.6081262046  | 1.0613251161  |
| H | -1.4692648925 | 1.2434662579  | 1.954676922   |
| H | -1.9847756909 | -0.3229434417 | 1.3372776147  |
| C | -2.2641425239 | 1.297437571   | -0.0597808422 |

|   |               |               |               |
|---|---------------|---------------|---------------|
| H | -1.7890322727 | 2.2569450227  | -0.2963620475 |
| H | -3.2618897701 | 1.5397169135  | 0.3272070195  |
| C | -2.4029275936 | 0.4788606388  | -1.3479379479 |
| H | -1.3920634312 | 0.2356438927  | -1.6940245631 |
| C | -3.1482459037 | -0.8372913841 | -1.1223852696 |
| H | -4.1463145025 | -0.6499382884 | -0.709434428  |
| H | -2.6105884045 | -1.4954469541 | -0.4358187383 |
| H | -3.2733906214 | -1.3745671046 | -2.0669969493 |
| C | -3.0841808536 | 1.316515251   | -2.4300080559 |
| H | -2.5339657992 | 2.2429897797  | -2.620753794  |
| H | -4.1020782023 | 1.5867731902  | -2.1270967666 |
| H | -3.1517033795 | 0.7636114447  | -3.3712226093 |
| C | 1.7492644616  | -1.4011178353 | -0.0964747511 |
| H | 2.6154596267  | -1.8903471487 | 0.3430097336  |
| C | 1.2587762494  | -1.9038470294 | -1.4252479349 |
| H | 0.9656463896  | -2.9562467986 | -1.3693745525 |
| H | 2.0556632714  | -1.8117387829 | -2.1663581716 |
| H | 0.3980533065  | -1.327998642  | -1.7714074422 |
| C | 3.2970240219  | 1.8157957759  | 0.1610032094  |
| H | 3.2238737703  | 2.9074243351  | 0.2514598066  |
| H | 3.5992880064  | 1.4206058001  | 1.1343595017  |
| H | 4.0848244854  | 1.5971312471  | -0.5639134733 |
| C | 1.5772118413  | 1.5547409948  | -1.7056507063 |
| H | 1.4679211703  | 2.6399182609  | -1.8280725452 |
| H | 2.332271827   | 1.2130054543  | -2.4180261285 |
| H | 0.6215628357  | 1.0925309631  | -1.9624136004 |
| H | 0.6215628357  | 1.0925309631  | -1.9624136004 |

### 6.1.3 Additional TS

TS 6-31++G(d,p) 0001

E(UwB97XD) = -1036.74434301 A.U.

First frequency = -1545.2213 cm<sup>-1</sup>

|   |               |               |               |
|---|---------------|---------------|---------------|
| S | 0.2674546397  | -1.2281210715 | 0.2942976529  |
| O | -0.378211832  | -2.3027469373 | -0.4672269417 |
| O | -0.1805610379 | -1.0061743203 | 1.6768151058  |
| N | 0.1459383387  | 0.1576030759  | -0.6241249638 |

|   |               |               |               |
|---|---------------|---------------|---------------|
| C | 0.723051455   | 1.3559076244  | 0.0053089982  |
| H | 0.4953537703  | 2.1978114093  | -0.6578480161 |
| H | 0.2459438862  | 1.5598231378  | 0.9723443156  |
| C | 2.2365414054  | 1.228486964   | 0.1596700459  |
| H | 2.3356619114  | -0.0458425295 | 0.3921326985  |
| C | -0.9904181183 | 0.3395782494  | -1.5398999726 |
| H | -1.3128045362 | -0.6527961762 | -1.8589481291 |
| H | -0.5873637552 | 0.8445423001  | -2.4250810868 |
| C | -2.1640387287 | 1.1565763707  | -0.9931289378 |
| H | -2.877427413  | 1.2800123989  | -1.8200716425 |
| H | -1.8129978775 | 2.1667628792  | -0.746639615  |
| C | -2.8999359119 | 0.5743574492  | 0.220113852   |
| H | -2.1626365372 | 0.3911243513  | 1.0121659025  |
| C | -3.915392893  | 1.5908531896  | 0.7496042874  |
| H | -3.4292100313 | 2.5326533347  | 1.0264938535  |
| H | -4.4325441791 | 1.2049598376  | 1.6342034185  |
| H | -4.673625824  | 1.8141498216  | -0.0114092384 |
| C | -3.5878368761 | -0.7543833415 | -0.1061493447 |
| H | -4.1201691878 | -1.1381664078 | 0.7704168329  |
| H | -2.8729294461 | -1.520875587  | -0.4184288893 |
| H | -4.3205610477 | -0.6193057645 | -0.9119934378 |
| C | 2.0233449242  | -1.4075141805 | 0.3530409293  |
| H | 2.3144691071  | -1.8155066058 | 1.320071793   |
| C | 2.6742605275  | -1.9922534176 | -0.8708635836 |
| H | 2.3158154112  | -1.5053897373 | -1.7815536727 |
| H | 2.4739256742  | -3.0655750596 | -0.9539050111 |
| H | 3.7566414759  | -1.8514036594 | -0.8084901732 |
| C | 2.8066397096  | 1.9423700354  | 1.3635954825  |
| H | 2.3108676607  | 1.6261016327  | 2.2865155178  |
| H | 3.8794120352  | 1.7518343547  | 1.460946021   |
| H | 2.6701793622  | 3.0282779431  | 1.2646494839  |
| C | 2.994712426   | 1.4383996861  | -1.1340457585 |
| H | 2.5240878199  | 0.8973153384  | -1.960324313  |
| H | 3.0049330013  | 2.5060292681  | -1.3927438117 |
| H | 4.0333172202  | 1.1054983166  | -1.0465645305 |
| H | 4.0333172202  | 1.1054983166  | -1.0465645305 |

TS 6-31++G(d,p) 0003

E(UwB97XD) = -1036.74673942 A.U.

First frequency = -1530.5050 cm<sup>-1</sup>

|   |               |               |               |
|---|---------------|---------------|---------------|
| S | 0.5262316606  | -1.1466547778 | 1.1776526282  |
| O | -0.5416937298 | -2.1516353982 | 1.1469398074  |
| O | 1.2366164605  | -0.9532850984 | 2.4507782987  |
| N | -0.1332804176 | 0.2897555249  | 0.6174055718  |
| C | 0.8199684597  | 1.4153254706  | 0.6692873759  |
| H | 0.2599313942  | 2.313317101   | 0.3887026737  |
| H | 1.1845453851  | 1.5603099233  | 1.6949909103  |
| C | 1.9812180227  | 1.2141664538  | -0.2993426028 |
| H | 2.1003791417  | -0.0765122145 | -0.2509280638 |
| C | -1.5012943095 | 0.6019034889  | 1.0634493576  |
| H | -1.46920808   | 1.2245716008  | 1.9675690639  |
| H | -1.9890091696 | -0.3368931606 | 1.3293296538  |
| C | -2.2970746996 | 1.3078921225  | -0.0341339363 |
| H | -1.8679514395 | 2.2997557257  | -0.2259546054 |
| H | -3.3063619809 | 1.4856371146  | 0.3615374323  |
| C | -2.3980863735 | 0.5444415411  | -1.3611236372 |
| H | -1.3782918998 | 0.4093308743  | -1.7426842048 |
| C | -3.0194069325 | -0.8439426707 | -1.1898517761 |
| H | -4.0148112246 | -0.7690536922 | -0.7337977252 |
| H | -2.4019960153 | -1.4901172575 | -0.5589065236 |
| H | -3.132840818  | -1.3366112208 | -2.1613221758 |
| C | -3.1796136194 | 1.3735520959  | -2.3829315517 |
| H | -2.7235878993 | 2.3588942866  | -2.528988966  |
| H | -4.2129747318 | 1.5275348353  | -2.0483475418 |
| H | -3.2140860485 | 0.8696126677  | -3.3543667493 |
| C | 1.7385310656  | -1.4175142666 | -0.0741920519 |
| H | 2.6061434181  | -1.9131041321 | 0.3596030007  |
| C | 1.2228778646  | -1.93429163   | -1.3902748504 |
| H | 0.9346388524  | -2.9882771764 | -1.3189234874 |
| H | 2.0054387544  | -1.8447868548 | -2.1483700233 |
| H | 0.351717596   | -1.3634263929 | -1.7229162433 |
| C | 3.2953431731  | 1.7913127316  | 0.1761145842  |
| H | 3.2296594656  | 2.8860779353  | 0.2441841153  |
| H | 3.5630214934  | 1.4105628235  | 1.1665082628  |
| H | 4.103987387   | 1.5512028125  | -0.5202805697 |



|   |              |              |               |
|---|--------------|--------------|---------------|
| C | 1.6349218305 | 1.5116893565 | -1.7429429987 |
| H | 1.5293417589 | 2.595595204  | -1.8871680064 |
| H | 2.4175507328 | 1.1580596237 | -2.4207363438 |
| H | 0.6895082204 | 1.0428636661 | -2.0292595125 |
| H | 0.6895082204 | 1.0428636661 | -2.0292595125 |

TS 6-31++G(d,p) 0004

E(UwB97XD) = -1036.74442403 A.U.

First frequency = -1540.9074 cm<sup>-1</sup>

|   |               |               |               |
|---|---------------|---------------|---------------|
| S | 0.5634743149  | -1.1906216687 | 0.6945165131  |
| O | -0.1641419151 | -2.3482254248 | 0.1635681549  |
| O | 0.3356499385  | -0.8318897463 | 2.1024668909  |
| N | 0.2346627277  | 0.0930714412  | -0.3304957347 |
| C | 0.86408615    | 1.3564210316  | 0.0971707583  |
| H | 0.4634419147  | 2.1399346137  | -0.5565933111 |
| H | 0.5864611788  | 1.6110475264  | 1.1276453575  |
| C | 2.3805783006  | 1.2818219592  | -0.0481961522 |
| H | 2.5714640288  | 0.0422962375  | 0.2894923706  |
| C | -1.1358771823 | 0.1795749379  | -0.8561696619 |
| H | -1.3943044563 | -0.8083341327 | -1.2404891045 |
| H | -1.0806872041 | 0.8581123533  | -1.7152263039 |
| C | -2.1845883192 | 0.6745709364  | 0.1407700016  |
| H | -1.8327876054 | 1.6079531414  | 0.5975312697  |
| H | -2.2867830148 | -0.055631135  | 0.9546318257  |
| C | -3.560801317  | 0.9239074064  | -0.491742369  |
| H | -3.4286904857 | 1.6480137511  | -1.3089580192 |
| C | -4.1686492357 | -0.3536520357 | -1.0803952815 |
| H | -5.1722859152 | -0.1587968788 | -1.4722368126 |
| H | -4.252769007  | -1.128865739  | -0.3089653167 |
| H | -3.5686953978 | -0.7592763437 | -1.9005874911 |
| C | -4.5088450563 | 1.5432793371  | 0.5386135857  |
| H | -4.6733355116 | 0.8520883395  | 1.3741400866  |
| H | -5.4830875053 | 1.7675414603  | 0.092051318   |
| H | -4.1003776817 | 2.4736415382  | 0.9471759932  |
| C | 2.3093031459  | -1.3219773323 | 0.4638012994  |
| H | 2.7770988152  | -1.6030397782 | 1.4064671866  |
| C | 2.7666795554  | -2.0369104199 | -0.7786547219 |

|   |              |               |               |
|---|--------------|---------------|---------------|
| H | 3.8402264815 | -1.8794431902 | -0.912013186  |
| H | 2.2503182028 | -1.6608483612 | -1.6655267949 |
| H | 2.5860601182 | -3.1145901592 | -0.7074931667 |
| C | 3.147040932  | 2.1295915364  | 0.9409136228  |
| H | 2.8579080464 | 1.9013562301  | 1.9714043285  |
| H | 4.2248342635 | 1.9733043049  | 0.8383894534  |
| H | 2.9481689395 | 3.1958843337  | 0.7650129521  |
| C | 2.8613566365 | 1.369896979   | -1.4809723551 |
| H | 2.7737744953 | 2.4039629987  | -1.8415510909 |
| H | 3.9110965928 | 1.0737775777  | -1.5675623354 |
| H | 2.2632632271 | 0.7324438402  | -2.1384994106 |
| H | 2.2632632271 | 0.7324438402  | -2.1384994106 |

TS 6-31++G(d,p) 0007

E(UwB97XD) = -1036.74433443 A.U.

First frequency = -1540.8976 cm<sup>-1</sup>

|   |               |               |               |
|---|---------------|---------------|---------------|
| S | 0.5993331734  | -1.2712903471 | 0.6676295253  |
| O | -0.0892701202 | -2.4616149047 | 0.1572099268  |
| O | 0.3825287533  | -0.9133768006 | 2.077539883   |
| N | 0.2000389757  | -0.0092492193 | -0.3601317322 |
| C | 0.7792282035  | 1.283459517   | 0.0518159529  |
| H | 0.3420283599  | 2.042764957   | -0.6070959597 |
| H | 0.4954199877  | 1.5355934935  | 1.0812546719  |
| C | 2.2966028265  | 1.2732305427  | -0.1031348057 |
| H | 2.5445222767  | 0.0434173629  | 0.231191511   |
| C | -1.1828048999 | 0.0227731559  | -0.8597193586 |
| H | -1.4241826939 | -0.9771058178 | -1.2286857066 |
| H | -1.1582446433 | 0.6904186667  | -1.726164169  |
| C | -2.230377987  | 0.480074584   | 0.1565858987  |
| H | -1.997271607  | 1.4978511016  | 0.4989964374  |
| H | -2.1718054088 | -0.1699197926 | 1.0378010556  |
| C | -3.6655033287 | 0.4536259633  | -0.387957425  |
| H | -3.8709053797 | -0.5665435385 | -0.7426437021 |
| C | -4.657955822  | 0.77188858    | 0.7335816707  |
| H | -4.5515441172 | 0.072222536   | 1.5690826318  |
| H | -5.6902899045 | 0.716002227   | 0.3729888149  |
| H | -4.4912644051 | 1.7852628599  | 1.1190524522  |

|   |               |               |               |
|---|---------------|---------------|---------------|
| C | -3.8600443473 | 1.4163446807  | -1.564208009  |
| H | -3.2450693134 | 1.1473384094  | -2.4283526807 |
| H | -3.5997093901 | 2.4404739964  | -1.2688220379 |
| H | -4.9042943326 | 1.4179458391  | -1.8931754818 |
| C | 2.344529219   | -1.3310986637 | 0.4071592752  |
| H | 2.838819484   | -1.5924099718 | 1.3419939776  |
| C | 2.8118192181  | -2.0247228293 | -0.8436087383 |
| H | 2.6813237597  | -3.1094706329 | -0.7700834747 |
| H | 3.8748047165  | -1.81917737   | -0.9953086027 |
| H | 2.2637489954  | -1.6719418842 | -1.7210059174 |
| C | 3.0333275129  | 2.1516719251  | 0.8818234347  |
| H | 2.761036185   | 1.9099941029  | 1.9138299234  |
| H | 4.1160151473  | 2.04097998    | 0.7718109991  |
| H | 2.7885619051  | 3.2088601497  | 0.7089964485  |
| C | 2.7631200911  | 1.3824978264  | -1.5392259595 |
| H | 2.1909993276  | 0.7172102294  | -2.1923582165 |
| H | 2.6249009592  | 2.410999633   | -1.8998211411 |
| H | 3.8248797652  | 1.1354455955  | -1.6329079276 |
| H | 3.8248797652  | 1.1354455955  | -1.6329079276 |

TS 6-31++G(d,p) 0016

E(UwB97XD) = -1036.74329748 A.U.

First frequency = -1531.0036 cm<sup>-1</sup>

|   |               |               |               |
|---|---------------|---------------|---------------|
| S | 0.6023965185  | -1.333865271  | 0.3341430314  |
| O | 0.4393636892  | -1.8721805372 | -1.0247451374 |
| O | -0.0967802043 | -2.0334981762 | 1.4185253123  |
| N | 0.1488135227  | 0.27452256    | 0.4291887497  |
| C | 0.7493809235  | 1.1192778113  | -0.6207959353 |
| H | 0.5366531363  | 0.7207829158  | -1.6208455956 |
| H | 0.2629667105  | 2.0987542043  | -0.5461051222 |
| C | 2.2518124601  | 1.2649558006  | -0.404451608  |
| H | 2.5203156213  | 0.0791689091  | 0.0405133258  |
| C | -1.2579193892 | 0.545193636   | 0.7634422975  |
| H | -1.2761455204 | 1.585812169   | 1.1009697442  |
| H | -1.5194836121 | -0.0777088118 | 1.6223283773  |
| C | -2.2510597083 | 0.3202780898  | -0.3778280945 |
| H | -2.1487455388 | -0.7115203106 | -0.7344672756 |

|   |               |               |               |
|---|---------------|---------------|---------------|
| H | -1.998440532  | 0.9734350134  | -1.2246570356 |
| C | -3.7124353954 | 0.566772409   | 0.0228564683  |
| H | -3.9385054023 | -0.0807528094 | 0.8821094488  |
| C | -3.9654408982 | 2.0194836651  | 0.4398913884  |
| H | -3.6887746178 | 2.7050849384  | -0.3708265593 |
| H | -3.3960387125 | 2.3023751048  | 1.3304125954  |
| H | -5.0251899901 | 2.1774439737  | 0.665000901   |
| C | -4.6446079517 | 0.1699038881  | -1.1250536608 |
| H | -4.4971021595 | -0.876009334  | -1.4135481943 |
| H | -4.4551990063 | 0.7931082093  | -2.0076992305 |
| H | -5.6943690145 | 0.2995323432  | -0.8421695032 |
| C | 2.3338894325  | -1.1675617521 | 0.6447332192  |
| H | 2.4882165594  | -0.9556794476 | 1.7025213323  |
| C | 3.2355589484  | -2.1877832924 | 0.005370014   |
| H | 3.0585482559  | -2.248911173  | -1.0706494574 |
| H | 3.0906162249  | -3.1856038969 | 0.4355320388  |
| H | 4.27580943    | -1.8982265196 | 0.1744979643  |
| C | 2.6170167154  | 2.1787681645  | 0.7457620581  |
| H | 3.6792392208  | 2.0965740025  | 0.994776004   |
| H | 2.4146980652  | 3.2242680505  | 0.4763734526  |
| H | 2.0304595115  | 1.9388051632  | 1.6378586179  |
| C | 3.0520733083  | 1.4627636528  | -1.6710681654 |
| H | 2.7979874659  | 2.4237769041  | -2.1396975406 |
| H | 4.1252034272  | 1.4724117026  | -1.4591355067 |
| H | 2.8478700843  | 0.6721264004  | -2.3998586408 |
| H | 2.8478700843  | 0.6721264004  | -2.3998586408 |

TS 6-31++G(d,p) 0017

E(UwB97XD) = -1036.74327744 A.U.

First frequency = -1535.9902  $\text{cm}^{-1}$

|   |               |               |               |
|---|---------------|---------------|---------------|
| S | 0.2876093985  | -1.010550938  | 0.6740800409  |
| O | -0.0817343729 | -1.7615430915 | -0.5344255393 |
| O | -0.3990984743 | -1.3652098331 | 1.9219689689  |
| N | 0.1055604993  | 0.6310862955  | 0.467668498   |
| C | 0.7367728042  | 1.171549622   | -0.7468654634 |
| H | 0.3522688153  | 0.6717574048  | -1.6450689482 |
| H | 0.4456637049  | 2.2259474553  | -0.8082469288 |

|   |               |               |               |
|---|---------------|---------------|---------------|
| C | 2.2574144842  | 1.0671678208  | -0.671921128  |
| H | 2.3702826797  | -0.0519725505 | -0.0294724918 |
| C | -1.0872495009 | 1.3148008504  | 0.9901642172  |
| H | -0.7414987384 | 2.2891512087  | 1.3534311782  |
| H | -1.4289668089 | 0.7536652155  | 1.8612856468  |
| C | -2.224158627  | 1.5325439394  | -0.0116450669 |
| H | -1.8577803401 | 2.151358689   | -0.8407323103 |
| H | -2.9862969973 | 2.1367896932  | 0.5003186737  |
| C | -2.8862903174 | 0.2729535778  | -0.5837427693 |
| H | -2.104228655  | -0.3491258052 | -1.0374526436 |
| C | -3.5831719968 | -0.5542774225 | 0.5003527175  |
| H | -2.881502412  | -0.9058970077 | 1.2620964865  |
| H | -4.0638408569 | -1.435695763  | 0.0632240321  |
| H | -4.3601032441 | 0.0408007063  | 0.9971442446  |
| C | -3.8763509596 | 0.6608135311  | -1.6856027307 |
| H | -3.3815292367 | 1.2196853515  | -2.4873732924 |
| H | -4.6790114022 | 1.290525658   | -1.2817247986 |
| H | -4.3385899675 | -0.2274377756 | -2.1285643453 |
| C | 2.0455239226  | -1.100431526  | 0.8324282495  |
| H | 2.33350151    | -0.7113961676 | 1.8090185613  |
| C | 2.7059451822  | -2.3724445926 | 0.3759589498  |
| H | 2.425294357   | -2.6151770402 | -0.6511976866 |
| H | 2.4386397791  | -3.2215902244 | 1.0157054196  |
| H | 3.7906830522  | -2.2465917048 | 0.4231990224  |
| C | 2.8870964557  | 2.081204291   | 0.259276068   |
| H | 2.8386835137  | 3.0844498565  | -0.1853005982 |
| H | 2.3614305103  | 2.1103539347  | 1.2189782858  |
| H | 3.9394957719  | 1.8477574374  | 0.446553272   |
| C | 2.9426871936  | 0.8962752401  | -2.0076850101 |
| H | 2.5341647818  | 0.043655265   | -2.5591575484 |
| H | 2.8049853387  | 1.7930349387  | -2.6278718325 |
| H | 4.0186037165  | 0.745403383   | -1.8799106653 |
| H | 4.0186037165  | 0.745403383   | -1.8799106653 |

TS 6-31++G(d,p) 0018

E(UwB97XD) = -1036.74514642 A.U.

First frequency = -1538.7552  $\text{cm}^{-1}$

|   |               |               |               |
|---|---------------|---------------|---------------|
| S | 0.4490636624  | -1.5048189039 | -0.3002078457 |
| O | 1.2404461607  | -2.0703158422 | -1.4035978337 |
| O | -0.6938890428 | -2.2950714056 | 0.1725908773  |
| N | -0.1270930518 | 0.0170839864  | -0.6691484868 |
| C | 0.9106132773  | 0.9391312964  | -1.1644846767 |
| H | 1.445016978   | 0.4984908421  | -2.0165796133 |
| H | 0.3922245326  | 1.8323209159  | -1.5290337148 |
| C | 1.8763963629  | 1.3200354448  | -0.0494382208 |
| H | 1.9365673247  | 0.1831299132  | 0.5679481029  |
| C | -1.444768429  | 0.1103891786  | -1.3172404505 |
| H | -1.9576707005 | -0.8442223077 | -1.1903159677 |
| H | -1.3155323261 | 0.2730979501  | -2.3946037138 |
| C | -2.2656561942 | 1.2399413726  | -0.6967501245 |
| H | -3.1853860247 | 1.3566146745  | -1.2855953982 |
| H | -1.7132689635 | 2.1831212748  | -0.801653618  |
| C | -2.6251139058 | 1.0270944208  | 0.7798746935  |
| H | -1.7001290371 | 0.7623110683  | 1.3094603916  |
| C | -3.1667484609 | 2.3237963045  | 1.385973023   |
| H | -3.41249554   | 2.1916031875  | 2.444794173   |
| H | -4.0794481239 | 2.6428795718  | 0.8674894408  |
| H | -2.4344989662 | 3.1349332743  | 1.3070989813  |
| C | -3.6218170051 | -0.1199390074 | 0.9686601707  |
| H | -4.5562392737 | 0.0888156716  | 0.4328005901  |
| H | -3.8649726146 | -0.2501868941 | 2.0283633072  |
| H | -3.2221983358 | -1.0707088736 | 0.603881118   |
| C | 1.5568792396  | -1.0866421111 | 1.0124748399  |
| H | 0.9753596288  | -0.8661382365 | 1.9076288809  |
| C | 2.7711870605  | -1.9590723536 | 1.1762604025  |
| H | 3.3269084183  | -2.0390692555 | 0.2393911355  |
| H | 2.5045194027  | -2.9699810108 | 1.5056988368  |
| H | 3.4239572063  | -1.5209461524 | 1.9355666366  |
| C | 1.2833198767  | 2.2699101383  | 0.9691389855  |
| H | 0.2938742564  | 1.9312597968  | 1.2913375083  |
| H | 1.9256239533  | 2.3588946188  | 1.8503252098  |
| H | 1.1720858074  | 3.2711114055  | 0.5309372795  |
| C | 3.2740806009  | 1.6557289473  | -0.5155972117 |
| H | 3.9385926905  | 1.8344161895  | 0.3347046543  |
| H | 3.6961300657  | 0.8498893538  | -1.124257667  |

|   |              |              |               |
|---|--------------|--------------|---------------|
| H | 3.2657056568 | 2.5683145363 | -1.1277597139 |
| H | 3.2657056568 | 2.5683145363 | -1.1277597139 |

TS 6-31++G(d,p) 0019

E(UwB97XD) = -1036.74341315 A.U.

First frequency = -1534.3419  $\text{cm}^{-1}$

|   |               |               |               |
|---|---------------|---------------|---------------|
| S | 0.5432844683  | -1.3197590454 | 0.0331101003  |
| O | 0.3626622163  | -1.5976436091 | -1.3997022761 |
| O | -0.2104764897 | -2.1541715602 | 0.9762776606  |
| N | 0.188096015   | 0.2720096603  | 0.4090021714  |
| C | 0.8564641609  | 1.2482987848  | -0.4721550935 |
| H | 0.6422186706  | 1.0433267139  | -1.5285698836 |
| H | 0.4271176676  | 2.227995572   | -0.2324259717 |
| C | 2.3604213074  | 1.2613430728  | -0.2205340989 |
| H | 2.5496252068  | 0.0005074576  | 0.0039808808  |
| C | -1.2046266179 | 0.5611921443  | 0.783594063   |
| H | -1.179325868  | 1.5352470803  | 1.2854526166  |
| H | -1.4963722495 | -0.179090536  | 1.5301383395  |
| C | -2.1979569395 | 0.5923991893  | -0.3788839123 |
| H | -2.2730714615 | -0.4098318133 | -0.8213792279 |
| H | -1.8114594598 | 1.2548636891  | -1.1633935541 |
| C | -3.5984001577 | 1.0730134582  | 0.0261757301  |
| H | -3.4942192049 | 2.0713015271  | 0.4757828717  |
| C | -4.4880741299 | 1.204208012   | -1.2128902697 |
| H | -4.6227739786 | 0.228171854   | -1.694649016  |
| H | -4.0476836256 | 1.8847878955  | -1.949234944  |
| H | -5.4789846513 | 1.5867457563  | -0.9471742793 |
| C | -4.25137131   | 0.1499837938  | 1.0605097985  |
| H | -3.6957586429 | 0.123363254   | 2.0027503666  |
| H | -4.3112907526 | -0.8753529897 | 0.6754884611  |
| H | -5.2689922699 | 0.4837349248  | 1.2881980838  |
| C | 2.2778877726  | -1.3206400386 | 0.3709985253  |
| H | 2.4305003734  | -1.3133688618 | 1.4500210736  |
| C | 3.1242554453  | -2.2636894093 | -0.4395766905 |
| H | 2.9612098523  | -2.1176770019 | -1.5095779215 |
| H | 2.9108529056  | -3.3115103027 | -0.198496221  |
| H | 4.177668576   | -2.0768245988 | -0.2161278798 |

|   |              |              |               |
|---|--------------|--------------|---------------|
| C | 2.7571582208 | 1.9293314729 | 1.0785930025  |
| H | 3.8075623333 | 1.7376905947 | 1.3174176303  |
| H | 2.6232745845 | 3.0167796649 | 1.0004269413  |
| H | 2.1400374385 | 1.5703497633 | 1.9078639832  |
| C | 3.1943579431 | 1.6344869418 | -1.4243386765 |
| H | 4.2620742317 | 1.5413579676 | -1.2054978662 |
| H | 2.9585754827 | 1.0009589043 | -2.2851607028 |
| H | 3.0048291325 | 2.6774168962 | -1.7142955944 |
| H | 3.0048291325 | 2.6774168962 | -1.7142955944 |

TS 6-31++G(d,p) 0029

E(UwB97XD) = -1036.74432661 A.U.

First frequency = -1532.2100 cm<sup>-1</sup>

|   |               |               |               |
|---|---------------|---------------|---------------|
| S | 0.772412761   | -1.4937291729 | 0.6337016976  |
| O | -0.0816611007 | -2.5366900159 | 0.0554269562  |
| O | 1.1070124298  | -1.6080748064 | 2.0613941764  |
| N | 0.0434077617  | -0.0226282574 | 0.289065404   |
| C | 0.7841345178  | 1.1289728678  | 0.8389593184  |
| H | 0.1508627585  | 2.0106204372  | 0.6928307022  |
| H | 0.936516978   | 1.0091588834  | 1.9199543295  |
| C | 2.1106742404  | 1.3232066256  | 0.1157040032  |
| H | 2.4397296716  | 0.0819687455  | -0.065653443  |
| C | -1.4188623817 | 0.0352486009  | 0.4451013579  |
| H | -1.6745447137 | 0.4537050349  | 1.4290812074  |
| H | -1.8020854573 | -0.9854876934 | 0.4097388486  |
| C | -2.0409563998 | 0.8653761413  | -0.6750058243 |
| H | -1.8723775383 | 0.3469833461  | -1.6281650681 |
| H | -1.520627673  | 1.8289635232  | -0.7458770894 |
| C | -3.5406609078 | 1.1307343457  | -0.4878182927 |
| H | -3.6718868794 | 1.6537908471  | 0.4704337321  |
| C | -4.0544014523 | 2.048404629   | -1.600386362  |
| H | -5.1133437518 | 2.2862462582  | -1.4563426904 |
| H | -3.9491893865 | 1.5638471838  | -2.5787375816 |
| H | -3.4962974923 | 2.9903088908  | -1.6294611584 |
| C | -4.3564760512 | -0.1651681809 | -0.4384492934 |
| H | -4.1972711099 | -0.7541720919 | -1.3501079238 |
| H | -5.4264275453 | 0.0541500099  | -0.3626219579 |



|   |               |               |               |
|---|---------------|---------------|---------------|
| H | -4.0877024815 | -0.7910819744 | 0.4179912233  |
| C | 2.2848906029  | -1.2967440464 | -0.2558543479 |
| H | 3.0924949383  | -1.7732859508 | 0.2983553692  |
| C | 2.22027706    | -1.542080469  | -1.7391341812 |
| H | 2.0946357641  | -2.6067447823 | -1.9618088324 |
| H | 3.1512269091  | -1.204066537  | -2.2018948462 |
| H | 1.3902245238  | -0.9962308994 | -2.1949738108 |
| C | 3.1986886035  | 1.9479080935  | 0.95863076    |
| H | 2.9272528815  | 2.9770986834  | 1.2314731874  |
| H | 3.3579638221  | 1.3876092957  | 1.8850863241  |
| H | 4.1438938887  | 1.9898848     | 0.4097512377  |
| C | 1.9633872759  | 1.8964481165  | -1.2777356313 |
| H | 1.1569464752  | 1.4002537358  | -1.8254677831 |
| H | 1.7212288301  | 2.9663919573  | -1.2171871432 |
| H | 2.8901296054  | 1.7954422311  | -1.8504979196 |
| H | 2.8901296054  | 1.7954422311  | -1.8504979196 |

TS 6-31++G(d,p) 0031

E(UwB97XD) = -1036.74406499 A.U.

First frequency = -1526.2020  $\text{cm}^{-1}$

|   |               |               |               |
|---|---------------|---------------|---------------|
| S | 0.7959959544  | -1.4390704827 | 0.8566879003  |
| O | -0.0016972682 | -2.5899202214 | 0.4195372758  |
| O | 1.0853829849  | -1.3245976457 | 2.2942694667  |
| N | 0.0290994597  | -0.0666514091 | 0.2720008496  |
| C | 0.7139498799  | 1.1826497656  | 0.6566586153  |
| H | 0.053781002   | 2.0065266762  | 0.3654523623  |
| H | 0.8425078652  | 1.2331698488  | 1.7462197673  |
| C | 2.0512525899  | 1.3165045996  | -0.0600343259 |
| H | 2.4310249476  | 0.0766888342  | -0.0341990863 |
| C | -1.4386769434 | -0.0379559923 | 0.3886794396  |
| H | -1.7222304221 | 0.5058802158  | 1.2983981764  |
| H | -1.7968255011 | -1.064749725  | 0.4906081096  |
| C | -2.0580229183 | 0.5866762397  | -0.8591877345 |
| H | -1.7137911032 | 0.0091570356  | -1.7252506301 |
| H | -1.6845703949 | 1.6115351236  | -0.9945924033 |
| C | -3.592672863  | 0.619212336   | -0.8432753871 |
| H | -3.9497825521 | -0.4064966624 | -0.6732765655 |

|   |               |               |               |
|---|---------------|---------------|---------------|
| C | -4.1453818097 | 1.5092968224  | 0.2750368879  |
| H | -3.8751474574 | 1.1434271587  | 1.2700113466  |
| H | -5.2382505084 | 1.5549537497  | 0.2274897569  |
| H | -3.7621707101 | 2.5325230599  | 0.175169454   |
| C | -4.1192880963 | 1.0827925878  | -2.2042004028 |
| H | -5.2139078205 | 1.0762603408  | -2.2250836184 |
| H | -3.7604921795 | 0.4357685651  | -3.0114667386 |
| H | -3.7858020483 | 2.105759694   | -2.4180550424 |
| C | 2.3305437248  | -1.3199205405 | -0.0090808363 |
| H | 3.1350716739  | -1.6708463184 | 0.6359543471  |
| C | 2.3271031825  | -1.795077253  | -1.4369000195 |
| H | 1.4936382525  | -1.3626435434 | -1.9964131926 |
| H | 2.249948618   | -2.8857738904 | -1.4939244135 |
| H | 3.2602606584  | -1.4932626009 | -1.9198389376 |
| C | 3.0904784001  | 2.1118941179  | 0.6962020824  |
| H | 2.772683019   | 3.159132456   | 0.7948984214  |
| H | 3.2439349987  | 1.7129265813  | 1.7036109546  |
| H | 4.0488644457  | 2.105602398   | 0.1689973443  |
| C | 1.9204829293  | 1.6560666424  | -1.5296340563 |
| H | 1.6320154866  | 2.7099132793  | -1.6447511824 |
| H | 2.8667511578  | 1.5088374962  | -2.0587455338 |
| H | 1.1516418572  | 1.0433005649  | -2.009217945  |
| H | 1.1516418572  | 1.0433005649  | -2.009217945  |

TS 6-31++G(d,p) 0039

E(UwB97XD) = -1036.74323261 A.U.

First frequency = -1522.6565 cm<sup>-1</sup>

|   |               |               |               |
|---|---------------|---------------|---------------|
| S | 0.6732064605  | -1.5418055483 | 0.2196629523  |
| O | 1.0178375204  | -2.2897801736 | -0.9989560106 |
| O | -0.2169715277 | -2.2065402547 | 1.1789063171  |
| N | -0.0194287675 | -0.0578933362 | -0.1390849069 |
| C | 0.7763197003  | 0.737175536   | -1.0947998465 |
| H | 0.9857662452  | 0.1543218624  | -2.0019528697 |
| H | 0.1554877493  | 1.5896226178  | -1.3904250283 |
| C | 2.0642641844  | 1.2331370273  | -0.4515156468 |
| H | 2.353680272   | 0.1918927358  | 0.2581571493  |
| C | -1.4716312509 | -0.0650570935 | -0.3831564983 |

|   |               |               |               |
|---|---------------|---------------|---------------|
| H | -1.8863641502 | -0.9640982545 | 0.0750524928  |
| H | -1.6695099793 | -0.1196350861 | -1.4632081918 |
| C | -2.1192335746 | 1.1769684257  | 0.2243842181  |
| H | -1.5689973535 | 2.0695327942  | -0.0993504964 |
| H | -2.0174362849 | 1.1251448782  | 1.3163561277  |
| C | -3.5971051774 | 1.3497640258  | -0.1502902267 |
| H | -3.6613137368 | 1.4044334428  | -1.2466220693 |
| C | -4.455593588  | 0.1705922393  | 0.3186964298  |
| H | -4.3639177253 | 0.0363179995  | 1.4035696573  |
| H | -4.1668581114 | -0.7688563731 | -0.1625321681 |
| H | -5.5117384909 | 0.3462609768  | 0.089933233   |
| C | -4.13247224   | 2.6658549922  | 0.4199536667  |
| H | -5.1737329702 | 2.8282731367  | 0.1232329604  |
| H | -3.5431473515 | 3.5203820274  | 0.07071627    |
| H | -4.0934952334 | 2.654878604   | 1.516022533   |
| C | 2.1729909057  | -0.9935991674 | 0.9775306441  |
| H | 1.9511895645  | -0.6376199351 | 1.9833566897  |
| C | 3.3753170593  | -1.8821314785 | 0.8097823874  |
| H | 3.2553917277  | -2.8340809023 | 1.3397958321  |
| H | 4.2505220918  | -1.3759771857 | 1.2248481418  |
| H | 3.5620530618  | -2.0977572607 | -0.2444981452 |
| C | 1.8517869079  | 2.3342649843  | 0.5651914379  |
| H | 1.0443253745  | 2.077511945   | 1.2576117643  |
| H | 2.7620052947  | 2.5210337835  | 1.1427063718  |
| H | 1.5783989055  | 3.2688986318  | 0.0567742907  |
| C | 3.20490597    | 1.4513022153  | -1.4185322212 |
| H | 4.1223430577  | 1.7210031291  | -0.8873857528 |
| H | 3.3988993426  | 0.5551403941  | -2.0162204408 |
| H | 2.9691797438  | 2.2712029827  | -2.1112409834 |
| H | 2.9691797438  | 2.2712029827  | -2.1112409834 |

TS 6-31++G(d,p) 0040

E(UwB97XD) = -1036.74373340 A.U.

First frequency = -1513.6381 cm<sup>-1</sup>

|   |               |               |              |
|---|---------------|---------------|--------------|
| S | 0.4443140273  | -1.1795278861 | 0.9548881365 |
| O | -0.6132072696 | -2.1397998178 | 0.6204362114 |
| O | 0.9364489774  | -1.1741789728 | 2.3414235015 |

|   |               |               |               |
|---|---------------|---------------|---------------|
| N | -0.115790143  | 0.3374530718  | 0.4952618111  |
| C | 0.8515027262  | 1.4136623452  | 0.791522368   |
| H | 0.3399219476  | 2.3594109298  | 0.5823738846  |
| H | 1.1134760493  | 1.411572796   | 1.8586255149  |
| C | 2.0961578461  | 1.3037159667  | -0.0788365832 |
| H | 2.218895862   | 0.0159741621  | -0.1251190978 |
| C | -1.4985642909 | 0.6457613071  | 0.9140512934  |
| H | -1.4713123693 | 1.1710545295  | 1.8776656179  |
| H | -2.0240737228 | -0.2970165486 | 1.0765821394  |
| C | -2.2377101129 | 1.491224497   | -0.1288600119 |
| H | -1.5415622796 | 2.2223424803  | -0.5586736788 |
| H | -3.001870818  | 2.0732731509  | 0.4003878294  |
| C | -2.9282343639 | 0.7224524831  | -1.27026985   |
| H | -3.362399624  | 1.4909765397  | -1.9241749913 |
| C | -1.958868743  | -0.1094170074 | -2.113839808  |
| H | -2.4768975784 | -0.5396212971 | -2.977777869  |
| H | -1.5373402393 | -0.9322366665 | -1.5282735366 |
| H | -1.1295758022 | 0.5018292896  | -2.4852388566 |
| C | -4.0836489526 | -0.1465946335 | -0.762071873  |
| H | -4.6340027242 | -0.5833013429 | -1.6018722503 |
| H | -4.7896528396 | 0.4383187688  | -0.1626325204 |
| H | -3.7212526972 | -0.9770340776 | -0.1454975459 |
| C | 1.845451451   | -1.332230724  | -0.1080267233 |
| H | 2.6373573139  | -1.858531441  | 0.4233576682  |
| C | 1.5699342227  | -1.7430134806 | -1.5287634214 |
| H | 1.2393029208  | -2.7853928442 | -1.5860220621 |
| H | 2.4861999523  | -1.6422392992 | -2.1163070105 |
| H | 0.7988264427  | -1.1147529045 | -1.9809066968 |
| C | 3.3554719183  | 1.8400906305  | 0.5628561546  |
| H | 4.2257463154  | 1.6655640183  | -0.07641922   |
| H | 3.2716443763  | 2.9241878612  | 0.7210904292  |
| H | 3.5380206958  | 1.3734331963  | 1.5357339244  |
| C | 1.8736697303  | 1.7266342996  | -1.5150936031 |
| H | 2.7057161427  | 1.4186272068  | -2.1552475497 |
| H | 0.9493320379  | 1.2982962959  | -1.9123511545 |
| H | 1.7906559685  | 2.8204789298  | -1.57404901   |
| H | 1.7906559685  | 2.8204789298  | -1.57404901   |

TS 6-31++G(d,p) 0041

E(UwB97XD) = -1036.74293750 A.U.

First frequency = -1519.0060 cm<sup>-1</sup>

|   |               |               |               |
|---|---------------|---------------|---------------|
| S | 0.7184805862  | -1.5827191753 | 0.2067150022  |
| O | 1.0283877706  | -2.2823749527 | -1.0494874005 |
| O | -0.1048375903 | -2.304553581  | 1.1843746077  |
| N | -0.03553313   | -0.1112931494 | -0.0730478511 |
| C | 0.6921235443  | 0.7380655371  | -1.0369737979 |
| H | 0.8775576177  | 0.1910897327  | -1.9714035134 |
| H | 0.0330029009  | 1.5793784753  | -1.2755541898 |
| C | 1.9924963534  | 1.254327115   | -0.4363041523 |
| H | 2.3451645752  | 0.202265855   | 0.2264323138  |
| C | -1.4952657467 | -0.1648120009 | -0.2690685969 |
| H | -1.8710514771 | -1.0838923602 | 0.1862375276  |
| H | -1.718157392  | -0.209362308  | -1.3424949511 |
| C | -2.1654637174 | 1.0337834294  | 0.3980774726  |
| H | -1.7779999769 | 1.970107246   | -0.0275167312 |
| H | -1.8802674409 | 1.0272487089  | 1.456535825   |
| C | -3.6960962642 | 1.0357027007  | 0.2808486827  |
| H | -4.0657773971 | 0.0790361812  | 0.6765755318  |
| C | -4.283686966  | 2.1597872725  | 1.1384880337  |
| H | -3.9390104    | 3.1377084089  | 0.7803342014  |
| H | -3.9829121215 | 2.0597191547  | 2.1866098079  |
| H | -5.3777423582 | 2.1547255006  | 1.0973137233  |
| C | -4.1694072555 | 1.1676355921  | -1.1706280433 |
| H | -5.2621092524 | 1.2173618591  | -1.2174631595 |
| H | -3.8522334056 | 0.3232831583  | -1.7897574504 |
| H | -3.7720624553 | 2.0857122396  | -1.6212323762 |
| C | 2.2345047665  | -1.0107274608 | 0.9128839136  |
| H | 2.0497657039  | -0.6949689075 | 1.9393858247  |
| C | 3.4543410222  | -1.8537013112 | 0.6588311377  |
| H | 4.3318973574  | -1.3346340999 | 1.0523779946  |
| H | 3.5987307109  | -2.0258887487 | -0.4100284693 |
| H | 3.388068452   | -2.8271966473 | 1.1582558508  |
| C | 1.794135302   | 2.31725592    | 0.6230741106  |
| H | 2.7235637691  | 2.5139030234  | 1.1657152816  |
| H | 1.4712003332  | 3.2581571721  | 0.1570520398  |

|   |              |              |               |
|---|--------------|--------------|---------------|
| H | 1.0262688896 | 2.0150203605 | 1.3416725409  |
| C | 3.0805515795 | 1.5364323965 | -1.4465228115 |
| H | 3.2747686289 | 0.6640501531 | -2.0783911535 |
| H | 2.7879749911 | 2.3671468538 | -2.1037313702 |
| H | 4.0124328363 | 1.8208669072 | -0.9493785723 |
| H | 4.0124328363 | 1.8208669072 | -0.9493785723 |

TS 6-31++G(d,p) 0044

E(UwB97XD) = -1036.74327743 A.U.

First frequency = -1535.5923  $\text{cm}^{-1}$

|   |               |               |               |
|---|---------------|---------------|---------------|
| S | 0.258591358   | -0.9218688351 | 0.7306299567  |
| O | -0.1227949201 | -1.601886873  | -0.5155611993 |
| O | -0.4177169059 | -1.3465341733 | 1.9622311741  |
| N | 0.077745194   | 0.7291435488  | 0.6202670289  |
| C | 0.6994538994  | 1.3374988261  | -0.5667482108 |
| H | 0.3064375785  | 0.8904282078  | -1.4887391858 |
| H | 0.4096282297  | 2.3940334743  | -0.5651732112 |
| C | 2.2204971734  | 1.2271210222  | -0.5110463594 |
| H | 2.3367857062  | 0.0728217789  | 0.0651277802  |
| C | -1.1091847999 | 1.3834030094  | 1.1915782684  |
| H | -0.7584732217 | 2.3347991994  | 1.607164219   |
| H | -1.4444397761 | 0.7736229051  | 2.0319794492  |
| C | -2.2542916583 | 1.6598484402  | 0.2138876438  |
| H | -1.8939628299 | 2.3248999612  | -0.5813604618 |
| H | -3.010981792  | 2.234550172   | 0.7663452786  |
| C | -2.9234035324 | 0.4360718045  | -0.4240313754 |
| H | -2.1463224496 | -0.1596443873 | -0.9197392216 |
| C | -3.6120793004 | -0.4515962745 | 0.6166328474  |
| H | -2.9043129171 | -0.8475181955 | 1.3504859195  |
| H | -4.0981216988 | -1.3056872522 | 0.1336070653  |
| H | -4.3835523561 | 0.1147033944  | 1.1539184811  |
| C | -3.9224485282 | 0.8879142349  | -1.492908855  |
| H | -4.7206893804 | 1.49392525    | -1.0462760118 |
| H | -4.3897611699 | 0.0271915493  | -1.9824447244 |
| H | -3.4338290494 | 1.4917936764  | -2.265310892  |
| C | 2.0176734342  | -1.0229923715 | 0.8679422336  |
| H | 2.3149114843  | -0.6912658465 | 1.8627365972  |

|   |              |               |               |
|---|--------------|---------------|---------------|
| C | 2.6717818961 | -2.2674076819 | 0.333045123   |
| H | 3.7571172636 | -2.1461503525 | 0.3785167158  |
| H | 2.3822543103 | -2.4497450147 | -0.7040987408 |
| H | 2.4080266402 | -3.1518270518 | 0.9246626045  |
| C | 2.85988035   | 2.1852092341  | 0.4713704311  |
| H | 2.3424626143 | 2.1598704177  | 1.4356528381  |
| H | 3.9134217603 | 1.9400463947  | 0.6358737662  |
| H | 2.8094659505 | 3.2123903475  | 0.085557657   |
| C | 2.8940598894 | 1.1322724949  | -1.8602599199 |
| H | 3.9707710513 | 0.9730413083  | -1.7506055984 |
| H | 2.4794199833 | 0.3131513282  | -2.4561521228 |
| H | 2.7525877332 | 2.0632722007  | -2.426826176  |
| H | 2.7525877332 | 2.0632722007  | -2.426826176  |

TS 6-31++G(d,p) 0045

E(UwB97XD) = -1036.74226919 A.U.

First frequency = -1494.6082 cm<sup>-1</sup>

|   |               |               |               |
|---|---------------|---------------|---------------|
| S | 0.2235629944  | -1.3855714007 | -0.3764632467 |
| O | 0.8624358198  | -1.9237410994 | -1.5875329181 |
| O | -0.9730321204 | -2.0835573747 | 0.1091579717  |
| N | -0.1966409926 | 0.2295407445  | -0.5605836304 |
| C | 0.9175568371  | 1.0668247632  | -1.0516066847 |
| H | 1.290374225   | 0.6806131892  | -2.0106258463 |
| H | 0.4961007912  | 2.0602647462  | -1.2396185061 |
| C | 2.044177443   | 1.17385746    | -0.0317467965 |
| H | 1.9855082226  | -0.0038710114 | 0.488708955   |
| C | -1.4679776117 | 0.454542534   | -1.2796591872 |
| H | -2.0600221154 | -0.4608368811 | -1.2302455049 |
| H | -1.2489152376 | 0.6394077757  | -2.3397573993 |
| C | -2.273814833  | 1.6226659394  | -0.7098333806 |
| H | -3.0269357963 | 1.8709862843  | -1.4684107094 |
| H | -1.6300807047 | 2.5073179131  | -0.6205010509 |
| C | -3.0041239489 | 1.3894725907  | 0.627212391   |
| H | -3.6566073093 | 2.2638957458  | 0.7569130821  |
| C | -3.9030371553 | 0.1493712836  | 0.5909719871  |
| H | -4.5503989405 | 0.1495943436  | -0.2933782072 |
| H | -4.5445786704 | 0.1159884873  | 1.4776152768  |

|   |               |               |               |
|---|---------------|---------------|---------------|
| H | -3.3080737637 | -0.7702798371 | 0.5790113839  |
| C | -2.06699303   | 1.3463560963  | 1.8376054668  |
| H | -1.4573956724 | 2.2546300674  | 1.8941347621  |
| H | -1.39132862   | 0.488079474   | 1.7832182411  |
| H | -2.6445057772 | 1.2702543338  | 2.7654186444  |
| C | 1.4546014244  | -1.2361848365 | 0.8795528327  |
| H | 0.9705417074  | -1.0092926521 | 1.8293083601  |
| C | 2.5357469755  | -2.2820601597 | 0.8870548668  |
| H | 3.0171718795  | -2.3568685677 | -0.0904690829 |
| H | 2.1438617002  | -3.2700979535 | 1.1549799534  |
| H | 3.2892579173  | -2.0081596957 | 1.6297092873  |
| C | 1.7397769127  | 2.0991686755  | 1.1266393925  |
| H | 0.7634963527  | 1.8705450735  | 1.5622172952  |
| H | 2.4997975143  | 2.0152591887  | 1.9091610624  |
| H | 1.7226370257  | 3.1425345003  | 0.7835185204  |
| C | 3.4199802853  | 1.3265895241  | -0.639535726  |
| H | 4.1930771831  | 1.3151938565  | 0.1342108435  |
| H | 3.6313259711  | 0.5261446529  | -1.3554037353 |
| H | 3.4993362249  | 2.2833993071  | -1.1741370796 |
| H | 3.4993362249  | 2.2833993071  | -1.1741370796 |

TS 6-31++G(d,p) 0046

E(UwB97XD) = -1036.74368063 A.U.

First frequency = -1543.9142 cm<sup>-1</sup>

|   |               |               |               |
|---|---------------|---------------|---------------|
| S | 0.4296549302  | -1.3493523727 | 0.3561681373  |
| O | -0.0178681718 | -2.5026473927 | -0.4317759589 |
| O | -0.0489186706 | -1.243363297  | 1.7425195592  |
| N | 0.0376314742  | 0.0108452044  | -0.5237849812 |
| C | 0.431772255   | 1.2747884339  | 0.121209403   |
| H | -0.0149881979 | 2.0840533975  | -0.4654074153 |
| H | 0.0312380573  | 1.3456101064  | 1.139617974   |
| C | 1.949845845   | 1.4233101486  | 0.1413846929  |
| H | 2.274305371   | 0.1888826979  | 0.3885272384  |
| C | -1.1700630917 | -0.043782867  | -1.3632568068 |
| H | -1.0411859474 | -0.8750413468 | -2.0601334895 |
| H | -1.1503851882 | 0.8731799133  | -1.9593453673 |
| C | -2.5092142337 | -0.2089059489 | -0.640039628  |



|   |               |               |               |
|---|---------------|---------------|---------------|
| H | -2.4959130084 | -1.1664955599 | -0.1060326333 |
| H | -3.2830804267 | -0.3017842447 | -1.4155015681 |
| C | -2.9199837236 | 0.9030057103  | 0.3347941351  |
| H | -2.1267330456 | 1.014659668   | 1.0843302842  |
| C | -3.1215332532 | 2.2484388535  | -0.3680574797 |
| H | -3.41659358   | 3.0211120454  | 0.3491605259  |
| H | -3.9135515503 | 2.1702498277  | -1.1230720121 |
| H | -2.2160063013 | 2.5987119977  | -0.87296394   |
| C | -4.1953902919 | 0.4947021679  | 1.0777678694  |
| H | -5.0244107879 | 0.3529968393  | 0.3733700685  |
| H | -4.4946966675 | 1.2631085541  | 1.7980775357  |
| H | -4.0518672272 | -0.4438350066 | 1.6231316545  |
| C | 2.1911253878  | -1.2069297808 | 0.3969198222  |
| H | 2.5588126136  | -1.5283926123 | 1.3705269499  |
| C | 2.9251608811  | -1.7032218828 | -0.819694711  |
| H | 2.4845027949  | -1.3077469583 | -1.7385358898 |
| H | 2.9112083028  | -2.796599433  | -0.8758156732 |
| H | 3.9676665757  | -1.3776175195 | -0.7704114771 |
| C | 2.480609113   | 2.2579658384  | 1.284071395   |
| H | 2.1491133028  | 3.3007145957  | 1.1822425612  |
| H | 2.1239922777  | 1.8869600514  | 2.2499396595  |
| H | 3.5744349173  | 2.2588598827  | 1.2935489801  |
| C | 2.5529239933  | 1.7263450153  | -1.2130506852 |
| H | 2.1211098769  | 1.0888316174  | -1.9900086113 |
| H | 2.3534089027  | 2.7720536054  | -1.4849366787 |
| H | 3.6377696178  | 1.5840861428  | -1.2074284282 |
| H | 3.6377696178  | 1.5840861428  | -1.2074284282 |

TS 6-31++G(d,p) 0057

E(UwB97XD) = -1036.74100275 A.U.

First frequency = -1605.7708 cm<sup>-1</sup>

|   |               |               |               |
|---|---------------|---------------|---------------|
| S | 0.3877489784  | -1.2902013523 | 0.5869464483  |
| O | -0.3369691817 | -2.3910861294 | -0.0528680058 |
| O | 0.2321868286  | -1.0901771204 | 2.0314126677  |
| N | -0.0586366628 | 0.1075013223  | -0.170101358  |
| C | 0.6165282941  | 1.3167696484  | 0.3140767176  |
| H | 0.1782959018  | 2.1646151684  | -0.2237054543 |

|   |               |               |               |
|---|---------------|---------------|---------------|
| H | 0.3804726939  | 1.4521770584  | 1.3741872493  |
| C | 2.1353943272  | 1.2866220242  | 0.1144332524  |
| H | 2.3570869729  | 0.0073146574  | 0.2856111189  |
| C | -0.7941463235 | 0.1222850295  | -1.4362009619 |
| H | -0.9879114303 | -0.9155909174 | -1.7129126346 |
| H | -0.1584531563 | 0.5592197415  | -2.2164943684 |
| C | -2.1185280915 | 0.8851597147  | -1.3770679396 |
| H | -2.5226874018 | 0.8531808697  | -2.3970061997 |
| H | -1.9376852322 | 1.9469822305  | -1.1592533484 |
| C | -3.1671456354 | 0.3324544166  | -0.3956890911 |
| H | -3.0760314137 | -0.7628202915 | -0.3857540083 |
| C | -2.9578443761 | 0.8429395968  | 1.0346001787  |
| H | -1.9781174977 | 0.5645504914  | 1.4280916513  |
| H | -3.7206977758 | 0.4341301115  | 1.7059459374  |
| H | -3.0398485426 | 1.9370762212  | 1.06207818    |
| C | -4.5781596309 | 0.6868346431  | -0.876278633  |
| H | -4.6997228766 | 1.775320057   | -0.9427834877 |
| H | -5.3369125056 | 0.3080774919  | -0.183397602  |
| H | -4.7813521721 | 0.2647611404  | -1.8662109583 |
| C | 2.1282051413  | -1.371204783  | 0.2746907707  |
| H | 2.6511739135  | -1.779659405  | 1.138417349   |
| C | 2.5273369906  | -1.8871304591 | -1.0822150639 |
| H | 3.5843716734  | -1.670892675  | -1.2583582497 |
| H | 1.9471902188  | -1.4146650325 | -1.8801826465 |
| H | 2.3820194576  | -2.9699113501 | -1.1548746111 |
| C | 2.9121758031  | 2.018859005   | 1.1850159899  |
| H | 3.9898099628  | 1.8951453044  | 1.0431354047  |
| H | 2.6944339238  | 3.0954725244  | 1.1474649974  |
| H | 2.6489110671  | 1.6600662448  | 2.1848007976  |
| C | 2.5913103124  | 1.5679962627  | -1.3021462394 |
| H | 2.4149240785  | 2.6234592715  | -1.5508762342 |
| H | 3.6611037737  | 1.370237342   | -1.4191247026 |
| H | 2.0523491168  | 0.9606412948  | -2.0344568575 |
| H | 2.0523491168  | 0.9606412948  | -2.0344568575 |

TS 6-31++G(d,p) 0058

E(UwB97XD) = -1036.74419712 A.U.

First frequency = -1524.8328 cm<sup>-1</sup>

|   |               |               |               |
|---|---------------|---------------|---------------|
| S | 0.6203386734  | -1.347276354  | 0.8971305902  |
| O | -0.3670147573 | -2.392415197  | 0.6120480353  |
| O | 1.2953113356  | -1.3970287517 | 2.2030473462  |
| N | -0.1478345593 | 0.125548969   | 0.6704404461  |
| C | 0.7289660129  | 1.2728375278  | 0.9830901487  |
| H | 0.1037559608  | 2.1703780817  | 0.9353398947  |
| H | 1.1243410845  | 1.1984727051  | 2.004581368   |
| C | 1.8620126115  | 1.3904109593  | -0.0304548332 |
| H | 2.103977503   | 0.1349142743  | -0.2431983274 |
| C | -1.5438463406 | 0.1945363864  | 1.1560667644  |
| H | -1.7044745976 | 1.2287654195  | 1.4692527676  |
| H | -1.6824278687 | -0.4202966689 | 2.0529636846  |
| C | -2.5686627166 | -0.1991560772 | 0.0927252914  |
| H | -3.5644245751 | 0.0061055194  | 0.5106650944  |
| H | -2.5092253426 | -1.2790180943 | -0.0728820237 |
| C | -2.4275804405 | 0.5202123567  | -1.2543111554 |
| H | -1.444311285  | 0.2574971459  | -1.6648247177 |
| C | -3.4943182665 | 0.0170678046  | -2.2300120213 |
| H | -4.4995553671 | 0.2665723338  | -1.8684137453 |
| H | -3.4407264656 | -1.0702789144 | -2.3491744269 |
| H | -3.3710707211 | 0.472816727   | -3.2180533043 |
| C | -2.4928788975 | 2.0434795274  | -1.1205987766 |
| H | -1.6646337867 | 2.4415240273  | -0.5260358264 |
| H | -3.4303124262 | 2.3516396642  | -0.6410835864 |
| H | -2.4450329203 | 2.5216457182  | -2.1045276791 |
| C | 1.8712959462  | -1.2419240579 | -0.3429329746 |
| H | 2.7768408875  | -1.7298738042 | 0.015292596   |
| C | 1.4360076554  | -1.5322257014 | -1.7536195412 |
| H | 1.2286115636  | -2.5979987802 | -1.8953744487 |
| H | 2.2321658601  | -1.2439980974 | -2.4450234605 |
| H | 0.5343416153  | -0.9713932551 | -2.0131692533 |
| C | 3.1330767371  | 1.9938910384  | 0.5220739859  |
| H | 3.4790743994  | 1.4536480947  | 1.4086254924  |
| H | 3.9303182146  | 1.9822454548  | -0.2267889308 |
| H | 2.9646553683  | 3.0405005373  | 0.811446593   |
| C | 1.4230116902  | 1.9324188441  | -1.3745400665 |
| H | 1.2209540014  | 3.0094694348  | -1.2954143499 |
| H | 2.1986166497  | 1.7919140709  | -2.1332658383 |

H 0.5059672678 1.4455587821 -1.7177487023  
H 0.5059672678 1.4455587821 -1.7177487023

TS 6-31++G(d,p) 0060

E(UwB97XD) = -1036.74271188 A.U.

First frequency = -1542.0760  $\text{cm}^{-1}$

S 0.4168539937 -1.3306364458 0.2849757538  
O -0.0126954322 -1.7014466291 -1.0714750317  
O -0.0718029043 -2.1585075205 1.3941274673  
N 0.0077824408 0.2419251428 0.6462233239  
C 0.4632264239 1.2298527822 -0.3466192714  
H 0.13304552 0.9619564081 -1.357762028  
H -0.0106870529 2.1822822521 -0.0882261466  
C 1.9809313185 1.3740690698 -0.3081054672  
H 2.2960072407 0.13081423 -0.1220958427  
C -1.2396185026 0.4670838784 1.3949693955  
H -1.238371232 1.5318908967 1.6448226206  
H -1.1548148551 -0.0778916992 2.3379731052  
C -2.5427638079 0.0589512178 0.7030366113  
H -3.3577833012 0.2434120401 1.4174713691  
H -2.5197847447 -1.0249341566 0.5391823715  
C -2.8773404254 0.7583580343 -0.6211601774  
H -2.0375318351 0.60655432 -1.3106172514  
C -4.1109101701 0.1076009259 -1.2536353397  
H -4.9831373309 0.2130538447 -0.5966149595  
H -3.9478641101 -0.9607916888 -1.4291148969  
H -4.3549422007 0.5755783921 -2.2129800841  
C -3.1011079987 2.2629193124 -0.4452907206  
H -3.3369743553 2.7353942626 -1.4042923661  
H -2.224122283 2.7733136683 -0.0355546049  
H -3.9409317333 2.4472949922 0.2359745559  
C 2.1811675211 -1.2013049032 0.2809498024  
H 2.5336765248 -1.1718980764 1.3119395128  
C 2.9254291174 -2.0921559034 -0.6758296736  
H 3.9856731155 -1.8271496041 -0.6565302788  
H 2.5522792992 -1.973022153 -1.6953403414  
H 2.8384203651 -3.1493027653 -0.3993886019

|   |              |              |               |
|---|--------------|--------------|---------------|
| C | 2.4979713516 | 2.0799692241 | 0.9263644778  |
| H | 2.2588913714 | 3.151029417  | 0.8768343432  |
| H | 2.0389110354 | 1.6718230594 | 1.8320441862  |
| H | 3.5843606865 | 1.9830287479 | 1.0123727465  |
| C | 2.6010033532 | 1.8102349132 | -1.6152099528 |
| H | 2.2874235397 | 2.8330671012 | -1.8668946814 |
| H | 3.693027335  | 1.8061772947 | -1.5516278382 |
| H | 2.2978490327 | 1.1563927105 | -2.4390165758 |
| H | 2.2978490327 | 1.1563927105 | -2.4390165758 |

TS 6-31++G(d,p) 0061

E(UwB97XD) = -1036.73995667 A.U.

First frequency = -1594.3294 cm<sup>-1</sup>

|   |               |               |               |
|---|---------------|---------------|---------------|
| S | 0.3173823582  | -1.2222308831 | 0.5236971877  |
| O | 0.1455814753  | -1.9741669859 | -0.7240665523 |
| O | -0.4292792286 | -1.6639898337 | 1.705786119   |
| N | -0.0778977324 | 0.3540059448  | 0.2431611907  |
| C | 0.6499266827  | 0.9983422402  | -0.8546199723 |
| H | 0.4675959419  | 0.4418521998  | -1.7798473262 |
| H | 0.2128919603  | 1.994164044   | -0.9880866786 |
| C | 2.1537565048  | 1.1028595392  | -0.5920196987 |
| H | 2.3376140063  | -0.0302792026 | 0.0288146907  |
| C | -0.8825462364 | 1.1494387717  | 1.172086671   |
| H | -0.2788487494 | 1.9913368446  | 1.532436979   |
| H | -1.1092103336 | 0.5161086236  | 2.0315265749  |
| C | -2.1864091363 | 1.6803194665  | 0.5738495576  |
| H | -1.9722043573 | 2.3788624704  | -0.2469745301 |
| H | -2.650481693  | 2.2819481606  | 1.3659018787  |
| C | -3.1843399833 | 0.6128676006  | 0.0905409489  |
| H | -3.0968179905 | -0.2578621649 | 0.7556453318  |
| C | -4.6179096432 | 1.1441157398  | 0.1900887058  |
| H | -5.339524289  | 0.3989302092  | -0.1610054157 |
| H | -4.7384161615 | 2.0431611462  | -0.4273280715 |
| H | -4.8760963846 | 1.4074039762  | 1.2213144127  |
| C | -2.895283122  | 0.150531314   | -1.3421194961 |
| H | -2.97595203   | 0.996427879   | -2.0367371726 |
| H | -3.6183642696 | -0.6099057213 | -1.6562614021 |

|   |               |               |               |
|---|---------------|---------------|---------------|
| H | -1.8950730291 | -0.2768913321 | -1.43833086   |
| C | 2.0578178177  | -1.1313776063 | 0.8402718339  |
| H | 2.2115240959  | -0.735794168  | 1.8451353656  |
| C | 2.9006477404  | -2.3093780643 | 0.4338664856  |
| H | 3.9555046162  | -2.0628656934 | 0.5806239285  |
| H | 2.7419480111  | -2.5607099223 | -0.6170483331 |
| H | 2.67554066    | -3.1964029857 | 1.037407324   |
| C | 2.5405677649  | 2.1407034449  | 0.4407003849  |
| H | 1.9913102453  | 2.0015950217  | 1.3770270162  |
| H | 3.6100305936  | 2.0904581771  | 0.6658383353  |
| H | 2.3206576792  | 3.1503022277  | 0.0681656691  |
| C | 3.0031696483  | 1.0927623741  | -1.8418685977 |
| H | 2.8251883454  | 2.0004020563  | -2.4358393618 |
| H | 4.0680010591  | 1.0656827157  | -1.5926010075 |
| H | 2.7720568132  | 0.2302503462  | -2.4747299262 |
| H | 2.7720568132  | 0.2302503462  | -2.4747299262 |

TS 6-31++G(d,p) 0062

E(UwB97XD) = -1036.74432659 A.U.

First frequency = -1532.2692  $\text{cm}^{-1}$

|   |               |               |               |
|---|---------------|---------------|---------------|
| S | 0.8311279351  | -1.3155935055 | 1.1191227327  |
| O | -0.0697020458 | -2.4458861327 | 0.8690050962  |
| O | 1.2180733879  | -1.0549046498 | 2.5139845211  |
| N | 0.1249657476  | 0.0332874855  | 0.4146824868  |
| C | 0.913994826   | 1.2645079017  | 0.6115820914  |
| H | 0.2969780015  | 2.0955693074  | 0.2533709627  |
| H | 1.1051888152  | 1.4335818191  | 1.6797496958  |
| C | 2.215832763   | 1.213249236   | -0.177809537  |
| H | 2.5075616322  | -0.0415803534 | -0.0290475963 |
| C | -1.3283308124 | 0.1798730286  | 0.5945914314  |
| H | -1.5355210481 | 0.8547565415  | 1.4373793299  |
| H | -1.737057597  | -0.7996324264 | 0.8466179213  |
| C | -1.9732702155 | 0.7002259275  | -0.6876059135 |
| H | -1.8540413471 | -0.0596893055 | -1.4711827249 |
| H | -1.4332541508 | 1.5917979879  | -1.0307440686 |
| C | -3.4578716833 | 1.0558396098  | -0.5324682123 |
| H | -3.5394748892 | 1.8203251802  | 0.253635316   |

|   |               |               |               |
|---|---------------|---------------|---------------|
| C | -3.9921488271 | 1.6589198508  | -1.8342748743 |
| H | -5.0387918791 | 1.9617148868  | -1.7269004935 |
| H | -3.9362921468 | 0.9270297909  | -2.6492921125 |
| H | -3.4133302585 | 2.5395974364  | -2.1324099819 |
| C | -4.3018669243 | -0.1516320048 | -0.1117152116 |
| H | -5.3625471856 | 0.1155512776  | -0.0646386471 |
| H | -4.0152204752 | -0.534156892  | 0.8726653367  |
| H | -4.1921170792 | -0.9680733486 | -0.8361265515 |
| C | 2.3122093693  | -1.4149076263 | 0.162976899   |
| H | 3.1289992621  | -1.7526887782 | 0.7995478361  |
| C | 2.1840778977  | -2.045911009  | -1.1971339221 |
| H | 1.3501282249  | -1.6145618979 | -1.7567723117 |
| H | 2.0245622861  | -3.1265260996 | -1.1216127043 |
| H | 3.104079922   | -1.8753168707 | -1.7624339694 |
| C | 3.3504568829  | 2.003774835   | 0.4323181264  |
| H | 4.2743997844  | 1.8655725665  | -0.1366035172 |
| H | 3.1146759138  | 3.0769626352  | 0.4269696208  |
| H | 3.5319985253  | 1.7067579959  | 1.4698378712  |
| C | 2.0285798398  | 1.3972268423  | -1.6688026286 |
| H | 1.1897813096  | 0.7999680408  | -2.0379425166 |
| H | 1.8148617783  | 2.4518596881  | -1.8905218073 |
| H | 2.9297327013  | 1.1154655888  | -2.2216539658 |
| H | 2.9297327013  | 1.1154655888  | -2.2216539658 |

TS 6-31++G(d,p) 0064

E(UwB97XD) = -1036.74406504 A.U.

First frequency = -1526.1515  $\text{cm}^{-1}$

|   |               |               |               |
|---|---------------|---------------|---------------|
| S | 0.8406582674  | -1.2340294385 | 1.2358834832  |
| O | 0.0050941956  | -2.4305638816 | 1.0875206964  |
| O | 1.173471719   | -0.8078091282 | 2.6037509595  |
| N | 0.0884670136  | -0.0068552802 | 0.3746085383  |
| C | 0.8119854581  | 1.2769877443  | 0.4521489788  |
| H | 0.1624835652  | 2.0327597271  | -0.0021117723 |
| H | 0.9727280012  | 1.5673554586  | 1.499082249   |
| C | 2.1309359753  | 1.2083912434  | -0.3065371294 |
| H | 2.4832758188  | -0.0041831683 | -0.0106260532 |
| C | -1.3743402182 | 0.0889622192  | 0.5153944456  |

|   |               |               |               |
|---|---------------|---------------|---------------|
| H | -1.619376458  | 0.8311171339  | 1.2853999472  |
| H | -1.7524424913 | -0.8780895657 | 0.8542360453  |
| C | -2.0149904898 | 0.4345247433  | -0.8266483233 |
| H | -1.7083897766 | -0.3321064231 | -1.5480156202 |
| H | -1.6229840565 | 1.3919676916  | -1.1978240521 |
| C | -3.5474704652 | 0.512660928   | -0.7835596202 |
| H | -3.9221822146 | -0.4383601162 | -0.3790160853 |
| C | -4.048335134  | 1.646062468   | 0.1180447131  |
| H | -5.1408470361 | 1.7102951558  | 0.0864292695  |
| H | -3.6457168844 | 2.6096946101  | -0.2183010523 |
| H | -3.7579405024 | 1.5054503301  | 1.163396581   |
| C | -4.102215002  | 0.6735596879  | -2.2015562814 |
| H | -3.7809699876 | -0.1479064772 | -2.8504390676 |
| H | -3.7523757811 | 1.6126979309  | -2.6476942261 |
| H | -5.1968616277 | 0.6931436383  | -2.1955130506 |
| C | 2.3521441834  | -1.3559825157 | 0.3308276988  |
| H | 3.1666670275  | -1.5757031507 | 1.0198553668  |
| C | 2.297221391   | -2.1394974939 | -0.9527395986 |
| H | 1.4580017272  | -1.8204446168 | -1.5761415631 |
| H | 2.1940372119  | -3.2124900316 | -0.7607406766 |
| H | 3.2227181419  | -1.9804200666 | -1.5124320677 |
| C | 3.2089985453  | 2.1235463424  | 0.227131534   |
| H | 2.9178815239  | 3.1747686922  | 0.0943703238  |
| H | 3.3820652852  | 1.9570455389  | 1.2948026239  |
| H | 4.1515776088  | 1.9716651018  | -0.3066898967 |
| C | 1.9658960754  | 1.2126538185  | -1.8114857164 |
| H | 1.1701668376  | 0.5297508312  | -2.1230255449 |
| H | 1.6978908665  | 2.2214049437  | -2.1544905176 |
| H | 2.8931466622  | 0.9236852614  | -2.3152329903 |
| H | 2.8931466622  | 0.9236852614  | -2.3152329903 |

TS 6-31++G(d,p) 0069

E(UwB97XD) = -1036.73986289 A.U.

First frequency = -1583.8080  $\text{cm}^{-1}$

|   |               |               |               |
|---|---------------|---------------|---------------|
| S | 0.2835377446  | -1.3207156292 | 0.3498292667  |
| O | 0.2615824192  | -1.9205518104 | -0.9877365607 |
| O | -0.5223262185 | -1.9437758993 | 1.4040892747  |



|   |               |               |               |
|---|---------------|---------------|---------------|
| N | -0.2076062915 | 0.2509306622  | 0.2008788738  |
| C | 0.566453377   | 1.0387814482  | -0.7681326383 |
| H | 0.4505835915  | 0.5773477196  | -1.7532366167 |
| H | 0.1006433072  | 2.0279228379  | -0.8233036716 |
| C | 2.0540589912  | 1.1681633835  | -0.4240850234 |
| H | 2.2536087564  | 0.0075310299  | 0.1352820789  |
| C | -0.9687234002 | 0.9210719753  | 1.2618342354  |
| H | -0.3094066256 | 1.5735175898  | 1.8480703756  |
| H | -1.3350218102 | 0.1440918873  | 1.9333729236  |
| C | -2.1437221221 | 1.7521563404  | 0.7407436089  |
| H | -1.7723598182 | 2.5959831827  | 0.1454281553  |
| H | -2.6013106314 | 2.1984172392  | 1.6331391421  |
| C | -3.2384576191 | 1.0179988717  | -0.0567367136 |
| H | -4.077404382  | 1.7250029578  | -0.1140613061 |
| C | -2.8326367625 | 0.6955010206  | -1.5002758985 |
| H | -2.445445569  | 1.5850598249  | -2.0101360769 |
| H | -3.6985649573 | 0.3355750819  | -2.0664989706 |
| H | -2.0606573269 | -0.0778182243 | -1.5354604801 |
| C | -3.7424990652 | -0.2343799296 | 0.6659071629  |
| H | -4.6142653556 | -0.6506527219 | 0.1505407056  |
| H | -4.0364205967 | -0.0084642964 | 1.6973464154  |
| H | -2.9720603593 | -1.0122734329 | 0.697618827   |
| C | 1.9828654615  | -1.1732417913 | 0.8279087158  |
| H | 2.0307468478  | -0.8654931016 | 1.8734411289  |
| C | 2.9252567919  | -2.2626134822 | 0.3931938886  |
| H | 2.8693381961  | -2.4214272622 | -0.6859101683 |
| H | 2.7039801709  | -3.2129138277 | 0.8929179825  |
| H | 3.9478524581  | -1.9771088513 | 0.6533963995  |
| C | 2.3739557673  | 2.1618247559  | 0.6738235261  |
| H | 3.4402449497  | 2.1445323236  | 0.9182119958  |
| H | 2.1176526555  | 3.180355261   | 0.3523700417  |
| H | 1.8157389864  | 1.9507223349  | 1.590473475   |
| C | 2.9556477683  | 1.2489839781  | -1.6354041827 |
| H | 4.0095025681  | 1.2425856054  | -1.341915273  |
| H | 2.7800266519  | 0.4132354391  | -2.3199065455 |
| H | 2.7721226617  | 2.179787394   | -2.1905646557 |
| H | 2.7721226617  | 2.179787394   | -2.1905646557 |

TS 6-31++G(d,p) 0074

E(UwB97XD) = -1036.74402483 A.U.

First frequency = -1523.1104 cm<sup>-1</sup>

|   |               |               |               |
|---|---------------|---------------|---------------|
| S | 0.7670119547  | -1.635921636  | 0.5170022152  |
| O | 0.0465241268  | -2.7363751861 | -0.1320546952 |
| O | 1.2217705448  | -1.8497195162 | 1.8995381485  |
| N | -0.2166755647 | -0.2802783357 | 0.3992571453  |
| C | 0.3681917428  | 0.9154885459  | 1.0403119567  |
| H | -0.3942844751 | 1.6992072525  | 0.9934873918  |
| H | 0.5759898567  | 0.7203720482  | 2.1011693928  |
| C | 1.626940607   | 1.3864023845  | 0.3197539584  |
| H | 2.1235557288  | 0.2469974433  | -0.0420528279 |
| C | -1.6492658032 | -0.5245197041 | 0.6764648882  |
| H | -1.9313702796 | 0.0351607712  | 1.5749141928  |
| H | -1.7964540705 | -1.5813543478 | 0.9087058861  |
| C | -2.5283575265 | -0.1629663381 | -0.5184291753 |
| H | -3.5544757464 | -0.4852937154 | -0.2917991366 |
| H | -2.1891356454 | -0.7629778364 | -1.3713622255 |
| C | -2.5529800425 | 1.318719165   | -0.9173039289 |
| H | -1.5170938959 | 1.6502770677  | -1.0633611255 |
| C | -3.2830666359 | 1.4906832809  | -2.2519098445 |
| H | -3.294607053  | 2.5404653766  | -2.5630074399 |
| H | -4.3237069685 | 1.1536535586  | -2.1689732197 |
| H | -2.8028335539 | 0.9069001228  | -3.0442140329 |
| C | -3.1956453505 | 2.1977479309  | 0.1596766766  |
| H | -2.6784142207 | 2.1280184833  | 1.1222158395  |
| H | -4.239098274  | 1.9017790019  | 0.3229626332  |
| H | -3.188156314  | 3.2500994209  | -0.1421157025 |
| C | 2.1587244979  | -1.0985324826 | -0.4237725591 |
| H | 3.067738977   | -1.5095600177 | 0.0134169956  |
| C | 2.0161121112  | -1.1615692439 | -1.9203270514 |
| H | 1.0681607977  | -0.7265158135 | -2.2472010524 |
| H | 2.0611075569  | -2.1947614857 | -2.2801832294 |
| H | 2.8318112639  | -0.6022343906 | -2.3860900085 |
| C | 2.6452725186  | 2.0458814394  | 1.2220203369  |
| H | 2.2424067251  | 2.9820060767  | 1.6328830881  |
| H | 2.9111572988  | 1.3990382524  | 2.0636569404  |

|   |              |              |               |
|---|--------------|--------------|---------------|
| H | 3.5567266628 | 2.2923402982 | 0.6698589763  |
| C | 1.3612323959 | 2.1098597786 | -0.9836591148 |
| H | 0.6727821155 | 1.5455309505 | -1.6187666661 |
| H | 0.9084885154 | 3.090873643  | -0.78436615   |
| H | 2.2887844422 | 2.2747142874 | -1.5398226372 |
| H | 2.2887844422 | 2.2747142874 | -1.5398226372 |

TS 6-31++G(d,p) 0077

E(UwB97XD) = -1036.74258464 A.U.

First frequency = -1517.2076 cm<sup>-1</sup>

|   |               |               |               |
|---|---------------|---------------|---------------|
| S | 0.5137299688  | -1.4501514381 | -0.4451048146 |
| O | 1.3204481606  | -1.8278090572 | -1.6157810682 |
| O | -0.5692629443 | -2.3635412373 | -0.0656866041 |
| N | -0.1660415823 | 0.0678832824  | -0.6385708862 |
| C | 0.821423367   | 1.0842179611  | -1.0587671041 |
| H | 1.3439121333  | 0.7712469357  | -1.9723578634 |
| H | 0.2576150961  | 1.9922258886  | -1.296271357  |
| C | 1.8140396946  | 1.3795722807  | 0.0599030472  |
| H | 1.9347784534  | 0.1959763965  | 0.5637276076  |
| C | -1.4826221613 | 0.0917094555  | -1.3146746524 |
| H | -1.5390620024 | -0.669409047  | -2.1019673706 |
| H | -1.5396617419 | 1.0577964231  | -1.8214032788 |
| C | -2.660439133  | -0.0640917516 | -0.3519244775 |
| H | -2.7121439732 | -1.1040540133 | -0.0171117267 |
| H | -3.575684265  | 0.1330260329  | -0.927938903  |
| C | -2.6271290461 | 0.8535790382  | 0.8761433478  |
| H | -1.7252339163 | 0.601516235   | 1.4489192308  |
| C | -2.5532428928 | 2.3353343544  | 0.500060314   |
| H | -1.6327486266 | 2.5776096748  | -0.0400971544 |
| H | -2.5796794434 | 2.9655104381  | 1.3952471428  |
| H | -3.4016779291 | 2.6171593842  | -0.1359984407 |
| C | -3.8434142914 | 0.5821136395  | 1.7651190164  |
| H | -4.7730004755 | 0.8290830486  | 1.2373933272  |
| H | -3.8065576041 | 1.1851688998  | 2.6784743865  |
| H | -3.8933151982 | -0.4722373875 | 2.0571957023  |
| C | 1.6139728458  | -1.1225409084 | 0.896546173   |
| H | 1.0345156855  | -1.0129129015 | 1.8131142146  |

|   |              |               |               |
|---|--------------|---------------|---------------|
| C | 2.8641510939 | -1.9562528382 | 0.9638726208  |
| H | 3.4126870862 | -1.9189793541 | 0.0201374275  |
| H | 2.6416634277 | -3.0050907996 | 1.1919895181  |
| H | 3.506580681  | -1.5698769855 | 1.759155774   |
| C | 1.2335975441 | 2.2013215595  | 1.1912976516  |
| H | 1.0622382094 | 3.2343871929  | 0.8593546704  |
| H | 0.2749888763 | 1.7910177543  | 1.5222444171  |
| H | 1.9143876224 | 2.2322366511  | 2.0471936146  |
| C | 3.1832293262 | 1.8066252741  | -0.4168396394 |
| H | 3.6063710409 | 1.0800396967  | -1.1175332472 |
| H | 3.1252008378 | 2.774933505   | -0.9331667476 |
| H | 3.8727720173 | 1.9217895157  | 0.4244609755  |
| H | 3.8727720173 | 1.9217895157  | 0.4244609755  |

TS 6-31++G(d,p) 0078

E(UwB97XD) = -1036.74323252 A.U.

First frequency = -1522.6617 cm<sup>-1</sup>

|   |               |               |               |
|---|---------------|---------------|---------------|
| S | 0.7340681268  | -1.6201724854 | -0.4359398389 |
| O | 1.1599342045  | -1.875725603  | -1.820354465  |
| O | -0.2095186453 | -2.5754642239 | 0.156942227   |
| N | 0.0542154133  | -0.096991466  | -0.2678217923 |
| C | 0.9023901682  | 0.9798848917  | -0.8152919435 |
| H | 1.1726243307  | 0.7663209956  | -1.8583031601 |
| H | 0.2949794433  | 1.8912268808  | -0.8153576062 |
| C | 2.1437379997  | 1.1851990779  | 0.0423100027  |
| H | 2.395912346   | -0.0480453656 | 0.3373954194  |
| C | -1.3796610307 | 0.0088470374  | -0.5861988451 |
| H | -1.8154982105 | -0.9888068529 | -0.5157269857 |
| H | -1.5087148732 | 0.3567595299  | -1.6210591994 |
| C | -2.0737665254 | 0.9521928095  | 0.3932958126  |
| H | -1.511593793  | 1.8927389348  | 0.453048967   |
| H | -2.0397896019 | 0.5027759412  | 1.3944590506  |
| C | -3.5267556558 | 1.2728607043  | 0.0186605079  |
| H | -3.5229936318 | 1.7257041444  | -0.9833231129 |
| C | -4.4034526901 | 0.0172835739  | -0.0296200624 |
| H | -4.0779315252 | -0.6854046919 | -0.8027802315 |
| H | -5.4446575058 | 0.2807681738  | -0.2419934287 |

|   |               |               |               |
|---|---------------|---------------|---------------|
| H | -4.3784446137 | -0.5058886267 | 0.9342519565  |
| C | -4.1069973824 | 2.2973003178  | 0.9973018712  |
| H | -3.5037500326 | 3.2110737502  | 1.0217368271  |
| H | -4.1364403137 | 1.885526702   | 2.0134625447  |
| H | -5.1289459762 | 2.5731826262  | 0.7177382859  |
| C | 2.179277875   | -1.411528043  | 0.5600830995  |
| H | 1.89223673    | -1.4448474941 | 1.6108446973  |
| C | 3.396304391   | -2.1962304064 | 0.1522815199  |
| H | 3.2501815782  | -3.274107365  | 0.2876886305  |
| H | 4.2397971257  | -1.8917945209 | 0.7770118468  |
| H | 3.6508107028  | -2.0134349082 | -0.8939912668 |
| C | 1.8597296264  | 1.8409058323  | 1.3767458603  |
| H | 1.6116797581  | 2.9010165718  | 1.2304382999  |
| H | 1.0124532804  | 1.3613996662  | 1.876301164   |
| H | 2.7305697345  | 1.788737042   | 2.0369123391  |
| C | 3.3410662313  | 1.7239828865  | -0.7059557897 |
| H | 3.5787572611  | 1.1059780258  | -1.5774731414 |
| H | 3.1431272658  | 2.7442866771  | -1.0629552094 |
| H | 4.2214042369  | 1.7656378586  | -0.0580242954 |
| H | 4.2214042369  | 1.7656378586  | -0.0580242954 |

TS 6-31++G(d,p) 0079

E(UwB97XD) = -1036.74293743 A.U.

First frequency = -1519.0652 cm<sup>-1</sup>

|   |               |               |               |
|---|---------------|---------------|---------------|
| S | 0.7521251725  | -1.6847471193 | -0.1628465288 |
| O | 1.134186089   | -2.1014400804 | -1.52077533   |
| O | -0.1294202277 | -2.5879530492 | 0.5866721669  |
| N | 0.0195696013  | -0.1763272169 | -0.1604308537 |
| C | 0.8051180362  | 0.8498884553  | -0.8744654546 |
| H | 1.0441857781  | 0.5147124834  | -1.892911223  |
| H | 0.1633617543  | 1.7327969397  | -0.9627248047 |
| C | 2.0689353885  | 1.2044896402  | -0.1029044239 |
| H | 2.3791680291  | 0.028940317   | 0.3356009348  |
| C | -1.4260554675 | -0.1642278793 | -0.4470310679 |
| H | -1.8303827319 | -1.1540857249 | -0.2235915101 |
| H | -1.584861554  | 0.0271772014  | -1.5157007023 |
| C | -2.1319135925 | 0.8722391292  | 0.4238170895  |

|   |               |               |               |
|---|---------------|---------------|---------------|
| H | -1.7173046467 | 1.8722761317  | 0.2341226403  |
| H | -1.910547648  | 0.6329362757  | 1.4704536133  |
| C | -3.6527900178 | 0.923053623   | 0.2214567485  |
| H | -4.0479181091 | -0.0906839617 | 0.378568481   |
| C | -4.2877569086 | 1.8442704775  | 1.2667087434  |
| H | -4.0504023172 | 1.515574503   | 2.2838909969  |
| H | -5.3774059742 | 1.8650533562  | 1.1622532351  |
| H | -3.919841175  | 2.8710443372  | 1.149319258   |
| C | -4.038123862  | 1.3726869472  | -1.1918954814 |
| H | -3.6121276    | 2.3601344038  | -1.4093043979 |
| H | -5.1259363884 | 1.4483065497  | -1.2899262934 |
| H | -3.6867398961 | 0.6771548235  | -1.9597601187 |
| C | 2.225038544   | -1.3017553347 | 0.7360356681  |
| H | 1.9805854816  | -1.212107885  | 1.7942154609  |
| C | 3.4556893974  | -2.0885488737 | 0.3760146115  |
| H | 3.3575116278  | -3.1457551579 | 0.6483828928  |
| H | 4.3096550695  | -1.6800780961 | 0.9221915678  |
| H | 3.6627557702  | -2.0281874094 | -0.6947041463 |
| C | 1.810885159   | 2.0165563315  | 1.1482560353  |
| H | 1.5184685761  | 3.0406915425  | 0.8791876505  |
| H | 1.001074379   | 1.5780693325  | 1.7392578999  |
| H | 2.707056346   | 2.077216223   | 1.7728883502  |
| C | 3.2155552853  | 1.6814125645  | -0.9641766305 |
| H | 3.44460415    | 0.9631792668  | -1.7577166632 |
| H | 2.9644729515  | 2.6388054175  | -1.4416367033 |
| H | 4.1171113711  | 1.837534402   | -0.3647760075 |
| H | 4.1171113711  | 1.837534402   | -0.3647760075 |

TS 6-31++G(d,p) 0083

E(UwB97XD) = -1036.74174708 A.U.

First frequency = -1595.4871 cm<sup>-1</sup>

|   |               |               |               |
|---|---------------|---------------|---------------|
| S | 0.5347617842  | -1.480426708  | 0.4275846944  |
| O | 0.512653835   | -2.2150503774 | -0.8409639277 |
| O | -0.1422408016 | -2.067231117  | 1.587832476   |
| N | -0.1385403943 | 0.0071617249  | 0.1692548037  |
| C | 0.5123293594  | 0.7997289487  | -0.8814282446 |
| H | 0.4895322288  | 0.2239126724  | -1.8112486954 |

|   |               |               |               |
|---|---------------|---------------|---------------|
| H | -0.1025255654 | 1.6916522484  | -1.0426473232 |
| C | 1.9539880966  | 1.1862323162  | -0.5444319292 |
| H | 2.3257601359  | 0.0779360987  | 0.038166418   |
| C | -0.9562580821 | 0.6509572639  | 1.2083816484  |
| H | -0.7338898441 | 1.721199336   | 1.1752888756  |
| H | -0.6472589822 | 0.2938066822  | 2.1941725811  |
| C | -2.4501767618 | 0.3966778203  | 1.0148366663  |
| H | -2.9877703484 | 0.8670123142  | 1.8503863739  |
| H | -2.620626677  | -0.6831993547 | 1.0952432036  |
| C | -3.0292063475 | 0.9062260327  | -0.3115518192 |
| H | -2.4094316184 | 0.5013219775  | -1.1234700442 |
| C | -4.453501053  | 0.3788123653  | -0.5038629019 |
| H | -5.1102490819 | 0.7376588397  | 0.2983514758  |
| H | -4.4750539065 | -0.7158613681 | -0.4919352027 |
| H | -4.874087221  | 0.7160908431  | -1.4570022854 |
| C | -3.0109805399 | 2.4353737726  | -0.4022042061 |
| H | -3.4143745327 | 2.7729369714  | -1.3623605434 |
| H | -2.0019465045 | 2.8500217542  | -0.3070789179 |
| H | -3.6253217889 | 2.874050918   | 0.3937431211  |
| C | 2.2289917477  | -1.0979390265 | 0.7849701991  |
| H | 2.2986291413  | -0.7374493476 | 1.8121442795  |
| C | 3.2736937899  | -2.0840347646 | 0.3372565482  |
| H | 4.2657315973  | -1.6618157659 | 0.5177763637  |
| H | 3.1742972834  | -2.3037069528 | -0.7279638849 |
| H | 3.2039724269  | -3.0277294022 | 0.8906119052  |
| C | 2.0951276114  | 2.2316296541  | 0.5421374292  |
| H | 1.5745574555  | 1.9375027113  | 1.4588015725  |
| H | 3.14748395    | 2.3969026732  | 0.7911419487  |
| H | 1.672775798   | 3.189288659   | 0.2082668623  |
| C | 2.8336993054  | 1.3975544504  | -1.7549832501 |
| H | 2.5053373527  | 2.2813782855  | -2.320003428  |
| H | 3.8740943644  | 1.5631615274  | -1.4602527825 |
| H | 2.7964900483  | 0.5376421775  | -2.431055178  |
| H | 2.7964900483  | 0.5376421775  | -2.431055178  |

TS 6-31++G(d,p) 0085

E(UwB97XD) = -1036.74071217 A.U.

First frequency = -1586.6414  $\text{cm}^{-1}$

|   |               |               |               |
|---|---------------|---------------|---------------|
| S | 0.8023300166  | -1.7618219536 | -0.0367457237 |
| O | 1.6419386798  | -2.2349342276 | -1.1389276913 |
| O | -0.1001768545 | -2.71216265   | 0.6174695442  |
| N | -0.1359699453 | -0.5127052446 | -0.6390504097 |
| C | 0.6895505211  | 0.5307911711  | -1.2841906139 |
| H | 1.2275315614  | 0.0419813552  | -2.0987102032 |
| H | 0.0043466173  | 1.2483105714  | -1.7438166251 |
| C | 1.6888805685  | 1.2442254566  | -0.3622503582 |
| H | 1.9237093522  | 0.2823703015  | 0.4884268277  |
| C | -1.2474828988 | -0.0940872714 | 0.241508363   |
| H | -0.873818702  | 0.3435067479  | 1.1767289181  |
| H | -1.7962383985 | -1.0006227379 | 0.5037576971  |
| C | -2.1928870606 | 0.8765633994  | -0.4584113059 |
| H | -2.3993263242 | 0.4956951388  | -1.4659120672 |
| H | -1.7192299148 | 1.8603330892  | -0.5747639242 |
| C | -3.5188615581 | 1.0694156752  | 0.2921835945  |
| H | -4.0023745034 | 0.0865379451  | 0.3801346881  |
| C | -3.3086440163 | 1.627654865   | 1.7035952588  |
| H | -4.270406523  | 1.8214145675  | 2.1892543327  |
| H | -2.755594357  | 2.5745562506  | 1.6636125253  |
| H | -2.7507753559 | 0.9370282793  | 2.3433037079  |
| C | -4.4451451841 | 1.9826934566  | -0.514681108  |
| H | -4.0059275366 | 2.9822884648  | -0.6199447379 |
| H | -5.4149466651 | 2.0934018163  | -0.019097157  |
| H | -4.6209606089 | 1.5841041022  | -1.5193014184 |
| C | 1.8520828503  | -0.9504854664 | 1.1418621744  |
| H | 1.2822742152  | -0.7390158767 | 2.0472615571  |
| C | 3.2377462751  | -1.5077303839 | 1.3289098821  |
| H | 3.2157746712  | -2.4962311801 | 1.8019662202  |
| H | 3.8084314021  | -0.8378728378 | 1.9772523798  |
| H | 3.7578372767  | -1.5970501475 | 0.3726627036  |
| C | 1.1354970926  | 2.4032091789  | 0.4427839432  |
| H | 0.2433220694  | 2.1328520282  | 1.0128452359  |
| H | 1.8839266011  | 2.7831207777  | 1.1445849066  |
| H | 0.8606682635  | 3.2272081454  | -0.2300898979 |
| C | 3.0173723111  | 1.5359313726  | -1.0274586216 |
| H | 2.8881741841  | 2.2658390485  | -1.8387617534 |
| H | 3.7306769451  | 1.9582387534  | -0.313413829  |



|   |             |              |               |
|---|-------------|--------------|---------------|
| H | 3.453633093 | 0.6307803613 | -1.4613156661 |
| H | 3.453633093 | 0.6307803613 | -1.4613156661 |

TS 6-31++G(d,p) 0086

E(UwB97XD) = -1036.74281446 A.U.

First frequency = -1506.2510  $\text{cm}^{-1}$

|   |               |               |               |
|---|---------------|---------------|---------------|
| S | 0.6535884631  | -1.6606495527 | -0.1563657248 |
| O | 1.1929916732  | -2.057139063  | -1.4662752087 |
| O | -0.161538295  | -2.653838242  | 0.5531985695  |
| N | -0.2735240953 | -0.2654679837 | -0.2684125711 |
| C | 0.4259957614  | 0.844202505   | -0.9494804254 |
| H | 0.7582631503  | 0.5343606382  | -1.9498347393 |
| H | -0.3098663474 | 1.6431567844  | -1.0823151615 |
| C | 1.5984001256  | 1.359633097   | -0.1243497475 |
| H | 2.0216180113  | 0.2469698514  | 0.3718672373  |
| C | -1.6736882403 | -0.494136111  | -0.6916170724 |
| H | -1.8426891399 | -1.5666820172 | -0.808133024  |
| H | -1.8186810041 | -0.0458572599 | -1.6808334701 |
| C | -2.6737504993 | 0.0433867383  | 0.3296654802  |
| H | -2.4686444983 | -0.4527219083 | 1.285715681   |
| H | -3.6774329611 | -0.2762494052 | 0.0155330724  |
| C | -2.685228927  | 1.5639298548  | 0.5383838239  |
| H | -1.663048496  | 1.8855430703  | 0.7751202625  |
| C | -3.1542906815 | 2.3157628558  | -0.7107781665 |
| H | -2.5276561533 | 2.1104248243  | -1.5848636061 |
| H | -3.1393077148 | 3.3973498907  | -0.5420196889 |
| H | -4.1816994946 | 2.0291438458  | -0.9663704155 |
| C | -3.5674496663 | 1.9208522271  | 1.7377020628  |
| H | -3.5759161588 | 3.0015975162  | 1.9133367571  |
| H | -3.2121762371 | 1.4312379538  | 2.6504926808  |
| H | -4.6023005708 | 1.6006677415  | 1.5646170409  |
| C | 1.9894709992  | -1.0703511487 | 0.8360158232  |
| H | 1.6478066135  | -0.9621234673 | 1.8650889176  |
| C | 3.3274795066  | -1.7222257073 | 0.6171292316  |
| H | 3.6173562987  | -1.6828436546 | -0.435122657  |
| H | 3.3260634407  | -2.7711842869 | 0.9352649593  |
| H | 4.0795321542  | -1.1941132238 | 1.2085855307  |

|   |              |              |               |
|---|--------------|--------------|---------------|
| C | 1.1950056974 | 2.1644321082 | 1.0930520915  |
| H | 0.4548185071 | 1.6263178231 | 1.6928794791  |
| H | 2.0614620169 | 2.3812528625 | 1.7248004246  |
| H | 0.7527746124 | 3.1222233898 | 0.7868379802  |
| C | 2.7221484893 | 1.9481510502 | -0.9463349536 |
| H | 2.3848141807 | 2.8585576232 | -1.4611517017 |
| H | 3.5697246199 | 2.2222302291 | -0.3116413936 |
| H | 3.0706050886 | 1.2440332108 | -1.708305816  |
| H | 3.0706050886 | 1.2440332108 | -1.708305816  |

TS 6-31++G(d,p) 0094

E(UwB97XD) = -1036.74341316 A.U.

First frequency = -1534.3644 cm<sup>-1</sup>

|   |               |               |               |
|---|---------------|---------------|---------------|
| S | 0.443385018   | -1.2014066253 | 0.3056710507  |
| O | 0.2613928752  | -1.5213652102 | -1.1181633142 |
| O | -0.3361157616 | -1.9842229669 | 1.2718716705  |
| N | 0.1289299932  | 0.4106693978  | 0.6274503704  |
| C | 0.826544584   | 1.3394833101  | -0.2819173944 |
| H | 0.6113267037  | 1.1055415304  | -1.3320979334 |
| H | 0.4222895111  | 2.3375010323  | -0.0766087919 |
| C | 2.329266321   | 1.3212099294  | -0.0233418624 |
| H | 2.4840833868  | 0.063912889   | 0.2433855128  |
| C | -1.2572424721 | 0.7485335586  | 0.9852322054  |
| H | -1.2083524552 | 1.7376469518  | 1.4548582588  |
| H | -1.5715792811 | 0.0412448416  | 1.7542565489  |
| C | -2.24449722   | 0.7673195952  | -0.1826766604 |
| H | -2.3444473271 | -0.2467621298 | -0.592024988  |
| H | -1.8371942188 | 1.3927879841  | -0.98678074   |
| C | -3.6333117795 | 1.298104779   | 0.1991129695  |
| H | -3.5044306983 | 2.3077230341  | 0.6158147269  |
| C | -4.514021427  | 1.4114360495  | -1.04809102   |
| H | -4.052669639  | 2.0553094845  | -1.8043435258 |
| H | -5.4955363022 | 1.82859531    | -0.8001968559 |
| H | -4.672553884  | 0.4238149795  | -1.4979296357 |
| C | -4.3149091253 | 0.4277040483  | 1.2602580608  |
| H | -3.7641772115 | 0.4179549588  | 2.2056859667  |
| H | -4.4003771614 | -0.6079939883 | 0.9092987916  |

|   |               |               |               |
|---|---------------|---------------|---------------|
| H | -5.3242724716 | 0.7955947333  | 1.4715075303  |
| C | 2.1759402826  | -1.2368698852 | 0.6520947475  |
| H | 2.3242244543  | -1.1981653913 | 1.7310509091  |
| C | 3.0004116597  | -2.2279750932 | -0.1229417197 |
| H | 2.8457607941  | -2.1129196542 | -1.1979546964 |
| H | 2.758347725   | -3.2613380515 | 0.1511977569  |
| H | 4.0574626001  | -2.0616683499 | 0.0995739899  |
| C | 2.7381952338  | 2.0209585955  | 1.2551198818  |
| H | 2.6334942794  | 3.1083908306  | 1.1406283605  |
| H | 2.1083634196  | 1.7058783343  | 2.0926357644  |
| H | 3.7821589513  | 1.8096858483  | 1.505351629   |
| C | 3.1777585555  | 1.6323612908  | -1.2345719432 |
| H | 4.2417243073  | 1.518492711   | -1.0074305562 |
| H | 2.9288922293  | 0.9771571913  | -2.0752504364 |
| H | 3.0170552985  | 2.669763704   | -1.5596417644 |
| H | 3.0170552985  | 2.669763704   | -1.5596417644 |

TS 6-31++G(d,p) 0095

E(UwB97XD) = -1036.74368071 A.U.

First frequency = -1544.0625  $\text{cm}^{-1}$

|   |               |               |               |
|---|---------------|---------------|---------------|
| S | 0.4245391635  | -1.4183120729 | 0.0072420271  |
| O | 0.0059372487  | -2.4665320741 | -0.9293643781 |
| O | -0.1094673829 | -1.4738316931 | 1.376182319   |
| N | 0.0723977784  | 0.0395777844  | -0.7198119816 |
| C | 0.4440188879  | 1.2150819474  | 0.0857685654  |
| H | 0.0238445791  | 2.0916462575  | -0.4179295348 |
| H | 0.0028650891  | 1.1678863875  | 1.0886544131  |
| C | 1.9604684943  | 1.3483470001  | 0.1837528586  |
| H | 2.2709800165  | 0.0908030063  | 0.2954416875  |
| C | -1.1008892893 | 0.0942080982  | -1.6067590113 |
| H | -0.9463339831 | -0.6489777157 | -2.3922763436 |
| H | -1.0549745122 | 1.0755167023  | -2.0878516815 |
| C | -2.4683994148 | -0.1460089238 | -0.9618859293 |
| H | -2.4793498351 | -1.1607018419 | -0.5464735949 |
| H | -3.2108531936 | -0.1393824977 | -1.7727835357 |
| C | -2.9145326551 | 0.8443379682  | 0.1223452001  |
| H | -2.1514995864 | 0.8593425793  | 0.9104277443  |

|   |               |               |               |
|---|---------------|---------------|---------------|
| C | -3.0839265164 | 2.2657401016  | -0.4214658367 |
| H | -3.8455738404 | 2.284626778   | -1.2107632591 |
| H | -2.158004797  | 2.6668563037  | -0.8449929914 |
| H | -3.4048831064 | 2.9493067195  | 0.3711323468  |
| C | -4.2197623618 | 0.3598454828  | 0.7603251538  |
| H | -5.0204336021 | 0.3099173072  | 0.0120167778  |
| H | -4.5453025015 | 1.0387416867  | 1.5553109985  |
| H | -4.1008812806 | -0.6383286361 | 1.1943625884  |
| C | 2.1833347377  | -1.2953729122 | 0.1347996313  |
| H | 2.5102929349  | -1.7326970899 | 1.0772913075  |
| C | 2.9645807525  | -1.649968526  | -1.1018071608 |
| H | 2.9490731323  | -2.7288127498 | -1.288006345  |
| H | 4.0053459968  | -1.3412055408 | -0.9724458371 |
| H | 2.5631341229  | -1.1446332838 | -1.984034963  |
| C | 2.4471401999  | 2.0377332944  | 1.4375369895  |
| H | 2.1229787272  | 3.087691988   | 1.4470733802  |
| H | 2.0508513037  | 1.5576723189  | 2.3376590049  |
| H | 3.5396947651  | 2.0291883832  | 1.4904269075  |
| C | 2.6186726087  | 1.8048752013  | -1.1001425322 |
| H | 2.4339474201  | 2.8770652374  | -1.2535147822 |
| H | 3.7019074479  | 1.6539925518  | -1.0685457973 |
| H | 2.216267726   | 1.2675977102  | -1.9638279057 |
| H | 2.216267726   | 1.2675977102  | -1.9638279057 |

TS 6-31++G(d,p) 0096

E(UwB97XD) = -1036.74047781 A.U.

First frequency = -1593.2386 cm<sup>-1</sup>

|   |               |               |               |
|---|---------------|---------------|---------------|
| S | 0.6281025607  | -1.4780782095 | -0.0440875479 |
| O | 1.1051061855  | -2.083135698  | -1.2908378202 |
| O | -0.3866043814 | -2.1893918221 | 0.7383733588  |
| N | 0.0052817413  | 0.0119424114  | -0.4150845927 |
| C | 0.9498238167  | 0.9120597032  | -1.0920988645 |
| H | 1.2808762228  | 0.4255312882  | -2.0135049651 |
| H | 0.3867667689  | 1.8053986086  | -1.3850549244 |
| C | 2.1668449682  | 1.2861843081  | -0.2408021587 |
| H | 2.3554138048  | 0.141305622   | 0.3577566161  |
| C | -1.090961476  | 0.5692335785  | 0.3938755984  |

|   |               |               |               |
|---|---------------|---------------|---------------|
| H | -0.9097461733 | 1.643918375   | 0.4710148273  |
| H | -1.0582669885 | 0.16569337    | 1.4115926528  |
| C | -2.4555867747 | 0.2974460606  | -0.232955403  |
| H | -2.5527490028 | -0.7841359915 | -0.3784572509 |
| H | -2.4870350837 | 0.7597165245  | -1.2295324598 |
| C | -3.636612634  | 0.8042075103  | 0.6053519505  |
| H | -3.5728848173 | 0.330215124   | 1.5955341485  |
| C | -3.6033002598 | 2.3238084849  | 0.8016878284  |
| H | -4.4883854976 | 2.6628722522  | 1.3498509654  |
| H | -3.5927102368 | 2.8361690751  | -0.1684817612 |
| H | -2.7241661745 | 2.6510100757  | 1.3656009337  |
| C | -4.9585507749 | 0.3760104245  | -0.0374198965 |
| H | -5.8126621067 | 0.6892005617  | 0.5719725293  |
| H | -5.0077556932 | -0.7111402967 | -0.1582771572 |
| H | -5.0691544678 | 0.8306282044  | -1.0295631969 |
| C | 2.0557337626  | -1.094520729  | 0.9355929056  |
| H | 1.7330297991  | -0.8227995735 | 1.9415121863  |
| C | 3.2397363715  | -2.0171194177 | 0.8277112288  |
| H | 4.0773788803  | -1.5918952664 | 1.3866904476  |
| H | 3.5420563468  | -2.1458994967 | -0.2137672027 |
| H | 3.0224454419  | -3.0061015889 | 1.2476010084  |
| C | 1.8890434623  | 2.2472724215  | 0.896756474   |
| H | 1.5639719235  | 3.2205696294  | 0.5046164835  |
| H | 1.1045792821  | 1.8766949791  | 1.5635917957  |
| H | 2.7892268583  | 2.4105523669  | 1.4965974037  |
| C | 3.4053474697  | 1.5982290495  | -1.0496112544 |
| H | 3.6390864933  | 0.7904632531  | -1.7501799207 |
| H | 3.2611950213  | 2.5171783364  | -1.6352618084 |
| H | 4.2705293326  | 1.7547847071  | -0.3987340199 |
| H | 4.2705293326  | 1.7547847071  | -0.3987340199 |

TS 6-31++G(d,p) 0097

E(UwB97XD) = -1036.74116917 A.U.

First frequency = -1510.9147 cm<sup>-1</sup>

|   |              |               |              |
|---|--------------|---------------|--------------|
| S | 0.6404645833 | -1.2281352306 | 1.0323313895 |
| O | -0.36471402  | -2.2843943268 | 0.8821211124 |
| O | 1.2867379616 | -1.098825215  | 2.3473852333 |

|   |               |               |               |
|---|---------------|---------------|---------------|
| N | -0.0924026067 | 0.2176866843  | 0.5728250224  |
| C | 0.8002675167  | 1.3811473936  | 0.7740847462  |
| H | 0.2145999866  | 2.2672942548  | 0.5065971952  |
| H | 1.0809369911  | 1.4759981148  | 1.8315479509  |
| C | 2.0444454303  | 1.3136904653  | -0.1087927787 |
| H | 2.2230775392  | 0.0363386188  | -0.1867269146 |
| C | -1.4662801016 | 0.3728501871  | 1.1137117417  |
| H | -1.6090462992 | 1.4426705612  | 1.2937729525  |
| H | -1.5454255257 | -0.1110016206 | 2.0940490744  |
| C | -2.5598195638 | -0.1492377101 | 0.1775629933  |
| H | -3.413327451  | -0.4457901924 | 0.7996386206  |
| H | -2.2016534945 | -1.0621409168 | -0.3104643396 |
| C | -3.0608478653 | 0.8449290607  | -0.878721985  |
| H | -3.4557269321 | 1.7238930642  | -0.34794752   |
| C | -1.9536819195 | 1.3232608725  | -1.819861073  |
| H | -1.4733012401 | 0.4716278949  | -2.3167044124 |
| H | -1.1770934395 | 1.877434901   | -1.2866982091 |
| H | -2.3609130036 | 1.9831135018  | -2.5933913823 |
| C | -4.2098807164 | 0.2217191564  | -1.6761204352 |
| H | -3.8597042355 | -0.6566231356 | -2.2321697755 |
| H | -4.6202920129 | 0.9344378551  | -2.3990523492 |
| H | -5.0238639286 | -0.1004787924 | -1.0179852917 |
| C | 1.9146926169  | -1.3287624752 | -0.1788723297 |
| H | 2.7814710752  | -1.8300888739 | 0.2499586261  |
| C | 1.4871699994  | -1.7295903394 | -1.5642979902 |
| H | 0.6109021021  | -1.1604777954 | -1.8859682957 |
| H | 1.2405545144  | -2.7955408169 | -1.6105836119 |
| H | 2.3023705972  | -1.5370112616 | -2.266717222  |
| C | 3.2868901196  | 1.887074318   | 0.5354612499  |
| H | 3.1671782482  | 2.9665613728  | 0.7022824165  |
| H | 3.4850928651  | 1.4192059887  | 1.5045916033  |
| H | 4.1617307759  | 1.7465251452  | -0.1059097784 |
| C | 1.8152934488  | 1.737243659   | -1.5446512144 |
| H | 1.6344126768  | 2.8197888608  | -1.5942889442 |
| H | 2.6889712993  | 1.5143991122  | -2.1643452517 |
| H | 0.946659474   | 1.2329557572  | -1.9753171882 |
| H | 0.946659474   | 1.2329557572  | -1.9753171882 |

TS 6-31++G(d,p) 0103

E(UwB97XD) = -1036.73972866 A.U.

First frequency = -1497.7592 cm<sup>-1</sup>

|   |               |               |               |
|---|---------------|---------------|---------------|
| S | 0.4243065154  | -1.4666720241 | -0.4565585341 |
| O | 1.2115490384  | -1.909819042  | -1.6173530719 |
| O | -0.7245856012 | -2.2966389439 | -0.0791074237 |
| N | -0.1510913519 | 0.093025634   | -0.6688871362 |
| C | 0.9024681679  | 1.0442589767  | -1.0840622671 |
| H | 1.3935027707  | 0.7070986159  | -2.0068119191 |
| H | 0.3956036544  | 1.9897191705  | -1.3023898192 |
| C | 1.9235602367  | 1.2645236158  | 0.0265962276  |
| H | 1.9415133127  | 0.0869538543  | 0.552870881   |
| C | -1.4342530643 | 0.1773992544  | -1.4047383989 |
| H | -1.5192388164 | -0.6283082472 | -2.1435317242 |
| H | -1.3917167568 | 1.1108396128  | -1.9723014588 |
| C | -2.6655948005 | 0.1999030104  | -0.5015769821 |
| H | -2.8140906491 | -0.7887984825 | -0.0554439263 |
| H | -3.5225100663 | 0.3770985032  | -1.1638375668 |
| C | -2.626991736  | 1.2740378236  | 0.6046025361  |
| H | -1.935508762  | 2.0684132415  | 0.2872187337  |
| C | -4.0070395887 | 1.9074547897  | 0.8042950543  |
| H | -4.7438096403 | 1.1433544146  | 1.0811323091  |
| H | -4.3574826212 | 2.3954518189  | -0.1114155207 |
| H | -3.9865785993 | 2.6571574888  | 1.602675437   |
| C | -2.1116568666 | 0.7004681236  | 1.9281819477  |
| H | -2.0040235676 | 1.4855690934  | 2.6848751817  |
| H | -1.1427827374 | 0.2134815532  | 1.7947094449  |
| H | -2.8129503655 | -0.0485010323 | 2.31583617    |
| C | 1.5335246418  | -1.2054648417 | 0.8920693487  |
| H | 0.9590202422  | -1.0579076723 | 1.8064721076  |
| C | 2.7278538227  | -2.1166647544 | 0.9695363436  |
| H | 3.3864562909  | -1.7714380113 | 1.7704291488  |
| H | 3.2855895716  | -2.1143903454 | 0.0305219445  |
| H | 2.437220974   | -3.1491821627 | 1.1952761223  |
| C | 1.4302485665  | 2.1653911809  | 1.1391973736  |
| H | 1.3865132755  | 3.2056162173  | 0.7887966156  |
| H | 0.4266253442  | 1.8764052601  | 1.4633768165  |

|   |              |              |               |
|---|--------------|--------------|---------------|
| H | 2.1000030457 | 2.1309421526 | 2.0037346961  |
| C | 3.3257096108 | 1.5484110236 | -0.4620613651 |
| H | 3.3569369772 | 2.5035521143 | -1.0044557744 |
| H | 4.025421076  | 1.6209443806 | 0.3756398531  |
| H | 3.6766226603 | 0.7666961286 | -1.1430111502 |
| H | 3.6766226603 | 0.7666961286 | -1.1430111502 |

TS 6-31++G(d,p) 0109

E(UwB97XD) = -1036.74323252 A.U.

First frequency = -1522.6526  $\text{cm}^{-1}$

|   |               |               |               |
|---|---------------|---------------|---------------|
| S | 0.5370597521  | -1.5732779578 | -0.2729888317 |
| O | 0.9748497139  | -1.7868431727 | -1.6607971936 |
| O | -0.4950157089 | -2.4788396362 | 0.2458780226  |
| N | -0.0212825463 | -0.010887299  | -0.0328251888 |
| C | 0.9243883495  | 1.0209644095  | -0.5015956392 |
| H | 1.2018085544  | 0.8433681331  | -1.5494584427 |
| H | 0.3928961544  | 1.9777546425  | -0.4621419595 |
| C | 2.1569449059  | 1.0763798841  | 0.3907685482  |
| H | 2.3010150483  | -0.1877305731 | 0.6209211842  |
| C | -1.4335770006 | 0.229553944   | -0.3736594994 |
| H | -1.9503328298 | -0.7312618273 | -0.3681343812 |
| H | -1.5084465722 | 0.6425768931  | -1.3897543032 |
| C | -2.0730722949 | 1.1721352489  | 0.6430582781  |
| H | -1.438163863  | 2.0585520154  | 0.7671279992  |
| H | -2.1005695899 | 0.6676030027  | 1.6178132003  |
| C | -3.4855141449 | 1.6312253856  | 0.2575717509  |
| H | -3.4201942508 | 2.13569705    | -0.7172601314 |
| C | -4.4597484588 | 0.4566058878  | 0.1214380343  |
| H | -4.1730030287 | -0.2279638675 | -0.6827097911 |
| H | -5.4704589493 | 0.8160491657  | -0.0974202805 |
| H | -4.5015287211 | -0.1178787753 | 1.0550354277  |
| C | -4.0047661215 | 2.6456114013  | 1.279966152   |
| H | -4.9938876746 | 3.0191646299  | 0.9958112648  |
| H | -3.3303427295 | 3.5041003659  | 1.3673471385  |
| H | -4.0923132236 | 2.1834763314  | 2.2708113598  |
| C | 1.9694070969  | -1.5387501027 | 0.76209026    |
| H | 1.6547359742  | -1.6055921271 | 1.8033019619  |



|   |              |               |               |
|---|--------------|---------------|---------------|
| C | 3.1285807372 | -2.3974979486 | 0.3353684226  |
| H | 3.4221106649 | -2.1802860986 | -0.6939669325 |
| H | 2.8926948229 | -3.4654829146 | 0.407951273   |
| H | 3.9786341092 | -2.1971422032 | 0.9924251795  |
| C | 1.8944683083 | 1.6795420684  | 1.7540753682  |
| H | 1.7368458712 | 2.7628650211  | 1.6627816505  |
| H | 0.9991258165 | 1.2449015149  | 2.2088433877  |
| H | 2.741787294  | 1.5199689449  | 2.4274920767  |
| C | 3.4119949924 | 1.55462296    | -0.3019856354 |
| H | 4.2766096624 | 1.4887319265  | 0.3648300751  |
| H | 3.6202475786 | 0.9671808387  | -1.2017154525 |
| H | 3.3061225212 | 2.6055363279  | -0.6053406948 |
| H | 3.3061225212 | 2.6055363279  | -0.6053406948 |

TS 6-31++G(d,p) 0110

E(UwB97XD) = -1036.74293736 A.U.

First frequency = -1519.1285  $\text{cm}^{-1}$

|   |               |               |               |
|---|---------------|---------------|---------------|
| S | 0.5705470022  | -1.6144039285 | -0.0323680016 |
| O | 0.9886604588  | -1.9679300207 | -1.3975678717 |
| O | -0.4054425664 | -2.4996500277 | 0.6145175497  |
| N | -0.0572351492 | -0.0611838788 | 0.0409873951  |
| C | 0.8297584943  | 0.9509173422  | -0.5664276325 |
| H | 1.0945814223  | 0.6663872756  | -1.5938706609 |
| H | 0.2543918651  | 1.8809676777  | -0.6224123896 |
| C | 2.0758899077  | 1.1642016329  | 0.2820680859  |
| H | 2.2840641591  | -0.0563577271 | 0.6526501276  |
| C | -1.4832123251 | 0.0721469822  | -0.3067898948 |
| H | -1.9640556646 | -0.8990659868 | -0.169812832  |
| H | -1.5769099145 | 0.3439838888  | -1.3656711203 |
| C | -2.1583245188 | 1.0967870722  | 0.6016149626  |
| H | -1.6678242833 | 2.0750390158  | 0.499650092   |
| H | -2.0048632632 | 0.7741026666  | 1.6379696997  |
| C | -3.660587048  | 1.2689800076  | 0.3367533516  |
| H | -4.1310197289 | 0.2778493458  | 0.4062390777  |
| C | -4.2812870072 | 2.1625133499  | 1.4141168407  |
| H | -3.8390567595 | 3.1659701504  | 1.3838846083  |
| H | -4.1164564339 | 1.7517438479  | 2.4156840629  |

|   |               |               |               |
|---|---------------|---------------|---------------|
| H | -5.3606442077 | 2.2676295675  | 1.2637276742  |
| C | -3.9453879412 | 1.8367158232  | -1.0577999669 |
| H | -3.4431972372 | 2.8035179573  | -1.1877656411 |
| H | -5.0194987379 | 1.995768563   | -1.1979905322 |
| H | -3.6052543961 | 1.1699039148  | -1.8556215986 |
| C | 2.0208861528  | -1.3960975573 | 0.9540636829  |
| H | 1.7322551753  | -1.3585886907 | 2.004215746   |
| C | 3.2113938329  | -2.2428614145 | 0.5951037887  |
| H | 3.0288141459  | -3.3059877797 | 0.7898713629  |
| H | 4.0636609986  | -1.9324073555 | 1.2047551764  |
| H | 3.473578907   | -2.1275300939 | -0.4588965419 |
| C | 1.8132721215  | 1.9095991876  | 1.5731389641  |
| H | 0.9478130642  | 1.4923339912  | 2.0967938106  |
| H | 2.6801405189  | 1.8657207532  | 2.2391589674  |
| H | 1.6045714499  | 2.9672349051  | 1.3619257718  |
| C | 3.2925387869  | 1.613538297   | -0.49371558   |
| H | 3.1302443764  | 2.6151757731  | -0.9156089734 |
| H | 4.1724907208  | 1.6663796482  | 0.1538563873  |
| H | 3.5106361551  | 0.9337629451  | -1.3233952757 |
| H | 3.5106361551  | 0.9337629451  | -1.3233952757 |

TS 6-31++G(d,p) 0125

E(UwB97XD) = -1036.74258464 A.U.

First frequency = -1517.6986  $\text{cm}^{-1}$

|   |               |               |               |
|---|---------------|---------------|---------------|
| S | 0.5770338165  | -1.4086837927 | -0.9142718217 |
| O | 1.3280075961  | -1.661903705  | -2.1535536605 |
| O | -0.453789345  | -2.3877529431 | -0.5538079244 |
| N | -0.159684142  | 0.094785863   | -0.9455363147 |
| C | 0.7703727103  | 1.1761669803  | -1.3331534818 |
| H | 1.2500673115  | 0.9564878208  | -2.2960743609 |
| H | 0.1660137105  | 2.0796226544  | -1.4645980576 |
| C | 1.8146476284  | 1.4159808135  | -0.2487499709 |
| H | 2.0004925631  | 0.2007296013  | 0.1489594138  |
| C | -1.5122630279 | 0.1257865994  | -1.5460953522 |
| H | -1.5890352734 | -0.5708992743 | -2.3893318429 |
| H | -1.6279094478 | 1.1269392328  | -1.9676106258 |
| C | -2.6285976058 | -0.1490261479 | -0.5378021478 |

|   |               |               |               |
|---|---------------|---------------|---------------|
| H | -2.6283509098 | -1.2136084892 | -0.2868867503 |
| H | -3.5805506367 | 0.0602418211  | -1.0460481689 |
| C | -2.5554625457 | 0.6680634944  | 0.7577416909  |
| H | -1.6152466158 | 0.40374782    | 1.2588989874  |
| C | -2.5497658599 | 2.1768832046  | 0.5009586747  |
| H | -2.5463615484 | 2.7319336816  | 1.4449329658  |
| H | -3.440790136  | 2.4778947994  | -0.0641129464 |
| H | -1.6688857869 | 2.4948272294  | -0.06538613   |
| C | -3.7106312488 | 0.2824876201  | 1.6852247381  |
| H | -4.6757753308 | 0.5371826909  | 1.2299794641  |
| H | -3.6416051048 | 0.8113727771  | 2.6416595781  |
| H | -3.7105995397 | -0.7929859492 | 1.8921348636  |
| C | 1.7402319808  | -1.1508496572 | 0.3889582555  |
| H | 1.2099964462  | -1.1358779864 | 1.3410689743  |
| C | 3.0175322658  | -1.9422917139 | 0.3207164252  |
| H | 2.8410242866  | -3.0131631647 | 0.4745883354  |
| H | 3.6917200343  | -1.5976751213 | 1.1088746562  |
| H | 3.5102330968  | -1.8107449935 | -0.6451295402 |
| C | 1.2732903133  | 2.1231975339  | 0.9755972067  |
| H | 0.347887358   | 1.6539532078  | 1.322377978   |
| H | 1.9996567869  | 2.1095141167  | 1.7936384033  |
| H | 1.0516430071  | 3.1728263128  | 0.7391003017  |
| C | 3.1407988852  | 1.9285855331  | -0.7614930494 |
| H | 3.0233463621  | 2.9321417351  | -1.1935404795 |
| H | 3.872430217   | 2.0012748285  | 0.0484120826  |
| H | 3.5467447253  | 1.2757009331  | -1.5405309527 |
| H | 3.5467447253  | 1.2757009331  | -1.5405309527 |

TS 6-31++G(d,p) 0126

E(UwB97XD) = -1036.74327741 A.U.

First frequency = -1535.8809 cm<sup>-1</sup>

|   |               |               |               |
|---|---------------|---------------|---------------|
| S | 0.1018140329  | -1.0078822016 | 0.5110588924  |
| O | -0.261118593  | -1.54537819   | -0.8081294832 |
| O | -0.6728876028 | -1.4792527209 | 1.6652772429  |
| N | 0.0559032622  | 0.6557313302  | 0.5403305196  |
| C | 0.787892189   | 1.3101325001  | -0.5558118961 |
| H | 0.4132976491  | 0.9771983423  | -1.5321424373 |

|   |               |               |               |
|---|---------------|---------------|---------------|
| H | 0.5811876672  | 2.3828825699  | -0.4736733389 |
| C | 2.290339451   | 1.0710272871  | -0.4361726212 |
| H | 2.2846233915  | -0.1339701626 | 0.0393871547  |
| C | -1.1067064117 | 1.3539644484  | 1.1095709749  |
| H | -0.7070071146 | 2.2343213389  | 1.6253991188  |
| H | -1.5344780894 | 0.7041462202  | 1.8745810719  |
| C | -2.1707450007 | 1.8060520798  | 0.1060621209  |
| H | -1.7162722889 | 2.5048214536  | -0.6078907832 |
| H | -2.9101902059 | 2.3916080146  | 0.6703481263  |
| C | -2.896153338  | 0.7003503452  | -0.6707794695 |
| H | -2.1412096512 | 0.0875306659  | -1.1796775819 |
| C | -3.7082799497 | -0.2136142092 | 0.2513486054  |
| H | -4.4624682601 | 0.3659536783  | 0.7989280848  |
| H | -3.0752508937 | -0.7273764826 | 0.9804190067  |
| H | -4.2311449822 | -0.9806724572 | -0.3293890089 |
| C | -3.796263158  | 1.3224517123  | -1.7420142086 |
| H | -4.5686282616 | 1.951597912   | -1.2820752525 |
| H | -4.301060999  | 0.5480463157  | -2.3288236548 |
| H | -3.2201440069 | 1.9479478707  | -2.4325706749 |
| C | 1.8374131961  | -1.2643309903 | 0.7242166626  |
| H | 2.1035719591  | -1.0441965855 | 1.7580024814  |
| C | 2.4218837463  | -2.508103611  | 0.112672458   |
| H | 2.1774849664  | -2.5768921755 | -0.9495314271 |
| H | 2.0576746316  | -3.4150969585 | 0.6091522062  |
| H | 3.5091129487  | -2.4807636289 | 0.2217946232  |
| C | 2.9463418234  | 1.8861728062  | 0.657926839   |
| H | 2.9982225791  | 2.9429806789  | 0.3630383641  |
| H | 2.375068364   | 1.8221436777  | 1.5894553297  |
| H | 3.9665501999  | 1.5415640023  | 0.8516804078  |
| C | 3.0286426379  | 1.0364860073  | -1.7540409066 |
| H | 2.5854454448  | 0.3080682597  | -2.4403119481 |
| H | 2.9917422338  | 2.0208797202  | -2.2412559433 |
| H | 4.0819375765  | 0.7804175338  | -1.6067695156 |
| H | 4.0819375765  | 0.7804175338  | -1.6067695156 |

TS 6-31++G(d,p) 0127

$E(U_w B97XD) = -1036.73352616$  A.U.

First frequency =  $-1537.8788$   $\text{cm}^{-1}$

|   |               |               |               |
|---|---------------|---------------|---------------|
| S | 0.2990002893  | -1.2890499874 | 0.4061417014  |
| O | 0.1435146421  | -1.6814044704 | -1.0000835858 |
| O | -0.3988671107 | -2.1334673551 | 1.3862634163  |
| N | -0.2171389593 | 0.2736541116  | 0.6301059731  |
| C | 0.6724378919  | 1.4375569837  | 0.4645682004  |
| H | 0.0846325599  | 2.231578556   | -0.0134210429 |
| H | 0.9494259433  | 1.793803823   | 1.4673329168  |
| C | 1.9338505316  | 1.2048892682  | -0.3526344657 |
| H | 2.2485174112  | 0.0268470565  | 0.0872793034  |
| C | -1.3906484451 | 0.5215437817  | 1.4754533119  |
| H | -1.0502783798 | 0.9563237214  | 2.4268421152  |
| H | -1.8455241029 | -0.4398639266 | 1.7117271521  |
| C | -2.4338739297 | 1.4532787011  | 0.8526758477  |
| H | -2.014390741  | 2.4584641669  | 0.7215271539  |
| H | -3.2185424176 | 1.5559877348  | 1.6133121439  |
| C | -3.0883415553 | 1.0027914184  | -0.4671224618 |
| H | -3.9632423548 | 1.6543901831  | -0.5968950246 |
| C | -2.1898307249 | 1.2112206829  | -1.6919078284 |
| H | -1.8218794059 | 2.2424854055  | -1.7416988232 |
| H | -2.7479371872 | 1.0113077615  | -2.6131203915 |
| H | -1.3275504999 | 0.5401749459  | -1.6670889996 |
| C | -3.5984419174 | -0.4398308744 | -0.4005664224 |
| H | -2.7698224243 | -1.1555336825 | -0.3645777697 |
| H | -4.1963654417 | -0.6769081285 | -1.2865067596 |
| H | -4.2252549033 | -0.6022735957 | 0.4835492391  |
| C | 2.0303985955  | -1.1815260209 | 0.7344106701  |
| H | 2.1848040483  | -0.9509586291 | 1.7892843781  |
| C | 2.8936407096  | -2.2554532131 | 0.1296349486  |
| H | 3.9432401433  | -2.0166275971 | 0.318265061   |
| H | 2.7375133683  | -2.322650362  | -0.9491755954 |
| H | 2.6871522974  | -3.2374775379 | 0.570725622   |
| C | 3.0686737478  | 2.1212314969  | 0.053433216   |
| H | 3.9738087044  | 1.8944672581  | -0.5168261174 |
| H | 2.8039910976  | 3.1689274603  | -0.1457189396 |
| H | 3.2977602641  | 2.0316219217  | 1.1198964373  |
| C | 1.7273938367  | 1.0886333154  | -1.8489675352 |
| H | 2.6594271652  | 0.8064030665  | -2.3474194544 |
| H | 0.9642469358  | 0.3490666173  | -2.099323499  |

H 1.4099315455 2.0595309775 -2.2537264664  
H 1.4099315455 2.0595309775 -2.2537264664

TS 6-311++G(d,p) 0001

E(UwB97XD) = -1036.89146866 A.U.

First frequency = -1553.3273 cm<sup>-1</sup>

S 0.2654741818 -1.2260392043 0.2989891804  
O -0.3786087137 -2.2918181781 -0.4643396738  
O -0.1823223325 -1.0125260462 1.6762222004  
N 0.1431688694 0.1616753961 -0.6093963746  
C 0.7236138161 1.3552049447 0.0218822322  
H 0.4877557972 2.2015854891 -0.6303027734  
H 0.2566725287 1.5498805016 0.9940720444  
C 2.2363257816 1.2282816885 0.1608365761  
H 2.333006944 -0.0452008498 0.3989686111  
C -0.9842949364 0.3471746189 -1.5329545695  
H -1.3056758228 -0.6419793236 -1.8581955593  
H -0.5763907195 0.8536841832 -2.4133717327  
C -2.1593431215 1.1612790611 -0.9900223777  
H -2.868662808 1.2880531775 -1.8182008977  
H -1.8102224968 2.1692219032 -0.7377207192  
C -2.8981619979 0.5731879198 0.2163724332  
H -2.1649714437 0.3896148147 1.0099994316  
C -3.9174973568 1.5837245129 0.7446507802  
H -3.4357851 2.5249036507 1.0264734146  
H -4.437114743 1.1938150863 1.6244986055  
H -4.672171947 1.8074780428 -0.0180265024  
C -3.5797176718 -0.7548934297 -0.1179612813  
H -4.1148756953 -1.1430973153 0.7533994774  
H -2.8622221359 -1.5171990828 -0.4297168397  
H -4.3083284479 -0.6186878667 -0.9257581811  
C 2.0191760131 -1.4070242896 0.3576649108  
H 2.3073881925 -1.8114286807 1.3251230034  
C 2.667832533 -1.9914482025 -0.8652525176  
H 2.3074365951 -1.5056020878 -1.7742686385  
H 2.4685946671 -3.0638829439 -0.9476131346  
H 3.7493532852 -1.8505642873 -0.8067932679

|   |              |              |               |
|---|--------------|--------------|---------------|
| C | 2.818299954  | 1.9459319996 | 1.3541967531  |
| H | 2.3319873095 | 1.6349615466 | 2.282520861   |
| H | 3.8908154544 | 1.7559878591 | 1.4419045783  |
| H | 2.6816428383 | 3.0304904189 | 1.2522966653  |
| C | 2.9789002516 | 1.4304333591 | -1.1406291533 |
| H | 2.5011254731 | 0.8829316742 | -1.9567420237 |
| H | 2.9833113717 | 2.4951525665 | -1.4068551415 |
| H | 4.018372162  | 1.101711546  | -1.0630052782 |
| H | 4.018372162  | 1.101711546  | -1.0630052782 |

6311Gdp TS-relax-1-5-0004

E(UwB97XD) = -1036.89116048 A.U.

First frequency = -1548.4409 cm<sup>-1</sup>

|   |               |               |               |
|---|---------------|---------------|---------------|
| S | 0.5599080186  | -1.1891283902 | 0.6886826278  |
| O | -0.16681111   | -2.3383795659 | 0.1556219891  |
| O | 0.3301548169  | -0.8379560866 | 2.0916094114  |
| N | 0.2348570113  | 0.0966943228  | -0.3293348197 |
| C | 0.8649946822  | 1.3562056938  | 0.1028329007  |
| H | 0.4639269833  | 2.1431169449  | -0.5442688623 |
| H | 0.5893536027  | 1.6040280657  | 1.1339113562  |
| C | 2.3789788892  | 1.2814010511  | -0.0446129397 |
| H | 2.5675768697  | 0.0422144945  | 0.2946245498  |
| C | -1.1315949995 | 0.1879861345  | -0.8603371114 |
| H | -1.3912349131 | -0.7952330456 | -1.2517825021 |
| H | -1.073616262  | 0.8706978396  | -1.7141135755 |
| C | -2.1808547629 | 0.6775145903  | 0.1363387092  |
| H | -1.8327547449 | 1.6108833077  | 0.5927365967  |
| H | -2.2782580153 | -0.0523055634 | 0.949532143   |
| C | -3.557065369  | 0.9197500283  | -0.4940245179 |
| H | -3.4276483918 | 1.636089096   | -1.3165854648 |
| C | -4.1631660591 | -0.3626375132 | -1.069401167  |
| H | -5.1649332319 | -0.1726216493 | -1.4648798945 |
| H | -4.2487806558 | -1.128268535  | -0.2902991761 |
| H | -3.5621615333 | -0.7773156665 | -1.8825480346 |
| C | -4.5024919458 | 1.5455068672  | 0.5322217514  |
| H | -4.6617772703 | 0.8626332131  | 1.3740114538  |
| H | -5.4780400016 | 1.7622364652  | 0.0877974196  |

|   |               |               |               |
|---|---------------|---------------|---------------|
| H | -4.0958310142 | 2.4797618152  | 0.9301815284  |
| C | 2.3036474723  | -1.3232766404 | 0.4612727996  |
| H | 2.7664709589  | -1.6040313749 | 1.4044930006  |
| C | 2.7610076309  | -2.0336143895 | -0.7814562767 |
| H | 3.8341177717  | -1.8798106513 | -0.913830577  |
| H | 2.2475137012  | -1.6522343825 | -1.6662610735 |
| H | 2.577435599   | -3.1100192138 | -0.7155946337 |
| C | 3.1460091741  | 2.127949868   | 0.941958273   |
| H | 2.8587165609  | 1.9001831491  | 1.9717926954  |
| H | 4.2226487062  | 1.97291939    | 0.8379994726  |
| H | 2.9466420198  | 3.1932610872  | 0.7671627416  |
| C | 2.8556737027  | 1.3670113642  | -1.476679201  |
| H | 2.7642508064  | 2.3987956996  | -1.839515531  |
| H | 3.9049755064  | 1.0744384908  | -1.5656495209 |
| H | 2.2584009917  | 0.7269451553  | -2.1301721914 |
| H | 2.2584009917  | 0.7269451553  | -2.1301721914 |

TS 6-311++G(d,p) 0007

E(UwB97XD) = -1036.89104673 A.U.

First frequency = -1547.4913  $\text{cm}^{-1}$

|   |               |               |               |
|---|---------------|---------------|---------------|
| S | 0.5991415499  | -1.2682281779 | 0.6719240436  |
| O | -0.0871951503 | -2.4539439993 | 0.165685866   |
| O | 0.3814128658  | -0.9116929173 | 2.0754257148  |
| N | 0.1997319518  | -0.0099093007 | -0.3545570377 |
| C | 0.7781997397  | 1.2822880769  | 0.0537456691  |
| H | 0.3374747992  | 2.0408207502  | -0.6014442818 |
| H | 0.4988036457  | 1.5326147562  | 1.0832496298  |
| C | 2.2927529566  | 1.273615473   | -0.1065551332 |
| H | 2.5410922989  | 0.0466011615  | 0.2366275426  |
| C | -1.1796893209 | 0.0205454288  | -0.8588771295 |
| H | -1.4188282954 | -0.9771710094 | -1.2311968481 |
| H | -1.1554266398 | 0.6895854311  | -1.7224391077 |
| C | -2.2290448741 | 0.471492015   | 0.1561208368  |
| H | -1.9930617064 | 1.4834204816  | 0.5096459684  |
| H | -2.1766280904 | -0.1863629827 | 1.0302188036  |
| C | -3.6599260609 | 0.4558295763  | -0.394257161  |
| H | -3.8641961416 | -0.5568955606 | -0.7661726788 |



|   |               |               |               |
|---|---------------|---------------|---------------|
| C | -4.6559547748 | 0.7567204308  | 0.7264675617  |
| H | -4.5553369652 | 0.0433399782  | 1.5493263428  |
| H | -5.6856458649 | 0.7102150552  | 0.3607488132  |
| H | -4.4886066426 | 1.7616650333  | 1.1299302386  |
| C | -3.846912746  | 1.4371525892  | -1.5539667573 |
| H | -3.2253998634 | 1.1847742385  | -2.4168177555 |
| H | -3.5910425709 | 2.4553172191  | -1.2391400897 |
| H | -4.8873947255 | 1.4429695912  | -1.8906037826 |
| C | 2.3422824231  | -1.328645366  | 0.4131528617  |
| H | 2.83328856    | -1.5835302309 | 1.3494749695  |
| C | 2.8091793945  | -2.0237440691 | -0.8345868541 |
| H | 2.6773230638  | -3.1071690072 | -0.7602955894 |
| H | 3.8714454431  | -1.8210599163 | -0.9874414413 |
| H | 2.2623194668  | -1.6710786999 | -1.711306652  |
| C | 3.0305980572  | 2.1584045028  | 0.8686861278  |
| H | 2.7630635054  | 1.9231258009  | 1.9021484402  |
| H | 4.1120254087  | 2.0503969147  | 0.7553756523  |
| H | 2.7828522675  | 3.2130131484  | 0.6910419162  |
| C | 2.752163787   | 1.3719368416  | -1.5435078792 |
| H | 2.1799259666  | 0.7000156691  | -2.1874212246 |
| H | 2.6090704346  | 2.3957556021  | -1.9121097141 |
| H | 3.8131939893  | 1.1282416143  | -1.6403664363 |
| H | 3.8131939893  | 1.1282416143  | -1.6403664363 |

TS 6-311++G(d,p) 0016

E(UwB97XD) = -1036.89005142 A.U.

First frequency = -1539.0027 cm<sup>-1</sup>

|   |               |               |               |
|---|---------------|---------------|---------------|
| S | 0.6029842039  | -1.3330646875 | 0.327138328   |
| O | 0.438295051   | -1.8642996296 | -1.0277572713 |
| O | -0.0938876159 | -2.0344470339 | 1.4031295045  |
| N | 0.1491874162  | 0.2711959557  | 0.4274475919  |
| C | 0.7477420143  | 1.1202179754  | -0.617815925  |
| H | 0.5372634972  | 0.7236779     | -1.6174940593 |
| H | 0.259011316   | 2.0969287999  | -0.5420912675 |
| C | 2.2474948202  | 1.2680448443  | -0.4004693155 |
| H | 2.5171236366  | 0.0783849415  | 0.0321592623  |
| C | -1.2548550408 | 0.541480914   | 0.7664577226  |

|   |               |               |               |
|---|---------------|---------------|---------------|
| H | -1.274664263  | 1.5814994593  | 1.101077733   |
| H | -1.5138797245 | -0.078233451  | 1.6267172448  |
| C | -2.2491984999 | 0.3108570827  | -0.3704978405 |
| H | -2.1548449909 | -0.7246902613 | -0.7141672201 |
| H | -1.9913158119 | 0.950241304   | -1.2245583152 |
| C | -3.706513951  | 0.5732714466  | 0.0270519329  |
| H | -3.9331042948 | -0.052519511  | 0.9003735095  |
| C | -3.9499727309 | 2.0349810312  | 0.4105954755  |
| H | -3.6769443803 | 2.6987394819  | -0.4177213894 |
| H | -3.3731407513 | 2.3367713923  | 1.2884512786  |
| H | -5.0060700487 | 2.2031327498  | 0.6393860886  |
| C | -4.642369723  | 0.1557540327  | -1.1080864238 |
| H | -4.5025064541 | -0.8965198848 | -1.3713028869 |
| H | -4.450243681  | 0.75537876    | -2.0048951256 |
| H | -5.6896883459 | 0.2993485388  | -0.8276306085 |
| C | 2.3330221852  | -1.1700495137 | 0.6360006632  |
| H | 2.4860313977  | -0.9568676185 | 1.6920414223  |
| C | 3.2297780237  | -2.1910616089 | -0.0044920476 |
| H | 3.0455756103  | -2.2567085737 | -1.0777866201 |
| H | 3.0877186015  | -3.1861940816 | 0.4300940488  |
| H | 4.2707162278  | -1.9028512015 | 0.1555975301  |
| C | 2.6091249475  | 2.1686152127  | 0.7585726437  |
| H | 3.6706282565  | 2.0886682057  | 1.0062677979  |
| H | 2.4023829237  | 3.2152964389  | 0.5020733593  |
| H | 2.0245934144  | 1.9163001521  | 1.6469855534  |
| C | 3.04594073    | 1.4805333795  | -1.6633804541 |
| H | 2.7898215522  | 2.4448339681  | -2.1216398139 |
| H | 4.1180974831  | 1.4909093887  | -1.4526025678 |
| H | 2.8433185773  | 0.698522051   | -2.4000254608 |
| H | 2.8433185773  | 0.698522051   | -2.4000254608 |

TS 6-311++G(d,p) 0017

E(UwB97XD) = -1036.89046547 A.U.

First frequency = -1544.8507  $\text{cm}^{-1}$

|   |               |               |              |
|---|---------------|---------------|--------------|
| S | 0.2867532672  | -1.0092824073 | 0.6737206939 |
| O | -0.0853921824 | -1.7629581443 | -0.524833283 |
| O | -0.396439527  | -1.3562313255 | 1.9183319376 |

|   |               |               |               |
|---|---------------|---------------|---------------|
| N | 0.1038678848  | 0.6273653749  | 0.4586109383  |
| C | 0.7358772627  | 1.1640678915  | -0.7550616456 |
| H | 0.35758935    | 0.6574202239  | -1.650261369  |
| H | 0.4398060181  | 2.2151197917  | -0.8249028953 |
| C | 2.2543346035  | 1.0664737509  | -0.6745316103 |
| H | 2.3662451196  | -0.0558400976 | -0.0379867886 |
| C | -1.0825488765 | 1.3166664734  | 0.9843850468  |
| H | -0.7338397234 | 2.2892945832  | 1.3454355391  |
| H | -1.4243752693 | 0.7600010227  | 1.8565810019  |
| C | -2.2196596116 | 1.5345876367  | -0.0143800531 |
| H | -1.8549385505 | 2.1515341419  | -0.8437890866 |
| H | -2.9804855181 | 2.1386696366  | 0.4968935796  |
| C | -2.8804325842 | 0.274860829   | -0.5829943561 |
| H | -2.0997350308 | -0.3450066561 | -1.0382775559 |
| C | -3.5711090439 | -0.5521196912 | 0.5028584616  |
| H | -2.8672908494 | -0.9017946153 | 1.2615177361  |
| H | -4.0516931992 | -1.433353311  | 0.0683347218  |
| H | -4.3465106748 | 0.041300407   | 1.0014541305  |
| C | -3.8733650372 | 0.6596337227  | -1.680848145  |
| H | -3.3826531121 | 1.2185769152  | -2.4833918594 |
| H | -4.675057681  | 1.2874552713  | -1.2753789277 |
| H | -4.3350379433 | -0.228558135  | -2.1214472699 |
| C | 2.0429332586  | -1.1014469924 | 0.8291328067  |
| H | 2.3309789699  | -0.70598339   | 1.8013259603  |
| C | 2.6977094669  | -2.3760542292 | 0.3780704772  |
| H | 2.4101996217  | -2.6254537925 | -0.6442848559 |
| H | 2.4331202791  | -3.2193796086 | 1.0247462343  |
| H | 3.782128981   | -2.2538780186 | 0.4170813778  |
| C | 2.8738918901  | 2.0754981782  | 0.2654411593  |
| H | 2.8194643761  | 3.0810841291  | -0.1702473766 |
| H | 2.3459783353  | 2.0931237412  | 1.2227174304  |
| H | 3.9263660603  | 1.8487535553  | 0.4536812681  |
| C | 2.9450217611  | 0.9065927276  | -2.0065104068 |
| H | 2.5411360354  | 0.0585252939  | -2.5659030074 |
| H | 2.8083995001  | 1.8065657871  | -2.620460179  |
| H | 4.019666937   | 0.7575592526  | -1.8759390951 |
| H | 4.019666937   | 0.7575592526  | -1.8759390951 |

TS 6-311++G(d,p) 0018

E(UwB97XD) = -1036.89209774 A.U.

First frequency = -1547.4463 cm<sup>-1</sup>

|   |               |               |               |
|---|---------------|---------------|---------------|
| S | 0.4406563481  | -1.5003299635 | -0.3037673829 |
| O | 1.236191807   | -2.0767066596 | -1.390094177  |
| O | -0.7051649323 | -2.2792747679 | 0.1611315906  |
| N | -0.1244856032 | 0.0161888274  | -0.6905579143 |
| C | 0.9160031278  | 0.9352237817  | -1.1792812588 |
| H | 1.4591475198  | 0.4906174372  | -2.0218312426 |
| H | 0.4021248467  | 1.8249494748  | -1.5546209292 |
| C | 1.8694927908  | 1.3217629149  | -0.0584073749 |
| H | 1.9262117453  | 0.1863835492  | 0.5615503879  |
| C | -1.4444296531 | 0.1217462248  | -1.3283944169 |
| H | -1.961222344  | -0.830244778  | -1.2101882294 |
| H | -1.3207849257 | 0.2941668471  | -2.4033149327 |
| C | -2.255721366  | 1.2472828685  | -0.6925919454 |
| H | -3.1786593912 | 1.373561095   | -1.2720220704 |
| H | -1.7007429159 | 2.187908882   | -0.7923251326 |
| C | -2.603499311  | 1.0214373572  | 0.7830548056  |
| H | -1.6748826426 | 0.7574348634  | 1.3034084215  |
| C | -3.1459761786 | 2.3094410447  | 1.4022806495  |
| H | -3.3819472476 | 2.1688330311  | 2.4609737231  |
| H | -4.0637510402 | 2.6270143017  | 0.8944548649  |
| H | -2.4196696924 | 3.1241769424  | 1.3227491806  |
| C | -3.5910438134 | -0.131527287  | 0.9692990929  |
| H | -4.528255451  | 0.0742419023  | 0.4395622442  |
| H | -3.8284280073 | -0.2690779044 | 2.028161391   |
| H | -3.1866804349 | -1.076120483  | 0.5980241047  |
| C | 1.5377501912  | -1.0788621881 | 1.0144507158  |
| H | 0.9476596713  | -0.8470868407 | 1.8991054206  |
| C | 2.7428929092  | -1.9572760743 | 1.1954041958  |
| H | 3.3029189645  | -2.051921694  | 0.2639126194  |
| H | 2.4665217684  | -2.9615129283 | 1.5335852427  |
| H | 3.3948167357  | -1.5179879605 | 1.9532549713  |
| C | 1.2647693288  | 2.2706322679  | 0.9511419878  |
| H | 0.2767693434  | 1.9279198515  | 1.2686422688  |
| H | 1.9002083594  | 2.3683785572  | 1.8349243242  |

|   |              |              |               |
|---|--------------|--------------|---------------|
| H | 1.1497749632 | 3.268132614  | 0.5082779421  |
| C | 3.268274509  | 1.6597942687 | -0.5127407853 |
| H | 3.9250909405 | 1.8420126958 | 0.3412836115  |
| H | 3.6970003216 | 0.8554048047 | -1.116417649  |
| H | 3.2626949258 | 2.5704861043 | -1.1259433333 |
| H | 3.2626949258 | 2.5704861043 | -1.1259433333 |

TS 6-311++G(d,p) 0019

E(UwB97XD) = -1036.89019197 A.U.

First frequency = -1541.8080  $\text{cm}^{-1}$

|   |               |               |               |
|---|---------------|---------------|---------------|
| S | 0.5423842586  | -1.3147848281 | 0.0345067985  |
| O | 0.3613608929  | -1.5953104612 | -1.3914516259 |
| O | -0.2109162819 | -2.1426318876 | 0.973832705   |
| N | 0.1889640793  | 0.2750140877  | 0.4044845412  |
| C | 0.8570673663  | 1.248118761   | -0.4774980828 |
| H | 0.6444074081  | 1.0387607126  | -1.5318271786 |
| H | 0.4271014702  | 2.2273048707  | -0.2431575536 |
| C | 2.3584996242  | 1.2623611254  | -0.2248037496 |
| H | 2.5468965491  | 0.0009856321  | -0.0045576374 |
| C | -1.2002458794 | 0.5685829895  | 0.7824069225  |
| H | -1.1731744121 | 1.5438684043  | 1.2787674449  |
| H | -1.4925304415 | -0.1656352027 | 1.5326654188  |
| C | -2.1944420976 | 0.5948610196  | -0.377395728  |
| H | -2.2662697027 | -0.4070682189 | -0.8181756054 |
| H | -1.8112741141 | 1.2562759216  | -1.162536291  |
| C | -3.5941431563 | 1.0702200781  | 0.0287807537  |
| H | -3.4917292539 | 2.0645590886  | 0.4840488812  |
| C | -4.4821938455 | 1.2070452749  | -1.2086231877 |
| H | -4.6129365894 | 0.2350030614  | -1.6967991958 |
| H | -4.0437941445 | 1.8932276252  | -1.9390491032 |
| H | -5.4737122148 | 1.5837377318  | -0.9418614959 |
| C | -4.2448030492 | 0.1401969968  | 1.0557474601  |
| H | -3.6874804781 | 0.1043872761  | 1.9951719786  |
| H | -4.3065975382 | -0.8805137225 | 0.6622162587  |
| H | -5.2604651439 | 0.4722491438  | 1.2885842857  |
| C | 2.2750617067  | -1.3185682435 | 0.3715229693  |
| H | 2.4256779242  | -1.3014475181 | 1.4490725097  |

|   |              |               |               |
|---|--------------|---------------|---------------|
| C | 3.1158299813 | -2.2692932239 | -0.4322956197 |
| H | 2.9474114913 | -2.1347565384 | -1.5017081963 |
| H | 2.9028170726 | -3.3132943606 | -0.1794887961 |
| H | 4.1700106608 | -2.0828287542 | -0.2174816317 |
| C | 2.7516678768 | 1.9237165029  | 1.076413637   |
| H | 3.8014925348 | 1.7353958628  | 1.3150908455  |
| H | 2.613693057  | 3.0099462182  | 1.0046374275  |
| H | 2.1359945546 | 1.5583691019  | 1.9022838956  |
| C | 3.1919038176 | 1.6403911636  | -1.424832614  |
| H | 4.2585954439 | 1.5480733232  | -1.206521222  |
| H | 2.9573179184 | 1.0114927511  | -2.2878076873 |
| H | 3.0018488502 | 2.6832945138  | -1.7106443113 |
| H | 3.0018488502 | 2.6832945138  | -1.7106443113 |

TS 6-311++G(d,p) 0029

E(UwB97XD) = -1036.89086794 A.U.

First frequency = -1541.1530 cm<sup>-1</sup>

|   |               |               |               |
|---|---------------|---------------|---------------|
| S | 0.7756639632  | -1.4943793505 | 0.6488631915  |
| O | -0.0801037364 | -2.5329915481 | 0.08117866    |
| O | 1.1221196534  | -1.6112463627 | 2.0668953526  |
| N | 0.0448627413  | -0.0270520915 | 0.3137780748  |
| C | 0.7877221118  | 1.124719474   | 0.854616372   |
| H | 0.1507705382  | 2.0040400691  | 0.7214246924  |
| H | 0.9570720657  | 1.0025729367  | 1.9312816536  |
| C | 2.1011552211  | 1.3235084337  | 0.1134477879  |
| H | 2.433439644   | 0.0825626773  | -0.0639802884 |
| C | -1.4164258111 | 0.0346397525  | 0.4589367493  |
| H | -1.6785665312 | 0.4499197905  | 1.4410267088  |
| H | -1.8029586437 | -0.9831814026 | 0.4180896023  |
| C | -2.027837767  | 0.8693382457  | -0.6612933549 |
| H | -1.8466179148 | 0.3592603695  | -1.6151932073 |
| H | -1.5108822194 | 1.8339403323  | -0.7192304964 |
| C | -3.5289208131 | 1.1268995925  | -0.4902647789 |
| H | -3.6744443651 | 1.6332904628  | 0.4732249296  |
| C | -4.0300355507 | 2.0593697442  | -1.5937962823 |
| H | -5.091137155  | 2.289286733   | -1.4627090504 |
| H | -3.9074561509 | 1.5920784921  | -2.5771842885 |

|   |               |               |               |
|---|---------------|---------------|---------------|
| H | -3.4769476812 | 3.0031930982  | -1.5989444505 |
| C | -4.339322868  | -0.1712111308 | -0.4732200645 |
| H | -4.1687434945 | -0.7415841822 | -1.3932112415 |
| H | -5.409678319  | 0.0421632638  | -0.4044681913 |
| H | -4.0769714947 | -0.81176119   | 0.3726759466  |
| C | 2.2784863203  | -1.2970596503 | -0.2531537296 |
| H | 3.0891712347  | -1.768861729  | 0.2972268612  |
| C | 2.2000190337  | -1.544199266  | -1.7334452323 |
| H | 2.0691842932  | -2.6076755321 | -1.9534259871 |
| H | 3.1259118395  | -1.2104242785 | -2.2067502854 |
| H | 1.3680764211  | -0.9968602536 | -2.1811563055 |
| C | 3.1955625107  | 1.9579591138  | 0.936806499   |
| H | 2.9220784631  | 2.9858143535  | 1.2084935842  |
| H | 3.3706403104  | 1.4042304098  | 1.8629472559  |
| H | 4.1320784702  | 2.003532833   | 0.3757608012  |
| C | 1.9294362836  | 1.8866660889  | -1.2789885942 |
| H | 1.122590489   | 1.3789087888  | -1.812656435  |
| H | 1.6757941242  | 2.9529845713  | -1.220862859  |
| H | 2.8484347605  | 1.7941467463  | -1.8632409452 |
| H | 2.8484347605  | 1.7941467463  | -1.8632409452 |

TS 6-311++G(d,p) 0031

E(UwB97XD) = -1036.89062569 A.U.

First frequency = -1535.3864 cm<sup>-1</sup>

|   |               |               |               |
|---|---------------|---------------|---------------|
| S | 0.8018290132  | -1.4486099318 | 0.8558360263  |
| O | 0.0106580994  | -2.5950521377 | 0.4163578835  |
| O | 1.0932622999  | -1.3443859407 | 2.2873000976  |
| N | 0.0289141182  | -0.0791279873 | 0.2844188085  |
| C | 0.7080061477  | 1.170295814   | 0.6709947442  |
| H | 0.0411908135  | 1.9919447853  | 0.3940650151  |
| H | 0.8474133617  | 1.2129675747  | 1.7580589331  |
| C | 2.0358092439  | 1.316329163   | -0.0561030825 |
| H | 2.4251692716  | 0.0796361785  | -0.0305550729 |
| C | -1.4380935    | -0.0559510815 | 0.3887436972  |
| H | -1.7312538079 | 0.4783173204  | 1.2993830742  |
| H | -1.7942279084 | -1.0830746104 | 0.4795712497  |
| C | -2.0486860672 | 0.5765737082  | -0.8573497617 |

|   |               |               |               |
|---|---------------|---------------|---------------|
| H | -1.7113797707 | -0.0024312282 | -1.7234261235 |
| H | -1.6631897712 | 1.5957207915  | -0.9910179165 |
| C | -3.5809445707 | 0.6270445457  | -0.8412833311 |
| H | -3.9492442481 | -0.3909819701 | -0.6585191332 |
| C | -4.1204412863 | 1.5367452033  | 0.2653166321  |
| H | -3.8482138517 | 1.184363945   | 1.2631975403  |
| H | -5.211885198  | 1.5907663258  | 0.2226749805  |
| H | -3.7300080863 | 2.5541182568  | 0.1481794069  |
| C | -4.1026356881 | 1.0799557695  | -2.2056837583 |
| H | -5.1960367588 | 1.089826867   | -2.2250420866 |
| H | -3.7551457855 | 0.4180660256  | -3.0040634045 |
| H | -3.7545738576 | 2.0938247748  | -2.4331410599 |
| C | 2.3321919839  | -1.3182728797 | -0.0118369461 |
| H | 3.1373316734  | -1.6632240653 | 0.6327509921  |
| C | 2.3278821443  | -1.7883691431 | -1.4392475749 |
| H | 1.4920079229  | -1.3578028912 | -1.9942468218 |
| H | 2.2552594324  | -2.8780796669 | -1.4999272044 |
| H | 3.2570702678  | -1.4820972171 | -1.924627461  |
| C | 3.072885655   | 2.1202673661  | 0.6897541075  |
| H | 2.7464428485  | 3.1634298154  | 0.7917173554  |
| H | 3.2387126471  | 1.7236175332  | 1.6948220373  |
| H | 4.0257219323  | 2.1238667626  | 0.1549767678  |
| C | 1.8877849985  | 1.6519074266  | -1.5227747712 |
| H | 1.5861277043  | 2.7011053127  | -1.6362660583 |
| H | 2.8294349663  | 1.515857744   | -2.0605975371 |
| H | 1.1225561022  | 1.0304016454  | -1.9936557376 |
| H | 1.1225561022  | 1.0304016454  | -1.9936557376 |

TS 6-311++G(d,p) 0039

E(UwB97XD) = -1036.88982950 A.U.

First frequency = -1529.4042 cm<sup>-1</sup>

|   |               |               |               |
|---|---------------|---------------|---------------|
| S | 0.6750080661  | -1.5452588776 | 0.2072668162  |
| O | 1.0273929578  | -2.2885423897 | -1.004485046  |
| O | -0.2158564766 | -2.2121401238 | 1.1544816439  |
| N | -0.0184855325 | -0.0669636378 | -0.1536618288 |
| C | 0.7773406488  | 0.733046955   | -1.1020048681 |
| H | 0.9964792821  | 0.1527124214  | -2.0067175021 |



|   |               |               |               |
|---|---------------|---------------|---------------|
| H | 0.1549773748  | 1.5810643802  | -1.4019488726 |
| C | 2.0565898542  | 1.2339251893  | -0.4504716295 |
| H | 2.3484415673  | 0.1900979698  | 0.2535751037  |
| C | -1.4698437956 | -0.0684089005 | -0.3922035401 |
| H | -1.8870794061 | -0.9634775004 | 0.0682785881  |
| H | -1.6721186701 | -0.1246743909 | -1.4699652369 |
| C | -2.110525507  | 1.1759387327  | 0.2134713077  |
| H | -1.5632105741 | 2.0652122471  | -0.1191717095 |
| H | -2.0000002465 | 1.1304800091  | 1.3036191235  |
| C | -3.5897510756 | 1.34694159    | -0.1489401769 |
| H | -3.6639539215 | 1.3877640795  | -1.243811491  |
| C | -4.4443306043 | 0.1765107458  | 0.3429449215  |
| H | -4.345273597  | 0.059057738   | 1.4279401812  |
| H | -4.1592494427 | -0.7693230799 | -0.1248574564 |
| H | -5.5008807635 | 0.3486353956  | 0.1193559884  |
| C | -4.1165572114 | 2.6694686809  | 0.4094496834  |
| H | -5.159778727  | 2.8295934798  | 0.1230787612  |
| H | -3.5305985946 | 3.5176323388  | 0.0433910813  |
| H | -4.0653057641 | 2.6723435866  | 1.5038844419  |
| C | 2.1678919653  | -0.9960832797 | 0.9736530268  |
| H | 1.9371406913  | -0.6384613233 | 1.9751346725  |
| C | 3.3691371266  | -1.8841324919 | 0.8134981679  |
| H | 3.2475177952  | -2.8327787777 | 1.3468151774  |
| H | 4.2436907108  | -1.3785732395 | 1.2278884007  |
| H | 3.5580402884  | -2.1046206413 | -0.2381173046 |
| C | 1.8299283959  | 2.3245207029  | 0.5714292143  |
| H | 1.0231784487  | 2.0555422396  | 1.2579526957  |
| H | 2.7347633164  | 2.5168956376  | 1.1533455366  |
| H | 1.5492981     | 3.2588773834  | 0.068874139   |
| C | 3.1989171122  | 1.4656451912  | -1.4089804826 |
| H | 4.1110782612  | 1.7390911004  | -0.8731110425 |
| H | 3.4019243467  | 0.5756563086  | -2.0106673998 |
| H | 2.9609872264  | 2.2868638886  | -2.0977430212 |
| H | 2.9609872264  | 2.2868638886  | -2.0977430212 |

TS 6-311++G(d,p) 0040

E(UwB97XD) = -1036.89059490 A.U.

First frequency = -1521.0686  $\text{cm}^{-1}$

|   |               |               |               |
|---|---------------|---------------|---------------|
| S | 0.4423400544  | -1.1820460572 | 0.9544107502  |
| O | -0.6128342682 | -2.1347847104 | 0.6176770559  |
| O | 0.9308780624  | -1.1855620138 | 2.3354072071  |
| N | -0.1148271141 | 0.3344695987  | 0.5030881937  |
| C | 0.8524186887  | 1.4081849288  | 0.7988946947  |
| H | 0.3407003564  | 2.3545850535  | 0.6004552679  |
| H | 1.1215900191  | 1.3987624863  | 1.8626462257  |
| C | 2.0895823627  | 1.3031929987  | -0.0786866804 |
| H | 2.2153605039  | 0.015980928   | -0.1222697285 |
| C | -1.4974317091 | 0.645361084   | 0.9149264354  |
| H | -1.4740039633 | 1.1694455703  | 1.8776395301  |
| H | -2.0260412633 | -0.2945150817 | 1.075166343   |
| C | -2.2288160624 | 1.4920524333  | -0.1300086189 |
| H | -1.5291836668 | 2.2197972416  | -0.5561684163 |
| H | -2.9925398412 | 2.0764898877  | 0.3944826886  |
| C | -2.9157379139 | 0.7245672311  | -1.2721330356 |
| H | -3.345743475  | 1.492235062   | -1.9274480371 |
| C | -1.9467906934 | -0.1094593646 | -2.1112059627 |
| H | -2.4636323252 | -0.5405197786 | -2.9739056466 |
| H | -1.5281181002 | -0.9309021192 | -1.524384724  |
| H | -1.1176935583 | 0.4993077589  | -2.483085225  |
| C | -4.072817057  | -0.140574769  | -0.766254629  |
| H | -4.6196004464 | -0.5798271499 | -1.605435196  |
| H | -4.7798886577 | 0.4465231289  | -0.1725241112 |
| H | -3.7140019884 | -0.9679408033 | -0.1456576627 |
| C | 1.8418726199  | -1.3328175493 | -0.1077874702 |
| H | 2.6328697916  | -1.8545446689 | 0.4259591623  |
| C | 1.5662273187  | -1.7436046    | -1.5264070501 |
| H | 1.2341438703  | -2.784400055  | -1.5829852371 |
| H | 2.4809421788  | -1.6459818386 | -2.1149036699 |
| H | 0.7971510472  | -1.1148983989 | -1.9780679585 |
| C | 3.3494368408  | 1.8440898478  | 0.5531542011  |
| H | 4.2152932707  | 1.6748122087  | -0.0914550181 |
| H | 3.2619111299  | 2.9266283475  | 0.7128422323  |
| H | 3.5408668122  | 1.3787503072  | 1.5236186501  |
| C | 1.8536402655  | 1.7229825911  | -1.5114269264 |
| H | 2.6826977617  | 1.4234507801  | -2.1574029042 |
| H | 0.9313237496  | 1.2871951398  | -1.9011365024 |

H 1.7605377531 2.8149601566 -1.5696966671  
H 1.7605377531 2.8149601566 -1.5696966671

TS 6-311++G(d,p) 0041

E(UwB97XD) = -1036.88955427 A.U.

First frequency = -1526.1596 cm<sup>-1</sup>

S 0.7237038842 -1.5886741772 0.2088969318  
O 1.0386432565 -2.2924318446 -1.0364827105  
O -0.0955239776 -2.3068295161 1.1829928247  
N -0.0354942701 -0.127111178 -0.0814432808  
C 0.6869921043 0.7220418316 -1.0461514903  
H 0.8820732169 0.1712255854 -1.9746321987  
H 0.0225743526 1.5545836415 -1.2943199555  
C 1.9783291184 1.2519563667 -0.4435812329  
H 2.3392702631 0.2025287065 0.2184562119  
C -1.4951694528 -0.178122073 -0.2642824562  
H -1.8697151639 -1.0924903794 0.1983066481  
H -1.7276860606 -0.2285676993 -1.3339450216  
C -2.1562016965 1.024667119 0.4005271156  
H -1.7583113086 1.9563414436 -0.0221357808  
H -1.8758182714 1.015517237 1.458841109  
C -3.6843145609 1.0405520021 0.2768397266  
H -4.0627813168 0.0829049644 0.65773964  
C -4.2662512476 2.1570025543 1.1450736233  
H -3.9095648093 3.1352026501 0.8034370881  
H -3.9740071281 2.0395552592 2.1924721013  
H -5.3587609472 2.1640233315 1.0964224223  
C -4.1481306689 1.1953656115 -1.1736369114  
H -5.2391397687 1.24904773 -1.2264113662  
H -3.8298096225 0.3609537646 -1.8032707873  
H -3.7460869075 2.118201747 -1.6071584447  
C 2.2344702275 -1.0070141352 0.9139881872  
H 2.0434083265 -0.6831998835 1.9351120111  
C 3.4550478015 -1.8481989156 0.6693093946  
H 4.3318128218 -1.32447327 1.0554721819  
H 3.5987963392 -2.032527392 -0.3963457925  
H 3.391585074 -2.8151121007 1.1794201847

|   |              |              |               |
|---|--------------|--------------|---------------|
| C | 1.7648543115 | 2.3088203406 | 0.6159588911  |
| H | 2.6898979149 | 2.5184743525 | 1.1588765997  |
| H | 1.428692262  | 3.2447383425 | 0.1518855912  |
| H | 1.0018796865 | 1.9949274016 | 1.3327808823  |
| C | 3.0637623105 | 1.5466270196 | -1.4498379122 |
| H | 3.2684534974 | 0.6782994024 | -2.0818672167 |
| H | 2.7636073105 | 2.3736771223 | -2.1065511474 |
| H | 3.9907164431 | 1.84116389   | -0.9519488273 |
| H | 3.9907164431 | 1.84116389   | -0.9519488273 |

TS 6-311++G(d,p) 0045

E(UwB97XD) = -1036.88920952 A.U.

First frequency = -1503.7042 cm<sup>-1</sup>

|   |               |               |               |
|---|---------------|---------------|---------------|
| S | 0.2190890898  | -1.3783203196 | -0.3711629106 |
| O | 0.854939836   | -1.9324907358 | -1.5690367637 |
| O | -0.978094491  | -2.061474141  | 0.1152765144  |
| N | -0.190679787  | 0.2325789313  | -0.5739454029 |
| C | 0.9252245741  | 1.0617571555  | -1.0683545196 |
| H | 1.3021898634  | 0.6640012017  | -2.0192934769 |
| H | 0.5076082632  | 2.0526202409  | -1.2705806575 |
| C | 2.0448241564  | 1.177838798   | -0.0451739652 |
| H | 1.9852983043  | 0.0022723706  | 0.4797259155  |
| C | -1.4649479562 | 0.4666273447  | -1.2813895352 |
| H | -2.05876425   | -0.4463598136 | -1.2392847241 |
| H | -1.2525008026 | 0.6611040965  | -2.3394564255 |
| C | -2.2618744117 | 1.6300398262  | -0.6940648293 |
| H | -3.0129866996 | 1.8976477718  | -1.4461997257 |
| H | -1.6111026779 | 2.5063262396  | -0.5906931173 |
| C | -2.9917590241 | 1.3793781733  | 0.6382857463  |
| H | -3.6362834174 | 2.2553856798  | 0.7840734122  |
| C | -3.8992091147 | 0.1482373593  | 0.5806152991  |
| H | -4.5468651196 | 0.1694899675  | -0.3017239426 |
| H | -4.5392999091 | 0.103519249   | 1.4662973184  |
| H | -3.3115105651 | -0.7741215574 | 0.5514821515  |
| C | -2.0556946091 | 1.3070302425  | 1.8462169706  |
| H | -1.4414832199 | 2.2091560667  | 1.9212865261  |
| H | -1.3869284021 | 0.4463229954  | 1.7764448197  |

|   |              |               |               |
|---|--------------|---------------|---------------|
| H | -2.633599726 | 1.2165310538  | 2.7710444126  |
| C | 1.4462819821 | -1.2229000085 | 0.8852763312  |
| H | 0.9591325094 | -0.9788735597 | 1.8273624129  |
| C | 2.5165292962 | -2.2768505871 | 0.9084774585  |
| H | 2.9946474834 | -2.3720996355 | -0.0675246872 |
| H | 2.1162710221 | -3.2557801723 | 1.1925578068  |
| H | 3.2740635673 | -1.9999988126 | 1.6443551009  |
| C | 1.7290034079 | 2.1054185006  | 1.10554803    |
| H | 0.7530337232 | 1.8727500463  | 1.5361172379  |
| H | 2.4843922541 | 2.0314070231  | 1.8919097647  |
| H | 1.7065350932 | 3.1458287909  | 0.757456643   |
| C | 3.4213094441 | 1.3325431887  | -0.6455891027 |
| H | 4.1901686089 | 1.3280557958  | 0.1307644874  |
| H | 3.6391049044 | 0.5311097093  | -1.3565387125 |
| H | 3.4997999075 | 2.2862686049  | -1.1837499768 |
| H | 3.4997999075 | 2.2862686049  | -1.1837499768 |

TS 6-311++G(d,p) 0046

E(UwB97XD) = -1036.89069699 A.U.

First frequency = -1548.2866  $\text{cm}^{-1}$

|   |               |               |               |
|---|---------------|---------------|---------------|
| S | 0.4210068585  | -1.3409383298 | 0.3531049732  |
| O | -0.022149336  | -2.4890678949 | -0.4334116202 |
| O | -0.0655473427 | -1.2363271432 | 1.7300690486  |
| N | 0.0354619555  | 0.016955622   | -0.5271773809 |
| C | 0.431325582   | 1.2800362781  | 0.1147721175  |
| H | -0.0127624091 | 2.0887439576  | -0.471980226  |
| H | 0.0308610193  | 1.3528895357  | 1.1315067345  |
| C | 1.9473597099  | 1.4255800349  | 0.1363243919  |
| H | 2.266378973   | 0.1929458396  | 0.3952457676  |
| C | -1.1683068893 | -0.0341674449 | -1.3706339971 |
| H | -1.0374360573 | -0.8593428219 | -2.0722732514 |
| H | -1.1489313393 | 0.8852528613  | -1.9602586825 |
| C | -2.5074207092 | -0.2054257056 | -0.6518727779 |
| H | -2.4976307148 | -1.1693216601 | -0.1320249438 |
| H | -3.2806283931 | -0.2851997643 | -1.4276361525 |
| C | -2.9125397011 | 0.8929353079  | 0.3377726684  |
| H | -2.1183378855 | 0.9906538345  | 1.0860994243  |

|   |               |               |               |
|---|---------------|---------------|---------------|
| C | -3.1094472919 | 2.2467676414  | -0.346044405  |
| H | -3.3992176949 | 3.0106379448  | 0.3808606769  |
| H | -3.9030133452 | 2.1821063926  | -1.0990147629 |
| H | -2.2047165462 | 2.5987510302  | -0.8482551627 |
| C | -4.1866489679 | 0.4792484809  | 1.0762722265  |
| H | -5.0161320366 | 0.3498496063  | 0.3718982355  |
| H | -4.4825000101 | 1.237889022   | 1.8064194654  |
| H | -4.0456880807 | -0.466100673  | 1.6078442889  |
| C | 2.1803954351  | -1.2032837317 | 0.405052699   |
| H | 2.5372079349  | -1.5190668156 | 1.3826318769  |
| C | 2.9197658752  | -1.7049345702 | -0.803697371  |
| H | 2.4876735261  | -1.3087702534 | -1.7248972074 |
| H | 2.9005148414  | -2.7971901055 | -0.8583774329 |
| H | 3.9628883703  | -1.3857791056 | -0.7493820148 |
| C | 2.476325936   | 2.2674085431  | 1.2718737929  |
| H | 2.1451071808  | 3.3083855945  | 1.1626054753  |
| H | 2.1186474914  | 1.9043966417  | 2.2390333133  |
| H | 3.5689503015  | 2.2691348053  | 1.2829994255  |
| C | 2.5520802098  | 1.7142332404  | -1.2181810197 |
| H | 2.125334119   | 1.0662524942  | -1.9873373883 |
| H | 2.3493280515  | 2.7546503492  | -1.5032792318 |
| H | 3.6363445049  | 1.5769670535  | -1.2085965618 |
| H | 3.6363445049  | 1.5769670535  | -1.2085965618 |

TS 6-311++G(d,p) 0057

E(UwB97XD) = -1036.88792733 A.U.

First frequency = -1609.1801 cm<sup>-1</sup>

|   |               |               |               |
|---|---------------|---------------|---------------|
| S | 0.3307276497  | -1.2681015473 | 0.5031493054  |
| O | -0.3670185216 | -2.344668921  | -0.1921055631 |
| O | 0.0863513469  | -1.0906463463 | 1.9324275124  |
| N | -0.0324611985 | 0.1390625017  | -0.2718102744 |
| C | 0.6265938925  | 1.3346490825  | 0.2577312203  |
| H | 0.2187200488  | 2.193304631   | -0.2843663478 |
| H | 0.3560427807  | 1.4622436669  | 1.3095906703  |
| C | 2.1466973416  | 1.282980219   | 0.1073697476  |
| H | 2.3376491782  | 0.0042205396  | 0.3123988464  |
| C | -0.8159709853 | 0.1988581203  | -1.5050361648 |

|   |               |               |               |
|---|---------------|---------------|---------------|
| H | -1.0002293253 | -0.8272179141 | -1.8242518509 |
| H | -0.2084627989 | 0.6787377632  | -2.2803285147 |
| C | -2.1474219125 | 0.935742346   | -1.3721024951 |
| H | -2.5889550991 | 0.9341989338  | -2.3753721804 |
| H | -1.9743117714 | 1.9902727556  | -1.1220588425 |
| C | -3.1461452895 | 0.3284651574  | -0.3727084994 |
| H | -3.0040526362 | -0.7599667288 | -0.374214878  |
| C | -2.9236881702 | 0.8375816828  | 1.0540897377  |
| H | -1.9231289827 | 0.6057957981  | 1.4204387713  |
| H | -3.6445699136 | 0.3856534054  | 1.7419885067  |
| H | -3.0607402955 | 1.924570206   | 1.0931208001  |
| C | -4.5821607314 | 0.6198026821  | -0.8139258873 |
| H | -4.7557464471 | 1.7007277144  | -0.867706046  |
| H | -5.3038986654 | 0.2012630452  | -0.1064535881 |
| H | -4.7899406025 | 0.1969841132  | -1.8011921551 |
| C | 2.0844544349  | -1.371332229  | 0.3016660459  |
| H | 2.5413532172  | -1.7743130547 | 1.2024674282  |
| C | 2.5610585036  | -1.9087963749 | -1.0190637535 |
| H | 3.6303607772  | -1.7153500316 | -1.1285314556 |
| H | 2.0436731923  | -1.4335163311 | -1.8557222548 |
| H | 2.4003323695  | -2.9883395818 | -1.091087714  |
| C | 2.9025637243  | 2.0250910127  | 1.1825214864  |
| H | 3.9807058909  | 1.8830836338  | 1.0745870242  |
| H | 2.7031336475  | 3.1028126886  | 1.1165729649  |
| H | 2.6056960585  | 1.6925956884  | 2.1806958276  |
| C | 2.6387442037  | 1.5250131702  | -1.3016816121 |
| H | 2.5017966862  | 2.5802561851  | -1.5708319672 |
| H | 3.7023611537  | 1.2916747646  | -1.3960493198 |
| H | 2.0920667727  | 0.923116922   | -2.0312644759 |
| H | 2.0920667727  | 0.923116922   | -2.0312644759 |

TS 6-311++G(d,p) 0058

E(UwB97XD) = -1036.89117147 A.U.

First frequency = -1534.3514  $\text{cm}^{-1}$

|   |               |               |              |
|---|---------------|---------------|--------------|
| S | 0.6225454957  | -1.3465183879 | 0.9009615037 |
| O | -0.3625652084 | -2.3874306189 | 0.6235337594 |
| O | 1.2992828879  | -1.3956151877 | 2.1987048393 |

|   |               |               |               |
|---|---------------|---------------|---------------|
| N | -0.1454928201 | 0.1224669145  | 0.6752891523  |
| C | 0.7283775069  | 1.2711088012  | 0.9827847722  |
| H | 0.1021670383  | 2.1663476097  | 0.9377819038  |
| H | 1.1274243006  | 1.197556437   | 2.0013104019  |
| C | 1.8569211551  | 1.3895900355  | -0.0326366722 |
| H | 2.1003770228  | 0.1340401186  | -0.2415981112 |
| C | -1.5419788006 | 0.1927929057  | 1.1552206773  |
| H | -1.7016787317 | 1.2251440708  | 1.4698729407  |
| H | -1.6833493335 | -0.4218789336 | 2.0501833174  |
| C | -2.5627891539 | -0.1985841678 | 0.0896484707  |
| H | -3.5590723131 | 0.003756498   | 0.5044496081  |
| H | -2.5020072465 | -1.2765099895 | -0.0786705548 |
| C | -2.4184459429 | 0.524554369   | -1.253053152  |
| H | -1.4337206102 | 0.2668662585  | -1.6590298509 |
| C | -3.4770456513 | 0.0206487929  | -2.2343469693 |
| H | -4.4839452823 | 0.2636033105  | -1.8765563082 |
| H | -3.4179461599 | -1.0647509721 | -2.3569865135 |
| H | -3.3521775784 | 0.4802024791  | -3.2190444872 |
| C | -2.4899189212 | 2.0453775008  | -1.1142352248 |
| H | -1.6692646609 | 2.4437598905  | -0.5119138757 |
| H | -3.4314654037 | 2.3479211478  | -0.6419206162 |
| H | -2.4363402202 | 2.5271051053  | -2.0947543058 |
| C | 1.8667586415  | -1.2431535    | -0.3430212163 |
| H | 2.7726899015  | -1.7270039624 | 0.0145924295  |
| C | 1.4250023436  | -1.5339456413 | -1.7495174172 |
| H | 1.214971339   | -2.598379573  | -1.8890761035 |
| H | 2.2165595795  | -1.2492285405 | -2.4459455072 |
| H | 0.5242216731  | -0.9721185356 | -2.0045636482 |
| C | 3.1266922681  | 1.9949141778  | 0.5153154454  |
| H | 3.4757638146  | 1.4564311077  | 1.400247702   |
| H | 3.9213056024  | 1.9855730012  | -0.2346414305 |
| H | 2.9572182613  | 3.0401290037  | 0.8051577049  |
| C | 1.4133437484  | 1.9271479414  | -1.374595026  |
| H | 1.2070282825  | 3.0023173499  | -1.2963379641 |
| H | 2.1869470806  | 1.79022414    | -2.1343321041 |
| H | 0.4989157995  | 1.4367266941  | -1.7149354607 |
| H | 0.4989157995  | 1.4367266941  | -1.7149354607 |



TS 6-311++G(d,p) 0060

E(UwB97XD) = -1036.88978886 A.U.

First frequency = -1547.0664 cm<sup>-1</sup>

|   |               |               |               |
|---|---------------|---------------|---------------|
| S | 0.4121734521  | -1.3215240528 | 0.2840063825  |
| O | -0.0227272378 | -1.6867945304 | -1.0655720783 |
| O | -0.0740014167 | -2.1484082492 | 1.3866380684  |
| N | 0.0074735432  | 0.2479608285  | 0.6494574241  |
| C | 0.46292991    | 1.2384733945  | -0.3385319186 |
| H | 0.1295052756  | 0.9766566962  | -1.3486278901 |
| H | -0.0067240116 | 2.1900031159  | -0.0752686139 |
| C | 1.9788813208  | 1.3782195175  | -0.3044753512 |
| H | 2.2900650413  | 0.1332711014  | -0.1301416796 |
| C | -1.2387872573 | 0.474205499   | 1.3978717164  |
| H | -1.2401133373 | 1.5386983255  | 1.6427721119  |
| H | -1.1541574717 | -0.0646974183 | 2.3427964952  |
| C | -2.5400129518 | 0.061421145   | 0.708281122   |
| H | -3.3555729721 | 0.2539920877  | 1.4180004484  |
| H | -2.5191065484 | -1.0228460545 | 0.5557819678  |
| C | -2.868603951  | 0.7472703195  | -0.6224440992 |
| H | -2.0287808884 | 0.5847765177  | -1.3070542885 |
| C | -4.1018296121 | 0.095193663   | -1.2498932974 |
| H | -4.9740923309 | 0.211200179   | -0.5966809859 |
| H | -3.9429443903 | -0.9745326215 | -1.4127570497 |
| H | -4.3419599701 | 0.552972884   | -2.213720291  |
| C | -3.0862046876 | 2.2526401275  | -0.4622289813 |
| H | -3.3182268274 | 2.7162196867  | -1.4251199524 |
| H | -2.2091808465 | 2.7628283416  | -0.0559604323 |
| H | -3.9260023942 | 2.4469074133  | 0.2144365602  |
| C | 2.1749083773  | -1.199389824  | 0.2737773622  |
| H | 2.5286154651  | -1.1679515828 | 1.3025658114  |
| C | 2.9093440639  | -2.0941267958 | -0.6839583697 |
| H | 3.9693332248  | -1.8319214551 | -0.6764369482 |
| H | 2.5274122429  | -1.979795808  | -1.6994331043 |
| H | 2.8236638192  | -3.1488148579 | -0.4020264049 |
| C | 2.501784611   | 2.0705437583  | 0.932746499   |
| H | 2.262558978   | 3.1409216472  | 0.8957414355  |
| H | 2.048008597   | 1.6539973558  | 1.8356722601  |

|   |              |              |               |
|---|--------------|--------------|---------------|
| H | 3.5874693531 | 1.9734729056 | 1.0124432684  |
| C | 2.5936965381 | 1.8227594579 | -1.6089034174 |
| H | 2.2813219634 | 2.8471126739 | -1.8512131171 |
| H | 3.6848329796 | 1.8167375043 | -1.5507046803 |
| H | 2.2857966575 | 1.1773336971 | -2.4359564716 |
| H | 2.2857966575 | 1.1773336971 | -2.4359564716 |

TS 6-311++G(d,p) 0061

E(UwB97XD) = -1036.88694487 A.U.

First frequency = -1598.7746  $\text{cm}^{-1}$

|   |               |               |               |
|---|---------------|---------------|---------------|
| S | 0.3035917018  | -1.188942619  | 0.5549886319  |
| O | 0.0866706184  | -1.9443001754 | -0.6766911518 |
| O | -0.4238895185 | -1.6062282278 | 1.7501106662  |
| N | -0.0569627945 | 0.3930867321  | 0.2801126694  |
| C | 0.6570176948  | 1.020674228   | -0.8336052006 |
| H | 0.4566004821  | 0.4632836298  | -1.7531342507 |
| H | 0.2309296833  | 2.0198415892  | -0.9669005081 |
| C | 2.1617518131  | 1.1076854784  | -0.5881421838 |
| H | 2.3365354025  | -0.0352589987 | 0.0157528275  |
| C | -0.8873749577 | 1.1938992302  | 1.1792036366  |
| H | -0.2990589641 | 2.050191844   | 1.5266529867  |
| H | -1.113089743  | 0.5783151771  | 2.0501227584  |
| C | -2.1908559521 | 1.691705629   | 0.5570358213  |
| H | -1.9777493417 | 2.3763511882  | -0.2738280753 |
| H | -2.6740715113 | 2.3005419784  | 1.3299154462  |
| C | -3.1639270707 | 0.5989991653  | 0.0836082484  |
| H | -3.0542542881 | -0.2639505679 | 0.7531412245  |
| C | -4.6080590028 | 1.0953439162  | 0.1832307079  |
| H | -5.3115400301 | 0.3313007502  | -0.1601766973 |
| H | -4.7518953437 | 1.9857263173  | -0.4396253567 |
| H | -4.8692030591 | 1.3597102193  | 1.212092766   |
| C | -2.8671381815 | 0.1359240786  | -1.3453679867 |
| H | -2.9708414639 | 0.9746734795  | -2.0436363095 |
| H | -3.5711852353 | -0.643154667  | -1.6527619365 |
| H | -1.85918859   | -0.2684680936 | -1.4433432306 |
| C | 2.0507277621  | -1.1342744186 | 0.8302048587  |
| H | 2.2329119054  | -0.7416308621 | 1.8296506558  |

|   |              |               |               |
|---|--------------|---------------|---------------|
| C | 2.8556039394 | -2.329726871  | 0.4052752253  |
| H | 3.9185677451 | -2.1075972382 | 0.5214142738  |
| H | 2.662617724  | -2.5810188922 | -0.638603366  |
| H | 2.628788895  | -3.2090069077 | 1.0174971809  |
| C | 2.5644774523 | 2.1264025717  | 0.4541975719  |
| H | 2.0113893298 | 1.985891246   | 1.3867157436  |
| H | 3.6316167592 | 2.0576872829  | 0.6799388488  |
| H | 2.3612769951 | 3.1423093096  | 0.0926859372  |
| C | 2.9970079744 | 1.1053968956  | -1.8447185269 |
| H | 2.8232875628 | 2.0221612703  | -2.4238335458 |
| H | 4.0630449441 | 1.0637248722  | -1.608046081  |
| H | 2.7499283133 | 0.2557084305  | -2.4867320905 |
| H | 2.7499283133 | 0.2557084305  | -2.4867320905 |

TS 6-311++G(d,p) 0069

E(UwB97XD) = -1036.88692425 A.U.

First frequency = -1588.6300 cm<sup>-1</sup>

|   |               |               |               |
|---|---------------|---------------|---------------|
| S | 0.2569207734  | -1.2627772599 | 0.3948834273  |
| O | 0.1436607135  | -1.875880211  | -0.9260681108 |
| O | -0.5187926348 | -1.8419455048 | 1.4877420531  |
| N | -0.1669673102 | 0.3238705915  | 0.2655545145  |
| C | 0.5916571624  | 1.0887052826  | -0.7282497433 |
| H | 0.4483275624  | 0.6285652269  | -1.7094918491 |
| H | 0.1465844776  | 2.0863563866  | -0.7778608873 |
| C | 2.082341227   | 1.1869824214  | -0.4062310784 |
| H | 2.2670416724  | 0.0013414814  | 0.1018252817  |
| C | -0.9877539258 | 1.0062808908  | 1.2694005588  |
| H | -0.3661754123 | 1.7061195616  | 1.8393918571  |
| H | -1.3407088732 | 0.2476721698  | 1.9666887436  |
| C | -2.1754702092 | 1.7716884873  | 0.6846184243  |
| H | -1.8155208758 | 2.5905578204  | 0.0510575463  |
| H | -2.6626844539 | 2.2529300204  | 1.541036527   |
| C | -3.2335981609 | 0.9679532062  | -0.091413149  |
| H | -4.0815563839 | 1.6533822725  | -0.2144155559 |
| C | -2.7843890666 | 0.5648514638  | -1.499767069  |
| H | -2.3977412205 | 1.4273165166  | -2.052055317  |
| H | -3.6288224834 | 0.1580288868  | -2.0644292347 |

|   |               |               |               |
|---|---------------|---------------|---------------|
| H | -2.0023730079 | -0.1964796827 | -1.4711023559 |
| C | -3.7363555877 | -0.2437386676 | 0.695398615   |
| H | -4.5847039888 | -0.7077287474 | 0.1842598644  |
| H | -4.0642685476 | 0.0425878087  | 1.6999332707  |
| H | -2.9563726001 | -1.0035005213 | 0.8002062004  |
| C | 1.9807561713  | -1.1821431304 | 0.7858898925  |
| H | 2.0880416681  | -0.8889984124 | 1.8294165523  |
| C | 2.8549601882  | -2.3006323242 | 0.2934050126  |
| H | 2.7339435761  | -2.4481232422 | -0.780713835  |
| H | 2.6259885143  | -3.2454645444 | 0.7976386745  |
| H | 3.8998241371  | -2.0578062112 | 0.4983470444  |
| C | 2.4208955623  | 2.1232788173  | 0.7323529217  |
| H | 3.4842385864  | 2.0720712886  | 0.9796034346  |
| H | 2.1890424039  | 3.1594563573  | 0.4555322002  |
| H | 1.8529523109  | 1.8839757879  | 1.6349348559  |
| C | 2.9675765497  | 1.3108264166  | -1.622518253  |
| H | 4.0240279416  | 1.2756484252  | -1.3450960911 |
| H | 2.7703293819  | 0.5121314577  | -2.3425013139 |
| H | 2.7916553733  | 2.2682892985  | -2.1307502113 |
| H | 2.7916553733  | 2.2682892985  | -2.1307502113 |

TS 6-311++G(d,p) 0074

E(UwB97XD) = -1036.89086926 A.U.

First frequency = -1528.5395 cm<sup>-1</sup>

|   |               |               |               |
|---|---------------|---------------|---------------|
| S | 0.763207085   | -1.6324056787 | 0.5124090966  |
| O | 0.0383948632  | -2.7236615157 | -0.1333395549 |
| O | 1.2256603477  | -1.8556011879 | 1.8840852495  |
| N | -0.2168772139 | -0.2779159859 | 0.4112101514  |
| C | 0.3714911521  | 0.9142005665  | 1.0518702929  |
| H | -0.3901408795 | 1.6974183833  | 1.014084305   |
| H | 0.586932827   | 0.714468338   | 2.1088067791  |
| C | 1.624153969   | 1.3872779252  | 0.3263877278  |
| H | 2.1182172351  | 0.2488586269  | -0.0402139522 |
| C | -1.6490024983 | -0.5189281831 | 0.6867622046  |
| H | -1.931597028  | 0.0497401971  | 1.5773578911  |
| H | -1.7985298879 | -1.5712034712 | 0.9318764667  |
| C | -2.5240634184 | -0.1681765635 | -0.5117943989 |

|   |               |               |               |
|---|---------------|---------------|---------------|
| H | -3.5506508534 | -0.4852038899 | -0.2860191022 |
| H | -2.1846708747 | -0.7753405338 | -1.3578415911 |
| C | -2.5409286458 | 1.3089437485  | -0.920785619  |
| H | -1.504339133  | 1.6346789166  | -1.0621515162 |
| C | -3.2616839276 | 1.4750943383  | -2.2590613115 |
| H | -3.2671233498 | 2.521612573   | -2.576960964  |
| H | -4.3031352995 | 1.1435541723  | -2.1799255063 |
| H | -2.7803606266 | 0.8844706671  | -3.043898865  |
| C | -3.1846820371 | 2.1960975233  | 0.1463429603  |
| H | -2.6728340258 | 2.1302199063  | 1.1105557372  |
| H | -4.2289662857 | 1.9056126383  | 0.3062006955  |
| H | -3.1719349502 | 3.2454436487  | -0.1613104758 |
| C | 2.1473991206  | -1.0937823978 | -0.4346336692 |
| H | 3.0561460294  | -1.5073862041 | -0.0036574508 |
| C | 1.9923652248  | -1.1467390879 | -1.9283408679 |
| H | 1.0443663167  | -0.705869472  | -2.2430598492 |
| H | 2.0296233523  | -2.1766955255 | -2.2949849797 |
| H | 2.8048810181  | -0.5889076107 | -2.3989168094 |
| C | 2.6463019383  | 2.0431890226  | 1.2235493528  |
| H | 2.2459176352  | 2.9767324501  | 1.6399081078  |
| H | 2.9168004412  | 1.3946494586  | 2.0608322838  |
| H | 3.5535298964  | 2.2923462701  | 0.667993742   |
| C | 1.3503682191  | 2.1122783398  | -0.9720540627 |
| H | 0.6608241323  | 1.5485398999  | -1.6040176547 |
| H | 0.8966207725  | 3.090652606   | -0.7682669866 |
| H | 2.2731883792  | 2.281373622   | -1.5324730176 |
| H | 2.2731883792  | 2.281373622   | -1.5324730176 |

TS 6-311++G(d,p) 0077

E(UwB97XD) = -1036.88957489 A.U.

First frequency = -1523.1511 cm<sup>-1</sup>

|   |               |               |               |
|---|---------------|---------------|---------------|
| S | 0.5164455401  | -1.451707901  | -0.4483988032 |
| O | 1.3205718268  | -1.8281288943 | -1.6133585282 |
| O | -0.5629337904 | -2.3615405424 | -0.0740104964 |
| N | -0.162975813  | 0.0624714438  | -0.6417623069 |
| C | 0.8203486603  | 1.0819366933  | -1.0575599339 |
| H | 1.3462808762  | 0.7712098954  | -1.968197696  |

|   |               |               |               |
|---|---------------|---------------|---------------|
| H | 0.2551341145  | 1.9868722478  | -1.2968812353 |
| C | 1.8078731544  | 1.3788476453  | 0.0622741334  |
| H | 1.9339788326  | 0.1935144229  | 0.5593069402  |
| C | -1.4806941357 | 0.0884648856  | -1.3127213531 |
| H | -1.540416941  | -0.6731566832 | -2.0974695079 |
| H | -1.5362377353 | 1.0517144597  | -1.8218783112 |
| C | -2.6550578641 | -0.0629703418 | -0.3477943021 |
| H | -2.7055194825 | -1.0999523892 | -0.0083059478 |
| H | -3.57112522   | 0.1302867412  | -0.9214172405 |
| C | -2.6189781585 | 0.8599326672  | 0.8741347595  |
| H | -1.7157235831 | 0.6128246241  | 1.4440357888  |
| C | -2.5495998058 | 2.3381327181  | 0.4900843294  |
| H | -1.6336363213 | 2.5792899508  | -0.0554157115 |
| H | -2.5732374566 | 2.9724449195  | 1.3809128198  |
| H | -3.4010328071 | 2.614590693   | -0.1423027107 |
| C | -3.8296465818 | 0.5903520611  | 1.7682535291  |
| H | -4.7608315968 | 0.8316506268  | 1.2432090393  |
| H | -3.7913706276 | 1.1977443367  | 2.6771710097  |
| H | -3.8756634327 | -0.4614234486 | 2.0654645677  |
| C | 1.6143691294  | -1.1260688157 | 0.8931408823  |
| H | 1.032478747   | -1.014657317  | 1.8060155075  |
| C | 2.861454455   | -1.9608818696 | 0.9604487408  |
| H | 3.4067071297  | -1.9286774929 | 0.01603291    |
| H | 2.6373970953  | -3.0073437042 | 1.1927681261  |
| H | 3.5074621668  | -1.5748500952 | 1.7515327642  |
| C | 1.2207918288  | 2.1905450078  | 1.1947320536  |
| H | 1.0428566128  | 3.2226509615  | 0.8670949775  |
| H | 0.2656711726  | 1.7730949045  | 1.5220888865  |
| H | 1.8991444729  | 2.2234689696  | 2.0509973249  |
| C | 3.173592361   | 1.8150353019  | -0.4097024385 |
| H | 3.6014488245  | 1.095259734   | -1.1126391543 |
| H | 3.1112230262  | 2.7843787795  | -0.9213995389 |
| H | 3.860837268   | 1.9307776029  | 0.4318709698  |
| H | 3.860837268   | 1.9307776029  | 0.4318709698  |

TS 6-311++G(d,p) 0083

E(UwB97XD) = -1036.88868497 A.U.

First frequency = -1599.8584 cm<sup>-1</sup>

|   |               |               |               |
|---|---------------|---------------|---------------|
| S | 0.5324229418  | -1.4751636684 | 0.4315322453  |
| O | 0.5032530642  | -2.2102126687 | -0.829306079  |
| O | -0.1403868831 | -2.0562061065 | 1.5891570155  |
| N | -0.1363174929 | 0.0111887516  | 0.173843824   |
| C | 0.5113601456  | 0.8021291756  | -0.8780096244 |
| H | 0.4879763184  | 0.226805852   | -1.8065279187 |
| H | -0.1031786556 | 1.6924825672  | -1.0396907023 |
| C | 1.9512157265  | 1.188144819   | -0.5427604656 |
| H | 2.3232867426  | 0.0771570533  | 0.0327530475  |
| C | -0.9545482204 | 0.6578209843  | 1.2096892405  |
| H | -0.7330670335 | 1.7265951699  | 1.1726994921  |
| H | -0.6451498091 | 0.3067958391  | 2.1960580669  |
| C | -2.4462336495 | 0.4010339543  | 1.0169360694  |
| H | -2.9853357625 | 0.8742063456  | 1.8481813531  |
| H | -2.6154950884 | -0.6772119351 | 1.1029132027  |
| C | -3.0221804191 | 0.9023287249  | -0.3118999026 |
| H | -2.400405976  | 0.4947164782  | -1.1188920037 |
| C | -4.4435992194 | 0.3726222683  | -0.5049908261 |
| H | -5.1021808275 | 0.7346533026  | 0.2926440452  |
| H | -4.4638542629 | -0.7207358458 | -0.4868706004 |
| H | -4.8617909682 | 0.7038323709  | -1.4598772355 |
| C | -3.0048445715 | 2.4292971532  | -0.4092825205 |
| H | -3.4057609678 | 2.7621498004  | -1.3707273263 |
| H | -1.9975701571 | 2.8444677007  | -0.3133216676 |
| H | -3.6209831466 | 2.8704776274  | 0.3822349491  |
| C | 2.2277245456  | -1.0985775351 | 0.7813909738  |
| H | 2.3001730349  | -0.7360757603 | 1.8059479052  |
| C | 3.2645007093  | -2.0888118734 | 0.3309196175  |
| H | 4.2591467395  | -1.6712399717 | 0.5012645024  |
| H | 3.1561535782  | -2.3132107939 | -0.7311803034 |
| H | 3.1959155779  | -3.0287752179 | 0.8886242122  |
| C | 2.0930933168  | 2.2262471373  | 0.5478347173  |
| H | 1.5730972008  | 1.9281413724  | 1.4619968859  |
| H | 3.1443378756  | 2.3907814003  | 0.7969408709  |
| H | 1.6709745789  | 3.1846995607  | 0.2195755791  |
| C | 2.8267721659  | 1.4053581744  | -1.7525790123 |
| H | 2.4982960142  | 2.2920133627  | -2.3110605449 |
| H | 3.8671787054  | 1.5684891946  | -1.4607878507 |

|   |            |            |               |
|---|------------|------------|---------------|
| H | 2.78647139 | 0.55097209 | -2.4334683496 |
| H | 2.78647139 | 0.55097209 | -2.4334683496 |

TS 6-311++G(d,p) 0085

E(UwB97XD) = -1036.88734262 A.U.

First frequency = -1591.8900  $\text{cm}^{-1}$

|   |               |               |               |
|---|---------------|---------------|---------------|
| S | 0.8040466653  | -1.7652087255 | -0.0381417909 |
| O | 1.6406497895  | -2.2361360388 | -1.1352647142 |
| O | -0.0937949815 | -2.7133906276 | 0.6110258059  |
| N | -0.133776385  | -0.5190050016 | -0.6381700695 |
| C | 0.6881009869  | 0.5266814801  | -1.2803189369 |
| H | 1.2323388504  | 0.0408541025  | -2.0904847438 |
| H | 0.0030742939  | 1.2392876003  | -1.7442608757 |
| C | 1.6783650327  | 1.244352214   | -0.3551441728 |
| H | 1.9160409176  | 0.2812429004  | 0.4922870765  |
| C | -1.249309486  | -0.1048056519 | 0.2375937386  |
| H | -0.8806806204 | 0.3249366774  | 1.1768621771  |
| H | -1.801387249  | -1.0101776393 | 0.4912760615  |
| C | -2.1887358042 | 0.8705056893  | -0.4597844077 |
| H | -2.4018066352 | 0.490159695   | -1.4645927739 |
| H | -1.7088649216 | 1.8491299567  | -0.5807873719 |
| C | -3.5084259889 | 1.0747255198  | 0.2949768945  |
| H | -3.9926368219 | 0.0951424033  | 0.3970750305  |
| C | -3.2887755314 | 1.6486945046  | 1.6967639426  |
| H | -4.2460034786 | 1.8446216669  | 2.1876798004  |
| H | -2.7402827774 | 2.5961046726  | 1.6414519395  |
| H | -2.723559515  | 0.9683769715  | 2.3388517709  |
| C | -4.4362339394 | 1.9795816979  | -0.5163144245 |
| H | -3.9941766803 | 2.9747068377  | -0.6384215169 |
| H | -5.4007831637 | 2.1013658821  | -0.015786427  |
| H | -4.620802031  | 1.5686311332  | -1.5129631624 |
| C | 1.8520123157  | -0.9553770026 | 1.1404792999  |
| H | 1.2815937111  | -0.7519898886 | 2.0454161681  |
| C | 3.2386246804  | -1.5076777856 | 1.3190827102  |
| H | 3.2224557597  | -2.4962803689 | 1.7896494789  |
| H | 3.811687885   | -0.8391902974 | 1.9649692605  |
| H | 3.7527789887  | -1.5937027255 | 0.360697045   |



|   |              |              |               |
|---|--------------|--------------|---------------|
| C | 1.1154722667 | 2.3961720016 | 0.4496799994  |
| H | 0.2232755416 | 2.1201271179 | 1.0143150586  |
| H | 1.8578773309 | 2.7792429147 | 1.1543820886  |
| H | 0.8391265136 | 3.2194656058 | -0.2217100085 |
| C | 3.0050370771 | 1.5449100991 | -1.0151102293 |
| H | 2.8736616141 | 2.2736836578 | -1.8256852959 |
| H | 3.7129767087 | 1.9715366144 | -0.3000898174 |
| H | 3.4477772413 | 0.6440344789 | -1.4482232598 |
| H | 3.4477772413 | 0.6440344789 | -1.4482232598 |

TS 6-311++G(d,p) 0086

E(UwB97XD) = -1036.88969129 A.U.

First frequency = -1514.0989 cm<sup>-1</sup>

|   |               |               |               |
|---|---------------|---------------|---------------|
| S | 0.6512642339  | -1.6550655126 | -0.1562881668 |
| O | 1.1954802195  | -2.0580459593 | -1.4553064124 |
| O | -0.1658701506 | -2.640795339  | 0.5482187672  |
| N | -0.2720682694 | -0.2636297049 | -0.2813831369 |
| C | 0.4282610209  | 0.8439444985  | -0.9610425756 |
| H | 0.76615145    | 0.5316114657  | -1.9571644046 |
| H | -0.3067263622 | 1.6407316896  | -1.1005094391 |
| C | 1.5946844328  | 1.3620862663  | -0.1330973619 |
| H | 2.019206629   | 0.2501431418  | 0.3620886737  |
| C | -1.6723530943 | -0.4897528839 | -0.700874145  |
| H | -1.8418181346 | -1.5598657584 | -0.8270044541 |
| H | -1.8196524099 | -0.034754885  | -1.6848903473 |
| C | -2.6682875501 | 0.0403704939  | 0.3254575736  |
| H | -2.4608704043 | -0.4605248729 | 1.2769698169  |
| H | -3.6724343003 | -0.2759511425 | 0.0138865692  |
| C | -2.675125146  | 1.5582073873  | 0.5407642889  |
| H | -1.6522408255 | 1.8756856191  | 0.7721218382  |
| C | -3.1481645886 | 2.3146113587  | -0.7019631639 |
| H | -2.5265620902 | 2.1114174171  | -1.5784879806 |
| H | -3.1307522869 | 3.3944107844  | -0.5297933151 |
| H | -4.1761900465 | 2.0311636589  | -0.9534967784 |
| C | -3.5484762991 | 1.9122200461  | 1.7450712085  |
| H | -3.5532778711 | 2.9910241316  | 1.9251415447  |
| H | -3.1901240336 | 1.4182036282  | 2.652786875   |

|   |               |               |               |
|---|---------------|---------------|---------------|
| H | -4.5840582765 | 1.5959946391  | 1.5766488043  |
| C | 1.9815277638  | -1.0632657998 | 0.8392514667  |
| H | 1.6307167926  | -0.9422696043 | 1.8620899618  |
| C | 3.3149348389  | -1.7248320532 | 0.6353652694  |
| H | 3.6087174951  | -1.7022303428 | -0.41501369   |
| H | 3.3056145633  | -2.7682654385 | 0.9675618458  |
| H | 4.0684457099  | -1.1950846045 | 1.2215237052  |
| C | 1.1845697975  | 2.1604023403  | 1.0838040256  |
| H | 0.4482267817  | 1.6163204273  | 1.6805374202  |
| H | 2.0472268634  | 2.3824464059  | 1.7168851646  |
| H | 0.7360315683  | 3.1145293475  | 0.7794739054  |
| C | 2.7168669395  | 1.9556935554  | -0.9496925385 |
| H | 2.3780691349  | 2.8656289785  | -1.4622235649 |
| H | 3.5614879594  | 2.2310734408  | -0.3136545162 |
| H | 3.0685981748  | 1.2562478395  | -1.7126811708 |
| H | 3.0685981748  | 1.2562478395  | -1.7126811708 |

TS 6-311++G(d,p) 0096

E(UwB97XD) = -1036.88719294 A.U.

First frequency = -1597.9939  $\text{cm}^{-1}$

|   |               |               |               |
|---|---------------|---------------|---------------|
| S | 0.6273481697  | -1.4762691896 | -0.0351715227 |
| O | 1.0889541654  | -2.0830194347 | -1.2794346324 |
| O | -0.3796772318 | -2.1805477236 | 0.7517992598  |
| N | 0.008041193   | 0.0127331583  | -0.4004249444 |
| C | 0.9471556809  | 0.9125662097  | -1.0815886978 |
| H | 1.2755980539  | 0.4277248974  | -2.0032611939 |
| H | 0.3832563004  | 1.8044114694  | -1.372504821  |
| C | 2.1643102986  | 1.2864608452  | -0.2344571549 |
| H | 2.3600437468  | 0.1378315749  | 0.3528541532  |
| C | -1.0904116013 | 0.5696935382  | 0.4037266056  |
| H | -0.910187643  | 1.6429949969  | 0.4813553512  |
| H | -1.059745552  | 0.1677476055  | 1.4206986241  |
| C | -2.451613783  | 0.2956384534  | -0.2251853798 |
| H | -2.5508236184 | -0.7857746912 | -0.3599329247 |
| H | -2.4778377484 | 0.7465068077  | -1.2256791889 |
| C | -3.6328266067 | 0.8136713293  | 0.6024001744  |
| H | -3.5674175839 | 0.3592704196  | 1.6000887823  |

|   |               |               |               |
|---|---------------|---------------|---------------|
| C | -3.6032100488 | 2.3351421285  | 0.7689899887  |
| H | -4.484495264  | 2.6818819757  | 1.3159677201  |
| H | -3.6014216211 | 2.8277326795  | -0.2100879087 |
| H | -2.7220381273 | 2.675937569   | 1.3189538617  |
| C | -4.9520638634 | 0.3703464621  | -0.0313140229 |
| H | -5.8064552134 | 0.6946955247  | 0.5695971706  |
| H | -4.9993026239 | -0.717922268  | -0.1292845427 |
| H | -5.0623263121 | 0.8032539064  | -1.031868964  |
| C | 2.0641187383  | -1.0996127941 | 0.9308062699  |
| H | 1.7499994162  | -0.8286492174 | 1.93790105    |
| C | 3.2414847773  | -2.0256192349 | 0.8079468026  |
| H | 4.0888234242  | -1.6050430567 | 1.3536295403  |
| H | 3.5279083187  | -2.1572387886 | -0.2363890616 |
| H | 3.0263723418  | -3.0122181565 | 1.231755816   |
| C | 1.8854158422  | 2.2343427841  | 0.911068838   |
| H | 1.5559382846  | 3.2089119035  | 0.5289880929  |
| H | 1.1041178161  | 1.8549522879  | 1.5745281569  |
| H | 2.784862776   | 2.3962544866  | 1.5102722893  |
| C | 3.395691894   | 1.6114523766  | -1.0448768405 |
| H | 3.6288249909  | 0.8135538999  | -1.7549597726 |
| H | 3.2451519187  | 2.5351636071  | -1.6193954626 |
| H | 4.2628802662  | 1.765119874   | -0.3979423738 |
| H | 4.2628802662  | 1.765119874   | -0.3979423738 |

TS 6-311++G(d,p) 0097

E(UwB97XD) = -1036.88802202 A.U.

First frequency = -1516.8516  $\text{cm}^{-1}$

|   |               |               |               |
|---|---------------|---------------|---------------|
| S | 0.6415356302  | -1.2276045103 | 1.0319214233  |
| O | -0.3611023747 | -2.2783313504 | 0.8851314908  |
| O | 1.288000839   | -1.1020750517 | 2.3400750259  |
| N | -0.0903480813 | 0.2158690821  | 0.5759801964  |
| C | 0.8003534155  | 1.3787405868  | 0.7767702063  |
| H | 0.2142290997  | 2.2644156537  | 0.5146754356  |
| H | 1.0837243903  | 1.4697014567  | 1.8322842748  |
| C | 2.0413309835  | 1.3144689922  | -0.1073242235 |
| H | 2.2214762875  | 0.0375201893  | -0.1832874395 |
| C | -1.4640806144 | 0.371828579   | 1.1130717396  |

|   |               |               |               |
|---|---------------|---------------|---------------|
| H | -1.6055815277 | 1.4401763162  | 1.2936661253  |
| H | -1.5449277185 | -0.1111540257 | 2.0922686803  |
| C | -2.5565367802 | -0.1484276049 | 0.1776069857  |
| H | -3.41125857   | -0.4396019656 | 0.7982392365  |
| H | -2.2025089812 | -1.0634096121 | -0.306117425  |
| C | -3.0512938088 | 0.8435356628  | -0.8810487663 |
| H | -3.4410346402 | 1.7249496017  | -0.3534740671 |
| C | -1.9429304536 | 1.3130889649  | -1.8225043435 |
| H | -1.4653126463 | 0.4585333879  | -2.3143035757 |
| H | -1.1666406106 | 1.8679244293  | -1.2926587493 |
| H | -2.347546099  | 1.9686783485  | -2.59932131   |
| C | -4.2019966951 | 0.2239608625  | -1.6754655583 |
| H | -3.856550193  | -0.6574668702 | -2.2272544621 |
| H | -4.6080878979 | 0.9348005137  | -2.4007895155 |
| H | -5.0166911161 | -0.0912736481 | -1.0169608532 |
| C | 1.9102345236  | -1.3276012359 | -0.1818778719 |
| H | 2.7762311935  | -1.8281951403 | 0.2450111551  |
| C | 1.4763673153  | -1.7219852391 | -1.565035891  |
| H | 0.6028451401  | -1.1474850891 | -1.8803260429 |
| H | 1.2241889289  | -2.7854000851 | -1.6137822222 |
| H | 2.2878957305  | -1.5324720446 | -2.2708321025 |
| C | 3.2820462317  | 1.8893394542  | 0.534201205   |
| H | 3.1604494119  | 2.9673726195  | 0.7022273569  |
| H | 3.4824708248  | 1.4221577903  | 1.5018471452  |
| H | 4.1554851409  | 1.75198373    | -0.1077510628 |
| C | 1.8077991673  | 1.7356130977  | -1.5409405541 |
| H | 1.6188339306  | 2.8156771851  | -1.5903326821 |
| H | 2.681343035   | 1.5204122208  | -2.1614517976 |
| H | 0.9435330545  | 1.2254828461  | -1.969803531  |
| H | 0.9435330545  | 1.2254828461  | -1.969803531  |

TS 6-311++G(d,p) 0103

E(UwB97XD) = -1036.88678465 A.U.

First frequency = -1505.6764 cm<sup>-1</sup>

|   |               |               |               |
|---|---------------|---------------|---------------|
| S | 0.4195485392  | -1.4655009475 | -0.4506389837 |
| O | 1.2005382265  | -1.9204079305 | -1.6032248873 |
| O | -0.7287501044 | -2.283686968  | -0.0695537993 |

|   |               |               |               |
|---|---------------|---------------|---------------|
| N | -0.1480820261 | 0.0915844974  | -0.6750578879 |
| C | 0.9073388774  | 1.0370402573  | -1.0919565609 |
| H | 1.4050485948  | 0.6892861586  | -2.0053886395 |
| H | 0.4043525982  | 1.9793234651  | -1.3255727582 |
| C | 1.9185954082  | 1.2668197488  | 0.0225636475  |
| H | 1.9401954284  | 0.08947869    | 0.548097902   |
| C | -1.4313746425 | 0.180109643   | -1.4075536336 |
| H | -1.518681924  | -0.6235293456 | -2.1466111072 |
| H | -1.3854604849 | 1.1121119247  | -1.9744851434 |
| C | -2.661521314  | 0.2062883846  | -0.5054992509 |
| H | -2.8186701908 | -0.782444116  | -0.0663883236 |
| H | -3.5160344049 | 0.3950298424  | -1.1652771565 |
| C | -2.614722502  | 1.2711827904  | 0.6068682294  |
| H | -1.9202567584 | 2.0623382593  | 0.2934756931  |
| C | -3.9892452754 | 1.9097170867  | 0.8141797388  |
| H | -4.7282773699 | 1.1486117301  | 1.088544172   |
| H | -4.3396884876 | 2.4041489182  | -0.0965467398 |
| H | -3.9626589856 | 2.6535360976  | 1.6161813717  |
| C | -2.1001794387 | 0.6850444212  | 1.9234000285  |
| H | -1.9874181293 | 1.4623643846  | 2.6855856112  |
| H | -1.1355009338 | 0.1946413253  | 1.7847853702  |
| H | -2.8038225715 | -0.0626308538 | 2.3057642665  |
| C | 1.5293411715  | -1.2011879741 | 0.8947174521  |
| H | 0.9539938282  | -1.0454368175 | 1.8052806484  |
| C | 2.7180641171  | -2.1161803422 | 0.9753089552  |
| H | 3.3827119743  | -1.7686924206 | 1.7687651743  |
| H | 3.2702828555  | -2.1255255457 | 0.0344971756  |
| H | 2.4236702874  | -3.1441170813 | 1.2116310682  |
| C | 1.4111471692  | 2.1623869817  | 1.1302473254  |
| H | 1.3558894355  | 3.2002600944  | 0.7780436553  |
| H | 0.4113079664  | 1.8623219833  | 1.4512427967  |
| H | 2.0775847239  | 2.1386828486  | 1.9962225077  |
| C | 3.3193775039  | 1.5606186554  | -0.4576693986 |
| H | 3.3463329428  | 2.5145554928  | -1.0003692275 |
| H | 4.0134901392  | 1.6398373687  | 0.3825288123  |
| H | 3.6798779611  | 0.7824007862  | -1.1356378495 |
| H | 3.6798779611  | 0.7824007862  | -1.1356378495 |

TS 6-311++G(d,p) 0127

E(UwB97XD) = -1036.88081670 A.U.

First frequency = -1541.5430 cm<sup>-1</sup>

|   |               |               |               |
|---|---------------|---------------|---------------|
| S | 0.2920029464  | -1.2762083401 | 0.3984368658  |
| O | 0.1349810623  | -1.650824357  | -1.0064406115 |
| O | -0.4115393269 | -2.1229478668 | 1.3627815836  |
| N | -0.2105229209 | 0.2821182554  | 0.6448704353  |
| C | 0.6683483381  | 1.4490254278  | 0.4563687258  |
| H | 0.0787916469  | 2.227466424   | -0.0418138529 |
| H | 0.9353550803  | 1.8276982977  | 1.4516921638  |
| C | 1.9358838631  | 1.2096434745  | -0.3462995386 |
| H | 2.2427705333  | 0.0314039619  | 0.0952556934  |
| C | -1.3871354355 | 0.5342993474  | 1.482434591   |
| H | -1.0507970841 | 0.9787959778  | 2.4289039633  |
| H | -1.8388726093 | -0.4250055955 | 1.7270504287  |
| C | -2.4313174227 | 1.4557388326  | 0.8498392976  |
| H | -2.0146000299 | 2.459148926   | 0.708717974   |
| H | -3.2161692599 | 1.5650780505  | 1.6075654642  |
| C | -3.0836836272 | 0.9904837555  | -0.4640717636 |
| H | -3.9589321436 | 1.6379333001  | -0.5999500273 |
| C | -2.1876323462 | 1.1893741127  | -1.6904225832 |
| H | -1.8205339761 | 2.2190888331  | -1.7482424123 |
| H | -2.7473304262 | 0.9838373486  | -2.6079986966 |
| H | -1.3268702884 | 0.5188634833  | -1.6650964903 |
| C | -3.5904730848 | -0.4507669734 | -0.3825232733 |
| H | -2.7619988647 | -1.1639039608 | -0.3346212408 |
| H | -4.1839522049 | -0.6994420271 | -1.2667464704 |
| H | -4.2195716903 | -0.6037471168 | 0.5001025755  |
| C | 2.0220429758  | -1.185012565  | 0.72794676    |
| H | 2.1756384596  | -0.9693547092 | 1.7843413271  |
| C | 2.8762484477  | -2.2530919717 | 0.1051324088  |
| H | 3.9272020877  | -2.0272740141 | 0.2960158254  |
| H | 2.7188014116  | -2.3010816463 | -0.9733014923 |
| H | 2.6630609746  | -3.2400538446 | 0.5290195209  |
| C | 3.0701929727  | 2.1191501743  | 0.0692941773  |
| H | 3.9781559815  | 1.890265062   | -0.4933645708 |
| H | 2.8120515857  | 3.167352256   | -0.1300528739 |

|   |              |              |               |
|---|--------------|--------------|---------------|
| H | 3.2893735144 | 2.0275754867 | 1.1363960758  |
| C | 1.743409562  | 1.0920585476 | -1.8426248596 |
| H | 2.6756309861 | 0.7976830732 | -2.3312380046 |
| H | 0.9744925179 | 0.362819788  | -2.0991773474 |
| H | 1.4429290219 | 2.0649678268 | -2.2525321221 |
| H | 1.4429290219 | 2.0649678268 | -2.2525321221 |

## 6.2 1,6 HAT

### 6.2.1 Starting TS

TS input

$E(\text{UwB97XD}) = -1036.74769056 \text{ A.U.}$

First frequency =  $-1414.9124 \text{ cm}^{-1}$

|   |               |               |               |
|---|---------------|---------------|---------------|
| S | 0.0016658848  | 1.5396656511  | -0.0236213291 |
| O | -1.1762254625 | 2.2325237948  | 0.5104606667  |
| O | 0.8622703694  | 2.2727684352  | -0.9614147386 |
| N | -0.5436547823 | 0.1289594044  | -0.7191893867 |
| C | -1.9967481211 | -0.0036884329 | -0.9342292481 |
| H | -2.4400824438 | 0.980948911   | -1.1036770345 |
| H | -2.1303699571 | -0.5764652055 | -1.8578997905 |
| C | -2.7337691688 | -0.7039701321 | 0.2110410612  |
| H | -2.5340463256 | -0.132623717  | 1.1264064033  |
| C | 0.3920725854  | -0.5825429967 | -1.6109725658 |
| H | 0.9432782052  | 0.139434146   | -2.2230068167 |
| H | -0.2238521516 | -1.1694159317 | -2.2942130801 |
| C | 1.3544841871  | -1.5330013643 | -0.8911103749 |
| H | 1.8359396885  | -2.1558971185 | -1.6603065302 |
| H | 0.7691556254  | -2.2119406714 | -0.2622035979 |
| C | 2.4465617673  | -0.8771143192 | -0.0571651503 |
| H | 1.8295611589  | 0.0281731316  | 0.6123971818  |
| C | 3.0377844971  | -1.7927711672 | 0.9957914613  |
| H | 2.2586643176  | -2.2291842319 | 1.6291511012  |
| H | 3.744320214   | -1.2552808023 | 1.6361827619  |
| H | 3.5823538428  | -2.6196506549 | 0.5190591909  |
| C | 3.4831476283  | -0.1088838175 | -0.8544191008 |
| H | 4.175177446   | 0.4168970092  | -0.1892803994 |

|   |               |               |               |
|---|---------------|---------------|---------------|
| H | 3.0244522442  | 0.6319043819  | -1.5149682204 |
| H | 4.0716189082  | -0.8005020595 | -1.4727141946 |
| C | 1.036930057   | 0.9754975862  | 1.2853634835  |
| H | 1.7286157746  | 1.7736412202  | 1.5554604645  |
| C | 0.3541450625  | 0.2480681543  | 2.4108496597  |
| H | -0.2275517135 | -0.5984020656 | 2.0349493563  |
| H | -0.3190298829 | 0.9070955518  | 2.9698786607  |
| H | 1.1087741081  | -0.1347811484 | 3.1028754364  |
| C | -2.2464602343 | -2.1383229975 | 0.4099909693  |
| H | -2.4189956248 | -2.7361991242 | -0.4937526717 |
| H | -1.1764882751 | -2.1688462198 | 0.6339599354  |
| H | -2.7759082816 | -2.6190506632 | 1.2386030193  |
| C | -4.2394889447 | -0.665319044  | -0.0600849251 |
| H | -4.4828263902 | -1.2033729562 | -0.984577016  |
| H | -4.7934605143 | -1.1385483801 | 0.7563188851  |
| H | -4.6008322979 | 0.3632398437  | -0.162242527  |
| H | -4.6008322979 | 0.3632398437  | -0.162242527  |

### 6.2.2 Lowest TS

6311Gdp TS-relax-1-6-0001

E(UwB97XD) = -1036.89757430 A.U.

First frequency = -1485.3597 cm<sup>-1</sup>

|   |               |               |               |
|---|---------------|---------------|---------------|
| S | 0.0397371108  | 1.3307895706  | -0.6750509568 |
| O | -1.0161999307 | 2.2649983932  | -0.2983182245 |
| O | 0.5647006259  | 1.3740809975  | -2.0356131597 |
| N | -0.5548053924 | -0.190069088  | -0.4329537733 |
| C | -1.5335519925 | -0.4425575733 | 0.628129556   |
| H | -1.085954916  | -1.0958083965 | 1.3869780872  |
| H | -1.7698590011 | 0.5060868214  | 1.1134501952  |
| C | -2.8336718375 | -1.0674675945 | 0.1095817442  |
| H | -2.5897126764 | -2.0197143968 | -0.3767203055 |
| C | 0.2105672583  | -1.3358192699 | -0.9382987217 |
| H | 0.5722842562  | -1.0896898171 | -1.9367356258 |
| H | -0.5047504364 | -2.1507314316 | -1.0630770144 |
| C | 1.3559725365  | -1.7990351829 | -0.0313133804 |
| H | 1.6755913623  | -2.7912118659 | -0.3798255631 |



|   |               |               |               |
|---|---------------|---------------|---------------|
| H | 0.973055862   | -1.9434196495 | 0.9846982422  |
| C | 2.5727426715  | -0.8872086743 | 0.0075309574  |
| H | 2.0843331048  | 0.2948576871  | 0.1860426193  |
| C | 3.4599847632  | -1.1136840286 | 1.2128569631  |
| H | 4.2636040847  | -0.3735863323 | 1.2573380365  |
| H | 3.9250660085  | -2.1068110239 | 1.1622384386  |
| H | 2.8903109457  | -1.0616241439 | 2.1449248248  |
| C | 3.3305757258  | -0.7774947189 | -1.2994616931 |
| H | 3.7769542655  | -1.7456099696 | -1.5605566409 |
| H | 4.1404052719  | -0.0476820005 | -1.2184444574 |
| H | 2.6843061598  | -0.4682878465 | -2.1238170068 |
| C | 1.419065488   | 1.5083425358  | 0.4130769653  |
| H | 2.0842046363  | 2.2775401334  | 0.0249401092  |
| C | 1.1071610525  | 1.5457458546  | 1.8842436601  |
| H | 0.57746461    | 0.6446794349  | 2.2045130183  |
| H | 0.4955568251  | 2.4138049778  | 2.1479380655  |
| H | 2.0402316589  | 1.6025830656  | 2.4482825196  |
| C | -3.5202801277 | -0.1656537741 | -0.9121032658 |
| H | -3.7963028152 | 0.790908241   | -0.4562869693 |
| H | -2.8626957839 | 0.0450499247  | -1.7585465426 |
| H | -4.4301976195 | -0.6372602358 | -1.2931682087 |
| C | -3.7481058609 | -1.368614452  | 1.2970571143  |
| H | -4.6711867726 | -1.8492164382 | 0.963391477   |
| H | -3.2637168146 | -2.0330629018 | 2.0187522926  |
| H | -4.0216904844 | -0.4447638757 | 1.8184261465  |
| H | -4.0216904844 | -0.4447638757 | 1.8184261465  |

### 6.2.3 Additional TS

TS 6-31++G(d,p) 0001

E(UwB97XD) = -1036.75082395 A.U.

First frequency = -1470.8980 cm<sup>-1</sup>

|   |               |               |               |
|---|---------------|---------------|---------------|
| S | 0.0407250566  | 1.335248725   | -0.6771546977 |
| O | -1.0184178984 | 2.2744912247  | -0.2972825683 |
| O | 0.5702526206  | 1.3811551445  | -2.0427077682 |
| N | -0.5596128931 | -0.1875859549 | -0.4406349813 |
| C | -1.5357804549 | -0.4382392549 | 0.6248980499  |

|   |               |               |               |
|---|---------------|---------------|---------------|
| H | -1.0846036192 | -1.0893750995 | 1.3856736451  |
| H | -1.7721608923 | 0.5138132233  | 1.106444477   |
| C | -2.8376715061 | -1.0683359627 | 0.1116130291  |
| H | -2.5939292578 | -2.0238076577 | -0.3718579125 |
| C | 0.2095266985  | -1.3330713671 | -0.944877152  |
| H | 0.5727950002  | -1.0847516335 | -1.9437169745 |
| H | -0.50618204   | -2.149418626  | -1.0698624991 |
| C | 1.3559143808  | -1.7986924322 | -0.0369821343 |
| H | 1.6759971167  | -2.7906700894 | -0.3895712192 |
| H | 0.9715224463  | -1.9470897406 | 0.9794324614  |
| C | 2.5751725555  | -0.8869262454 | 0.0070354271  |
| H | 2.0865841899  | 0.2954172944  | 0.1857932608  |
| C | 3.4597831569  | -1.1164921605 | 1.216210046   |
| H | 4.2632978658  | -0.3747748991 | 1.265027686   |
| H | 3.9260792304  | -2.1101696036 | 1.1637748463  |
| H | 2.8867712671  | -1.0673237309 | 2.1478045187  |
| C | 3.3400847459  | -0.778290609  | -1.2981757202 |
| H | 3.7910933445  | -1.7469446996 | -1.5539146237 |
| H | 4.1479969582  | -0.044831085  | -1.2149551386 |
| H | 2.6963690765  | -0.4736895296 | -2.1278624806 |
| C | 1.4210949616  | 1.5085167744  | 0.413262097   |
| H | 2.0888971539  | 2.2806079949  | 0.0306664135  |
| C | 1.1089971368  | 1.5438886095  | 1.8863829073  |
| H | 0.5809572671  | 0.6406232519  | 2.2072018787  |
| H | 0.495073183   | 2.4112910685  | 2.1515129185  |
| H | 2.0439431216  | 1.6022465564  | 2.4493155486  |
| C | -3.5297525125 | -0.1717108499 | -0.9133028538 |
| H | -3.8077250649 | 0.7872101087  | -0.460702019  |
| H | -2.8733592135 | 0.0367826682  | -1.7629194547 |
| H | -4.4402250153 | -0.6482214618 | -1.2903315738 |
| C | -3.7494656122 | -1.3668509994 | 1.3041210538  |
| H | -4.6729356503 | -1.8518325806 | 0.9738399642  |
| H | -3.2612639996 | -2.0281796213 | 2.0279939024  |
| H | -4.0246490818 | -0.4406337947 | 1.8229071632  |
| H | -4.0246490818 | -0.4406337947 | 1.8229071632  |

TS 6-31++G(d,p) 0003

E(UwB97XD) = -1036.75058266 A.U.

First frequency = -1498.8748 cm<sup>-1</sup>

|   |               |               |               |
|---|---------------|---------------|---------------|
| S | -0.115294067  | 1.438406552   | 0.6129489832  |
| O | 0.4349690397  | 1.4825642501  | 1.969448429   |
| O | -1.1388740504 | 2.4213769012  | 0.243640011   |
| N | -0.7922428218 | -0.0676073417 | 0.4096959547  |
| C | -1.5103074727 | -0.2886251906 | -0.85472828   |
| H | -1.979260629  | 0.6590057441  | -1.1312424034 |
| H | -0.813368822  | -0.5636801626 | -1.6601483192 |
| C | -2.6020965526 | -1.3578875008 | -0.7386113127 |
| H | -2.1289881481 | -2.3225283759 | -0.5126745258 |
| C | -0.0672362636 | -1.2142485647 | 0.9826036698  |
| H | -0.820223474  | -1.9681254915 | 1.2277700893  |
| H | 0.3610149444  | -0.8880700704 | 1.9312610919  |
| C | 1.0025576119  | -1.8395119068 | 0.0780658745  |
| H | 0.5475983073  | -2.1390447228 | -0.8729388003 |
| H | 1.3303372627  | -2.7712055529 | 0.5621329917  |
| C | 2.2263216785  | -0.9714509884 | -0.1861217331 |
| H | 1.754763599   | 0.2163118231  | -0.4022417251 |
| C | 3.1334803712  | -0.7801167485 | 1.014607539   |
| H | 3.9402448447  | -0.0762395761 | 0.7877001647  |
| H | 3.5934541739  | -1.7367870705 | 1.2974806812  |
| H | 2.5878944482  | -0.3973508437 | 1.8821695599  |
| C | 2.9609756646  | -1.3201047816 | -1.4646019884 |
| H | 2.2864953356  | -1.3071725555 | -2.3271006509 |
| H | 3.3940601291  | -2.3274907692 | -1.3938596166 |
| H | 3.7799544233  | -0.6192790433 | -1.6550581732 |
| C | 1.2288820846  | 1.5085317415  | -0.533944287  |
| H | 0.8313218947  | 1.5252638599  | -1.5498901193 |
| C | 2.3272146348  | 2.4930786949  | -0.2297964952 |
| H | 1.9862018922  | 3.5293051875  | -0.3354857845 |
| H | 3.1512252775  | 2.337126898   | -0.9314213454 |
| H | 2.7048568225  | 2.3561386517  | 0.7862081911  |
| C | -3.3013723755 | -1.4958422624 | -2.0932921675 |
| H | -4.0559412238 | -2.2872082463 | -2.0581226766 |
| H | -3.8060162064 | -0.5618261927 | -2.3670376066 |
| H | -2.5901524438 | -1.7431299677 | -2.8884955714 |
| C | -3.5964981947 | -1.0265971158 | 0.373524455   |

|   |               |               |              |
|---|---------------|---------------|--------------|
| H | -4.3680112166 | -1.7996205345 | 0.4432661205 |
| H | -3.1004276457 | -0.9460150449 | 1.3448538163 |
| H | -4.0909868781 | -0.0690731119 | 0.1715161431 |
| H | -4.0909868781 | -0.0690731119 | 0.1715161431 |

TS 6-31++G(d,p) 0023

E(UwB97XD) = -1036.74946496 A.U.

First frequency = -1489.8414 cm<sup>-1</sup>

|   |               |               |               |
|---|---------------|---------------|---------------|
| S | -0.1385346976 | 1.3889934805  | 0.6843466621  |
| O | 0.708963786   | 1.6337946985  | 1.8571537799  |
| O | -1.2696856073 | 2.293713402   | 0.4491035275  |
| N | -0.7398791955 | -0.1464477755 | 0.7678521289  |
| C | -2.1583022407 | -0.430184346  | 0.5404907167  |
| H | -2.58537857   | -0.8169435758 | 1.4754954423  |
| H | -2.6585378151 | 0.5154882629  | 0.3214915504  |
| C | -2.4252273737 | -1.4237781888 | -0.5970836894 |
| H | -1.9318062132 | -2.3738708651 | -0.3504396714 |
| C | 0.1175707245  | -1.2092297092 | 1.3068687596  |
| H | -0.5525083949 | -1.9448473743 | 1.7609820194  |
| H | 0.7272466169  | -0.7982709043 | 2.1160496327  |
| C | 0.9999534352  | -1.902537127  | 0.2610512252  |
| H | 0.3633114996  | -2.2920943326 | -0.5399486797 |
| H | 1.4638772122  | -2.7756582788 | 0.7445493343  |
| C | 2.1020300623  | -1.0373442893 | -0.3361986664 |
| H | 1.5326093342  | 0.1014481926  | -0.5732909835 |
| C | 3.222362972   | -0.6870534032 | 0.6246357963  |
| H | 2.8455830216  | -0.2213014182 | 1.5400118622  |
| H | 3.9318426255  | 0.0065101096  | 0.1625800817  |
| H | 3.7757144219  | -1.5930329292 | 0.9073738151  |
| C | 2.5802133053  | -1.5076260534 | -1.6948184551 |
| H | 3.3106572003  | -0.8123246891 | -2.1203929086 |
| H | 1.7468013017  | -1.606955213  | -2.3981830857 |
| H | 3.0647516777  | -2.4902858496 | -1.6108430789 |
| C | 0.9199200661  | 1.3517398981  | -0.7285501811 |
| H | 0.3078501982  | 1.2320091796  | -1.6229721267 |
| C | 2.0037880899  | 2.3946543307  | -0.790799291  |
| H | 1.5935077966  | 3.4021477886  | -0.9255429912 |

|   |               |               |               |
|---|---------------|---------------|---------------|
| H | 2.6552718898  | 2.1812731671  | -1.6427902892 |
| H | 2.6073470145  | 2.3872108528  | 0.1197573527  |
| C | -1.8756555672 | -0.9216630567 | -1.9316230058 |
| H | -2.0978042338 | -1.6310612345 | -2.7348027043 |
| H | -2.3246769631 | 0.0432053698  | -2.1967730279 |
| H | -0.7904904229 | -0.7897926633 | -1.8933433511 |
| C | -3.9306864157 | -1.6879483394 | -0.6802953003 |
| H | -4.472187997  | -0.7687254076 | -0.9337912756 |
| H | -4.1522051172 | -2.431294051  | -1.4519044657 |
| H | -4.3248936137 | -2.0609374408 | 0.2708533212  |
| H | -4.3248936137 | -2.0609374408 | 0.2708533212  |

TS 6-31++G(d,p) 0025

E(UwB97XD) = -1036.74905115 A.U.

First frequency = -1450.6989  $\text{cm}^{-1}$

|   |               |               |               |
|---|---------------|---------------|---------------|
| S | 0.0486565539  | 1.5119244494  | -0.5866256361 |
| O | -0.998011912  | 2.4420418002  | -0.1482495638 |
| O | 0.7047090686  | 1.7751426717  | -1.874947652  |
| N | -0.6174138217 | -0.0150038815 | -0.5732222557 |
| C | -2.0790850909 | -0.1581876543 | -0.5749918824 |
| H | -2.5101612103 | 0.7722631778  | -0.2004972809 |
| H | -2.4341504453 | -0.2996745952 | -1.6057809552 |
| C | -2.5586431568 | -1.3216785581 | 0.3013001503  |
| H | -2.0990505815 | -2.249824747  | -0.0655008    |
| C | 0.1494261408  | -1.0715954779 | -1.2572548106 |
| H | 0.7295872797  | -0.636021444  | -2.0767839718 |
| H | -0.5782247978 | -1.7438713624 | -1.7184081454 |
| C | 1.0505292874  | -1.864510028  | -0.3072560923 |
| H | 1.4009378983  | -2.7617271672 | -0.8387972058 |
| H | 0.444792656   | -2.2125540487 | 0.5361732697  |
| C | 2.263060803   | -1.0963306498 | 0.2023793802  |
| H | 1.830419132   | 0.099943795   | 0.4090456344  |
| C | 2.7676486941  | -1.5621592555 | 1.5525083418  |
| H | 3.1557435507  | -2.5877048133 | 1.4805589628  |
| H | 1.9664793983  | -1.5614809167 | 2.2987325162  |
| H | 3.580124345   | -0.9243947104 | 1.9150656288  |
| C | 3.3575314789  | -0.8936360785 | -0.8285796095 |

|   |               |               |               |
|---|---------------|---------------|---------------|
| H | 4.1342045728  | -0.22250149   | -0.4487770148 |
| H | 2.9697591579  | -0.4669410347 | -1.7585811565 |
| H | 3.8318292287  | -1.8541796582 | -1.0707181316 |
| C | 1.3257088745  | 1.3942908561  | 0.6248961486  |
| H | 2.1432092825  | 2.0565463157  | 0.3402958779  |
| C | 0.8844491561  | 1.4385245196  | 2.0627497819  |
| H | 1.7384428451  | 1.2152541629  | 2.7079459613  |
| H | 0.1028168483  | 0.7010020006  | 2.2605167699  |
| H | 0.4998213495  | 2.4269370366  | 2.3346513687  |
| C | -4.0757126646 | -1.4609353742 | 0.1514306383  |
| H | -4.3626865627 | -1.6172682485 | -0.8936917071 |
| H | -4.4458113216 | -2.3099550965 | 0.7338808737  |
| H | -4.5852737686 | -0.5591317108 | 0.5112753689  |
| C | -2.1606976069 | -1.1345820517 | 1.7646436944  |
| H | -2.5374519949 | -1.9599502848 | 2.376837986   |
| H | -1.0739625136 | -1.0986577696 | 1.8783577623  |
| H | -2.5739417411 | -0.1997450693 | 2.162268328   |
| H | -2.5739417411 | -0.1997450693 | 2.162268328   |

TS 6-31++G(d,p) 0035

E(UwB97XD) = -1036.74987872 A.U.

First frequency = -1472.4461  $\text{cm}^{-1}$

|   |               |               |               |
|---|---------------|---------------|---------------|
| S | 0.0993341968  | 1.15365222    | -1.0089247259 |
| O | -0.9129536379 | 2.1975995961  | -0.8225821308 |
| O | 0.60785454    | 0.8893535426  | -2.3577951522 |
| N | -0.5649587237 | -0.2491379507 | -0.4479880165 |
| C | -1.5872110129 | -0.1960004564 | 0.6067588193  |
| H | -1.404196809  | -1.0428710585 | 1.2802185305  |
| H | -1.4627829089 | 0.7126960942  | 1.2015283706  |
| C | -3.025102047  | -0.2500437633 | 0.0774898715  |
| H | -3.1671191141 | 0.6381140917  | -0.5499745959 |
| C | 0.1406999252  | -1.5160904978 | -0.6824286578 |
| H | 0.5136946214  | -1.5122921699 | -1.7086770086 |
| H | -0.6172639339 | -2.3008322857 | -0.6295409315 |
| C | 1.2632508915  | -1.8240389896 | 0.3165576829  |
| H | 1.5275087559  | -2.886486342  | 0.2051865266  |
| H | 0.871653408   | -1.7106408854 | 1.3351013217  |

|   |               |               |               |
|---|---------------|---------------|---------------|
| C | 2.5306115018  | -0.9939472557 | 0.1597469944  |
| H | 2.1077405817  | 0.222309462   | 0.0534082685  |
| C | 3.4059123268  | -0.9835437374 | 1.3970460834  |
| H | 4.2471942748  | -0.2929782407 | 1.2807611028  |
| H | 3.819580242   | -1.9851619136 | 1.5790990727  |
| H | 2.8393794662  | -0.6914703194 | 2.287180714   |
| C | 3.2957390875  | -1.2322777254 | -1.1280129753 |
| H | 2.6671410413  | -1.0948596654 | -2.0121124519 |
| H | 3.6924339964  | -2.2566110039 | -1.1480740502 |
| H | 4.1425110866  | -0.543900226  | -1.2096090943 |
| C | 1.5097655379  | 1.4886710984  | 0.0042051233  |
| H | 2.205964982   | 2.1178826747  | -0.550721218  |
| C | 1.2418595383  | 1.8684998578  | 1.4371301758  |
| H | 0.7231715123  | 1.0684337051  | 1.9744665503  |
| H | 0.6390174386  | 2.779826643   | 1.5120111513  |
| H | 2.1940075058  | 2.0459682478  | 1.9432802801  |
| C | -3.9968731851 | -0.1755499975 | 1.2571802455  |
| H | -3.879700378  | -1.0459440333 | 1.9146850577  |
| H | -3.8314659724 | 0.7260434958  | 1.8566472282  |
| H | -5.0329564279 | -0.1605677293 | 0.9056641762  |
| C | -3.2830197182 | -1.4913889685 | -0.7762430065 |
| H | -2.6220938485 | -1.5199588609 | -1.6477553045 |
| H | -3.1258073017 | -2.4073057265 | -0.1923450826 |
| H | -4.3155249442 | -1.5000195565 | -1.1393419573 |
| H | -4.3155249442 | -1.5000195565 | -1.1393419573 |

TS 6-31++G(d,p) 0036

E(UwB97XD) = -1036.74769056 A.U.

First frequency = -1414.9771  $\text{cm}^{-1}$

|   |               |               |               |
|---|---------------|---------------|---------------|
| S | -0.0353824085 | 1.4178242528  | -0.331098641  |
| O | -1.125807     | 2.2543159066  | 0.1826919515  |
| O | 0.6662416074  | 1.871162338   | -1.5392959088 |
| N | -0.6655769802 | -0.1052972316 | -0.5640174995 |
| C | -2.1331019408 | -0.2460387046 | -0.5204908562 |
| H | -2.6066420509 | 0.678041097   | -0.8619648848 |
| H | -2.39914266   | -1.025779413  | -1.2418234746 |
| C | -2.6815971181 | -0.619694192  | 0.8596446747  |

|   |               |               |               |
|---|---------------|---------------|---------------|
| H | -2.3513849539 | 0.1546904543  | 1.5635659281  |
| C | 0.1315601421  | -1.0416552144 | -1.3794374731 |
| H | 0.5768219857  | -0.5096180705 | -2.2269877379 |
| H | -0.5747587922 | -1.7618133161 | -1.795476279  |
| C | 1.2010228535  | -1.8109913706 | -0.5970227451 |
| H | 1.5667839338  | -2.6183202645 | -1.2496316398 |
| H | 0.7242016065  | -2.2962108815 | 0.2610526643  |
| C | 2.4000874214  | -1.0000563642 | -0.1248616384 |
| H | 1.8825603766  | 0.0599672388  | 0.3820409822  |
| C | 3.1525745522  | -1.6425986817 | 1.0230110082  |
| H | 3.6268605889  | -2.5769218692 | 0.6918772039  |
| H | 2.482428149   | -1.8861747764 | 1.8537955294  |
| H | 3.9425150984  | -0.9834246703 | 1.3967415666  |
| C | 3.2967536443  | -0.4830458818 | -1.2334690935 |
| H | 3.7918567121  | -1.3226930688 | -1.7402113938 |
| H | 4.0761041349  | 0.1714553166  | -0.8309750262 |
| H | 2.7362911927  | 0.0835009833  | -1.9820683162 |
| C | 1.1914004457  | 1.166686072   | 0.908014813   |
| H | 1.9081342771  | 1.9869374702  | 0.8645369341  |
| C | 0.6938752257  | 0.7604421867  | 2.2679681689  |
| H | 0.1064415177  | 1.5561731679  | 2.7388504947  |
| H | 1.5482038605  | 0.539949735   | 2.9132911818  |
| H | 0.0704533775  | -0.1360325156 | 2.2058332652  |
| C | -2.155785685  | -1.9732627463 | 1.3348170682  |
| H | -2.4571261335 | -2.7712313926 | 0.644588538   |
| H | -1.0640065736 | -1.9776216422 | 1.3974837659  |
| H | -2.5491281122 | -2.2185839017 | 2.3263372432  |
| C | -4.2113064771 | -0.6068338525 | 0.8146687577  |
| H | -4.5863306317 | -1.3500432516 | 0.1002470407  |
| H | -4.630816425  | -0.8471866952 | 1.7962937859  |
| H | -4.5940031716 | 0.3741499832  | 0.5144157127  |
| H | -4.5940031716 | 0.3741499832  | 0.5144157127  |

TS 6-31++G(d,p) 0038

E(U<sub>w</sub>B97XD) = -1036.74736516 A.U.

First frequency = -1465.3598 cm<sup>-1</sup>

|   |               |              |               |
|---|---------------|--------------|---------------|
| S | -0.1023863868 | 1.2588197009 | -0.4641024432 |
|---|---------------|--------------|---------------|



|   |               |               |               |
|---|---------------|---------------|---------------|
| O | -1.1166215436 | 2.1420969718  | 0.1212064547  |
| O | 0.069138709   | 1.2635601002  | -1.9212641811 |
| N | -0.4255632185 | -0.2824478305 | 0.0494511342  |
| C | -1.5588429951 | -0.5511460567 | 0.9391118974  |
| H | -1.2005862261 | -1.2384029999 | 1.717141839   |
| H | -1.8336901185 | 0.3855998347  | 1.4284255538  |
| C | -2.7936827509 | -1.154624305  | 0.2543648927  |
| H | -2.5088805322 | -2.1254762875 | -0.1730399968 |
| C | 0.1020717028  | -1.4354821067 | -0.6987175492 |
| H | -0.5169425024 | -1.6371069159 | -1.5815530443 |
| H | -0.0196542545 | -2.2849772358 | -0.019102644  |
| C | 1.5692496251  | -1.349370268  | -1.1334363391 |
| H | 1.6544726557  | -0.7263483576 | -2.0286296334 |
| H | 1.8649538087  | -2.3651175939 | -1.4338024928 |
| C | 2.5395337627  | -0.8349528014 | -0.0830833656 |
| H | 2.1246733861  | 0.3728822147  | 0.083865672   |
| C | 2.441495652   | -1.4967661393 | 1.276159678   |
| H | 2.7051870255  | -2.561085038  | 1.2003014194  |
| H | 1.4307007469  | -1.4304510195 | 1.6896167093  |
| H | 3.1302016922  | -1.0326642489 | 1.9887242759  |
| C | 3.9555524739  | -0.681945906  | -0.5996931223 |
| H | 3.9793014646  | -0.1073355858 | -1.5311426138 |
| H | 4.3978471007  | -1.66712146   | -0.8021666633 |
| H | 4.5911720723  | -0.1766805686 | 0.1343368801  |
| C | 1.4723799223  | 1.602890369   | 0.2621226154  |
| H | 2.0101049829  | 2.3277118724  | -0.3489360272 |
| C | 1.4601206934  | 1.832031035   | 1.7500192039  |
| H | 2.4889744723  | 1.8604723229  | 2.1191572114  |
| H | 0.9364370175  | 1.0229815629  | 2.2684267139  |
| H | 0.9755787986  | 2.7786898219  | 2.0104883467  |
| C | -3.3170372323 | -0.2670059246 | -0.8740748252 |
| H | -4.1925635432 | -0.7234442933 | -1.3464974363 |
| H | -3.6070716595 | 0.7170508739  | -0.489617816  |
| H | -2.5599191831 | -0.1112929311 | -1.6493552531 |
| C | -3.8709920348 | -1.4082326385 | 1.3116100111  |
| H | -4.7457533318 | -1.8918194516 | 0.8664340969  |
| H | -3.5009700445 | -2.0545580287 | 2.1148505655  |
| H | -4.2018813361 | -0.4645225292 | 1.7616000961  |

H -4.2018813361 -0.4645225292 1.7616000961

TS 6-31++G(d,p) 0039

E(UwB97XD) = -1036.74591605 A.U.

First frequency = -1491.1041  $\text{cm}^{-1}$

|   |               |               |               |
|---|---------------|---------------|---------------|
| S | -0.0491099305 | 1.4410536004  | 0.7243009452  |
| O | 0.6366450031  | 1.4229232135  | 2.0181665985  |
| O | -1.073582208  | 2.465106045   | 0.4951082804  |
| N | -0.7897425537 | -0.0398365298 | 0.5456535834  |
| C | -1.664935779  | -0.1894891935 | -0.6294668275 |
| H | -2.0604103257 | 0.8045706943  | -0.8420555248 |
| H | -1.0914151788 | -0.508954537  | -1.5128652061 |
| C | -2.8444257747 | -1.1564092257 | -0.3938600413 |
| H | -3.045064582  | -1.1688886867 | 0.6845827978  |
| C | -0.0412687676 | -1.2207215656 | 1.0079756628  |
| H | -0.7879842374 | -1.9683014013 | 1.2860068277  |
| H | 0.4684513007  | -0.9431408611 | 1.9314923741  |
| C | 0.9426542176  | -1.8225824125 | -0.0040308008 |
| H | 0.4150680026  | -2.053045389  | -0.9362998342 |
| H | 1.2746008863  | -2.7896604073 | 0.4021619084  |
| C | 2.1705345395  | -0.9754489012 | -0.3118664655 |
| H | 1.7063676499  | 0.2213676257  | -0.4750837231 |
| C | 3.1488592989  | -0.8336069478 | 0.8385633792  |
| H | 3.9647518154  | -0.1530758726 | 0.5758442659  |
| H | 3.5916020242  | -1.8094276425 | 1.0807874945  |
| H | 2.6664461933  | -0.4464663184 | 1.740601321   |
| C | 2.8237293372  | -1.3082324419 | -1.6380719489 |
| H | 2.1022400875  | -1.2611083938 | -2.4602832053 |
| H | 3.2385081274  | -2.3255126101 | -1.6151746147 |
| H | 3.6454818286  | -0.6196228864 | -1.8586103386 |
| C | 1.1741602011  | 1.5157878026  | -0.5495688896 |
| H | 0.6773585654  | 1.540161664   | -1.520839111  |
| C | 2.3023231084  | 2.4930288303  | -0.3486808311 |
| H | 1.9571695517  | 3.53168093    | -0.4057143705 |
| H | 3.0485796912  | 2.3430303752  | -1.1336497889 |
| H | 2.782510366   | 2.341384429   | 0.6209561099  |
| C | -2.5522025007 | -2.58556045   | -0.8666438674 |

|   |               |               |               |
|---|---------------|---------------|---------------|
| H | -1.6855207402 | -3.0298001982 | -0.3702593239 |
| H | -3.4118244194 | -3.2349165187 | -0.673937253  |
| H | -2.3601032594 | -2.596869929  | -1.9461935337 |
| C | -4.0917261611 | -0.6212095679 | -1.1061695842 |
| H | -3.9100968685 | -0.5240032617 | -2.1834787785 |
| H | -4.9385805535 | -1.301087628  | -0.9710762267 |
| H | -4.3786407943 | 0.3620022741  | -0.7204676269 |
| H | -4.3786407943 | 0.3620022741  | -0.7204676269 |

TS 6-31++G(d,p) 0047

E(UwB97XD) = -1036.74574453 A.U.

First frequency = -1512.4594  $\text{cm}^{-1}$

|   |               |               |               |
|---|---------------|---------------|---------------|
| S | -0.2096139196 | 1.4308281452  | 0.6902567621  |
| O | 0.7418893461  | 1.8665021999  | 1.7159000637  |
| O | -1.4015009252 | 2.2490266351  | 0.4458387845  |
| N | -0.744946934  | -0.0726602845 | 1.1249953736  |
| C | -1.9971294553 | -0.5966739016 | 0.5632320506  |
| H | -2.2476942925 | -1.4495006526 | 1.2016136437  |
| H | -2.7761336407 | 0.1532522554  | 0.7219681777  |
| C | -1.987023329  | -1.0386217904 | -0.9245399064 |
| H | -0.9433429635 | -1.1093276682 | -1.2508138588 |
| C | 0.2298541356  | -1.0276559897 | 1.6702326194  |
| H | -0.3278280687 | -1.6782999868 | 2.350567527   |
| H | 0.9365491046  | -0.465007193  | 2.2831624938  |
| C | 0.9713518168  | -1.8885846167 | 0.639034455   |
| H | 0.2433258769  | -2.4464009345 | 0.0407040622  |
| H | 1.5442681139  | -2.6422476072 | 1.1997485456  |
| C | 1.9293575204  | -1.1302450793 | -0.2713176942 |
| H | 1.3187024701  | -0.023510973  | -0.5720426286 |
| C | 3.1941427118  | -0.6494505108 | 0.4152922783  |
| H | 3.7960284539  | -0.0312705234 | -0.2579209848 |
| H | 3.8082892835  | -1.507347561  | 0.7209616272  |
| H | 2.9738192885  | -0.057285855  | 1.3087353335  |
| C | 2.1705683993  | -1.8005651303 | -1.6083667418 |
| H | 2.6842178838  | -2.7615462266 | -1.4669094968 |
| H | 2.7980501136  | -1.1798982298 | -2.2557463585 |
| H | 1.2289550068  | -2.0017017192 | -2.1302827422 |

|   |               |               |               |
|---|---------------|---------------|---------------|
| C | 0.6999504857  | 1.2091377994  | -0.8125562539 |
| H | 0.0053062935  | 0.9911569377  | -1.6240858381 |
| C | 1.7711010617  | 2.2240417172  | -1.1130135567 |
| H | 2.3323070929  | 1.8991400827  | -1.9935549378 |
| H | 2.4640999964  | 2.3232951442  | -0.2746635032 |
| H | 1.3470316871  | 3.211241578   | -1.3297891533 |
| C | -2.7006254345 | -0.0203483798 | -1.8203327281 |
| H | -2.2912542973 | 0.9868624736  | -1.7004846029 |
| H | -2.6207526182 | -0.3047847948 | -2.8743043655 |
| H | -3.7656246998 | 0.0280652772  | -1.5640779809 |
| C | -2.6183571926 | -2.4248752517 | -1.0780992606 |
| H | -3.6548041462 | -2.41899631   | -0.7203169813 |
| H | -2.6282996115 | -2.7368286505 | -2.1270519527 |
| H | -2.0693074827 | -3.1791348701 | -0.5038731622 |
| H | -2.0693074827 | -3.1791348701 | -0.5038731622 |

TS 6-31++G(d,p) 0048

E(UwB97XD) = -1036.74629280 A.U.

First frequency = -1478.5027 cm<sup>-1</sup>

|   |               |               |               |
|---|---------------|---------------|---------------|
| S | -0.1984707244 | 1.1807405155  | 0.364435835   |
| O | -0.2088337832 | 1.0827255283  | 1.8288625762  |
| O | -1.1360130687 | 2.1146688889  | -0.2704525166 |
| N | -0.452402509  | -0.3161011719 | -0.3015687675 |
| C | -1.5363647155 | -0.5226884094 | -1.2679719553 |
| H | -1.7784462539 | 0.443869131   | -1.7145926092 |
| H | -1.133973498  | -1.1630419813 | -2.063721756  |
| C | -2.8115978373 | -1.1616275561 | -0.6983185029 |
| H | -2.5554929578 | -2.160237629  | -0.3196425781 |
| C | 0.0108235401  | -1.5160915568 | 0.4154151025  |
| H | -0.059530116  | -2.3228488144 | -0.3209488005 |
| H | -0.6744419838 | -1.765075556  | 1.23500078    |
| C | 1.4400113344  | -1.4621450717 | 0.9646380154  |
| H | 1.7096544116  | -2.4927697372 | 1.2368364766  |
| H | 1.4574416941  | -0.8840896175 | 1.8941154483  |
| C | 2.4865952909  | -0.8989324229 | 0.0179622551  |
| H | 2.0763300794  | 0.3129507402  | -0.1140499534 |
| C | 3.8595141946  | -0.7800745591 | 0.6477272557  |

|   |               |               |               |
|---|---------------|---------------|---------------|
| H | 4.5486988815  | -0.235970993  | -0.0056492534 |
| H | 4.2863392856  | -1.7766967077 | 0.8269520632  |
| H | 3.8131850967  | -0.2601956885 | 1.610135354   |
| C | 2.488223373   | -1.4812219879 | -1.3803799975 |
| H | 1.5160548102  | -1.3644516325 | -1.8687053481 |
| H | 2.7240035199  | -2.554129491  | -1.3475996268 |
| H | 3.2420874799  | -0.9930333532 | -2.0054859386 |
| C | 1.4491568304  | 1.5659472035  | -0.1537465116 |
| H | 1.4273966568  | 1.7812625828  | -1.2227809846 |
| C | 2.2233354122  | 2.5189784454  | 0.7161927901  |
| H | 2.2550972114  | 2.16770076    | 1.7504248376  |
| H | 1.7905819714  | 3.5263010995  | 0.7083993111  |
| H | 3.2479816359  | 2.5911077829  | 0.3414934388  |
| C | -3.8229191196 | -1.3391185484 | -1.8335952684 |
| H | -3.4056118281 | -1.9326073817 | -2.6542077089 |
| H | -4.7236785441 | -1.846616611  | -1.4753683798 |
| H | -4.1247040127 | -0.3659006013 | -2.2389702659 |
| C | -3.4034761151 | -0.3486368052 | 0.452409509   |
| H | -3.6764108645 | 0.6577019908  | 0.1161137171  |
| H | -4.3033359427 | -0.8354614461 | 0.8414770872  |
| H | -2.6948630715 | -0.2429072596 | 1.2801439473  |
| H | -2.6948630715 | -0.2429072596 | 1.2801439473  |

TS 6-31++G(d,p) 0056

E(UwB97XD) = -1036.74710434 A.U.

First frequency = -1479.3553 cm<sup>-1</sup>

|   |               |               |               |
|---|---------------|---------------|---------------|
| S | -0.1839779647 | 1.3608017172  | 0.6013398645  |
| O | 0.4139413646  | 1.6198622821  | 1.9174144334  |
| O | -1.3110319593 | 2.2067039063  | 0.1884887     |
| N | -0.6801967175 | -0.2255532771 | 0.4865412758  |
| C | -2.1153641359 | -0.512876439  | 0.3476108764  |
| H | -2.464792128  | -1.0005455085 | 1.2675870742  |
| H | -2.6573766657 | 0.4302012884  | 0.2522573527  |
| C | -2.4182698403 | -1.3927968836 | -0.8706513875 |
| H | -1.8008496995 | -2.2996685486 | -0.8057006295 |
| C | 0.0620020145  | -1.2440936792 | 1.2555651321  |
| H | -0.2943730093 | -2.2019249605 | 0.8666785884  |

|   |               |               |               |
|---|---------------|---------------|---------------|
| H | -0.2251253192 | -1.1959914254 | 2.3143482515  |
| C | 1.5890295358  | -1.1983400705 | 1.1486564945  |
| H | 1.9608840487  | -2.1489645927 | 1.5569174077  |
| H | 1.9804638315  | -0.4098751959 | 1.7992261454  |
| C | 2.1461593964  | -0.997264189  | -0.2508387979 |
| H | 1.681644228   | 0.1685028349  | -0.5314539883 |
| C | 3.6518122086  | -0.8279683312 | -0.2757436684 |
| H | 4.0011001767  | -0.5437149766 | -1.2733302558 |
| H | 4.1468164842  | -1.7708402801 | -0.0049324642 |
| H | 3.9802892954  | -0.0637578821 | 0.4360279415  |
| C | 1.6101061986  | -1.9342686372 | -1.3127286444 |
| H | 1.9991777601  | -1.6697003992 | -2.3007677258 |
| H | 0.5182563025  | -1.9123236991 | -1.3609691742 |
| H | 1.9181803167  | -2.9670258878 | -1.0972452784 |
| C | 1.0920066892  | 1.4397137928  | -0.6211814126 |
| H | 0.6232579646  | 1.4138524351  | -1.6053412506 |
| C | 2.1603737971  | 2.4775752844  | -0.4068932543 |
| H | 2.6208672873  | 2.3697518655  | 0.5781213738  |
| H | 1.7655724512  | 3.496713156   | -0.492309974  |
| H | 2.934719981   | 2.3528936665  | -1.1686435572 |
| C | -2.0792817459 | -0.6688279598 | -2.1734765288 |
| H | -2.2494551119 | -1.3194521906 | -3.0370529948 |
| H | -2.7044192544 | 0.2242219838  | -2.2916040231 |
| H | -1.0320367684 | -0.35271946   | -2.1898104812 |
| C | -3.887150052  | -1.8202017101 | -0.8364101262 |
| H | -4.1251289333 | -2.461189295  | -1.6907032179 |
| H | -4.1217761081 | -2.3746140309 | 0.0783168837  |
| H | -4.5463944361 | -0.9449493022 | -0.8802726329 |
| H | -4.5463944361 | -0.9449493022 | -0.8802726329 |

TS 6-31++G(d,p) 0057

E(UwB97XD) = -1036.74664644 A.U.

First frequency = -1413.5217 cm<sup>-1</sup>

|   |               |               |               |
|---|---------------|---------------|---------------|
| S | 0.0128165588  | 1.4627819953  | -0.5861396184 |
| O | -1.0573731221 | 2.3473887432  | -0.1105080031 |
| O | 0.5755568616  | 1.724408858   | -1.9180211258 |
| N | -0.5664811222 | -0.1098904436 | -0.4907062679 |

|   |               |               |               |
|---|---------------|---------------|---------------|
| C | -2.0302131496 | -0.2835092392 | -0.5012286477 |
| H | -2.495626506  | 0.6733998735  | -0.2578537357 |
| H | -2.3503804237 | -0.5580936416 | -1.5165552281 |
| C | -2.5152456056 | -1.3365424761 | 0.5027533372  |
| H | -1.9797519732 | -2.2776054862 | 0.3188772126  |
| C | 0.1228662074  | -1.1257644083 | -1.3171892817 |
| H | -0.1743812279 | -1.0111221632 | -2.3683246935 |
| H | -0.2764903281 | -2.0825106761 | -0.9715808173 |
| C | 1.6517538643  | -1.1670302675 | -1.2371267645 |
| H | 2.0763409518  | -0.3890565409 | -1.879536347  |
| H | 1.9612350426  | -2.1285344365 | -1.6707572505 |
| C | 2.2457571356  | -1.0245426027 | 0.1538055237  |
| H | 1.8769330924  | 0.1664712533  | 0.4359758016  |
| C | 1.6590460912  | -1.9291339102 | 1.216809592   |
| H | 1.9013868608  | -2.9781422836 | 0.9955806435  |
| H | 0.5709269791  | -1.8399668342 | 1.2697956822  |
| H | 2.0703269973  | -1.6935078487 | 2.2031956528  |
| C | 3.7597125615  | -0.9640525135 | 0.1558314711  |
| H | 4.1296609212  | -0.2155408683 | -0.5522300706 |
| H | 4.1810817045  | -1.9363777133 | -0.1337686407 |
| H | 4.1433268388  | -0.7181900574 | 1.1510223137  |
| C | 1.3471856071  | 1.4632864582  | 0.5733332629  |
| H | 2.1279667701  | 2.1290094137  | 0.2059385925  |
| C | 0.9710381658  | 1.5886306819  | 2.0245071     |
| H | 1.8660119301  | 1.451419994   | 2.6374981856  |
| H | 0.2401605325  | 0.8290117197  | 2.3115642318  |
| H | 0.5483146537  | 2.5731924804  | 2.2491884899  |
| C | -4.0062465798 | -1.5938711669 | 0.2697206739  |
| H | -4.1984611625 | -1.9423972098 | -0.750350191  |
| H | -4.3811817422 | -2.352910902  | 0.9628796493  |
| H | -4.5872221348 | -0.6776024167 | 0.4295942596  |
| C | -2.248781202  | -0.9045062082 | 1.9438123846  |
| H | -2.5955802973 | -1.6662885299 | 2.6490942885  |
| H | -1.1817990694 | -0.7453091835 | 2.1173474039  |
| H | -2.7716829268 | 0.0325353771  | 2.1698632521  |
| H | -2.7716829268 | 0.0325353771  | 2.1698632521  |

TS 6-31++G(d,p) 0058

E(UwB97XD) = -1036.74524745 A.U.

First frequency = -1495.7227 cm<sup>-1</sup>

|   |               |               |               |
|---|---------------|---------------|---------------|
| S | 0.0030356479  | 1.0882067806  | -0.9875625658 |
| O | -1.0246964756 | 2.0957310929  | -0.7055945635 |
| O | 0.3208546297  | 0.7737587128  | -2.3838675839 |
| N | -0.4614951082 | -0.3053797669 | -0.2387455642 |
| C | -1.4993132926 | -0.2608672284 | 0.7983076351  |
| H | -1.2828645203 | -1.0832360953 | 1.4921215747  |
| H | -1.3907949004 | 0.6679511065  | 1.3646052741  |
| C | -2.9475030798 | -0.3735236816 | 0.3053890952  |
| H | -3.1419004344 | 0.49984822    | -0.3281697574 |
| C | 0.0982288348  | -1.6007522131 | -0.6640548416 |
| H | -0.3945520448 | -1.9514845279 | -1.5766890883 |
| H | -0.1721942843 | -2.2985654387 | 0.1323889329  |
| C | 1.6165843492  | -1.6461957038 | -0.8882361865 |
| H | 1.8535884544  | -1.2343908151 | -1.8738965681 |
| H | 1.8940593602  | -2.7099539736 | -0.923532916  |
| C | 2.4688748708  | -0.9392422304 | 0.1514947422  |
| H | 2.1049404717  | 0.2891069601  | -0.0041763789 |
| C | 2.1662001382  | -1.2873633398 | 1.5943413161  |
| H | 2.3888388426  | -2.3469502049 | 1.7833015298  |
| H | 1.1152200203  | -1.118321214  | 1.846098595   |
| H | 2.777618432   | -0.6912268813 | 2.2786002685  |
| C | 3.9457677886  | -0.9355012411 | -0.1875972879 |
| H | 4.1190139512  | -0.5755581967 | -1.2067737574 |
| H | 4.3577354597  | -1.9515415718 | -0.1163446097 |
| H | 4.5077354865  | -0.2994384589 | 0.50362685    |
| C | 1.5166702886  | 1.5477627111  | -0.1915785794 |
| H | 2.1529584566  | 2.0838090033  | -0.8957107663 |
| C | 1.3861294419  | 2.131317042   | 1.1908125824  |
| H | 2.3839764145  | 2.2766816142  | 1.6133089718  |
| H | 0.83510456    | 1.4611268854  | 1.8572505596  |
| H | 0.8744577567  | 3.0991901407  | 1.1768715945  |
| C | -3.8846769058 | -0.3157711463 | 1.5144894708  |
| H | -3.7227887818 | -1.176973847  | 2.1747132136  |
| H | -3.7265552228 | 0.5949772385  | 2.1019076586  |
| H | -4.9309987516 | -0.3325872068 | 1.1950050492  |



|   |               |               |               |
|---|---------------|---------------|---------------|
| C | -3.1912220882 | -1.6365340021 | -0.521075688  |
| H | -2.9250849045 | -2.5365100262 | 0.0475592868  |
| H | -4.2475906466 | -1.7150626142 | -0.7970012349 |
| H | -2.6078789143 | -1.630379837  | -1.4458029834 |
| H | -2.6078789143 | -1.630379837  | -1.4458029834 |

TS 6-31++G(d,p) 0059

E(UwB97XD) = -1036.74465785 A.U.

First frequency = -1515.0153 cm<sup>-1</sup>

|   |               |               |               |
|---|---------------|---------------|---------------|
| S | -0.166066787  | 1.0610418935  | 0.9258385628  |
| O | 0.1728478181  | 0.7821982866  | 2.324083864   |
| O | -1.2399816023 | 2.0194456307  | 0.6414647425  |
| N | -0.5744323153 | -0.363803903  | 0.2110138036  |
| C | -1.4821046029 | -0.3478591375 | -0.9422881665 |
| H | -1.3347184008 | 0.5806958311  | -1.502390291  |
| H | -1.1749240159 | -1.1674794572 | -1.6035123043 |
| C | -2.9680281095 | -0.5001926505 | -0.5977198138 |
| H | -3.2443938599 | 0.3610169124  | 0.0218928238  |
| C | 0.055524608   | -1.6236591418 | 0.6456778647  |
| H | -0.1838917565 | -2.3446651676 | -0.1395810418 |
| H | -0.4191151075 | -1.9841348197 | 1.5641041469  |
| C | 1.5753514216  | -1.5878341384 | 0.865987905   |
| H | 1.9061081512  | -2.6348485324 | 0.9321240343  |
| H | 1.7906515449  | -1.1355800126 | 1.8389335002  |
| C | 2.3921711718  | -0.8696306568 | -0.1949801527 |
| H | 1.9433916773  | 0.3398522944  | -0.1098257745 |
| C | 3.860729111   | -0.7552820646 | 0.1619154353  |
| H | 4.3382097103  | -1.7448073544 | 0.1415010977  |
| H | 3.995922673   | -0.3413291589 | 1.1663497253  |
| H | 4.3919418481  | -0.115288299  | -0.5495393618 |
| C | 2.1345813834  | -1.2967091763 | -1.625279122  |
| H | 2.4082765817  | -2.3519571097 | -1.7635601557 |
| H | 2.7312368679  | -0.7026962208 | -2.3242693278 |
| H | 1.0828552487  | -1.1864178414 | -1.9041561264 |
| C | 1.3090115552  | 1.5729376946  | 0.0886786532  |
| H | 1.0445537476  | 1.8758652666  | -0.9256710806 |
| C | 2.2357319742  | 2.4882283406  | 0.8434071752  |

|   |               |               |               |
|---|---------------|---------------|---------------|
| H | 3.147523757   | 2.6360546436  | 0.2584298063  |
| H | 2.5085316714  | 2.0582614397  | 1.8101286916  |
| H | 1.7853773644  | 3.4722846491  | 1.0190455216  |
| C | -3.2457572235 | -1.7788603067 | 0.1929821312  |
| H | -2.7227714214 | -1.7769344478 | 1.1535416936  |
| H | -4.3163722551 | -1.8799235786 | 0.3969591962  |
| H | -2.9260117085 | -2.6649784801 | -0.370005033  |
| C | -3.7876168868 | -0.4570517936 | -1.889414015  |
| H | -4.8583447417 | -0.5133004472 | -1.6713166635 |
| H | -3.6060870897 | 0.4667685312  | -2.4490377613 |
| H | -3.5344544309 | -1.3028872059 | -2.5407254543 |
| H | -3.5344544309 | -1.3028872059 | -2.5407254543 |

TS 6-31++G(d,p) 0061

E(UwB97XD) = -1036.74629278 A.U.

First frequency = -1478.6151 cm<sup>-1</sup>

|   |               |               |               |
|---|---------------|---------------|---------------|
| S | -0.2974256454 | 1.1568261875  | 0.413559842   |
| O | -0.27649988   | 0.9707362022  | 1.8693039522  |
| O | -1.2881554996 | 2.0823019694  | -0.1487929698 |
| N | -0.4948097093 | -0.3076279304 | -0.3381230303 |
| C | -1.585499668  | -0.5062264735 | -1.2986083825 |
| H | -1.8797254184 | 0.4730400217  | -1.6817126341 |
| H | -1.1686518145 | -1.0779555873 | -2.1379914665 |
| C | -2.8195205119 | -1.2374167728 | -0.7494988922 |
| H | -2.5110374525 | -2.2439136875 | -0.4364322901 |
| C | 0.0359000235  | -1.5254548112 | 0.2973336     |
| H | -0.0108473954 | -2.2889278333 | -0.4855893899 |
| H | -0.6221029927 | -1.8550426818 | 1.110779913   |
| C | 1.4710381766  | -1.4377389303 | 0.8262980423  |
| H | 1.7925785422  | -2.4690688729 | 1.0311188891  |
| H | 1.4792223891  | -0.9162782347 | 1.7887967571  |
| C | 2.4730092563  | -0.7702882075 | -0.1006910219 |
| H | 2.0052787556  | 0.4268882773  | -0.152241354  |
| C | 3.8504448574  | -0.6252686656 | 0.5135356854  |
| H | 4.501788436   | -0.0112234555 | -0.1162480276 |
| H | 4.3257194915  | -1.6097626492 | 0.6250778187  |
| H | 3.798149322   | -0.1668638429 | 1.5064006855  |

|   |               |               |               |
|---|---------------|---------------|---------------|
| C | 2.4755060286  | -1.2668245557 | -1.5317237235 |
| H | 3.1943297197  | -0.7069828546 | -2.137749901  |
| H | 1.4901033255  | -1.1668980271 | -1.9966976069 |
| H | 2.7610710717  | -2.3274534934 | -1.5680011236 |
| C | 1.3211108189  | 1.649103554   | -0.1057496537 |
| H | 1.2698305951  | 1.9272339802  | -1.1591689078 |
| C | 2.0667552047  | 2.5831601904  | 0.8085824272  |
| H | 3.0799193357  | 2.7257150094  | 0.4229960452  |
| H | 2.1336790548  | 2.1720143689  | 1.8187909169  |
| H | 1.5882210174  | 3.5677255961  | 0.8691511268  |
| C | -3.8421116386 | -1.3934397246 | -1.8778141529 |
| H | -4.7116303675 | -1.9639353276 | -1.5376386657 |
| H | -4.1961169256 | -0.412821463  | -2.217846379  |
| H | -3.4127858348 | -1.915524119  | -2.7397237415 |
| C | -3.4270894471 | -0.5238854781 | 0.4576425772  |
| H | -2.7091652804 | -0.4350994398 | 1.2793207107  |
| H | -3.7520029058 | 0.4869652488  | 0.1876074213  |
| H | -4.2964485042 | -1.0749420923 | 0.8300315108  |
| H | -4.2964485042 | -1.0749420923 | 0.8300315108  |

TS 6-31++G(d,p) 0064

E(UwB97XD) = -1036.74664633 A.U.

First frequency = -1413.8272 cm<sup>-1</sup>

|   |               |               |               |
|---|---------------|---------------|---------------|
| S | -0.0333876021 | 1.3726049293  | -1.0379781893 |
| O | -1.1286877422 | 2.2882104491  | -0.6973398739 |
| O | 0.5032778607  | 1.4262678753  | -2.4047746157 |
| N | -0.5547896204 | -0.1802960227 | -0.6709809396 |
| C | -2.0114524514 | -0.4015222026 | -0.6260229169 |
| H | -2.5074934863 | 0.566661777   | -0.5361749329 |
| H | -2.3343334868 | -0.8515596196 | -1.5757645328 |
| C | -2.446125931  | -1.2881856132 | 0.5474480587  |
| H | -1.8795656658 | -2.2283764466 | 0.5128935305  |
| C | 0.1599494057  | -1.2969670312 | -1.3286627556 |
| H | -0.1543129404 | -1.3698260872 | -2.3785841123 |
| H | -0.2006548255 | -2.1950213025 | -0.82101362   |
| C | 1.6902359891  | -1.2733842943 | -1.2710218676 |
| H | 2.0785179537  | -0.6004058779 | -2.0420714836 |

|   |               |               |               |
|---|---------------|---------------|---------------|
| H | 2.0285219062  | -2.2831266277 | -1.5435979339 |
| C | 2.2963061477  | -0.8803395927 | 0.0654124195  |
| H | 1.8885342562  | 0.3281197006  | 0.1519689371  |
| C | 1.7559076615  | -1.6133849969 | 1.2750037632  |
| H | 2.0336136422  | -2.6758033022 | 1.227758926   |
| H | 0.6659760465  | -1.553500366  | 1.331954463   |
| H | 2.1702564317  | -1.2020154578 | 2.200597383   |
| C | 3.8070140266  | -0.7700239113 | 0.0293008782  |
| H | 4.1941782131  | -0.3487025549 | 0.9623628742  |
| H | 4.1408209878  | -0.138458388  | -0.8002666428 |
| H | 4.2592990714  | -1.7625022071 | -0.1020790723 |
| C | 1.3141231314  | 1.611519498   | 0.0809365319  |
| H | 2.0660720321  | 2.2319103791  | -0.4063765735 |
| C | 0.9514523151  | 1.9653471315  | 1.4973975349  |
| H | 0.2515988119  | 1.2407395192  | 1.9201965361  |
| H | 0.496735886   | 2.9591112674  | 1.5622592976  |
| H | 1.8581185671  | 1.9622779824  | 2.1085506471  |
| C | -3.9296883411 | -1.6302746963 | 0.3874452668  |
| H | -4.2681024325 | -2.2768040753 | 1.2027151832  |
| H | -4.5413058136 | -0.7201979291 | 0.4053074875  |
| H | -4.1221408377 | -2.1484574455 | -0.5577596051 |
| C | -2.1776481214 | -0.6134003798 | 1.8916603107  |
| H | -2.732061902  | 0.3295947675  | 1.9688352991  |
| H | -2.4869733235 | -1.2586486425 | 2.7198978907  |
| H | -1.1151869352 | -0.3908240562 | 2.0163890704  |
| H | -1.1151869352 | -0.3908240562 | 2.0163890704  |

TS 6-31++G(d,p) 0065

E(UwB97XD) = -1036.74588972 A.U.

First frequency = -1415.1478 cm<sup>-1</sup>

|   |               |               |               |
|---|---------------|---------------|---------------|
| S | -0.0521749411 | 1.3891538074  | -0.354116491  |
| O | -1.1505683294 | 2.181129758   | 0.2123010688  |
| O | 0.5293443117  | 1.8487506351  | -1.6224671682 |
| N | -0.6096145098 | -0.1814257208 | -0.473760559  |
| C | -2.0782319534 | -0.3481457227 | -0.4329371889 |
| H | -2.5749025996 | 0.5179842388  | -0.8800465986 |
| H | -2.311257135  | -1.2086337765 | -1.0698615323 |

|   |               |               |               |
|---|---------------|---------------|---------------|
| C | -2.6280796604 | -0.5964974905 | 0.9735382678  |
| H | -2.3000019289 | 0.2370623391  | 1.6060771174  |
| C | 0.0770399071  | -1.1215705899 | -1.3896886718 |
| H | -0.3285682845 | -1.0095516903 | -2.4039077509 |
| H | -0.209049514  | -2.1152847972 | -1.0312849094 |
| C | 1.6039902536  | -1.038885113  | -1.4770069106 |
| H | 1.8911692225  | -0.1717527281 | -2.0780067134 |
| H | 1.9209606256  | -1.9270241859 | -2.0428653658 |
| C | 2.3630632715  | -0.9952563385 | -0.1608703722 |
| H | 1.9168842715  | 0.0872511951  | 0.359098938   |
| C | 2.0354074555  | -2.099282135  | 0.8217775707  |
| H | 2.3529226429  | -3.0713985831 | 0.419378463   |
| H | 0.9632812763  | -2.1574580004 | 1.0247853546  |
| H | 2.5536915247  | -1.9461137002 | 1.7732416394  |
| C | 3.8472767168  | -0.7462267008 | -0.3384324037 |
| H | 4.0312486735  | 0.1344061184  | -0.9620131797 |
| H | 4.3236059811  | -1.6079570424 | -0.8258695218 |
| H | 4.3402477595  | -0.5955557332 | 0.6270778856  |
| C | 1.2557476484  | 1.2403398705  | 0.8203402087  |
| H | 1.9612324016  | 2.0582533613  | 0.673668597   |
| C | 0.8362089898  | 0.9373651855  | 2.2331131536  |
| H | 1.7242464085  | 0.7276169188  | 2.835392563   |
| H | 0.1835696618  | 0.0602753183  | 2.267407781   |
| H | 0.3053961695  | 1.7806603273  | 2.6874349864  |
| C | -2.0942889318 | -1.9016332772 | 1.5618605225  |
| H | -1.001192313  | -1.9033964414 | 1.5916900696  |
| H | -2.4580478305 | -2.0484569923 | 2.5836655166  |
| H | -2.4182927505 | -2.7603797949 | 0.9607474753  |
| C | -4.1575049135 | -0.5944843021 | 0.9288936813  |
| H | -4.5444298338 | 0.3583129701  | 0.5528508593  |
| H | -4.5296655895 | -1.3932005798 | 0.2753874175  |
| H | -4.5752819109 | -0.7588187873 | 1.9268656855  |
| H | -4.5752819109 | -0.7588187873 | 1.9268656855  |

TS 6-31++G(d,p) 0068

E(UwB97XD) = -1036.74050994 A.U.

First frequency = -1405.3582 cm<sup>-1</sup>

|   |               |               |               |
|---|---------------|---------------|---------------|
| S | -0.100724124  | 1.1742614129  | 0.2549433887  |
| O | 0.3251778864  | 1.1202741513  | 1.6638991299  |
| O | -1.1042567006 | 2.2032298301  | -0.0527122247 |
| N | -0.7263449311 | -0.2833743658 | -0.2663279008 |
| C | -1.9503940981 | -0.6741239627 | 0.4576724071  |
| H | -1.6999056859 | -1.4262166679 | 1.2181110769  |
| H | -2.3420255627 | 0.200192897   | 0.9872584924  |
| C | -3.0416008021 | -1.2003282989 | -0.4813626346 |
| H | -2.6282953162 | -2.0397321613 | -1.0566409656 |
| C | 0.1772108842  | -1.3985603396 | -0.6168198628 |
| H | 0.5894114362  | -1.214002476  | -1.6141275853 |
| H | -0.4796257706 | -2.2639488144 | -0.7184802504 |
| C | 1.3091347604  | -1.7173643836 | 0.3743334802  |
| H | 1.5610989242  | -2.781671441  | 0.2752769613  |
| H | 0.9458708244  | -1.5681009974 | 1.3964564743  |
| C | 2.5682828307  | -0.889527355  | 0.1256494232  |
| H | 2.0783932902  | 0.2102692777  | -0.3061383458 |
| C | 3.3550271123  | -0.5370349123 | 1.3692430078  |
| H | 4.201861379   | 0.1146735994  | 1.1313670412  |
| H | 3.7563005891  | -1.4479070783 | 1.8352564551  |
| H | 2.7182816166  | -0.0327136726 | 2.1015520141  |
| C | 3.4171886147  | -1.3857510742 | -1.029507929  |
| H | 3.8988582612  | -2.335740146  | -0.7610195026 |
| H | 4.2058598554  | -0.6680748997 | -1.2757454212 |
| H | 2.8221507961  | -1.5599294852 | -1.9319490936 |
| C | 1.3427365644  | 1.3392685044  | -0.7383767278 |
| H | 1.1039410437  | 1.1838172889  | -1.7904827757 |
| C | 2.1914709795  | 2.5398138253  | -0.4073653178 |
| H | 3.1186842237  | 2.4844216468  | -0.9832299476 |
| H | 2.445001336   | 2.5604574284  | 0.6554407017  |
| H | 1.688910705   | 3.4787108406  | -0.6650147354 |
| C | -3.4969016269 | -0.1220630626 | -1.4636748028 |
| H | -2.6522464162 | 0.268761277   | -2.0373898737 |
| H | -4.2362652751 | -0.5238258596 | -2.1637130657 |
| H | -3.956345364  | 0.716816523   | -0.9277550414 |
| C | -4.2106833086 | -1.7312842797 | 0.351389069   |
| H | -3.8913933689 | -2.5304335712 | 1.0286440946  |
| H | -4.6513288484 | -0.9299663305 | 0.9565706155  |

H -4.996574779 -2.1309662608 -0.2965614532  
H -4.996574779 -2.1309662608 -0.2965614532

TS 6-31++G(d,p) 0069

E(UwB97XD) = -1036.74418391 A.U.

First frequency = -1461.1820  $\text{cm}^{-1}$

S -0.1274725755 1.3129248968 0.224994236  
O 0.401682019 1.8118285021 1.5015671605  
O -1.172891844 2.1146565389 -0.4232785981  
N -0.7261500681 -0.2373695212 0.3798412761  
C -2.1918556591 -0.3857442224 0.2583817085  
H -2.4508082456 -1.2803513466 0.8348331985  
H -2.7103028024 0.4544664555 0.732486164  
C -2.6875976619 -0.5635780411 -1.1797627826  
H -2.4494065771 0.3529372253 -1.7307713486  
C -0.1095478077 -1.1305803087 1.3877890923  
H -0.4340806692 -2.1351819027 1.1017577422  
H -0.5294961528 -0.9195093763 2.3801783353  
C 1.4183154624 -1.1108921668 1.4936663602  
H 1.6903589032 -1.9666549925 2.1284897726  
H 1.7397825207 -0.2143378183 2.0311622686  
C 2.1833875262 -1.1988186121 0.1834069459  
H 1.7727950674 -0.1400428732 -0.419532683  
C 3.6751944369 -0.9894911379 0.3494200414  
H 4.17692373 -0.9321904812 -0.6216345088  
H 4.1186038639 -1.8274085896 0.9050547155  
H 3.8908912009 -0.0710373351 0.9046662795  
C 1.8208797837 -2.366422478 -0.7095013248  
H 0.7451099386 -2.4220619442 -0.8925993936  
H 2.1308104797 -3.3104531525 -0.2397572324  
H 2.3282865517 -2.29364797 -1.6764205967  
C 1.2220914019 1.0646020272 -0.8868988866  
H 0.8158641137 0.7803880802 -1.8583129491  
C 2.2961389788 2.1185953628 -0.8769558173  
H 1.9298841113 3.0802322272 -1.2550653049  
H 3.1180289081 1.7960623029 -1.5216980622  
H 2.6859531088 2.2722717434 0.1322767743

|   |               |               |               |
|---|---------------|---------------|---------------|
| C | -4.2084559579 | -0.7340923976 | -1.1633935915 |
| H | -4.7017770853 | 0.1160017041  | -0.6802940749 |
| H | -4.600137405  | -0.8161189085 | -2.1818373325 |
| H | -4.4936691115 | -1.6441467463 | -0.6209970857 |
| C | -2.0020700535 | -1.7397599982 | -1.8732865149 |
| H | -0.9235605054 | -1.5763047678 | -1.9446163759 |
| H | -2.1712260082 | -2.6735849814 | -1.3218856487 |
| H | -2.3920820417 | -1.8726665853 | -2.8874384655 |
| H | -2.3920820417 | -1.8726665853 | -2.8874384655 |

TS 6-31++G(d,p) 0079

E(UwB97XD) = -1036.74710429 A.U.

First frequency = -1479.2511 cm<sup>-1</sup>

|   |               |               |               |
|---|---------------|---------------|---------------|
| S | -0.2407419058 | 1.3029400359  | 0.8688929233  |
| O | 0.3796436817  | 1.3932717691  | 2.1969140009  |
| O | -1.4010981466 | 2.1620296415  | 0.6009716377  |
| N | -0.6932285776 | -0.2665755173 | 0.5402918536  |
| C | -2.1223904204 | -0.5771601109 | 0.3897538672  |
| H | -2.4359268664 | -1.2001612017 | 1.2381893116  |
| H | -2.6934981647 | 0.3521866424  | 0.4388782916  |
| C | -2.4282439415 | -1.2863128433 | -0.9345292226 |
| H | -1.7835060134 | -2.173125494  | -1.0101440027 |
| C | 0.0957396862  | -1.3589044215 | 1.1436963796  |
| H | -0.2418130396 | -2.2634988308 | 0.6304370976  |
| H | -0.1679579236 | -1.4690996982 | 2.2039345708  |
| C | 1.6179190279  | -1.249905955  | 1.015497864   |
| H | 2.0265119054  | -2.2361507309 | 1.2782013685  |
| H | 2.001330022   | -0.5487377052 | 1.7634927709  |
| C | 2.1364187199  | -0.836201249  | -0.3517724324 |
| H | 1.6318880794  | 0.3419469569  | -0.4560257302 |
| C | 3.6355362378  | -0.6169665744 | -0.3809333104 |
| H | 4.1638657251  | -1.5723533442 | -0.2565268549 |
| H | 3.9582527775  | 0.0488523242  | 0.4259543769  |
| H | 3.9530276082  | -0.1832410044 | -1.3343860964 |
| C | 1.6033142477  | -1.6311530857 | -1.5251376432 |
| H | 1.9466776706  | -2.6734046477 | -1.4639627663 |
| H | 1.9610408152  | -1.2175221006 | -2.4730520039 |



|   |               |               |               |
|---|---------------|---------------|---------------|
| H | 0.5104589375  | -1.6381068635 | -1.5488427415 |
| C | 1.0038061553  | 1.5937489147  | -0.3539923975 |
| H | 0.5133299162  | 1.6918153257  | -1.3228974014 |
| C | 2.0464836835  | 2.624548874   | -0.0152327585 |
| H | 1.6205232275  | 3.6324180081  | 0.0523213646  |
| H | 2.8059802348  | 2.633410437   | -0.8016829324 |
| H | 2.5329360934  | 2.3935319008  | 0.9355210676  |
| C | -2.1410104507 | -0.3759102255 | -2.1282904653 |
| H | -2.7940276049 | 0.5046580945  | -2.1068529392 |
| H | -1.1039068107 | -0.0276808418 | -2.1200942985 |
| H | -2.3129373348 | -0.9036233469 | -3.0716857739 |
| C | -3.882948425  | -1.7609599042 | -0.9328217814 |
| H | -4.0797625571 | -2.4460690669 | -0.1015358822 |
| H | -4.5680480849 | -0.9097750133 | -0.8394471254 |
| H | -4.1224596876 | -2.2822933156 | -1.8645737648 |
| H | -4.1224596876 | -2.2822933156 | -1.8645737648 |

TS 6-31++G(d,p) 0081

E(UwB97XD) = -1036.74282345 A.U.

First frequency = -1427.9908  $\text{cm}^{-1}$

|   |               |               |               |
|---|---------------|---------------|---------------|
| S | 0.0672619516  | 1.0084948521  | -0.8475309202 |
| O | -0.9518609629 | 2.0632669139  | -0.7964032312 |
| O | 0.5681339247  | 0.6123808885  | -2.1668452279 |
| N | -0.5944411654 | -0.3060767472 | -0.092279517  |
| C | -1.8426521552 | -0.1238924214 | 0.6663762235  |
| H | -1.7925057659 | -0.8075897525 | 1.5231329693  |
| H | -1.8893941463 | 0.8916129187  | 1.0679609363  |
| C | -3.1085194078 | -0.4095193109 | -0.1486288108 |
| H | -3.1329651926 | 0.3167167762  | -0.9703751166 |
| C | 0.1946124141  | -1.4987417669 | 0.2870273926  |
| H | -0.4808978682 | -2.3491042092 | 0.1626531395  |
| H | 0.4296062758  | -1.434182753  | 1.3589987316  |
| C | 1.4735646543  | -1.783017454  | -0.5022057562 |
| H | 1.2702388266  | -1.69514244   | -1.5723973419 |
| H | 1.7247721079  | -2.8356328941 | -0.3106820271 |
| C | 2.6846586041  | -0.9335154374 | -0.1242023089 |
| H | 2.2032716384  | 0.2496150339  | -0.0007055215 |

|   |               |               |               |
|---|---------------|---------------|---------------|
| C | 3.2751097346  | -1.2401509148 | 1.2391467957  |
| H | 4.0490754635  | -0.5127322729 | 1.5028057138  |
| H | 3.7390102049  | -2.2360846953 | 1.2338039262  |
| H | 2.5203029277  | -1.23040078   | 2.0314563732  |
| C | 3.7132208624  | -0.8217157364 | -1.229642717  |
| H | 4.5330513322  | -0.1555527188 | -0.9429708632 |
| H | 3.2570326724  | -0.4408618395 | -2.1481503057 |
| H | 4.1454297541  | -1.8079881784 | -1.4489156079 |
| C | 1.4797183429  | 1.4512120733  | 0.1118648565  |
| H | 2.0798253403  | 2.1713980643  | -0.444958677  |
| C | 1.234664048   | 1.7425032167  | 1.5677228475  |
| H | 2.1927997614  | 1.8725108608  | 2.0773697495  |
| H | 0.7001090875  | 0.9228591944  | 2.0577060107  |
| H | 0.6504198755  | 2.6595775943  | 1.7037493856  |
| C | -4.3380784559 | -0.1853518751 | 0.7339179911  |
| H | -4.346662464  | -0.8882288475 | 1.5762686805  |
| H | -4.3587213657 | 0.8310776001  | 1.1412566459  |
| H | -5.2588918302 | -0.338258627  | 0.1628525076  |
| C | -3.1010043443 | -1.816164678  | -0.746958776  |
| H | -4.0063521208 | -1.989440777  | -1.3371935482 |
| H | -2.2385622732 | -1.9617128071 | -1.4047710539 |
| H | -3.0654332372 | -2.5765090218 | 0.0436902797  |
| H | -3.0654332372 | -2.5765090218 | 0.0436902797  |

TS 6-31++G(d,p) 0082

E(UwB97XD) = -1036.74021243 A.U.

First frequency = -1420.0817 cm<sup>-1</sup>

|   |               |               |               |
|---|---------------|---------------|---------------|
| S | -0.1505121748 | 1.1067786477  | 0.2145550864  |
| O | 0.1959165066  | 1.011138943   | 1.6361004982  |
| O | -1.1181239264 | 2.1422467074  | -0.166424968  |
| N | -0.7707839154 | -0.355332473  | -0.2832001175 |
| C | -1.9146560179 | -0.3509706473 | -1.2152619386 |
| H | -2.041951304  | 0.6532376198  | -1.6237134609 |
| H | -1.6600050311 | -1.0146425952 | -2.0507916092 |
| C | -3.2368661046 | -0.8015459854 | -0.5753369065 |
| H | -3.9658005091 | -0.7900440258 | -1.3978111167 |
| C | 0.1214566992  | -1.5280852154 | -0.4393192406 |

|   |               |               |               |
|---|---------------|---------------|---------------|
| H | 0.5508469069  | -1.5182630391 | -1.4524966771 |
| H | -0.5385478878 | -2.3945312021 | -0.3863373431 |
| C | 1.2369021442  | -1.6992888453 | 0.5964122965  |
| H | 1.4876632298  | -2.7683690024 | 0.6211383124  |
| H | 0.8565020965  | -1.4375939898 | 1.587219748   |
| C | 2.5123296088  | -0.9169339293 | 0.2879363694  |
| H | 2.0562570351  | 0.1725131966  | -0.2083128329 |
| C | 3.3051047855  | -0.5114491841 | 1.5117029926  |
| H | 4.1696642522  | 0.102235058   | 1.2389313689  |
| H | 3.6808782512  | -1.4027771711 | 2.0336237622  |
| H | 2.6805519404  | 0.0520036139  | 2.2108247905  |
| C | 3.3541756082  | -1.506503344  | -0.8276699282 |
| H | 4.1632388358  | -0.8261354401 | -1.1111122399 |
| H | 2.76164778    | -1.7200174336 | -1.723029117  |
| H | 3.8094651848  | -2.4501878522 | -0.4973650139 |
| C | 1.3616348525  | 1.3047974793  | -0.674429614  |
| H | 1.1901491822  | 1.1389715818  | -1.7391449682 |
| C | 2.1932810529  | 2.503075493   | -0.2981128825 |
| H | 1.7030590047  | 3.4424072926  | -0.5777713151 |
| H | 3.1507490411  | 2.4525590286  | -0.8234287156 |
| H | 2.3897219866  | 2.5210124259  | 0.7768572646  |
| C | -3.7142980195 | 0.1777224846  | 0.497742387   |
| H | -3.8064231171 | 1.1926503271  | 0.1006256485  |
| H | -4.6880187196 | -0.1305135803 | 0.8920259729  |
| H | -3.0066286644 | 0.2086110125  | 1.3336432613  |
| C | -3.1742875692 | -2.2265183386 | -0.021308329  |
| H | -4.1594413657 | -2.5401722342 | 0.338048881   |
| H | -2.8512406009 | -2.9442531178 | -0.7836057001 |
| H | -2.4810857457 | -2.2838173783 | 0.8256934935  |
| H | -2.4810857457 | -2.2838173783 | 0.8256934935  |

TS 6-31++G(d,p) 0089

E(UwB97XD) = -1036.73838142 A.U.

First frequency = -1407.5751  $\text{cm}^{-1}$

|   |               |              |              |
|---|---------------|--------------|--------------|
| S | -0.1620112313 | 1.097882556  | 0.4453917979 |
| O | 0.4051749198  | 0.9491174974 | 1.7968518639 |
| O | -1.2090425863 | 2.1206389062 | 0.3213107181 |

|   |               |               |               |
|---|---------------|---------------|---------------|
| N | -0.8046974965 | -0.3358682388 | -0.1229642306 |
| C | -1.9751879955 | -0.7919340526 | 0.6585855246  |
| H | -1.7069591686 | -1.7221285882 | 1.1745367916  |
| H | -2.1934701974 | -0.0555614308 | 1.4375599495  |
| C | -3.2434594547 | -0.9917366213 | -0.1847186257 |
| H | -3.99755053   | -1.3533105242 | 0.5282240384  |
| C | 0.102332239   | -1.3993739807 | -0.6104635248 |
| H | 0.4104904201  | -1.1506914908 | -1.6316053483 |
| H | -0.5279196971 | -2.2837544058 | -0.693003017  |
| C | 1.3339424238  | -1.7265802071 | 0.2510744517  |
| H | 1.6047301369  | -2.7751110498 | 0.0680992023  |
| H | 1.0662615149  | -1.6445778345 | 1.3093517867  |
| C | 2.5412467573  | -0.8473563137 | -0.0677729954 |
| H | 1.9828179981  | 0.2571815233  | -0.3850224457 |
| C | 3.4347437828  | -0.5400742788 | 1.1141930637  |
| H | 3.9006742503  | -1.4626730758 | 1.4878734757  |
| H | 2.8582654758  | -0.0953528221 | 1.9302405837  |
| H | 4.2389143832  | 0.1483439735  | 0.8351190478  |
| C | 3.2876012219  | -1.253072702  | -1.3246464619 |
| H | 4.0294804749  | -0.4984388742 | -1.603669749  |
| H | 2.6130857778  | -1.3974107204 | -2.1749475629 |
| H | 3.8181115081  | -2.2003195331 | -1.1573576281 |
| C | 1.1706747779  | 1.3800501997  | -0.6696108025 |
| H | 0.8350389712  | 1.2797210403  | -1.7017452013 |
| C | 2.0076271306  | 2.5904158853  | -0.3440715414 |
| H | 2.3644744568  | 2.5557133173  | 0.6883240871  |
| H | 1.4511343616  | 3.5228924075  | -0.4899460585 |
| H | 2.8749194857  | 2.6076112271  | -1.0088941807 |
| C | -3.0872745039 | -2.054922397  | -1.2745915194 |
| H | -4.0465966699 | -2.2294216118 | -1.7716858444 |
| H | -2.3740263485 | -1.7311932579 | -2.0409683785 |
| H | -2.7451376704 | -3.0117167615 | -0.8646504744 |
| C | -3.7404044305 | 0.3265136093  | -0.7785344152 |
| H | -4.6699401713 | 0.1695545133  | -1.3352303959 |
| H | -3.9259242662 | 1.0708841424  | 0.0012618444  |
| H | -2.994438492  | 0.7434512195  | -1.462612017  |
| H | -2.994438492  | 0.7434512195  | -1.462612017  |

TS 6-311++G(d,p) 0003

E(UwB97XD) = -1036.89724316 A.U.

First frequency = -1515.0694 cm<sup>-1</sup>

|   |               |               |               |
|---|---------------|---------------|---------------|
| S | -0.1109804753 | 1.4343778104  | 0.6142091209  |
| O | 0.443834482   | 1.4734291108  | 1.9623626322  |
| O | -1.131853048  | 2.4148170099  | 0.257134946   |
| N | -0.7871558557 | -0.0681627971 | 0.4086071765  |
| C | -1.5083943459 | -0.2871274879 | -0.8532302931 |
| H | -1.9798270572 | 0.6587257887  | -1.1268361121 |
| H | -0.814490902  | -0.5590515331 | -1.6603294265 |
| C | -2.5978598295 | -1.3562476562 | -0.737103247  |
| H | -2.123565525  | -2.3188529069 | -0.5123300657 |
| C | -0.0661230641 | -1.2171823881 | 0.9786653691  |
| H | -0.8198082339 | -1.9685931303 | 1.2227077377  |
| H | 0.3625596522  | -0.895686911  | 1.9271661463  |
| C | 1.0006728165  | -1.8401106101 | 0.0721804505  |
| H | 0.5450850204  | -2.1349961051 | -0.8783438522 |
| H | 1.3283738096  | -2.7729269394 | 0.5513728187  |
| C | 2.2221622818  | -0.9718535759 | -0.1895390321 |
| H | 1.7479697426  | 0.2134503449  | -0.4141199654 |
| C | 3.1198406785  | -0.7703014655 | 1.0141584374  |
| H | 3.9284357403  | -0.0706931374 | 0.7864262248  |
| H | 3.5761083162  | -1.7236264786 | 1.3098006915  |
| H | 2.5691863968  | -0.3782261521 | 1.8726783045  |
| C | 2.9639592357  | -1.3255979766 | -1.4601253844 |
| H | 2.2949346337  | -1.3222887173 | -2.3253998268 |
| H | 3.4009267458  | -2.3294452555 | -1.3802773403 |
| H | 3.7801744668  | -0.6236158298 | -1.6512178803 |
| C | 1.2259224647  | 1.5088005283  | -0.5387590831 |
| H | 0.8210361773  | 1.5324680594  | -1.5499321037 |
| C | 2.3250743346  | 2.4884271062  | -0.2316268282 |
| H | 1.9848614191  | 3.5247950997  | -0.326936717  |
| H | 3.1461497584  | 2.339238753   | -0.9364369602 |
| H | 2.7061104076  | 2.3427022855  | 0.7805773679  |
| C | -3.297147598  | -1.492754594  | -2.0898966555 |
| H | -4.0514157756 | -2.2827575115 | -2.0557063343 |
| H | -3.8007451705 | -0.5590549599 | -2.3619654225 |

|   |               |               |               |
|---|---------------|---------------|---------------|
| H | -2.5870927755 | -1.7386674426 | -2.8848504289 |
| C | -3.5902819968 | -1.0265311173 | 0.3749850603  |
| H | -4.3618740154 | -1.7978910542 | 0.4438527778  |
| H | -3.0944799377 | -0.9483340165 | 1.3451569541  |
| H | -4.08375702   | -0.0693835767 | 0.1750009266  |
| H | -4.08375702   | -0.0693835767 | 0.1750009266  |

TS 6-311++G(d,p) 0023

E(UwB97XD) = -1036.89639366 A.U.

First frequency = -1506.6817  $\text{cm}^{-1}$

|   |               |               |               |
|---|---------------|---------------|---------------|
| S | -0.1350977719 | 1.384679524   | 0.6935591243  |
| O | 0.7225117068  | 1.6255779118  | 1.8519519476  |
| O | -1.2629391391 | 2.2870721811  | 0.4744682988  |
| N | -0.7374687226 | -0.1462525357 | 0.787133363   |
| C | -2.1517485026 | -0.4335538893 | 0.545135067   |
| H | -2.5849982458 | -0.8254208134 | 1.4733568408  |
| H | -2.6531703046 | 0.5105921955  | 0.3283151495  |
| C | -2.4091077665 | -1.4205986997 | -0.5981493716 |
| H | -1.9207632646 | -2.3713119174 | -0.350680493  |
| C | 0.1197787597  | -1.2115862172 | 1.3182831284  |
| H | -0.5484333026 | -1.9446895373 | 1.7760373446  |
| H | 0.7337660143  | -0.8038842513 | 2.1238235595  |
| C | 0.9939932059  | -1.904943082  | 0.2682268482  |
| H | 0.3536174279  | -2.2972633825 | -0.5262363903 |
| H | 1.4627114517  | -2.7752622331 | 0.7493677634  |
| C | 2.0880826315  | -1.0399008902 | -0.3384287224 |
| H | 1.5134232352  | 0.0952701686  | -0.5811422562 |
| C | 3.2081258653  | -0.676663188  | 0.6148971761  |
| H | 2.8324011611  | -0.2003387576 | 1.523761495   |
| H | 3.9151044617  | 0.0113650154  | 0.1437472454  |
| H | 3.7629808774  | -1.5771407051 | 0.9078001809  |
| C | 2.5618089269  | -1.5172034594 | -1.6940257104 |
| H | 3.2853778416  | -0.8220553236 | -2.1283915645 |
| H | 1.7264888419  | -1.6271802884 | -2.3917020097 |
| H | 3.0520977656  | -2.49538541   | -1.6053982745 |
| C | 0.9058185513  | 1.349580848   | -0.7304790128 |
| H | 0.2814816164  | 1.2367515539  | -1.6152265987 |

|   |               |               |               |
|---|---------------|---------------|---------------|
| C | 1.9908499376  | 2.3882052638  | -0.7982754546 |
| H | 1.5825309257  | 3.3965356732  | -0.9236354509 |
| H | 2.6333535111  | 2.1790307878  | -1.6567117029 |
| H | 2.6026632824  | 2.3743652048  | 0.1051897815  |
| C | -1.8468682617 | -0.914181154  | -1.9239206708 |
| H | -2.0710889225 | -1.6142230457 | -2.7330590551 |
| H | -2.2854936904 | 0.0554968775  | -2.1841712756 |
| H | -0.7621349043 | -0.7929707158 | -1.8797411932 |
| C | -3.9127411917 | -1.6798633375 | -0.6961571595 |
| H | -4.4482103294 | -0.7588078501 | -0.9507080011 |
| H | -4.1297040753 | -2.4186713587 | -1.471640634  |
| H | -4.3162857899 | -2.0541909451 | 0.2490864674  |
| H | -4.3162857899 | -2.0541909451 | 0.2490864674  |

TS 6-311++G(d,p) 0025

E(UwB97XD) = -1036.89584199 A.U.

First frequency = -1463.4222 cm<sup>-1</sup>

|   |               |               |               |
|---|---------------|---------------|---------------|
| S | 0.0544237187  | 1.5110667337  | -0.5900854986 |
| O | -0.9886367786 | 2.4401256698  | -0.1619312375 |
| O | 0.7161721036  | 1.7710713817  | -1.8687504142 |
| N | -0.6145682755 | -0.0107138744 | -0.581725913  |
| C | -2.0748393141 | -0.1552697379 | -0.573550116  |
| H | -2.5046995556 | 0.7723944076  | -0.1944006915 |
| H | -2.4367451273 | -0.2936524645 | -1.6008057223 |
| C | -2.5483222096 | -1.3202639448 | 0.3011090013  |
| H | -2.087954401  | -2.2449132134 | -0.0690307549 |
| C | 0.1492772889  | -1.0716309377 | -1.2595277512 |
| H | 0.7319873244  | -0.6413773829 | -2.0781822288 |
| H | -0.5788378051 | -1.7408742903 | -1.7209861435 |
| C | 1.0444529786  | -1.8639544946 | -0.3063129749 |
| H | 1.3934353858  | -2.7626574096 | -0.8336526435 |
| H | 0.4367379281  | -2.2078002915 | 0.5354208559  |
| C | 2.2556015803  | -1.0979519771 | 0.2034419063  |
| H | 1.823402897   | 0.0979225324  | 0.4119866078  |
| C | 2.759899475   | -1.5649418616 | 1.5510640737  |
| H | 3.1469779149  | -2.5896780544 | 1.4784256488  |
| H | 1.9602663079  | -1.5646108789 | 2.2971421154  |

|   |               |               |               |
|---|---------------|---------------|---------------|
| H | 3.5724361353  | -0.9292307583 | 1.9135014623  |
| C | 3.347410239   | -0.8926283928 | -0.8268636792 |
| H | 4.1254675652  | -0.2259580815 | -0.445448601  |
| H | 2.9595512664  | -0.4604131638 | -1.7528331394 |
| H | 3.8189641596  | -1.8517723482 | -1.0748097667 |
| C | 1.3224300626  | 1.3933842174  | 0.6281061315  |
| H | 2.1416380913  | 2.0507799728  | 0.3434733643  |
| C | 0.8733425561  | 1.4401740117  | 2.0613630306  |
| H | 1.7204134767  | 1.2132848671  | 2.7125498621  |
| H | 0.0877953674  | 0.7074412961  | 2.2539305239  |
| H | 0.4922299591  | 2.4295353333  | 2.3302673638  |
| C | -4.0638029131 | -1.4620691569 | 0.1557964863  |
| H | -4.3531289609 | -1.6179341375 | -0.8874123115 |
| H | -4.4309126575 | -2.3106277177 | 0.7384829245  |
| H | -4.5729459035 | -0.561950903  | 0.5168975618  |
| C | -2.1468788396 | -1.1347810087 | 1.7618953919  |
| H | -2.5189181939 | -1.9612430894 | 2.3733218642  |
| H | -1.0614802639 | -1.0954400685 | 1.8731651394  |
| H | -2.5620341708 | -0.2031731749 | 2.1618188446  |
| H | -2.5620341708 | -0.2031731749 | 2.1618188446  |

TS 6-311++G(d,p) 0035

E(UwB97XD) = -1036.89667485 A.U.

First frequency = -1485.8178 cm<sup>-1</sup>

|   |               |               |               |
|---|---------------|---------------|---------------|
| S | 0.1006644924  | 1.1498840885  | -1.0097861109 |
| O | -0.9101643096 | 2.1874723437  | -0.8284534903 |
| O | 0.6107309115  | 0.8863586788  | -2.3513021134 |
| N | -0.5616061447 | -0.2510218276 | -0.4501519844 |
| C | -1.5816408766 | -0.1994252489 | 0.6056841991  |
| H | -1.3989594181 | -1.0468235872 | 1.2762407103  |
| H | -1.4552126426 | 0.7058887226  | 1.2027684344  |
| C | -3.0184313851 | -0.2493645294 | 0.0783541174  |
| H | -3.1576966416 | 0.6385372388  | -0.5475346504 |
| C | 0.1425129456  | -1.5178125411 | -0.6836392519 |
| H | 0.5164673654  | -1.515221841  | -1.7080557492 |
| H | -0.6149924211 | -2.3012290496 | -0.6332322462 |
| C | 1.2615744967  | -1.8241710921 | 0.3167998038  |



|   |               |               |               |
|---|---------------|---------------|---------------|
| H | 1.5260924119  | -2.8855352786 | 0.2084087251  |
| H | 0.8687131141  | -1.7091616722 | 1.3331440064  |
| C | 2.5266353887  | -0.9942875273 | 0.1606446491  |
| H | 2.1040171064  | 0.2216686465  | 0.0557549731  |
| C | 3.4011001836  | -0.9847662539 | 1.3961241321  |
| H | 4.2417879382  | -0.2952444457 | 1.2806756208  |
| H | 3.8145081557  | -1.98541161   | 1.5775684502  |
| H | 2.8352114963  | -0.6938298895 | 2.2855537217  |
| C | 3.2889950787  | -1.2282877448 | -1.1272777038 |
| H | 2.6611033289  | -1.0829234682 | -2.0090513969 |
| H | 3.6813170904  | -2.2529703418 | -1.1539256424 |
| H | 4.1376960507  | -0.543794154  | -1.2055680081 |
| C | 1.5061185621  | 1.488269526   | 0.0060121862  |
| H | 2.2009928186  | 2.1140496263  | -0.5510790267 |
| C | 1.2346181785  | 1.8687167545  | 1.4361187993  |
| H | 0.7194193559  | 1.0677050204  | 1.9728363528  |
| H | 0.6278189802  | 2.7762899389  | 1.5082261883  |
| H | 2.1833107073  | 2.0519214944  | 1.9442821993  |
| C | -3.9879712106 | -0.1726957271 | 1.2573403066  |
| H | -3.8708759936 | -1.0414553169 | 1.9150450191  |
| H | -3.8211489436 | 0.7282819125  | 1.8550726039  |
| H | -5.0233144328 | -0.1574059429 | 0.9074956561  |
| C | -3.2790730535 | -1.4886327755 | -0.7745501013 |
| H | -2.6171101939 | -1.5208100303 | -1.6435059808 |
| H | -3.1265646215 | -2.403707942  | -0.1903398745 |
| H | -4.3096473736 | -1.4939227848 | -1.1394705368 |
| H | -4.3096473736 | -1.4939227848 | -1.1394705368 |

TS 6-311++G(d,p) 0036

E(UwB97XD) = -1036.89469504 A.U.

First frequency = -1431.0943 cm<sup>-1</sup>

|   |               |               |               |
|---|---------------|---------------|---------------|
| S | -0.0353268002 | 1.4141482949  | -0.3320911407 |
| O | -1.1244861997 | 2.2460307771  | 0.174193028   |
| O | 0.669611742   | 1.8685430849  | -1.5301857975 |
| N | -0.6619552261 | -0.1057455946 | -0.5729041229 |
| C | -2.1272933314 | -0.2547805405 | -0.5240152537 |
| H | -2.608507309  | 0.6589170368  | -0.8782964924 |

|   |               |               |               |
|---|---------------|---------------|---------------|
| H | -2.388208686  | -1.0451334759 | -1.2333250565 |
| C | -2.6709732605 | -0.6133644248 | 0.8601242337  |
| H | -2.3421105708 | 0.1690259368  | 1.5532471709  |
| C | 0.1356093874  | -1.03868421   | -1.3898226459 |
| H | 0.5851231791  | -0.503186692  | -2.2309983154 |
| H | -0.5693854167 | -1.7526952319 | -1.8148932801 |
| C | 1.198993892   | -1.8124079274 | -0.6074135901 |
| H | 1.5680822565  | -2.6153575226 | -1.2615147146 |
| H | 0.7186351246  | -2.3020204778 | 0.2443242482  |
| C | 2.3929935601  | -1.0034082774 | -0.1259139749 |
| H | 1.8728067232  | 0.0537188305  | 0.3851744278  |
| C | 3.1410071158  | -1.6506084018 | 1.0196183723  |
| H | 3.6171648385  | -2.5817422957 | 0.6857795116  |
| H | 2.4686889089  | -1.89947989   | 1.845476325   |
| H | 3.9283021627  | -0.993921248  | 1.3997454004  |
| C | 3.2902220358  | -0.47655475   | -1.2268222681 |
| H | 3.7826724261  | -1.3102714479 | -1.7434369468 |
| H | 4.0706773615  | 0.170126038   | -0.8170826521 |
| H | 2.7318894565  | 0.1004206544  | -1.9671874252 |
| C | 1.1834436938  | 1.1611330931  | 0.9118891275  |
| H | 1.9015758455  | 1.9779189657  | 0.8670915834  |
| C | 0.6795431963  | 0.7570565186  | 2.2679666783  |
| H | 0.0929422981  | 1.5538391967  | 2.7354635549  |
| H | 1.5286446078  | 0.5347297546  | 2.9176811496  |
| H | 0.0549907113  | -0.1367082619 | 2.2036049933  |
| C | -2.1404599359 | -1.9587976763 | 1.3476970264  |
| H | -2.4440777844 | -2.7641098126 | 0.669016523   |
| H | -1.0497078248 | -1.9615623293 | 1.4044667365  |
| H | -2.5277417031 | -2.1934759623 | 2.3428366375  |
| C | -4.1990128574 | -0.605237676  | 0.8186403767  |
| H | -4.5729805178 | -1.355497231  | 0.1128805523  |
| H | -4.6155661659 | -0.8372354183 | 1.8021458421  |
| H | -4.5845513444 | 0.3705448275  | 0.5097758484  |
| H | -4.5845513444 | 0.3705448275  | 0.5097758484  |

TS 6-311++G(d,p) 0038

E(UwB97XD) = -1036.89421591 A.U.

First frequency = -1475.7090 cm<sup>-1</sup>

|   |               |               |               |
|---|---------------|---------------|---------------|
| S | -0.1048522551 | 1.2558550617  | -0.4605139182 |
| O | -1.1148610955 | 2.1336452439  | 0.1247416835  |
| O | 0.059875058   | 1.2621971775  | -1.9121334512 |
| N | -0.4244523481 | -0.2835828789 | 0.052608759   |
| C | -1.5571100475 | -0.5548352235 | 0.9404508025  |
| H | -1.2006220284 | -1.2440811147 | 1.7154675627  |
| H | -1.832214323  | 0.3782596766  | 1.4336159823  |
| C | -2.7903399595 | -1.1538819541 | 0.2525858838  |
| H | -2.5051242115 | -2.1216314628 | -0.1776943078 |
| C | 0.1032941445  | -1.4362622835 | -0.6944030137 |
| H | -0.5171540682 | -1.6401884879 | -1.5739570886 |
| H | -0.0157427281 | -2.2845255285 | -0.0147451193 |
| C | 1.5677751624  | -1.3488863786 | -1.1315598873 |
| H | 1.6510782716  | -0.7253867343 | -2.0249678953 |
| H | 1.8635874143  | -2.3626469629 | -1.4338933129 |
| C | 2.5371319094  | -0.8350184764 | -0.0829060022 |
| H | 2.1232862698  | 0.3729410941  | 0.0804847037  |
| C | 2.4370054944  | -1.492745377  | 1.2760727201  |
| H | 2.6977570094  | -2.5568885664 | 1.203122494   |
| H | 1.4274080271  | -1.4232080224 | 1.688345118   |
| H | 3.1259451097  | -1.0297409067 | 1.9872203849  |
| C | 3.9515143998  | -0.6840532162 | -0.5988757296 |
| H | 3.9759271991  | -0.1110966265 | -1.5299068485 |
| H | 4.3922909132  | -1.66881758   | -0.8005837192 |
| H | 4.5876761059  | -0.1797910483 | 0.1335775267  |
| C | 1.4697291796  | 1.6025033328  | 0.2599864115  |
| H | 2.0029099397  | 2.3233211459  | -0.3568037122 |
| C | 1.461453161   | 1.8335432365  | 1.7456870458  |
| H | 2.4897931069  | 1.8688108006  | 2.1124221157  |
| H | 0.9451170915  | 1.0225181074  | 2.2658818469  |
| H | 0.9726440461  | 2.7765692812  | 2.0065585895  |
| C | -3.3103282947 | -0.2619501676 | -0.8718789971 |
| H | -4.1848503249 | -0.7145301502 | -1.3471007655 |
| H | -3.5994730344 | 0.7196735497  | -0.484165924  |
| H | -2.5530678055 | -0.1039452949 | -1.6447806946 |
| C | -3.8678412176 | -1.4100743354 | 1.3062653682  |
| H | -4.7422208221 | -1.8898339291 | 0.8592351565  |
| H | -3.4997440858 | -2.0591996244 | 2.1064258731  |

H -4.1970914919 -0.4686272186 1.7593141798  
H -4.1970914919 -0.4686272186 1.7593141798

TS 6-311++G(d,p) 0039

E(UwB97XD) = -1036.89263160 A.U.

First frequency = -1506.6768 cm<sup>-1</sup>

S -0.045972384 1.4366274004 0.7227689544  
O 0.64113747 1.4161219548 2.0089863811  
O -1.0675056302 2.4560263962 0.5020071689  
N -0.7838074143 -0.0415211575 0.5417761767  
C -1.6619785109 -0.1903482036 -0.629815037  
H -2.0582502672 0.8019954203 -0.8417391175  
H -1.0919092489 -0.5094626391 -1.5137599358  
C -2.8410981568 -1.1546361436 -0.3924374173  
H -3.0383875005 -1.1669076759 0.6850268356  
C -0.0401979701 -1.2241984614 1.0029777915  
H -0.7877524476 -1.9697653738 1.2784822963  
H 0.4680019861 -0.9515873711 1.9271626323  
C 0.9425129599 -1.823905526 -0.0087583272  
H 0.4154562575 -2.0524347562 -0.9400898058  
H 1.2749760657 -2.7905343692 0.3948512  
C 2.1676296616 -0.9758423736 -0.3145368897  
H 1.7002119586 0.2189332748 -0.4855806524  
C 3.1378703109 -0.8238981664 0.8388600704  
H 3.9530869893 -0.1444829508 0.5761563494  
H 3.5809785004 -1.7958645319 1.0907809536  
H 2.6501418065 -0.4312685242 1.7340203595  
C 2.8272422796 -1.3130787976 -1.6341943028  
H 2.1104456713 -1.2732397331 -2.4592696202  
H 3.2448389866 -2.3278442622 -1.6040616147  
H 3.6472016632 -0.6242161519 -1.8546089696  
C 1.1718926028 1.516104713 -0.5540273295  
H 0.6698895953 1.5471916743 -1.5206142987  
C 2.3000922455 2.4891471798 -0.3480701721  
H 1.9556311225 3.52752515 -0.3926781196  
H 3.0434502578 2.3485536561 -1.1359619941  
H 2.7831438635 2.3273608138 0.6171557914

|   |               |               |               |
|---|---------------|---------------|---------------|
| C | -2.5506325825 | -2.5821046286 | -0.8655972341 |
| H | -1.6837282657 | -3.0258222613 | -0.372194269  |
| H | -3.4089623126 | -3.2309171576 | -0.6719343778 |
| H | -2.3613526006 | -2.5926681661 | -1.9444500697 |
| C | -4.0878270619 | -0.6187131459 | -1.1010421542 |
| H | -3.9091118165 | -0.5234708853 | -2.1778403371 |
| H | -4.934509545  | -1.2963152049 | -0.9632596637 |
| H | -4.371441378  | 0.3645786918  | -0.7166374189 |
| H | -4.371441378  | 0.3645786918  | -0.7166374189 |

TS 6-311++G(d,p) 0047

E(UwB97XD) = -1036.89276447 A.U.

First frequency = -1529.8511 cm<sup>-1</sup>

|   |               |               |               |
|---|---------------|---------------|---------------|
| S | -0.2097013971 | 1.4305535102  | 0.6906806567  |
| O | 0.7388697785  | 1.8667417191  | 1.709885644   |
| O | -1.3983880993 | 2.2432899703  | 0.4506422542  |
| N | -0.7415316407 | -0.0708941795 | 1.1255876533  |
| C | -1.9901641646 | -0.5993222629 | 0.5627532018  |
| H | -2.2371153505 | -1.454166892  | 1.1972488306  |
| H | -2.773300287  | 0.1440352708  | 0.7222439274  |
| C | -1.9766143257 | -1.0378009055 | -0.92462232   |
| H | -0.9336842377 | -1.1076933927 | -1.2475524433 |
| C | 0.2316339546  | -1.0247319847 | 1.6725642955  |
| H | -0.3242852284 | -1.6710072549 | 2.3563046234  |
| H | 0.9400365991  | -0.4628336789 | 2.2818093114  |
| C | 0.9674233906  | -1.888342264  | 0.6422874994  |
| H | 0.2377992613  | -2.4466939264 | 0.049230033   |
| H | 1.5423298391  | -2.6398150263 | 1.2014062794  |
| C | 1.9195237483  | -1.1323452302 | -0.2726419755 |
| H | 1.3066331747  | -0.0274364992 | -0.575443141  |
| C | 3.1826909485  | -0.6456952736 | 0.4083962661  |
| H | 3.7820707953  | -0.031029932  | -0.2682343584 |
| H | 3.7984912453  | -1.4994142796 | 0.7184265834  |
| H | 2.9623850363  | -0.0492505464 | 1.2975272672  |
| C | 2.1568793291  | -1.8057664527 | -1.6065839438 |
| H | 2.6737866118  | -2.7636689485 | -1.4646062358 |
| H | 2.7788595394  | -1.1864607262 | -2.2585265415 |

|   |               |               |               |
|---|---------------|---------------|---------------|
| H | 1.2145388853  | -2.0118546287 | -2.1227788947 |
| C | 0.6951554551  | 1.2100620495  | -0.8135183419 |
| H | -0.0036907737 | 0.9997456413  | -1.6212136781 |
| C | 1.7690506881  | 2.2203783826  | -1.1097204694 |
| H | 2.3304952659  | 1.8976261836  | -1.9895780479 |
| H | 2.4603688872  | 2.314909726   | -0.2710622903 |
| H | 1.349079153   | 3.2086699228  | -1.3240640146 |
| C | -2.6868741196 | -0.0185492802 | -1.8188813464 |
| H | -2.2785061409 | 0.9871949611  | -1.6957553723 |
| H | -2.6049549901 | -0.3002292614 | -2.8722407783 |
| H | -3.7513351675 | 0.0293485551  | -1.5652610944 |
| C | -2.6065661548 | -2.4222174827 | -1.0817818117 |
| H | -3.6422344329 | -2.4175932157 | -0.7252450658 |
| H | -2.6159580765 | -2.7314617267 | -2.1303173463 |
| H | -2.058269868  | -3.1765010859 | -0.5092657067 |
| H | -2.058269868  | -3.1765010859 | -0.5092657067 |

TS 6-311++G(d,p) 0048

E(UwB97XD) = -1036.89312402 A.U.

First frequency = -1490.8427 cm<sup>-1</sup>

|   |               |               |               |
|---|---------------|---------------|---------------|
| S | -0.1991075215 | 1.1805719472  | 0.3638173661  |
| O | -0.2133133046 | 1.0862003551  | 1.8223148691  |
| O | -1.1331602645 | 2.1082400137  | -0.2704358089 |
| N | -0.4524721533 | -0.3153555994 | -0.2963812594 |
| C | -1.5311255468 | -0.5250851868 | -1.2659578722 |
| H | -1.7723519945 | 0.438103054   | -1.7170885163 |
| H | -1.1275019803 | -1.1671236949 | -2.0577722152 |
| C | -2.8065845763 | -1.1605189137 | -0.6973393153 |
| H | -2.550606863  | -2.1553762055 | -0.3130522796 |
| C | 0.0119500353  | -1.5135180348 | 0.4207519922  |
| H | -0.0609170807 | -2.3213632397 | -0.312290122  |
| H | -0.6710520005 | -1.7603747535 | 1.2409600066  |
| C | 1.4412184049  | -1.4587644556 | 0.9649279676  |
| H | 1.7114549686  | -2.4871027755 | 1.2400751561  |
| H | 1.4621472291  | -0.8783173058 | 1.8912644406  |
| C | 2.4823358891  | -0.8989490248 | 0.0133789657  |
| H | 2.071610637   | 0.3122332827  | -0.1190870158 |

|   |               |               |               |
|---|---------------|---------------|---------------|
| C | 3.8559206545  | -0.7779213973 | 0.6364751058  |
| H | 4.5428796407  | -0.2382480562 | -0.0209127439 |
| H | 4.2826084493  | -1.7728135199 | 0.8189195487  |
| H | 3.813443106   | -0.2542742683 | 1.5956263935  |
| C | 2.477227385   | -1.4828884535 | -1.3822586392 |
| H | 1.5039777024  | -1.3671370929 | -1.8656649772 |
| H | 2.7124932537  | -2.5547819232 | -1.3491655469 |
| H | 3.2275804978  | -0.9970635102 | -2.0112875861 |
| C | 1.4476636435  | 1.5674863444  | -0.1506504125 |
| H | 1.4249010167  | 1.7889839058  | -1.2167785091 |
| C | 2.219972276   | 2.5118053682  | 0.7270688949  |
| H | 2.2490208078  | 2.1525633521  | 1.7573662166  |
| H | 1.7884841517  | 3.5185122012  | 0.7267804437  |
| H | 3.244798905   | 2.5873025139  | 0.3567183811  |
| C | -3.8135941909 | -1.343665451  | -1.8329771838 |
| H | -3.394787116  | -1.941725169  | -2.6478178855 |
| H | -4.7153671935 | -1.8470059399 | -1.475214425  |
| H | -4.1122035292 | -0.3734876083 | -2.2447769283 |
| C | -3.4000057832 | -0.3419641559 | 0.4465272061  |
| H | -3.6723915173 | 0.6611489749  | 0.1042535517  |
| H | -4.2994921412 | -0.8258660623 | 0.8367528534  |
| H | -2.6937081325 | -0.2311774369 | 1.2739089598  |
| H | -2.6937081325 | -0.2311774369 | 1.2739089598  |

TS 6-311++G(d,p) 0056

E(UwB97XD) = -1036.89381439 A.U.

First frequency = -1493.8893  $\text{cm}^{-1}$

|   |               |               |               |
|---|---------------|---------------|---------------|
| S | -0.1849673061 | 1.3583947482  | 0.6045895483  |
| O | 0.4181816106  | 1.6208813225  | 1.9106389398  |
| O | -1.3103692838 | 2.1992054228  | 0.200216031   |
| N | -0.6809824499 | -0.2246460785 | 0.5007308539  |
| C | -2.112665595  | -0.5172904395 | 0.3524652893  |
| H | -2.4640003141 | -1.011182271  | 1.2664976433  |
| H | -2.6589185352 | 0.4222022907  | 0.2616059241  |
| C | -2.4072304848 | -1.3896184044 | -0.8710823152 |
| H | -1.7915466757 | -2.2958243326 | -0.8058607126 |
| C | 0.0640194795  | -1.2437379699 | 1.2638167409  |

|   |               |               |               |
|---|---------------|---------------|---------------|
| H | -0.2923930782 | -2.200742602  | 0.8764220801  |
| H | -0.2188352522 | -1.1977209876 | 2.3223940522  |
| C | 1.5888673794  | -1.1961546535 | 1.1502895159  |
| H | 1.9643613414  | -2.1430351133 | 1.5605801969  |
| H | 1.9812505838  | -0.405071819  | 1.7947655219  |
| C | 2.1372655615  | -0.9998653649 | -0.2512302035 |
| H | 1.6685208366  | 0.1628137081  | -0.5356074503 |
| C | 3.6401284287  | -0.8249184794 | -0.2843074171 |
| H | 3.9840490562  | -0.5467330627 | -1.2841641609 |
| H | 4.140039503   | -1.7627121999 | -0.0093754378 |
| H | 3.9681682275  | -0.0553876245 | 0.4200124127  |
| C | 1.5988963997  | -1.9417963226 | -1.3048444434 |
| H | 1.981369799   | -1.6812287776 | -2.2951635749 |
| H | 0.5082113772  | -1.9239547067 | -1.3470678772 |
| H | 1.9110532789  | -2.9717057208 | -1.087209376  |
| C | 1.0826155821  | 1.4365354339  | -0.6244510152 |
| H | 0.6063076216  | 1.4120304195  | -1.6032621174 |
| C | 2.1515835551  | 2.4717359024  | -0.4141485176 |
| H | 2.6163410694  | 2.361567497   | 0.5672538798  |
| H | 1.7575714183  | 3.4903705042  | -0.4950894556 |
| H | 2.9219102133  | 2.3496222205  | -1.1788166865 |
| C | -2.0589231868 | -0.6592423845 | -2.1659061949 |
| H | -2.2312691595 | -1.3009146765 | -3.0342201795 |
| H | -2.6764912745 | 0.2382498294  | -2.2787800336 |
| H | -1.0106603077 | -0.351291684  | -2.1774318051 |
| C | -3.8750607651 | -1.8149743047 | -0.8488076982 |
| H | -4.1082130986 | -2.4518258991 | -1.7059237295 |
| H | -4.1165898676 | -2.3712185306 | 0.0615149065  |
| H | -4.5319342045 | -0.9394694883 | -0.8940068067 |
| H | -4.5319342045 | -0.9394694883 | -0.8940068067 |

TS 6-311++G(d,p) 0057

E(UwB97XD) = -1036.89336453 A.U.

First frequency = -1428.5335 cm<sup>-1</sup>

|   |               |              |               |
|---|---------------|--------------|---------------|
| S | 0.0138091917  | 1.4639850823 | -0.5865805609 |
| O | -1.0533579894 | 2.3429655617 | -0.1133677211 |
| O | 0.5758496338  | 1.7298734185 | -1.9108536967 |



|   |               |               |               |
|---|---------------|---------------|---------------|
| N | -0.564797931  | -0.1056334283 | -0.4987062651 |
| C | -2.0266833432 | -0.2830819179 | -0.5005464111 |
| H | -2.4935884365 | 0.6710870062  | -0.2550807453 |
| H | -2.3518268697 | -0.5574586593 | -1.5127196001 |
| C | -2.5034615301 | -1.3363477539 | 0.5044654698  |
| H | -1.9654695013 | -2.27385106   | 0.318732576   |
| C | 0.1235100562  | -1.1207810235 | -1.3244795321 |
| H | -0.170340216  | -1.0030973318 | -2.3747768462 |
| H | -0.2781108794 | -2.0768576848 | -0.9838248547 |
| C | 1.6504231471  | -1.1654555006 | -1.2385836932 |
| H | 2.0795975935  | -0.3878894146 | -1.8760580677 |
| H | 1.9601172135  | -2.1250674989 | -1.6731008433 |
| C | 2.2360699731  | -1.0278802307 | 0.1542560517  |
| H | 1.8687504918  | 0.1632855948  | 0.4375787349  |
| C | 1.641950399   | -1.9331497236 | 1.2097707037  |
| H | 1.886470539   | -2.9806789057 | 0.9892472134  |
| H | 0.5548244328  | -1.8453322963 | 1.2538053507  |
| H | 2.0447866856  | -1.6999909813 | 2.19886455    |
| C | 3.7480828796  | -0.9690303841 | 0.1647127065  |
| H | 4.1219399175  | -0.2175344751 | -0.5362333883 |
| H | 4.169836423   | -1.9388356553 | -0.1284761357 |
| H | 4.1269959706  | -0.7301520908 | 1.1620843577  |
| C | 1.3451541985  | 1.4628481133  | 0.5738013726  |
| H | 2.1278566137  | 2.1209512085  | 0.2017804357  |
| C | 0.9673596056  | 1.5954106063  | 2.021928737   |
| H | 1.8603964246  | 1.4665860078  | 2.6376168255  |
| H | 0.240066196   | 0.8355531373  | 2.3126063724  |
| H | 0.5406785736  | 2.5785956856  | 2.2395149431  |
| C | -3.9925733868 | -1.598932345  | 0.2769990443  |
| H | -4.1867400613 | -1.9479951955 | -0.7411642749 |
| H | -4.3626314316 | -2.3577129126 | 0.9711088557  |
| H | -4.575334281  | -0.6853902235 | 0.4379630884  |
| C | -2.2338662575 | -0.9023864123 | 1.9425855579  |
| H | -2.5776369257 | -1.6625367394 | 2.6492550822  |
| H | -1.1682361379 | -0.7415770709 | 2.1139572307  |
| H | -2.7573632264 | 0.0330323137  | 2.1680296982  |
| H | -2.7573632264 | 0.0330323137  | 2.1680296982  |

TS 6-311++G(d,p) 0058

E(UwB97XD) = -1036.89208487 A.U.

First frequency = -1507.1248 cm<sup>-1</sup>

|   |               |               |               |
|---|---------------|---------------|---------------|
| S | 0.0029867858  | 1.0864563958  | -0.9880058366 |
| O | -1.0230915614 | 2.0869278585  | -0.7068717567 |
| O | 0.3205599784  | 0.7774110024  | -2.3788400715 |
| N | -0.4602104194 | -0.3069655081 | -0.2441655626 |
| C | -1.4936063853 | -0.2653993854 | 0.7960478077  |
| H | -1.2761994612 | -1.0887841373 | 1.4861664895  |
| H | -1.3829001264 | 0.6597915392  | 1.365369141   |
| C | -2.9414277832 | -0.3737277024 | 0.3065947729  |
| H | -3.1328810302 | 0.4989128433  | -0.3263200243 |
| C | 0.1006563454  | -1.6012156127 | -0.6683094451 |
| H | -0.3911473481 | -1.9529130728 | -1.5793559007 |
| H | -0.1686338    | -2.2985476749 | 0.1271853454  |
| C | 1.6175520901  | -1.6441421922 | -0.8906950428 |
| H | 1.8550107246  | -1.2288363603 | -1.8732949031 |
| H | 1.8966307188  | -2.706024138  | -0.9297753402 |
| C | 2.465240768   | -0.93952106   | 0.1516495414  |
| H | 2.1023364096  | 0.2884617354  | -0.0047286423 |
| C | 2.1576383491  | -1.2877148815 | 1.591451777   |
| H | 2.3783965116  | -2.346539226  | 1.7807629439  |
| H | 1.1072921406  | -1.1182635245 | 1.8396262766  |
| H | 2.7668587791  | -0.6936633203 | 2.2775079849  |
| C | 3.9412027035  | -0.9348454324 | -0.1828141576 |
| H | 4.1170681566  | -0.5731371808 | -1.1996192155 |
| H | 4.3526760297  | -1.9499774023 | -0.1131898732 |
| H | 4.5013127627  | -0.3015095598 | 0.5105064843  |
| C | 1.513262638   | 1.5475339139  | -0.1907940219 |
| H | 2.1481041623  | 2.079700565   | -0.8965665232 |
| C | 1.3806192872  | 2.1309722516  | 1.1894306198  |
| H | 2.3761930644  | 2.2827122999  | 1.6122142363  |
| H | 0.834083172   | 1.458842097   | 1.8556109398  |
| H | 0.8641918238  | 3.0950076047  | 1.17472196    |
| C | -3.875279541  | -0.3114846966 | 1.5156921378  |
| H | -3.7132803387 | -1.1701057674 | 2.177288579   |
| H | -3.7147730487 | 0.5995150888  | 2.0997445069  |

|   |               |               |               |
|---|---------------|---------------|---------------|
| H | -4.9211392281 | -0.3279969666 | 1.1988898526  |
| C | -3.1898431145 | -1.6356148778 | -0.5170326772 |
| H | -2.931804431  | -2.5346967094 | 0.0544169377  |
| H | -4.2444963119 | -1.7081943829 | -0.79623656   |
| H | -2.6036761717 | -1.636268378  | -1.4384795003 |
| H | -2.6036761717 | -1.636268378  | -1.4384795003 |

TS 6-311++G(d,p) 0059

E(UwB97XD) = -1036.89144051 A.U.

First frequency = -1525.3057  $\text{cm}^{-1}$

|   |               |               |               |
|---|---------------|---------------|---------------|
| S | -0.1664954922 | 1.0589962908  | 0.9280036341  |
| O | 0.1737403902  | 0.7844298176  | 2.3202822679  |
| O | -1.2388243106 | 2.0103399347  | 0.6471014957  |
| N | -0.5740371649 | -0.3653369896 | 0.2181348431  |
| C | -1.4757899788 | -0.3522180236 | -0.9386947494 |
| H | -1.3243226847 | 0.5722443272  | -1.5021505172 |
| H | -1.1679940841 | -1.1734511996 | -1.5951786661 |
| C | -2.9615213188 | -0.4993094722 | -0.5988963858 |
| H | -3.235450966  | 0.3617361746  | 0.019404967   |
| C | 0.0578121214  | -1.6238099904 | 0.6513652747  |
| H | -0.1816256785 | -2.3446931423 | -0.1321647367 |
| H | -0.4145763125 | -1.9846873699 | 1.569050351   |
| C | 1.576343688   | -1.5848218137 | 0.8676468066  |
| H | 1.9091881834  | -2.6295760202 | 0.9379045055  |
| H | 1.7928767763  | -1.1280999037 | 1.8367271528  |
| C | 2.3868526099  | -0.8697775907 | -0.1976006896 |
| H | 1.9363155734  | 0.3387809135  | -0.1150471698 |
| C | 3.8541192807  | -0.7498045582 | 0.1544507955  |
| H | 4.333695457   | -1.7371832617 | 0.1393064663  |
| H | 3.9904953937  | -0.3299679584 | 1.1549515055  |
| H | 4.3821765284  | -0.1139815368 | -0.5612468463 |
| C | 2.1257399468  | -1.3015540958 | -1.623862377  |
| H | 2.4014270415  | -2.3554679461 | -1.7597944363 |
| H | 2.7180814942  | -0.7094733354 | -2.3262405004 |
| H | 1.0741039567  | -1.1952903813 | -1.899329622  |
| C | 1.304516067   | 1.5731534788  | 0.0882612279  |
| H | 1.0354602039  | 1.8788340757  | -0.9223493829 |

|   |               |               |               |
|---|---------------|---------------|---------------|
| C | 2.2313846299  | 2.4832791892  | 0.8451466661  |
| H | 3.141950311   | 2.6351843755  | 0.2613814095  |
| H | 2.5050420729  | 2.0485069348  | 1.8081182316  |
| H | 1.781829708   | 3.4654217194  | 1.026753845   |
| C | -3.2442024173 | -1.7762934791 | 0.1895168794  |
| H | -2.7176259682 | -1.7804927737 | 1.1466829299  |
| H | -4.3133891998 | -1.8710081351 | 0.3973458183  |
| H | -2.9327355952 | -2.6620852081 | -0.3762835942 |
| C | -3.7767345364 | -0.4525744916 | -1.8910333361 |
| H | -4.8469624995 | -0.5085543192 | -1.6765712922 |
| H | -3.5928522553 | 0.4712822737  | -2.4473971878 |
| H | -3.5225533997 | -1.2961361978 | -2.5429068546 |
| H | -3.5225533997 | -1.2961361978 | -2.5429068546 |

TS 6-311++G(d,p) 0065

E(UwB97XD) = -1036.89277018 A.U.

First frequency = -1429.4573 cm<sup>-1</sup>

|   |               |               |               |
|---|---------------|---------------|---------------|
| S | -0.0526926785 | 1.3859130213  | -0.3519770145 |
| O | -1.1491562939 | 2.1728244383  | 0.2092609829  |
| O | 0.5298366022  | 1.8486687488  | -1.6112694387 |
| N | -0.6073369643 | -0.1818389741 | -0.4793007456 |
| C | -2.0737615199 | -0.3548522001 | -0.4335964559 |
| H | -2.5755788778 | 0.5004774046  | -0.8924356407 |
| H | -2.3016384497 | -1.2235619065 | -1.0586278162 |
| C | -2.6219807536 | -0.5883961694 | 0.9742481192  |
| H | -2.2979805776 | 0.2522670926  | 1.5964467629  |
| C | 0.0796796334  | -1.1188065352 | -1.3966251798 |
| H | -0.3250856691 | -1.0044304872 | -2.4094770431 |
| H | -0.2058427427 | -2.112849406  | -1.0428056067 |
| C | 1.6050917198  | -1.0350863057 | -1.4811947091 |
| H | 1.8930242933  | -0.1657629522 | -2.076019115  |
| H | 1.9240350364  | -1.9188365718 | -2.0504761979 |
| C | 2.3588530536  | -0.9972419611 | -0.1640883622 |
| H | 1.9110869924  | 0.0829471175  | 0.359199228   |
| C | 2.029112374   | -2.1047665425 | 0.8108852491  |
| H | 2.3584357008  | -3.0723269935 | 0.4098675288  |
| H | 0.9566502555  | -2.172495272  | 1.0011319395  |

|   |               |               |               |
|---|---------------|---------------|---------------|
| H | 2.5354733536  | -1.951300683  | 1.7673186629  |
| C | 3.8413346205  | -0.7452358082 | -0.3351673016 |
| H | 4.0256691596  | 0.1388617887  | -0.9515844507 |
| H | 4.3199423763  | -1.601847273  | -0.8268242987 |
| H | 4.331354877   | -0.6008950003 | 0.6314602747  |
| C | 1.2499895864  | 1.2344223119  | 0.8249812178  |
| H | 1.9552547217  | 2.0503877326  | 0.6786546847  |
| C | 0.8259815634  | 0.9279976025  | 2.2336115113  |
| H | 1.7103104234  | 0.7213255193  | 2.8403975665  |
| H | 0.1777805616  | 0.0491331449  | 2.2634755594  |
| H | 0.2902535634  | 1.7675602866  | 2.6863568652  |
| C | -2.0840521686 | -1.8836692789 | 1.5760397141  |
| H | -0.9924689912 | -1.8812454717 | 1.6081504213  |
| H | -2.4487293151 | -2.0217734217 | 2.5974531964  |
| H | -2.4033805829 | -2.7488017191 | 0.9838662008  |
| C | -4.149602174  | -0.5927246721 | 0.9287604462  |
| H | -4.5395705615 | 0.3534205981  | 0.542843948   |
| H | -4.517576424  | -1.3986759513 | 0.2837703957  |
| H | -4.5673334805 | -0.748613431  | 1.9267483861  |
| H | -4.5673334805 | -0.748613431  | 1.9267483861  |

TS 6-311++G(d,p) 0068

E(UwB97XD) = -1036.88720296 A.U.

First frequency = -1419.4411 cm<sup>-1</sup>

|   |               |               |               |
|---|---------------|---------------|---------------|
| S | -0.0960779786 | 1.1750632632  | 0.2592094092  |
| O | 0.3338318208  | 1.1199504608  | 1.6607568072  |
| O | -1.0961323245 | 2.2007717325  | -0.0405578086 |
| N | -0.7234492627 | -0.278454476  | -0.2602443961 |
| C | -1.9491909987 | -0.6677221131 | 0.4586339962  |
| H | -1.7018105513 | -1.4153734223 | 1.222478557   |
| H | -2.3442107423 | 0.2069653423  | 0.982759166   |
| C | -3.034396887  | -1.1985558755 | -0.4818078566 |
| H | -2.6155312976 | -2.0346405536 | -1.0549727752 |
| C | 0.1749492148  | -1.3952389928 | -0.6137312469 |
| H | 0.5854891108  | -1.2134340173 | -1.610640348  |
| H | -0.4827446457 | -2.2585322348 | -0.7128763951 |
| C | 1.3059721637  | -1.7162231971 | 0.375161205   |

|   |               |               |               |
|---|---------------|---------------|---------------|
| H | 1.5553021755  | -2.7797054074 | 0.2762764081  |
| H | 0.9436847896  | -1.5661481705 | 1.3958300546  |
| C | 2.5648494141  | -0.8914808029 | 0.1269269156  |
| H | 2.0764013814  | 0.2089186847  | -0.3043795692 |
| C | 3.3511892434  | -0.5399576563 | 1.3685987473  |
| H | 4.1975190055  | 0.1105516199  | 1.1310942726  |
| H | 3.7520224105  | -1.4499325366 | 1.8342996745  |
| H | 2.7152511901  | -0.0363313476 | 2.1001346242  |
| C | 3.4094370617  | -1.3869521087 | -1.0290374729 |
| H | 3.8881100394  | -2.3381565355 | -0.7641229042 |
| H | 4.199416942   | -0.6724383811 | -1.2750790868 |
| H | 2.8126507737  | -1.556933559  | -1.9296766209 |
| C | 1.3420300931  | 1.3389013743  | -0.7392027225 |
| H | 1.0967214994  | 1.1798656927  | -1.7875079906 |
| C | 2.1886838314  | 2.5392687522  | -0.4113812994 |
| H | 3.1114309588  | 2.4903018435  | -0.9927690253 |
| H | 2.449248335   | 2.557196292   | 0.6486004802  |
| H | 1.6819380636  | 3.4765876837  | -0.6620523179 |
| C | -3.4918666784 | -0.1233459504 | -1.4638931837 |
| H | -2.6483517788 | 0.2751901718  | -2.0314961825 |
| H | -4.2231938373 | -0.5287470813 | -2.1684222431 |
| H | -3.9612520364 | 0.7095149731  | -0.9295946574 |
| C | -4.2015433066 | -1.7344100725 | 0.347236544   |
| H | -3.8807400931 | -2.5323165253 | 1.0232112375  |
| H | -4.6452240787 | -0.9363138675 | 0.9523395869  |
| H | -4.9844710854 | -2.135376395  | -0.3014332077 |
| H | -4.9844710854 | -2.135376395  | -0.3014332077 |

TS 6-311++G(d,p) 0069

E(UwB97XD) = -1036.89099421 A.U.

First frequency = -1475.8256 cm<sup>-1</sup>

|   |               |               |              |
|---|---------------|---------------|--------------|
| S | -0.129508466  | 1.3125582217  | 0.2263034823 |
| O | 0.4010321844  | 1.8135129277  | 1.4943455346 |
| O | -1.1732004636 | 2.1095735519  | -0.416278922 |
| N | -0.7257333834 | -0.2343041566 | 0.389034025  |
| C | -2.1881203635 | -0.3913837582 | 0.2568135377 |
| H | -2.4433307795 | -1.2909107405 | 0.824547293  |

|   |               |               |               |
|---|---------------|---------------|---------------|
| H | -2.7146047507 | 0.4397280731  | 0.7350645607  |
| C | -2.675431692  | -0.5606674311 | -1.1835522275 |
| H | -2.4401685972 | 0.3601437855  | -1.7253568406 |
| C | -0.109845838  | -1.1224882853 | 1.3999879303  |
| H | -0.4370564716 | -2.127158386  | 1.1226248304  |
| H | -0.526268008  | -0.9046233105 | 2.3909005515  |
| C | 1.4169467654  | -1.1048717293 | 1.4994798758  |
| H | 1.6912679642  | -1.9557567748 | 2.1377421072  |
| H | 1.7420427432  | -0.2064873144 | 2.0288163989  |
| C | 2.1727979989  | -1.2011707908 | 0.1867249702  |
| H | 1.7596680026  | -0.145907275  | -0.4206417689 |
| C | 3.663513601   | -0.9899292336 | 0.3416819796  |
| H | 4.159828585   | -0.9431421456 | -0.631383228  |
| H | 4.1102256245  | -1.820608529  | 0.9033273998  |
| H | 3.8815959809  | -0.0665595382 | 0.885317185   |
| C | 1.8043865642  | -2.3725991863 | -0.6954644535 |
| H | 0.7280975227  | -2.4330873131 | -0.8650510313 |
| H | 2.122983348   | -3.3124749251 | -0.2256840902 |
| H | 2.2997620978  | -2.3035294626 | -1.6675312014 |
| C | 1.2155089571  | 1.0623521244  | -0.8880753594 |
| H | 0.8046182229  | 0.7811339207  | -1.8566114086 |
| C | 2.2911133172  | 2.1118687395  | -0.8767242458 |
| H | 1.9279175672  | 3.0745131566  | -1.2520616559 |
| H | 3.1119802914  | 1.7902583783  | -1.5213517744 |
| H | 2.6809102549  | 2.2619438791  | 0.1317499291  |
| C | -4.1936899276 | -0.7387964592 | -1.1750361107 |
| H | -4.6927680642 | 0.1051519563  | -0.6898973353 |
| H | -4.5803442951 | -0.8175122621 | -2.1943351947 |
| H | -4.4762026863 | -1.6521100023 | -0.639119624  |
| C | -1.9815560169 | -1.7269092719 | -1.8819003998 |
| H | -0.9047320858 | -1.5590084711 | -1.9468374928 |
| H | -2.149803193  | -2.6648618799 | -1.3396320943 |
| H | -2.3654386361 | -1.8533616715 | -2.897901639  |
| H | -2.3654386361 | -1.8533616715 | -2.897901639  |

TS 6-311++G(d,p) 0081

E(UwB97XD) = -1036.88964244 A.U.

First frequency = -1440.1376 cm<sup>-1</sup>

|   |               |               |               |
|---|---------------|---------------|---------------|
| S | 0.0666206829  | 1.0037076707  | -0.8489284185 |
| O | -0.9508459619 | 2.0517052469  | -0.8028996761 |
| O | 0.5660905323  | 0.6070343892  | -2.1615538582 |
| N | -0.5906747963 | -0.306452831  | -0.0892225642 |
| C | -1.8383732898 | -0.1266587488 | 0.6690067633  |
| H | -1.788511622  | -0.8125267894 | 1.5221874513  |
| H | -1.8846133854 | 0.8856462775  | 1.075158866   |
| C | -3.1028039427 | -0.4072265507 | -0.1466091092 |
| H | -3.1237669356 | 0.3194759691  | -0.9661019547 |
| C | 0.195882002   | -1.5010664192 | 0.2857539181  |
| H | -0.4783722933 | -2.3500732271 | 0.15635991    |
| H | 0.4280569245  | -1.4418023748 | 1.3571062682  |
| C | 1.4743227042  | -1.7825783332 | -0.5020575727 |
| H | 1.2718495657  | -1.6929680692 | -1.5706422409 |
| H | 1.7257689655  | -2.8342737721 | -0.3130198888 |
| C | 2.6829567461  | -0.9332978417 | -0.1239650821 |
| H | 2.2012915448  | 0.2496608018  | -0.0026608022 |
| C | 3.2701784263  | -1.2371306756 | 1.2390381108  |
| H | 4.0433047252  | -0.5106625646 | 1.502916796   |
| H | 3.7334237079  | -2.2321842621 | 1.2366978908  |
| H | 2.5146370253  | -1.2257627489 | 2.0288825979  |
| C | 3.7099669232  | -0.8197923985 | -1.2279978191 |
| H | 4.5277437027  | -0.1525869344 | -0.9424548957 |
| H | 3.2524267735  | -0.4404870971 | -2.1450428462 |
| H | 4.1439185007  | -1.8039694055 | -1.4477281333 |
| C | 1.4756072475  | 1.4502354161  | 0.1103701776  |
| H | 2.072628171   | 2.1691479539  | -0.4480352699 |
| C | 1.2293262819  | 1.7382171161  | 1.5647051308  |
| H | 2.184979422   | 1.8747965941  | 2.0749317402  |
| H | 0.7016867217  | 0.9147563433  | 2.0529870001  |
| H | 0.6394336114  | 2.6501690409  | 1.702299768   |
| C | -4.3311275909 | -0.1808056546 | 0.7338830982  |
| H | -4.3410982676 | -0.8824412581 | 1.5757178901  |
| H | -4.3501082223 | 0.8346333993  | 1.1404319419  |
| H | -5.2510125998 | -0.3324516821 | 0.1633619887  |
| C | -3.0980605449 | -1.8118837199 | -0.7454030634 |
| H | -4.000622079  | -1.9816451669 | -1.3386477918 |
| H | -2.2346524084 | -1.9608659041 | -1.3990046223 |



|   |               |              |              |
|---|---------------|--------------|--------------|
| H | -3.0685099191 | -2.571934758 | 0.0441221293 |
| H | -3.0685099191 | -2.571934758 | 0.0441221293 |

TS 6-311++G(d,p) 0082

E(UwB97XD) = -1036.88715891 A.U.

First frequency = -1427.9342 cm<sup>-1</sup>

|   |               |               |               |
|---|---------------|---------------|---------------|
| S | -0.156538293  | 1.1064780527  | 0.1836196485  |
| O | 0.1681024311  | 1.0138893562  | 1.6044116894  |
| O | -1.1163260121 | 2.1368657987  | -0.2073394573 |
| N | -0.7643942245 | -0.3516788799 | -0.3257199301 |
| C | -1.9271901608 | -0.3566738589 | -1.2310968915 |
| H | -2.0640722902 | 0.6417940119  | -1.6468666186 |
| H | -1.6896547029 | -1.0268999999 | -2.0642797183 |
| C | -3.2324293541 | -0.8016634173 | -0.5573055457 |
| H | -3.9816414189 | -0.7933719323 | -1.359528533  |
| C | 0.1264792736  | -1.5230004042 | -0.4818244495 |
| H | 0.5691325314  | -1.5063410187 | -1.4876288276 |
| H | -0.533836606  | -2.3883606747 | -0.4446532449 |
| C | 1.2240099693  | -1.7039959725 | 0.5689410123  |
| H | 1.4735874349  | -2.7720344329 | 0.5895158921  |
| H | 0.8269003618  | -1.4509094749 | 1.5537519188  |
| C | 2.5025489183  | -0.9195233737 | 0.2906143612  |
| H | 2.0537694769  | 0.1704566467  | -0.2086715024 |
| C | 3.2679808263  | -0.5178274324 | 1.530454948   |
| H | 4.1354913919  | 0.09869595    | 1.2790865961  |
| H | 3.6351536144  | -1.409199039  | 2.0562140627  |
| H | 2.6274545441  | 0.0398628871  | 2.2176663452  |
| C | 3.3643357043  | -1.5004059427 | -0.8114280328 |
| H | 4.1790834449  | -0.8201994733 | -1.0736499021 |
| H | 2.7893914082  | -1.7055929835 | -1.7186623131 |
| H | 3.8114978739  | -2.446471177  | -0.4805607406 |
| C | 1.3659005805  | 1.3039610787  | -0.6842793164 |
| H | 1.2061455428  | 1.1373311398  | -1.7489512904 |
| C | 2.1897674052  | 2.5008225529  | -0.2947337732 |
| H | 1.700271647   | 3.4394396024  | -0.5739353853 |
| H | 3.1516515025  | 2.457421521   | -0.8101521784 |
| H | 2.3758992192  | 2.5138026777  | 0.7809691592  |

|   |               |               |               |
|---|---------------|---------------|---------------|
| C | -3.6791031062 | 0.1826042513  | 0.5222664194  |
| H | -3.7744615612 | 1.1954219344  | 0.1243585682  |
| H | -4.6433172626 | -0.1190237855 | 0.9408383867  |
| H | -2.9522117354 | 0.2127628534  | 1.3401462545  |
| C | -3.1552382208 | -2.2221998436 | 0.0017564294  |
| H | -4.1282421107 | -2.5330911627 | 0.3915701603  |
| H | -2.8555002898 | -2.94352823   | -0.7648162431 |
| H | -2.4378724414 | -2.2756029188 | 0.8270001414  |
| H | -2.4378724414 | -2.2756029188 | 0.8270001414  |

TS 6-311++G(d,p) 0089

E(UwB97XD) = -1036.88519226 A.U.

First frequency = -1419.4291 cm<sup>-1</sup>

|   |               |               |               |
|---|---------------|---------------|---------------|
| S | -0.1588203394 | 1.0915536335  | 0.4591787125  |
| O | 0.4176617267  | 0.9404425557  | 1.8000188303  |
| O | -1.2052211284 | 2.1077257368  | 0.349746023   |
| N | -0.8006898039 | -0.3380293127 | -0.1093181988 |
| C | -1.9766717714 | -0.7934424263 | 0.661239861   |
| H | -1.7146290913 | -1.7243715765 | 1.1760148899  |
| H | -2.197981172  | -0.0599906725 | 1.44045351    |
| C | -3.2390383836 | -0.9875600273 | -0.1890252975 |
| H | -3.999299225  | -1.3412877397 | 0.5192429873  |
| C | 0.1014363339  | -1.4011356059 | -0.6032207394 |
| H | 0.403976971   | -1.1541778273 | -1.6249696212 |
| H | -0.5279334405 | -2.2848642741 | -0.6812809946 |
| C | 1.3360486538  | -1.7282754845 | 0.2509163531  |
| H | 1.6068570143  | -2.7747251738 | 0.0645045293  |
| H | 1.0727356575  | -1.6493196377 | 1.308843181   |
| C | 2.5393382629  | -0.847554326  | -0.0696178054 |
| H | 1.9779793952  | 0.2566054753  | -0.3828006607 |
| C | 3.4345567914  | -0.5403429294 | 1.108482591   |
| H | 3.9032628681  | -1.4613294493 | 1.47961901    |
| H | 2.8595766033  | -0.0987409412 | 1.9255239065  |
| H | 4.2358374092  | 0.1492363699  | 0.8286278436  |
| C | 3.2789079462  | -1.2480504996 | -1.3297032831 |
| H | 4.0189440176  | -0.4936855427 | -1.6097654916 |
| H | 2.6006699852  | -1.3891838584 | -2.1760378736 |

|   |               |               |               |
|---|---------------|---------------|---------------|
| H | 3.809694977   | -2.1949576037 | -1.1688673188 |
| C | 1.1629424009  | 1.3790103277  | -0.664898475  |
| H | 0.8177008148  | 1.2753607151  | -1.6917105431 |
| C | 1.9957033574  | 2.590811781   | -0.3435577604 |
| H | 2.3618432244  | 2.5540638231  | 0.6843081899  |
| H | 1.4334755502  | 3.5199805858  | -0.4804034823 |
| H | 2.8562365602  | 2.6168148741  | -1.0149503686 |
| C | -3.081782108  | -2.0544635979 | -1.2727187203 |
| H | -4.0372944735 | -2.2253784046 | -1.7756806952 |
| H | -2.3618840921 | -1.7388147627 | -2.0343754051 |
| H | -2.7481615726 | -3.0103105946 | -0.8570229369 |
| C | -3.7225292577 | 0.3304681518  | -0.7899858458 |
| H | -4.6544535275 | 0.1802552343  | -1.3421692386 |
| H | -3.8957763478 | 1.0817534521  | -0.0159837709 |
| H | -2.9755192282 | 0.7333007974  | -1.4793700828 |
| H | -2.9755192282 | 0.7333007974  | -1.4793700828 |

## 7 Enantioselective dialkylzinc additions on benzaldehyde

### 7.1 25 *anti pro-R*

#### 7.1.1 Starting TS

TS input

E(RB-P86) = -5316.45242351 A.U.

First frequency = -196.2901 cm<sup>-1</sup>

|   |         |          |          |
|---|---------|----------|----------|
| C | 2.67809 | -1.78196 | -0.16461 |
| C | 4.06831 | -0.53681 | -1.6983  |
| C | 4.69331 | -1.7133  | -2.13779 |
| C | 4.32835 | -2.94609 | -1.58292 |
| C | 3.32791 | -2.96365 | -0.60385 |
| C | 1.62935 | -2.08254 | 0.87682  |
| C | 2.01107 | -2.50348 | 2.16617  |
| C | 1.0348  | -3.02825 | 3.02751  |
| C | -0.2825 | -3.15062 | 2.57484  |

|   |          |          |          |
|---|----------|----------|----------|
| C | -0.61298 | -2.70474 | 1.27285  |
| H | 4.40061  | 0.40495  | -2.14736 |
| H | 5.47085  | -1.65617 | -2.91614 |
| H | 4.80555  | -3.8833  | -1.90884 |
| H | 3.0188   | -3.92472 | -0.16237 |
| H | 3.0656   | -2.43879 | 2.47103  |
| H | 1.30902  | -3.36774 | 4.0389   |
| H | -1.05369 | -3.61342 | 3.20646  |
| N | 0.33768  | -2.1654  | 0.46658  |
| C | 2.44259  | 0.8198   | -0.18432 |
| C | 2.61234  | 2.07615  | -1.17019 |
| C | 3.31449  | 1.34588  | 1.11896  |
| C | 4.04554  | 2.58414  | -0.84723 |
| C | 1.77767  | 3.24945  | -0.55676 |
| C | 3.7932   | 2.76997  | 0.66331  |
| H | 4.27125  | 3.54326  | -1.36225 |
| H | 4.86978  | 1.88221  | -1.07233 |
| H | 1.63046  | 4.03193  | -1.33025 |
| H | 0.77038  | 2.90039  | -0.26014 |
| C | 2.62888  | 3.77663  | 0.63293  |
| H | 4.66528  | 3.11651  | 1.25691  |
| H | 3.01862  | 4.79669  | 0.43172  |
| H | 2.0734   | 3.83497  | 1.58897  |
| C | 4.5745   | 0.49964  | 1.41735  |
| H | 4.32131  | -0.5457  | 1.68366  |
| H | 5.2813   | 0.45439  | 0.56585  |
| H | 5.11721  | 0.94176  | 2.28028  |
| C | 2.47615  | 1.36717  | 2.40207  |
| H | 2.16696  | 0.34419  | 2.69614  |
| H | 3.06807  | 1.79799  | 3.23845  |
| H | 1.55252  | 1.97095  | 2.31561  |
| C | 2.20071  | 1.86063  | -2.62871 |
| H | 1.12178  | 1.60519  | -2.68492 |
| H | 2.35133  | 2.79468  | -3.21098 |
| H | 2.74586  | 1.04918  | -3.14651 |
| C | 3.05306  | -0.51204 | -0.71012 |
| O | 1.07596  | 0.55683  | 0.07471  |
| C | -1.98782 | -2.87051 | 0.73036  |

|    |          |          |          |
|----|----------|----------|----------|
| C  | -2.18575 | -3.14032 | -0.64392 |
| C  | -3.11789 | -2.80685 | 1.57958  |
| C  | -3.47704 | -3.34246 | -1.15322 |
| H  | -1.31457 | -3.20597 | -1.31288 |
| C  | -4.40943 | -3.004   | 1.06696  |
| H  | -2.98917 | -2.56829 | 2.64656  |
| C  | -4.59332 | -3.27551 | -0.30091 |
| H  | -3.61118 | -3.55706 | -2.22499 |
| H  | -5.27883 | -2.9386  | 1.74021  |
| H  | -5.6068  | -3.43362 | -0.70254 |
| Zn | 0.0655   | -0.7573  | -1.17185 |
| C  | -0.04243 | -1.24504 | -3.10164 |
| H  | -1.12629 | -1.36355 | -3.33375 |
| H  | 0.29057  | -0.37769 | -3.71421 |
| C  | -1.79181 | 3.03879  | 0.85038  |
| C  | -1.88448 | 1.38808  | -0.75915 |
| H  | -1.12954 | 1.90306  | -1.39692 |
| Zn | -0.51913 | 1.11718  | 1.2635   |
| O  | -1.60747 | 0.17552  | -0.31764 |
| H  | -2.77007 | 2.73607  | 1.27533  |
| H  | -1.99304 | 3.66409  | -0.0391  |
| C  | -0.91797 | 0.58684  | 3.15392  |
| H  | -0.2811  | 1.20159  | 3.82865  |
| H  | -0.55238 | -0.45755 | 3.2689   |
| C  | -3.29403 | 1.70486  | -1.09397 |
| C  | -3.61248 | 2.80801  | -1.9202  |
| C  | -4.34003 | 0.88108  | -0.6167  |
| C  | -4.94614 | 3.08927  | -2.25376 |
| H  | -2.80148 | 3.44265  | -2.31527 |
| C  | -5.67238 | 1.16464  | -0.94999 |
| H  | -4.07933 | 0.0102   | 0.00375  |
| C  | -5.98101 | 2.27019  | -1.76564 |
| H  | -5.18075 | 3.94832  | -2.90246 |
| H  | -6.48022 | 0.51593  | -0.57481 |
| H  | -7.02866 | 2.49028  | -2.02651 |
| C  | -0.99494 | 3.88562  | 1.8614   |
| H  | -0.00558 | 4.2034   | 1.47399  |
| H  | -1.55324 | 4.82566  | 2.08878  |

|   |          |          |          |
|---|----------|----------|----------|
| H | -0.82704 | 3.37111  | 2.83025  |
| C | -2.38873 | 0.6865   | 3.57912  |
| H | -2.55749 | 0.34218  | 4.62732  |
| H | -2.76924 | 1.72975  | 3.52889  |
| H | -3.05413 | 0.07883  | 2.92877  |
| C | 0.72973  | -2.50264 | -3.53141 |
| H | 0.59295  | -2.74871 | -4.61113 |
| H | 1.82279  | -2.39573 | -3.36302 |
| H | 0.4173   | -3.40815 | -2.96333 |
| H | 0.4173   | -3.40815 | -2.96333 |

### 7.1.2 Lowest TS

TS 0001

E(RB-P86) = -5316.45897960 A.U.

First frequency = -195.3715  $\text{cm}^{-1}$

|   |               |               |               |
|---|---------------|---------------|---------------|
| C | -2.8327465556 | 1.589204044   | -0.0177074342 |
| C | -4.1803275328 | 0.3768567214  | -1.6149795856 |
| C | -4.9065170224 | 1.5342418102  | -1.9314427012 |
| C | -4.6096537335 | 2.7413116433  | -1.2863281482 |
| C | -3.582540569  | 2.7510590716  | -0.335541271  |
| C | -1.7973763958 | 1.8736192671  | 1.0412246471  |
| C | -2.2051343613 | 2.1542609219  | 2.3609606159  |
| C | -1.2674399934 | 2.6677095612  | 3.2703067401  |
| C | 0.039872633   | 2.9124345896  | 2.8385908644  |
| C | 0.3985475526  | 2.6017921913  | 1.5055448715  |
| H | -4.4612868433 | -0.5482833847 | -2.1293915015 |
| H | -5.7082406508 | 1.4828105356  | -2.6852863631 |
| H | -5.1636731765 | 3.6643137282  | -1.5175340917 |
| H | -3.333008833  | 3.6911653724  | 0.1821406223  |
| H | -3.2527416571 | 1.9914496057  | 2.6529081468  |
| H | -1.564543754  | 2.8998000219  | 4.3053045978  |
| H | 0.7818805512  | 3.3642183345  | 3.5119088212  |
| N | -0.5144143454 | 2.0786743865  | 0.6471445286  |
| C | -2.3903532418 | -0.973538996  | -0.3023573886 |
| C | -2.4732472796 | -2.1205231262 | -1.4292403477 |
| C | -3.1753940754 | -1.7209347557 | 0.9431748864  |

|    |               |               |               |
|----|---------------|---------------|---------------|
| C  | -3.8257398876 | -2.8231156397 | -1.1235452027 |
| C  | -1.4949447829 | -3.2558708373 | -0.9894245274 |
| C  | -3.4921523682 | -3.1382322703 | 0.3504058407  |
| H  | -3.9608698406 | -3.7409850113 | -1.7362675036 |
| H  | -4.7337483078 | -2.2034975041 | -1.2467285953 |
| H  | -1.3255532545 | -3.9376850445 | -1.8489797303 |
| H  | -0.5130837113 | -2.8374497938 | -0.7084428618 |
| C  | -2.213595391  | -3.9841871346 | 0.1802291364  |
| H  | -4.2919962969 | -3.6513239506 | 0.9249853946  |
| H  | -2.4849141072 | -5.0250554879 | -0.0946994055 |
| H  | -1.6025539176 | -4.0542072721 | 1.102181764   |
| C  | -4.5167239752 | -1.053720251  | 1.3295911324  |
| H  | -4.3727266844 | -0.0196099499 | 1.7013948335  |
| H  | -5.2368330915 | -0.9980368244 | 0.490326714   |
| H  | -4.9964060116 | -1.6379311639 | 2.1439801663  |
| C  | -2.3263544595 | -1.7703148829 | 2.2175669478  |
| H  | -2.1145834498 | -0.7521515558 | 2.6007330053  |
| H  | -2.8643331923 | -2.3304284674 | 3.0125107168  |
| H  | -1.3491647715 | -2.2733134092 | 2.0788775901  |
| C  | -2.152764651  | -1.69662895   | -2.8650752214 |
| H  | -2.8085451955 | -0.9032703907 | -3.2700576617 |
| H  | -1.1132582293 | -1.3114913787 | -2.9249876189 |
| H  | -2.2218684338 | -2.5718285809 | -3.5458810357 |
| C  | -3.1259742498 | 0.347812397   | -0.6683180763 |
| O  | -1.0465636013 | -0.6259513256 | -0.0251699423 |
| C  | 1.7651671762  | 2.8878020376  | 0.9941482623  |
| C  | 1.952219563   | 3.3399169247  | -0.3326501431 |
| C  | 2.8957746376  | 2.7493311181  | 1.833135026   |
| C  | 3.236139162   | 3.649786811   | -0.8055291017 |
| H  | 1.078663144   | 3.4620495087  | -0.9907259738 |
| C  | 4.1798529241  | 3.0540529524  | 1.3557391293  |
| H  | 2.7718241766  | 2.3638305834  | 2.8571193887  |
| C  | 4.3538208552  | 3.5089195385  | 0.0359663084  |
| H  | 3.3635565651  | 4.0070843744  | -1.8394147823 |
| H  | 5.0516405286  | 2.9289039266  | 2.0174286403  |
| H  | 5.3613922342  | 3.7518164935  | -0.3373050649 |
| Zn | -0.1409211688 | 0.8701866201  | -1.1191334417 |
| C  | -0.0608831539 | 1.5659500851  | -2.9852065487 |

|    |               |               |               |
|----|---------------|---------------|---------------|
| H  | 1.0049199153  | 1.8325617065  | -3.173809828  |
| H  | -0.2791630041 | 0.7355663124  | -3.693452548  |
| C  | 1.6701588005  | -3.0767424125 | 0.5648195286  |
| C  | 1.945929633   | -1.1789850513 | -0.9233027007 |
| H  | 1.2118159258  | -1.6792503    | -1.5956629431 |
| Zn | 0.5733015164  | -1.2037964849 | 1.1312630109  |
| O  | 1.6258014169  | -0.0280507081 | -0.388035001  |
| H  | 1.7041428658  | -3.6012065466 | -0.409585005  |
| H  | 0.7937508464  | -3.5213550776 | 1.0999398277  |
| C  | 1.0361705053  | -0.6929041485 | 3.0169852666  |
| H  | 0.4916729466  | 0.247100364   | 3.2529657256  |
| H  | 2.1155769726  | -0.4203317243 | 2.9861585842  |
| C  | 3.3616269515  | -1.4730930878 | -1.2173261713 |
| C  | 3.7128588998  | -2.5414031679 | -2.0770514936 |
| C  | 4.3864468346  | -0.6610178581 | -0.674771604  |
| C  | 5.0577872655  | -2.8012649058 | -2.3771960684 |
| H  | 2.9187424     | -3.1658041567 | -2.5191914618 |
| C  | 5.7303679227  | -0.9220449586 | -0.9792935594 |
| H  | 4.098461032   | 0.180957433   | -0.0269857478 |
| C  | 6.0713119764  | -1.9934489137 | -1.8268414012 |
| H  | 5.319858003   | -3.6335509364 | -3.0497695884 |
| H  | 6.521967466   | -0.2834141566 | -0.5554395301 |
| H  | 7.1279002458  | -2.1962433621 | -2.0644427818 |
| C  | 2.9387290782  | -3.2795262089 | 1.3810031112  |
| H  | 2.8663919982  | -2.8175247904 | 2.3865171845  |
| H  | 3.1623619529  | -4.3614185807 | 1.5350831729  |
| H  | 3.8314545239  | -2.8434777047 | 0.8852805976  |
| C  | 0.7862827858  | -1.7313850273 | 4.118986474   |
| H  | 1.3134919989  | -2.691468505  | 3.9263515428  |
| H  | 1.1290426601  | -1.3825224874 | 5.1220565927  |
| H  | -0.2912472154 | -1.9806770556 | 4.2268391381  |
| C  | -0.9691127431 | 2.764378048   | -3.3036228789 |
| H  | -0.8481921849 | 3.1360182627  | -4.348747475  |
| H  | -2.044450636  | 2.5159072829  | -3.1743637594 |
| H  | -0.7716039816 | 3.6346486927  | -2.6375940563 |
| H  | -0.7716039816 | 3.6346486927  | -2.6375940563 |



### 7.1.3 Additional TS

TS 0006

E(RB-P86) = -5316.45832710 A.U.

First frequency = -194.0450 cm<sup>-1</sup>

|   |               |               |               |
|---|---------------|---------------|---------------|
| C | -2.8214311262 | 1.6113218329  | 0.1602875444  |
| C | -4.2703090101 | 0.5599501643  | -1.461614431  |
| C | -4.9531851206 | 1.7645451192  | -1.6820241498 |
| C | -4.5799117249 | 2.9163043062  | -0.977506633  |
| C | -3.5255560166 | 2.822966622   | -0.0617854467 |
| C | -1.741184116  | 1.7890976502  | 1.1990125326  |
| C | -2.0870042092 | 1.9380347876  | 2.5564790071  |
| C | -1.1114794766 | 2.3904002895  | 3.4587168871  |
| C | 0.1601928593  | 2.7243022718  | 2.9828117937  |
| C | 0.4581821817  | 2.5465767409  | 1.6107854444  |
| H | -4.6058254562 | -0.3186048766 | -2.023276499  |
| H | -5.7802304885 | 1.7947784526  | -2.4092163427 |
| H | -5.0983181642 | 3.8750130808  | -1.1344630116 |
| H | -3.2192795965 | 3.7169395253  | 0.505024503   |
| H | -3.1151823829 | 1.7272249541  | 2.8843075594  |
| H | -1.3556808659 | 2.5172541368  | 4.5252949694  |
| H | 0.915336981   | 3.1489266332  | 3.6585190014  |
| N | -0.4834362586 | 2.0548705599  | 0.7620568033  |
| C | -2.4762770746 | -0.9320591821 | -0.316338416  |
| C | -2.6037249734 | -1.9727400239 | -1.5406651395 |
| C | -3.253831464  | -1.7719780149 | 0.8732266475  |
| C | -3.958347936  | -2.6837339362 | -1.2661187719 |
| C | -1.6328268025 | -3.1539805836 | -1.2297050933 |
| C | -3.5972208019 | -3.1289800047 | 0.1666902638  |
| H | -4.1179972854 | -3.5429664083 | -1.953472387  |
| H | -4.8612357653 | -2.0465949293 | -1.3148160996 |
| H | -1.5025715652 | -3.763670524  | -2.1482356117 |
| H | -0.6364333629 | -2.7734493035 | -0.9472226203 |
| C | -2.330534199  | -3.9675951647 | -0.1037902089 |
| H | -4.3896376664 | -3.6838257211 | 0.7120631848  |
| H | -2.6172798556 | -4.9814795019 | -0.4536381566 |
| H | -1.6985768124 | -4.1158891634 | 0.7948941362  |
| C | -4.5804829341 | -1.1195147145 | 1.3303713434  |

|    |               |               |               |
|----|---------------|---------------|---------------|
| H  | -4.4155022508 | -0.1214409123 | 1.7836312676  |
| H  | -5.3095607861 | -0.9836680224 | 0.5083334211  |
| H  | -5.0597023088 | -1.7616149336 | 2.1001876337  |
| C  | -2.3969432209 | -1.9441737663 | 2.1320913811  |
| H  | -2.173060938  | -0.9673731869 | 2.6045913589  |
| H  | -2.9384160259 | -2.5656831236 | 2.8776017996  |
| H  | -1.4271034728 | -2.4449375691 | 1.9454108078  |
| C  | -2.3147322603 | -1.4268561247 | -2.9410287435 |
| H  | -2.9785339296 | -0.6014008176 | -3.2595463344 |
| H  | -1.2750171037 | -1.0409490847 | -2.9928800094 |
| H  | -2.4043785859 | -2.2402087261 | -3.6924667991 |
| C  | -3.1869065314 | 0.4296822979  | -0.5571848115 |
| O  | -1.1204953972 | -0.6331596801 | -0.0364049264 |
| C  | 1.7706230166  | 2.9633545371  | 1.0451108977  |
| C  | 1.8661866484  | 3.3771999325  | -0.3046073519 |
| C  | 2.9357267984  | 3.0129395624  | 1.8480662278  |
| C  | 3.0874661065  | 3.8179822362  | -0.8354080354 |
| H  | 0.9669052225  | 3.3628567728  | -0.9376804727 |
| C  | 4.1577238809  | 3.4508205708  | 1.3148391273  |
| H  | 2.8969322391  | 2.6811147701  | 2.8966208624  |
| C  | 4.2388958162  | 3.8554882229  | -0.0295096303 |
| H  | 3.1375237405  | 4.1389568299  | -1.8876999398 |
| H  | 5.0544913229  | 3.4707756453  | 1.9542233955  |
| H  | 5.1979102876  | 4.2003516497  | -0.4475888385 |
| Zn | -0.1938107868 | 0.8970050782  | -1.0659544512 |
| C  | -0.2421871582 | 1.6722817747  | -2.9043345428 |
| H  | -1.2567272735 | 1.5028281327  | -3.3287069027 |
| H  | -0.1568569964 | 2.780010019   | -2.8114616487 |
| C  | 1.4982925767  | -3.1594078753 | 0.344605171   |
| C  | 1.9296622057  | -1.1457586454 | -0.9175122007 |
| H  | 1.2668474808  | -1.5843378439 | -1.697363615  |
| Zn | 0.4939695956  | -1.2916184752 | 1.0799568768  |
| O  | 1.5606962145  | -0.0262504859 | -0.3412650468 |
| H  | 1.6126717417  | -3.5578860114 | -0.6812657344 |
| H  | 0.542432205   | -3.6024049684 | 0.7175142893  |
| C  | 0.830580193   | -1.0042420611 | 3.0359591911  |
| H  | 0.5791327247  | -1.963526503  | 3.5442961657  |
| H  | 0.0721303824  | -0.2709675567 | 3.3897074731  |

|   |              |               |               |
|---|--------------|---------------|---------------|
| C | 3.3687662652 | -1.4335817787 | -1.0825625588 |
| C | 3.8062903944 | -2.4230070767 | -1.9953900831 |
| C | 4.3329531167 | -0.6950777107 | -0.3558043568 |
| C | 5.1745401518 | -2.676280932  | -2.1701019511 |
| H | 3.0624941256 | -2.9892754608 | -2.580277551  |
| C | 5.7006958583 | -0.9496155021 | -0.5338990262 |
| H | 3.9823792978 | 0.08660735    | 0.3348855527  |
| C | 6.1264295809 | -1.9416317266 | -1.4376796581 |
| H | 5.5034432579 | -3.4457379967 | -2.8866756067 |
| H | 6.4441213979 | -0.3677806095 | 0.0342554366  |
| H | 7.2014221061 | -2.139488091  | -1.576068502  |
| C | 2.6530979881 | -3.55460236   | 1.2529344203  |
| H | 2.4399201078 | -3.3225911854 | 2.3160805045  |
| H | 2.8688646516 | -4.6471732414 | 1.1936429915  |
| H | 3.5986894326 | -3.0357529044 | 0.9839536602  |
| C | 2.2356635941 | -0.5454893883 | 3.4468199347  |
| H | 2.3366660682 | -0.4000524165 | 4.5490717464  |
| H | 3.0194196591 | -1.2749410709 | 3.1514637119  |
| H | 2.5139857157 | 0.4166498981  | 2.967479008   |
| C | 0.8306396369 | 1.151222472   | -3.8751640271 |
| H | 0.7867123785 | 1.6406577514  | -4.8767585386 |
| H | 1.8600489147 | 1.3107356939  | -3.4865228807 |
| H | 0.732654532  | 0.0580284535  | -4.0588067224 |
| H | 0.732654532  | 0.0580284535  | -4.0588067224 |

TS 0013

E(RB-P86) = -5316.45195477 A.U.

First frequency = -197.8771  $\text{cm}^{-1}$

|   |               |              |               |
|---|---------------|--------------|---------------|
| C | -2.8138997459 | 1.6098724533 | 0.0034575158  |
| C | -4.1525523669 | 0.4381864119 | -1.6301492249 |
| C | -4.834439459  | 1.6172128907 | -1.9649681813 |
| C | -4.5187874102 | 2.8149712564 | -1.311659688  |
| C | -3.5185215721 | 2.7939812612 | -0.3326120692 |
| C | -1.788250874  | 1.8636682481 | 1.0799774277  |
| C | -2.2010038013 | 2.1225442043 | 2.4020418247  |
| C | -1.262467969  | 2.6130553913 | 3.3233963705  |
| C | 0.0460588041  | 2.8632028883 | 2.8992084284  |

|   |               |               |               |
|---|---------------|---------------|---------------|
| C | 0.4086240733  | 2.5787739135  | 1.5610913136  |
| H | -4.4444566182 | -0.4766000673 | -2.1565286641 |
| H | -5.6158590335 | 1.590244304   | -2.7410871977 |
| H | -5.0386835908 | 3.7540273199  | -1.5572820248 |
| H | -3.2549854532 | 3.7257934151  | 0.1932518783  |
| H | -3.2509996267 | 1.9625079862  | 2.6867844266  |
| H | -1.5608841274 | 2.8273432094  | 4.3618657467  |
| H | 0.7842007279  | 3.3035899687  | 3.5839689769  |
| N | -0.5032908049 | 2.068801309   | 0.6930870538  |
| C | -2.420215508  | -0.9578253478 | -0.2805044291 |
| C | -2.5123571839 | -2.1033999197 | -1.4040435062 |
| C | -3.2324391494 | -1.6863570327 | 0.9586847278  |
| C | -3.8947720493 | -2.7575035448 | -1.1264496407 |
| C | -1.5786568548 | -3.2670294506 | -0.9368085576 |
| C | -3.6014347821 | -3.0861637816 | 0.3526087755  |
| H | -4.0527077833 | -3.6700208831 | -1.7417060742 |
| H | -4.7763559387 | -2.1044561182 | -1.266232325  |
| H | -1.3945971101 | -3.9488761494 | -1.793324431  |
| H | -0.5932961036 | -2.8740935177 | -0.6230326105 |
| C | -2.3575610077 | -3.9817219888 | 0.2037155022  |
| H | -4.43170285   | -3.5670461425 | 0.9116292143  |
| H | -2.6645064575 | -5.0059848876 | -0.0956679377 |
| H | -1.7776368835 | -4.0874884154 | 1.140248396   |
| C | -4.5507856769 | -0.9767682863 | 1.3473792161  |
| H | -4.3754692468 | 0.0522092981  | 1.7194287905  |
| H | -5.2684912308 | -0.8990258711 | 0.5075245325  |
| H | -5.0483550192 | -1.5461739515 | 2.1615924529  |
| C | -2.3853598278 | -1.7779010484 | 2.2340658579  |
| H | -2.1762801323 | -0.7717580804 | 2.6488401883  |
| H | -2.9261540959 | -2.3613660755 | 3.0102193324  |
| H | -1.405626595  | -2.2718053201 | 2.0814585237  |
| C | -2.143433843  | -1.6892119356 | -2.8308191833 |
| H | -2.7803436323 | -0.8925673175 | -3.2585131713 |
| H | -1.0990026107 | -1.3122587838 | -2.8586732747 |
| H | -2.1978653426 | -2.5661462412 | -3.5105743547 |
| C | -3.1247070419 | 0.3784026102  | -0.6568474496 |
| O | -1.0715763759 | -0.6310945538 | -0.0013738505 |
| C | 1.7708731071  | 2.8931604061  | 1.0530076767  |

|    |               |               |               |
|----|---------------|---------------|---------------|
| C  | 1.9555222476  | 3.3091382928  | -0.2863517085 |
| C  | 2.898382787   | 2.8316519413  | 1.9059184162  |
| C  | 3.2300878355  | 3.6582272164  | -0.756704639  |
| H  | 1.0853754966  | 3.3700663552  | -0.9572957927 |
| C  | 4.1736892768  | 3.1764281845  | 1.4318890758  |
| H  | 2.7823915378  | 2.4801344642  | 2.9428982289  |
| C  | 4.3435266258  | 3.5949241678  | 0.0998109329  |
| H  | 3.3534346283  | 3.9854948469  | -1.8009341418 |
| H  | 5.0418435783  | 3.1119585515  | 2.1068851113  |
| H  | 5.3437716205  | 3.8692103446  | -0.2712271741 |
| Zn | -0.1766784266 | 0.8757127627  | -1.1073166863 |
| C  | -0.2720048681 | 1.607759321   | -2.9585683552 |
| H  | -1.2868919733 | 1.3979302886  | -3.364474465  |
| H  | -0.2188515744 | 2.7192813012  | -2.8878310385 |
| C  | 2.0042540101  | -2.9355587309 | 0.5616844754  |
| C  | 1.9871203109  | -1.1360428485 | -0.9209815852 |
| H  | 1.3133276437  | -1.6735803887 | -1.6267754372 |
| Zn | 0.5704279171  | -1.1995317197 | 1.1107069699  |
| O  | 1.5714572646  | -0.006339173  | -0.3883063443 |
| H  | 2.8356841357  | -2.5608755451 | 1.1957338026  |
| H  | 2.4610938147  | -3.3885290782 | -0.3361533592 |
| C  | 1.0190501918  | -0.6745528356 | 2.9943403035  |
| H  | 0.2119023894  | 0.0144949576  | 3.3266395499  |
| H  | 1.9331622494  | -0.0470143109 | 2.8898011413  |
| C  | 3.435202095   | -1.2791063023 | -1.2076951293 |
| C  | 3.8987783359  | -2.2446410493 | -2.132244441  |
| C  | 4.3716223572  | -0.4237311483 | -0.5822210529 |
| C  | 5.2671298541  | -2.3589383145 | -2.4200163972 |
| H  | 3.173145115   | -2.9029507033 | -2.6390819283 |
| C  | 5.7396986958  | -0.5424424982 | -0.8682734143 |
| H  | 3.9994676146  | 0.3408187541  | 0.11647992    |
| C  | 6.1928956182  | -1.5102290059 | -1.7847673314 |
| H  | 5.61473741    | -3.1101360886 | -3.1471181096 |
| H  | 6.4614861752  | 0.1289870729  | -0.3759736398 |
| H  | 7.26794113    | -1.5999945008 | -2.008938058  |
| C  | 1.1914578649  | -4.0315766055 | 1.2731289205  |
| H  | 0.7006820747  | -3.6951341824 | 2.210451121   |
| H  | 0.4069810962  | -4.462667781  | 0.619572457   |

|   |              |               |               |
|---|--------------|---------------|---------------|
| H | 1.860580677  | -4.8795840439 | 1.5565768854  |
| C | 1.2525133881 | -1.7599485668 | 4.0506754522  |
| H | 1.527506541  | -1.3338608293 | 5.0446499062  |
| H | 0.3491989971 | -2.3864573511 | 4.2200054236  |
| H | 2.074798882  | -2.4527882281 | 3.7695256301  |
| C | 0.8034472593 | 1.0980536981  | -3.9322014361 |
| H | 0.730597862  | 1.562149771   | -4.9442418415 |
| H | 1.8324709938 | 1.2986583241  | -3.562159898  |
| H | 0.7381595554 | -0.0016325798 | -4.088583003  |
| H | 0.7381595554 | -0.0016325798 | -4.088583003  |

## 7.2 26 *anti pro-S*

### 7.2.1 Starting TS

TS input

E(RB-P86) = -5316.44652052 A.U.

First frequency = -196.4149 cm<sup>-1</sup>

|   |          |          |          |
|---|----------|----------|----------|
| C | 2.36871  | -1.87145 | -0.66832 |
| C | 3.61798  | -0.43929 | -2.15919 |
| C | 4.1376   | -1.54913 | -2.84209 |
| C | 3.79392  | -2.84347 | -2.43286 |
| C | 2.91373  | -2.98678 | -1.3537  |
| C | 1.4296   | -2.29862 | 0.43081  |
| C | 1.93062  | -2.92643 | 1.58853  |
| C | 1.02999  | -3.5354  | 2.47626  |
| C | -0.33489 | -3.53413 | 2.17228  |
| C | -0.78288 | -2.88559 | 0.99695  |
| H | 3.93361  | 0.55185  | -2.50116 |
| H | 4.81795  | -1.39172 | -3.69416 |
| H | 4.19244  | -3.73079 | -2.94877 |
| H | 2.61712  | -3.9962  | -1.02637 |
| H | 3.01483  | -2.95048 | 1.77053  |
| H | 1.39696  | -4.03417 | 3.38725  |
| H | -1.05684 | -4.05505 | 2.81699  |
| N | 0.09804  | -2.26728 | 0.16898  |
| C | 2.27341  | 0.70811  | -0.25133 |

|   |          |          |          |
|---|----------|----------|----------|
| C | 2.40056  | 2.10234  | -1.03608 |
| C | 3.33605  | 0.97078  | 0.98965  |
| C | 3.89177  | 2.49018  | -0.82763 |
| C | 1.72471  | 3.18961  | -0.13855 |
| C | 3.8393   | 2.43162  | 0.71346  |
| H | 4.10929  | 3.51207  | -1.20759 |
| H | 4.63841  | 1.80359  | -1.26784 |
| H | 1.53129  | 4.09594  | -0.74936 |
| H | 0.7428   | 2.83528  | 0.22022  |
| C | 2.74319  | 3.47412  | 0.99994  |
| H | 4.79779  | 2.63727  | 1.23486  |
| H | 3.16702  | 4.49721  | 0.91977  |
| H | 2.31104  | 3.39344  | 2.01666  |
| C | 4.57103  | 0.03877  | 0.97235  |
| H | 4.29259  | -1.02627 | 1.09725  |
| H | 5.15987  | 0.11179  | 0.03732  |
| H | 5.24418  | 0.30892  | 1.81403  |
| C | 2.67432  | 0.80256  | 2.36041  |
| H | 2.33721  | -0.24175 | 2.51638  |
| H | 3.39517  | 1.05426  | 3.16775  |
| H | 1.7886   | 1.45128  | 2.51004  |
| C | 1.7961   | 2.15161  | -2.44168 |
| H | 0.70159  | 1.9776   | -2.38601 |
| H | 1.94678  | 3.15775  | -2.8877  |
| H | 2.20455  | 1.40386  | -3.14708 |
| C | 2.73274  | -0.54236 | -1.05725 |
| O | 0.93363  | 0.46053  | 0.14749  |
| C | -2.21841 | -2.91169 | 0.61013  |
| C | -3.23556 | -2.87275 | 1.59231  |
| C | -2.5894  | -3.0154  | -0.75056 |
| C | -4.58784 | -2.92982 | 1.22191  |
| H | -2.9659  | -2.75682 | 2.65368  |
| C | -3.9418  | -3.07914 | -1.11791 |
| H | -1.80556 | -3.05846 | -1.52187 |
| C | -4.94571 | -3.03573 | -0.13418 |
| H | -5.36857 | -2.88248 | 1.99767  |
| H | -4.21326 | -3.16559 | -2.18179 |
| H | -6.00745 | -3.0823  | -0.42419 |

|    |          |          |          |
|----|----------|----------|----------|
| Zn | -0.30293 | -0.56783 | -1.16214 |
| C  | -0.59113 | -0.8199  | -3.12209 |
| H  | -1.69385 | -0.87505 | -3.27457 |
| H  | -0.26617 | 0.09308  | -3.67013 |
| C  | -1.52934 | 2.94756  | 1.42862  |
| C  | -2.55586 | 1.07218  | 0.40509  |
| H  | -3.19599 | 0.9863   | 1.31241  |
| Zn | -0.38205 | 0.90704  | 1.65792  |
| O  | -1.76951 | 0.06353  | 0.1672   |
| H  | -1.16424 | 3.44125  | 0.50427  |
| H  | -2.60953 | 3.17203  | 1.49823  |
| C  | -0.77915 | 0.07791  | 3.44855  |
| H  | -1.85201 | 0.32993  | 3.6177   |
| H  | -0.75497 | -1.02275 | 3.28388  |
| C  | -3.14436 | 1.90325  | -0.67203 |
| C  | -2.55476 | 2.00224  | -1.95318 |
| C  | -4.34527 | 2.61083  | -0.42172 |
| C  | -3.1487  | 2.78515  | -2.95368 |
| H  | -1.62816 | 1.44721  | -2.16294 |
| C  | -4.94031 | 3.39326  | -1.42225 |
| H  | -4.82166 | 2.53074  | 0.56988  |
| C  | -4.3423  | 3.48428  | -2.69278 |
| H  | -2.67747 | 2.84852  | -3.94735 |
| H  | -5.87822 | 3.93201  | -1.21288 |
| H  | -4.8078  | 4.09792  | -3.48054 |
| C  | 0.08612  | -2.05221 | -3.74295 |
| H  | 1.193    | -1.99615 | -3.67287 |
| H  | -0.20784 | -2.99897 | -3.23604 |
| H  | -0.16275 | -2.18383 | -4.82238 |
| C  | 0.03639  | 0.42934  | 4.69889  |
| H  | 0.04575  | 1.52121  | 4.9073   |
| H  | -0.35973 | -0.06253 | 5.61898  |
| H  | 1.09869  | 0.11665  | 4.61037  |
| C  | -0.85704 | 3.50947  | 2.69387  |
| H  | -1.23079 | 3.01979  | 3.61705  |
| H  | 0.24996  | 3.40811  | 2.69899  |
| H  | -1.06835 | 4.60126  | 2.80229  |
| H  | -1.06835 | 4.60126  | 2.80229  |



## 7.2.2 Lowest TS

TS 0001

E(RB-P86) = -5316.45414105 A.U.

First frequency = -194.2597 cm<sup>-1</sup>

|   |               |               |               |
|---|---------------|---------------|---------------|
| C | 2.6155879893  | -1.6406094672 | -0.4032922771 |
| C | 3.8892633883  | -0.1781162694 | -1.8446579621 |
| C | 4.5747396383  | -1.266797377  | -2.4022171738 |
| C | 4.2956124129  | -2.5658056154 | -1.958884148  |
| C | 3.3257615417  | -2.7339854123 | -0.9640673578 |
| C | 1.6380128486  | -2.1013278132 | 0.6485549751  |
| C | 2.1242653353  | -2.6249537912 | 1.8639875567  |
| C | 1.2379565481  | -3.2935642192 | 2.7220510174  |
| C | -0.0984984561 | -3.4444258625 | 2.3394961726  |
| C | -0.5361490568 | -2.884558766  | 1.1161547397  |
| H | 4.1558178198  | 0.8213611     | -2.204747375  |
| H | 5.3313495902  | -1.0899937427 | -3.1832246323 |
| H | 4.8191114463  | -3.4382326575 | -2.3798401442 |
| H | 3.0897759282  | -3.7484273929 | -0.6046530005 |
| H | 3.1914250411  | -2.5256657473 | 2.1103828987  |
| H | 1.5961863806  | -3.7168015576 | 3.6738442627  |
| H | -0.8046493603 | -4.0098536991 | 2.9638053783  |
| N | 0.3285674334  | -2.2166326163 | 0.309156604   |
| C | 2.2189663753  | 0.9400285059  | -0.2058810649 |
| C | 2.2154828759  | 2.2505236782  | -1.1463852487 |
| C | 3.1267101567  | 1.4829650462  | 1.0608864348  |
| C | 3.5841007895  | 2.9204105931  | -0.8402183456 |
| C | 1.2697017761  | 3.2851913191  | -0.4619343076 |
| C | 3.3724373732  | 2.9851788527  | 0.6865518419  |
| H | 3.6585677324  | 3.9278315311  | -1.3045775485 |
| H | 4.4839840325  | 2.350112352   | -1.1384051332 |
| H | 1.0477357815  | 4.1000575255  | -1.1820681696 |
| H | 0.3053599534  | 2.8169296937  | -0.1976997189 |
| C | 2.0718695545  | 3.8143471069  | 0.7607446659  |
| H | 4.2108484859  | 3.4195939669  | 1.2709787449  |
| H | 2.3079084013  | 4.8939135133  | 0.6543780199  |
| H | 1.5348503282  | 3.7092682396  | 1.7247566891  |
| C | 4.501423481   | 0.783669373   | 1.1883929154  |

|    |               |               |               |
|----|---------------|---------------|---------------|
| H  | 4.3944224498  | -0.2992018352 | 1.4003421901  |
| H  | 5.1284799775  | 0.8746476721  | 0.280898903   |
| H  | 5.0660256733  | 1.2359390773  | 2.0316530413  |
| C  | 2.4256609643  | 1.3007156967  | 2.4105856014  |
| H  | 2.2269428001  | 0.2315472164  | 2.6242927586  |
| H  | 3.0651883075  | 1.6995226494  | 3.2270512775  |
| H  | 1.4575225258  | 1.8350156244  | 2.4844354472  |
| C  | 1.7981211171  | 2.0538131087  | -2.605504409  |
| H  | 0.7634315453  | 1.6577180568  | -2.6544922802 |
| H  | 1.8042942898  | 3.0291618974  | -3.137154543  |
| H  | 2.4351097847  | 1.3536694295  | -3.1777433865 |
| C  | 2.8943002433  | -0.3075921581 | -0.8431637837 |
| O  | 0.8998998879  | 0.5570961953  | 0.1447614186  |
| C  | -1.9397712001 | -3.0606644714 | 0.657389698   |
| C  | -3.009685062  | -3.0586219392 | 1.5827200451  |
| C  | -2.2233327175 | -3.2723264447 | -0.7115854238 |
| C  | -4.329109848  | -3.257005715  | 1.1481035882  |
| H  | -2.8094945306 | -2.8621217828 | 2.6476742894  |
| C  | -3.5426575819 | -3.4772669731 | -1.142738873  |
| H  | -1.3967616845 | -3.2889446462 | -1.4377884399 |
| C  | -4.5999090589 | -3.4693487851 | -0.215705085  |
| H  | -5.1532855528 | -3.2369906569 | 1.878785689   |
| H  | -3.7455718934 | -3.6472790464 | -2.2118448523 |
| H  | -5.635734984  | -3.6270611497 | -0.5559877787 |
| Zn | -0.1579813929 | -0.6495589487 | -1.1482257474 |
| C  | -0.3310873146 | -1.0884553068 | -3.0887362464 |
| H  | -1.4114478136 | -1.2942625779 | -3.2696500866 |
| H  | -0.099694039  | -0.1926252412 | -3.7073518685 |
| C  | -1.630250206  | 2.836528707   | 1.4583968702  |
| C  | -2.5761442424 | 0.9640238042  | 0.1931170123  |
| H  | -3.2670182974 | 0.9136442325  | 1.0649138776  |
| Zn | -0.4940527313 | 0.9055534973  | 1.6212588154  |
| O  | -1.7632015078 | -0.0329951092 | 0.0398891506  |
| H  | -1.7426771092 | 3.4360771082  | 0.5353644624  |
| H  | -0.6576096142 | 3.1648564066  | 1.9066637147  |
| C  | -0.7800874276 | 0.0596705003  | 3.422455606   |
| H  | -1.8647666207 | -0.1963345607 | 3.452787765   |
| H  | -0.2430607514 | -0.9137195797 | 3.4366772042  |

|   |               |               |               |
|---|---------------|---------------|---------------|
| C | -3.0770174358 | 1.7788630064  | -0.9368848904 |
| C | -2.3877642139 | 1.8541423204  | -2.170246993  |
| C | -4.2986654138 | 2.4828768147  | -0.7992190622 |
| C | -2.8966380633 | 2.6213069001  | -3.2269779248 |
| H | -1.4489440662 | 1.2940732188  | -2.2953164094 |
| C | -4.8069344043 | 3.2521840737  | -1.8565073078 |
| H | -4.8608574026 | 2.4096804091  | 0.145697017   |
| C | -4.1059064027 | 3.3264640392  | -3.0740022976 |
| H | -2.3473459516 | 2.6676293024  | -4.180678327  |
| H | -5.7604028927 | 3.7903292723  | -1.7340352152 |
| H | -4.5048261518 | 3.9279688955  | -3.9063563528 |
| C | 0.5211246161  | -2.2722173957 | -3.5743453352 |
| H | 1.6085081812  | -2.0682442752 | -3.4741433354 |
| H | 0.3278317668  | -3.2017321681 | -2.9924819744 |
| H | 0.3377894866  | -2.5273712495 | -4.6446754496 |
| C | -0.4036103812 | 0.8782254617  | 4.6654986087  |
| H | 0.6847103997  | 1.1004389761  | 4.7085190493  |
| H | -0.9247438614 | 1.860139578   | 4.7021221806  |
| H | -0.6532416434 | 0.3555487326  | 5.6195556695  |
| C | -2.7464659281 | 3.0836691554  | 2.464825451   |
| H | -2.632258709  | 2.4605825716  | 3.3767897906  |
| H | -2.7880199465 | 4.1461561254  | 2.8015538545  |
| H | -3.7516405167 | 2.8593214054  | 2.0463537606  |
| H | -3.7516405167 | 2.8593214054  | 2.0463537606  |

### 7.2.3 Additional TS

TS 0006

$E(\text{RB-P86}) = -5316.44916854 \text{ A.U.}$

First frequency =  $-182.2373 \text{ cm}^{-1}$

|   |              |               |               |
|---|--------------|---------------|---------------|
| C | 2.618205329  | -1.7504907397 | -0.4108070733 |
| C | 3.9217758053 | -0.3073680883 | -1.8454498033 |
| C | 4.5635841654 | -1.4104750756 | -2.4269818497 |
| C | 4.2475335638 | -2.706184338  | -1.9987413968 |
| C | 3.2832070828 | -2.858461717  | -0.995556173  |
| C | 1.6322847397 | -2.1828479775 | 0.6447698294  |
| C | 2.0990243133 | -2.7017598248 | 1.869034419   |

|   |               |               |               |
|---|---------------|---------------|---------------|
| C | 1.1856756835  | -3.3143400866 | 2.7409062302  |
| C | -0.1543624465 | -3.4258247372 | 2.3578539176  |
| C | -0.5675914139 | -2.8872772655 | 1.1167830921  |
| H | 4.216059449   | 0.6883265825  | -2.194743355  |
| H | 5.3156909633  | -1.2475938127 | -3.2153331838 |
| H | 4.7377118147  | -3.5884352637 | -2.4389096441 |
| H | 3.0171965936  | -3.8697158069 | -0.6481506572 |
| H | 3.1687397014  | -2.6372424067 | 2.1156448071  |
| H | 1.5254736856  | -3.7270873296 | 3.7039851431  |
| H | -0.880593413  | -3.9503916731 | 2.9945505428  |
| N | 0.3217932949  | -2.2638633839 | 0.3009300936  |
| C | 2.3105903746  | 0.8332372315  | -0.1597447897 |
| C | 2.3576533778  | 2.1702278329  | -1.0538713124 |
| C | 3.2423095195  | 1.2979821384  | 1.1234502795  |
| C | 3.75924707    | 2.7649528258  | -0.7426155479 |
| C | 1.4687409365  | 3.2228811666  | -0.3225435842 |
| C | 3.5636278319  | 2.7954480479  | 0.7880654446  |
| H | 3.8794168048  | 3.7807990971  | -1.1781495533 |
| H | 4.6273515705  | 2.1598124783  | -1.0653378486 |
| H | 1.2669671279  | 4.0656535838  | -1.0159698775 |
| H | 0.4907763807  | 2.7848323442  | -0.0533895292 |
| C | 2.3082284508  | 3.6856177724  | 0.9009727004  |
| H | 4.4286206639  | 3.1683305547  | 1.3761839605  |
| H | 2.5953989543  | 4.7545278863  | 0.8151083626  |
| H | 1.7779208539  | 3.5823402785  | 1.8684832633  |
| C | 4.5828230951  | 0.532167066   | 1.2317359259  |
| H | 4.427537043   | -0.5504916844 | 1.4113301984  |
| H | 5.2154398129  | 0.622103003   | 0.3278364627  |
| H | 5.165017224   | 0.9333790323  | 2.0887522871  |
| C | 2.5320418921  | 1.117695714   | 2.4690864004  |
| H | 2.3084788961  | 0.0514140747  | 2.6700753273  |
| H | 3.1782179102  | 1.492596729   | 3.2917909027  |
| H | 1.5733310842  | 1.667874857   | 2.5446150058  |
| C | 1.9061222681  | 2.0388283763  | -2.5102170829 |
| H | 0.848061016   | 1.7066880275  | -2.549126889  |
| H | 1.9616242032  | 3.0257253936  | -3.0170725451 |
| H | 2.490330539   | 1.3170983665  | -3.1114059663 |
| C | 2.9369521067  | -0.4207121352 | -0.8325418342 |

|    |               |               |               |
|----|---------------|---------------|---------------|
| O  | 0.9753962337  | 0.4895760171  | 0.1729811759  |
| C  | -1.9699220931 | -3.0421363069 | 0.6461910933  |
| C  | -3.0492864022 | -3.0293300942 | 1.5605228014  |
| C  | -2.2437343642 | -3.2475062275 | -0.7259668019 |
| C  | -4.3669056543 | -3.2099678795 | 1.112727002   |
| H  | -2.8584410249 | -2.8400897466 | 2.6284441355  |
| C  | -3.5611969661 | -3.434050523  | -1.1706748412 |
| H  | -1.4102750374 | -3.2733197145 | -1.4439963518 |
| C  | -4.6275067034 | -3.415075996  | -0.2541550209 |
| H  | -5.1975567334 | -3.1823784983 | 1.8358056396  |
| H  | -3.7556953114 | -3.5986187811 | -2.2421877965 |
| H  | -5.6618755336 | -3.5587302089 | -0.604852504  |
| Zn | -0.107813374  | -0.6673403465 | -1.1461073514 |
| C  | -0.3010368314 | -1.0441700481 | -3.0967100938 |
| H  | -1.3839301631 | -1.2366357155 | -3.2769394069 |
| H  | -0.0662148602 | -0.1290637966 | -3.6854977912 |
| C  | -1.6361041431 | 2.8460152691  | 1.5503736473  |
| C  | -2.5801571134 | 0.8687192099  | 0.2451416633  |
| H  | -3.2029283404 | 0.7964177659  | 1.1645134051  |
| Zn | -0.4343516351 | 0.9156665208  | 1.604458395   |
| O  | -1.6943110916 | -0.0584749841 | 0.0695176718  |
| H  | -0.7299115796 | 3.0762339843  | 2.1689824885  |
| H  | -2.4510313799 | 2.6842352632  | 2.2863185056  |
| C  | -0.7302414516 | 0.1241241602  | 3.4304850813  |
| H  | -1.7370800533 | -0.3535362214 | 3.3962924631  |
| H  | -0.0072740416 | -0.7090333964 | 3.5761814668  |
| C  | -3.2112275585 | 1.6031629241  | -0.8631561598 |
| C  | -2.6090459053 | 1.7050877218  | -2.1400628741 |
| C  | -4.4838360707 | 2.1928443115  | -0.6596431342 |
| C  | -3.2611623631 | 2.3808799853  | -3.1803861291 |
| H  | -1.6276251261 | 1.2371413857  | -2.3096817219 |
| C  | -5.1379726545 | 2.8629987594  | -1.7032613239 |
| H  | -4.9622382287 | 2.1103566546  | 0.3304936944  |
| C  | -4.5266820832 | 2.9613188134  | -2.9674030519 |
| H  | -2.7812448425 | 2.4530640085  | -4.1692742064 |
| H  | -6.1302964679 | 3.31015618    | -1.533091371  |
| H  | -5.0379212236 | 3.4885608544  | -3.788607409  |
| C  | 0.5374429382  | -2.2184249529 | -3.6276720332 |

|   |               |               |               |
|---|---------------|---------------|---------------|
| H | 1.6272298341  | -2.0308024606 | -3.5224680374 |
| H | 0.3336862349  | -3.166316679  | -3.0804296909 |
| H | 0.3490479103  | -2.4310423013 | -4.7063709027 |
| C | -0.6567478351 | 1.0992231565  | 4.6134716413  |
| H | -1.3917218819 | 1.9285733553  | 4.5207301136  |
| H | -0.856878036  | 0.6093723309  | 5.5963390988  |
| H | 0.3446939748  | 1.5761198193  | 4.702718338   |
| C | -1.9069991363 | 4.03851861    | 0.6431118691  |
| H | -2.9044962774 | 3.9903060837  | 0.1623768549  |
| H | -1.8788323598 | 5.0013880516  | 1.2073425725  |
| H | -1.16281108   | 4.1320869736  | -0.1750291769 |
| H | -1.16281108   | 4.1320869736  | -0.1750291769 |

TS 0014

E(RB-P86) = -5316.44762602 A.U.

First frequency = -197.1820 cm<sup>-1</sup>

|   |               |               |               |
|---|---------------|---------------|---------------|
| C | 2.595702856   | -1.6050790062 | -0.4938119242 |
| C | 3.8011892235  | -0.1151230484 | -1.963601338  |
| C | 4.3729060909  | -1.2004445043 | -2.6446958143 |
| C | 4.0688337938  | -2.5098152391 | -2.2520432381 |
| C | 3.1883231219  | -2.6947651966 | -1.1789085867 |
| C | 1.6732328348  | -2.0682071382 | 0.6062139332  |
| C | 2.2005982627  | -2.587344769  | 1.8046452388  |
| C | 1.3346982315  | -3.2226380864 | 2.7080036004  |
| C | -0.0165446388 | -3.3584669623 | 2.3768961812  |
| C | -0.4924350417 | -2.8230894068 | 1.1559343407  |
| H | 4.0780734819  | 0.8899076947  | -2.2990404816 |
| H | 5.0589109773  | -1.0120674433 | -3.4858958147 |
| H | 4.5049586566  | -3.3774412509 | -2.7711895132 |
| H | 2.9331834367  | -3.7168935531 | -0.8556529853 |
| H | 3.2783120236  | -2.5074231642 | 2.0071373139  |
| H | 1.720647049   | -3.6375808578 | 3.6525864595  |
| H | -0.7026062874 | -3.9067143785 | 3.0374985058  |
| N | 0.3519001719  | -2.1730961623 | 0.3122841804  |
| C | 2.3134748826  | 0.9617676137  | -0.1165447864 |
| C | 2.3755594758  | 2.3505202861  | -0.9168116548 |
| C | 3.2898449604  | 1.3192462505  | 1.1711381268  |

|    |               |               |               |
|----|---------------|---------------|---------------|
| C  | 3.82697258    | 2.8408420977  | -0.6527492282 |
| C  | 1.5904637727  | 3.4022450161  | -0.0664737782 |
| C  | 3.710520891   | 2.8046986394  | 0.8858491913  |
| H  | 3.9939706726  | 3.8682873683  | -1.0432090116 |
| H  | 4.6355307282  | 2.1975488948  | -1.0467600303 |
| H  | 1.3554857318  | 4.2815415607  | -0.7017480733 |
| H  | 0.6221318475  | 2.9848480605  | 0.259959467   |
| C  | 2.5382283973  | 3.7777590493  | 1.1052518953  |
| H  | 4.6300194929  | 3.0814494235  | 1.4433993798  |
| H  | 2.8963757754  | 4.8251584817  | 1.0185779489  |
| H  | 2.0700258507  | 3.6877759596  | 2.1053202877  |
| C  | 4.5841546774  | 0.4737562434  | 1.2317308199  |
| H  | 4.3731844896  | -0.6055509248 | 1.3634006643  |
| H  | 5.2118459009  | 0.5716118605  | 0.3244808376  |
| H  | 5.1952068215  | 0.8026577582  | 2.099538489   |
| C  | 2.5740127365  | 1.1394945008  | 2.5142134011  |
| H  | 2.314432073   | 0.0771528762  | 2.6930941759  |
| H  | 3.2322187053  | 1.4740614377  | 3.3450842861  |
| H  | 1.6325867167  | 1.7155933307  | 2.5945049274  |
| C  | 1.8231622463  | 2.3395506754  | -2.3445976337 |
| H  | 1.9463417633  | 3.3408114882  | -2.80979303   |
| H  | 2.2890554225  | 1.5938727292  | -3.0155316833 |
| H  | 0.7353154118  | 2.1201845865  | -2.3229794403 |
| C  | 2.8992246455  | -0.2611939696 | -0.8813534976 |
| O  | 0.9762352238  | 0.6123752158  | 0.2088277441  |
| C  | -1.9067238226 | -3.0225855148 | 0.7395466346  |
| C  | -2.2363504594 | -3.1582024434 | -0.6284868344 |
| C  | -2.9415134208 | -3.136147985  | 1.698207105   |
| C  | -3.5594632164 | -3.39852401   | -1.0266784488 |
| H  | -1.4407587674 | -3.0883980132 | -1.3845846028 |
| C  | -4.2664701563 | -3.3695650979 | 1.2984398603  |
| H  | -2.7155869483 | -3.0091250233 | 2.7680807966  |
| C  | -4.5806496435 | -3.5038283784 | -0.065676831  |
| H  | -3.792765954  | -3.5068879823 | -2.0975923126 |
| H  | -5.0605117546 | -3.4398787292 | 2.0586992027  |
| H  | -5.6202554068 | -3.6896616732 | -0.3790196591 |
| Zn | -0.0811671067 | -0.5712989031 | -1.1407758826 |
| C  | 0.0670954586  | -0.8218284937 | -3.1216511678 |

|    |               |               |               |
|----|---------------|---------------|---------------|
| H  | -0.0953013608 | 0.1603307017  | -3.6209636701 |
| H  | 1.1386135565  | -1.0592698122 | -3.309760428  |
| C  | -1.7969493299 | 2.9286046153  | 1.1106549269  |
| C  | -2.5873217019 | 0.8902447736  | 0.1962250843  |
| H  | -3.2478244262 | 0.7921428788  | 1.0861112864  |
| Zn | -0.4911818296 | 1.0326174171  | 1.5650708519  |
| O  | -1.6849216242 | -0.0403684508 | 0.0545475725  |
| H  | -1.4155898333 | 3.3656404539  | 0.1642657249  |
| H  | -2.8931517649 | 3.0667287002  | 1.1034063018  |
| C  | -0.7313554604 | 0.3963699997  | 3.4539114677  |
| H  | -0.1791813114 | -0.5655902268 | 3.5498936537  |
| H  | -0.2145989214 | 1.1083693381  | 4.1357497311  |
| C  | -3.2257129248 | 1.5683849123  | -0.9560870191 |
| C  | -2.6317827858 | 1.5889349379  | -2.239163458  |
| C  | -4.4833493352 | 2.196346443   | -0.7803421048 |
| C  | -3.2748676338 | 2.2234010758  | -3.3122936224 |
| H  | -1.6657852181 | 1.0848776495  | -2.3943021244 |
| C  | -5.1260180866 | 2.8306208402  | -1.8532476379 |
| H  | -4.9650231162 | 2.1716864102  | 0.2115962893  |
| C  | -4.5216546952 | 2.8487628778  | -3.1241404491 |
| H  | -2.7999843086 | 2.2271745763  | -4.3063214302 |
| H  | -6.1062163572 | 3.3097609077  | -1.700367813  |
| H  | -5.0246476122 | 3.3463437941  | -3.9686589452 |
| C  | -0.8196351494 | -1.883810954  | -3.7908288187 |
| H  | -0.6687870272 | -1.9365343053 | -4.8946360819 |
| H  | -0.6097451976 | -2.9060427169 | -3.4042983337 |
| H  | -1.9032465235 | -1.6937930537 | -3.6278901083 |
| C  | -2.1916370584 | 0.2151114617  | 3.8905902742  |
| H  | -2.7291364437 | -0.5185403785 | 3.2507583005  |
| H  | -2.2910443245 | -0.1458937782 | 4.9422762211  |
| H  | -2.7677570165 | 1.1650483996  | 3.8319476327  |
| C  | -1.242344041  | 3.6530446847  | 2.3511808378  |
| H  | -1.6127850811 | 3.2091423744  | 3.2985396964  |
| H  | -0.1328734776 | 3.6577026043  | 2.4099149413  |
| H  | -1.559046153  | 4.7243920834  | 2.3529895614  |
| H  | -1.559046153  | 4.7243920834  | 2.3529895614  |

TS 0018



E(RB-P86) = -5316.45367186 A.U.

First frequency = -197.3682 cm<sup>-1</sup>

|   |               |               |               |
|---|---------------|---------------|---------------|
| C | 2.5968657226  | -1.6668013674 | -0.3771187999 |
| C | 3.8761170307  | -0.2743139788 | -1.8811201707 |
| C | 4.5342943219  | -1.3926701276 | -2.4120338589 |
| C | 4.239456988   | -2.6715309331 | -1.9221206942 |
| C | 3.2788895628  | -2.7907735195 | -0.9113721538 |
| C | 1.612496561   | -2.0793201451 | 0.6889818518  |
| C | 2.0814830688  | -2.538889967  | 1.9356738363  |
| C | 1.1848185813  | -3.1807907986 | 2.804012629   |
| C | -0.1360523451 | -3.3870883789 | 2.3937247902  |
| C | -0.5557614428 | -2.8971802311 | 1.1346462015  |
| H | 4.152702418   | 0.7081086605  | -2.2789906646 |
| H | 5.2819039298  | -1.2552075482 | -3.2094549579 |
| H | 4.7424906261  | -3.5661051471 | -2.3210116736 |
| H | 3.0284860979  | -3.7888524299 | -0.5173942568 |
| H | 3.14141696    | -2.4123398679 | 2.1999843354  |
| H | 1.526250976   | -3.5498141361 | 3.7840889595  |
| H | -0.8382325787 | -3.9495896306 | 3.02476513    |
| N | 0.3122986761  | -2.2308303952 | 0.3283478056  |
| C | 2.2508801493  | 0.921013793   | -0.2496599812 |
| C | 2.2390394809  | 2.1975616177  | -1.2359688612 |
| C | 3.2003874285  | 1.4978615351  | 0.9731531705  |
| C | 3.6227434657  | 2.8610262158  | -0.988639521  |
| C | 1.3236875739  | 3.2680143406  | -0.5667353177 |
| C | 3.4514805863  | 2.9827952739  | 0.539159364   |
| H | 3.6959497112  | 3.8498717433  | -1.4915489713 |
| H | 4.5082595363  | 2.2697845098  | -1.2883685825 |
| H | 1.0940791673  | 4.0598173983  | -1.3098752647 |
| H | 0.3613479135  | 2.8212601975  | -0.2625486631 |
| C | 2.1622546491  | 3.8291364107  | 0.616524352   |
| H | 4.3091741772  | 3.4279437084  | 1.0863512276  |
| H | 2.4070380821  | 4.9016982491  | 0.4675299316  |
| H | 1.6484856324  | 3.7635667691  | 1.5968645896  |
| C | 4.5714129982  | 0.7874639359  | 1.0840771639  |
| H | 4.4597539756  | -0.287232579  | 1.3325011834  |
| H | 5.1743493967  | 0.8435529941  | 0.1576352683  |

|    |               |               |               |
|----|---------------|---------------|---------------|
| H  | 5.1635086121  | 1.2596500084  | 1.896996532   |
| C  | 2.542719931   | 1.3733694852  | 2.3510605449  |
| H  | 2.3500352548  | 0.3146918051  | 2.6147634701  |
| H  | 3.2110057601  | 1.8003408225  | 3.1295372908  |
| H  | 1.5801614718  | 1.9147699238  | 2.4370702594  |
| C  | 1.7851377083  | 1.9572613474  | -2.67728817   |
| H  | 0.7347820244  | 1.6019767978  | -2.6921481579 |
| H  | 1.8198057457  | 2.9091791427  | -3.2489746084 |
| H  | 2.3839676892  | 1.2094101543  | -3.2303893976 |
| C  | 2.8952172914  | -0.3547849029 | -0.8604554623 |
| O  | 0.9363305569  | 0.5635378533  | 0.1476445527  |
| C  | -1.9291657255 | -3.1610222886 | 0.6259019053  |
| C  | -3.0262064903 | -3.2997341202 | 1.5091442913  |
| C  | -2.152336356  | -3.3352817929 | -0.7601529408 |
| C  | -4.3089978466 | -3.5886629193 | 1.0196354462  |
| H  | -2.8830165632 | -3.1486723337 | 2.5900994913  |
| C  | -3.4345778067 | -3.6292101131 | -1.2476626014 |
| H  | -1.3045671582 | -3.2544582863 | -1.456005383  |
| C  | -4.5185351987 | -3.7546214579 | -0.3610279559 |
| H  | -5.1529102695 | -3.6772570467 | 1.7220224759  |
| H  | -3.5860849245 | -3.766143378  | -2.3299674669 |
| H  | -5.5256023119 | -3.9825613019 | -0.7449480698 |
| Zn | -0.1833260395 | -0.6337451908 | -1.1021416441 |
| C  | -0.4047013232 | -1.0707280364 | -3.0408428699 |
| H  | -1.4750831476 | -1.3451804049 | -3.1862002158 |
| H  | -0.2532046676 | -0.1599708203 | -3.6622941377 |
| C  | -1.4946697827 | 2.8875077412  | 1.4771625864  |
| C  | -2.5349712398 | 0.9793563931  | 0.3496180304  |
| H  | -3.1663294754 | 0.9577123879  | 1.2664291753  |
| Zn | -0.3979922531 | 0.9381245359  | 1.6710690291  |
| O  | -1.7355128959 | -0.0272482151 | 0.1709182274  |
| H  | -0.4687054194 | 3.2251159835  | 1.7696365865  |
| H  | -1.7199335235 | 3.4293387992  | 0.5399539136  |
| C  | -0.4940571035 | 0.211400211   | 3.5412150734  |
| H  | 0.2620395455  | -0.5999649505 | 3.6319858211  |
| H  | -0.1456663055 | 1.0204470194  | 4.2241327215  |
| C  | -3.114154715  | 1.761243459   | -0.7656641751 |
| C  | -2.5371672617 | 1.76972066    | -2.0573630886 |

|   |               |               |               |
|---|---------------|---------------|---------------|
| C | -4.2996233395 | 2.5056017861  | -0.5464404288 |
| C | -3.1219844465 | 2.509682224   | -3.0944614653 |
| H | -1.627940378  | 1.1787894616  | -2.2444218117 |
| C | -4.8824919381 | 3.247981381   | -1.5838422213 |
| H | -4.771252183  | 2.488679736   | 0.4494314028  |
| C | -4.2942589857 | 3.2541576275  | -2.862119684  |
| H | -2.6612183164 | 2.503525096   | -4.0950162554 |
| H | -5.806084984  | 3.8189902217  | -1.3977881139 |
| H | -4.7525301417 | 3.8340268341  | -3.6791283535 |
| C | 0.5055108252  | -2.1949429151 | -3.5615917147 |
| H | 0.3899881142  | -3.1378113122 | -2.980815655  |
| H | 0.3056339346  | -2.4550043357 | -4.627672338  |
| H | 1.580453995   | -1.9229582643 | -3.4923851848 |
| C | -1.8673856693 | -0.3005079295 | 3.9969663726  |
| H | -1.8564969697 | -0.7186666832 | 5.0321191074  |
| H | -2.6371063528 | 0.5015675571  | 3.9936702782  |
| H | -2.2526860758 | -1.1020136521 | 3.3307141067  |
| C | -2.4677917806 | 3.2169151057  | 2.6012027826  |
| H | -3.4999741176 | 2.8554257449  | 2.3941648814  |
| H | -2.1567554011 | 2.7622670466  | 3.5648035544  |
| H | -2.5590570552 | 4.3148972948  | 2.7748684346  |
| H | -2.5590570552 | 4.3148972948  | 2.7748684346  |

### 7.3 27 *syn pro-R*

#### 7.3.1 Starting TS

TS input

$E(\text{RB-P86}) = -5316.43518481 \text{ A.U.}$

First frequency =  $-237.4626 \text{ cm}^{-1}$

|   |               |               |               |
|---|---------------|---------------|---------------|
| C | -2.1138850769 | -2.2674011613 | -0.7269936919 |
| C | -4.1600721462 | -1.5421657992 | 0.3287861943  |
| C | -4.5961297891 | -2.8678373211 | 0.4748037649  |
| C | -3.7917274066 | -3.9192578048 | 0.0213556104  |
| C | -2.5677154553 | -3.6034045929 | -0.5801439998 |
| C | -0.780228898  | -2.2372023046 | -1.4390875791 |
| C | -0.6941543297 | -2.5075355717 | -2.8200985049 |

|   |               |               |               |
|---|---------------|---------------|---------------|
| C | 0.5671981024  | -2.7292768035 | -3.393624124  |
| C | 1.7028220536  | -2.7309022791 | -2.5763633532 |
| C | 1.5610940864  | -2.4680204732 | -1.1944857253 |
| H | -4.8352728918 | -0.7558372675 | 0.6800094169  |
| H | -5.5719087192 | -3.0685646637 | 0.9451917084  |
| H | -4.1069660218 | -4.9689411669 | 0.1265196625  |
| H | -1.9246790431 | -4.4164685709 | -0.9537543503 |
| H | -1.608894204  | -2.5665662216 | -3.4263442431 |
| H | 0.6572976772  | -2.9419474238 | -4.4707899374 |
| H | 2.6912871787  | -2.9795576356 | -2.9879893394 |
| N | 0.3357937186  | -2.1937753436 | -0.6730713002 |
| C | -2.4998707343 | 0.3116214069  | -0.4284880854 |
| C | -3.3768769245 | 1.3726780542  | 0.3989398589  |
| C | -2.8697857383 | 0.7790650898  | -1.9808835754 |
| C | -4.6397941711 | 1.5395408223  | -0.4947187167 |
| C | -2.7701033521 | 2.8053206209  | 0.1916789482  |
| C | -3.8662229972 | 1.9713492613  | -1.7602066474 |
| H | -5.3175544159 | 2.3344930422  | -0.1142697424 |
| H | -5.2433088036 | 0.6244900376  | -0.6403075341 |
| H | -3.2102138714 | 3.4827880446  | 0.9520644329  |
| H | -1.6746824659 | 2.8566067617  | 0.3663461615  |
| C | -3.1457056296 | 3.2294584611  | -1.250505613  |
| H | -4.4880187606 | 2.1531173014  | -2.6617939623 |
| H | -3.8382815566 | 4.0972613462  | -1.2493421078 |
| H | -2.2720183179 | 3.517724889   | -1.8666143889 |
| C | -3.6372708213 | -0.2754651987 | -2.8116665758 |
| H | -3.0576280049 | -1.2043322402 | -2.9614280356 |
| H | -4.6034911141 | -0.5683843006 | -2.3551778875 |
| H | -3.8560050369 | 0.1442522407  | -3.8173279261 |
| C | -1.6014688646 | 1.1594229514  | -2.7553576693 |
| H | -1.0098728122 | 0.2563655595  | -3.0066020667 |
| H | -1.8642992918 | 1.6699646289  | -3.7073855114 |
| H | -0.9300375571 | 1.8163176309  | -2.1746143868 |
| C | -3.5262181197 | 1.1088945864  | 1.9021901132  |
| H | -3.9557414389 | 0.1243352111  | 2.1608819577  |
| H | -2.5303683278 | 1.1640635982  | 2.3862868253  |
| H | -4.1649626698 | 1.8896604748  | 2.3674493315  |
| C | -2.918326197  | -1.1794775894 | -0.249047181  |

|    |               |               |               |
|----|---------------|---------------|---------------|
| O  | -1.1205650431 | 0.3999829048  | -0.1165100084 |
| C  | 2.718161035   | -2.5677266001 | -0.2657423507 |
| C  | 2.52413424    | -3.0112605541 | 1.0639909439  |
| C  | 4.0348070472  | -2.2826410973 | -0.6983731127 |
| C  | 3.6134869517  | -3.1571225239 | 1.9356542257  |
| H  | 1.5095254373  | -3.2595435026 | 1.4090197531  |
| C  | 5.1224362938  | -2.4249670086 | 0.1761973851  |
| H  | 4.2106974761  | -1.9081842809 | -1.7178175628 |
| C  | 4.9164621928  | -2.8632099567 | 1.4963718407  |
| H  | 3.4416194713  | -3.5087157376 | 2.96512212    |
| H  | 6.1374619739  | -2.1801172556 | -0.1739818255 |
| H  | 5.7712195993  | -2.9753503439 | 2.182214366   |
| Zn | -0.0327044073 | -0.9862537721 | 1.0461761099  |
| C  | -0.3528884344 | -1.6502455541 | 2.8984360591  |
| H  | 0.6060545575  | -1.5714676501 | 3.4593430008  |
| H  | -1.0426834723 | -0.9343573344 | 3.396813624   |
| Zn | -0.0788717763 | 1.7462483435  | 1.0291427338  |
| O  | 1.5367791392  | 0.2352743326  | 0.3149944143  |
| C  | -0.0553083577 | 2.077925426   | 3.0187429349  |
| H  | 0.9382973656  | 1.7231660003  | 3.3780830401  |
| H  | -0.7931673751 | 1.4225542907  | 3.5301646313  |
| C  | 2.279889371   | 1.286175133   | 0.4672739268  |
| C  | 1.2348321799  | 3.3338721374  | 0.0411795548  |
| H  | 0.4006821739  | 3.8625372604  | 0.5723393136  |
| H  | 2.1438348045  | 3.7305345344  | 0.5342817479  |
| H  | 2.4931325926  | 1.6526347255  | 1.5005845371  |
| C  | 3.3783948249  | 1.5399120852  | -0.5022234596 |
| C  | 4.4899628603  | 2.3315769087  | -0.1340314665 |
| C  | 3.3366781192  | 0.9817793447  | -1.8006904264 |
| C  | 5.5364500034  | 2.5607231535  | -1.0407273227 |
| H  | 4.53478324    | 2.7621807151  | 0.880504183   |
| C  | 4.3819895509  | 1.213569077   | -2.7085280828 |
| H  | 2.4661193861  | 0.3667962713  | -2.0757707114 |
| C  | 5.4852959021  | 2.0029141508  | -2.3321371764 |
| H  | 6.4002649703  | 3.1744011713  | -0.7387715557 |
| H  | 4.3365045637  | 0.7809162952  | -3.7212993507 |
| H  | 6.3051272926  | 2.1848441236  | -3.0453929201 |
| C  | -0.921866416  | -3.0738241953 | 3.0065720462  |

|   |               |               |               |
|---|---------------|---------------|---------------|
| H | -1.0637532258 | -3.4031181081 | 4.0630516189  |
| H | -1.9105016367 | -3.1654273973 | 2.5074384911  |
| H | -0.2644859548 | -3.8372771907 | 2.5308981638  |
| C | -0.2713648614 | 3.5405129887  | 3.4345470633  |
| H | -1.2736092408 | 3.9178323186  | 3.1328585612  |
| H | -0.1982712751 | 3.6922078854  | 4.5373557262  |
| H | 0.4753138018  | 4.2252832698  | 2.975067265   |
| C | 1.1880852043  | 3.6647116167  | -1.4421523733 |
| H | 0.2076369671  | 3.4150557664  | -1.8976420206 |
| H | 1.360798394   | 4.7496041626  | -1.6348873525 |
| H | 1.9614268554  | 3.1183931927  | -2.023228151  |
| H | 1.9614268554  | 3.1183931927  | -2.023228151  |

### 7.3.2 Lowest TS

TS 0001

E(RB-P86) = -5316.43543817 A.U.

First frequency = -217.9958  $\text{cm}^{-1}$

|   |               |               |               |
|---|---------------|---------------|---------------|
| C | 1.8863619598  | 2.3023828793  | -0.6103498475 |
| C | 3.9782127384  | 1.6637149072  | 0.4070346874  |
| C | 4.3522938002  | 3.006223935   | 0.5683920072  |
| C | 3.4948455843  | 4.0242347358  | 0.1379923378  |
| C | 2.279708238   | 3.6568706239  | -0.451147158  |
| C | 0.5390280225  | 2.2279389467  | -1.2907064464 |
| C | 0.3981416622  | 2.6092494448  | -2.6407445688 |
| C | -0.8898130212 | 2.7967882267  | -3.1663386956 |
| C | -2.0007491407 | 2.6381949947  | -2.3319115413 |
| C | -1.8067399667 | 2.2515811989  | -0.985588447  |
| H | 4.6967084548  | 0.9084148958  | 0.7375874391  |
| H | 5.3228609801  | 3.2457134606  | 1.0312910572  |
| H | 3.760517407   | 5.0864335451  | 0.2532840782  |
| H | 1.5919897291  | 4.442994704   | -0.8017638442 |
| H | 1.2919793325  | 2.7847055521  | -3.2559682476 |
| H | -1.0217113466 | 3.102328565   | -4.2165259806 |
| H | -3.0164544496 | 2.8420709288  | -2.6988963407 |
| N | -0.5523555024 | 2.0311636723  | -0.5099411786 |
| C | 2.4223229461  | -0.2690621567 | -0.3714157718 |

|   |               |               |               |
|---|---------------|---------------|---------------|
| C | 3.401716802   | -1.2864195875 | 0.394011388   |
| C | 2.7807243019  | -0.6652540824 | -1.9483995689 |
| C | 4.6505573922  | -1.3196937254 | -0.5339483376 |
| C | 2.892648504   | -2.7518785731 | 0.1459437941  |
| C | 3.8830751728  | -1.772593514  | -1.7938230791 |
| H | 5.399088003   | -2.069242442  | -0.1966058233 |
| H | 5.1751198284  | -0.3548868344 | -0.6630605165 |
| H | 3.3764742377  | -3.4232437661 | 0.8846353038  |
| H | 1.8022616631  | -2.8709984108 | 0.3169967672  |
| C | 3.2899817548  | -3.1038038972 | -1.309890335  |
| H | 4.4925322848  | -1.8690235605 | -2.7167393426 |
| H | 4.0620726264  | -3.9012838992 | -1.3383484953 |
| H | 2.4413383994  | -3.4585751865 | -1.9268457051 |
| C | 3.4263859261  | 0.4718532709  | -2.7739089074 |
| H | 2.7552973593  | 1.3413428961  | -2.8967053723 |
| H | 4.3700456115  | 0.8482380167  | -2.3316963039 |
| H | 3.6618065102  | 0.0913709985  | -3.7913171583 |
| C | 1.5311676967  | -1.1376738333 | -2.701657419  |
| H | 0.8619966386  | -0.2809379962 | -2.9212548994 |
| H | 1.8160747895  | -1.5962105198 | -3.6736411553 |
| H | 0.9344640974  | -1.8705038104 | -2.1307247037 |
| C | 3.577319545   | -1.0688094571 | 1.9021616028  |
| H | 4.2877436596  | -1.8164380205 | 2.3149684025  |
| H | 3.9401374319  | -0.0658349652 | 2.1902409191  |
| H | 2.6070953131  | -1.2195278483 | 2.4152593156  |
| C | 2.7498569804  | 1.2448474074  | -0.1624538038 |
| O | 1.0614543623  | -0.4711775932 | -0.010668559  |
| C | -2.9539964811 | 2.1415640852  | -0.0468737274 |
| C | -2.8085863622 | 2.523082739   | 1.3075421484  |
| C | -4.2203575749 | 1.7000923092  | -0.4983577605 |
| C | -3.9011051362 | 2.4661564674  | 2.1851828265  |
| H | -1.8325698655 | 2.8799850441  | 1.6695286166  |
| C | -5.3099108312 | 1.6389203863  | 0.3835049175  |
| H | -4.3439159438 | 1.3615458502  | -1.5386267945 |
| C | -5.1548850679 | 2.0241044403  | 1.7271804268  |
| H | -3.7709035826 | 2.7719745996  | 3.2350485993  |
| H | -6.2846479538 | 1.2769872734  | 0.0202592369  |
| H | -6.0113506018 | 1.9768622722  | 2.4184468809  |

|    |               |               |               |
|----|---------------|---------------|---------------|
| Zn | 0.0308820254  | 0.8892711664  | 1.192102347   |
| C  | 0.3959585354  | 1.5854442038  | 3.0221938112  |
| H  | -0.4881816452 | 1.3303592091  | 3.6495675504  |
| H  | 1.2359967967  | 0.989750421   | 3.4439994525  |
| Zn | 0.1734582809  | -1.9172619018 | 1.2353425803  |
| O  | -1.5111513581 | -0.5577330672 | 1.0240109609  |
| C  | 0.4456573999  | -2.4009223666 | 3.170035931   |
| H  | 0.945219283   | -1.5632491084 | 3.7041181556  |
| H  | 1.1481491247  | -3.2645041137 | 3.214512402   |
| C  | -2.1870640977 | -1.5753753956 | 0.5749637194  |
| C  | -1.0477421282 | -3.6299944025 | 0.286559359   |
| H  | -0.4189069727 | -4.1608810471 | 1.0391314415  |
| H  | -2.0828702801 | -3.9486989224 | 0.5122598699  |
| H  | -2.798633003  | -2.127077432  | 1.3265233087  |
| C  | -2.7548424946 | -1.6028442347 | -0.7961601988 |
| C  | -3.9614628848 | -2.2990707834 | -1.0396779467 |
| C  | -2.1183360714 | -0.9420714645 | -1.8711671302 |
| C  | -4.5277495098 | -2.3224953936 | -2.324123677  |
| H  | -4.4644962563 | -2.815585579  | -0.2049712892 |
| C  | -2.6823604142 | -0.9694460501 | -3.1556223836 |
| H  | -1.16162147   | -0.4356127999 | -1.6772602406 |
| C  | -3.8911152591 | -1.6548416749 | -3.3871244655 |
| H  | -5.4725791908 | -2.8621581568 | -2.4979937217 |
| H  | -2.1706915485 | -0.4600202567 | -3.9879897053 |
| H  | -4.3318253773 | -1.6762082972 | -4.3967367413 |
| C  | 0.7211026566  | 3.0829419104  | 3.1380393584  |
| H  | 1.6357201618  | 3.3546971297  | 2.5684302179  |
| H  | -0.0938764405 | 3.731356922   | 2.7417405284  |
| H  | 0.8907690264  | 3.409910476   | 4.1912150868  |
| C  | -0.8777049709 | -2.7447829705 | 3.8680738043  |
| H  | -1.5798674497 | -1.8831669705 | 3.8588117925  |
| H  | -1.4031931391 | -3.595090853  | 3.3793707075  |
| H  | -0.7399083897 | -3.0343834014 | 4.936743543   |
| C  | -0.6513326149 | -4.0123357541 | -1.1317991914 |
| H  | 0.436083801   | -3.8912743711 | -1.3149821126 |
| H  | -0.8923410599 | -5.078669781  | -1.3536828021 |
| H  | -1.1815957826 | -3.40853977   | -1.8990550297 |
| H  | -1.1815957826 | -3.40853977   | -1.8990550297 |



### 7.3.3 Additional TS

TS 0016

E(RB-P86) = -5316.43543818 A.U.

First frequency = -217.8486  $\text{cm}^{-1}$

|   |               |               |               |
|---|---------------|---------------|---------------|
| C | 1.8523460229  | 2.3512545883  | -0.5759443527 |
| C | 3.9466519299  | 1.7100897622  | 0.4348103864  |
| C | 4.3119629176  | 3.052270032   | 0.6175813636  |
| C | 3.4487311182  | 4.0714036288  | 0.2016352506  |
| C | 2.2368454775  | 3.7055647072  | -0.3951056445 |
| C | 0.5065294851  | 2.2788409748  | -1.2595181456 |
| C | 0.3651897138  | 2.6800484096  | -2.603725529  |
| C | -0.9231751372 | 2.8674703977  | -3.1283645896 |
| C | -2.0342919484 | 2.6889493607  | -2.2982148878 |
| C | -1.8397906476 | 2.2828526345  | -0.9577062732 |
| H | 4.6694160781  | 0.9542971145  | 0.7547671848  |
| H | 5.2802862902  | 3.2906756854  | 1.0857111273  |
| H | 3.7074910273  | 5.1333420225  | 0.3338187752  |
| H | 1.5446889059  | 4.4926764779  | -0.7345990498 |
| H | 1.2587829979  | 2.8706503392  | -3.2147831952 |
| H | -1.05549459   | 3.1883250949  | -4.1739218005 |
| H | -3.0507379436 | 2.892001584   | -2.6636021951 |
| N | -0.5847116935 | 2.0631082372  | -0.4835797002 |
| C | 2.4042452531  | -0.2201495596 | -0.3760857209 |
| C | 3.3888579422  | -1.2431045478 | 0.3750425078  |
| C | 2.7675803041  | -0.5894834923 | -1.9584484265 |
| C | 4.6393142335  | -1.2540908739 | -0.5512709949 |
| C | 2.8894442697  | -2.7077030626 | 0.1034129434  |
| C | 3.8766355728  | -1.6921635022 | -1.819289394  |
| H | 5.3920361764  | -2.0040805618 | -0.2243964407 |
| H | 5.157983006   | -0.2841169955 | -0.6645098321 |
| H | 3.3763994413  | -3.3874063864 | 0.8323607971  |
| H | 1.799582158   | -2.8363175507 | 0.2708548304  |
| C | 3.2911987219  | -3.0344332056 | -1.3570692803 |
| H | 4.4881065715  | -1.770417733  | -2.7425932934 |
| H | 4.0683368756  | -3.8265168164 | -1.3966834973 |
| H | 2.4457441406  | -3.3848748059 | -1.9808394804 |
| C | 3.4073769261  | 0.5643653978  | -2.7650831186 |

|    |               |               |               |
|----|---------------|---------------|---------------|
| H  | 4.3477857819  | 0.9399457939  | -2.3153311354 |
| H  | 3.6470776421  | 0.2011622981  | -3.7877932113 |
| H  | 2.7309022754  | 1.4313117936  | -2.8757242177 |
| C  | 1.5221879517  | -1.0579093392 | -2.7210319351 |
| H  | 0.8478992534  | -0.2020912724 | -2.9281885087 |
| H  | 1.8114587193  | -1.4992783894 | -3.6996521029 |
| H  | 0.9293081071  | -1.8034000237 | -2.1626459584 |
| C  | 3.5607031282  | -1.0479062438 | 1.886683015   |
| H  | 3.9162172836  | -0.0471165142 | 2.1909974294  |
| H  | 2.5907480005  | -1.2132383776 | 2.3957852548  |
| H  | 4.2755912273  | -1.797056718  | 2.2888887925  |
| C  | 2.7218470912  | 1.292369377   | -0.1431055033 |
| O  | 1.0441354217  | -0.4364290932 | -0.0207204609 |
| C  | -2.9876962315 | 2.150936084   | -0.0226220381 |
| C  | -2.8466820417 | 2.512173222   | 1.3378067897  |
| C  | -4.2505720775 | 1.7085603008  | -0.4829033197 |
| C  | -3.9400899855 | 2.4346559834  | 2.2127553303  |
| H  | -1.8734770765 | 2.8695530585  | 1.7068299882  |
| C  | -5.3409964301 | 1.6267495782  | 0.3962062434  |
| H  | -4.3704648988 | 1.3854751522  | -1.5285070179 |
| C  | -5.1903748283 | 1.9918947627  | 1.7459645646  |
| H  | -3.8133562942 | 2.724864683   | 3.2674652715  |
| H  | -6.3128857913 | 1.2643663295  | 0.0258469426  |
| H  | -6.0475296759 | 1.9284592568  | 2.4350776536  |
| Zn | 0.0034039469  | 0.8986295396  | 1.2013882198  |
| C  | 0.3612249483  | 1.568182702   | 3.0428032101  |
| H  | -0.5218964772 | 1.2970056524  | 3.6648351555  |
| H  | 1.2048850431  | 0.9717285511  | 3.456223557   |
| Zn | 0.1632130677  | -1.9072408633 | 1.2010494195  |
| O  | -1.529630208  | -0.5550127587 | 1.0079415029  |
| C  | 0.4355285408  | -2.4193321185 | 3.1283831822  |
| H  | 0.9286773804  | -1.5868496871 | 3.6763610013  |
| H  | 1.1436725746  | -3.2788365411 | 3.1604935887  |
| C  | -2.1980902119 | -1.5699328046 | 0.5419243975  |
| C  | -1.0451520063 | -3.6126164583 | 0.2233569395  |
| H  | -0.4137851914 | -4.151200662  | 0.9683082173  |
| H  | -2.0784652877 | -3.9414719226 | 0.4427254971  |
| H  | -2.8071367704 | -2.1373593795 | 1.2837632525  |

|   |               |               |               |
|---|---------------|---------------|---------------|
| C | -2.7636395237 | -1.5795785047 | -0.8303628647 |
| C | -3.9652758924 | -2.2798103678 | -1.0866969575 |
| C | -2.1299791782 | -0.897723024  | -1.8938212751 |
| C | -4.5295659979 | -2.2866514296 | -2.3722177388 |
| H | -4.4660822869 | -2.8127434473 | -0.26102084   |
| C | -2.6919913309 | -0.9084711862 | -3.1794029893 |
| H | -1.1768966135 | -0.3881397    | -1.6904777018 |
| C | -3.8958597558 | -1.5980702459 | -3.423553754  |
| H | -5.4705555931 | -2.8297151119 | -2.5560407768 |
| H | -2.1825310405 | -0.3825596551 | -4.0028253101 |
| H | -4.334992825  | -1.6063533875 | -4.4340455192 |
| C | 0.6758025672  | 3.065871107   | 3.1828551684  |
| H | 0.841789593   | 3.3772522512  | 4.2413279368  |
| H | 1.5892739116  | 3.3529517465  | 2.6189498598  |
| H | -0.1431252953 | 3.714850147   | 2.7957212638  |
| C | -0.8866088317 | -2.7828673598 | 3.8187364796  |
| H | -1.5945080742 | -1.9259110108 | 3.8217553862  |
| H | -1.4056203092 | -3.6289199646 | 3.3159324692  |
| H | -0.7485711938 | -3.0881969839 | 4.8829885982  |
| C | -0.6445012492 | -3.970133673  | -1.2002674984 |
| H | -0.8781912997 | -5.0344384311 | -1.4390826816 |
| H | -1.1777750928 | -3.3579345319 | -1.9587229504 |
| H | 0.4423225177  | -3.8390869821 | -1.3800686793 |
| H | 0.4423225177  | -3.8390869821 | -1.3800686793 |

TS 0018 <sup>1</sup>

E(RB-P86) = -5316.43777925 A.U.

First frequency = -272.2912 cm<sup>-1</sup>

|   |              |              |               |
|---|--------------|--------------|---------------|
| C | 2.1893903327 | 2.6399017672 | -0.6754134238 |
| C | 4.5193534562 | 2.0601009006 | -0.3843243823 |
| C | 4.8323252683 | 3.3848392459 | -0.0431086979 |
| C | 3.8215015609 | 4.3564428071 | -0.0100497177 |
| C | 2.5129579939 | 3.97682463   | -0.338074317  |
| C | 0.747597915  | 2.4534974536 | -1.0743597357 |
| C | 0.3444363216 | 2.8148329917 | -2.3811757562 |

---

<sup>1</sup>In this particular case, CREST change the conformation from **27** to **25**. TS 0018 is more stable than TS 0001 but do not represent the right conformation.

|   |               |               |               |
|---|---------------|---------------|---------------|
| C | -1.0221053173 | 2.864501492   | -2.6858800198 |
| C | -1.9602163413 | 2.6123905785  | -1.6755471609 |
| C | -1.4943326075 | 2.295825358   | -0.3773163353 |
| H | 5.336441433   | 1.327438015   | -0.4042462626 |
| H | 5.8729685532  | 3.6532971674  | 0.2005292769  |
| H | 4.0462087972  | 5.3996397176  | 0.2626301523  |
| H | 1.7089661959  | 4.7310047979  | -0.3354869647 |
| H | 1.1058958117  | 3.0643096837  | -3.1341009713 |
| H | -1.3574026606 | 3.1367305695  | -3.6995602943 |
| H | -3.0367489859 | 2.7183140363  | -1.8720572237 |
| N | -0.1703070781 | 2.1968446761  | -0.1064857315 |
| C | 2.8189226945  | 0.1733634797  | -1.0283387176 |
| C | 3.7363240405  | -0.9352368565 | -0.2907220406 |
| C | 3.1154621045  | -0.1909520693 | -2.608041621  |
| C | 4.9120441852  | -1.1447664278 | -1.2805271246 |
| C | 2.9870431042  | -2.2928939309 | -0.4715361199 |
| C | 4.0196771439  | -1.4652562898 | -2.4974731456 |
| H | 5.5587292183  | -1.9998673203 | -0.9834066894 |
| H | 5.5705819057  | -0.2671374823 | -1.4305638482 |
| H | 3.4211894534  | -3.0461666637 | 0.2199138987  |
| H | 1.9152166448  | -2.1770116503 | -0.2256814973 |
| C | 3.2249468339  | -2.6774642028 | -1.9607403101 |
| H | 4.5572199868  | -1.6727875659 | -3.4477682424 |
| H | 3.8411397395  | -3.5976526536 | -2.0488971415 |
| H | 2.2860568285  | -2.8672193297 | -2.5161229316 |
| C | 3.8915416382  | 0.9022624423  | -3.3744758218 |
| H | 4.0462878989  | 0.5820222607  | -4.4280153098 |
| H | 3.3366373357  | 1.862786337   | -3.3954718341 |
| H | 4.8894985516  | 1.1176333897  | -2.9439043619 |
| C | 1.8054340542  | -0.4477664913 | -3.3694073939 |
| H | 1.2482208708  | 0.4985016107  | -3.5254914824 |
| H | 2.0243621847  | -0.881192456  | -4.3702556956 |
| H | 1.1299525956  | -1.1281758836 | -2.8208543859 |
| C | 4.0624640607  | -0.6802592707 | 1.1813622865  |
| H | 4.6303462569  | -1.5367251622 | 1.6047292896  |
| H | 4.6585234432  | 0.2362863809  | 1.3561906279  |
| H | 3.1276219016  | -0.5824110738 | 1.7743340578  |
| C | 3.2034488458  | 1.6376203558  | -0.6918982919 |

|    |               |               |               |
|----|---------------|---------------|---------------|
| O  | 1.4686089621  | 0.0174780435  | -0.7347489271 |
| C  | -2.4405578412 | 2.1587595263  | 0.7673915208  |
| C  | -3.790704943  | 1.7694129521  | 0.5778554066  |
| C  | -2.0221718066 | 2.5176990033  | 2.0719384687  |
| C  | -4.6985682479 | 1.7704216159  | 1.6524064574  |
| H  | -4.1420455077 | 1.483232836   | -0.4258229183 |
| C  | -2.931236333  | 2.5212966337  | 3.1406375237  |
| H  | -0.9756392255 | 2.8182634386  | 2.2258167686  |
| C  | -4.2743903488 | 2.1570372629  | 2.9355523771  |
| H  | -5.7446005609 | 1.4696088862  | 1.4829557615  |
| H  | -2.5870828468 | 2.8191069083  | 4.1435917756  |
| H  | -4.9873733805 | 2.1663264097  | 3.7746458666  |
| Zn | 0.7181491214  | 0.3741056222  | 1.0110015475  |
| C  | 0.796589359   | 0.4193238671  | 2.9982993198  |
| H  | -0.2562663881 | 0.4282329418  | 3.3640638956  |
| H  | 1.2092106522  | -0.5583942644 | 3.3386542883  |
| Zn | -2.8514431844 | -1.0346259807 | 1.3251897011  |
| O  | -0.9952931198 | -0.9249098698 | 0.59439874    |
| C  | -3.5804277287 | -1.375597305  | 3.1277505597  |
| H  | -4.6885743334 | -1.4152519652 | 3.0407118905  |
| H  | -3.345495246  | -0.4784413292 | 3.7388135281  |
| C  | -1.4602795282 | -1.2926593319 | -0.5940726407 |
| C  | -3.7217596965 | -1.686957559  | -0.6132709899 |
| H  | -4.5099217827 | -0.9489969162 | -0.3243948329 |
| H  | -3.5395851049 | -1.5021786597 | -1.6876278161 |
| H  | -1.6112437855 | -0.4909742893 | -1.3500737345 |
| C  | -1.0710781296 | -2.6105944479 | -1.1484318628 |
| C  | -1.2087216654 | -2.8758818586 | -2.5308303785 |
| C  | -0.5583792682 | -3.6204200434 | -0.3017530838 |
| C  | -0.8469965831 | -4.1255202031 | -3.054983518  |
| H  | -1.5913482268 | -2.0876916215 | -3.2001565491 |
| C  | -0.1970803847 | -4.869965312  | -0.8275735065 |
| H  | -0.4349903891 | -3.3994896531 | 0.769532478   |
| C  | -0.3425952171 | -5.1269958066 | -2.2035909934 |
| H  | -0.9501709563 | -4.3193241039 | -4.1343720443 |
| H  | 0.2071946875  | -5.6485580596 | -0.1615280873 |
| H  | -0.0563790953 | -6.1077738951 | -2.6154767164 |
| C  | 1.5891835817  | 1.568916146   | 3.6394072359  |

|   |               |               |               |
|---|---------------|---------------|---------------|
| H | 1.1977300232  | 2.5680298494  | 3.3439887799  |
| H | 1.5753608096  | 1.5395698931  | 4.7547385944  |
| H | 2.6576784643  | 1.5578089846  | 3.3338670949  |
| C | -3.0331080314 | -2.6461281942 | 3.7964970858  |
| H | -1.9294145205 | -2.6110284393 | 3.914977475   |
| H | -3.4603274051 | -2.7926996021 | 4.8153378481  |
| H | -3.2679768881 | -3.5659361049 | 3.2187071996  |
| C | -4.1683031212 | -3.1216087831 | -0.3504103841 |
| H | -4.5229914048 | -3.2712765249 | 0.6915387116  |
| H | -5.0025015095 | -3.4236879417 | -1.0248043276 |
| H | -3.3447302273 | -3.8470549021 | -0.5259580368 |
| H | -3.3447302273 | -3.8470549021 | -0.5259580368 |

## 7.4 28 *syn pro-S*

### 7.4.1 Starting TS

TS input

E(RB-P86) = -5316.45156508 A.U.

First frequency = -205.2287 cm<sup>-1</sup>

|   |               |              |               |
|---|---------------|--------------|---------------|
| C | -1.9860547676 | 2.2051916397 | 0.4809781243  |
| C | -4.0304123563 | 1.6239418494 | -0.6614562629 |
| C | -4.3567331783 | 2.977121865  | -0.837035179  |
| C | -3.4979538486 | 3.970145342  | -0.3523986441 |
| C | -2.3293703255 | 3.570235156  | 0.3064788085  |
| C | -0.681089903  | 2.076227771  | 1.2317061072  |
| C | -0.6095413434 | 2.3344308052 | 2.6155478944  |
| C | 0.6505494835  | 2.4621339212 | 3.2207861112  |
| C | 1.8017845775  | 2.3912689699 | 2.4295665288  |
| C | 1.6737721041  | 2.1526833232 | 1.0410414127  |
| H | -4.7444428596 | 0.8873161459 | -1.0425305576 |
| H | -5.2905183752 | 3.2460931875 | -1.3560567269 |
| H | -3.7289900529 | 5.0392557776 | -0.4788030648 |
| H | -1.643444105  | 4.33608725   | 0.7031278636  |
| H | -1.5321609975 | 2.4575743763 | 3.1998260844  |
| H | 0.730020863   | 2.660719182  | 4.3014524082  |
| H | 2.7952976984  | 2.5687015067 | 2.8651066515  |

|   |               |               |               |
|---|---------------|---------------|---------------|
| N | 0.4463385829  | 1.9577059862  | 0.4883647092  |
| C | -2.5400837697 | -0.3396699845 | 0.183588259   |
| C | -3.458988141  | -1.3334255575 | -0.6767530121 |
| C | -3.0040729979 | -0.7673560307 | 1.7200494898  |
| C | -4.7702572133 | -1.3834997293 | 0.1621095827  |
| C | -3.0051743481 | -2.8163754688 | -0.4441523712 |
| C | -4.0881406958 | -1.8724125265 | 1.4614858644  |
| H | -5.4968718226 | -2.1209078496 | -0.242966883  |
| H | -5.3003606965 | -0.4210155293 | 0.2847808656  |
| H | -3.5172152189 | -3.4443434374 | -1.2020635107 |
| H | -1.9251984111 | -2.9861616348 | -0.6312346263 |
| C | -3.4518738161 | -3.1898826835 | 0.9903866232  |
| H | -4.7611006578 | -1.9928706211 | 2.3362634417  |
| H | -4.2065287227 | -4.0041621453 | 0.9818251643  |
| H | -2.6213419153 | -3.5323323471 | 1.6385229812  |
| C | -3.711908671  | 0.3510692636  | 2.5199218884  |
| H | -3.06360878   | 1.2293172212  | 2.691771783   |
| H | -4.6311125689 | 0.7213460894  | 2.0243525623  |
| H | -4.005148708  | -0.0445595511 | 3.5163354252  |
| C | -1.8054178455 | -1.2507888479 | 2.5486059726  |
| H | -1.1427775586 | -0.4008708088 | 2.8095908342  |
| H | -2.1531587656 | -1.7109691892 | 3.4991610779  |
| H | -1.180981739  | -1.9880314122 | 2.0135258098  |
| C | -3.4933822124 | -1.0721359072 | -2.1881874397 |
| H | -3.7880164399 | -0.0473615073 | -2.4784275029 |
| H | -2.4824104851 | -1.2479632633 | -2.6112552128 |
| H | -4.1886249649 | -1.7799961352 | -2.6874900658 |
| C | -2.8476044071 | 1.1758064486  | -0.0229322932 |
| O | -1.1594493711 | -0.5220100643 | -0.0821319214 |
| C | 2.8538083508  | 2.2014871109  | 0.1381954266  |
| C | 2.7106795466  | 2.678998543   | -1.186680136  |
| C | 4.1438661983  | 1.8424901896  | 0.595310041   |
| C | 3.8278960636  | 2.7975592411  | -2.0263811919 |
| H | 1.7145719957  | 2.974228043   | -1.5493359698 |
| C | 5.2586084523  | 1.9567702073  | -0.2487460798 |
| H | 4.2755154052  | 1.4340428591  | 1.6089659142  |
| C | 5.1053313131  | 2.4376555147  | -1.5610030895 |
| H | 3.6991816318  | 3.1796376536  | -3.0511359306 |

|    |               |               |               |
|----|---------------|---------------|---------------|
| H  | 6.2520234984  | 1.6561919075  | 0.1188510006  |
| H  | 5.9814645633  | 2.5297423224  | -2.2223873872 |
| Zn | -0.0322909259 | 0.7871163131  | -1.2674977739 |
| C  | -0.3492265785 | 1.505112671   | -3.0979521567 |
| H  | -1.3816933102 | 1.2162773278  | -3.3979621007 |
| H  | -0.3732706413 | 2.6176319085  | -3.0287308855 |
| Zn | -0.0774621028 | -2.070920486  | -0.9424803371 |
| O  | 1.5205254573  | -0.5849409194 | -0.8628194648 |
| C  | 0.0237671545  | -2.8993788825 | -2.7646766528 |
| H  | 1.1147462977  | -3.0454253236 | -2.9313186605 |
| H  | -0.2825825742 | -2.1182392395 | -3.496296381  |
| C  | 1.776007694   | -1.1240910064 | 0.3057464283  |
| C  | 0.8647867915  | -3.274929393  | 0.6842141284  |
| H  | -0.2036294098 | -3.602060458  | 0.7489402607  |
| H  | 1.1370108232  | -3.0012535006 | 1.7209287277  |
| H  | 1.1878795101  | -0.7786748465 | 1.1847983229  |
| C  | 3.1613967575  | -1.5610846149 | 0.593696749   |
| C  | 3.5900393808  | -1.7783551927 | 1.924833243   |
| C  | 4.086760548   | -1.7374660292 | -0.4614953233 |
| C  | 4.9101051074  | -2.1704724321 | 2.1946019642  |
| H  | 2.8786829524  | -1.6303971697 | 2.7547104505  |
| C  | 5.4061075045  | -2.1298502554 | -0.1898606359 |
| H  | 3.745826645   | -1.5462553368 | -1.4901086709 |
| C  | 5.8225096162  | -2.3495079482 | 1.136991929   |
| H  | 5.2326037219  | -2.3358577734 | 3.2352188371  |
| H  | 6.1186631948  | -2.2654366934 | -1.0193603239 |
| H  | 6.8585186421  | -2.659407984  | 1.348321145   |
| C  | 0.6513963881  | 1.0633655227  | -4.1788999274 |
| H  | 1.6961302427  | 1.3475955989  | -3.9259852462 |
| H  | 0.6566535983  | -0.0396948699 | -4.3126063602 |
| H  | 0.4311592685  | 1.5064121075  | -5.1789655074 |
| C  | -0.7339681026 | -4.2044896359 | -3.0371527624 |
| H  | -0.5335204484 | -4.6075970074 | -4.0576750153 |
| H  | -0.4619950167 | -5.0112538484 | -2.3210580979 |
| H  | -1.8348592315 | -4.0753597686 | -2.9620584741 |
| C  | 1.7319954403  | -4.3918256361 | 0.1232951891  |
| H  | 1.7565010905  | -5.2780008397 | 0.799974296   |
| H  | 1.369612948   | -4.7439398097 | -0.8641292045 |



|   |              |               |               |
|---|--------------|---------------|---------------|
| H | 2.7872144888 | -4.0712964933 | -0.0111973551 |
| H | 2.7872144888 | -4.0712964933 | -0.0111973551 |

### 7.4.2 Lowest TS

TS 0055

E(RB-P86) = -5316.45212862 A.U.

First frequency = -204.5866 cm<sup>-1</sup>

|   |               |               |               |
|---|---------------|---------------|---------------|
| C | -2.4904735229 | -1.9357233608 | -0.0408701789 |
| C | -4.323222871  | -0.7542990656 | 0.9908403481  |
| C | -4.8877696602 | -1.9561046846 | 1.4441257684  |
| C | -4.2599119175 | -3.1734113946 | 1.1568233029  |
| C | -3.0737758005 | -3.1460994806 | 0.4142317552  |
| C | -1.224349311  | -2.2155490336 | -0.8153787243 |
| C | -1.2734159842 | -2.761875942  | -2.1136503206 |
| C | -0.0932001065 | -3.259454931  | -2.6881882114 |
| C | 1.0892483144  | -3.2534875683 | -1.9409003403 |
| C | 1.081396321   | -2.706857591  | -0.6360638706 |
| H | -4.8640858513 | 0.1674786862  | 1.2255683755  |
| H | -5.82480338   | -1.9297391545 | 2.0228704261  |
| H | -4.6803157835 | -4.130800205  | 1.5016480942  |
| H | -2.5648332848 | -4.0934887848 | 0.1741279243  |
| H | -2.2311990278 | -2.8176943178 | -2.6497838222 |
| H | -0.1078193205 | -3.6903622842 | -3.701950774  |
| H | 2.0071865982  | -3.7094842114 | -2.3378323688 |
| N | -0.0580089701 | -2.1665302948 | -0.1256256165 |
| C | -2.5558637092 | 0.6747083583  | -0.2835361531 |
| C | -3.2170559526 | 1.9788262346  | 0.3777980751  |
| C | -3.0478391183 | 0.8621549167  | -1.8585375292 |
| C | -4.5539924245 | 2.1121693991  | -0.4105634773 |
| C | -2.5158875246 | 3.2677838199  | -0.1761981297 |
| C | -3.8894408898 | 2.1858495349  | -1.8048835409 |
| H | -5.1009563241 | 3.0437672501  | -0.1482465542 |
| H | -5.2605346192 | 1.2678774202  | -0.3094974473 |
| H | -2.8412105735 | 4.1239227769  | 0.450761218   |
| H | -1.4126159526 | 3.2541759766  | -0.0710476821 |
| C | -2.9922932979 | 3.4238580885  | -1.6419306447 |

|    |               |               |               |
|----|---------------|---------------|---------------|
| H  | -4.5900275755 | 2.2561756133  | -2.6633409038 |
| H  | -3.585977594  | 4.3518656374  | -1.779960287  |
| H  | -2.1631169024 | 3.4648004435  | -2.3755803999 |
| C  | -4.0013682692 | -0.2397884509 | -2.3766578635 |
| H  | -3.5320822719 | -1.2408546454 | -2.3828402408 |
| H  | -4.9314489305 | -0.3236824218 | -1.7805489681 |
| H  | -4.2942004269 | -0.0047531376 | -3.422736722  |
| C  | -1.8468705558 | 0.9249851647  | -2.8125877752 |
| H  | -1.3663210222 | -0.0705047298 | -2.9016149599 |
| H  | -2.1770775928 | 1.2323711055  | -3.8287804801 |
| H  | -1.0641381557 | 1.6265327273  | -2.474906226  |
| C  | -3.1951403253 | 2.0307936374  | 1.9103523117  |
| H  | -3.6857644829 | 1.178122914   | 2.4136107026  |
| H  | -2.1413173525 | 2.0454454652  | 2.2573050908  |
| H  | -3.6771575138 | 2.9631664364  | 2.2737241968  |
| C  | -3.1164698504 | -0.679692879  | 0.2512187998  |
| O  | -1.1486433058 | 0.6407434355  | -0.115301465  |
| C  | 2.2798227457  | -2.7808508272 | 0.2405093698  |
| C  | 2.1255321257  | -2.9055268623 | 1.6420453515  |
| C  | 3.5868560648  | -2.7895181923 | -0.3017662207 |
| C  | 3.2464191219  | -3.0357089351 | 2.4746847907  |
| H  | 1.1144438267  | -2.9161409911 | 2.0755433621  |
| C  | 4.706505085   | -2.917243499  | 0.533752878   |
| H  | 3.7358154834  | -2.657278648  | -1.3843182547 |
| C  | 4.5405012085  | -3.0430387929 | 1.9243167979  |
| H  | 3.1062250767  | -3.1371254404 | 3.5622791468  |
| H  | 5.7163369693  | -2.9052536914 | 0.0950002956  |
| H  | 5.4202262286  | -3.1442582636 | 2.5796212689  |
| Zn | -0.1858745491 | -0.5498264002 | 1.3024978704  |
| C  | -0.3966996657 | -0.7022961197 | 3.2755753175  |
| H  | 0.6259179328  | -0.7246343815 | 3.7168198316  |
| H  | -0.8515016486 | 0.2441768909  | 3.6444187244  |
| Zn | 0.2854497586  | 2.0939743206  | 0.2982323161  |
| O  | 1.5617603203  | 0.3498939649  | 0.5014388006  |
| C  | 0.5734584118  | 3.3546383977  | 1.8297796939  |
| H  | -0.2758964974 | 3.2339592028  | 2.5387170172  |
| H  | 0.4850711818  | 4.3915375414  | 1.4316967092  |
| C  | 1.8044864617  | 0.5511049736  | -0.7727737476 |

|   |               |               |               |
|---|---------------|---------------|---------------|
| C | 1.2750320475  | 2.702451589   | -1.6064750678 |
| H | 0.2779627391  | 3.1988904082  | -1.7116079369 |
| H | 1.4207081723  | 2.1571516525  | -2.5575831088 |
| H | 1.0858291464  | 0.1396048416  | -1.5162703255 |
| C | 3.2137163395  | 0.627559701   | -1.2223508578 |
| C | 3.5480392068  | 0.4373289557  | -2.5843228002 |
| C | 4.2503696531  | 0.860373808   | -0.2885608679 |
| C | 4.8860339598  | 0.4861728726  | -3.0046546726 |
| H | 2.7471709354  | 0.2415098831  | -3.3170594567 |
| C | 5.5875421644  | 0.9088435642  | -0.7106791723 |
| H | 3.9791525692  | 0.9885207083  | 0.7701563567  |
| C | 5.910644423   | 0.7243485401  | -2.0685502908 |
| H | 5.1340495979  | 0.3354184692  | -4.0676571349 |
| H | 6.3872578163  | 1.0919404437  | 0.024902177   |
| H | 6.96112163    | 0.7650773326  | -2.3984483875 |
| C | -1.2184398245 | -1.9006576857 | 3.7770901604  |
| H | -0.7904197166 | -2.8763901045 | 3.4525217229  |
| H | -1.2864893762 | -1.9449682655 | 4.8898972242  |
| H | -2.2613088341 | -1.8799876204 | 3.3934088244  |
| C | 1.9061441787  | 3.1745698351  | 2.5703094995  |
| H | 2.0252684855  | 3.8940401431  | 3.4145937723  |
| H | 2.0046708806  | 2.1545058408  | 2.9979827146  |
| H | 2.7797695206  | 3.3244595334  | 1.8996021792  |
| C | 2.3616611554  | 3.7345013666  | -1.3463688128 |
| H | 2.5056561643  | 4.414749492   | -2.2183182238 |
| H | 2.1256548938  | 4.3715512166  | -0.4694253301 |
| H | 3.3483196209  | 3.2606504787  | -1.1535371444 |
| H | 3.3483196209  | 3.2606504787  | -1.1535371444 |

### 7.4.3 Additional TS with 28 conformation

TS 0087

E(RB-P86) = -5316.45156505 A.U.

First frequency = -205.2474 cm<sup>-1</sup>

|   |               |               |               |
|---|---------------|---------------|---------------|
| C | -2.4862020294 | -1.9966488714 | -0.0861528141 |
| C | -4.3455456466 | -0.783443965  | 0.8590340696  |
| C | -4.9164223159 | -1.9695905757 | 1.3443858441  |

|   |               |               |               |
|---|---------------|---------------|---------------|
| C | -4.2773452132 | -3.1941014158 | 1.1193862468  |
| C | -3.0760357038 | -3.1910992274 | 0.4007188308  |
| C | -1.205364375  | -2.2995392495 | -0.8283571091 |
| C | -1.2287521356 | -2.8832423628 | -2.1111470207 |
| C | -0.0358876356 | -3.3881656141 | -2.6520495039 |
| C | 1.1328620851  | -3.3561489893 | -1.8843315089 |
| C | 1.0972719807  | -2.7792314965 | -0.5931272537 |
| H | -4.8944715132 | 0.1447032275  | 1.0458463377  |
| H | -5.8670239456 | -1.9255245604 | 1.8994517768  |
| H | -4.7024920421 | -4.1392568836 | 1.4912516031  |
| H | -2.5607379475 | -4.1453637384 | 0.2052650878  |
| H | -2.1763728788 | -2.9605068124 | -2.662342687  |
| H | -0.0304190642 | -3.8456005687 | -3.6542043018 |
| H | 2.0601728179  | -3.8176754626 | -2.2522104495 |
| N | -0.0524846306 | -2.2287107599 | -0.1187398567 |
| C | -2.5382743991 | 0.6047583057  | -0.404941893  |
| C | -3.2240611643 | 1.9294335675  | 0.1841882641  |
| C | -2.9621612311 | 0.7417710202  | -2.0050874135 |
| C | -4.5284489971 | 2.0322075872  | -0.6605784184 |
| C | -2.5052573603 | 3.2014757414  | -0.3853885174 |
| C | -3.8083197162 | 2.0633741082  | -2.0292040205 |
| H | -5.0887564345 | 2.9691481925  | -0.4507591101 |
| H | -5.2349684064 | 1.1877272279  | -0.5599929746 |
| H | -2.8643384788 | 4.0755480958  | 0.1960031938  |
| H | -1.4072127296 | 3.2000448987  | -0.2289567593 |
| C | -2.9191235146 | 3.3073942587  | -1.8734916662 |
| H | -4.4741206304 | 2.1024783044  | -2.9167857716 |
| H | -3.5051738459 | 4.2301855301  | -2.0674750577 |
| H | -2.0600935495 | 3.3229177876  | -2.5727501197 |
| C | -3.8944998237 | -0.3757508252 | -2.5281480577 |
| H | -4.8507404909 | -0.4364707172 | -1.9717789803 |
| H | -4.1394502748 | -0.175654492  | -3.5936584841 |
| H | -3.4302258825 | -1.3773464666 | -2.4791617204 |
| C | -1.720996442  | 0.7788619948  | -2.907927855  |
| H | -1.240155049  | -0.2193410606 | -2.9520803048 |
| H | -2.0057440655 | 1.061695646   | -3.944831216  |
| H | -0.9512588751 | 1.4870696763  | -2.5533806952 |
| C | -3.2586150397 | 2.040693472   | 1.713997142   |

|    |               |               |               |
|----|---------------|---------------|---------------|
| H  | -3.7325182484 | 1.1883174594  | 2.2336912535  |
| H  | -2.219549955  | 2.1135434976  | 2.0974017947  |
| H  | -3.7907459165 | 2.9654865346  | 2.0227469743  |
| C  | -3.1204777199 | -0.7324373888 | 0.1489791806  |
| O  | -1.1402598465 | 0.5761132993  | -0.171014566  |
| C  | 2.2751869868  | -2.8407390862 | 0.3117124425  |
| C  | 2.0869707473  | -2.958486758  | 1.7097502077  |
| C  | 3.5944721217  | -2.8528641183 | -0.1995784715 |
| C  | 3.1879677937  | -3.0892654709 | 2.5688367658  |
| H  | 1.0651883035  | -2.9640564923 | 2.1182127562  |
| C  | 4.6939932419  | -2.9780555341 | 0.6626991268  |
| H  | 3.7683680493  | -2.7259779379 | -1.279077413  |
| C  | 4.4947721847  | -3.1000219527 | 2.0491322452  |
| H  | 3.0223026531  | -3.189038697  | 3.6529368959  |
| H  | 5.7139859411  | -2.9680381346 | 0.2481351075  |
| H  | 5.3584473422  | -3.2010527709 | 2.725427827   |
| Zn | -0.243740975  | -0.6103075279 | 1.3048074002  |
| C  | -0.6318191567 | -0.8053100884 | 3.248491492   |
| H  | -1.5801307771 | -0.2609998129 | 3.4578980629  |
| H  | -0.8694149196 | -1.8770809339 | 3.4432233618  |
| Zn | 0.2427633166  | 2.0464361434  | 0.3145764894  |
| O  | 1.5269677429  | 0.3051476298  | 0.6089955967  |
| C  | 0.5576998195  | 3.2427877247  | 1.8914409192  |
| H  | 1.6613908275  | 3.2119978324  | 2.0337421683  |
| H  | 0.1327503945  | 2.727905226   | 2.7822889976  |
| C  | 1.8420424675  | 0.4968018632  | -0.6501772185 |
| C  | 1.3427646896  | 2.6329328189  | -1.5373352866 |
| H  | 0.3540165953  | 3.1341087867  | -1.6919534454 |
| H  | 1.5248021349  | 2.0773514613  | -2.4764665707 |
| H  | 1.1711062892  | 0.0745738973  | -1.4308895227 |
| C  | 3.2750887335  | 0.5806058541  | -1.014264267  |
| C  | 3.6939447002  | 0.3941978442  | -2.3531730417 |
| C  | 4.2506579408  | 0.8183565332  | -0.0179822681 |
| C  | 5.0549654415  | 0.4520188486  | -2.6898950682 |
| H  | 2.941052615   | 0.195260665   | -3.1343221888 |
| C  | 5.6109658496  | 0.876136939   | -0.3565906119 |
| H  | 3.9130569488  | 0.9420245499  | 1.0220054796  |
| C  | 6.0183957119  | 0.6953491632  | -1.6920640304 |

|   |               |               |               |
|---|---------------|---------------|---------------|
| H | 5.3692000312  | 0.3044421709  | -3.7357050423 |
| H | 6.3626829893  | 1.0629603703  | 0.4271227876  |
| H | 7.0869686033  | 0.7428769955  | -1.9564598901 |
| C | 0.4691421647  | -0.3241531832 | 4.2082865783  |
| H | 1.4319195273  | -0.8553887519 | 4.0437662644  |
| H | 0.6885714481  | 0.7573118597  | 4.0781681828  |
| H | 0.2011850845  | -0.4699784464 | 5.2815336708  |
| C | 0.0698868333  | 4.6956997358  | 1.8384528477  |
| H | 0.3757773451  | 5.2801535809  | 2.7378885248  |
| H | 0.4664455584  | 5.2452266396  | 0.9561885198  |
| H | -1.0373822345 | 4.7659004254  | 1.7809825084  |
| C | 2.4232432068  | 3.6627740397  | -1.2438293491 |
| H | 2.1656198466  | 4.2993514067  | -0.3727896396 |
| H | 3.4023267146  | 3.1866539848  | -1.0224020118 |
| H | 2.5937983922  | 4.3439390503  | -2.1102714111 |
| H | 2.5937983922  | 4.3439390503  | -2.1102714111 |

TS 0090

E(RB-P86) = -5316.45165237 A.U.

First frequency = -199.8129 cm<sup>-1</sup>

|   |               |               |               |
|---|---------------|---------------|---------------|
| C | -2.4896298032 | -2.0423920102 | -0.2224052442 |
| C | -4.39749467   | -0.9211750465 | 0.738275435   |
| C | -4.9406087257 | -2.1411152598 | 1.1684276284  |
| C | -4.2626787347 | -3.3371525295 | 0.9068998419  |
| C | -3.0511079136 | -3.2714236414 | 0.2089189018  |
| C | -1.1871569908 | -2.2802668981 | -0.9503318365 |
| C | -1.1685891005 | -2.8136911669 | -2.254792567  |
| C | 0.0475628282  | -3.2717195306 | -2.7857405902 |
| C | 1.1981254684  | -3.2421871211 | -1.9908162495 |
| C | 1.1216010935  | -2.7118736302 | -0.6812992486 |
| H | -4.9763836999 | -0.0173935238 | 0.9516533683  |
| H | -5.9003112232 | -2.1458518801 | 1.7093909844  |
| H | -4.6653842743 | -4.3079030602 | 1.235268581   |
| H | -2.5043941551 | -4.2019327443 | -0.0137758052 |
| H | -2.1017538948 | -2.8909471388 | -2.8301552407 |
| H | 0.0859850798  | -3.6914760783 | -3.8035543634 |
| H | 2.143428555   | -3.669052176  | -2.3546459773 |

|   |               |               |               |
|---|---------------|---------------|---------------|
| N | -0.0517661171 | -2.2078780166 | -0.2132190768 |
| C | -2.6152469992 | 0.5667760715  | -0.4458981815 |
| C | -3.3439051869 | 1.8481357744  | 0.187739484   |
| C | -3.0317127645 | 0.7532393201  | -2.0428997955 |
| C | -4.6435234261 | 1.9487121757  | -0.6644335773 |
| C | -2.650665962  | 3.1584123917  | -0.32590006   |
| C | -3.9139281088 | 2.0514677679  | -2.0239466343 |
| H | -5.229677316  | 2.8622138593  | -0.4240458958 |
| H | -5.3287462941 | 1.0832656637  | -0.6020097174 |
| H | -3.0236136376 | 4.0020137673  | 0.2913878044  |
| H | -1.5533323394 | 3.1690381845  | -0.172879134  |
| C | -3.0634133786 | 3.3139292863  | -1.8106979023 |
| H | -4.5732575427 | 2.1065286485  | -2.915545652  |
| H | -3.6779878329 | 4.2249799437  | -1.9689739226 |
| H | -2.2027601003 | 3.3863254886  | -2.5046026729 |
| C | -3.9283429292 | -0.3697337115 | -2.6149461746 |
| H | -4.1738313019 | -0.1348403776 | -3.6731798404 |
| H | -3.4342782803 | -1.3584321437 | -2.6028072689 |
| H | -4.8850644054 | -0.4810639514 | -2.0673976287 |
| C | -1.7875284914 | 0.8573815196  | -2.9357422055 |
| H | -2.0759633673 | 1.1622997266  | -3.9653420605 |
| H | -1.042908324  | 1.5788677361  | -2.5563520547 |
| H | -1.2740176908 | -0.1228604391 | -3.0068517028 |
| C | -3.4002532476 | 1.894932653   | 1.7196419943  |
| H | -3.9326195265 | 2.8085671001  | 2.0596648906  |
| H | -3.8858016946 | 1.0240259252  | 2.1959778876  |
| H | -2.3668309263 | 1.9463040999  | 2.1203727864  |
| C | -3.16404344   | -0.8070291546 | 0.0502623111  |
| O | -1.2179627594 | 0.5675561666  | -0.2008817025 |
| C | 2.2827268472  | -2.768999885  | 0.2455598186  |
| C | 2.0706232192  | -2.9125054184 | 1.6378399061  |
| C | 3.6119087874  | -2.7437034192 | -0.2392555385 |
| C | 3.1572829854  | -3.0303999045 | 2.5166907558  |
| H | 1.0418059422  | -2.9469238771 | 2.0263515206  |
| C | 4.6970781537  | -2.8570744095 | 0.6426225105  |
| H | 3.8048488832  | -2.5967256097 | -1.3129131036 |
| C | 4.473909268   | -3.0036530193 | 2.0229987491  |
| H | 2.9725759524  | -3.1490025326 | 3.5958230062  |

|    |               |               |               |
|----|---------------|---------------|---------------|
| H  | 5.7244289381  | -2.8178716398 | 0.2484445721  |
| H  | 5.3264499382  | -3.0943282353 | 2.7147204131  |
| Zn | -0.3238189573 | -0.6363791038 | 1.2544715592  |
| C  | -0.7687735471 | -0.9335431542 | 3.1730698711  |
| H  | -1.7941659473 | -0.5345301854 | 3.3428826242  |
| H  | -0.8620283402 | -2.0330384843 | 3.333607493   |
| Zn | 0.1480904821  | 2.0528595216  | 0.3151910617  |
| O  | 1.4440429995  | 0.3400656895  | 0.6223222175  |
| C  | 0.3089910472  | 3.3509550692  | 1.8353710157  |
| H  | -0.5237934207 | 3.1545038308  | 2.5475070569  |
| H  | 0.1145838919  | 4.3680217701  | 1.4239268761  |
| C  | 1.7894654513  | 0.5532396275  | -0.626712497  |
| C  | 1.2322411186  | 2.6763364116  | -1.5314280206 |
| H  | 0.2236316741  | 3.1244138246  | -1.7133103611 |
| H  | 1.4641757256  | 2.1171284862  | -2.4568919494 |
| H  | 1.157413592   | 0.1124398008  | -1.4291940686 |
| C  | 3.2271302305  | 0.6954086213  | -0.9512011325 |
| C  | 3.6869520955  | 0.528950851   | -2.2794156252 |
| C  | 4.1671579195  | 0.9684190432  | 0.0697919935  |
| C  | 5.0528027927  | 0.6399401469  | -2.5813740878 |
| H  | 2.9625938818  | 0.3024383852  | -3.0798024166 |
| C  | 5.5324656882  | 1.0780480368  | -0.233911647  |
| H  | 3.7998327711  | 1.0794966375  | 1.1009733993  |
| C  | 5.9805385328  | 0.9165652519  | -1.5588263767 |
| H  | 5.3987501757  | 0.5075392354  | -3.6191685138 |
| H  | 6.2560904416  | 1.2913644795  | 0.5691948062  |
| H  | 7.0528907035  | 1.0056781171  | -1.7956917393 |
| C  | 0.2037410673  | -0.3300406286 | 4.1994802606  |
| H  | 1.2400989382  | -0.7120429875 | 4.0711263861  |
| H  | 0.2670057805  | 0.7753264299  | 4.1075985247  |
| H  | -0.0898956498 | -0.5465316217 | 5.2539112077  |
| C  | 1.6530556276  | 3.3219886785  | 2.5768316533  |
| H  | 1.8559763202  | 2.3260392257  | 3.0241982145  |
| H  | 2.5073738106  | 3.5474567527  | 1.9028299912  |
| H  | 1.6976175745  | 4.065303695   | 3.407563698   |
| C  | 2.2534916413  | 3.7612985291  | -1.2273675036 |
| H  | 3.2416456654  | 3.3369708966  | -0.946561486  |
| H  | 2.4343692269  | 4.4192137987  | -2.1095551435 |



|   |              |              |               |
|---|--------------|--------------|---------------|
| H | 1.9262839741 | 4.4151845731 | -0.3932901262 |
| H | 1.9262839741 | 4.4151845731 | -0.3932901262 |

TS 0108

E(RB-P86) = -5316.44693840 A.U.

First frequency = -211.9843  $\text{cm}^{-1}$

|   |               |               |               |
|---|---------------|---------------|---------------|
| C | -2.5041820729 | -1.9576654338 | 0.1075736588  |
| C | -4.3491197905 | -0.8135420265 | 1.1589311068  |
| C | -4.9035692703 | -2.0280220079 | 1.5864704417  |
| C | -4.264363933  | -3.2346943312 | 1.2740261808  |
| C | -3.0758867536 | -3.1836322811 | 0.5377809572  |
| C | -1.2384364788 | -2.203598751  | -0.6734064946 |
| C | -1.3256334206 | -2.7160025555 | -1.9844799693 |
| C | -0.187906729  | -3.2949805373 | -2.5654193773 |
| C | 0.9857487722  | -3.3909836302 | -1.8113363148 |
| C | 1.0232015228  | -2.8299385155 | -0.5122558358 |
| H | -4.8901952754 | 0.1021970792  | 1.4178473831  |
| H | -5.8401304608 | -2.0221945431 | 2.1665202053  |
| H | -4.6775906626 | -4.2019351876 | 1.5997071915  |
| H | -2.5551869409 | -4.1208827067 | 0.2838311184  |
| H | -2.2896613435 | -2.6970893423 | -2.5133567493 |
| H | -0.2318343926 | -3.7132670963 | -3.5835328456 |
| H | 1.8617326775  | -3.9225112182 | -2.2083436049 |
| N | -0.0658903759 | -2.2074704265 | 0.0114328134  |
| C | -2.5907270144 | 0.6402866528  | -0.0902846836 |
| C | -3.0692733179 | 1.8935682321  | 0.8031509895  |
| C | -3.2616172081 | 1.0230437291  | -1.5453156671 |
| C | -4.4467303184 | 2.2600509253  | 0.1759136867  |
| C | -2.2569454737 | 3.1407477517  | 0.3446178728  |
| C | -3.9089781803 | 2.4229618287  | -1.2611755021 |
| H | -4.8423775775 | 3.2116691974  | 0.5926951668  |
| H | -5.2463503695 | 1.5015709533  | 0.2640736061  |
| H | -2.4099174259 | 3.9540520384  | 1.0848225658  |
| H | -1.1712884021 | 2.9325993061  | 0.3228049205  |
| C | -2.8435240086 | 3.5174232058  | -1.0435570985 |
| H | -4.6658980444 | 2.685360396   | -2.0302384209 |
| H | -3.3283100717 | 4.5159885625  | -1.0228780667 |

|    |               |               |               |
|----|---------------|---------------|---------------|
| H  | -2.0777511067 | 3.5546535958  | -1.8390547763 |
| C  | -4.3833482688 | 0.054472512   | -1.9902974926 |
| H  | -4.005200366  | -0.9773066883 | -2.1373032279 |
| H  | -5.2202288789 | -0.0092756298 | -1.2683328373 |
| H  | -4.803392573  | 0.3987756907  | -2.9595237433 |
| C  | -2.2274652134 | 1.0401404818  | -2.6802185086 |
| H  | -1.7938914811 | 0.0315771801  | -2.839109149  |
| H  | -2.7105036566 | 1.3533684414  | -3.6304306848 |
| H  | -1.3906712269 | 1.7465790042  | -2.5045868743 |
| C  | -2.9520638249 | 1.744737185   | 2.3228563114  |
| H  | -3.4767466882 | 0.8676544129  | 2.7458632333  |
| H  | -1.8852860465 | 1.655380624   | 2.6161520723  |
| H  | -3.3527179143 | 2.6523050662  | 2.8229741895  |
| C  | -3.1446679108 | -0.7211650429 | 0.4152448302  |
| O  | -1.1750954433 | 0.5134397609  | -0.1346495114 |
| C  | 2.2346194272  | -2.9641873529 | 0.3450453472  |
| C  | 2.1116758081  | -2.948946199  | 1.7552148025  |
| C  | 3.5223826265  | -3.1469783794 | -0.2184332787 |
| C  | 3.2409563972  | -3.1036738557 | 2.5737496547  |
| H  | 1.1163718477  | -2.8214506889 | 2.2042605194  |
| C  | 4.6495432549  | -3.3016816541 | 0.6027598295  |
| H  | 3.6514040931  | -3.1411041637 | -1.311906966  |
| C  | 4.5135320459  | -3.2799994139 | 2.0027199689  |
| H  | 3.1226785888  | -3.0908721307 | 3.6686010011  |
| H  | 5.6431939729  | -3.4331473481 | 0.1459204113  |
| H  | 5.3990457997  | -3.39982853   | 2.6466820303  |
| Zn | -0.2618318711 | -0.3916026048 | 1.4457165879  |
| C  | -0.4091825358 | -0.8283147746 | 3.3857916168  |
| H  | 0.6335399102  | -0.9555259106 | 3.7593052058  |
| H  | -0.788119699  | 0.0763125774  | 3.9118159135  |
| Zn | 0.3704554266  | 1.590212029   | -1.0232782956 |
| O  | 1.3058361792  | 0.9171543721  | 0.9339671861  |
| C  | 0.7292495793  | 3.4960498399  | -1.6018131361 |
| H  | 1.8301124425  | 3.5906727342  | -1.4690674381 |
| H  | 0.2827336337  | 4.196366179   | -0.8617005691 |
| C  | 2.3329010377  | 0.5430420152  | 0.2282118414  |
| C  | 1.7182680074  | 0.1999204457  | -2.14771721   |
| H  | 0.7222163284  | -0.0366378781 | -2.6033998333 |

|   |               |               |               |
|---|---------------|---------------|---------------|
| H | 2.1243718768  | -0.7892145674 | -1.8666958111 |
| H | 2.5534123028  | -0.5373040377 | 0.1343369711  |
| C | 3.5102396307  | 1.425228707   | 0.1062119207  |
| C | 4.7186464761  | 0.9294726445  | -0.4409474524 |
| C | 3.4723966682  | 2.7525831181  | 0.5980902998  |
| C | 5.8574748353  | 1.7462531647  | -0.5104703804 |
| H | 4.7622241125  | -0.112982024  | -0.7956924723 |
| C | 4.611257129   | 3.5662200606  | 0.5261808022  |
| H | 2.539194015   | 3.1192783444  | 1.0510793238  |
| C | 5.8051303116  | 3.0685697969  | -0.031750253  |
| H | 6.7935045254  | 1.3497840659  | -0.9351962027 |
| H | 4.5734690544  | 4.5968140822  | 0.9138398371  |
| H | 6.6992016628  | 3.7101746907  | -0.085034168  |
| C | -1.2624585521 | -2.0465760459 | 3.7667017893  |
| H | -0.9123159412 | -2.9808834979 | 3.2722589243  |
| H | -1.2627944964 | -2.2511447762 | 4.8634508599  |
| H | -2.3236725206 | -1.9210809761 | 3.4625125774  |
| C | 0.3677164191  | 3.9481472856  | -3.026160095  |
| H | 0.7135861262  | 4.986784543   | -3.2396418928 |
| H | 0.8214939702  | 3.3009288651  | -3.8075667054 |
| H | -0.7269351513 | 3.9414832669  | -3.2197339901 |
| C | 2.6221076855  | 0.9107332789  | -3.1430140141 |
| H | 2.9024355692  | 0.2564575997  | -4.003129228  |
| H | 2.1499559872  | 1.8191020949  | -3.5668107926 |
| H | 3.5782021725  | 1.2375551765  | -2.6779469716 |
| H | 3.5782021725  | 1.2375551765  | -2.6779469716 |

TS 0124

E(RB-P86) = -5316.44658822 A.U.

First frequency = -190.1436 cm<sup>-1</sup>

|   |               |               |               |
|---|---------------|---------------|---------------|
| C | -2.4551339098 | -1.9638153717 | -0.082749765  |
| C | -4.2989930603 | -0.8773229641 | 1.0266358782  |
| C | -4.8280212073 | -2.1115289239 | 1.4309262827  |
| C | -4.1811518835 | -3.2996649855 | 1.0706489463  |
| C | -3.0038793934 | -3.2091135762 | 0.3201142921  |
| C | -1.1678806281 | -2.1775433455 | -0.8390708285 |
| C | -1.1761770675 | -2.6820196737 | -2.1543365498 |

|   |               |               |               |
|---|---------------|---------------|---------------|
| C | 0.0134386665  | -3.2022567309 | -2.6883533845 |
| C | 1.1590487225  | -3.2543719729 | -1.8875817594 |
| C | 1.1166652103  | -2.7163088562 | -0.5785805891 |
| H | -4.851706573  | 0.0196183669  | 1.3208955174  |
| H | -5.7527517396 | -2.1341452327 | 2.0292146016  |
| H | -4.5764371597 | -4.2819507935 | 1.372513609   |
| H | -2.4714950924 | -4.1309801036 | 0.0357746055  |
| H | -2.1138713259 | -2.700953784  | -2.7280665048 |
| H | 0.0318842811  | -3.611188285  | -3.7110221218 |
| H | 2.0742620874  | -3.7412692252 | -2.2525261171 |
| N | -0.0261833774 | -2.1504556209 | -0.1053062224 |
| C | -2.6134194213 | 0.6429180464  | -0.248805742  |
| C | -3.2502313477 | 1.8907070278  | 0.5360918836  |
| C | -3.2279112811 | 0.9020202392  | -1.7660177364 |
| C | -4.6375760421 | 2.0554588525  | -0.155334813  |
| C | -2.58665186   | 3.2070414499  | 0.0217518101  |
| C | -4.0658201041 | 2.2152570979  | -1.5815735633 |
| H | -5.1641926245 | 2.9687522464  | 0.1973016624  |
| H | -5.3399891509 | 1.2070823622  | -0.0617231623 |
| H | -2.8663830277 | 4.0284253729  | 0.7139624552  |
| H | -1.4833536485 | 3.1529932202  | 0.051066401   |
| C | -3.1599153946 | 3.4470712408  | -1.398982174  |
| H | -4.8198424291 | 2.3314076278  | -2.3884299357 |
| H | -3.7657884137 | 4.376266887   | -1.4435198694 |
| H | -2.3787078738 | 3.5426003848  | -2.1792173953 |
| C | -4.197045337  | -0.1966145572 | -2.2622415402 |
| H | -3.7030865585 | -1.1836172887 | -2.35341655   |
| H | -5.0743982252 | -0.3349934386 | -1.6007189292 |
| H | -4.5769764737 | 0.0799433564  | -3.2692070437 |
| C | -2.1167802951 | 1.0267405636  | -2.8133297662 |
| H | -1.6018416547 | 0.0563744384  | -2.9584668459 |
| H | -2.5419709985 | 1.3377030459  | -3.7919626063 |
| H | -1.3417071293 | 1.7646222013  | -2.5365453943 |
| C | -3.1396471825 | 1.853192497   | 2.0645806011  |
| H | -3.6490946258 | 2.7352738242  | 2.5075871257  |
| H | -3.5557402466 | 0.9470077968  | 2.5422278025  |
| H | -2.0708263397 | 1.9077341514  | 2.3587706899  |
| C | -3.1113462474 | -0.7417139515 | 0.2630649183  |

|    |               |               |               |
|----|---------------|---------------|---------------|
| O  | -1.1897507824 | 0.6129095359  | -0.1916798832 |
| C  | 2.2806453111  | -2.8231866012 | 0.3434460819  |
| C  | 2.07608714    | -2.8687554742 | 1.7430304233  |
| C  | 3.6042173253  | -2.9258100139 | -0.1494507944 |
| C  | 3.1617495826  | -3.0115423113 | 2.6199150737  |
| H  | 1.0526866196  | -2.8051469751 | 2.1404309471  |
| C  | 4.6884181559  | -3.0660155873 | 0.7290839617  |
| H  | 3.7958580455  | -2.866665665  | -1.2320270305 |
| C  | 4.4710026365  | -3.1107372654 | 2.1177268647  |
| H  | 2.9805311174  | -3.0486036939 | 3.7055006943  |
| H  | 5.7115669342  | -3.1281581159 | 0.3267313273  |
| H  | 5.3228536889  | -3.2190799153 | 2.8075659747  |
| Zn | -0.239827335  | -0.4705764867 | 1.3064974472  |
| C  | -0.4731908756 | -0.6825476585 | 3.2738464672  |
| H  | 0.5497734491  | -0.7317706895 | 3.7132251797  |
| H  | -0.9123214308 | 0.2585987042  | 3.6737017801  |
| Zn | 0.3272786798  | 1.9804738665  | -0.4900283762 |
| O  | 1.4975256852  | 0.5260318332  | 0.668153261   |
| C  | 0.8475819742  | 3.826900326   | 0.1240897515  |
| H  | 0.296983936   | 4.5698505821  | -0.497337243  |
| H  | 1.9153768122  | 3.9246577384  | -0.1757882886 |
| C  | 2.2344101656  | 0.408841071   | -0.4024870891 |
| C  | 1.503860062   | 1.6363421337  | -2.3758994251 |
| H  | 2.4565735705  | 2.1984435268  | -2.3629505517 |
| H  | 0.7232000971  | 2.376497421   | -2.6808418215 |
| H  | 2.0597628406  | -0.4428093804 | -1.0909827519 |
| C  | 3.61347254    | 0.9505115695  | -0.3721379926 |
| C  | 4.5659306761  | 0.5949928086  | -1.3576380235 |
| C  | 4.0061238717  | 1.8178884026  | 0.6751377619  |
| C  | 5.8707440531  | 1.1071017707  | -1.3076911557 |
| H  | 4.2783137388  | -0.0916773998 | -2.1697049951 |
| C  | 5.3114776195  | 2.3274324419  | 0.7239231343  |
| H  | 3.2660666708  | 2.072497445   | 1.448024504   |
| C  | 6.2475351935  | 1.9778452825  | -0.2677520457 |
| H  | 6.6017758216  | 0.8228635907  | -2.0815467663 |
| H  | 5.6046530348  | 3.0027686078  | 1.5436484805  |
| H  | 7.2726685995  | 2.3796268878  | -0.2279597651 |
| C  | -1.3103961807 | -1.882940024  | 3.7421619806  |

|   |               |               |               |
|---|---------------|---------------|---------------|
| H | -2.3526681539 | -1.8374962275 | 3.3591605466  |
| H | -0.8964140768 | -2.8544567523 | 3.3882983491  |
| H | -1.3787606716 | -1.958400437  | 4.8532479958  |
| C | 0.6890579838  | 4.1512376133  | 1.6149251212  |
| H | 1.038483588   | 5.1792532456  | 1.8723495482  |
| H | -0.3692571381 | 4.0864599322  | 1.9501361598  |
| H | 1.2632466622  | 3.448758891   | 2.2573566687  |
| C | 1.4954381234  | 0.476664025   | -3.3594565381 |
| H | 2.3458983582  | -0.2226089718 | -3.2067960094 |
| H | 0.567886415   | -0.1284305523 | -3.2810889208 |
| H | 1.5670481123  | 0.8196225815  | -4.4185697522 |
| H | 1.5670481123  | 0.8196225815  | -4.4185697522 |

TS 0131

E(RB-P86) = -5316.44696622 A.U.

First frequency = -200.9142 cm<sup>-1</sup>

|   |               |               |               |
|---|---------------|---------------|---------------|
| C | -2.4525419368 | -1.9599651974 | -0.0176646267 |
| C | -4.2923708661 | -0.7663983328 | 0.9876554044  |
| C | -4.8546522083 | -1.9621698635 | 1.4592558267  |
| C | -4.224627721  | -3.1827478442 | 1.1908167079  |
| C | -3.03462963   | -3.1644226384 | 0.4542459926  |
| C | -1.1690654825 | -2.2470391692 | -0.7601983754 |
| C | -1.1811097027 | -2.8213800042 | -2.0467768347 |
| C | 0.0150237829  | -3.3342901073 | -2.5735501046 |
| C | 1.1744838973  | -3.3148249474 | -1.7910190921 |
| C | 1.130421254   | -2.7350794371 | -0.5009232242 |
| H | -4.8343189133 | 0.1579048592  | 1.2093483989  |
| H | -5.7919227469 | -1.9286134252 | 2.0372156571  |
| H | -4.6446846959 | -4.1355379287 | 1.5485590619  |
| H | -2.520365263  | -4.113890843  | 0.2345930937  |
| H | -2.1226734399 | -2.88836677   | -2.6097996694 |
| H | 0.0297427107  | -3.7887489239 | -3.5769742578 |
| H | 2.101103407   | -3.7854475533 | -2.1489203554 |
| N | -0.0222125645 | -2.179588583  | -0.0395238187 |
| C | -2.534556021  | 0.6409249462  | -0.323709479  |
| C | -3.2007052094 | 1.9577682759  | 0.3035238915  |
| C | -3.0307168898 | 0.7845604642  | -1.9005992013 |

|    |               |               |               |
|----|---------------|---------------|---------------|
| C  | -4.5440248466 | 2.0569285935  | -0.4794148785 |
| C  | -2.5110228655 | 3.233762362   | -0.2935950344 |
| C  | -3.8895289612 | 2.0986154502  | -1.8791700964 |
| H  | -5.0976710747 | 2.9904402314  | -0.2388328942 |
| H  | -5.2421598212 | 1.2095520289  | -0.3507409563 |
| H  | -2.8262475113 | 4.1056663262  | 0.3163680059  |
| H  | -1.4060308206 | 3.218128663   | -0.2033180114 |
| C  | -3.00666199   | 3.3512130413  | -1.7562831433 |
| H  | -4.5959670847 | 2.1355804609  | -2.7348704849 |
| H  | -3.6151464152 | 4.2675608576  | -1.9071700487 |
| H  | -2.1864754646 | 3.3870709076  | -2.4996213369 |
| C  | -3.9647922291 | -0.3427413701 | -2.397592469  |
| H  | -3.4815823498 | -1.3372237193 | -2.376874397  |
| H  | -4.8975605162 | -0.4250407739 | -1.8052661687 |
| H  | -4.2542226746 | -0.1367614004 | -3.4507138209 |
| C  | -1.8243610681 | 0.8475400139  | -2.8445268478 |
| H  | -2.1430966336 | 1.1454877961  | -3.8670565949 |
| H  | -1.0539570841 | 1.5581405016  | -2.4959583156 |
| H  | -1.3303306796 | -0.1424878168 | -2.9174969394 |
| C  | -3.1701908546 | 2.0542375852  | 1.8335400441  |
| H  | -3.6671489953 | 2.9877829701  | 2.1730591326  |
| H  | -3.6423856313 | 1.2071731134  | 2.3635017193  |
| H  | -2.1149235347 | 2.0979129012  | 2.1733706884  |
| C  | -3.0859369274 | -0.7017771588 | 0.2464440714  |
| O  | -1.1245244576 | 0.6136033945  | -0.1599610304 |
| C  | 2.3004668677  | -2.7873072439 | 0.4149472511  |
| C  | 2.101885313   | -2.8508784251 | 1.8150283419  |
| C  | 3.6240800671  | -2.8302605917 | -0.0839980245 |
| C  | 3.1950953777  | -2.951619745  | 2.6875715025  |
| H  | 1.0779827745  | -2.8361910758 | 2.2169097853  |
| C  | 4.7162691937  | -2.9262144461 | 0.7909287956  |
| H  | 3.8091753721  | -2.750365055  | -1.1658463487 |
| C  | 4.5057696423  | -2.988961308  | 2.1797033479  |
| H  | 3.0197685634  | -3.0049435881 | 3.7734808757  |
| H  | 5.7393490971  | -2.9386772499 | 0.384175186   |
| H  | 5.3638445355  | -3.0646379895 | 2.8663668448  |
| Zn | -0.1951930831 | -0.516490453  | 1.3292325289  |
| C  | -0.4396570694 | -0.5884633613 | 3.3030421672  |

|    |               |               |               |
|----|---------------|---------------|---------------|
| H  | 0.5772765797  | -0.5912477195 | 3.7578020381  |
| H  | -0.8979528645 | 0.3735667948  | 3.6241208533  |
| Zn | 0.3004949487  | 2.0804263486  | 0.1839040211  |
| O  | 1.5722696645  | 0.3666588159  | 0.5648782425  |
| C  | 0.6124969597  | 3.39606893    | 1.6724409738  |
| H  | 1.5534525759  | 3.068134538   | 2.1673367377  |
| H  | -0.1876018384 | 3.2693399242  | 2.4353419273  |
| C  | 1.9719846584  | 0.5151874592  | -0.6726813749 |
| C  | 1.5366474092  | 2.7171065655  | -1.5794674386 |
| H  | 2.4847774041  | 3.1027531339  | -1.1555638399 |
| H  | 0.7824367155  | 3.5315351979  | -1.4365075051 |
| H  | 1.363367569   | 0.0751490171  | -1.4954471417 |
| C  | 3.4307312593  | 0.6088855674  | -0.9207724856 |
| C  | 3.9946824967  | 0.1622109916  | -2.1395006097 |
| C  | 4.2928838486  | 1.0908683277  | 0.0933914733  |
| C  | 5.3827296112  | 0.2197928146  | -2.3503460444 |
| H  | 3.3382999868  | -0.2584116433 | -2.9185848566 |
| C  | 5.6763398216  | 1.1515552357  | -0.1198630069 |
| H  | 3.8498136415  | 1.408662707   | 1.0492904723  |
| C  | 6.2270067015  | 0.7208796158  | -1.3436411965 |
| H  | 5.8082619517  | -0.1331226259 | -3.3035438218 |
| H  | 6.3363432605  | 1.5355613611  | 0.6745519325  |
| H  | 7.3151969454  | 0.7707052761  | -1.5089844566 |
| C  | -1.2693182458 | -1.7633476801 | 3.8447913775  |
| H  | -0.8363245585 | -2.7524786015 | 3.5714759186  |
| H  | -1.3551284631 | -1.7575484976 | 4.9572431622  |
| H  | -2.3059631162 | -1.7606857423 | 3.4439463803  |
| C  | 0.7179824233  | 4.8651660069  | 1.2468440922  |
| H  | 1.5378971218  | 5.0325695649  | 0.514169046   |
| H  | -0.2154829068 | 5.2349111947  | 0.7667265755  |
| H  | 0.9192815052  | 5.5487848126  | 2.1052885897  |
| C  | 1.6289057207  | 2.4148619307  | -3.0659982677 |
| H  | 0.6844154971  | 1.9998095396  | -3.4755851111 |
| H  | 1.8531135489  | 3.3340634664  | -3.6564077062 |
| H  | 2.4390889579  | 1.6967891454  | -3.3062297368 |
| H  | 2.4390889579  | 1.6967891454  | -3.3062297368 |



#### 7.4.4 Additional TS with 26 conformation<sup>2</sup>

TS 0001

E(RB-P86) = -5316.45414117 A.U.

First frequency = -194.1627 cm<sup>-1</sup>

|   |               |               |               |
|---|---------------|---------------|---------------|
| C | -2.5910527288 | -1.6555247413 | 0.5525310278  |
| C | -3.9625429561 | -0.0419253154 | 1.7161412131  |
| C | -4.638462474  | -1.0599043401 | 2.4037636576  |
| C | -4.3048958871 | -2.3995675255 | 2.1672973358  |
| C | -3.2916215032 | -2.6785167918 | 1.243167827   |
| C | -1.559506924  | -2.2317978691 | -0.384557564  |
| C | -1.9817316365 | -2.9439051206 | -1.525842253  |
| C | -1.0432531156 | -3.7006030976 | -2.2438392904 |
| C | 0.280530177   | -3.7485618116 | -1.7960454919 |
| C | 0.6528862532  | -3.001067635  | -0.6540461998 |
| H | -4.2716555228 | 0.9898514269  | 1.9150331272  |
| H | -5.4304451803 | -0.7964870308 | 3.1228357055  |
| H | -4.8197266846 | -3.2182424452 | 2.6937038776  |
| H | -3.012624393  | -3.7260274767 | 1.0460865685  |
| H | -3.040555729  | -2.9179469417 | -1.8218429304 |
| H | -1.3509948241 | -4.2705469819 | -3.1348092308 |
| H | 1.0267641406  | -4.3751799578 | -2.3045742313 |
| N | -0.2619523617 | -2.2517346725 | 0.0142985755  |
| C | -2.2605358207 | 0.880328367   | -0.009650445  |
| C | -2.3319028086 | 2.3137511123  | 0.7266491113  |
| C | -3.1320245287 | 1.2007348751  | -1.3739500956 |
| C | -3.7056930086 | 2.884657942   | 0.2767735507  |
| C | -1.3893515125 | 3.2686336875  | -0.0691444908 |
| C | -3.4351144847 | 2.7323372329  | -1.2343847816 |
| H | -3.827257514  | 3.9460913146  | 0.5844291063  |
| H | -4.6002019975 | 2.3339158913  | 0.623875467   |
| H | -1.219645619  | 4.1872369181  | 0.5302200888  |
| H | -0.4022745818 | 2.7998248918  | -0.2270907761 |
| C | -2.1567234039 | 3.5854421069  | -1.3841325505 |

---

<sup>2</sup>An inversion of the two ethyl groups is observed at the reactive Zn centre during the CREST process. Following the application of DFT optimisation, some TSs were observed to adopt a conformation corresponding to **26**.

|    |               |               |               |
|----|---------------|---------------|---------------|
| H  | -4.261511109  | 3.0477406049  | -1.9057959813 |
| H  | -2.4274205497 | 4.6602887479  | -1.4467303155 |
| H  | -1.5788235114 | 3.3586385352  | -2.3024678653 |
| C  | -4.4801109365 | 0.4439740125  | -1.4453038576 |
| H  | -5.0231752902 | 0.7483542571  | -2.3655449622 |
| H  | -4.333986091  | -0.6539942162 | -1.4910748837 |
| H  | -5.1452815291 | 0.6455557725  | -0.5839473076 |
| C  | -2.3727295102 | 0.8467071369  | -2.6563367279 |
| H  | -1.4180411229 | 1.3970994279  | -2.774083219  |
| H  | -2.1352395576 | -0.2348361399 | -2.7026293797 |
| H  | -2.990256367  | 1.0995561937  | -3.5448095804 |
| C  | -1.9677797569 | 2.3471759316  | 2.2126573437  |
| H  | -0.924686599  | 1.9989404295  | 2.3560465834  |
| H  | -2.0239237575 | 3.3889585787  | 2.5941484846  |
| H  | -2.6063385757 | 1.7163685763  | 2.858982798   |
| C  | -2.9250307342 | -0.2827420359 | 0.7805740809  |
| O  | -0.918176102  | 0.4952074254  | -0.2531505347 |
| C  | 2.0414031515  | -3.0606458595 | -0.1247864716 |
| C  | 3.1470465422  | -3.1585181005 | -1.0016791471 |
| C  | 2.2757385626  | -3.0594354302 | 1.2696274202  |
| C  | 4.4530412968  | -3.2465311212 | -0.4959607074 |
| H  | 2.9842576332  | -3.1272966898 | -2.0904103327 |
| C  | 3.5819592233  | -3.1544337252 | 1.7728928869  |
| H  | 1.4215402732  | -2.9970388919 | 1.9605061007  |
| C  | 4.6748505897  | -3.2471672199 | 0.8929950576  |
| H  | 5.304930096   | -3.3063173733 | -1.1918579433 |
| H  | 3.7465748286  | -3.1587658024 | 2.8619053302  |
| H  | 5.7002272762  | -3.3183401777 | 1.2894002471  |
| Zn | 0.121116266   | -0.4721890769 | 1.2404878197  |
| C  | 0.2290681293  | -0.615842422  | 3.2294234514  |
| H  | 1.3067522926  | -0.7562090889 | 3.4767257348  |
| H  | -0.0520491829 | 0.3526414507  | 3.7003275533  |
| Zn | 0.5232299253  | 0.6711765186  | -1.7146336833 |
| O  | 1.7543248472  | 0.0179755559  | 0.0318345151  |
| C  | 0.9053123695  | -0.4193681891 | -3.3597523522 |
| H  | 0.3977018978  | -1.4022734094 | -3.2487553101 |
| H  | 1.9972955347  | -0.6394481442 | -3.3136491444 |
| C  | 2.5441259331  | 1.0087681129  | -0.238164748  |

|   |               |               |               |
|---|---------------|---------------|---------------|
| C | 1.5964942411  | 2.642756987   | -1.7985857686 |
| H | 1.6550175986  | 3.3743904654  | -0.9707109175 |
| H | 0.6335630893  | 2.8687635705  | -2.3243624479 |
| H | 3.2702054179  | 0.854795505   | -1.0682146455 |
| C | 2.9762893106  | 1.9968843164  | 0.7760103377  |
| C | 4.181958536   | 2.7141937921  | 0.5789260886  |
| C | 2.2366305188  | 2.2286408592  | 1.9596974209  |
| C | 4.6256698845  | 3.646963202   | 1.5281832957  |
| H | 4.7831849546  | 2.5224106199  | -0.3244175876 |
| C | 2.6810274139  | 3.1592329382  | 2.9087378752  |
| H | 1.309883854   | 1.6613674191  | 2.1330332329  |
| C | 3.8748993492  | 3.8750236727  | 2.6959090798  |
| H | 5.5675845468  | 4.1934152385  | 1.3611875444  |
| H | 2.0931180434  | 3.3261383713  | 3.8252072284  |
| H | 4.2231128994  | 4.6052239178  | 3.4437810386  |
| C | -0.6079883813 | -1.7437827245 | 3.8542847572  |
| H | -1.6958406305 | -1.5937062011 | 3.6866579977  |
| H | -0.3653438105 | -2.7414922503 | 3.4234472829  |
| H | -0.460408531  | -1.8328215215 | 4.9563795329  |
| C | 0.5552492983  | 0.1944604867  | -4.7226866663 |
| H | -0.5364427502 | 0.3704023998  | -4.8363761457 |
| H | 1.0489148315  | 1.1776987123  | -4.885826236  |
| H | 0.8576803903  | -0.453674483  | -5.5795349515 |
| C | 2.7444694387  | 2.7776542866  | -2.7904875433 |
| H | 2.7693363249  | 3.7802492087  | -3.2785204586 |
| H | 3.7381247612  | 2.6510793828  | -2.3083519184 |
| H | 2.6843455563  | 2.0243618343  | -3.6040567166 |
| H | 2.6843455563  | 2.0243618343  | -3.6040567166 |

TS 0038

E(RB-P86) = -5316.45230478 A.U.

First frequency = -187.9422 cm<sup>-1</sup>

|   |               |               |              |
|---|---------------|---------------|--------------|
| C | -2.5661365043 | -1.6837324667 | 0.475592425  |
| C | -3.9698842622 | -0.1655030034 | 1.7252137328 |
| C | -4.584440213  | -1.2320731207 | 2.3962776833 |
| C | -4.1973269861 | -2.5483150646 | 2.1134630282 |
| C | -3.2002950377 | -2.7567054286 | 1.1534506417 |

|   |               |               |               |
|---|---------------|---------------|---------------|
| C | -1.5456547606 | -2.1870302874 | -0.5161122074 |
| C | -1.9756748107 | -2.8004496406 | -1.7097483435 |
| C | -1.0441581801 | -3.5145659524 | -2.4792755861 |
| C | 0.2711512823  | -3.6370087741 | -2.0207067138 |
| C | 0.6500354449  | -2.9929944669 | -0.819067092  |
| H | -4.3146334115 | 0.8463114519  | 1.965024695   |
| H | -5.3689685526 | -1.0253722881 | 3.141598587   |
| H | -4.6618678137 | -3.4033495763 | 2.6288956486  |
| H | -2.8856412247 | -3.7850542947 | 0.9131790419  |
| H | -3.0327483666 | -2.7367113568 | -2.006128391  |
| H | -1.354110019  | -4.0050388819 | -3.415603361  |
| H | 0.999634473   | -4.2520875912 | -2.5671127375 |
| N | -0.2512237053 | -2.2588049237 | -0.1149858248 |
| C | -2.3153896108 | 0.874243174   | 0.0153789861  |
| C | -2.4019004476 | 2.2700824901  | 0.8205280529  |
| C | -3.2125431249 | 1.2448004073  | -1.3202813259 |
| C | -3.7920723435 | 2.8358536128  | 0.4181372564  |
| C | -1.4880367339 | 3.2785240447  | 0.0589278286  |
| C | -3.541180107  | 2.7617513147  | -1.1018585095 |
| H | -3.9287443685 | 3.8785204377  | 0.7790881263  |
| H | -4.6704108597 | 2.2513421088  | 0.7509266132  |
| H | -1.3243921623 | 4.1703634573  | 0.6990057914  |
| H | -0.4965144366 | 2.8347188561  | -0.1361230167 |
| C | -2.280562708  | 3.6443324301  | -1.2279499758 |
| H | -4.3826986203 | 3.0936772788  | -1.745978816  |
| H | -2.5707417372 | 4.7159143451  | -1.234448916  |
| H | -1.7127076424 | 3.4727180341  | -2.1645204865 |
| C | -4.5485681069 | 0.467504983   | -1.4035064992 |
| H | -5.1124515077 | 0.8023687392  | -2.3003666131 |
| H | -4.3844552664 | -0.6245661071 | -1.5002306012 |
| H | -5.2027536352 | 0.6181283429  | -0.5234701219 |
| C | -2.4748145364 | 0.9701315987  | -2.6346223102 |
| H | -2.2350761413 | -0.1054087797 | -2.7490337901 |
| H | -3.1112719103 | 1.2687437781  | -3.4953200477 |
| H | -1.5258253814 | 1.5316498501  | -2.7403531122 |
| C | -2.0208059089 | 2.2404282556  | 2.3019085286  |
| H | -2.0689547049 | 3.2655474669  | 2.7269635734  |
| H | -2.6565965347 | 1.5861811755  | 2.9273156586  |

|    |               |               |               |
|----|---------------|---------------|---------------|
| H  | -0.9777702274 | 1.8816340688  | 2.4190238872  |
| C  | -2.9446656371 | -0.3354258259 | 0.7614299441  |
| O  | -0.9678152325 | 0.5215408758  | -0.2565315935 |
| C  | 2.0136586326  | -3.1715020877 | -0.2497373243 |
| C  | 3.1311642394  | -3.4255403484 | -1.0804724733 |
| C  | 2.2049194758  | -3.1574066504 | 1.1520660472  |
| C  | 4.4020692576  | -3.6440908181 | -0.5273253361 |
| H  | 3.0138966934  | -3.4239323935 | -2.1748421256 |
| C  | 3.4747981475  | -3.3846198238 | 1.7037536296  |
| H  | 1.3405734016  | -2.9828067053 | 1.8098047164  |
| C  | 4.5791091968  | -3.6257189752 | 0.8674433234  |
| H  | 5.2616410248  | -3.8246263888 | -1.1921082596 |
| H  | 3.6008977001  | -3.3786693319 | 2.7978714612  |
| H  | 5.5760992929  | -3.8008860948 | 1.3019693763  |
| Zn | 0.1143104015  | -0.4965737423 | 1.1864614661  |
| C  | 0.0247914344  | -0.8323190571 | 3.1566890916  |
| H  | -0.7756934365 | -0.1930142899 | 3.5899820483  |
| H  | -0.3750719872 | -1.8707228915 | 3.2349278141  |
| Zn | 0.439113199   | 0.7533843066  | -1.7359000654 |
| O  | 1.715259448   | 0.0496110265  | -0.0338165073 |
| C  | 0.6818684055  | -0.1964365363 | -3.4887036864 |
| H  | 0.3444221104  | 0.5048024413  | -4.28667855   |
| H  | -0.0338510714 | -1.0476551651 | -3.5182098643 |
| C  | 2.4663610709  | 1.0780097687  | -0.2886563551 |
| C  | 1.4502597876  | 2.7570229346  | -1.7550745275 |
| H  | 1.5583732931  | 3.4379700265  | -0.8908727228 |
| H  | 0.4467090588  | 2.9914360956  | -2.1912587117 |
| H  | 3.1883910832  | 0.9672707356  | -1.1289145913 |
| C  | 2.8780778068  | 2.0575923196  | 0.7410873966  |
| C  | 4.07235847    | 2.7962139123  | 0.5555799161  |
| C  | 2.1204691151  | 2.2771252303  | 1.9149176691  |
| C  | 4.4917102307  | 3.7328412427  | 1.5122369255  |
| H  | 4.6817121701  | 2.6197547951  | -0.345631086  |
| C  | 2.5387462512  | 3.2136054497  | 2.8700439999  |
| H  | 1.1966640463  | 1.6988734034  | 2.0715766521  |
| C  | 3.7249234279  | 3.9465248501  | 2.6722240095  |
| H  | 5.4261272841  | 4.295129903   | 1.356229393   |
| H  | 1.9362236162  | 3.373287301   | 3.7782518629  |

|   |              |               |               |
|---|--------------|---------------|---------------|
| H | 4.0531298491 | 4.6808977052  | 3.4249608194  |
| C | 1.3021798479 | -0.7052660086 | 4.0016757492  |
| H | 1.6982066299 | 0.3325529402  | 4.0163315508  |
| H | 1.1419711093 | -0.9974643452 | 5.0661251184  |
| H | 2.1296862477 | -1.3408106016 | 3.6181947929  |
| C | 2.1006678246 | -0.6944222932 | -3.7963775263 |
| H | 2.8334810206 | 0.1388584621  | -3.8619073708 |
| H | 2.4804584336 | -1.3775882717 | -3.0070199878 |
| H | 2.1693555396 | -1.2472681755 | -4.7639754819 |
| C | 2.5180408716 | 2.9762170167  | -2.8175371453 |
| H | 2.5689323879 | 4.039031012   | -3.1517863217 |
| H | 3.5396475875 | 2.7225877238  | -2.4560126858 |
| H | 2.3345166647 | 2.361445033   | -3.7231154836 |
| H | 2.3345166647 | 2.361445033   | -3.7231154836 |

TS 0040

E(RB-P86) = -5316.44916851 A.U.

First frequency = -182.0765 cm<sup>-1</sup>

|   |               |               |               |
|---|---------------|---------------|---------------|
| C | -2.5815094557 | -1.7747005607 | 0.563059372   |
| C | -3.9870584702 | -0.1900366256 | 1.7264019079  |
| C | -4.6181895644 | -1.2215070231 | 2.4368122298  |
| C | -4.2449996843 | -2.5526983165 | 2.2114181236  |
| C | -3.2357574227 | -2.8113642087 | 1.2765308797  |
| C | -1.5400008489 | -2.3170489777 | -0.3826315087 |
| C | -1.9395563733 | -3.0215448284 | -1.5358768791 |
| C | -0.9725470409 | -3.7184621516 | -2.2767039788 |
| C | 0.3532754804  | -3.7256361201 | -1.8328446387 |
| C | 0.6980663787  | -3.0013389467 | -0.6677018019 |
| H | -4.3259926261 | 0.8339431723  | 1.9177378374  |
| H | -5.4069408705 | -0.9752884922 | 3.1654688903  |
| H | -4.7256251505 | -3.3803658843 | 2.7558027918  |
| H | -2.924648382  | -3.8514874662 | 1.0882697921  |
| H | -2.9996228625 | -3.0316273639 | -1.8281564606 |
| H | -1.2593743597 | -4.2761366893 | -3.1822833607 |
| H | 1.1209667582  | -4.3088177985 | -2.3605883705 |
| N | -0.2430116089 | -2.3007757555 | 0.0170176386  |
| C | -2.3432183848 | 0.756262942   | -0.0458319919 |

|   |               |               |               |
|---|---------------|---------------|---------------|
| C | -2.4680771452 | 2.2044457066  | 0.6443836781  |
| C | -3.2349527554 | 0.9992914806  | -1.4156535785 |
| C | -3.8731353854 | 2.6976310543  | 0.1998253813  |
| C | -1.5823440258 | 3.1736335838  | -0.1977562917 |
| C | -3.6154497678 | 2.5166634804  | -1.3111436795 |
| H | -4.0421889004 | 3.7601711998  | 0.4800109428  |
| H | -4.7349355139 | 2.1136809372  | 0.5743286318  |
| H | -1.4355050302 | 4.1134320984  | 0.3741169624  |
| H | -0.5810513899 | 2.7375462218  | -0.36506253   |
| C | -2.3842071588 | 3.426411316   | -1.5050361655 |
| H | -4.4663808787 | 2.7703881703  | -1.9779849098 |
| H | -2.7071460292 | 4.4855578425  | -1.5845696205 |
| H | -1.8114087619 | 3.2053393326  | -2.4275303872 |
| C | -4.5458169325 | 0.1778816122  | -1.4614373214 |
| H | -5.1041151929 | 0.4314649307  | -2.387935115  |
| H | -4.3502267672 | -0.9129899884 | -1.4775806703 |
| H | -5.2176789609 | 0.3728461598  | -0.6035816408 |
| C | -2.4645979594 | 0.6548205141  | -2.6945674652 |
| H | -3.0872779508 | 0.8854263481  | -3.585650163  |
| H | -1.5206158434 | 1.2225658472  | -2.8132473577 |
| H | -2.2008283022 | -0.4205218511 | -2.7320062527 |
| C | -2.0733466713 | 2.2983812979  | 2.1200027403  |
| H | -2.1799310935 | 3.3447822881  | 2.477262928   |
| H | -2.6595783272 | 1.6490429426  | 2.7969925641  |
| H | -1.0081333475 | 2.0137030849  | 2.2449374374  |
| C | -2.9581327617 | -0.4108380069 | 0.7770491292  |
| O | -0.9855327766 | 0.4172269136  | -0.2767825743 |
| C | 2.0837507232  | -3.0368385729 | -0.1286388506 |
| C | 3.1992151839  | -3.1153842353 | -0.9951049982 |
| C | 2.3065506528  | -3.0347516463 | 1.2679016584  |
| C | 4.5020193506  | -3.1827828267 | -0.4779707639 |
| H | 3.0471456937  | -3.0871043188 | -2.0854097566 |
| C | 3.609507755   | -3.1084425234 | 1.7828251441  |
| H | 1.4451990335  | -2.9881366347 | 1.9511186125  |
| C | 4.7118359439  | -3.1816886885 | 0.9128295059  |
| H | 5.360717334   | -3.2284592527 | -1.1665465438 |
| H | 3.7643254524  | -3.1116712196 | 2.8732719618  |
| H | 5.7346656014  | -3.2365516145 | 1.3182349277  |

|    |               |               |               |
|----|---------------|---------------|---------------|
| Zn | 0.0772044666  | -0.4995040341 | 1.2338316951  |
| C  | 0.2013263082  | -0.5870395669 | 3.2240922003  |
| H  | 1.2811645032  | -0.7134202169 | 3.4693742352  |
| H  | -0.0845932001 | 0.3938351204  | 3.6661022935  |
| Zn | 0.4685471336  | 0.6863978621  | -1.7020951815 |
| O  | 1.6932786313  | -0.0134021653 | 0.0019441697  |
| C  | 0.8639056784  | -0.3459683181 | -3.3833025374 |
| H  | 0.173439055   | -1.2170270755 | -3.4340523871 |
| H  | 1.8826112992  | -0.7770958301 | -3.2439252523 |
| C  | 2.5570177922  | 0.9104651876  | -0.2730142455 |
| C  | 1.6073271489  | 2.6469337349  | -1.8819099016 |
| H  | 0.7209711542  | 2.7538892504  | -2.5600081153 |
| H  | 2.4566338703  | 2.4118423552  | -2.5566809061 |
| H  | 3.218522217   | 0.7305344231  | -1.1495767259 |
| C  | 3.1198522979  | 1.8173700843  | 0.7402453139  |
| C  | 4.3809573688  | 2.4177608477  | 0.4998029081  |
| C  | 2.4635376766  | 2.0780296463  | 1.9669580234  |
| C  | 4.9713621253  | 3.2527688621  | 1.4591415062  |
| H  | 4.9013959002  | 2.2126715485  | -0.4505256492 |
| C  | 3.0518856518  | 2.9180763971  | 2.9221435932  |
| H  | 1.490869538   | 1.6037736332  | 2.1667828018  |
| C  | 4.3065907069  | 3.5077169624  | 2.6734207862  |
| H  | 5.9555671592  | 3.7067931994  | 1.2621248903  |
| H  | 2.5302776102  | 3.1127928973  | 3.8726393569  |
| H  | 4.7676843248  | 4.1645623762  | 3.4281874943  |
| C  | -0.6228693137 | -1.7024388797 | 3.8877365656  |
| H  | -0.4724916285 | -1.7522949919 | 4.9919060899  |
| H  | -1.7125398616 | -1.5703081435 | 3.7172569124  |
| H  | -0.3688112512 | -2.7108770117 | 3.4902575266  |
| C  | 0.8096818931  | 0.4473247682  | -4.6960923966 |
| H  | -0.2014869744 | 0.8695397963  | -4.8898713062 |
| H  | 1.5140240328  | 1.3078567954  | -4.6964992998 |
| H  | 1.0658262748  | -0.1698444234 | -5.5902556275 |
| C  | 1.8036694866  | 3.9653517554  | -1.1458506354 |
| H  | 2.7807115111  | 4.0216203499  | -0.625586721  |
| H  | 1.7710213298  | 4.8364193664  | -1.8433082357 |
| H  | 1.0227088457  | 4.1479513655  | -0.3786049302 |
| H  | 1.0227088457  | 4.1479513655  | -0.3786049302 |



TS 0063

E(RB-P86) = -5316.44695238 A.U.

First frequency = -189.4163  $\text{cm}^{-1}$

|   |               |               |               |
|---|---------------|---------------|---------------|
| C | -2.5745364722 | -1.7139921393 | 0.6950601426  |
| C | -3.8594416694 | -0.0173446855 | 1.8410839354  |
| C | -4.3833872265 | -0.9708900996 | 2.7277810805  |
| C | -4.0167110663 | -2.3161366338 | 2.6028099778  |
| C | -3.1218924416 | -2.6704460687 | 1.5848730236  |
| C | -1.6264755874 | -2.3405267137 | -0.298649505  |
| C | -2.1112903512 | -3.1378802369 | -1.3541578849 |
| C | -1.1953784292 | -3.8478713111 | -2.1461225788 |
| C | 0.1668591579  | -3.7863402562 | -1.8365777108 |
| C | 0.5934300236  | -2.9972073232 | -0.7423543302 |
| H | -4.1942161915 | 1.0182767622  | 1.9617394142  |
| H | -5.0846783108 | -0.6514656855 | 3.5150749737  |
| H | -4.4165420613 | -3.082512829  | 3.2849234448  |
| H | -2.8192663999 | -3.7238666595 | 1.4704501658  |
| H | -3.1927825835 | -3.2023022825 | -1.5405310177 |
| H | -1.5486413557 | -4.4703328759 | -2.9834777529 |
| H | 0.9005961519  | -4.3782048317 | -2.4022136502 |
| N | -0.3010975836 | -2.2755446101 | -0.0200793071 |
| C | -2.4357504349 | 0.7341415023  | -0.2053601754 |
| C | -2.6704728612 | 2.262366838   | 0.2163281606  |
| C | -3.389141941  | 0.658918839   | -1.5637406846 |
| C | -4.1549646861 | 2.5070166835  | -0.1716640283 |
| C | -1.9793065027 | 3.1555929959  | -0.8684334118 |
| C | -3.9805578214 | 2.1104669199  | -1.6544441939 |
| H | -4.44840193   | 3.5720907446  | -0.0471977317 |
| H | -4.898588181  | 1.8883187452  | 0.3648923782  |
| H | -1.8632710299 | 4.183821178   | -0.4686503977 |
| H | -0.9562300652 | 2.7956539795  | -1.0816692004 |
| C | -2.9155827225 | 3.1243834574  | -2.1038529629 |
| H | -4.9054948833 | 2.1337947847  | -2.2680951061 |
| H | -3.3847512673 | 4.1147712089  | -2.28218406   |
| H | -2.4013040559 | 2.8419975743  | -3.0433028257 |
| C | -4.5941269415 | -0.3048564401 | -1.4450719342 |
| H | -5.193810487  | -0.2496646427 | -2.3789484316 |

|    |               |               |               |
|----|---------------|---------------|---------------|
| H  | -4.2841418735 | -1.3586618149 | -1.3136857567 |
| H  | -5.2675286151 | -0.0583442882 | -0.6007744687 |
| C  | -2.594099436  | 0.2489987318  | -2.8073452462 |
| H  | -2.244453354  | -0.7993913489 | -2.7313167042 |
| H  | -3.2325955149 | 0.3301798562  | -3.7138059032 |
| H  | -1.6949989195 | 0.8694264327  | -2.9743178931 |
| C  | -2.1609152553 | 2.6643100536  | 1.602496714   |
| H  | -2.6381077702 | 2.1301385586  | 2.4444194     |
| H  | -1.0701532717 | 2.467472473   | 1.6708121836  |
| H  | -2.3102354525 | 3.7523503951  | 1.7681122443  |
| C  | -2.9436618496 | -0.3323726517 | 0.8083653313  |
| O  | -1.0523486377 | 0.4610834565  | -0.3973066182 |
| C  | 2.0168135308  | -3.0000277477 | -0.3107007416 |
| C  | 3.0649388838  | -3.0944770789 | -1.2556012128 |
| C  | 2.3425880467  | -2.9584560705 | 1.0648370413  |
| C  | 4.4036330573  | -3.1348890737 | -0.8356694681 |
| H  | 2.8323910182  | -3.1008694896 | -2.3320081719 |
| C  | 3.6808418653  | -3.0067710548 | 1.482686826   |
| H  | 1.5335046972  | -2.9023099432 | 1.8087751736  |
| C  | 4.7162620765  | -3.0928475012 | 0.5349059946  |
| H  | 5.2090359474  | -3.1918674126 | -1.5850469489 |
| H  | 3.9169727144  | -2.9789251445 | 2.5581162561  |
| H  | 5.7669567779  | -3.1262879788 | 0.8640829578  |
| Zn | 0.0066501505  | -0.4282142807 | 1.1354277147  |
| C  | 0.0734044358  | -0.6497776846 | 3.1233882205  |
| H  | -0.5220122136 | -1.5726664303 | 3.3128960445  |
| H  | 1.1233477998  | -0.9283358292 | 3.3766964361  |
| Zn | 0.4558675408  | 1.0538907386  | -1.6799399752 |
| O  | 1.6471291903  | -0.0320209146 | -0.0938464291 |
| C  | 0.8007062289  | 0.3755818726  | -3.5488276058 |
| H  | 0.2354169456  | 1.021236183   | -4.2597852287 |
| H  | 0.3442309668  | -0.635880822  | -3.6409254823 |
| C  | 2.5724218794  | 0.8420034033  | -0.3036894161 |
| C  | 1.6097378093  | 2.9708290189  | -1.2684426597 |
| H  | 0.9479436074  | 3.278239647   | -2.1167565915 |
| H  | 2.6338613394  | 3.0129929119  | -1.6916097619 |
| H  | 3.104334362   | 0.7853023155  | -1.2794665236 |
| C  | 3.3337303799  | 1.5092920333  | 0.7639260078  |

|   |               |               |               |
|---|---------------|---------------|---------------|
| C | 4.5388772251  | 2.1794093295  | 0.4373961676  |
| C | 2.9130111213  | 1.4728155728  | 2.1151585901  |
| C | 5.3006905284  | 2.8030338533  | 1.4349322908  |
| H | 4.8757004065  | 2.2030563677  | -0.6122235888 |
| C | 3.6792674874  | 2.0937699336  | 3.1115319245  |
| H | 1.9833214757  | 0.9423020887  | 2.3696959356  |
| C | 4.8723466903  | 2.7623271481  | 2.7759617207  |
| H | 6.2362207974  | 3.3207670086  | 1.1697989572  |
| H | 3.343798571   | 2.0570902711  | 4.1601363976  |
| H | 5.4711655788  | 3.2510444165  | 3.5611084042  |
| C | -0.4037343744 | 0.4621263031  | 4.0693375547  |
| H | -1.4752473118 | 0.705959586   | 3.9104810356  |
| H | -0.2972977461 | 0.1850530207  | 5.1444521712  |
| H | 0.1591658805  | 1.4116111129  | 3.9300921964  |
| C | 2.2778725687  | 0.3281187336  | -3.9690802055 |
| H | 2.767555874   | 1.3243406892  | -3.898074395  |
| H | 2.8708649591  | -0.3654672664 | -3.3322672285 |
| H | 2.4205472681  | -0.0158509506 | -5.0215758493 |
| C | 1.4332054261  | 3.93198253    | -0.1008202835 |
| H | 2.1445229531  | 3.7306959699  | 0.7266006092  |
| H | 1.5996519209  | 4.9942793278  | -0.4013870006 |
| H | 0.4143604197  | 3.8872882996  | 0.3358900358  |
| H | 0.4143604197  | 3.8872882996  | 0.3358900358  |

TS 0073

$E(\text{RB-P86}) = -5316.44854150 \text{ A.U.}$

First frequency =  $-189.6278 \text{ cm}^{-1}$

|   |               |               |               |
|---|---------------|---------------|---------------|
| C | -2.5883293063 | -1.5602433887 | 0.7689113218  |
| C | -3.8848393953 | 0.1795501599  | 1.829448148   |
| C | -4.4049830332 | -0.7339018998 | 2.7592815943  |
| C | -4.0267918398 | -2.0808327997 | 2.7024303448  |
| C | -3.1283122597 | -2.4773899815 | 1.7038364802  |
| C | -1.6392043537 | -2.2263377797 | -0.1956330832 |
| C | -2.1271197089 | -3.0449214226 | -1.2326670515 |
| C | -1.2164664715 | -3.7974584783 | -1.9900787664 |
| C | 0.1428035912  | -3.7495559925 | -1.6665247659 |
| C | 0.5747572189  | -2.929610217  | -0.5971610384 |

|   |               |               |               |
|---|---------------|---------------|---------------|
| H | -4.2221366914 | 1.2185942766  | 1.9046279654  |
| H | -5.1102377527 | -0.3814898176 | 3.5287961037  |
| H | -4.4212819533 | -2.8156240551 | 3.4213989689  |
| H | -2.8183151863 | -3.5329473897 | 1.6397274023  |
| H | -3.2077211182 | -3.0936400591 | -1.4286048767 |
| H | -1.5714449728 | -4.4409940822 | -2.8105889514 |
| H | 0.8711583882  | -4.3731055197 | -2.2040834904 |
| N | -0.3151151332 | -2.1730524927 | 0.0963494641  |
| C | -2.4384297145 | 0.8475945669  | -0.2316322826 |
| C | -2.6383132451 | 2.3881600435  | 0.1628170732  |
| C | -3.4011055901 | 0.7631254613  | -1.580757272  |
| C | -4.1173489329 | 2.6608129894  | -0.2305877791 |
| C | -1.9287503801 | 3.2445947046  | -0.9379643913 |
| C | -3.9546125487 | 2.2268804489  | -1.7041506738 |
| H | -4.3825311058 | 3.7358098448  | -0.1298945312 |
| H | -4.8783426952 | 2.0750136347  | 0.3178721062  |
| H | -1.7935339647 | 4.27895816    | -0.5602756401 |
| H | -0.9132339846 | 2.8585884995  | -1.1403271969 |
| C | -2.8636833751 | 3.2041463639  | -2.1747723347 |
| H | -4.8791130904 | 2.2612874443  | -2.3180977536 |
| H | -3.309124698  | 4.2004524889  | -2.3790395324 |
| H | -2.3542029464 | 2.8869023683  | -3.1057552507 |
| C | -4.6250652421 | -0.1714000683 | -1.4305655909 |
| H | -5.2911001786 | 0.1128192154  | -0.5923205928 |
| H | -5.2264970563 | -0.1338475898 | -2.3641928207 |
| H | -4.3333036239 | -1.2264422743 | -1.2668735921 |
| C | -2.6237305903 | 0.301539257   | -2.8175922279 |
| H | -1.7110443145 | 0.8953766563  | -3.0062975033 |
| H | -2.2985577932 | -0.7527220851 | -2.7154200289 |
| H | -3.2657955492 | 0.3739806171  | -3.7222459632 |
| C | -2.1194200031 | 2.8004597914  | 1.543639975   |
| H | -1.0271733451 | 2.6102745505  | 1.6033274081  |
| H | -2.2745688026 | 3.888476278   | 1.7047944065  |
| H | -2.585012411  | 2.2647264825  | 2.3916352929  |
| C | -2.9627924459 | -0.1781416687 | 0.81603285    |
| O | -1.0656991153 | 0.5375861834  | -0.4339593137 |
| C | 1.9987305437  | -2.9346866198 | -0.167842806  |
| C | 2.3330911426  | -2.8236697791 | 1.2013476298  |

|    |               |               |               |
|----|---------------|---------------|---------------|
| C  | 3.0410152277  | -3.0985333989 | -1.1102043165 |
| C  | 3.6721845789  | -2.8751612369 | 1.6160336497  |
| H  | 1.531333736   | -2.7097747275 | 1.9461178585  |
| C  | 4.3807920017  | -3.1413448535 | -0.6942985903 |
| H  | 2.8044304126  | -3.1573272854 | -2.1840809714 |
| C  | 4.7013786673  | -3.0324421921 | 0.670711584   |
| H  | 3.9131600256  | -2.793748652  | 2.68763569    |
| H  | 5.1809796299  | -3.2530696488 | -1.4430998561 |
| H  | 5.7528439742  | -3.0682917449 | 0.997074129   |
| Zn | 0.0025342568  | -0.2781134655 | 1.1481483834  |
| C  | -0.1475874173 | -0.0331193956 | 3.1284849243  |
| H  | 0.1531319985  | 1.0055126762  | 3.3968283323  |
| H  | -1.2388311323 | -0.0760968412 | 3.3432223161  |
| Zn | 0.4480123405  | 1.0615882847  | -1.7346449427 |
| O  | 1.6369710482  | -0.0029802859 | -0.1065814899 |
| C  | 0.7741729433  | 0.3100111721  | -3.5792004771 |
| H  | 0.2104962047  | 0.9363119292  | -4.3085269954 |
| H  | 0.3028906704  | -0.6976261762 | -3.6297736654 |
| C  | 2.5829672187  | 0.8318275468  | -0.3721545566 |
| C  | 1.6445283556  | 2.95942408    | -1.3749422427 |
| H  | 0.9750110274  | 3.2699943234  | -2.2163033773 |
| H  | 2.6613762775  | 2.9707581245  | -1.8173744812 |
| H  | 3.0779126117  | 0.731040175   | -1.3633169857 |
| C  | 3.4015132731  | 1.5024019765  | 0.6497119057  |
| C  | 4.6102950223  | 2.1322738394  | 0.2620151981  |
| C  | 3.0327067474  | 1.5060672176  | 2.0166554087  |
| C  | 5.4264968365  | 2.7561307122  | 1.2152819987  |
| H  | 4.9063896708  | 2.1241672017  | -0.8000176693 |
| C  | 3.8532117015  | 2.1277085502  | 2.9684637984  |
| H  | 2.0953703199  | 1.0145529939  | 2.3173463459  |
| C  | 5.0496061932  | 2.7559415607  | 2.5723231011  |
| H  | 6.3643017909  | 3.2424735041  | 0.9029806319  |
| H  | 3.5577113418  | 2.1240264071  | 4.0296818835  |
| H  | 5.6911245209  | 3.245194032   | 3.3226439047  |
| C  | 0.5887006815  | -1.0367648616 | 4.0305903801  |
| H  | 1.6911035388  | -1.0137178383 | 3.8808135418  |
| H  | 0.4150667183  | -0.8514485322 | 5.1167223276  |
| H  | 0.2619819496  | -2.0830666703 | 3.8388798567  |

|   |              |               |               |
|---|--------------|---------------|---------------|
| C | 2.2458675118 | 0.226639483   | -4.0127746858 |
| H | 2.8356118968 | -0.4556305532 | -3.360802661  |
| H | 2.3721364869 | -0.1527290721 | -5.0551281506 |
| H | 2.7511944456 | 1.2169967724  | -3.9783879885 |
| C | 1.5119133127 | 3.9432016317  | -0.2201850763 |
| H | 0.4994535601 | 3.9316376039  | 0.233344833   |
| H | 2.2311279652 | 3.7357945647  | 0.5989571233  |
| H | 1.7006311576 | 4.9961988735  | -0.5396790538 |
| H | 1.7006311576 | 4.9961988735  | -0.5396790538 |

TS 0077

E(RB-P86) = -5316.44660371 A.U.

First frequency = -197.7803 cm<sup>-1</sup>

|   |               |               |               |
|---|---------------|---------------|---------------|
| C | -2.5385639603 | -1.6723138995 | 0.5992745451  |
| C | -3.8269833102 | -0.0507044712 | 1.8450798067  |
| C | -4.3965905433 | -1.0626441317 | 2.6326293221  |
| C | -4.049621395  | -2.4004213652 | 2.4076351129  |
| C | -3.1293849478 | -2.6877258665 | 1.3917910306  |
| C | -1.5752605485 | -2.2411992325 | -0.4145495429 |
| C | -2.0537056889 | -2.9261500687 | -1.5488032154 |
| C | -1.1433714346 | -3.6401291225 | -2.3439817312 |
| C | 0.2017094853  | -3.6907073538 | -1.9656146471 |
| C | 0.6243807517  | -2.9927633631 | -0.8089509456 |
| H | -4.1415130053 | 0.9790436157  | 2.0452053405  |
| H | -5.1157789523 | -0.7948219866 | 3.4230038041  |
| H | -4.4836074804 | -3.2120555863 | 3.0121177119  |
| H | -2.8414027533 | -3.7340048467 | 1.200375201   |
| H | -3.127277695  | -2.9105924991 | -1.7859242487 |
| H | -1.4905062845 | -4.1821988053 | -3.2378951911 |
| H | 0.9222499685  | -4.2955742925 | -2.5339931981 |
| N | -0.2608849004 | -2.2647850073 | -0.0803549287 |
| C | -2.3190656832 | 0.8377328423  | -0.0819005555 |
| C | -2.4618429021 | 2.3180492287  | 0.5183762385  |
| C | -3.2585291343 | 0.9795082474  | -1.438118723  |
| C | -3.9191934623 | 2.707954956   | 0.1460476426  |
| C | -1.6837598609 | 3.275515008   | -0.4432488732 |
| C | -3.7453385373 | 2.470792926   | -1.3692410706 |

|    |               |               |               |
|----|---------------|---------------|---------------|
| H  | -4.1389218066 | 3.7704917937  | 0.3882014396  |
| H  | -4.7156319742 | 2.0892090199  | 0.6001542193  |
| H  | -1.5017355737 | 4.2405366686  | 0.0737861019  |
| H  | -0.6903512558 | 2.8572136056  | -0.681393802  |
| C  | -2.6028778377 | 3.4535750052  | -1.6821852384 |
| H  | -4.653410378  | 2.6307349826  | -1.9877783286 |
| H  | -3.0021050023 | 4.487641063   | -1.7465790261 |
| H  | -2.0972183573 | 3.2515210628  | -2.6469411433 |
| C  | -4.5186061042 | 0.0818593646  | -1.4267069198 |
| H  | -5.1821035407 | 0.2730340386  | -0.5607864401 |
| H  | -5.1087387979 | 0.2699953724  | -2.349161491  |
| H  | -4.2656549493 | -0.9960425687 | -1.4081572551 |
| C  | -2.4875471877 | 0.6541983289  | -2.7217360649 |
| H  | -3.1265887507 | 0.8487640542  | -3.6101624916 |
| H  | -1.5659645391 | 1.2535845718  | -2.8483894572 |
| H  | -2.1823606335 | -0.410541657  | -2.749595912  |
| C  | -1.9630004117 | 2.5216291497  | 1.9498163776  |
| H  | -2.0802903576 | 3.5847208128  | 2.2495116749  |
| H  | -2.4698252656 | 1.899657295   | 2.7099292741  |
| H  | -0.879956607  | 2.283902824   | 2.0066159315  |
| C  | -2.8864294136 | -0.2997992899 | 0.815664947   |
| O  | -0.9549715614 | 0.5077991502  | -0.3082592022 |
| C  | 2.0255915487  | -3.0999902343 | -0.3205216162 |
| C  | 2.2992183719  | -3.0836959245 | 1.0671133629  |
| C  | 3.1025030453  | -3.2766794431 | -1.2211524569 |
| C  | 3.6117672903  | -3.2333633478 | 1.5387635491  |
| H  | 1.4687536978  | -2.9681509839 | 1.7791547128  |
| C  | 4.415921425   | -3.4196057231 | -0.7477125034 |
| H  | 2.9167016599  | -3.2706122889 | -2.3062412893 |
| C  | 4.6755892592  | -3.3993969418 | 0.6342428224  |
| H  | 3.8041127147  | -3.223044268  | 2.6232130237  |
| H  | 5.2436137029  | -3.5404002876 | -1.4645092813 |
| H  | 5.7064120875  | -3.5135221413 | 1.0056312631  |
| Zn | 0.0917492222  | -0.4746757368 | 1.1828159286  |
| C  | 0.2107406794  | -0.8433271737 | 3.1445465755  |
| H  | -0.1806405893 | -1.8826049512 | 3.2468357557  |
| H  | 1.2990955708  | -0.9130321878 | 3.3755336331  |
| Zn | 0.5361777609  | 0.8039536414  | -1.6806518044 |

|   |               |               |               |
|---|---------------|---------------|---------------|
| O | 1.7150546899  | -0.0075714111 | -0.0312131505 |
| C | 0.8537896414  | -0.0630072971 | -3.4620203937 |
| H | 0.3446778992  | 0.5370472611  | -4.2490195545 |
| H | 0.3302757001  | -1.0454130832 | -3.445692205  |
| C | 2.5699618757  | 0.9572783052  | -0.2345017811 |
| C | 1.754101322   | 2.8041386339  | -1.4574136486 |
| H | 2.8429369509  | 2.9907036921  | -1.4266158379 |
| H | 1.313709835   | 3.3550181003  | -0.6005431318 |
| H | 3.3049504633  | 0.7873204777  | -1.0525373335 |
| C | 3.0769959175  | 1.8197672241  | 0.8595983221  |
| C | 4.3148199277  | 2.4885629793  | 0.6956982706  |
| C | 2.3766273359  | 1.9830576354  | 2.0770957717  |
| C | 4.8352458317  | 3.2989011056  | 1.7151900919  |
| H | 4.879177593   | 2.355969928   | -0.2426420691 |
| C | 2.8966691881  | 2.7932879583  | 3.0970648406  |
| H | 1.4242365936  | 1.4511231906  | 2.2270369867  |
| C | 4.1256847337  | 3.4561005218  | 2.9201916547  |
| H | 5.8021408843  | 3.8073450164  | 1.5725903863  |
| H | 2.3393562302  | 2.9061096118  | 4.0405221461  |
| H | 4.5323623863  | 4.0916588974  | 3.7229565611  |
| C | -0.477404793  | 0.0511937441  | 4.184812694   |
| H | -1.5758274808 | 0.1003118857  | 4.0272644278  |
| H | -0.3201482125 | -0.3098693791 | 5.2282571071  |
| H | -0.1062689317 | 1.0993431322  | 4.1569501214  |
| C | 2.3337480875  | -0.2570331019 | -3.819368352  |
| H | 2.8811129193  | 0.7097054336  | -3.8787044813 |
| H | 2.8658988156  | -0.8736235436 | -3.0624660395 |
| H | 2.4824154734  | -0.7607473802 | -4.804473337  |
| C | 1.2283895009  | 3.3185024899  | -2.8101331176 |
| H | 0.1229445531  | 3.2680419427  | -2.9097386238 |
| H | 1.5065292471  | 4.3907277961  | -2.9551484531 |
| H | 1.6548206968  | 2.7590815474  | -3.6685413278 |
| H | 1.6548206968  | 2.7590815474  | -3.6685413278 |

TS 0080

$E(\text{RB-P86}) = -5316.45222365 \text{ A.U.}$

First frequency =  $-192.0249 \text{ cm}^{-1}$



|   |               |               |               |
|---|---------------|---------------|---------------|
| C | -2.5694754904 | -1.8075218271 | 0.4056978012  |
| C | -4.0141546768 | -0.3305089693 | 1.6584418627  |
| C | -4.617608381  | -1.4159460445 | 2.3090579841  |
| C | -4.2047764606 | -2.7214777305 | 2.0133330665  |
| C | -3.1929297105 | -2.8996527357 | 1.0628766202  |
| C | -1.5217037441 | -2.2832543941 | -0.571521112  |
| C | -1.9215167693 | -2.9034905797 | -1.7721668513 |
| C | -0.9644905778 | -3.5979511287 | -2.5279379571 |
| C | 0.3472613343  | -3.6894861913 | -2.052654065  |
| C | 0.6979379237  | -3.0338501204 | -0.8484514503 |
| H | -4.3763649758 | 0.6722920996  | 1.9101200442  |
| H | -5.4129594715 | -1.2323037441 | 3.0489417409  |
| H | -4.6597568144 | -3.5912133987 | 2.512431329   |
| H | -2.855913013  | -3.919117261  | 0.8153059728  |
| H | -2.9753157358 | -2.8610186769 | -2.0837059253 |
| H | -1.2507850675 | -4.0958735994 | -3.4678621292 |
| H | 1.095815711   | -4.2871655082 | -2.59094508   |
| N | -0.2310401094 | -2.325446831  | -0.1532187535 |
| C | -2.3610605645 | 0.7631969906  | -0.0166358542 |
| C | -2.4599318475 | 2.1384852533  | 0.8212840022  |
| C | -3.2591370662 | 1.1548242245  | -1.343602634  |
| C | -3.8544012944 | 2.7022740083  | 0.4304632138  |
| C | -1.5548549125 | 3.1732284345  | 0.0848303519  |
| C | -3.6014956226 | 2.6636007644  | -1.0909860532 |
| H | -3.9992514227 | 3.7358707365  | 0.8135913165  |
| H | -4.7292945447 | 2.1048908651  | 0.7490961234  |
| H | -1.4031376264 | 4.0520512347  | 0.7455175663  |
| H | -0.5580509223 | 2.7445831635  | -0.117033744  |
| C | -2.3483081249 | 3.5596495712  | -1.1957463547 |
| H | -4.4453577046 | 3.002787533   | -1.7282332145 |
| H | -2.6475085422 | 4.6286415926  | -1.1801961947 |
| H | -1.7774404012 | 3.4127202921  | -2.1347438397 |
| C | -4.5867113253 | 0.3661390204  | -1.4475508153 |
| H | -5.1506510866 | 0.7129340785  | -2.3398086065 |
| H | -4.410398835  | -0.7221017534 | -1.5649197549 |
| H | -5.2456772653 | 0.492792094   | -0.5673542006 |
| C | -2.5154675457 | 0.9152965266  | -2.6618859997 |
| H | -1.5722743652 | 1.4890177798  | -2.7539450913 |

|    |               |               |               |
|----|---------------|---------------|---------------|
| H  | -2.2638846867 | -0.1552004745 | -2.7978214656 |
| H  | -3.1530170884 | 1.2246163726  | -3.5179349705 |
| C  | -2.0739374987 | 2.0713138079  | 2.3000747452  |
| H  | -1.0292459346 | 1.710326414   | 2.4026864343  |
| H  | -2.1203959253 | 3.0847024455  | 2.7524473739  |
| H  | -2.7063821685 | 1.3998699929  | 2.9104790812  |
| C  | -2.9766740492 | -0.4699447954 | 0.7029359781  |
| O  | -1.0102719774 | 0.4329038788  | -0.2955430295 |
| C  | 2.0659315892  | -3.1633492714 | -0.2745730536 |
| C  | 2.2631316002  | -3.0947889203 | 1.1248391203  |
| C  | 3.1887594667  | -3.4124843705 | -1.0999908914 |
| C  | 3.5408876442  | -3.2617699714 | 1.6790085931  |
| H  | 1.3986947322  | -2.9187319136 | 1.7813510135  |
| C  | 4.4673196784  | -3.574760676  | -0.5449333087 |
| H  | 3.0703339981  | -3.4512392813 | -2.193499507  |
| C  | 4.6491408527  | -3.50085955   | 0.8473793277  |
| H  | 3.6700298424  | -3.2087995893 | 2.7715499     |
| H  | 5.3293547505  | -3.7535798675 | -1.2069868856 |
| H  | 5.6527204408  | -3.6297168118 | 1.2829939727  |
| Zn | 0.0733907624  | -0.5580582205 | 1.1577663444  |
| C  | -0.1403243939 | -0.9563008413 | 3.1095479746  |
| H  | -1.2276218163 | -0.8357013891 | 3.3169619727  |
| H  | 0.0355133766  | -2.0543306464 | 3.195738138   |
| Zn | 0.3952096672  | 0.6983334849  | -1.7635262852 |
| O  | 1.674671178   | -0.0046490785 | -0.0546424944 |
| C  | 0.6583401197  | -0.2321807953 | -3.5233150873 |
| H  | 0.3110743983  | 0.4682864469  | -4.3177150951 |
| H  | -0.0433029066 | -1.0948874582 | -3.5601804907 |
| C  | 2.4307538882  | 1.0172896292  | -0.3195743438 |
| C  | 1.3848728405  | 2.712807847   | -1.7427838435 |
| H  | 1.5184471797  | 3.376811176   | -0.8689486693 |
| H  | 0.3659971584  | 2.9525797224  | -2.1384398014 |
| H  | 3.123090042   | 0.9108917236  | -1.1846785348 |
| C  | 2.8902180487  | 1.9709708089  | 0.713763774   |
| C  | 4.0486624912  | 2.750723026   | 0.4745412586  |
| C  | 2.2193861792  | 2.1142894086  | 1.9501224207  |
| C  | 4.5127381046  | 3.6583836952  | 1.4377283218  |
| H  | 4.5936588676  | 2.6307517724  | -0.4757239043 |

|   |              |               |               |
|---|--------------|---------------|---------------|
| C | 2.6853334738 | 3.0191208216  | 2.9139235666  |
| H | 1.3326512386 | 1.495533788   | 2.155569725   |
| C | 3.8306923553 | 3.7978125486  | 2.6606978196  |
| H | 5.4169699771 | 4.2552209518  | 1.2381886832  |
| H | 2.1533547439 | 3.1149875204  | 3.8736653879  |
| H | 4.1955983853 | 4.5079395324  | 3.4198115944  |
| C | 0.6726547362 | -0.228109009  | 4.1892610598  |
| H | 0.4442471155 | 0.8602108332  | 4.2214884117  |
| H | 0.4656122945 | -0.6166183945 | 5.2138833898  |
| H | 1.7688741451 | -0.3167412414 | 4.0289500324  |
| C | 2.0858323518 | -0.7050467102 | -3.8307008247 |
| H | 2.8060292941 | 0.1400597228  | -3.8837900444 |
| H | 2.472332021  | -1.391944363  | -3.0477826503 |
| H | 2.1668292765 | -1.2457185602 | -4.8041919449 |
| C | 2.4155876704 | 2.9563096961  | -2.8365118816 |
| H | 2.4683982714 | 4.0292322341  | -3.1364785976 |
| H | 3.4467746136 | 2.6771698883  | -2.5241634119 |
| H | 2.1902172333 | 2.3746685564  | -3.7544052118 |
| H | 2.1902172333 | 2.3746685564  | -3.7544052118 |

TS 0098

E(RB-P86) = -5316.45367166 A.U.

First frequency = -197.4149  $\text{cm}^{-1}$

|   |               |               |               |
|---|---------------|---------------|---------------|
| C | -2.5615583774 | -1.6783232108 | 0.5768176732  |
| C | -3.9309158249 | -0.1032448159 | 1.7940127144  |
| C | -4.572406077  | -1.141490263  | 2.4841742793  |
| C | -4.2233557811 | -2.472358161  | 2.2207684652  |
| C | -3.2268216854 | -2.7223865325 | 1.270543875   |
| C | -1.5305482871 | -2.2257536086 | -0.3787431399 |
| C | -1.9440220535 | -2.8999763473 | -1.5448654757 |
| C | -1.0002805705 | -3.644032012  | -2.2699821126 |
| C | 0.3118352408  | -3.7339000316 | -1.7947231982 |
| C | 0.6747373977  | -3.0295570479 | -0.6226977836 |
| H | -4.2497955899 | 0.9209155648  | 2.0162095178  |
| H | -5.349685856  | -0.9011063788 | 3.2269718354  |
| H | -4.7122201097 | -3.306269269  | 2.7480483584  |
| H | -2.9337316792 | -3.7622556937 | 1.0540892332  |

|   |               |               |               |
|---|---------------|---------------|---------------|
| H | -2.9979234118 | -2.8556929374 | -1.8557706786 |
| H | -1.2978590663 | -4.1806921816 | -3.1847204423 |
| H | 1.0510266938  | -4.3675426224 | -2.3043991392 |
| N | -0.2390687605 | -2.2704998883 | 0.0379493268  |
| C | -2.2892994882 | 0.8638586144  | 0.0328530739  |
| C | -2.3480093538 | 2.2847177365  | 0.7945737303  |
| C | -3.2148876583 | 1.1985379963  | -1.2941279298 |
| C | -3.7420468427 | 2.8498506069  | 0.40307551    |
| C | -1.4435260223 | 3.2619275538  | -0.0169705355 |
| C | -3.5243917903 | 2.7249117508  | -1.1185447288 |
| H | -3.8612564645 | 3.9047063854  | 0.7334693509  |
| H | -4.6188710228 | 2.2853413185  | 0.7719287727  |
| H | -1.2620689337 | 4.172533161   | 0.5911407881  |
| H | -0.4588556946 | 2.8050136452  | -0.2166811863 |
| C | -2.2592145257 | 3.5915499273  | -1.2992192889 |
| H | -4.3765707255 | 3.0439096959  | -1.7551340104 |
| H | -2.5407513238 | 4.6648064941  | -1.3361718331 |
| H | -1.711806725  | 3.3839237741  | -2.240790879  |
| C | -4.5596801658 | 0.432167162   | -1.3238179833 |
| H | -5.1941706482 | 0.6186371342  | -0.4363367306 |
| H | -5.1385559735 | 0.7434343141  | -2.2195803364 |
| H | -4.40785887   | -0.664180655  | -1.3880264682 |
| C | -2.5088258831 | 0.8724741192  | -2.6139071799 |
| H | -3.1635958536 | 1.1422447315  | -3.4703162554 |
| H | -1.5605658797 | 1.4256546722  | -2.7616498178 |
| H | -2.276039538  | -0.2077592223 | -2.6937015218 |
| C | -1.9348030379 | 2.3004631787  | 2.2677229834  |
| H | -2.0172579845 | 3.3314688585  | 2.6731902124  |
| H | -2.5285448186 | 1.6327777968  | 2.9200003224  |
| H | -0.87519151   | 1.9898875252  | 2.3699906193  |
| C | -2.9149301928 | -0.3159738905 | 0.8281342265  |
| O | -0.952302915  | 0.4920481264  | -0.2635951617 |
| C | 2.037708146   | -3.1583774409 | -0.0392580656 |
| C | 2.2198335049  | -3.0948861567 | 1.3622037095  |
| C | 3.1671000718  | -3.4019854713 | -0.8565727175 |
| C | 3.4933538341  | -3.2600900706 | 1.9270652092  |
| H | 1.3474270833  | -2.9304221987 | 2.0112757697  |
| C | 4.4409494331  | -3.5619044086 | -0.2905554403 |

|    |               |               |               |
|----|---------------|---------------|---------------|
| H  | 3.0554393218  | -3.4354750699 | -1.9511958655 |
| C  | 4.6093848729  | -3.491607587  | 1.1038513598  |
| H  | 3.6128522491  | -3.2121609166 | 3.0209176198  |
| H  | 5.3099622341  | -3.7352182425 | -0.9448978728 |
| H  | 5.6094761778  | -3.6183143628 | 1.548034405   |
| Zn | 0.1609803096  | -0.443424184  | 1.197358849   |
| C  | 0.3318240026  | -0.5475803633 | 3.186940478   |
| H  | 1.4045851523  | -0.7570021484 | 3.4048573377  |
| H  | 0.1330210811  | 0.4471330342  | 3.6448171439  |
| Zn | 0.4194371506  | 0.6572988413  | -1.7908262538 |
| O  | 1.7353248973  | -0.0004110786 | -0.1154353038 |
| C  | 0.5985200201  | -0.3633982622 | -3.5115578017 |
| H  | 0.249096534   | 0.309789167   | -4.3282783017 |
| H  | -0.1298832594 | -1.2042872945 | -3.4877059344 |
| C  | 2.5095650876  | 0.99053614    | -0.4362466351 |
| C  | 1.4501135633  | 2.649319823   | -1.8924150367 |
| H  | 1.6280667284  | 3.3456366291  | -1.0520849378 |
| H  | 0.4246278038  | 2.8979652452  | -2.2648160695 |
| H  | 3.1711872849  | 0.8404995399  | -1.3190650721 |
| C  | 3.0278831021  | 1.9651347286  | 0.5497444481  |
| C  | 4.1968650226  | 2.7046233488  | 0.2429842914  |
| C  | 2.4087550626  | 2.1655866351  | 1.8059155475  |
| C  | 4.7225880637  | 3.6275994572  | 1.1588416926  |
| H  | 4.7012699935  | 2.5407916548  | -0.7230463121 |
| C  | 2.9365102172  | 3.0861957344  | 2.7219308937  |
| H  | 1.512174047   | 1.5817601422  | 2.0631523765  |
| C  | 4.0927305388  | 3.823187206   | 2.4018531703  |
| H  | 5.6341035715  | 4.1924379931  | 0.9062777212  |
| H  | 2.4434989299  | 3.2284348059  | 3.696693357   |
| H  | 4.5061447668  | 4.5453273065  | 3.123910319   |
| C  | -0.5610247975 | -1.6018518364 | 3.8613798614  |
| H  | -0.3985261436 | -2.6227834023 | 3.4479170079  |
| H  | -0.3884720973 | -1.6759941421 | 4.9608525838  |
| H  | -1.6407589944 | -1.3825158682 | 3.7187732863  |
| C  | 2.0006321616  | -0.8955379969 | -3.838190827  |
| H  | 2.0362935738  | -1.4780801574 | -4.7899723785 |
| H  | 2.7459138146  | -0.0777735662 | -3.9460004093 |
| H  | 2.3870666713  | -1.5630440543 | -3.0382743378 |

|   |              |              |               |
|---|--------------|--------------|---------------|
| C | 2.4493297193 | 2.8230592247 | -3.0283388642 |
| H | 2.5130683418 | 3.8799353655 | -3.3790580056 |
| H | 3.4845765331 | 2.5372148071 | -2.7359379705 |
| H | 2.1840735271 | 2.2051660219 | -3.9114142217 |
| H | 2.1840735271 | 2.2051660219 | -3.9114142217 |

TS 0114

E(RB-P86) = -5316.45414097 A.U.

First frequency = -194.2861 cm<sup>-1</sup>

|   |               |               |               |
|---|---------------|---------------|---------------|
| C | -2.5792073971 | -1.6707532622 | 0.6130122482  |
| C | -3.937417576  | -0.0357914871 | 1.762298394   |
| C | -4.6063554444 | -1.0409168279 | 2.4751921423  |
| C | -4.2759454288 | -2.3847957662 | 2.2590863554  |
| C | -3.2727786726 | -2.6808204869 | 1.3292602443  |
| C | -1.5579930286 | -2.2642673714 | -0.3246280711 |
| C | -1.9927697236 | -2.9964642826 | -1.4483557713 |
| C | -1.0623516032 | -3.7663078803 | -2.1628572701 |
| C | 0.2662095918  | -3.8068362034 | -1.7286917907 |
| C | 0.651117907   | -3.0392830295 | -0.6042998689 |
| H | -4.2439100364 | 0.9995653866  | 1.9460735039  |
| H | -5.3904425461 | -0.764216361  | 3.1979197882  |
| H | -4.7854589098 | -3.1936280288 | 2.8055022152  |
| H | -2.99638065   | -3.7318559369 | 1.1479103731  |
| H | -3.0547334461 | -2.9752793486 | -1.7332833729 |
| H | -1.3798987089 | -4.3519168556 | -3.0401223703 |
| H | 1.006757948   | -4.4426483331 | -2.234111074  |
| N | -0.2562131021 | -2.2777624331 | 0.06050439    |
| C | -2.2536669872 | 0.8544733489  | 0.002145034   |
| C | -2.3162788402 | 2.3008049049  | 0.7135949735  |
| C | -3.1397541744 | 1.1512168767  | -1.3580884801 |
| C | -3.6945475086 | 2.8646547528  | 0.2685347016  |
| C | -1.3818878728 | 3.2406959489  | -0.1092047394 |
| C | -3.4404634352 | 2.6852800376  | -1.2425125665 |
| H | -3.8121595042 | 3.9314851674  | 0.5585561656  |
| H | -4.5855530132 | 2.3208640896  | 0.6350641224  |
| H | -1.2051974244 | 4.16968812    | 0.4718501368  |
| H | -0.3968309108 | 2.7684349505  | -0.2694667802 |

|    |               |               |               |
|----|---------------|---------------|---------------|
| C  | -2.1632899028 | 3.5346290847  | -1.4212460857 |
| H  | -4.2739123309 | 2.9893133423  | -1.910443373  |
| H  | -2.4340479596 | 4.6083954211  | -1.5000263318 |
| H  | -1.595502402  | 3.2910896373  | -2.3416021912 |
| C  | -4.488938408  | 0.3942894406  | -1.401341479  |
| H  | -5.0416476755 | 0.6823839031  | -2.321083146  |
| H  | -4.3439154545 | -0.7044352273 | -1.4287963289 |
| H  | -5.144749636  | 0.611919051   | -0.5367176797 |
| C  | -2.3946274654 | 0.7739018866  | -2.6421477632 |
| H  | -3.0215376929 | 1.0116167839  | -3.5282244613 |
| H  | -1.4408537976 | 1.3212264422  | -2.7798775894 |
| H  | -2.1584403391 | -0.3085094884 | -2.6719054142 |
| C  | -1.9361343894 | 2.3603525097  | 2.1947633095  |
| H  | -2.5680806363 | 1.7416333318  | 2.859026126   |
| H  | -0.8917693169 | 2.0138912463  | 2.3331066064  |
| H  | -1.9875567394 | 3.4087920592  | 2.5582586327  |
| C  | -2.9101193051 | -0.2939111319 | 0.8200947758  |
| O  | -0.9142646607 | 0.4640813501  | -0.2490898129 |
| C  | 2.0453122373  | -3.0898486134 | -0.089234516  |
| C  | 2.2946890033  | -3.0638089345 | 1.3023303997  |
| C  | 3.1413936127  | -3.2036420073 | -0.9761378097 |
| C  | 3.6062578331  | -3.1501266432 | 1.7930832191  |
| H  | 1.4479790122  | -2.988840652  | 2.0011499466  |
| C  | 4.4527700936  | -3.2829416502 | -0.4830497658 |
| H  | 2.9668463563  | -3.1918870953 | -2.0634301001 |
| C  | 4.6895704487  | -3.2588278177 | 0.9032198682  |
| H  | 3.7826351523  | -3.1350587725 | 2.8801568905  |
| H  | 5.2970913355  | -3.3553775618 | -1.1869230102 |
| H  | 5.7191666894  | -3.3231713532 | 1.2897317753  |
| Zn | 0.1408791928  | -0.4767491126 | 1.2503810222  |
| C  | 0.2701757682  | -0.5850250933 | 3.2402946494  |
| H  | 1.3503461693  | -0.7221192878 | 3.4784221369  |
| H  | -0.0049786379 | 0.3919931249  | 3.6968728486  |
| Zn | 0.5115158595  | 0.613306975   | -1.7288678536 |
| O  | 1.7609033764  | -0.0095091498 | 0.0152914424  |
| C  | 0.8747489763  | -0.506602976  | -3.3584585947 |
| H  | 0.3668502925  | -1.4865319797 | -3.2247697343 |
| H  | 1.9668254756  | -0.7276751636 | -3.3200059067 |

|   |               |               |               |
|---|---------------|---------------|---------------|
| C | 2.5484943383  | 0.9756341954  | -0.2806914725 |
| C | 1.5849695788  | 2.5823518936  | -1.8594489541 |
| H | 1.652794622   | 3.3285121748  | -1.0453651617 |
| H | 0.6165337235  | 2.7996064777  | -2.3787586686 |
| H | 3.265524606   | 0.8062761233  | -1.1155967733 |
| C | 2.992204664   | 1.9812143506  | 0.711074031   |
| C | 4.1962210079  | 2.6937964154  | 0.4883895772  |
| C | 2.2654146444  | 2.2346787565  | 1.8982791084  |
| C | 4.6507276826  | 3.6429143534  | 1.4160890391  |
| H | 4.78762821    | 2.4853987479  | -0.4177511476 |
| C | 2.7206075301  | 3.1816091457  | 2.8257970079  |
| H | 1.3401649204  | 1.6714276801  | 2.0915815693  |
| C | 3.9126498324  | 3.8924118368  | 2.5875167035  |
| H | 5.5911985925  | 4.1854455658  | 1.2293402328  |
| H | 2.142654204   | 3.3653352327  | 3.7453762506  |
| H | 4.2693653513  | 4.6354928018  | 3.3185039225  |
| C | -0.5610585047 | -1.7007736753 | 3.894144041   |
| H | -0.323886052  | -2.7062551357 | 3.478607246   |
| H | -0.4017182519 | -1.7702732432 | 4.996006554   |
| H | -1.6505250506 | -1.5525994407 | 3.7355450799  |
| C | 0.5111629282  | 0.0836843886  | -4.7282326335 |
| H | 1.0046990751  | 1.062961145   | -4.9140003298 |
| H | 0.8033187348  | -0.580060532  | -5.5766549891 |
| H | -0.5813892703 | 0.2596286449  | -4.8333657991 |
| C | 2.7222680539  | 2.6988176948  | -2.8658781935 |
| H | 2.7422731009  | 3.692506536   | -3.3720146605 |
| H | 3.7209930701  | 2.5803208617  | -2.3922454693 |
| H | 2.6531154156  | 1.9311324474  | -3.6651539368 |
| H | 2.6531154156  | 1.9311324474  | -3.6651539368 |

TS 0125

E(RB-P86) = -5316.44819406 A.U.

First frequency = -193.9834  $\text{cm}^{-1}$

|   |               |               |              |
|---|---------------|---------------|--------------|
| C | -2.3886272336 | -1.6358358048 | 0.605793477  |
| C | -3.8589140636 | -0.0977191144 | 1.7522270331 |
| C | -4.4339540701 | -1.1423596854 | 2.4890692364 |
| C | -3.9883346414 | -2.4566559093 | 2.2973863562 |



|   |               |               |               |
|---|---------------|---------------|---------------|
| C | -2.9792945977 | -2.6868809352 | 1.3553143751  |
| C | -1.3780332319 | -2.1796223885 | -0.378590391  |
| C | -1.8483141423 | -2.8432556791 | -1.5295502748 |
| C | -0.963557174  | -3.6490577938 | -2.2603058924 |
| C | 0.3366403864  | -3.8306323854 | -1.7801902602 |
| C | 0.756060627   | -3.1430477489 | -0.6143956493 |
| H | -4.2433625651 | 0.9132326483  | 1.9260949596  |
| H | -5.2317629058 | -0.92013033   | 3.2155191351  |
| H | -4.4182568575 | -3.2942061136 | 2.8684486707  |
| H | -2.6236015057 | -3.7152646737 | 1.1832432833  |
| H | -2.9051173936 | -2.7471020664 | -1.8182631073 |
| H | -1.2963623732 | -4.1566575061 | -3.1795210401 |
| H | 1.0460304197  | -4.4848332444 | -2.3063362729 |
| N | -0.0808727604 | -2.2780752495 | 0.0216370168  |
| C | -2.210661188  | 0.88874753    | 0.0036095245  |
| C | -2.3178828568 | 2.3157418084  | 0.744623842   |
| C | -3.094163963  | 1.1849007638  | -1.3539032746 |
| C | -3.7149277321 | 2.8399005868  | 0.3092555109  |
| C | -1.4149477087 | 3.3045317532  | -0.0562356931 |
| C | -3.4527962741 | 2.7042275891  | -1.2047906362 |
| H | -3.8718926662 | 3.8946740855  | 0.6234178317  |
| H | -4.5853908799 | 2.2554512676  | 0.6619177697  |
| H | -1.2649620409 | 4.2240865476  | 0.5465366086  |
| H | -0.4148476728 | 2.8698166911  | -0.2313649971 |
| C | -2.2093643537 | 3.6051752147  | -1.3594984562 |
| H | -4.2960013944 | 2.9919360141  | -1.8675671786 |
| H | -2.5211787717 | 4.6695965858  | -1.4071416154 |
| H | -1.6342949123 | 3.4109549122  | -2.2867497748 |
| C | -4.4138061244 | 0.3794558604  | -1.4205528772 |
| H | -4.9719923131 | 0.6626047922  | -2.3384312014 |
| H | -4.2281871724 | -0.7125168894 | -1.4652657295 |
| H | -5.0817583502 | 0.5574489007  | -0.556063957  |
| C | -2.3258439045 | 0.8633289384  | -2.6402911563 |
| H | -1.3973064803 | 1.4563736949  | -2.7641952433 |
| H | -2.0413030988 | -0.2067430755 | -2.6847329009 |
| H | -2.9568183605 | 1.0872081299  | -3.5269537409 |
| C | -1.9493995544 | 2.3483782372  | 2.2293625648  |
| H | -1.9945905187 | 3.3908079253  | 2.610052854   |

|    |               |               |               |
|----|---------------|---------------|---------------|
| H  | -2.5954869896 | 1.725229351   | 2.8755796395  |
| H  | -0.909431237  | 1.9907974953  | 2.3730117947  |
| C  | -2.8208520632 | -0.2901998886 | 0.806450536   |
| O  | -0.858083209  | 0.5350988882  | -0.2484804503 |
| C  | 2.0932767845  | -3.4549592976 | -0.0267543324 |
| C  | 2.9408934431  | -2.4707303338 | 0.5289768962  |
| C  | 2.522734492   | -4.8061366168 | -0.0091486168 |
| C  | 4.1803279042  | -2.8308118473 | 1.0828215458  |
| H  | 2.6481770269  | -1.411383609  | 0.4832981119  |
| C  | 3.7590239995  | -5.1622048275 | 0.5510476395  |
| H  | 1.8638527956  | -5.593483106  | -0.4084717239 |
| C  | 4.5947382759  | -4.1736807075 | 1.099467021   |
| H  | 4.8316026733  | -2.0470333329 | 1.5013748487  |
| H  | 4.0659625866  | -6.2201075692 | 0.5672610693  |
| H  | 5.565931399   | -4.4505994442 | 1.539726514   |
| Zn | 0.2170922399  | -0.3881950848 | 1.2305580044  |
| C  | 0.4390083299  | -0.6327911315 | 3.195907155   |
| H  | 1.4879218173  | -0.3539187115 | 3.447004923   |
| H  | -0.2038690269 | 0.0924344857  | 3.7432172047  |
| Zn | 0.5679998583  | 0.7904332983  | -1.7098559252 |
| O  | 1.8376393468  | 0.3885842227  | 0.0740274642  |
| C  | 1.0627108604  | -0.3754139581 | -3.2667905787 |
| H  | 0.7166128854  | -1.4075974722 | -3.0427290243 |
| H  | 2.1756747795  | -0.4253070986 | -3.2465610054 |
| C  | 2.4782974026  | 1.4832705257  | -0.2158026872 |
| C  | 1.4555907228  | 2.8422385698  | -1.9615895161 |
| H  | 1.4852104921  | 3.6540459166  | -1.2114814458 |
| H  | 0.4705961212  | 2.9568535376  | -2.4801927808 |
| H  | 3.2638799949  | 1.4095552286  | -0.9999178956 |
| C  | 2.7038888681  | 2.5566509299  | 0.7780386461  |
| C  | 3.6669157916  | 3.5639838249  | 0.5174991378  |
| C  | 2.0145466837  | 2.582106784   | 2.0129998684  |
| C  | 3.9150522422  | 4.5772746195  | 1.4538580347  |
| H  | 4.2289554114  | 3.5434252953  | -0.4300059343 |
| C  | 2.2671887516  | 3.5931661563  | 2.9514078011  |
| H  | 1.2902575444  | 1.7846472469  | 2.2360823867  |
| C  | 3.213645855   | 4.5971940421  | 2.6744407635  |
| H  | 4.6665334592  | 5.3528540537  | 1.2360722756  |

|   |               |               |               |
|---|---------------|---------------|---------------|
| H | 1.7247963525  | 3.5943727188  | 3.9101391657  |
| H | 3.4118719254  | 5.3901855444  | 3.4130923134  |
| C | 0.1493534628  | -2.0610660852 | 3.6851903037  |
| H | -0.9017851166 | -2.3614741061 | 3.4858464673  |
| H | 0.7960963471  | -2.8116572175 | 3.1813420522  |
| H | 0.3147144527  | -2.179850507  | 4.7818151421  |
| C | 0.5819997047  | 0.0441471101  | -4.6624989061 |
| H | 0.9050648949  | 1.0737018729  | -4.9336255836 |
| H | 0.9650481255  | -0.6255851874 | -5.4688967038 |
| H | -0.5261644754 | 0.032155588   | -4.7475355585 |
| C | 2.5776166214  | 2.9401383237  | -2.9874588162 |
| H | 2.5703574233  | 3.9156488332  | -3.5278581407 |
| H | 3.5870851225  | 2.8535596021  | -2.5274355592 |
| H | 2.5118580923  | 2.1431029347  | -3.7567067045 |
| H | 2.5118580923  | 2.1431029347  | -3.7567067045 |

TS 0127

E(RB-P86) = -5316.45414119 A.U.

First frequency = -194.2774  $\text{cm}^{-1}$

|   |               |               |               |
|---|---------------|---------------|---------------|
| C | -2.544589236  | -1.6756898434 | 0.5257872616  |
| C | -3.9358691438 | -0.127629149  | 1.7531873581  |
| C | -4.5979384991 | -1.1808683586 | 2.3999735024  |
| C | -4.2472762582 | -2.5056134246 | 2.110204552   |
| C | -3.2312706663 | -2.734377085  | 1.1753452263  |
| C | -1.5063829851 | -2.200716816  | -0.4337801737 |
| C | -1.9202532428 | -2.8722994719 | -1.6023643633 |
| C | -0.9726081747 | -3.5875514811 | -2.3501802935 |
| C | 0.3520311389  | -3.6360804188 | -1.9049997703 |
| C | 0.7155823288  | -2.9298277259 | -0.734267208  |
| H | -4.2581801815 | 0.8913075161  | 1.9930878001  |
| H | -5.3926354093 | -0.9565901607 | 3.1292514444  |
| H | -4.7510245362 | -3.3512105831 | 2.6037495031  |
| H | -2.9388964472 | -3.7695003412 | 0.9366077625  |
| H | -2.9795651408 | -2.8483605219 | -1.8967868113 |
| H | -1.2736343338 | -4.125562471  | -3.2630303872 |
| H | 1.105909435   | -4.2322705897 | -2.4382358491 |
| N | -0.2083544308 | -2.2195761418 | -0.0364109057 |

|   |               |               |               |
|---|---------------|---------------|---------------|
| C | -2.2475866642 | 0.8845537654  | 0.0646972232  |
| C | -2.337483586  | 2.2866796594  | 0.8570576101  |
| C | -3.1241914195 | 1.2469658081  | -1.2857591837 |
| C | -3.7190809254 | 2.8565364833  | 0.4303653     |
| C | -1.4083595462 | 3.2848106813  | 0.0994715421  |
| C | -3.4475655508 | 2.7676728967  | -1.0856929473 |
| H | -3.8545696007 | 3.9032682902  | 0.779745622   |
| H | -4.6059263778 | 2.2806104775  | 0.75556878    |
| H | -1.2507288628 | 4.1812464551  | 0.7346321027  |
| H | -0.415140235  | 2.8359759739  | -0.0768692797 |
| C | -2.1807103869 | 3.6429297234  | -1.2019177097 |
| H | -4.2785718183 | 3.0983165466  | -1.7439527711 |
| H | -2.4656180203 | 4.7157322526  | -1.2221812344 |
| H | -1.6004743787 | 3.4600422442  | -2.1285416631 |
| C | -4.4621374858 | 0.4757268921  | -1.3867871272 |
| H | -4.3014597135 | -0.6175253143 | -1.4760023744 |
| H | -5.1293387503 | 0.6341965793  | -0.5180217664 |
| H | -5.0098288148 | 0.8090238805  | -2.2941786334 |
| C | -2.3611492877 | 0.9541192157  | -2.5812841286 |
| H | -2.9822792298 | 1.2345163059  | -3.4589150403 |
| H | -1.4135051093 | 1.5207242014  | -2.6769121526 |
| H | -2.1100729927 | -0.1216254066 | -2.6708283273 |
| C | -1.9725519647 | 2.2662412846  | 2.3431129649  |
| H | -0.9246090404 | 1.9270756291  | 2.4721865872  |
| H | -2.0426790022 | 3.2912274918  | 2.7655868254  |
| H | -2.6017495739 | 1.6015755925  | 2.9641907632  |
| C | -2.8961410549 | -0.3175284449 | 0.8084092011  |
| O | -0.9003683063 | 0.5272539136  | -0.1939148312 |
| C | 2.1051596623  | -2.9926248556 | -0.2081574767 |
| C | 2.3405448605  | -3.043846313  | 1.1851407359  |
| C | 3.2112832011  | -3.0416104519 | -1.0885368035 |
| C | 3.6482427471  | -3.142322926  | 1.6838789827  |
| H | 1.486165221   | -3.0197147878 | 1.8781903892  |
| C | 4.5186719766  | -3.1331873743 | -0.5870692493 |
| H | 3.0472859774  | -2.9692425422 | -2.175128288  |
| C | 4.7415392299  | -3.1862552223 | 0.8007013229  |
| H | 3.813732839   | -3.1878561794 | 2.771814886   |
| H | 5.3707075945  | -3.1545359909 | -1.2850241333 |

|    |               |               |               |
|----|---------------|---------------|---------------|
| H  | 5.7680331485  | -3.2602110781 | 1.1936891003  |
| Zn | 0.1522152532  | -0.4853598318 | 1.2598416882  |
| C  | 0.2629423834  | -0.7068528672 | 3.2414564531  |
| H  | 1.3426511567  | -0.8408613164 | 3.4833868784  |
| H  | -0.0326049018 | 0.2377344004  | 3.75051796    |
| Zn | 0.5378363832  | 0.7800058896  | -1.6473255914 |
| O  | 1.7781945634  | 0.0737219455  | 0.0715183012  |
| C  | 0.9326493678  | -0.2394122363 | -3.3344937222 |
| H  | 0.4366391859  | -1.2318410143 | -3.2626791662 |
| H  | 2.0271485133  | -0.4483088978 | -3.296879499  |
| C  | 2.5549259166  | 1.0847286444  | -0.1586279567 |
| C  | 1.5852772277  | 2.7672002666  | -1.652273601  |
| H  | 1.6354912019  | 3.465679655   | -0.7957238668 |
| H  | 0.6188640322  | 3.0017770019  | -2.1677902875 |
| H  | 3.2825463738  | 0.9734660365  | -0.9941345409 |
| C  | 2.9747075927  | 2.0370958363  | 0.8942227119  |
| C  | 4.1705032163  | 2.7778262067  | 0.7256651293  |
| C  | 2.2330373636  | 2.2112940467  | 2.0864847764  |
| C  | 4.6025067938  | 3.6776704156  | 1.7113978573  |
| H  | 4.7734553404  | 2.6304940279  | -0.1848434645 |
| C  | 2.6657624071  | 3.1089806555  | 3.0719241691  |
| H  | 1.3141077302  | 1.6251662818  | 2.2372448583  |
| C  | 3.8497593498  | 3.8486656108  | 2.8875754708  |
| H  | 5.536873514   | 4.2429631812  | 1.5661268729  |
| H  | 2.0764599951  | 3.2311227677  | 3.9945371296  |
| H  | 4.1888124164  | 4.552913561   | 3.6639998376  |
| C  | -0.5570591624 | -1.8712034942 | 3.8204775941  |
| H  | -0.3001590908 | -2.847130651  | 3.3498444058  |
| H  | -0.4074439618 | -2.0023387001 | 4.9180828493  |
| H  | -1.6471004055 | -1.7304461261 | 3.6591240635  |
| C  | 0.5750104311  | 0.4237981497  | -4.6720871431 |
| H  | 0.8841023446  | -0.1866337206 | -5.5538840993 |
| H  | -0.5186313975 | 0.5919750572  | -4.7785952579 |
| H  | 1.0576543856  | 1.4181184906  | -4.7963591703 |
| C  | 2.7303343973  | 2.9564193462  | -2.6386690434 |
| H  | 3.7260556371  | 2.8245435075  | -2.1622582837 |
| H  | 2.6796631697  | 2.2348370535  | -3.4811124208 |
| H  | 2.7411498997  | 3.9776082732  | -3.087052764  |

H 2.7411498997 3.9776082732 -3.087052764
